# Supplementary material for: DNA barcoding reveal patterns of species diversity among northwestern Pacific molluscs
Source: Springer Nature journal article supplement (doi:10.1038/srep33367), 2016-09-19
Supplement: 41598_2016_BFsrep33367_MOESM1_ESM.pdf [file 41598_2016_BFsrep33367_MOESM1_ESM.pdf]

**DNA barcoding reveal patterns of species diversity among northwestern Pacific molluscs**

Shao'e Sun, Qi Li\*, Lingfeng Kong, Hong Yu, Xiaodong Zheng, Ruihai Yu, Lina Dai, Yan Sun, Jun Chen, Jun Liu, Lehai Ni, Yanwei Feng, Zhenzhen Yu, Shanmei Zou, Jiping Lin

*Key Laboratory of Mariculture, Ministry of Education, Ocean University of China, Qingdao 266003, China*

\*Corresponding author: Tel: +8653282031622. Fax: +8653282032773.

E-mail: qili66@ouc.edu.cn

**Supplementary Table 1** List of analyzed specimens with detail data (taxonomy, voucher accession numbers, and collection sites).

| Class    | Order   | Family  | Genus          | Species                      | Accession No. | Site of collection                      |                      |          |       |
|----------|---------|---------|----------------|------------------------------|---------------|-----------------------------------------|----------------------|----------|-------|
| Bivalvia | Arcoida | Arcidae | <i>Anadara</i> | <i>Anadara antiquata</i>     | KU341897      | Lingao, Hainan province, China          |                      |          |       |
|          |         |         |                | <i>Anadara antiquata</i>     | KU341898      | Lingao, Hainan province, China          |                      |          |       |
|          |         |         |                | <i>Anadara antiquata</i>     | KU341899      | Lingao, Hainan province, China          |                      |          |       |
|          |         |         |                | <i>Anadara antiquata</i>     | KU341900      | Lingao, Hainan province, China          |                      |          |       |
|          |         |         |                | <i>Anadara antiquata</i>     | KU341901      | Sanya, Hainan province, China           |                      |          |       |
|          |         |         |                | <i>Anadara antiquata</i>     | KU341902      | Sanya, Hainan province, China           |                      |          |       |
|          |         |         |                | <i>Anadara antiquata</i>     | KU341903      | Weizhou Island, Guangxi province, China |                      |          |       |
|          |         |         |                | <i>Anadara antiquata</i>     | KU341904      | Qionghai, Hainan province, China        |                      |          |       |
|          |         |         |                | <i>Anadara antiquata</i>     | KU341905      | Qionghai, Hainan province, China        |                      |          |       |
|          |         |         |                | <i>Anadara crebricostata</i> | KU341891      | Beibhai, Guangxi province, China        |                      |          |       |
|          |         |         |                | <i>Anadara crebricostata</i> | KU341892      | Beibhai, Guangxi province, China        |                      |          |       |
|          |         |         |                | <i>Anadara crebricostata</i> | KU341893      | Beibhai, Guangxi province, China        |                      |          |       |
|          |         |         |                | <i>Anadara crebricostata</i> | KU341894      | Beibhai, Guangxi province, China        |                      |          |       |
|          |         |         |                | <i>Anadara crebricostata</i> | KU341895      | Beibhai, Guangxi province, China        |                      |          |       |
|          |         |         |                | <i>Anadara crebricostata</i> | KU341896      | Beibhai, Guangxi province, China        |                      |          |       |
|          |         |         |                | <i>Anadara vellicata</i>     | KU341881      | Beibhai, Guangxi province, China        |                      |          |       |
|          |         |         |                | <i>Anadara vellicata</i>     | KU341882      | Beibhai, Guangxi province, China        |                      |          |       |
|          |         |         |                | <i>Anadara vellicata</i>     | KU341883      | Beibhai, Guangxi province, China        |                      |          |       |
|          |         |         |                | <i>Anadara vellicata</i>     | KU341884      | Beibhai, Guangxi province, China        |                      |          |       |
|          |         |         |                | <i>Anadara vellicata</i>     | KU341885      | Beibhai, Guangxi province, China        |                      |          |       |
|          |         |         |                | <i>Anadara vellicata</i>     | KU341886      | Beibhai, Guangxi province, China        |                      |          |       |
|          |         |         |                | <i>Anadara vellicata</i>     | KU341887      | Beibhai, Guangxi province, China        |                      |          |       |
|          |         |         |                | <i>Anadara vellicata</i>     | KU341888      | Beibhai, Guangxi province, China        |                      |          |       |
|          |         |         |                | <i>Anadara vellicata</i>     | KU341889      | Beibhai, Guangxi province, China        |                      |          |       |
|          |         |         |                | <i>Anadara vellicata</i>     | KU341890      | Beibhai, Guangxi province, China        |                      |          |       |
|          |         |         |                |                              |               | <i>Arca</i>                             | <i>Arca avellana</i> | HM180481 | Korea |
|          |         |         |                |                              |               |                                         | <i>Arca avellana</i> | HM180482 | Korea |

|                  |                           |          |                                          |
|------------------|---------------------------|----------|------------------------------------------|
|                  | <i>Arca avellana</i>      | HM180483 | Korea                                    |
|                  | <i>Arca navicularis</i>   | HQ258822 | Weizhou Island, Guangxi province, China  |
|                  | <i>Arca navicularis</i>   | HQ258823 | Beibhai, Guangxi province, China         |
|                  | <i>Arca navicularis</i>   | HQ258824 | Beibhai, Guangxi province, China         |
|                  | <i>Arca navicularis</i>   | KU341928 | Beibhai, Guangxi province, China         |
|                  | <i>Arca navicularis</i>   | KU341929 | Beibhai, Guangxi province, China         |
| <i>Barbatia</i>  | <i>Barbatia fusca</i>     | AB050899 | Okinawa, nago, Okinawa, Japan            |
|                  | <i>Barbatia lacerata</i>  | HQ258828 | Weizhou, Guangxi province, China         |
|                  | <i>Barbatia lacerata</i>  | HQ258829 | Weizhou, Guangxi province, China         |
|                  | <i>Barbatia lacerata</i>  | HQ258830 | Weizhou, Guangxi province, China         |
|                  | <i>Barbatia lacerata</i>  | HQ258831 | Weizhou, Guangxi province, China         |
|                  | <i>Barbatia lacerata</i>  | HQ258832 | Weizhou, Guangxi province, China         |
|                  | <i>Barbatia lacerata</i>  | HQ258833 | Weizhou, Guangxi province, China         |
|                  | <i>Barbatia lacerata</i>  | HQ258834 | Weizhou, Guangxi province, China         |
|                  | <i>Barbatia lacerata</i>  | HQ258835 | Weizhou, Guangxi province, China         |
|                  | <i>Barbatia lacerata</i>  | HQ258826 | Weizhou, Guangxi province, China         |
|                  | <i>Barbatia lacerata</i>  | HQ258827 | Weizhou, Guangxi province, China         |
|                  | <i>Barbatia lacerata</i>  | HQ258836 | Weizhou, Guangxi province, China         |
|                  | <i>Barbatia lacerata</i>  | AB076932 | Okinawa, Iriomote Island, Okinawa, Japan |
|                  | <i>Barbatia lima</i>      | AB076931 | Kanagawa, Manazuru, Shiraiso, Japan      |
|                  | <i>Barbatia virescens</i> | KU341920 | Nanji, Zhejiang province, China          |
|                  | <i>Barbatia virescens</i> | KU341921 | Shengsi, Zhejiang province, China        |
|                  | <i>Barbatia virescens</i> | KU341922 | Lingao, Hainan province, China           |
|                  | <i>Barbatia virescens</i> | KU341923 | Shenzhen, Guangdong province, China      |
|                  | <i>Barbatia virescens</i> | KU341924 | Pingtang, Fujian province, China         |
|                  | <i>Barbatia virescens</i> | KU341925 | Xiapu, Fujian province, China            |
|                  | <i>Barbatia virescens</i> | KU341926 | Xiapu, Fujian province, China            |
|                  | <i>Barbatia virescens</i> | KU341927 | Fangchenggang, Guangxi province, China   |
| <i>Scapharca</i> | <i>Scapharca cornea</i>   | KU341858 | Lingao, Hainan province, China           |
|                  | <i>Scapharca cornea</i>   | KU341859 | Lingao, Hainan province, China           |
|                  | <i>Scapharca cornea</i>   | KU341860 | Lingao, Hainan province, China           |

|                                |          |                                      |
|--------------------------------|----------|--------------------------------------|
| <i>Scapharca cornea</i>        | KU341861 | Lingao, Hainan province, China       |
| <i>Scapharca cornea</i>        | KU341862 | Lingao, Hainan province, China       |
| <i>Scapharca cornea</i>        | KU341863 | Lingao, Hainan province, China       |
| <i>Scapharca cornea</i>        | KU341864 | Lingao, Hainan province, China       |
| <i>Scapharca globosa</i>       | KU341846 | Sanya, Hainan province, China        |
| <i>Scapharca globosa</i>       | KU341847 | Sanya, Hainan province, China        |
| <i>Scapharca globosa</i>       | KU341848 | Sanya, Hainan province, China        |
| <i>Scapharca globosa</i>       | KU341849 | Sanya, Hainan province, China        |
| <i>Scapharca globosa</i>       | KU341850 | Sanya, Hainan province, China        |
| <i>Scapharca globosa</i>       | KU341851 | Sanya, Hainan province, China        |
| <i>Scapharca globosa</i>       | KU341852 | Sanya, Hainan province, China        |
| <i>Scapharca globosa</i>       | KU341853 | Sanya, Hainan province, China        |
| <i>Scapharca globosa</i>       | AB254194 | Saga, Japan                          |
| <i>Scapharca gubernaculum</i>  | KU341854 | Lingao, Hainan province, China       |
| <i>Scapharca gubernaculum</i>  | KU341855 | Lingao, Hainan province, China       |
| <i>Scapharca gubernaculum</i>  | KU341856 | Lingao, Hainan province, China       |
| <i>Scapharca gubernaculum</i>  | KU341857 | Lingao, Hainan province, China       |
| <i>Scapharca inaequalvis</i>   | KU341865 | Sanya, Hainan province, China        |
| <i>Scapharca inaequalvis</i>   | KU341866 | Beibhai, Guangxi province, China     |
| <i>Scapharca inaequalvis</i>   | KU341867 | Beibhai, Guangxi province, China     |
| <i>Scapharca inaequalvis</i>   | KU341868 | Beibhai, Guangxi province, China     |
| <i>Scapharca inaequalvis</i>   | AB076937 | Osaka, Japan                         |
| <i>Scapharca broughtonii</i>   | KU341869 | Lianyungang, Jiangsu province, China |
| <i>Scapharca broughtonii</i>   | KU341870 | Panjin, Liaoning province, China     |
| <i>Scapharca broughtonii</i>   | KU341871 | Rongcheng, Shandong province, China  |
| <i>Scapharca broughtonii</i>   | KU341872 | Haiyang, Shandong province, China    |
| <i>Scapharca broughtonii</i>   | KU341873 | Lianyungang, Jiangsu province, China |
| <i>Scapharca broughtonii</i>   | AB050894 | Kanagawa, Yokohama (market), Japan   |
| <i>Scapharca broughtonii</i>   | AB729113 | Sendai Bay, Japan                    |
| <i>Scapharca kagoshimensis</i> | KU341874 | Beibhai, Guangxi province, China     |
| <i>Scapharca kagoshimensis</i> | KU341875 | Beibhai, Guangxi province, China     |

|                   |                                |          |                                      |
|-------------------|--------------------------------|----------|--------------------------------------|
|                   | <i>Scapharca kagoshimensis</i> | KU341876 | Beibhai, Guangxi province, China     |
|                   | <i>Scapharca kagoshimensis</i> | KU341877 | Ganyu, Jiangsu province, China       |
|                   | <i>Scapharca kagoshimensis</i> | KU341878 | Dandong, Liaoning province, China    |
|                   | <i>Scapharca kagoshimensis</i> | KU341879 | Lianyungang, Jiangsu province, China |
|                   | <i>Scapharca kagoshimensis</i> | KU341880 | Qinhuangdao, Hebei province, China   |
|                   | <i>Scapharca kagoshimensis</i> | AB854392 | Japan                                |
|                   | <i>Scapharca kagoshimensis</i> | AB854393 | Japan                                |
|                   | <i>Scapharca kagoshimensis</i> | AB854394 | Japan                                |
|                   | <i>Scapharca kagoshimensis</i> | AB854395 | Japan                                |
|                   | <i>Scapharca kagoshimensis</i> | AB854396 | Japan                                |
|                   | <i>Scapharca kagoshimensis</i> | AB854397 | Japan                                |
|                   | <i>Scapharca kagoshimensis</i> | AB854398 | Japan                                |
|                   | <i>Scapharca kagoshimensis</i> | AB854399 | Japan                                |
|                   | <i>Scapharca kagoshimensis</i> | AB854400 | Japan                                |
|                   | <i>Scapharca kagoshimensis</i> | AB854401 | Japan                                |
|                   | <i>Scapharca kagoshimensis</i> | AB854402 | Japan                                |
|                   | <i>Scapharca kagoshimensis</i> | AB854403 | Japan                                |
|                   | <i>Scapharca kagoshimensis</i> | AB854404 | Japan                                |
|                   | <i>Scapharca kagoshimensis</i> | AB854405 | Japan                                |
|                   | <i>Scapharca satowi</i>        | AB050898 | Chiba, Japan                         |
| <i>Tegillarca</i> | <i>Tegillarca granosa</i>      | KU341910 | Wenchang, Hainan province, China     |
|                   | <i>Tegillarca granosa</i>      | KU341911 | Wenchang, Hainan province, China     |
|                   | <i>Tegillarca granosa</i>      | KU341912 | Wenchang, Hainan province, China     |
|                   | <i>Tegillarca granosa</i>      | KU341913 | Wenchang, Hainan province, China     |
|                   | <i>Tegillarca granosa</i>      | KU341914 | Wenchang, Hainan province, China     |
|                   | <i>Tegillarca granosa</i>      | KU341915 | Wenchang, Hainan province, China     |
|                   | <i>Tegillarca granosa</i>      | KU341916 | Yueqing, Zhejiang province, China    |
|                   | <i>Tegillarca granosa</i>      | KU341917 | Zhanjiang, Guangdong province, China |
|                   | <i>Tegillarca granosa</i>      | KU341918 | Shengsi, Zhejiang province, China    |
|                   | <i>Tegillarca granosa</i>      | KU341919 | Rongcheng, Shandong province, China  |
|                   | <i>Tegillarca granosa</i>      | HQ258868 | Xiamen, Fujian province, China       |

|        |                |                   |                              |          |                                        |
|--------|----------------|-------------------|------------------------------|----------|----------------------------------------|
|        |                |                   | <i>Tegillarca nodifera</i>   | KU341906 | Ganyu, Jiangsu province, China         |
|        |                |                   | <i>Tegillarca nodifera</i>   | KU341907 | Ganyu, Jiangsu province, China         |
|        |                |                   | <i>Tegillarca nodifera</i>   | KU341908 | Ganyu, Jiangsu province, China         |
|        |                |                   | <i>Tegillarca nodifera</i>   | KU341909 | Ganyu, Jiangsu province, China         |
|        |                | <i>Trisidos</i>   | <i>Trisidos kiyonoi</i>      | HQ258842 | Wenchang, Hainan province, China       |
|        |                |                   | <i>Trisidos kiyonoi</i>      | HQ258843 | Wenchang, Hainan province, China       |
|        |                |                   | <i>Trisidos kiyonoi</i>      | KU341930 | Wenchang, Hainan province, China       |
|        |                |                   | <i>Trisidos kiyonoi</i>      | KU341931 | Wenchang, Hainan province, China       |
|        |                |                   | <i>Trisidos kiyonoi</i>      | HQ258845 | Wenchang, Hainan province, China       |
|        |                |                   | <i>Trisidos kiyonoi</i>      | HQ258846 | Beibhai, Guangxi province, China       |
|        | Glycymerididae | <i>Glycymeris</i> | <i>Glycymeris reevei</i>     | AB076933 | Okinawa, Okinawa, Japan                |
|        |                |                   | <i>Glycymeris rotunda</i>    | AB076934 | Kanagawa, Misaki, Japan                |
|        | Noetiidae      | <i>Arcopsis</i>   | <i>Arcopsis interplicata</i> | HQ258875 | Rizhao, Shandong province, China       |
|        |                |                   | <i>Arcopsis interplicata</i> | HQ258876 | Rizhao, Shandong province, China       |
|        |                |                   | <i>Arcopsis interplicata</i> | HQ258877 | Rizhao, Shandong province, China       |
|        |                |                   | <i>Arcopsis interplicata</i> | HQ258878 | Rizhao, Shandong province, China       |
|        |                |                   | <i>Arcopsis interplicata</i> | HQ258879 | Rizhao, Shandong province, China       |
|        |                | <i>Didimacar</i>  | <i>Didimacar tenebrica</i>   | KU341932 | Beibhai, Guangxi province, China       |
|        |                |                   | <i>Didimacar tenebrica</i>   | KU341933 | Fangchenggang, Guangxi province, China |
|        |                |                   | <i>Didimacar tenebrica</i>   | KU341934 | Nanji, Zhejiang province, China        |
|        |                |                   | <i>Didimacar tenebrica</i>   | KU341935 | Nanji, Zhejiang province, China        |
|        |                |                   | <i>Didimacar tenebrica</i>   | KU341936 | Nanji, Zhejiang province, China        |
|        |                |                   | <i>Didimacar tenebrica</i>   | HQ258871 | Nanji, Zhejiang province, China        |
| Myoida | Corbulidae     | <i>Corbula</i>    | <i>Corbula amurensis</i>     | KJ028746 | Fenshui, Shandong province, China      |
|        |                |                   | <i>Corbula amurensis</i>     | KJ028747 | Panjin, Liaoning province, China       |
|        |                |                   | <i>Corbula amurensis</i>     | KJ028748 | Panjin, Liaoning province, China       |
|        |                |                   | <i>Corbula amurensis</i>     | KJ028749 | Panjin, Liaoning province, China       |
|        |                |                   | <i>Corbula amurensis</i>     | KJ028750 | Panjin, Liaoning province, China       |
|        |                |                   | <i>Corbula amurensis</i>     | KJ028751 | Fenshui, Shandong province, China      |
|        |                |                   | <i>Corbula amurensis</i>     | KJ028752 | Fenshui, Shandong province, China      |
|        |                |                   | <i>Corbula amurensis</i>     | KJ028753 | Zhoushan, Zhejiang province, China     |

|           |            |                  |                            |          |                                      |
|-----------|------------|------------------|----------------------------|----------|--------------------------------------|
|           |            |                  | <i>Corbula amurensis</i>   | KJ028754 | Zhoushan, Zhejiang province, China   |
|           |            |                  | <i>Corbula amurensis</i>   | KJ028755 | Zhoushan, Zhejiang province, China   |
|           |            |                  | <i>Corbula amurensis</i>   | KJ028756 | Shengsi, Zhejiang province, China    |
|           |            |                  | <i>Corbula amurensis</i>   | KJ028757 | Shengsi, Zhejiang province, China    |
|           |            |                  | <i>Corbula erythrodon</i>  | KJ125419 | Haishantang, Guangxi province, China |
|           | Myidae     | <i>Mya</i>       | <i>Mya arenaria</i>        | KJ125420 | Rongcheng, Shandong province, China  |
|           |            |                  | <i>Mya arenaria</i>        | KJ125421 | Rongcheng, Shandong province, China  |
|           | Pholadidae | <i>Barnea</i>    | <i>Barnea davidi</i>       | KJ125426 | China                                |
|           |            |                  | <i>Barnea dilatata</i>     | KJ125414 | China                                |
|           |            |                  | <i>Barnea dilatata</i>     | KJ125415 | China                                |
|           |            | <i>Martesia</i>  | <i>Martesia striata</i>    | KJ125424 | China                                |
|           |            |                  | <i>Martesia striata</i>    | KJ125425 | China                                |
|           |            | <i>Pholas</i>    | <i>Pholas orientalis</i>   | KJ125422 | Sanya, Hainan province, China        |
|           |            |                  | <i>Pholas orientalis</i>   | KJ125423 | Sanya, Hainan province, China        |
| Mytiloida | Mytilidae  | <i>Adipicola</i> | <i>Adipicola crypta</i>    | AB539004 | Kagoshima, Japan                     |
|           |            |                  | <i>Adipicola crypta</i>    | AB257519 | Kagoshima, Japan                     |
|           |            |                  | <i>Adipicola crypta</i>    | AB257518 | Kagoshima, Japan                     |
|           |            |                  | <i>Adipicola crypta</i>    | AB257517 | Kagoshima, Japan                     |
|           |            |                  | <i>Adipicola crypta</i>    | AB257516 | Kagoshima, Japan                     |
|           |            |                  | <i>Adipicola crypta</i>    | AB257515 | Kagoshima, Japan                     |
|           |            |                  | <i>Adipicola iwaotakii</i> | AB257523 | Ibaraki, Japan                       |
|           |            |                  | <i>Adipicola iwaotakii</i> | AB257521 | Ibaraki, Japan                       |
|           |            |                  | <i>Adipicola iwaotakii</i> | AB257520 | Ibaraki, Japan                       |
|           |            |                  | <i>Adipicola iwaotakii</i> | EU702325 | Japan                                |
|           |            |                  | <i>Adipicola iwaotakii</i> | EU702324 | Japan                                |
|           |            |                  | <i>Adipicola iwaotakii</i> | EU702323 | Japan                                |
|           |            |                  | <i>Adipicola pacifica</i>  | AB539005 | Kagoshima, Japan                     |
|           |            |                  | <i>Adipicola pacifica</i>  | HF545115 | Japan                                |
|           |            |                  | <i>Adipicola pacifica</i>  | AB170040 | Kagoshima, Japan                     |
|           |            |                  | <i>Adipicola pacifica</i>  | AB257528 | Kagoshima, Japan                     |
|           |            |                  | <i>Adipicola pacifica</i>  | AB257527 | Kagoshima, Japan                     |

|                      |                                   |          |                                                                |
|----------------------|-----------------------------------|----------|----------------------------------------------------------------|
|                      | <i>Adipicola pacifica</i>         | AB257526 | Kagoshima, Japan                                               |
| <i>Bathymodiolus</i> | <i>Bathymodiolus aduloides</i>    | AB170054 | Iheya Ridge, Mid-Okinawa Trough, Okinawa, Japan                |
|                      | <i>Bathymodiolus aduloides</i>    | AB170055 | Off Kikaijima Island, Japan                                    |
|                      | <i>Bathymodiolus aduloides</i>    | AB170056 | Off Kikaijima Island, Japan                                    |
|                      | <i>Bathymodiolus aduloides</i>    | AB170057 | Off Kikaijima Island, Japan                                    |
|                      | <i>Bathymodiolus aduloides</i>    | AB170058 | Off Kikaijima Island, Japan                                    |
|                      | <i>Bathymodiolus aduloides</i>    | AB170059 | Off Kikaijima Island, Japan                                    |
|                      | <i>Bathymodiolus aduloides</i>    | HF545118 | Japan                                                          |
|                      | <i>Bathymodiolus aduloides</i>    | AB597557 | Myojinsho, Izu-Ogasawara area, Japan                           |
|                      | <i>Bathymodiolus hirtus</i>       | AB250694 | Off-ishigaki Island, Kuroshima Knoll, Japan                    |
|                      | <i>Bathymodiolus hirtus</i>       | AB170047 | Kuroshima Knoll, Off Yaeyama Islands, Japan                    |
|                      | <i>Bathymodiolus japonicus</i>    | HF545108 | Japan                                                          |
|                      | <i>Bathymodiolus japonicus</i>    | AB101422 | Okinawa, Minami-Ensei Knoll, Okinawa, Japan                    |
|                      | <i>Bathymodiolus japonicus</i>    | AB101423 | Off Hatsushima and Okinawa, Minami-Ensei Knoll, Okinawa, Japan |
|                      | <i>Bathymodiolus platifrons</i>   | HF545106 | Japan                                                          |
|                      | <i>Bathymodiolus platifrons</i>   | AB101419 | Kanagawa, Off Hatsushima, Japan                                |
|                      | <i>Bathymodiolus platifrons</i>   | AB101420 | Kanagawa, Off Hatsushima, Japan                                |
|                      | <i>Bathymodiolus platifrons</i>   | AB101421 | Off Hatsushima and Okinawa, Iheya Ridge, Okinawa, Japan        |
|                      | <i>Bathymodiolus platifrons</i>   | AB250695 | Okinawa Trough, Hatoma Knoll, Okinawa, Japan                   |
|                      | <i>Bathymodiolus securiformis</i> | AB170048 | Kuroshima Knoll, Off Yaeyama Islands, Japan                    |
|                      | <i>Bathymodiolus securiformis</i> | AB170051 | Kuroshima Knoll, Off Yaeyama Islands, Japan                    |
|                      | <i>Bathymodiolus securiformis</i> | AB170052 | Dai-ni (no. 2) Atsumi Knoll, Nankai Trough, Japan              |
|                      | <i>Bathymodiolus securiformis</i> | AB170053 | Dai-ni (no. 3) Atsumi Knoll, Nankai Trough, Japan              |
|                      | <i>Bathymodiolus septemdirum</i>  | AB101424 | Izu-Ogasawara Island-arc, Myojin Knoll, Japan                  |
|                      | <i>Bathymodiolus</i>              | AB101425 | Izu-Ogasawara Island-arc, Myojin Knoll, Japan                  |



|                       |                               |          |                                                 |
|-----------------------|-------------------------------|----------|-------------------------------------------------|
|                       | <i>septemdiolum</i>           |          |                                                 |
|                       | <i>Bathymodiolum</i>          | AB101426 | Izu-Ogasawara Island-arc, Myojin Knoll, Japan   |
|                       | <i>septemdiolum</i>           |          |                                                 |
|                       | <i>Bathymodiolum</i>          | AB101427 | Izu-Ogasawara Island-arc, Myojin Knoll, Japan   |
|                       | <i>septemdiolum</i>           |          |                                                 |
|                       | <i>Bathymodiolum</i>          | AB101428 | Izu-Ogasawara Island-arc, Suiyo Seamount, Japan |
|                       | <i>septemdiolum</i>           |          |                                                 |
|                       | <i>Bathymodiolum</i>          | AB101429 | Izu-Ogasawara Island-arc, Suiyo Seamount, Japan |
|                       | <i>septemdiolum</i>           |          |                                                 |
|                       | <i>Bathymodiolum</i>          | AB101430 | Izu-Ogasawara Island-arc, Suiyo Seamount, Japan |
|                       | <i>septemdiolum</i>           |          |                                                 |
|                       | <i>Bathymodiolum</i>          | AB170041 | Izu-Ogasawara Island-arc, Japan                 |
|                       | <i>septemdiolum</i>           |          |                                                 |
| <i>Benthomodiolum</i> | <i>Benthomodiolum</i>         | AB679346 | Tokyo, Torishima seamount, Japan                |
|                       | <i>geikotsucola</i>           |          |                                                 |
|                       | <i>Benthomodiolum</i>         | HF545103 | Japan                                           |
|                       | <i>geikotsucola</i>           |          |                                                 |
| <i>Gigantidas</i>     | <i>Gigantidas horikoshii</i>  | HF545113 | Japan                                           |
|                       | <i>Gigantidas horikoshii</i>  | AB257538 | Kaikata Seamount, Japan                         |
| <i>Hormomya</i>       | <i>Brachidontes mutalilis</i> | GQ480306 | Fangchenggang, Guangxi province, China          |
|                       | <i>Brachidontes mutalilis</i> | GQ480307 | Fangchenggang, Guangxi province, China          |
|                       | <i>Brachidontes mutalilis</i> | GQ480308 | Fangchenggang, Guangxi province, China          |
|                       | <i>Brachidontes mutalilis</i> | GQ480309 | Lingao, Hainan province, China                  |
|                       | <i>Brachidontes mutalilis</i> | GQ480310 | Lingao, Hainan province, China                  |
| <i>Idasola</i>        | <i>Idasola japonica</i>       | AB257537 | Kagoshima, Japan                                |
|                       | <i>Idasola japonica</i>       | AB257536 | Kagoshima, Japan                                |
| <i>Limnoperla</i>     | <i>Limnoperla fortunei</i>    | AB828682 | Toride, Japan                                   |
|                       | <i>Limnoperla fortunei</i>    | AB828681 | Teganuma, Japan                                 |
|                       | <i>Limnoperla fortunei</i>    | AB828680 | Teganuma, Japan                                 |
|                       | <i>Limnoperla fortunei</i>    | AB828679 | Japan                                           |
|                       | <i>Limnoperla fortunei</i>    | AB520627 | Ibaraki, Japan                                  |

|                 |                             |          |                                        |
|-----------------|-----------------------------|----------|----------------------------------------|
|                 | <i>Limnoperna fortunei</i>  | AB520626 | Ibaraki, Japan                         |
|                 | <i>Limnoperna fortunei</i>  | AB520625 | Ibaraki, Japan                         |
|                 | <i>Limnoperna fortunei</i>  | AB520624 | Ibaraki, Japan                         |
|                 | <i>Limnoperna fortunei</i>  | AB520623 | Ibaraki, Japan                         |
|                 | <i>Limnoperna fortunei</i>  | AB520622 | Chiba, Japan                           |
|                 | <i>Limnoperna fortunei</i>  | AB520621 | Chiba, Japan                           |
|                 | <i>Limnoperna fortunei</i>  | AB520620 | Chiba, Japan                           |
|                 | <i>Limnoperna fortunei</i>  | AB520619 | Chiba, Japan                           |
|                 | <i>Limnoperna fortunei</i>  | AB520618 | Chiba, Japan                           |
|                 | <i>Limnoperna fortunei</i>  | AB520617 | Chiba, Japan                           |
|                 | <i>Limnoperna fortunei</i>  | AB520616 | Chiba, Japan                           |
|                 | <i>Limnoperna fortunei</i>  | AB520615 | Chiba, Japan                           |
|                 | <i>Limnoperna fortunei</i>  | AB520614 | Chiba, Japan                           |
|                 | <i>Limnoperna fortunei</i>  | AB520613 | Kanto, Lake Ohshio, Kanto, Japan       |
|                 | <i>Limnoperna fortunei</i>  | AB520612 | Kanto, Lake Ohshio, Kanto, Japan       |
| <i>Modiolus</i> | <i>Modiolus auriculatus</i> | GQ480317 | Sanya, Hainan province, China          |
|                 | <i>Modiolus comptus</i>     | GQ480313 | Nanji, Zhejiang province, China        |
|                 | <i>Modiolus comptus</i>     | GQ480314 | Nanji, Zhejiang province, China        |
|                 | <i>Modiolus comptus</i>     | GQ480315 | Shengshan, Zhejiang province, China    |
|                 | <i>Modiolus comptus</i>     | GQ480316 | Shengshan, Zhejiang province, China    |
|                 | <i>Modiolus elongatus</i>   | GQ480318 | Fenshui, Shandong province, China      |
|                 | <i>Modiolus kurilensis</i>  | KP243079 | China                                  |
|                 | <i>Modiolus kurilensis</i>  | KP243078 | China                                  |
|                 | <i>Modiolus kurilensis</i>  | KP243077 | China                                  |
|                 | <i>Modiolus kurilensis</i>  | KP243076 | China                                  |
|                 | <i>Modiolus kurilensis</i>  | KP243075 | China                                  |
|                 | <i>Modiolus kurilensis</i>  | KP243074 | China                                  |
|                 | <i>Modiolus metcalfei</i>   | GQ480319 | Beibhai, Guangxi province, China       |
|                 | <i>Modiolus metcalfei</i>   | GQ480320 | Beibhai, Guangxi province, China       |
|                 | <i>Modiolus metcalfei</i>   | GQ480321 | Fangchenggang, Guangxi province, China |
|                 | <i>Modiolus metcalfei</i>   | GQ480322 | Fangchenggang, Guangxi province, China |

|                   |                                  |          |                                      |
|-------------------|----------------------------------|----------|--------------------------------------|
|                   | <i>Modiolus nipponicus</i>       | AB076912 | Kanagawa, Manazuru, Siraiso, Japan   |
| <i>Musculista</i> | <i>Musculista senhousia</i>      | AB076942 | Kanagawa, Ooiso, Japan               |
|                   | <i>Musculista senhousia</i>      | AB498016 | Tokyo, Daiba, Japan                  |
| <i>Mytilus</i>    | <i>Mytilus coruscus</i>          | GQ480287 | Zhoushan, Zhejiang province, China   |
|                   | <i>Mytilus coruscus</i>          | GQ480288 | Zhoushan, Zhejiang province, China   |
|                   | <i>Mytilus coruscus</i>          | GQ480289 | Zhoushan, Zhejiang province, China   |
|                   | <i>Mytilus coruscus</i>          | GQ480290 | Zhoushan, Zhejiang province, China   |
|                   | <i>Mytilus coruscus</i>          | GQ480291 | Zhoushan, Zhejiang province, China   |
|                   | <i>Mytilus coruscus</i>          | GQ480295 | Zhoushan, Zhejiang province, China   |
|                   | <i>Mytilus coruscus</i>          | GQ480283 | Zhoushan, Zhejiang province, China   |
|                   | <i>Mytilus edulis</i>            | HM180704 | Korea                                |
|                   | <i>Mytilus galloprovincialis</i> | HM180705 | Korea                                |
|                   | <i>Mytilus galloprovincialis</i> | HM180706 | Korea                                |
|                   | <i>Mytilus galloprovincialis</i> | HM180707 | Korea                                |
|                   | <i>Mytilus galloprovincialis</i> | HM180708 | Korea                                |
|                   | <i>Mytilus galloprovincialis</i> | HM180709 | Korea                                |
|                   | <i>Mytilus galloprovincialis</i> | HM180710 | Korea                                |
|                   | <i>Mytilus galloprovincialis</i> | HM180711 | Korea                                |
|                   | <i>Mytilus galloprovincialis</i> | HM180712 | Korea                                |
|                   | <i>Mytilus galloprovincialis</i> | GQ480281 | Haiyang, Shandong province, China    |
|                   | <i>Mytilus galloprovincialis</i> | GQ480282 | Lianyungang, Jiangsu province, China |
|                   | <i>Mytilus galloprovincialis</i> | GQ480284 | Qingdao, Shandong province, China    |
|                   | <i>Mytilus galloprovincialis</i> | GQ480285 | Qingdao, Shandong province, China    |
|                   | <i>Mytilus galloprovincialis</i> | GQ480286 | Qingdao, Shandong province, China    |
|                   | <i>Mytilus galloprovincialis</i> | GQ480292 | Lianyungang, Jiangsu province, China |
|                   | <i>Mytilus galloprovincialis</i> | GQ480293 | Lianyungang, Jiangsu province, China |
|                   | <i>Mytilus galloprovincialis</i> | GQ480294 | Lianyungang, Jiangsu province, China |
| <i>Perna</i>      | <i>Perna viridis</i>             | GQ480296 | Lingao, Hainan province, China       |
|                   | <i>Perna viridis</i>             | GQ480297 | Lingao, Hainan province, China       |
|                   | <i>Perna viridis</i>             | GQ480298 | Lingao, Hainan province, China       |
|                   | <i>Perna viridis</i>             | GQ480299 | Lingao, Hainan province, China       |

|           |           |                    |                               |          |                                      |
|-----------|-----------|--------------------|-------------------------------|----------|--------------------------------------|
|           |           |                    | <i>Perna viridis</i>          | GQ480300 | Lingao, Hainan province, China       |
|           |           |                    | <i>Perna viridis</i>          | GQ480301 | Yangjiang, Guangdong province, China |
|           |           |                    | <i>Perna viridis</i>          | GQ480302 | Yangjiang, Guangdong province, China |
|           |           |                    | <i>Perna viridis</i>          | GQ480303 | Yangjiang, Guangdong province, China |
|           |           |                    | <i>Perna viridis</i>          | GQ480304 | Yangjiang, Guangdong province, China |
|           |           | <i>Xenostrobus</i> | <i>Xenostrobus atratus</i>    | GQ480323 | Beihai, Guangxi province, China      |
|           |           |                    | <i>Xenostrobus atratus</i>    | GQ480324 | Beihai, Guangxi province, China      |
|           |           |                    | <i>Xenostrobus atratus</i>    | GQ480325 | Beihai, Guangxi province, China      |
|           |           |                    | <i>Xenostrobus atratus</i>    | GQ480326 | Beihai, Guangxi province, China      |
|           |           |                    | <i>Xenostrobus atratus</i>    | GQ480327 | Beihai, Guangxi province, China      |
| Ostreoida | Ostreidae | <i>Crassostrea</i> | <i>Crassostrea angulata</i>   | HQ661008 | Yangjiang, Guangdong province, China |
|           |           |                    | <i>Crassostrea angulata</i>   | HQ661009 | Pingtang, Fujian province, China     |
|           |           |                    | <i>Crassostrea angulata</i>   | EU672832 | Taiwan, China                        |
|           |           |                    | <i>Crassostrea angulata</i>   | AB904879 | Kagoshima, Japan                     |
|           |           |                    | <i>Crassostrea angulata</i>   | AB904880 | Kagoshima, Japan                     |
|           |           |                    | <i>Crassostrea angulata</i>   | AB904881 | Kagoshima, Japan                     |
|           |           |                    | <i>Crassostrea angulata</i>   | AB904882 | Kagoshima, Japan                     |
|           |           |                    | <i>Crassostrea angulata</i>   | AB904883 | Kagoshima, Japan                     |
|           |           |                    | <i>Crassostrea angulata</i>   | AB904885 | Kagoshima, Japan                     |
|           |           |                    | <i>Crassostrea angulata</i>   | AB904886 | Kagoshima, Japan                     |
|           |           |                    | <i>Crassostrea angulata</i>   | AB904887 | Kagoshima, Japan                     |
|           |           |                    | <i>Crassostrea angulata</i>   | AB904888 | Kagoshima, Japan                     |
|           |           |                    | <i>Crassostrea angulata</i>   | AB904890 | Kagoshima, Japan                     |
|           |           |                    | <i>Crassostrea ariakensis</i> | HQ661020 | Nantong, Jiangsu province, China     |
|           |           |                    | <i>Crassostrea ariakensis</i> | HQ661021 | Nantong, Jiangsu province, China     |
|           |           |                    | <i>Crassostrea ariakensis</i> | EU672835 | Yingkou, Liaoning province, China    |
|           |           |                    | <i>Crassostrea gigas</i>      | HQ661002 | Rongcheng, Shandong province, China  |
|           |           |                    | <i>Crassostrea gigas</i>      | HQ661003 | Rongcheng, Shandong province, China  |
|           |           |                    | <i>Crassostrea gigas</i>      | HQ661004 | Qingdao, Shandong province, China    |
|           |           |                    | <i>Crassostrea gigas</i>      | HQ661005 | Yantai, Shandong province, China     |
|           |           |                    | <i>Crassostrea gigas</i>      | HQ661006 | Lianyungang, Jiangsu province, China |

|                                  |          |                                      |
|----------------------------------|----------|--------------------------------------|
| <i>Crassostrea gigas</i>         | HQ661007 | Lianyungang, Jiangsu province, China |
| <i>Crassostrea gigas</i>         | AB636176 | Japan                                |
| <i>Crassostrea gigas</i>         | AB636174 | Japan                                |
| <i>Crassostrea gigas</i>         | AB636172 | Japan                                |
| <i>Crassostrea gigas</i>         | AB636169 | Japan                                |
| <i>Crassostrea gigas</i>         | AB636184 | Japan                                |
| <i>Crassostrea gigas</i>         | AB636183 | Japan                                |
| <i>Crassostrea gigas</i>         | AB636182 | Japan                                |
| <i>Crassostrea gigas</i>         | AB636181 | Japan                                |
| <i>Crassostrea gigas</i>         | AB636178 | Japan                                |
| <i>Crassostrea gigas</i>         | AB636171 | Japan                                |
| <i>Crassostrea gigas</i>         | AB636167 | Japan                                |
| <i>Crassostrea gigas</i>         | AB636166 | Japan                                |
| <i>Crassostrea gigas</i>         | AB904884 | Kagoshima, Japan                     |
| <i>Crassostrea gigas</i>         | AB904889 | Kagoshima, Japan                     |
| <i>Crassostrea gigas</i>         | KJ855241 | Komaru, Japan                        |
| <i>Crassostrea hongkongensis</i> | FJ593172 | Beihai, Guangxi Province, China      |
| <i>Crassostrea hongkongensis</i> | EU118008 | China                                |
| <i>Crassostrea hongkongensis</i> | EU672834 | Haikou, Hainan province, China       |
| <i>Crassostrea hongkongensis</i> | FJ593173 | Xiamen, Fujian province, China       |
| <i>Crassostrea iredalei</i>      | HQ661022 | Sanya, Hainan province, China        |
| <i>Crassostrea iredalei</i>      | HQ661023 | Sanya, Hainan province, China        |
| <i>Crassostrea sikamea</i>       | HQ661010 | Shengsi, Zhejiang province, China    |
| <i>Crassostrea sikamea</i>       | HQ661011 | Fuqing, Fujian province, China       |
| <i>Crassostrea sikamea</i>       | HQ661012 | Fuqing, Fujian province, China       |
| <i>Crassostrea sikamea</i>       | HQ661013 | Beibhai, Guangxi province, China     |
| <i>Crassostrea sikamea</i>       | HQ661014 | Beibhai, Guangxi province, China     |

|               |                            |          |                                      |
|---------------|----------------------------|----------|--------------------------------------|
|               | <i>Crassostrea sikamea</i> | HQ661015 | Beibhai, Guangxi province, China     |
|               | <i>Crassostrea sikamea</i> | HQ661016 | Wenchang, Hainan province, China     |
|               | <i>Crassostrea sikamea</i> | HQ661017 | Nantong, Jiangsu province, China     |
|               | <i>Crassostrea sikamea</i> | HQ661018 | Nantong, Jiangsu province, China     |
|               | <i>Crassostrea sikamea</i> | HQ661019 | Yangjiang, Guangdong province, China |
|               | <i>Crassostrea sikamea</i> | AB904872 | Wakayama, Japan                      |
|               | <i>Crassostrea sikamea</i> | AB904873 | Wakayama, Japan                      |
|               | <i>Crassostrea sikamea</i> | AB904874 | Wakayama, Japan                      |
|               | <i>Crassostrea sikamea</i> | AB904875 | Wakayama, Japan                      |
|               | <i>Crassostrea sikamea</i> | AB904876 | Wakayama, Japan                      |
|               | <i>Crassostrea sikamea</i> | AB904877 | Wakayama, Japan                      |
|               | <i>Crassostrea sikamea</i> | AB904878 | Wakayama, Japan                      |
|               | <i>Crassostrea sikamea</i> | AB675954 | Oita, Japan                          |
|               | <i>Crassostrea sikamea</i> | AB675952 | Oita, Japan                          |
|               | <i>Crassostrea sikamea</i> | AB675950 | Oita, Japan                          |
|               | <i>Crassostrea sikamea</i> | AB675948 | Oita, Japan                          |
|               | <i>Crassostrea sikamea</i> | AB675955 | Oita, Japan                          |
|               | <i>Crassostrea sikamea</i> | AB675953 | Oita, Japan                          |
|               | <i>Crassostrea sikamea</i> | AB675951 | Oita, Japan                          |
|               | <i>Crassostrea sikamea</i> | AB675949 | Oita, Japan                          |
|               | <i>Crassostrea sikamea</i> | AB675947 | Oita, Japan                          |
| <i>Ostrea</i> | <i>Ostrea stentina</i>     | LC051588 | Kagoshima, Ibusuki, Japan            |
|               | <i>Ostrea stentina</i>     | LC051586 | Kagoshima, Ibusuki, Japan            |
|               | <i>Ostrea stentina</i>     | LC051585 | Kagoshima, Ibusuki, Japan            |
|               | <i>Ostrea stentina</i>     | LC051589 | Kagoshima, Ibusuki, Japan            |
|               | <i>Ostrea stentina</i>     | LC051591 | Kagoshima, Ibusuki, Japan            |
|               | <i>Ostrea stentina</i>     | LC051587 | Kagoshima, Ibusuki, Japan            |
|               | <i>Ostrea stentina</i>     | LC051590 | Kagoshima, Ibusuki, Japan            |
|               | <i>Ostrea stentina</i>     | LC051583 | Wakayama, Kemi, Japan                |
|               | <i>Ostrea stentina</i>     | LC051584 | Wakayama, Kemi, Japan                |
|               | <i>Ostrea stentina</i>     | LC051582 | Wakayama, Kemi, Japan                |

|                            |            |                             |                               |                             |                                         |                                    |
|----------------------------|------------|-----------------------------|-------------------------------|-----------------------------|-----------------------------------------|------------------------------------|
| Pectinoida                 | Pectinidae | <i>Saccostrea</i>           | <i>Saccostrea mordax</i>      | HQ661025                    | Sanya, Hainan province, China           |                                    |
|                            |            |                             | <i>Saccostrea mordax</i>      | HQ661026                    | Sanya, Hainan province, China           |                                    |
|                            |            |                             | <i>Saccostrea mordax</i>      | HQ661027                    | Sanya, Hainan province, China           |                                    |
|                            |            |                             | <i>Saccostrea mordax</i>      | HQ661028                    | Sanya, Hainan province, China           |                                    |
|                            |            |                             | <i>Saccostrea mordax</i>      | HQ661029                    | Weizhou Island, Guangxi province, China |                                    |
|                            |            | <i>Amusium</i>              | <i>Amusium pleuronectes</i>   | GU120012                    | Lingao, Hainan province, China          |                                    |
|                            |            |                             | <i>Amusium pleuronectes</i>   | GU120013                    | Lingao, Hainan province, China          |                                    |
|                            |            |                             | <i>Amusium pleuronectes</i>   | GU120014                    | Lingao, Hainan province, China          |                                    |
|                            |            |                             | <i>Amusium pleuronectes</i>   | GU120015                    | Lingao, Hainan province, China          |                                    |
|                            |            |                             | <i>Amusium pleuronectes</i>   | GU120016                    | Lingao, Hainan province, China          |                                    |
|                            |            |                             | <i>Amusium pleuronectes</i>   | GU120017                    | Lingao, Hainan province, China          |                                    |
|                            |            |                             | <i>Amusium pleuronectes</i>   | GU120018                    | Lingao, Hainan province, China          |                                    |
|                            |            |                             | <i>Amusium pleuronectes</i>   | GU120019                    | Lingao, Hainan province, China          |                                    |
|                            |            |                             | <i>Argopecten</i>             | <i>Argopecten irradians</i> | GU120020                                | Zhoushan, Zhejiang province, China |
|                            |            |                             |                               | <i>Argopecten irradians</i> | GU120021                                | Zhoushan, Zhejiang province, China |
|                            |            |                             |                               | <i>Argopecten irradians</i> | GU120022                                | Zhoushan, Zhejiang province, China |
|                            |            |                             |                               | <i>Argopecten irradians</i> | GU120023                                | Zhoushan, Zhejiang province, China |
|                            |            | <i>Argopecten irradians</i> |                               | GU120024                    | Beibhai, Guangxi province, China        |                                    |
|                            |            | <i>Chlamys</i>              | <i>Chlamys farreri</i>        | GU119998                    | Dalian, Liaoning province, China        |                                    |
|                            |            |                             | <i>Chlamys farreri</i>        | GU119999                    | Dalian, Liaoning province, China        |                                    |
|                            |            |                             | <i>Chlamys farreri</i>        | GU120000                    | Dalian, Liaoning province, China        |                                    |
|                            |            |                             | <i>Chlamys farreri</i>        | FJ595957                    | Qingdao, Shandong province, China       |                                    |
|                            |            | <i>Decatopecten</i>         | <i>Decatopecten pilica</i>    | GU120026                    | Beibhai, Guangxi province, China        |                                    |
|                            |            |                             | <i>Decatopecten pilica</i>    | GU120027                    | Beibhai, Guangxi province, China        |                                    |
|                            |            |                             | <i>Decatopecten pilica</i>    | GU120029                    | Beibhai, Guangxi province, China        |                                    |
|                            |            |                             | <i>Decatopecten pilica</i>    | GU120030                    | Beibhai, Guangxi province, China        |                                    |
|                            |            | <i>Mimachlamys</i>          | <i>Mimachlamys nobilis</i>    | GU119985                    | Sanya, Hainan province, China           |                                    |
| <i>Mimachlamys nobilis</i> | GU119986   |                             | Sanya, Hainan province, China |                             |                                         |                                    |
| <i>Mimachlamys nobilis</i> | GU119987   |                             | Sanya, Hainan province, China |                             |                                         |                                    |
| <i>Mimachlamys nobilis</i> | GU119988   |                             | Sanya, Hainan province, China |                             |                                         |                                    |

|           |               |                     |                                |          |                                          |
|-----------|---------------|---------------------|--------------------------------|----------|------------------------------------------|
|           |               |                     | <i>Mimachlamys nobilis</i>     | GU119989 | Sanya, Hainan province, China            |
|           |               | <i>Mizuhopecten</i> | <i>Mizuhopecten yessoensis</i> | GU119990 | Weihai, Shandong province, China         |
|           |               |                     | <i>Mizuhopecten yessoensis</i> | GU119991 | Weihai, Shandong province, China         |
|           |               |                     | <i>Mizuhopecten yessoensis</i> | GU119992 | Weihai, Shandong province, China         |
|           |               |                     | <i>Mizuhopecten yessoensis</i> | GU119993 | Weihai, Shandong province, China         |
|           |               |                     | <i>Mizuhopecten yessoensis</i> | GU119994 | Changdao, Shandong province, China       |
|           |               |                     | <i>Mizuhopecten yessoensis</i> | GU119995 | Dalian, Liaoning province, China         |
|           |               |                     | <i>Mizuhopecten yessoensis</i> | GU119996 | Dalian, Liaoning province, China         |
|           |               |                     | <i>Mizuhopecten yessoensis</i> | GU119997 | Dalian, Liaoning province, China         |
|           |               | <i>Volachlamys</i>  | <i>Volachlamys hirasei</i>     | GU120001 | Panjin, Liaoning province, China         |
|           |               |                     | <i>Volachlamys hirasei</i>     | GU120002 | Panjin, Liaoning province, China         |
|           |               |                     | <i>Volachlamys hirasei</i>     | GU120003 | Panjin, Liaoning province, China         |
|           |               |                     | <i>Volachlamys hirasei</i>     | GU120004 | Panjin, Liaoning province, China         |
|           |               |                     | <i>Volachlamys hirasei</i>     | GU120005 | Panjin, Liaoning province, China         |
|           |               |                     | <i>Volachlamys hirasei</i>     | GU120006 | Panjin, Liaoning province, China         |
|           |               |                     | <i>Volachlamys hirasei</i>     | GU120007 | Panjin, Liaoning province, China         |
|           |               |                     | <i>Volachlamys hirasei</i>     | GU120008 | Panjin, Liaoning province, China         |
|           |               |                     | <i>Volachlamys hirasei</i>     | GU120009 | Panjin, Liaoning province, China         |
|           |               |                     | <i>Volachlamys hirasei</i>     | GU120010 | Panjin, Liaoning province, China         |
| Pterioida | Isognomonidae | <i>Isognomon</i>    | <i>Isognomon acutirostris</i>  | AB076926 | Okinawa, Iriomote Island, Okinawa, Japan |
|           |               |                     | <i>Isognomon ephippium</i>     | KU341971 | Shenzhen, Guangdong province, China      |
|           |               |                     | <i>Isognomon ephippium</i>     | KU341972 | Shenzhen, Guangdong province, China      |
|           |               |                     | <i>Isognomon ephippium</i>     | KU341973 | Shenzhen, Guangdong province, China      |
|           |               |                     | <i>Isognomon ephippium</i>     | KU341974 | Shenzhen, Guangdong province, China      |
|           |               |                     | <i>Isognomon ephippium</i>     | KU341975 | Shenzhen, Guangdong province, China      |
|           |               |                     | <i>Isognomon legumen</i>       | KU341965 | Weizhou Island, Guangxi province, China  |
|           |               |                     | <i>Isognomon legumen</i>       | KU341966 | Weizhou Island, Guangxi province, China  |
|           |               |                     | <i>Isognomon legumen</i>       | KU341967 | Shenzhen, Guangdong province, China      |
|           |               |                     | <i>Isognomon legumen</i>       | KU341968 | Shenzhen, Guangdong province, China      |
|           |               |                     | <i>Isognomon legumen</i>       | KU341969 | Shenzhen, Guangdong province, China      |
|           |               |                     | <i>Isognomon nucleus</i>       | KU341970 | Lingao, Hainan province, China           |



|           |                 |                               |          |                                           |
|-----------|-----------------|-------------------------------|----------|-------------------------------------------|
|           |                 | <i>Isognomon perna</i>        | KU341963 | Sanya, Hainan province, China             |
|           |                 | <i>Isognomon perna</i>        | KU341964 | Sanya, Hainan province, China             |
|           |                 | <i>Isognomon perna</i>        | AB076918 | Okinawa, Gushikami, Okinawa, Japan        |
| Pinnidae  | <i>Atrina</i>   | <i>Atrina pectinata</i>       | AB059421 | Ariake Bay, Japan                         |
|           |                 | <i>Atrina pectinata</i>       | AB059422 | Ariake Bay, Japan                         |
|           |                 | <i>Atrina pectinata</i>       | AB059423 | Yamaguchi, Ohmi Bay, Japan                |
|           |                 | <i>Atrina pectinata</i>       | AB059424 | Yamaguchi, Ohmi Bay, Japan                |
|           |                 | <i>Atrina pectinata</i>       | AB076914 | Kanagawa, Yokohama, Central market, Japan |
| Pteriidae | <i>Pinctada</i> | <i>Pinctada albina</i>        | AB261165 | Kagoshima, Japan                          |
|           |                 | <i>Pinctada chemnitzii</i>    | KU341955 | Pingtang, Fujian province, China          |
|           |                 | <i>Pinctada chemnitzii</i>    | KU341956 | Haikou, Hainan province, China            |
|           |                 | <i>Pinctada chemnitzii</i>    | KU341957 | Caotan, Guangdong province, China         |
|           |                 | <i>Pinctada chemnitzii</i>    | KU341958 | Shankou, Guangxi province, China          |
|           |                 | <i>Pinctada fucata</i>        | KU341939 | Beibhai, Guangxi province, China          |
|           |                 | <i>Pinctada fucata</i>        | KU341940 | Beibhai, Guangxi province, China          |
|           |                 | <i>Pinctada fucata</i>        | KU341941 | Beibhai, Guangxi province, China          |
|           |                 | <i>Pinctada fucata</i>        | KU341942 | Beibhai, Guangxi province, China          |
|           |                 | <i>Pinctada fucata</i>        | KU341943 | Beibhai, Guangxi province, China          |
|           |                 | <i>Pinctada fucata</i>        | KU341944 | Wenchang, Hainan province, China          |
|           |                 | <i>Pinctada fucata</i>        | GQ355871 | Japan                                     |
|           |                 | <i>Pinctada margaritifera</i> | KU341945 | Beibhai, Guangxi province, China          |
|           |                 | <i>Pinctada margaritifera</i> | KU341946 | Beibhai, Guangxi province, China          |
|           |                 | <i>Pinctada margaritifera</i> | KU341947 | Beibhai, Guangxi province, China          |
|           |                 | <i>Pinctada margaritifera</i> | KU341948 | Beibhai, Guangxi province, China          |
|           |                 | <i>Pinctada margaritifera</i> | KU341949 | Weizhou Island, Guangxi province, China   |
|           |                 | <i>Pinctada margaritifera</i> | KU341950 | Weizhou Island, Guangxi province, China   |
|           |                 | <i>Pinctada margaritifera</i> | KU341951 | Weizhou Island, Guangxi province, China   |
|           |                 | <i>Pinctada margaritifera</i> | KU341952 | Weizhou Island, Guangxi province, China   |
|           |                 | <i>Pinctada margaritifera</i> | KU341953 | Weizhou Island, Guangxi province, China   |
|           |                 | <i>Pinctada margaritifera</i> | KU341954 | Weizhou Island, Guangxi province, China   |
|           |                 | <i>Pinctada margaritifera</i> | AB259166 | Okinawa, Okinawa, Japan                   |

|                           |                            |                               |                                   |                                  |                                         |                                  |
|---------------------------|----------------------------|-------------------------------|-----------------------------------|----------------------------------|-----------------------------------------|----------------------------------|
|                           |                            |                               | <i>Pinctada martensi</i>          | GQ355882                         | Japan                                   |                                  |
|                           |                            |                               | <i>Pinctada martensi</i>          | AB076915                         | Kanagawa, Manazuru, Siraiso, Japan      |                                  |
|                           |                            |                               | <i>Pinctada maxima</i>            | KU341937                         | Weizhou Island, Guangxi province, China |                                  |
|                           |                            |                               | <i>Pinctada maxima</i>            | KU341938                         | Hainan province, China                  |                                  |
| Veneroida                 | Cardiidae                  | <i>Clinocardium</i>           | <i>Clinocardium californiense</i> | JN860022                         | Dalian, Liaoning province, China        |                                  |
|                           |                            |                               | <i>Clinocardium californiense</i> | JN860023                         | Qingdao, Shandong province, China       |                                  |
|                           |                            |                               | <i>Clinocardium californiense</i> | JN860024                         | Dalian, Liaoning province, China        |                                  |
|                           |                            |                               | <i>Clinocardium californiense</i> | JN860025                         | Wenchang, Hainan province, China        |                                  |
|                           |                            |                               | <i>Clinocardium californiense</i> | JN860026                         | Beibhai, Guangxi province, China        |                                  |
|                           |                            |                               | <i>Clinocardium californiense</i> | JN860027                         | Rongcheng, Shandong province, China     |                                  |
|                           |                            |                               | <i>Vasticardium</i>               | <i>Vasticardium flavum</i>       | JN860016                                | Lingshui, Hainan province, China |
|                           |                            |                               |                                   | <i>Vasticardium flavum</i>       | JN860017                                | Lingshui, Hainan province, China |
|                           |                            |                               |                                   | <i>Vasticardium flavum</i>       | JN860018                                | Sanya, Hainan province, China    |
|                           |                            |                               |                                   | <i>Vasticardium flavum</i>       | JN860019                                | Lingao, Hainan province, China   |
|                           | <i>Vasticardium flavum</i> | JN860020                      |                                   | Wenchang, Hainan province, China |                                         |                                  |
|                           | <i>Vasticardium flavum</i> | JN860021                      |                                   | Lingao, Hainan province, China   |                                         |                                  |
|                           | <i>Vepricardium</i>        | <i>Vepricardium coronatum</i> | JN860013                          | Sanya, Hainan province, China    |                                         |                                  |
|                           |                            | <i>Vepricardium coronatum</i> | JN860014                          | Sanya, Hainan province, China    |                                         |                                  |
|                           |                            | <i>Vepricardium coronatum</i> | JN860015                          | Sanya, Hainan province, China    |                                         |                                  |
|                           | Corbiculidae               | <i>Corbicula</i>              | <i>Corbicula fluminea</i>         | KC211267                         | Japan                                   |                                  |
|                           |                            |                               | <i>Corbicula fluminea</i>         | KC211281                         | Japan                                   |                                  |
|                           |                            |                               | <i>Corbicula fluminea</i>         | KC211282                         | Japan                                   |                                  |
| <i>Corbicula fluminea</i> |                            |                               | KC211283                          | Japan                            |                                         |                                  |
| <i>Corbicula fluminea</i> |                            |                               | KC211285                          | Japan                            |                                         |                                  |
| <i>Corbicula fluminea</i> |                            |                               | KC211286                          | Japan                            |                                         |                                  |

|                           |          |                                       |
|---------------------------|----------|---------------------------------------|
| <i>Corbicula japonica</i> | AB498808 | Niigata, Japan                        |
| <i>Corbicula japonica</i> | AB498018 | Ibaraki, Japan                        |
| <i>Corbicula japonica</i> | AB845593 | Fukuoka, Fukuoka, Zuibaiji Riv, Japan |
| <i>Corbicula japonica</i> | AB971384 | Japan                                 |
| <i>Corbicula japonica</i> | AB971385 | Japan                                 |
| <i>Corbicula japonica</i> | AB971386 | Japan                                 |
| <i>Corbicula japonica</i> | AB971387 | Japan                                 |
| <i>Corbicula japonica</i> | AB971388 | Japan                                 |
| <i>Corbicula japonica</i> | AB971389 | Japan                                 |
| <i>Corbicula japonica</i> | AB971390 | Japan                                 |
| <i>Corbicula japonica</i> | AB971391 | Japan                                 |
| <i>Corbicula japonica</i> | AB971392 | Japan                                 |
| <i>Corbicula japonica</i> | AB971393 | Japan                                 |
| <i>Corbicula japonica</i> | AB971394 | Japan                                 |
| <i>Corbicula japonica</i> | AB971395 | Japan                                 |
| <i>Corbicula japonica</i> | AB971396 | Japan                                 |
| <i>Corbicula japonica</i> | AB971397 | Japan                                 |
| <i>Corbicula japonica</i> | AB971398 | Japan                                 |
| <i>Corbicula japonica</i> | AB971399 | Japan                                 |
| <i>Corbicula japonica</i> | AB971400 | Japan                                 |
| <i>Corbicula japonica</i> | AB971401 | Japan                                 |
| <i>Corbicula japonica</i> | AB971402 | Japan                                 |
| <i>Corbicula japonica</i> | AB971403 | Japan                                 |
| <i>Corbicula japonica</i> | AB971404 | Japan                                 |
| <i>Corbicula japonica</i> | AB971405 | Japan                                 |
| <i>Corbicula japonica</i> | AB971406 | Japan                                 |
| <i>Corbicula japonica</i> | AB971407 | Japan                                 |
| <i>Corbicula japonica</i> | AB971408 | Japan                                 |
| <i>Corbicula japonica</i> | KC211253 | Japan                                 |
| <i>Corbicula japonica</i> | KC211252 | Japan                                 |
| <i>Corbicula japonica</i> | KC211254 | Japan                                 |

|             |                  |                             |          |                                          |
|-------------|------------------|-----------------------------|----------|------------------------------------------|
|             |                  | <i>Corbicula japonica</i>   | KC211255 | Japan                                    |
|             |                  | <i>Corbicula japonica</i>   | KC211256 | Japan                                    |
|             |                  | <i>Corbicula japonica</i>   | KC211257 | Japan                                    |
|             |                  | <i>Corbicula japonica</i>   | KC211258 | Japan                                    |
|             |                  | <i>Corbicula japonica</i>   | KC211259 | Japan                                    |
|             |                  | <i>Corbicula japonica</i>   | KC211271 | Japan                                    |
|             |                  | <i>Corbicula japonica</i>   | KC211272 | Japan                                    |
|             |                  | <i>Corbicula japonica</i>   | KC211273 | Japan                                    |
|             |                  | <i>Corbicula japonica</i>   | KC211274 | Japan                                    |
|             |                  | <i>Corbicula japonica</i>   | KC211275 | Japan                                    |
|             |                  | <i>Corbicula japonica</i>   | KC211276 | Japan                                    |
|             |                  | <i>Corbicula leana</i>      | KC211268 | Japan                                    |
|             |                  | <i>Corbicula leana</i>      | KC211269 | Japan                                    |
|             |                  | <i>Corbicula leana</i>      | KC211270 | Japan                                    |
|             |                  | <i>Corbicula leana</i>      | KC211287 | Japan                                    |
|             |                  | <i>Corbicula leana</i>      | KC211288 | Japan                                    |
|             |                  | <i>Corbicula leana</i>      | KC211289 | Japan                                    |
|             |                  | <i>Corbicula leana</i>      | AB498810 | Fukuoka, Chikugo River, Japan            |
|             |                  | <i>Corbicula leana</i>      | AB845591 | Hyogo, minami-awaji, Hatsuo Riv, Japan   |
|             |                  | <i>Corbicula sandai</i>     | AB845590 | Shiga, Hikone, Lake Biwa, Japan          |
|             |                  | <i>Corbicula sandai</i>     | KC211277 | Japan                                    |
|             |                  | <i>Corbicula sandai</i>     | KC211278 | Japan                                    |
|             |                  | <i>Corbicula sandai</i>     | KC211279 | Japan                                    |
|             |                  | <i>Corbicula sandai</i>     | KC211280 | Japan                                    |
|             |                  | <i>Corbicula sandai</i>     | AB498811 | Shiga, Lake Biwa, Japan                  |
|             | <i>Geloina</i>   | <i>Geloina erosa</i>        | AB076927 | Okinawa, Iriomote, Okinawa, Japan        |
|             |                  | <i>Geloina expansa</i>      | AB498812 | Okinawa, Iriomote Island, Okinawa, Japan |
| Cultellidae | <i>Cultellus</i> | <i>Cultellus attenuatus</i> | JN859998 | Shengsi, Zhejiang province, China        |
|             |                  | <i>Cultellus attenuatus</i> | JN859999 | Qingdao, Shandong province, China        |
|             |                  | <i>Cultellus attenuatus</i> | JN860000 | Changzhou, Fujian province, China        |
|             |                  | <i>Cultellus attenuatus</i> | JN860001 | Qingdao, Shandong province, China        |

|                         |                   |                             |          |                                        |
|-------------------------|-------------------|-----------------------------|----------|----------------------------------------|
| Donacidae               | <i>Donax</i>      | <i>Donax dysoni</i>         | JN859976 | Wenchang, Hainan province, China       |
|                         |                   | <i>Donax dysoni</i>         | JN859977 | Wenchang, Hainan province, China       |
|                         |                   | <i>Donax dysoni</i>         | JN859978 | Beibhai, Guangxi province, China       |
|                         |                   | <i>Donax dysoni</i>         | JN859979 | Beibhai, Guangxi province, China       |
|                         |                   | <i>Donax dysoni</i>         | JN859980 | Wenchang, Hainan province, China       |
|                         |                   | <i>Donax dysoni</i>         | JN859981 | Fangchenggang, Guangxi province, China |
| Mactridae               | <i>Coelomacra</i> | <i>Coelomacra antiquata</i> | JN674607 | Changzhou, Fujian province, China      |
|                         |                   | <i>Coelomacra antiquata</i> | JN674608 | Pingtang, Fujian province, China       |
|                         |                   | <i>Coelomacra antiquata</i> | JN674609 | Lianyungang, Jiangsu province, China   |
|                         | <i>Lutraria</i>   | <i>Lutraria arcuata</i>     | JN674601 | Beibhai, Guangxi province, China       |
|                         |                   | <i>Lutraria arcuata</i>     | JN674602 | Changzhou, Fujian province, China      |
|                         |                   | <i>Lutraria arcuata</i>     | JN674603 | Beibhai, Guangxi province, China       |
|                         |                   | <i>Lutraria australis</i>   | JN674600 | Beibhai, Guangxi province, China       |
|                         | <i>Mactra</i>     | <i>Mactra alta</i>          | JN674615 | Beibhai, Guangxi province, China       |
|                         |                   | <i>Mactra alta</i>          | JN674616 | Beibhai, Guangxi province, China       |
|                         |                   | <i>Mactra alta</i>          | JN674617 | Beibhai, Guangxi province, China       |
|                         |                   | <i>Mactra alta</i>          | JN674618 | Beibhai, Guangxi province, China       |
|                         |                   | <i>Mactra alta</i>          | JN674619 | Beibhai, Guangxi province, China       |
|                         |                   | <i>Mactra alta</i>          | JN674620 | Beibhai, Guangxi province, China       |
|                         |                   | <i>Mactra chinensis</i>     | JN674630 | Pingtang, Fujian province, China       |
|                         |                   | <i>Mactra chinensis</i>     | JN674631 | Lianyungang, Jiangsu province, China   |
|                         |                   | <i>Mactra chinensis</i>     | JN674632 | Wendeng, Shandong province, China      |
|                         |                   | <i>Mactra chinensis</i>     | JN674633 | Qinhuangdao, Hebei province, China     |
|                         |                   | <i>Mactra chinensis</i>     | JN674634 | Dandong, Liaoning province, China      |
|                         |                   | <i>Mactra chinensis</i>     | JN674635 | Nanji, Zhejiang province, China        |
|                         |                   | <i>Mactra chinensis</i>     | KC205870 | China                                  |
| <i>Mactra chinensis</i> | KC205871          | China                       |          |                                        |
| <i>Mactra chinensis</i> | KC205872          | China                       |          |                                        |
| <i>Mactra chinensis</i> | KC205873          | China                       |          |                                        |
| <i>Mactra chinensis</i> | KC205874          | China                       |          |                                        |
| <i>Mactra chinensis</i> | KC205875          | China                       |          |                                        |

|          |                      |                                    |          |                                      |
|----------|----------------------|------------------------------------|----------|--------------------------------------|
|          |                      | <i>Mactra chinensis</i>            | KC205876 | China                                |
|          |                      | <i>Mactra chinensis</i>            | KC205877 | China                                |
|          |                      | <i>Mactra maublata</i>             | JN674613 | Wenchang, Hainan province, China     |
|          |                      | <i>Mactra maublata</i>             | JN674614 | Wenchang, Hainan province, China     |
|          |                      | <i>Mactra veneriformis</i>         | JN674621 | Lianyungang, Jiangsu province, China |
|          |                      | <i>Mactra veneriformis</i>         | JN674622 | Zhoushan, Zhejiang province, China   |
|          |                      | <i>Mactra veneriformis</i>         | JN674623 | Beibhai, Guangxi province, China     |
|          |                      | <i>Mactra veneriformis</i>         | JN674624 | Dalian, Liaoning province, China     |
|          |                      | <i>Mactra veneriformis</i>         | JN674625 | Dongying, Shandong province, China   |
|          |                      | <i>Mactra veneriformis</i>         | GQ864250 | Lianyungang, Jiangsu province, China |
|          |                      | <i>Mactra veneriformis</i>         | FJ851355 | Qidong, Jiangsu province, China      |
|          |                      | <i>Mactra veneriformis</i>         | GQ864249 | Lianyungang, Jiangsu province, China |
|          |                      | <i>Mactra veneriformis</i>         | GQ864248 | Lianyungang, Jiangsu province, China |
|          |                      | <i>Mactra veneriformis</i>         | GQ864247 | Lianyungang, Jiangsu province, China |
|          |                      | <i>Mactra veneriformis</i>         | GQ864246 | Lianyungang, Jiangsu province, China |
|          |                      | <i>Mactra veneriformis</i>         | GQ864245 | Lianyungang, Jiangsu province, China |
|          |                      | <i>Mactra veneriformis</i>         | GQ864244 | Lianyungang, Jiangsu province, China |
|          |                      | <i>Mactra veneriformis</i>         | GQ864243 | Lianyungang, Jiangsu province, China |
|          |                      | <i>Mactra veneriformis</i>         | GQ864242 | Lianyungang, Jiangsu province, China |
|          |                      | <i>Mactra veneriformis</i>         | GQ864241 | Lianyungang, Jiangsu province, China |
|          |                      | <i>Mactra veneriformis</i>         | GQ864240 | Lianyungang, Jiangsu province, China |
|          |                      | <i>Mactra veneriformis</i>         | GQ864239 | Lianyungang, Jiangsu province, China |
|          |                      | <i>Mactra veneriformis</i>         | GQ864238 | Lianyungang, Jiangsu province, China |
|          |                      | <i>Mactra cumingii</i>             | JN674610 | Sanya, Hainan province, China        |
|          |                      | <i>Mactra cumingii</i>             | JN674611 | Sanya, Hainan province, China        |
|          |                      | <i>Mactra cumingii</i>             | JN674612 | Sanya, Hainan province, China        |
|          | <i>Pseudocardium</i> | <i>Pseudocardium sachalinensis</i> | JN674604 | Beibhai, Guangxi province, China     |
|          |                      | <i>Pseudocardium sachalinensis</i> | JN674605 | Beibhai, Guangxi province, China     |
| Pharidae | <i>Siliqua</i>       | <i>Siliqua radiata</i>             | JN860002 | Changzhou, Fujian province, China    |

|              |                      |                                |          |                                        |
|--------------|----------------------|--------------------------------|----------|----------------------------------------|
|              |                      | <i>Siliqua radiata</i>         | JN860003 | Changzhou, Fujian province, China      |
|              |                      | <i>Siliqua radiata</i>         | JN860004 | Changzhou, Fujian province, China      |
|              |                      | <i>Siliqua radiata</i>         | JN860005 | Changzhou, Fujian province, China      |
| Psammobiidae | <i>Sanguinolaria</i> | <i>Sanguinolaria tchangsii</i> | JN859945 | Lingao, Hainan province, China         |
|              |                      | <i>Sanguinolaria tchangsii</i> | JN859947 | Lingao, Hainan province, China         |
|              | <i>Nuttallia</i>     | <i>Nuttallia olivacea</i>      | JN859954 | NanjiZhejiang, ProvinceChina           |
|              |                      | <i>Nuttallia olivacea</i>      | JN859955 | NanjiZhejiang, ProvinceChina           |
|              | <i>Soletellina</i>   | <i>Soletellina virescens</i>   | JN859943 | Beihai, Guangxi province, China        |
|              |                      | <i>Soletellina diphos</i>      | JN859948 | Lingao, Hainan province, China         |
|              | <i>Psammotaea</i>    | <i>Psammotaea elongata</i>     | JN859936 | Beihai, Guangxi Province, China        |
|              |                      | <i>Psammotaea elongata</i>     | JN859938 | Beihai, Guangxi province, China        |
|              |                      | <i>Psammotaea elongata</i>     | JN859940 | Wenchang, Hainan province, China       |
|              |                      | <i>Psammotaea elongata</i>     | JN859941 | Beihai, Guangxi province, China        |
| Semelidae    | <i>Semele</i>        | <i>Semele cf amabilis</i>      | JN859975 | Lingao, Hainan province, China         |
|              |                      | <i>Semele scaba</i>            | JN859973 | Lingshui, Hainan province, China       |
|              |                      | <i>Semele scaba</i>            | JN859974 | Lingshui, Hainan province, China       |
| Solecurtidae | <i>Sinonovacula</i>  | <i>Sinonovacula constricta</i> | JN859986 | Beibhai, Guangxi province, China       |
|              |                      | <i>Sinonovacula constricta</i> | JN859987 | Lianyungang, Jiangsu province, China   |
|              |                      | <i>Sinonovacula constricta</i> | JN859988 | Panjin, Liaoning province, China       |
|              |                      | <i>Sinonovacula constricta</i> | JN859989 | Xiapu, Fujian province, China          |
|              |                      | <i>Sinonovacula constricta</i> | JN859991 | Shantou, Guangdong province, China     |
|              |                      | <i>Sinonovacula constricta</i> | JN859993 | Zhoushan, Zhejiang province, China     |
|              |                      | <i>Sinonovacula constricta</i> | HM180885 | Korea                                  |
|              |                      | <i>Sinonovacula constricta</i> | HM180886 | Korea                                  |
| Solenidae    | <i>Solecurtus</i>    | <i>Solecurtus divaricatus</i>  | JN859983 | Yangjiang, Guangdong province, China   |
|              | <i>Solen</i>         | <i>Solen grandis</i>           | JN860010 | Changzhou, Fujian province, China      |
|              |                      | <i>Solen grandis</i>           | JN860011 | Qingdao, Shandong province, China      |
|              |                      | <i>Solen grandis</i>           | JN860012 | Fenshui, Shandong province, China      |
|              |                      | <i>Solen strictus</i>          | JN860006 | Fangchenggang, Guangxi province, China |
|              |                      | <i>Solen strictus</i>          | JN860007 | Beibhai, Guangxi province, China       |
|              |                      | <i>Solen strictus</i>          | JN860008 | Dandong, Liaoning province, China      |

|                               |                                |                                |                            |                                        |                                     |
|-------------------------------|--------------------------------|--------------------------------|----------------------------|----------------------------------------|-------------------------------------|
| Tellinidae                    | <i>Macoma</i>                  | <i>Solen strictus</i>          | JN860009                   | Weihai, Shandong province, China       |                                     |
|                               |                                | <i>Macoma candida</i>          | JN859965                   | Beibhai, Guangxi province, China       |                                     |
|                               |                                | <i>Macoma tokyoensis</i>       | JN859962                   | Rongcheng, Shandong province, China    |                                     |
|                               |                                |                                | <i>Macoma tokyoensis</i>   | JN859963                               | Rongcheng, Shandong province, China |
|                               | <i>Moerella</i>                | <i>Moerella iridescens</i>     | JN859970                   | Beihai, Guangxi province, China        |                                     |
|                               | <i>Serratina</i>               | <i>Serratina capsoides</i>     | AB691950                   | Fukuoka, Imazu bay, Japan              |                                     |
|                               |                                | <i>Serratina capsoides</i>     | AB691949                   | Kumamoto, Yokaku-bay, Japan            |                                     |
|                               |                                | <i>Serratina capsoides</i>     | AB691948                   | Mie, Japan                             |                                     |
|                               |                                | <i>Serratina capsoides</i>     | AB691947                   | Okinawa, Sashiki, Okinawa, Japan       |                                     |
|                               |                                | <i>Serratina capsoides</i>     | AB691946                   | Kagoshima Pref, Amami-Oshima, Japan    |                                     |
|                               |                                | <i>Serratina capsoides</i>     | AB691945                   | Okinawa, Haneji-Naikai, Okinawa, Japan |                                     |
|                               |                                | <i>Serratina capsoides</i>     | JN859959                   | Beibhai, Guangxi province, China       |                                     |
|                               | Veneridae                      | <i>Anomalocardia</i>           | <i>Serratina capsoides</i> | JN859960                               | Beibhai, Guangxi province, China    |
| <i>Anomalocardia producta</i> |                                |                                | HQ703052                   | Wenchang, Hainan province, China       |                                     |
| <i>Anomalocardia producta</i> |                                |                                | HQ703053                   | Wenchang, Hainan province, China       |                                     |
| <i>Anomalocardia producta</i> |                                |                                | HQ703054                   | Beibhai, Guangxi province, China       |                                     |
| <i>Anomalocardia producta</i> |                                |                                | HQ703055                   | Sanya, Hainan province, China          |                                     |
| <i>Anomalocardia producta</i> |                                |                                | HQ703056                   | Beibhai, Guangxi province, China       |                                     |
| <i>Anomalodiscus</i>          |                                | <i>Anomalodiscus squamosus</i> | HQ703048                   | Wenchang, Hainan province, China       |                                     |
|                               |                                | <i>Anomalodiscus squamosus</i> | HQ703049                   | Wenchang, Hainan province, China       |                                     |
|                               |                                | <i>Anomalodiscus squamosus</i> | HQ703050                   | Lingao, Hainan province, China         |                                     |
|                               |                                | <i>Anomalodiscus squamosus</i> | HQ703051                   | Sanya, Hainan province, China          |                                     |
|                               |                                | <i>Anomalodiscus squamosus</i> | HM124611                   | China                                  |                                     |
| <i>Bonartemis</i>             |                                | <i>Bonartemis histrio</i>      | HQ703155                   | Beibhai, Guangxi province, China       |                                     |
|                               |                                | <i>Bonartemis histrio</i>      | HQ703156                   | Beibhai, Guangxi province, China       |                                     |
| <i>Callista</i>               |                                | <i>Callista brevisiphonata</i> | HQ703037                   | Qingdao, Shandong province, China      |                                     |
|                               |                                | <i>Callista brevisiphonata</i> | HQ703038                   | Qingdao, Shandong province, China      |                                     |
|                               |                                | <i>Callista brevisiphonata</i> | HQ703039                   | Qingdao, Shandong province, China      |                                     |
|                               |                                | <i>Callista brevisiphonata</i> | HQ703040                   | Qingdao, Shandong province, China      |                                     |
|                               | <i>Callista brevisiphonata</i> | JN898931                       | China                      |                                        |                                     |
|                               | <i>Callista brevisiphonata</i> | HM124569                       | China                      |                                        |                                     |



|                      |                              |          |                                        |
|----------------------|------------------------------|----------|----------------------------------------|
|                      | <i>Callista chinensis</i>    | HQ703035 | Pingtán, Fujian province, China        |
|                      | <i>Callista chinensis</i>    | HQ703036 | Pingtán, Fujian province, China        |
| <i>Circe</i>         | <i>Circe scripta</i>         | HQ703107 | Beibhai, Guangxi province, China       |
|                      | <i>Circe scripta</i>         | HQ703108 | Lingao, Hainan province, China         |
|                      | <i>Circe scripta</i>         | HQ703109 | Lingao, Hainan province, China         |
|                      | <i>Circe scripta</i>         | HQ703110 | Lingao, Hainan province, China         |
|                      | <i>Circe scripta</i>         | HQ703111 | Beibhai, Guangxi province, China       |
|                      | <i>Circe scripta</i>         | HQ703112 | Lingao, Hainan province, China         |
|                      | <i>Circe scripta</i>         | HQ703113 | Sanya, Hainan province, China          |
|                      | <i>Circe scripta</i>         | HQ703114 | Lingshui, Hainan province, China       |
| <i>Placamen</i>      | <i>Placamen calophylla</i>   | HQ703062 | Beibhai, Guangxi province, China       |
|                      | <i>Placamen calophylla</i>   | HQ703063 | Sanya, Hainan province, China          |
|                      | <i>Placamen calophylla</i>   | HQ703064 | Fangchenggang, Guangxi province, China |
|                      | <i>Placamen isabellina</i>   | HQ703057 | Beibu Bay, Guangxi province, China     |
|                      | <i>Placamen isabellina</i>   | HQ703058 | Beibu Bay, Guangxi province, China     |
|                      | <i>Placamen isabellina</i>   | HQ703059 | Beibu Bay, Guangxi province, China     |
|                      | <i>Placamen isabellina</i>   | HQ703060 | Beibhai, Guangxi province, China       |
|                      | <i>Placamen isabellina</i>   | HQ703061 | Beibhai, Guangxi province, China       |
| <i>Costacallista</i> | <i>Costacallista erycina</i> | HQ703031 | Beibhai, Guangxi province, China       |
|                      | <i>Costacallista erycina</i> | HQ703032 | Beibhai, Guangxi province, China       |
|                      | <i>Costacallista erycina</i> | HQ703033 | Beibhai, Guangxi province, China       |
|                      | <i>Costacallista erycina</i> | HQ703034 | Beibhai, Guangxi province, China       |
|                      | <i>Costacallista erycina</i> | JN898943 | China                                  |
|                      | <i>Costacallista erycina</i> | HM124570 | China                                  |
|                      | <i>Costacallista erycina</i> | EU117993 | China                                  |
| <i>Cyclina</i>       | <i>Cyclina sinensis</i>      | HM021149 | Japan                                  |
|                      | <i>Cyclina sinensis</i>      | HM021148 | Japan                                  |
|                      | <i>Cyclina sinensis</i>      | HM021147 | Japan                                  |
|                      | <i>Cyclina sinensis</i>      | HQ703115 | Zhoushan, Zhejiang province, China     |
|                      | <i>Cyclina sinensis</i>      | HQ703116 | Shengsi, Zhejiang province, China      |
|                      | <i>Cyclina sinensis</i>      | HQ703117 | Yueqing, Zhejiang province, China      |

|                |                            |          |                                      |
|----------------|----------------------------|----------|--------------------------------------|
|                | <i>Cyclina sinensis</i>    | HQ703118 | Dandong, Liaoning province, China    |
|                | <i>Cyclina sinensis</i>    | HQ703119 | Qinhuangdao, Hebei province, China   |
|                | <i>Cyclina sinensis</i>    | HQ703120 | Panjin, Liaoning province, China     |
|                | <i>Cyclina sinensis</i>    | HQ703121 | Dongxing, Guangxi province, China    |
|                | <i>Cyclina sinensis</i>    | HQ703122 | Jimo, Shandong province, China       |
|                | <i>Cyclina sinensis</i>    | HQ703123 | Lianyungang, Jiangsu province, China |
|                | <i>Cyclina sinensis</i>    | HQ703124 | Lvshun, Liaoning province, China     |
|                | <i>Cyclina sinensis</i>    | HQ703125 | Maoming, Guangdong province, China   |
|                | <i>Cyclina sinensis</i>    | HQ703126 | Qidong, Jiangsu province, China      |
|                | <i>Cyclina sinensis</i>    | HQ703127 | Sanya, Hainan province, China        |
|                | <i>Cyclina sinensis</i>    | HQ703128 | Tanggu, Tianjin province, China      |
|                | <i>Cyclina sinensis</i>    | HQ703129 | Changyi, Shandong province, China    |
|                | <i>Cyclina sinensis</i>    | HQ703130 | Xiamen, Fujian province, China       |
|                | <i>Cyclina sinensis</i>    | HQ703131 | Xiangshui, Jiangsu province, China   |
| <i>Sunetta</i> | <i>Sunetta concinna</i>    | JN898937 | China                                |
|                | <i>Sunetta menstrualis</i> | HQ703213 | Fenshui, Shandong province, China    |
|                | <i>Sunetta menstrualis</i> | HQ703214 | Fenshui, Shandong province, China    |
|                | <i>Sunetta menstrualis</i> | HQ703215 | Fenshui, Shandong province, China    |
|                | <i>Sunetta menstrualis</i> | HQ703216 | Fenshui, Shandong province, China    |
|                | <i>Sunetta menstrualis</i> | HM124589 | China                                |
|                | <i>Sunetta menstrualis</i> | HM124588 | China                                |
| <i>Dosinia</i> | <i>Dosinia angulosa</i>    | HQ703148 | Haikou, Hainan province, China       |
|                | <i>Dosinia angulosa</i>    | HQ703149 | Haikou, Hainan province, China       |
|                | <i>Dosinia angulosa</i>    | HQ703150 | Haikou, Hainan province, China       |
|                | <i>Dosinia angulosa</i>    | HQ703151 | Haikou, Hainan province, China       |
|                | <i>Dosinia biscocta</i>    | HM124577 | China                                |
|                | <i>Dosinia biscocta</i>    | HM124572 | China                                |
|                | <i>Dosinia corrugata</i>   | HQ703141 | Ganyu, Jiangsu province, China       |
|                | <i>Dosinia corrugata</i>   | HQ703142 | Ganyu, Jiangsu province, China       |
|                | <i>Dosinia corrugata</i>   | HQ703143 | Dalian, Liaoning province, China     |
|                | <i>Dosinia corrugata</i>   | HQ703144 | Dalian, Liaoning province, China     |

|                  |                              |          |                                      |
|------------------|------------------------------|----------|--------------------------------------|
|                  | <i>Dosinia corrugata</i>     | HQ703145 | Dalian, Liaoning province, China     |
|                  | <i>Dosinia corrugata</i>     | HQ703146 | Dalian, Liaoning province, China     |
|                  | <i>Dosinia corrugata</i>     | HQ703147 | Weihai, Shandong province, China     |
|                  | <i>Dosinia corrugata</i>     | JN898932 | China                                |
|                  | <i>Dosinia corrugata</i>     | HM124573 | China                                |
|                  | <i>Dosinia fibula</i>        | HQ703132 | Fenshui, Shandong province, China    |
|                  | <i>Dosinia fibula</i>        | HQ703133 | Changzhou, Fujian province, China    |
|                  | <i>Dosinia fibula</i>        | HQ703134 | Ganyu, Jiangsu province, China       |
|                  | <i>Dosinia fibula</i>        | HQ703135 | Beibhai, Guangxi province, China     |
|                  | <i>Dosinia fibula</i>        | HQ703136 | Beibhai, Guangxi province, China     |
|                  | <i>Dosinia japonicum</i>     | HQ703137 | Qingdao, Shandong province, China    |
|                  | <i>Dosinia japonicum</i>     | HQ703138 | Qingdao, Shandong province, China    |
|                  | <i>Dosinia troscheli</i>     | HQ703139 | Sanya, Hainan province, China        |
|                  | <i>Dosinia troscheli</i>     | HQ703140 | Changzhou, Fujian province, China    |
| <i>Gafrarium</i> | <i>Gafrarium dispar</i>      | HQ703086 | Lingao, Hainan province, China       |
|                  | <i>Gafrarium dispar</i>      | HQ703087 | Lingao, Hainan province, China       |
|                  | <i>Gafrarium dispar</i>      | HQ703088 | Lingao, Hainan province, China       |
|                  | <i>Gafrarium dispar</i>      | HQ703089 | Lingao, Hainan province, China       |
|                  | <i>Gafrarium dispar</i>      | HQ703090 | Lingao, Hainan province, China       |
|                  | <i>Gafrarium dispar</i>      | HQ703091 | Wenchang, Hainan province, China     |
|                  | <i>Gafrarium dispar</i>      | HQ703092 | Weizhou, Guangxi province, China     |
|                  | <i>Gafrarium dispar</i>      | HQ703093 | Sanya, Hainan province, China        |
|                  | <i>Gafrarium dispar</i>      | HQ703094 | Weizhou, Guangxi province, China     |
|                  | <i>Gafrarium divaricatum</i> | HQ703095 | Lingao, Hainan province, China       |
|                  | <i>Gafrarium divaricatum</i> | HQ703096 | Lingao, Hainan province, China       |
|                  | <i>Gafrarium divaricatum</i> | HQ703097 | Zhanjiang, Guangdong province, China |
|                  | <i>Gafrarium divaricatum</i> | HQ703098 | Zhanjiang, Guangdong province, China |
|                  | <i>Gafrarium divaricatum</i> | HQ703099 | Zhanjiang, Guangdong province, China |
|                  | <i>Gafrarium divaricatum</i> | HQ703100 | Zhanjiang, Guangdong province, China |
|                  | <i>Gafrarium divaricatum</i> | HQ703101 | Beibhai, Guangxi province, China     |
|                  | <i>Gafrarium divaricatum</i> | HQ703102 | Beibhai, Guangxi province, China     |

|                    |                                |          |                                      |
|--------------------|--------------------------------|----------|--------------------------------------|
|                    | <i>Gafrarium divaricatum</i>   | HQ703103 | Pingtang, Fujian province, China     |
|                    | <i>Gafrarium divaricatum</i>   | HQ703104 | Beibhai, Guangxi province, China     |
|                    | <i>Gafrarium divaricatum</i>   | HQ703105 | Beibhai, Guangxi province, China     |
|                    | <i>Gafrarium divaricatum</i>   | HQ703106 | Maoming, Guangdong province, China   |
|                    | <i>Gafrarium pectinatum</i>    | HQ703077 | Wenchang, Hainan province, China     |
|                    | <i>Gafrarium pectinatum</i>    | HQ703078 | Wenchang, Hainan province, China     |
|                    | <i>Gafrarium pectinatum</i>    | HQ703079 | Sanya, Hainan province, China        |
|                    | <i>Gafrarium pectinatum</i>    | HQ703080 | Qionghai, Hainan province, China     |
|                    | <i>Gafrarium tumidum</i>       | HQ703081 | Wenchang, Hainan province, China     |
|                    | <i>Gafrarium tumidum</i>       | HQ703082 | Wenchang, Hainan province, China     |
|                    | <i>Gafrarium tumidum</i>       | HQ703083 | Lingao, Hainan province, China       |
|                    | <i>Gafrarium tumidum</i>       | HQ703084 | Sanya, Hainan province, China        |
|                    | <i>Gafrarium tumidum</i>       | HQ703085 | Qionghai, Hainan province, China     |
| <i>Antigona</i>    | <i>Antigona lamellaris</i>     | HQ703334 | Sanya, Hainan province, China        |
|                    | <i>Antigona lamellaris</i>     | HQ703335 | Sanya, Hainan province, China        |
|                    | <i>Antigona lamellaris</i>     | HQ703336 | Sanya, Hainan province, China        |
|                    | <i>Antigona lamellaris</i>     | HQ703337 | Beibhai, Guangxi province, China     |
|                    | <i>Antigona lamellaris</i>     | HQ703338 | Beibhai, Guangxi province, China     |
|                    | <i>Antigona lamellaris</i>     | HQ703339 | Beibhai, Guangxi province, China     |
|                    | <i>Antigona lamellaris</i>     | HQ703340 | Beibhai, Guangxi province, China     |
|                    | <i>Antigona lamellaris</i>     | HQ703341 | Beibhai, Guangxi province, China     |
|                    | <i>Antigona lamellaris</i>     | HM124608 | China                                |
| <i>Globivenus</i>  | <i>Globivenus toreuma</i>      | HQ703342 | Lingao, Hainan province, China       |
| <i>Macridiscus</i> | <i>Macridiscus aequilatera</i> | HQ703266 | Haiyang, Shandong province, China    |
|                    | <i>Macridiscus aequilatera</i> | HQ703267 | Haiyang, Shandong province, China    |
|                    | <i>Macridiscus aequilatera</i> | HQ703268 | Haiyang, Shandong province, China    |
|                    | <i>Macridiscus aequilatera</i> | HQ703269 | Haiyang, Shandong province, China    |
|                    | <i>Macridiscus aequilatera</i> | HQ703270 | Haiyang, Shandong province, China    |
|                    | <i>Macridiscus aequilatera</i> | HQ703271 | Haiyang, Shandong province, China    |
|                    | <i>Macridiscus aequilatera</i> | HQ703272 | Haiyang, Shandong province, China    |
|                    | <i>Macridiscus aequilatera</i> | GQ855272 | Yangjiang, Guangdong province, China |

|                                   |          |                                      |
|-----------------------------------|----------|--------------------------------------|
| <i>Macridiscus aequilatera</i>    | GQ855273 | Beibhai, Guangxi province, China     |
| <i>Macridiscus aequilatera</i>    | GQ855274 | Beibhai, Guangxi province, China     |
| <i>Macridiscus aequilatera</i>    | GQ855275 | Beibhai, Guangxi province, China     |
| <i>Macridiscus aequilatera</i>    | GQ855276 | Zhoushan, Zhejiang province, China   |
| <i>Macridiscus melanaegis</i>     | HQ703273 | Weihai, Shandong province, China     |
| <i>Macridiscus melanaegis</i>     | HQ703274 | Weihai, Shandong province, China     |
| <i>Macridiscus multifarius</i>    | HQ224672 | China                                |
| <i>Macridiscus multifarius</i>    | HQ224673 | China                                |
| <i>Macridiscus multifarius</i>    | HQ224674 | China                                |
| <i>Macridiscus multifarius</i>    | HQ224675 | China                                |
| <i>Macridiscus multifarius</i>    | HQ224676 | China                                |
| <i>Macridiscus multifarius</i>    | HQ224677 | China                                |
| <i>Macridiscus multifarius</i>    | HQ224678 | China                                |
| <i>Macridiscus multifarius</i>    | HQ224679 | China                                |
| <i>Macridiscus semicancellata</i> | HQ703275 | Yangjiang, Guangdong province, China |
| <i>Macridiscus semicancellata</i> | HQ703276 | Beibhai, Guangxi province, China     |
| <i>Macridiscus semicancellata</i> | HQ703277 | Beibhai, Guangxi province, China     |
| <i>Macridiscus semicancellata</i> | HQ703278 | Beibhai, Guangxi province, China     |
| <i>Macridiscus semicancellata</i> | HQ703279 | Beibhai, Guangxi province, China     |
| <i>Macridiscus semicancellata</i> | HQ703280 | Beibhai, Guangxi province, China     |
| <i>Macridiscus semicancellata</i> | HQ703281 | Pingtang, Fujian province, China     |
| <i>Macridiscus semicancellata</i> | HQ224686 | China                                |
| <i>Macridiscus semicancellata</i> | HQ224687 | China                                |

|                  |                           |          |                                      |
|------------------|---------------------------|----------|--------------------------------------|
|                  | <i>semicancellata</i>     |          |                                      |
|                  | <i>Macridiscus</i>        | HQ224688 | China                                |
|                  | <i>semicancellata</i>     |          |                                      |
|                  | <i>Macridiscus</i>        | HQ224689 | China                                |
|                  | <i>semicancellata</i>     |          |                                      |
|                  | <i>Macridiscus</i>        | HQ224690 | China                                |
|                  | <i>semicancellata</i>     |          |                                      |
|                  | <i>Macridiscus</i>        | HQ224692 | China                                |
|                  | <i>semicancellata</i>     |          |                                      |
|                  | <i>Macridiscus</i>        | HQ224693 | China                                |
|                  | <i>semicancellata</i>     |          |                                      |
|                  | <i>Macridiscus</i>        | HQ224694 | China                                |
|                  | <i>semicancellata</i>     |          |                                      |
| <i>Katelysia</i> | <i>Katelysia hiantina</i> | JN898939 | China                                |
|                  | <i>Katelysia hiantina</i> | HM124599 | China                                |
|                  | <i>Katelysia hiantina</i> | HQ703287 | Lingshui, Hainan province, China     |
|                  | <i>Katelysia hiantina</i> | HQ703288 | Zhanjiang, Guangdong province, China |
|                  | <i>Katelysia hiantina</i> | HQ703289 | Maoming, Guangdong province, China   |
|                  | <i>Katelysia hiantina</i> | HQ703290 | Beibhai, Guangxi province, China     |
|                  | <i>Katelysia hiantina</i> | HQ703291 | Beibhai, Guangxi province, China     |
|                  | <i>Katelysia hiantina</i> | HQ703292 | Sanya, Hainan province, China        |
|                  | <i>Katelysia hiantina</i> | HQ703293 | Sanya, Hainan province, China        |
|                  | <i>Katelysia hiantina</i> | HQ703294 | Sanya, Hainan province, China        |
|                  | <i>Katelysia hiantina</i> | GQ855255 | Beibhai, Guangxi province, China     |
|                  | <i>Katelysia hiantina</i> | GQ855256 | Sanya, Hainan province, China        |
|                  | <i>Katelysia hiantina</i> | GQ855257 | Sanya, Hainan province, China        |
| <i>Marcia</i>    | <i>Marcia japonica</i>    | HQ703282 | Sanya, Hainan province, China        |
|                  | <i>Marcia japonica</i>    | HQ703283 | Sanya, Hainan province, China        |
|                  | <i>Marcia japonica</i>    | HQ703284 | Sanya, Hainan province, China        |
|                  | <i>Marcia japonica</i>    | HQ703285 | Wenchang, Hainan province, China     |
|                  | <i>Marcia japonica</i>    | HQ703286 | Wenchang, Hainan province, China     |

|                   |                              |          |                                   |
|-------------------|------------------------------|----------|-----------------------------------|
|                   | <i>Marcia japonica</i>       | GQ855258 | Sanya, Hainan province, China     |
|                   | <i>Marcia japonica</i>       | GQ855259 | Sanya, Hainan province, China     |
|                   | <i>Marcia japonica</i>       | GQ855260 | Sanya, Hainan province, China     |
|                   | <i>Marcia japonica</i>       | GQ855261 | Wenchang, Hainan province, China  |
|                   | <i>Marcia japonica</i>       | GQ855262 | Wenchang, Hainan province, China  |
|                   | <i>Marcia marmorata</i>      | HQ703296 | Sanya, Hainan province, China     |
|                   | <i>Marcia marmorata</i>      | HQ703297 | Sanya, Hainan province, China     |
|                   | <i>Marcia marmorata</i>      | HQ703298 | Beibhai, Guangxi province, China  |
|                   | <i>Marcia marmorata</i>      | HQ703299 | Beibhai, Guangxi province, China  |
|                   | <i>Marcia marmorata</i>      | HQ703300 | Beibhai, Guangxi province, China  |
|                   | <i>Marcia marmorata</i>      | HQ703301 | Beibhai, Guangxi province, China  |
|                   | <i>Marcia marmorata</i>      | HQ703302 | Beibhai, Guangxi province, China  |
|                   | <i>Marcia marmorata</i>      | HQ703303 | Baimajing, Hainan province, China |
| <i>Mercenaria</i> | <i>Mercenaria mercenaria</i> | AB685212 | Tokyo Bay, Japan                  |
|                   | <i>Mercenaria mercenaria</i> | AB685211 | Tokyo Bay, Japan                  |
|                   | <i>Mercenaria mercenaria</i> | AB685210 | Tokyo Bay, Japan                  |
|                   | <i>Mercenaria mercenaria</i> | AB685209 | Tokyo Bay, Japan                  |
|                   | <i>Mercenaria mercenaria</i> | AB685208 | Tokyo Bay, Japan                  |
|                   | <i>Mercenaria mercenaria</i> | AB685207 | Tokyo Bay, Japan                  |
|                   | <i>Mercenaria mercenaria</i> | AB685206 | Tokyo Bay, Japan                  |
|                   | <i>Mercenaria mercenaria</i> | AB685205 | Tokyo Bay, Japan                  |
|                   | <i>Mercenaria mercenaria</i> | AB685204 | Tokyo Bay, Japan                  |
|                   | <i>Mercenaria mercenaria</i> | AB685203 | Tokyo Bay, Japan                  |
|                   | <i>Mercenaria mercenaria</i> | AB685202 | Tokyo Bay, Japan                  |
|                   | <i>Mercenaria mercenaria</i> | AB685201 | Tokyo Bay, Japan                  |
|                   | <i>Mercenaria mercenaria</i> | AB685200 | Tokyo Bay, Japan                  |
|                   | <i>Mercenaria mercenaria</i> | AB685199 | Tokyo Bay, Japan                  |
|                   | <i>Mercenaria mercenaria</i> | AB685198 | Tokyo Bay, Japan                  |
|                   | <i>Mercenaria mercenaria</i> | AB685197 | Tokyo Bay, Japan                  |
|                   | <i>Mercenaria mercenaria</i> | AB685196 | Tokyo Bay, Japan                  |
|                   | <i>Mercenaria mercenaria</i> | AB685195 | Tokyo Bay, Japan                  |

|                 |                              |          |                                      |
|-----------------|------------------------------|----------|--------------------------------------|
|                 | <i>Mercenaria mercenaria</i> | AB685194 | Tokyo Bay, Japan                     |
|                 | <i>Mercenaria mercenaria</i> | AB685193 | Tokyo Bay, Japan                     |
|                 | <i>Mercenaria mercenaria</i> | AB670734 | Tokyo Bay, Japan                     |
|                 | <i>Mercenaria mercenaria</i> | AB670733 | Tokyo Bay, Japan                     |
|                 | <i>Mercenaria mercenaria</i> | AB670732 | Tokyo Bay, Japan                     |
|                 | <i>Mercenaria mercenaria</i> | AB670731 | Tokyo Bay, Japan                     |
|                 | <i>Mercenaria mercenaria</i> | AB670730 | Tokyo Bay, Japan                     |
|                 | <i>Mercenaria mercenaria</i> | AB670729 | Tokyo Bay, Japan                     |
|                 | <i>Mercenaria mercenaria</i> | AB670728 | Tokyo Bay, Japan                     |
|                 | <i>Mercenaria mercenaria</i> | AB670727 | Tokyo Bay, Japan                     |
|                 | <i>Mercenaria mercenaria</i> | AB670726 | Tokyo Bay, Japan                     |
|                 | <i>Mercenaria mercenaria</i> | AB670725 | Tokyo Bay, Japan                     |
|                 | <i>Mercenaria mercenaria</i> | AB670724 | Tokyo Bay, Japan                     |
|                 | <i>Mercenaria mercenaria</i> | AB670723 | Tokyo Bay, Japan                     |
|                 | <i>Mercenaria mercenaria</i> | AB670722 | Tokyo Bay, Japan                     |
|                 | <i>Mercenaria mercenaria</i> | AB670721 | Tokyo Bay, Japan                     |
|                 | <i>Mercenaria mercenaria</i> | AB670720 | Tokyo Bay, Japan                     |
|                 | <i>Mercenaria mercenaria</i> | AB670719 | Tokyo Bay, Japan                     |
|                 | <i>Mercenaria mercenaria</i> | HQ703071 | Lianyungang, Jiangsu province, China |
|                 | <i>Mercenaria mercenaria</i> | HQ703072 | Lianyungang, Jiangsu province, China |
|                 | <i>Mercenaria mercenaria</i> | HQ703073 | Lianyungang, Jiangsu province, China |
|                 | <i>Mercenaria mercenaria</i> | HQ703074 | Lianyungang, Jiangsu province, China |
|                 | <i>Mercenaria mercenaria</i> | HQ703075 | Lianyungang, Jiangsu province, China |
|                 | <i>Mercenaria mercenaria</i> | HQ703076 | Lianyungang, Jiangsu province, China |
|                 | <i>Mercenaria mercenaria</i> | JN898950 | China                                |
|                 | <i>Mercenaria mercenaria</i> | HM124619 | China                                |
|                 | <i>Mercenaria mercenaria</i> | HM124618 | China                                |
|                 | <i>Mercenaria mercenaria</i> | DQ399403 | China                                |
| <i>Meretrix</i> | <i>Meretrix lamarckii</i>    | HQ703188 | Haikou, Hainan province, China       |
|                 | <i>Meretrix lamarckii</i>    | HQ703189 | Haikou, Hainan province, China       |
|                 | <i>Meretrix lamarckii</i>    | HQ703190 | Haikou, Hainan province, China       |



|                           |          |                                      |
|---------------------------|----------|--------------------------------------|
| <i>Meretrix lamarckii</i> | HQ703191 | Sanya, Hainan province, China        |
| <i>Meretrix lamarckii</i> | HM124579 | China                                |
| <i>Meretrix lamarckii</i> | JN043625 | China                                |
| <i>Meretrix lusoria</i>   | JN043624 | China                                |
| <i>Meretrix lusoria</i>   | JN898936 | China                                |
| <i>Meretrix lusoria</i>   | FJ434681 | China                                |
| <i>Meretrix lusoria</i>   | JN898935 | China                                |
| <i>Meretrix lusoria</i>   | AB853864 | Aomori, Mutsu, Japan                 |
| <i>Meretrix lusoria</i>   | AB853865 | Kumamoto, Midorikawa, Japan          |
| <i>Meretrix lusoria</i>   | AB613023 | Kyoto, Asokai Lagoon, Japan          |
| <i>Meretrix lusoria</i>   | AB613022 | Kyoto, Asokai Lagoon, Japan          |
| <i>Meretrix lusoria</i>   | AB076924 | Aich, Yokkaichi, Japan               |
| <i>Meretrix lusoria</i>   | AB280786 | Oita, Japan                          |
| <i>Meretrix lyrata</i>    | HQ703192 | Zhangpu, Fujian province, China      |
| <i>Meretrix lyrata</i>    | HQ703193 | Zhangpu, Fujian province, China      |
| <i>Meretrix lyrata</i>    | HQ703194 | Zhanjiang, Guangdong province, China |
| <i>Meretrix lyrata</i>    | HQ703195 | Sanya, Hainan province, China        |
| <i>Meretrix lyrata</i>    | HQ703196 | Sanya, Hainan province, China        |
| <i>Meretrix lyrata</i>    | HQ703197 | Beibhai, Guangxi province, China     |
| <i>Meretrix lyrata</i>    | HQ703198 | Wenchang, Hainan province, China     |
| <i>Meretrix lyrata</i>    | JN043622 | China                                |
| <i>Meretrix lyrata</i>    | JN898944 | China                                |
| <i>Meretrix lyrata</i>    | HM124581 | China                                |
| <i>Meretrix meretrix</i>  | HQ703159 | Lingao, Hainan province, China       |
| <i>Meretrix meretrix</i>  | HQ703160 | Lingao, Hainan province, China       |
| <i>Meretrix meretrix</i>  | HQ703161 | Lingao, Hainan province, China       |
| <i>Meretrix meretrix</i>  | HQ703162 | Beibhai, Guangxi province, China     |
| <i>Meretrix meretrix</i>  | HQ703163 | Weizhou, Guangxi province, China     |
| <i>Meretrix meretrix</i>  | JN898949 | China                                |
| <i>Meretrix meretrix</i>  | HM124578 | China                                |
| <i>Meretrix meretrix</i>  | DQ399398 | China                                |

|                             |          |                                      |
|-----------------------------|----------|--------------------------------------|
| <i>Meretrix meretrix</i>    | JN043623 | China                                |
| <i>Meretrix meretrix</i>    | DQ399399 | China                                |
| <i>Meretrix meretrix</i>    | DQ399400 | China                                |
| <i>Meretrix meretrix</i>    | DQ399401 | China                                |
| <i>Meretrix meretrix</i>    | DQ399402 | China                                |
| <i>Meretrix petechialis</i> | HQ703164 | Panjin, Liaoning province, China     |
| <i>Meretrix petechialis</i> | HQ703165 | Panjin, Liaoning province, China     |
| <i>Meretrix petechialis</i> | HQ703166 | Ganyu, Jiangsu province, China       |
| <i>Meretrix petechialis</i> | HQ703167 | Ganyu, Jiangsu province, China       |
| <i>Meretrix petechialis</i> | HQ703168 | Ganyu, Jiangsu province, China       |
| <i>Meretrix petechialis</i> | HQ703169 | Nanyang, Jiangsu province, China     |
| <i>Meretrix petechialis</i> | HQ703170 | Nanyang, Jiangsu province, China     |
| <i>Meretrix petechialis</i> | HQ703171 | Nanyang, Jiangsu province, China     |
| <i>Meretrix petechialis</i> | HQ703172 | Fenshui, Shandong province, China    |
| <i>Meretrix petechialis</i> | HQ703173 | Sanya, Hainan province, China        |
| <i>Meretrix petechialis</i> | HQ703174 | Xiamen, Fujian province, China       |
| <i>Meretrix petechialis</i> | HQ703175 | Xiamen, Fujian province, China       |
| <i>Meretrix petechialis</i> | HQ703176 | Zhanjiang, Guangdong province, China |
| <i>Meretrix petechialis</i> | HQ703177 | Zhanjiang, Guangdong province, China |
| <i>Meretrix petechialis</i> | HQ703178 | Beibhai, Guangxi province, China     |
| <i>Meretrix petechialis</i> | HQ703179 | Beibhai, Guangxi province, China     |
| <i>Meretrix petechialis</i> | HQ703180 | Shantou, Guangdong province, China   |
| <i>Meretrix petechialis</i> | HQ703181 | Haikou, Hainan province, China       |
| <i>Meretrix petechialis</i> | HQ703182 | Haikou, Hainan province, China       |
| <i>Meretrix petechialis</i> | HQ703183 | Lingao, Hainan province, China       |
| <i>Meretrix petechialis</i> | HQ703184 | Yueqing, Zhejiang province, China    |
| <i>Meretrix petechialis</i> | HQ703185 | Beibhai, Guangxi province, China     |
| <i>Meretrix petechialis</i> | HQ703186 | Beibhai, Guangxi province, China     |
| <i>Meretrix petechialis</i> | HQ703187 | Yangjiang, Guangdong province, China |
| <i>Meretrix petechialis</i> | HM124583 | China                                |
| <i>Meretrix petechialis</i> | HM124582 | China                                |

|               |                             |          |                                                           |
|---------------|-----------------------------|----------|-----------------------------------------------------------|
|               | <i>Meretrix petechialis</i> | AB853869 | China                                                     |
|               | <i>Meretrix petechialis</i> | HM124584 | China                                                     |
| <i>Paphia</i> | <i>Paphia amabilis</i>      | HQ703249 | Beibhai, Guangxi province, China                          |
|               | <i>Paphia amabilis</i>      | HQ703250 | Beibhai, Guangxi province, China                          |
|               | <i>Paphia amabilis</i>      | HQ703251 | Beibhai, Guangxi province, China                          |
|               | <i>Paphia amabilis</i>      | HQ703252 | Beibhai, Guangxi province, China                          |
|               | <i>Paphia amabilis</i>      | HQ703253 | Beibhai, Guangxi province, China                          |
|               | <i>Paphia amabilis</i>      | HQ703254 | Beibhai, Guangxi province, China                          |
|               | <i>Paphia amabilis</i>      | HQ703255 | Beibhai, Guangxi province, China                          |
|               | <i>Paphia amabilis</i>      | HQ703256 | Wenchang, Hainan province, China                          |
|               | <i>Paphia amabilis</i>      | HQ703257 | Sanya, Hainan province, China                             |
|               | <i>Paphia amabilis</i>      | HQ703258 | Sanya, Hainan province, China                             |
|               | <i>Paphia amabilis</i>      | HQ703259 | Sanya, Hainan province, China                             |
|               | <i>Paphia amabilis</i>      | HQ703260 | Weizhou, Guangxi province, China                          |
|               | <i>Paphia amabilis</i>      | HQ703261 | Weizhou, Guangxi province, China                          |
|               | <i>Paphia amabilis</i>      | HQ703262 | Weizhou, Guangxi province, China                          |
|               | <i>Paphia amabilis</i>      | GQ855251 | Beibhai, Guangxi province, China                          |
|               | <i>Paphia amabilis</i>      | GQ855252 | Sanya, Hainan province, China                             |
|               | <i>Paphia amabilis</i>      | GQ855253 | Beibhai, Guangxi province, China                          |
|               | <i>Paphia amabilis</i>      | GQ855254 | Sanya, Hainan province, China                             |
|               | <i>Paphia euglypta</i>      | DQ184827 | Ueshima Island, off Murozumi, Yamaguchi Prefecture, Japan |
|               | <i>Paphia gallus</i>        | HQ703233 | Baimajing, Hainan province, China                         |
|               | <i>Paphia gallus</i>        | HQ703234 | Beibhai, Guangxi province, China                          |
|               | <i>Paphia gallus</i>        | HQ703235 | Beibhai, Guangxi province, China                          |
|               | <i>Paphia gallus</i>        | GQ855248 | Beibhai, Guangxi province, China                          |
|               | <i>Paphia gallus</i>        | GQ855249 | Danzhou, Hainan province, China                           |
|               | <i>Paphia gallus</i>        | GQ855250 | Beibhai, Guangxi province, China                          |
|               | <i>Paphia gallus</i>        | JQ277814 | China                                                     |
|               | <i>Paphia gallus</i>        | HM124597 | China                                                     |
|               | <i>Paphia gallus</i>        | JQ277813 | China                                                     |

|                            |          |                                   |
|----------------------------|----------|-----------------------------------|
| <i>Paphia gallus</i>       | JQ277812 | China                             |
| <i>Paphia gallus</i>       | JQ277811 | China                             |
| <i>Paphia gallus</i>       | JQ277810 | China                             |
| <i>Paphia gallus</i>       | JQ277809 | China                             |
| <i>Paphia gallus</i>       | JQ277808 | China                             |
| <i>Paphia gallus</i>       | JQ277807 | China                             |
| <i>Paphia gallus</i>       | JQ277806 | China                             |
| <i>Paphia gallus</i>       | JQ277805 | China                             |
| <i>Paphia gallus</i>       | JQ277804 | China                             |
| <i>Paphia gallus</i>       | JQ277803 | China                             |
| <i>Paphia papilionacea</i> | HQ703238 | Weihai, Shandong province, China  |
| <i>Paphia papilionacea</i> | HQ703239 | Weihai, Shandong province, China  |
| <i>Paphia papilionacea</i> | HQ703240 | Weihai, Shandong province, China  |
| <i>Paphia papilionacea</i> | HQ703241 | Weihai, Shandong province, China  |
| <i>Paphia papilionacea</i> | HQ703242 | Qingdao, Shandong province, China |
| <i>Paphia papilionacea</i> | HQ703243 | Qingdao, Shandong province, China |
| <i>Paphia papilionacea</i> | GQ855238 | Weihai, Shandong province, China  |
| <i>Paphia papilionacea</i> | GQ855239 | Weihai, Shandong province, China  |
| <i>Paphia papilionacea</i> | GQ855240 | Weihai, Shandong province, China  |
| <i>Paphia papilionacea</i> | GQ855241 | Weihai, Shandong province, China  |
| <i>Paphia papilionacea</i> | GQ855242 | Qingdao, Shandong province, China |
| <i>Paphia papilionacea</i> | GQ855243 | Qingdao, Shandong province, China |
| <i>Paphia papilionacea</i> | JN898946 | China                             |
| <i>Paphia papilionacea</i> | HM124590 | China                             |
| <i>Paphia semirugata</i>   | HQ703263 | Beibhai, Guangxi province, China  |
| <i>Paphia semirugata</i>   | HQ703264 | Beibhai, Guangxi province, China  |
| <i>Paphia semirugata</i>   | HQ703265 | Beibhai, Guangxi province, China  |
| <i>Paphia semirugata</i>   | HM124602 | China                             |
| <i>Paphia sinuosa</i>      | HQ703231 | Pingtang, Fujian province, China  |
| <i>Paphia sinuosa</i>      | JQ277815 | China                             |
| <i>Paphia textile</i>      | HQ703236 | Sanya, Hainan province, China     |

|                   |                              |          |                                                             |
|-------------------|------------------------------|----------|-------------------------------------------------------------|
|                   | <i>Paphia textile</i>        | HQ703237 | Beibhai, Guangxi province, China                            |
|                   | <i>Paphia textile</i>        | JN898938 | China                                                       |
|                   | <i>Paphia undulata</i>       | HQ703244 | Yangjiang, Guangdong province, China                        |
|                   | <i>Paphia undulata</i>       | HQ703245 | Fangchenggang, Guangxi province, China                      |
|                   | <i>Paphia undulata</i>       | HQ703246 | Fangchenggang, Guangxi province, China                      |
|                   | <i>Paphia undulata</i>       | HQ703247 | Beibhai, Guangxi province, China                            |
|                   | <i>Paphia undulata</i>       | HQ703248 | Shantou, Guangdong province, China                          |
|                   | <i>Paphia undulata</i>       | GQ855244 | Yangjiang, Guangdong province, China                        |
|                   | <i>Paphia undulata</i>       | GQ855245 | Fangchenggang, Guangxi province, China                      |
|                   | <i>Paphia undulata</i>       | GQ855246 | Beibhai, Guangxi province, China                            |
|                   | <i>Paphia undulata</i>       | GQ855247 | Fangchenggang, Guangxi province, China                      |
|                   | <i>Paphia undulata</i>       | JN898933 | China                                                       |
|                   | <i>Paphia undulata</i>       | HM124591 | China                                                       |
|                   | <i>Paphia vernicosa</i>      | DQ184828 | Fishing Nets, Iwaishima Island, Yamaguchi Prefecture, Japan |
| <i>Pelecypora</i> | <i>Pelecypora isocardia</i>  | HQ703209 | Qingdao, Shandong province, China                           |
|                   | <i>Pelecypora isocardia</i>  | HQ703210 | Fenshui, Shandong province, China                           |
|                   | <i>Pelecypora trigona</i>    | HM124586 | China                                                       |
| <i>Periglypta</i> | <i>Periglypta chemnitzii</i> | HQ703330 | Beibhai, Guangxi province, China                            |
|                   | <i>Periglypta chemnitzii</i> | HQ703331 | Beibhai, Guangxi province, China                            |
|                   | <i>Periglypta chemnitzii</i> | HQ703332 | Beibhai, Guangxi province, China                            |
|                   | <i>Periglypta chemnitzii</i> | HQ703333 | Beibhai, Guangxi province, China                            |
|                   | <i>Periglypta chemnitzii</i> | HM124614 | China                                                       |
|                   | <i>Periglypta compressa</i>  | HM124606 | China                                                       |
|                   | <i>Periglypta puerpera</i>   | HQ703318 | Sanya, Hainan province, China                               |
|                   | <i>Periglypta puerpera</i>   | HQ703319 | Sanya, Hainan province, China                               |
|                   | <i>Periglypta puerpera</i>   | HQ703320 | Sanya, Hainan province, China                               |
|                   | <i>Periglypta puerpera</i>   | HQ703321 | Sanya, Hainan province, China                               |
|                   | <i>Periglypta puerpera</i>   | HQ703322 | Lingshui, Hainan province, China                            |
|                   | <i>Periglypta puerpera</i>   | HQ703323 | Wenchang, Hainan province, China                            |
|                   | <i>Periglypta puerpera</i>   | HQ703324 | Wenchang, Hainan province, China                            |

|                   |                                |          |                                     |
|-------------------|--------------------------------|----------|-------------------------------------|
|                   | <i>Periglypta puerpera</i>     | HQ703325 | Qionghai, Hainan province, China    |
|                   | <i>Periglypta puerpera</i>     | HQ703326 | Qionghai, Hainan province, China    |
|                   | <i>Periglypta puerpera</i>     | HQ703327 | Qionghai, Hainan province, China    |
|                   | <i>Periglypta puerpera</i>     | HQ703328 | Haikou, Hainan province, China      |
|                   | <i>Periglypta puerpera</i>     | HQ703329 | Sanya, Hainan province, China       |
| <i>Pitarina</i>   | <i>Pitarina japonica</i>       | HQ703206 | Sanya, Hainan province, China       |
|                   | <i>Pitarina japonica</i>       | HQ703207 | Lingao, Hainan province, China      |
|                   | <i>Pitarina striatum</i>       | HQ703203 | Sanya, Hainan province, China       |
|                   | <i>Pitarina striatum</i>       | HQ703204 | Sanya, Hainan province, China       |
|                   | <i>Pitarina striatum</i>       | HQ703205 | Sanya, Hainan province, China       |
| <i>Protothaca</i> | <i>Protothaca jodoensis</i>    | HQ703065 | Haiyang, Shandong province, China   |
|                   | <i>Protothaca jodoensis</i>    | HQ703066 | Ganyu, Jiangsu province, China      |
|                   | <i>Protothaca jodoensis</i>    | HQ703067 | Ganyu, Jiangsu province, China      |
|                   | <i>Protothaca jodoensis</i>    | HQ703068 | Qingdao, Shandong province, China   |
|                   | <i>Protothaca jodoensis</i>    | HQ703069 | Qingdao, Shandong province, China   |
|                   | <i>Protothaca jodoensis</i>    | HQ703070 | Rushan, Shandong province, China    |
|                   | <i>Protothaca jodoensis</i>    | HM124607 | China                               |
|                   | <i>Protothaca jodoensis</i>    | HM124605 | China                               |
|                   | <i>Protothaca jodoensis</i>    | DQ399397 | China                               |
| <i>Ruditapes</i>  | <i>Ruditapes philippinarum</i> | HQ703304 | Jimo, Shandong province, China      |
|                   | <i>Ruditapes philippinarum</i> | HQ703305 | Rongcheng, Shandong province, China |
|                   | <i>Ruditapes philippinarum</i> | HQ703306 | Zhangpu, Fujian province, China     |
|                   | <i>Ruditapes philippinarum</i> | HQ703307 | Zhangpu, Fujian province, China     |
|                   | <i>Ruditapes philippinarum</i> | HQ703308 | Shenzhen, Guangdong province, China |
|                   | <i>Ruditapes philippinarum</i> | HQ703309 | Ganyu, Jiangsu province, China      |
|                   | <i>Ruditapes philippinarum</i> | HQ703310 | Nanji, Zhejiang province, China     |
|                   | <i>Ruditapes philippinarum</i> | HQ703311 | Baimajing, Hainan province, China   |
|                   | <i>Ruditapes philippinarum</i> | GQ855263 | Qingdao, Shandong province, China   |
|                   | <i>Ruditapes philippinarum</i> | GQ855264 | Rongcheng, Shandong province, China |
|                   | <i>Ruditapes philippinarum</i> | GQ855265 | Nanji, Zhejiang province, China     |
|                   | <i>Ruditapes philippinarum</i> | GQ855266 | Beibhai, Guangxi province, China    |

|                  |                                |          |                                        |
|------------------|--------------------------------|----------|----------------------------------------|
|                  | <i>Ruditapes philippinarum</i> | GQ855267 | Zhangpu, Fujian province, China        |
|                  | <i>Ruditapes philippinarum</i> | JN898947 | China                                  |
|                  | <i>Ruditapes philippinarum</i> | HM124595 | China                                  |
|                  | <i>Ruditapes philippinarum</i> | AB244389 | Kyoto, Miyazu Bay, Japan               |
|                  | <i>Ruditapes philippinarum</i> | AB244390 | Kyoto, Miyazu Bay, Japan               |
|                  | <i>Ruditapes philippinarum</i> | AB244391 | Kyoto, Miyazu Bay, Japan               |
|                  | <i>Ruditapes philippinarum</i> | AB244392 | Kumamoto, Ariake Sea, Japan            |
|                  | <i>Ruditapes philippinarum</i> | AB244393 | Kumamoto, Ariake Sea, Japan            |
|                  | <i>Ruditapes philippinarum</i> | AB244394 | Kumamoto, Ariake Sea, Japan            |
|                  | <i>Ruditapes philippinarum</i> | AB244395 | Kumamoto, Ariake Sea, Japan            |
|                  | <i>Ruditapes philippinarum</i> | AB244396 | Kumamoto, Ariake Sea, Japan            |
|                  | <i>Ruditapes philippinarum</i> | AB244397 | Hokkaido, Notsuke Bay, Hokkaido, Japan |
|                  | <i>Ruditapes philippinarum</i> | AB244398 | Hokkaido, Notsuke Bay, Hokkaido, Japan |
|                  | <i>Ruditapes philippinarum</i> | AB244399 | Hokkaido, Notsuke Bay, Hokkaido, Japan |
|                  | <i>Ruditapes philippinarum</i> | AB244400 | Hokkaido, Notsuke Bay, Hokkaido, Japan |
|                  | <i>Ruditapes philippinarum</i> | AB244401 | Hokkaido, Notsuke Bay, Hokkaido, Japan |
|                  | <i>Ruditapes philippinarum</i> | HM180833 | Korea                                  |
|                  | <i>Ruditapes philippinarum</i> | HM180834 | Korea                                  |
|                  | <i>Ruditapes variegata</i>     | HQ703312 | Beibhai, Guangxi province, China       |
|                  | <i>Ruditapes variegata</i>     | HQ703313 | Beibhai, Guangxi province, China       |
|                  | <i>Ruditapes variegata</i>     | HQ703314 | Weizhou, Guangxi province, China       |
|                  | <i>Ruditapes variegata</i>     | HQ703315 | Sanya, Hainan province, China          |
|                  | <i>Ruditapes variegata</i>     | HQ703316 | Sanya, Hainan province, China          |
|                  | <i>Ruditapes variegata</i>     | HQ703317 | Weizhou, Guangxi province, China       |
|                  | <i>Ruditapes variegata</i>     | GQ855268 | Beibhai, Guangxi province, China       |
|                  | <i>Ruditapes variegata</i>     | GQ855269 | Weizhou, Guangxi province, China       |
|                  | <i>Ruditapes variegata</i>     | GQ855270 | Danzhou, Hainan province, China        |
|                  | <i>Ruditapes variegata</i>     | GQ855271 | Beibhai, Guangxi province, China       |
| <i>Saxidomus</i> | <i>Saxidomus purpuratus</i>    | HQ703041 | Panjin, Liaoning province, China       |
|                  | <i>Saxidomus purpuratus</i>    | HQ703042 | Panjin, Liaoning province, China       |
|                  | <i>Saxidomus purpuratus</i>    | HQ703043 | Panjin, Liaoning province, China       |

|                  |                             |          |                                                 |
|------------------|-----------------------------|----------|-------------------------------------------------|
|                  | <i>Saxidomus purpuratus</i> | HQ703044 | Panjin, Liaoning province, China                |
|                  | <i>Saxidomus purpuratus</i> | HQ703045 | Dalian, Liaoning province, China                |
|                  | <i>Saxidomus purpuratus</i> | HQ703046 | Dalian, Liaoning province, China                |
|                  | <i>Saxidomus purpuratus</i> | HQ703047 | Dalian, Liaoning province, China                |
|                  | <i>Saxidomus purpuratus</i> | KP419933 | China                                           |
|                  | <i>Saxidomus purpuratus</i> | JN898951 | China                                           |
|                  | <i>Saxidomus purpuratus</i> | HM124571 | China                                           |
|                  | <i>Saxidomus purpuratus</i> | EU118007 | China                                           |
| <i>Tapes</i>     | <i>Tapes dorsatus</i>       | HQ703224 | Hepu, Guangxi province, China                   |
|                  | <i>Tapes dorsatus</i>       | HQ703225 | Hepu, Guangxi province, China                   |
|                  | <i>Tapes dorsatus</i>       | HQ703226 | Hepu, Guangxi province, China                   |
|                  | <i>Tapes dorsatus</i>       | HQ703227 | Hepu, Guangxi province, China                   |
|                  | <i>Tapes dorsatus</i>       | HQ703228 | Beibhai, Guangxi province, China                |
|                  | <i>Tapes dorsatus</i>       | HQ703229 | Beibhai, Guangxi province, China                |
|                  | <i>Tapes dorsatus</i>       | HQ703230 | Beibhai, Guangxi province, China                |
|                  | <i>Tapes dorsatus</i>       | GQ855277 | Beibhai, Guangxi province, China                |
|                  | <i>Tapes dorsatus</i>       | JN898942 | China                                           |
|                  | <i>Tapes dorsatus</i>       | HM124594 | China                                           |
|                  | <i>Tapes literatus</i>      | HQ703217 | Sanya, Hainan province, China                   |
|                  | <i>Tapes literatus</i>      | HQ703218 | Lingshui, Hainan province, China                |
|                  | <i>Tapes literatus</i>      | HQ703219 | Lingshui, Hainan province, China                |
|                  | <i>Tapes literatus</i>      | HQ703220 | Wenchang, Hainan province, China                |
|                  | <i>Tapes literatus</i>      | HQ703221 | Wenchang, Hainan province, China                |
|                  | <i>Tapes literatus</i>      | HQ703222 | Sanya, Hainan province, China                   |
|                  | <i>Tapes literatus</i>      | HQ703223 | Sanya, Hainan province, China                   |
|                  | <i>Tapes literatus</i>      | GQ855278 | Sanya, Hainan province, China                   |
|                  | <i>Tapes literatus</i>      | GQ855279 | Lingshui, Hainan province, China                |
|                  | <i>Tapes literatus</i>      | GQ855280 | Sanya, Hainan province, China                   |
|                  | <i>Tapes literatus</i>      | JN898941 | China                                           |
|                  | <i>Tapes literatus</i>      | HM124603 | China                                           |
| <i>Venerupis</i> | <i>Venerupis bruguieri</i>  | DQ184829 | Tanoura, Nagashima, Yamaguchi Prefecture, Japan |



|             |                               |              |                     |                                   |          |                                                           |
|-------------|-------------------------------|--------------|---------------------|-----------------------------------|----------|-----------------------------------------------------------|
|             |                               | Vesicomidae  | <i>Calyptogena</i>  | <i>Calyptogena extenta</i>        | AB479085 | Kurile Trench, Japan                                      |
|             |                               |              |                     | <i>Calyptogena kawamurai</i>      | AB479089 | Suruga Bay, Nankai Trough, Okinawa Trough, Okinawa, Japan |
|             |                               |              |                     | <i>Calyptogena phaseoliformis</i> | AB479088 | Kurile Trench, Japan                                      |
| Cephalopoda | Decapodiformes_incertae_sedis | Idiosepiidae | <i>Idiosepius</i>   | <i>Idiosepius biserialis</i>      | EU008955 | Takasu, Japan                                             |
|             |                               |              |                     | <i>Idiosepius biserialis</i>      | EU008954 | Takasu, Japan                                             |
|             |                               |              |                     | <i>Idiosepius biserialis</i>      | EU008953 | Takasu, Japan                                             |
|             |                               |              |                     | <i>Idiosepius paradoxus</i>       | EU008997 | Ushimado, Japan                                           |
|             |                               |              |                     | <i>Idiosepius paradoxus</i>       | EU008996 | Ushimado, Japan                                           |
|             |                               |              |                     | <i>Idiosepius paradoxus</i>       | EU008995 | Ushimado, Japan                                           |
|             |                               |              |                     | <i>Idiosepius paradoxus</i>       | EU008994 | Ushimado, Japan                                           |
|             |                               |              |                     | <i>Idiosepius paradoxus</i>       | EU008993 | Ushimado, Japan                                           |
|             |                               |              |                     | <i>Idiosepius paradoxus</i>       | EU008992 | Ushimado, Japan                                           |
|             |                               |              |                     | <i>Idiosepius paradoxus</i>       | EU008991 | Ushimado, Japan                                           |
|             |                               |              |                     | <i>Idiosepius paradoxus</i>       | EU008990 | Ushimado, Japan                                           |
|             |                               |              |                     | <i>Idiosepius paradoxus</i>       | EU008989 | Seto Inland Sea, Japan                                    |
|             |                               |              |                     | <i>Idiosepius paradoxus</i>       | EU008988 | Seto Inland Sea, Japan                                    |
|             |                               |              |                     | <i>Idiosepius paradoxus</i>       | EU008987 | Okinawa Island, Okinawa, Japan                            |
|             |                               |              |                     | <i>Idiosepius paradoxus</i>       | EU008986 | Okinawa Island, Okinawa, Japan                            |
|             |                               |              |                     | <i>Idiosepius paradoxus</i>       | EU008985 | Nagoya, Japan                                             |
|             |                               |              |                     | <i>Idiosepius paradoxus</i>       | EU008984 | Nagoya, Japan                                             |
|             |                               |              |                     | <i>Idiosepius paradoxus</i>       | EU008983 | Nagoya, Japan                                             |
|             |                               |              |                     | <i>Idiosepius paradoxus</i>       | EU008982 | Nagoya, Japan                                             |
|             |                               |              |                     | <i>Idiosepius paradoxus</i>       | EU008981 | Nagoya, Japan                                             |
|             |                               |              |                     | <i>Idiosepius paradoxus</i>       | EU008980 | Nagoya, Japan                                             |
|             |                               |              |                     | <i>Idiosepius paradoxus</i>       | EU008979 | Nagoya, Japan                                             |
|             | Myopsida                      | Loliginidae  | <i>Heterololigo</i> | <i>Heterololigo bleekeri</i>      | AB573761 | Japan                                                     |
|             |                               |              |                     | <i>Heterololigo bleekeri</i>      | AB573760 | Japan                                                     |
|             |                               |              |                     | <i>Heterololigo bleekeri</i>      | AB573759 | Japan                                                     |
|             |                               |              |                     | <i>Heterololigo bleekeri</i>      | AB573758 | Japan                                                     |

|                     |                                |          |                                       |
|---------------------|--------------------------------|----------|---------------------------------------|
|                     | <i>Heterololigo bleekeri</i>   | AB573757 | Japan                                 |
|                     | <i>Heterololigo bleekeri</i>   | AB573756 | Japan                                 |
|                     | <i>Heterololigo bleekeri</i>   | AB573755 | Japan                                 |
|                     | <i>Heterololigo bleekeri</i>   | AB573754 | Japan                                 |
|                     | <i>Heterololigo bleekeri</i>   | AB441190 | Japan                                 |
|                     | <i>Heterololigo bleekeri</i>   | AB441189 | Japan                                 |
|                     | <i>Heterololigo bleekeri</i>   | AB441188 | Japan                                 |
|                     | <i>Heterololigo bleekeri</i>   | AB441187 | Japan                                 |
|                     | <i>Heterololigo bleekeri</i>   | AB441185 | Japan                                 |
|                     | <i>Heterololigo bleekeri</i>   | AB441186 | Japan                                 |
|                     | <i>Heterololigo bleekeri</i>   | AB441184 | Japan                                 |
|                     | <i>Heterololigo bleekeri</i>   | AB441182 | Japan                                 |
|                     | <i>Heterololigo bleekeri</i>   | AB441181 | Japan                                 |
|                     | <i>Heterololigo bleekeri</i>   | AB441180 | Japan                                 |
|                     | <i>Heterololigo bleekeri</i>   | AB441179 | Japan                                 |
| <i>Sepioteuthis</i> | <i>Sepioteuthis lessoniana</i> | HQ529540 | Rizhao, Shandong province, China      |
|                     | <i>Sepioteuthis lessoniana</i> | HQ529541 | Rizhao, Shandong province, China      |
|                     | <i>Sepioteuthis lessoniana</i> | HQ529542 | Rizhao, Shandong province, China      |
|                     | <i>Sepioteuthis lessoniana</i> | EU349466 | Hong Kong, China                      |
|                     | <i>Sepioteuthis lessoniana</i> | AB986213 | Kagoshima, Tanega-shima Island, Japan |
|                     | <i>Sepioteuthis lessoniana</i> | AB986214 | Kagoshima, Tanega-shima Island, Japan |
|                     | <i>Sepioteuthis lessoniana</i> | AB986215 | Kagoshima, Tanega-shima Island, Japan |
|                     | <i>Sepioteuthis lessoniana</i> | AB986216 | Kagoshima, Tanega-shima Island, Japan |
|                     | <i>Sepioteuthis lessoniana</i> | AB986217 | Kagoshima, Tanega-shima Island, Japan |
|                     | <i>Sepioteuthis lessoniana</i> | AB986218 | Kagoshima, Tanega-shima Island, Japan |
|                     | <i>Sepioteuthis lessoniana</i> | AB986219 | Kagoshima, Tanega-shima Island, Japan |
|                     | <i>Sepioteuthis lessoniana</i> | AB986220 | Kagoshima, Tanega-shima Island, Japan |
|                     | <i>Sepioteuthis lessoniana</i> | AB986221 | Tokushima, Mugi, Japan                |
|                     | <i>Sepioteuthis lessoniana</i> | AB986222 | Tokushima, Mugi, Japan                |
|                     | <i>Sepioteuthis lessoniana</i> | AB986223 | Tokushima, Mugi, Japan                |
|                     | <i>Sepioteuthis lessoniana</i> | AB986224 | Tokushima, Mugi, Japan                |

|          |             |                     |                                   |          |                                      |
|----------|-------------|---------------------|-----------------------------------|----------|--------------------------------------|
| Octopoda | Octopodidae | <i>Amphioctopus</i> | <i>Sepioteuthis lessoniana</i>    | AB986225 | Tokushima, Mugi, Japan               |
|          |             |                     | <i>Sepioteuthis lessoniana</i>    | AB986226 | Tokushima, Mugi, Japan               |
|          |             |                     | <i>Amphioctopus aegina</i>        | HQ846132 | Lingao, Hainan province, China       |
|          |             |                     | <i>Amphioctopus aegina</i>        | HQ846133 | Lingao, Hainan province, China       |
|          |             |                     | <i>Amphioctopus aegina</i>        | HQ846134 | Lingao, Hainan province, China       |
|          |             |                     | <i>Amphioctopus aegina</i>        | HQ846135 | Xiamen, Fujian province, China       |
|          |             |                     | <i>Amphioctopus aegina</i>        | HQ846136 | Xiamen, Fujian province, China       |
|          |             |                     | <i>Amphioctopus aegina</i>        | HQ846137 | Xiamen, Fujian province, China       |
|          |             |                     | <i>Amphioctopus aegina</i>        | JX456267 | China                                |
|          |             |                     | <i>Amphioctopus fangsiao</i>      | HQ846126 | Xiamen, Fujian province, China       |
|          |             |                     | <i>Amphioctopus fangsiao</i>      | HQ846127 | Xiamen, Fujian province, China       |
|          |             |                     | <i>Amphioctopus fangsiao</i>      | HQ846114 | Lianyungang, Jiangsu province, China |
|          |             |                     | <i>Amphioctopus fangsiao</i>      | HQ846155 | Xiamen, Fujian province, China       |
|          |             |                     | <i>Amphioctopus fangsiao</i>      | AB430519 | Hiroshima, Takehara, Japan           |
|          |             |                     | <i>Amphioctopus fangsiao</i>      | AB430518 | East China Sea, China                |
|          |             |                     | <i>Amphioctopus kagoshimensis</i> | HQ846122 | Xiamen, Fujian province, China       |
|          |             |                     | <i>Amphioctopus kagoshimensis</i> | HQ846123 | Xiamen, Fujian province, China       |
|          |             |                     | <i>Amphioctopus kagoshimensis</i> | HQ846124 | Xiamen, Fujian province, China       |
|          |             |                     | <i>Amphioctopus kagoshimensis</i> | HQ846125 | Xiamen, Fujian province, China       |
|          |             |                     | <i>Amphioctopus kagoshimensis</i> | AB430520 | Kanagawa, Jogashima Island, Japan    |
|          |             |                     | <i>Amphioctopus marginatus</i>    | HQ846138 | Xiamen, Fujian province, China       |
|          |             |                     | <i>Amphioctopus marginatus</i>    | HQ846139 | Xiamen, Fujian province, China       |
|          |             |                     | <i>Amphioctopus marginatus</i>    | HQ846140 | Xiamen, Fujian province, China       |
|          |             |                     | <i>Amphioctopus marginatus</i>    | HQ846141 | Xiamen, Fujian province, China       |
|          |             |                     | <i>Amphioctopus marginatus</i>    | AB430522 | Kanagawa, Oiso, Japan                |
|          |             |                     | <i>Amphioctopus marginatus</i>    | AB430521 | East China Sea, China                |

|                       |                                         |          |                                        |
|-----------------------|-----------------------------------------|----------|----------------------------------------|
|                       | <i>Amphioctopus ovulum</i>              | AB430524 | Kouchi, Japan                          |
|                       | <i>Amphioctopus ovulum</i>              | AB430523 | East China Sea, China                  |
|                       | <i>Amphioctopus ovulum</i>              | HQ846156 | Xiamen, Fujian province, China         |
|                       | <i>Amphioctopus ovulum</i>              | HQ846157 | Xiamen, Fujian province, China         |
|                       | <i>Amphioctopus ovulum</i>              | HQ846158 | Xiamen, Fujian province, China         |
|                       | <i>Amphioctopus ovulum</i>              | HQ846159 | Xiamen, Fujian province, China         |
| <i>Callistoctopus</i> | <i>Callistoctopus<br/>aspilosomatis</i> | AB430525 | Okinawa, Miyagi Island, Okinawa, Japan |
|                       | <i>Callistoctopus luteus</i>            | AB430526 | Okinawa, Ohdo Beach, Okinawa, Japan    |
|                       | <i>Callistoctopus luteus</i>            | AB430527 | Kanagawa, Miura, Japan                 |
|                       | <i>Callistoctopus minor</i>             | AB430541 | Ehime, Imabari, Miyakubo, Japan        |
|                       | <i>Callistoctopus minor</i>             | HQ846113 | Rongcheng, Shandong province, China    |
|                       | <i>Callistoctopus minor</i>             | HQ846115 | Rongcheng, Shandong province, China    |
|                       | <i>Callistoctopus minor</i>             | HQ846116 | Rizhao, Shandong province, China       |
|                       | <i>Callistoctopus minor</i>             | HQ846117 | Rizhao, Shandong province, China       |
|                       | <i>Callistoctopus minor</i>             | HQ846118 | Dandong, Liaoning province, China      |
|                       | <i>Callistoctopus minor</i>             | HQ846119 | Dandong, Liaoning province, China      |
|                       | <i>Callistoctopus ornatus</i>           | AB430528 | Okinawa, Ohdo Beach, Okinawa, Japan    |
| <i>Cistopus</i>       | <i>Cistopus indicus</i>                 | JX456269 | China                                  |
|                       | <i>Cistopus taiwanicus</i>              | HQ846142 | Xiamen, Fujian province, China         |
|                       | <i>Cistopus taiwanicus</i>              | HQ846143 | Xiamen, Fujian province, China         |
| <i>Hapalochlaena</i>  | <i>Hapalochlaena cf.<br/>maculosa</i>   | HQ846163 | Lingao, Hainan province, China         |
|                       | <i>Hapalochlaena fasciata</i>           | AB430529 | Chiba, Japan                           |
|                       | <i>Hapalochlaena lunulata</i>           | AB430530 | Okinawa, Miyagi Island, Okinawa, Japan |
| <i>Octopus</i>        | <i>Octopus tankahkeei</i>               | JX456264 | China                                  |
|                       | <i>Octopus vulgaris</i>                 | HQ846110 | Wenzhou, Zhejiang province, China      |
|                       | <i>Octopus vulgaris</i>                 | HQ846154 | Xiamen, Fujian province, China         |
|                       | <i>Octopus vulgaris</i>                 | JX456270 | China                                  |
|                       | <i>Octopus vulgaris</i>                 | AB430547 | Kanagawa, Misaki, Japan                |
|                       | <i>Octopus vulgaris</i>                 | AB430546 | Hyogo, Japan                           |

|           |                |                     |                               |          |                                                |
|-----------|----------------|---------------------|-------------------------------|----------|------------------------------------------------|
|           |                |                     | <i>Octopus oshimai</i>        | JX456268 | China                                          |
|           |                |                     | <i>Octopus conispadiceus</i>  | AB430533 | Hokkaido, Kushiro, Hokkaido, Japan             |
|           |                |                     | <i>Octopus cyanea</i>         | AB430535 | Okinawa, Nakagusuku, Okinawa, Japan            |
|           |                |                     | <i>Octopus cyanea</i>         | AB430534 | Tokyo, Ogasawara Island, Japan                 |
|           |                |                     | <i>Octopus incella</i>        | AB430542 | Okinawa, Motobu, Hamamoto, Okinawa, Japan      |
|           |                |                     | <i>Octopus laqueus</i>        | AB430543 | Okinawa, Kadena, Mizugama, Okinawa, Japan      |
|           |                |                     | <i>Octopus longispadiceus</i> | AB430537 | Hyogo, Kasumi, Shirosaki, Japan                |
|           |                |                     | <i>Octopus nanhaiensis</i>    | HQ846121 | Sanya, Hainan province, China                  |
|           |                |                     | <i>Octopus oliveri</i>        | AB430532 | Tokyo, Ogasawara Island, Japan                 |
|           |                |                     | <i>Octopus parvus</i>         | AB430544 | Kanagawa, Misaki, Japan                        |
|           |                |                     | <i>Octopus wolfi</i>          | AB430545 | Okinawa, Kadena, Mizugama, Okinawa, Japan      |
| Oegopsida | Architeuthidae | <i>Architeuthis</i> | <i>Architeuthis dux</i>       | KC701762 | Sea of Japan, Japan                            |
|           |                |                     | <i>Architeuthis dux</i>       | KC701757 | Off Chichijima, Ogasawara, Japan               |
|           |                |                     | <i>Architeuthis dux</i>       | KC701751 | Sea of Japan, Japan                            |
|           |                |                     | <i>Architeuthis dux</i>       | KC701741 | Ohta City, Shimane Pref., Sea of Japan, Japan  |
|           |                |                     | <i>Architeuthis dux</i>       | KC701731 | Sea of Japan, Japan                            |
|           |                |                     | <i>Architeuthis dux</i>       | KC701730 | Ogasawara, Japan                               |
|           | Gonatidae      | <i>Berryteuthis</i> | <i>Berryteuthis anonychus</i> | AB749277 | Offshore Kushiro, western North Pacific, Japan |
|           |                |                     | <i>Berryteuthis magister</i>  | AB749281 | Offshore Kushiro, western North Pacific, Japan |
|           |                | <i>Gonatopsis</i>   | <i>Gonatopsis borealis</i>    | AB749275 | Offshore Kushiro, western North Pacific, Japan |
|           |                |                     | <i>Gonatopsis octopedatus</i> | AB749282 | Offshore Aomori Pref., Sea of Japan            |
|           |                | <i>Gonatus</i>      | <i>Gonatus berryi</i>         | AB749280 | Offshore Kushiro, western North Pacific, Japan |
|           |                |                     | <i>Gonatus kamtschaticus</i>  | AB749274 | Offshore Kushiro, western North Pacific, Japan |
|           |                |                     | <i>Gonatus madokai</i>        | AB749284 | Shore of Rausu, Hokkaido, Hokkaido, Japan      |
|           |                |                     | <i>Gonatus madokai</i>        | AB749283 | Shore of Rausu, Hokkaido, Hokkaido, Japan      |
|           |                |                     | <i>Gonatus madokai</i>        | AB749278 | Offshore Kushiro, western North Pacific, Japan |
|           |                |                     | <i>Gonatus onyx</i>           | AB749279 | Offshore Kushiro, western North Pacific, Japan |
|           |                |                     | <i>Gonatus pyros</i>          | AB749273 | Offshore Kushiro, western North Pacific, Japan |
| Sepiida   | Sepiidae       | <i>Sepia</i>        | <i>Sepia aculeata</i>         | HQ846106 | Yangjiang, Guangdong province, China           |
|           |                |                     | <i>Sepia aculeata</i>         | HQ846107 | Zhanjiang, Guangdong province, China           |
|           |                |                     | <i>Sepia aculeata</i>         | HQ846108 | Qinzhou, Guangxi province, China               |

|                            |          |                                      |
|----------------------------|----------|--------------------------------------|
| <i>Sepia aculeata</i>      | HQ846083 | Putian, Fujian province, China       |
| <i>Sepia andreana</i>      | AB430401 | Osaka, Japan                         |
| <i>Sepia aureomaculata</i> | AB430402 | Shizuoka, Japan                      |
| <i>Sepia esculenta</i>     | HQ846084 | Yangjiang, Guangdong province, China |
| <i>Sepia esculenta</i>     | HQ846085 | Zhoushan, Zhejiang province, China   |
| <i>Sepia esculenta</i>     | HQ846086 | Zhoushan, Zhejiang province, China   |
| <i>Sepia esculenta</i>     | HQ846089 | Qingdao, Shandong province, China    |
| <i>Sepia esculenta</i>     | HQ846087 | Rizhao, Shandong province, China     |
| <i>Sepia esculenta</i>     | HQ846088 | Dandong, Liaoning province, China    |
| <i>Sepia esculenta</i>     | HQ846091 | Qinzhou, Guangxi province, China     |
| <i>Sepia esculenta</i>     | HQ846090 | Beibhai, Guangxi province, China     |
| <i>Sepia esculenta</i>     | AB192335 | Wakayama, Japan                      |
| <i>Sepia kubiensis</i>     | AB193813 | Kochi, Irino, Japan                  |
| <i>Sepia latimanus</i>     | AB192338 | Okinawa, Makishi, Okinawa, Japan     |
| <i>Sepia lorigera</i>      | AB193810 | Mie, Japan                           |
| <i>Sepia lycidas</i>       | HQ846109 | Yangjiang, Guangdong province, China |
| <i>Sepia lycidas</i>       | AB192337 | Wakayama, Japan                      |
| <i>Sepia lycidas</i>       | AB675088 | Miyazaki, Japan                      |
| <i>Sepia madokai</i>       | AB430407 | Tottori, Karo, Japan                 |
| <i>Sepia pardex</i>        | AB193809 | Tottori, Sakaiminato, Japan          |
| <i>Sepia peterseni</i>     | AB192339 | Kouchi, Japan                        |
| <i>Sepia pharaonis</i>     | HQ846093 | Yangjiang, Guangdong province, China |
| <i>Sepia pharaonis</i>     | JN315869 | Lingshui, Hainan province, China     |
| <i>Sepia pharaonis</i>     | JN315870 | Lingshui, Hainan province, China     |
| <i>Sepia pharaonis</i>     | JN315871 | Lingshui, Hainan province, China     |
| <i>Sepia pharaonis</i>     | JN315872 | Lingshui, Hainan province, China     |
| <i>Sepia pharaonis</i>     | JN315873 | Lingshui, Hainan province, China     |
| <i>Sepia pharaonis</i>     | JN315874 | Lingshui, Hainan province, China     |
| <i>Sepia recurvirostra</i> | HQ846092 | Lingao, Hainan province, China       |
| <i>Sepia recurvirostra</i> | HQ846161 | Lingao, Hainan province, China       |
| <i>Sepia recurvirostra</i> | HQ846162 | Lingao, Hainan province, China       |

|           |             |                  |                              |          |                                               |
|-----------|-------------|------------------|------------------------------|----------|-----------------------------------------------|
|           |             |                  | <i>Sepia subtenuipes</i>     | AB430414 | Shizuoka, Japan                               |
|           |             |                  | <i>Sepia tenuipes</i>        | AB430411 | Shizuoka, Japan                               |
|           |             |                  | <i>Sepia tokioensis</i>      | AB430412 | Tottori, Karo, Japan                          |
|           |             | <i>Sepiella</i>  | <i>Sepiella maindroni</i>    | AB192341 | Osaka-bay, Japan                              |
|           |             |                  | <i>Sepiella maindroni</i>    | AF346853 | Tachibana Bay, Japan                          |
|           |             |                  | <i>Sepiella inermis</i>      | HQ846080 | Yangjiang, Guangdong province, China          |
|           |             |                  | <i>Sepiella inermis</i>      | HQ846081 | Yangjiang, Guangdong province, China          |
|           |             |                  | <i>Sepiella japonica</i>     | HQ846078 | Yangjiang, Guangdong province, China          |
|           |             |                  | <i>Sepiella japonica</i>     | HQ846079 | Yangjiang, Guangdong province, China          |
|           |             |                  | <i>Sepiella japonica</i>     | HQ846082 | Putian, Fujian province, China                |
| Sepiolida | Sepiolidae  | <i>Euprymna</i>  | <i>Euprymna berryi</i>       | HQ846099 | Beibhai, Guangxi province, China              |
|           |             |                  | <i>Euprymna berryi</i>       | HQ846100 | Beibhai, Guangxi province, China              |
|           |             |                  | <i>Euprymna berryi</i>       | HQ846101 | Yangjiang, Guangdong province, China          |
|           |             |                  | <i>Euprymna berryi</i>       | HQ846102 | Yangjiang, Guangdong province, China          |
|           |             |                  | <i>Euprymna morsei</i>       | HQ846103 | Qingdao, Shandong province, China             |
|           |             |                  | <i>Euprymna morsei</i>       | HQ846104 | Rizhao, Shandong province, China              |
|           |             |                  | <i>Euprymna morsei</i>       | HQ846105 | Rizhao, Shandong province, China              |
|           |             | <i>Sepiola</i>   | <i>Sepiola birostrata</i>    | HQ846094 | Rizhao, Shandong province, China              |
|           |             |                  | <i>Sepiola birostrata</i>    | HQ846095 | Rizhao, Shandong province, China              |
|           |             |                  | <i>Sepiola birostrata</i>    | HQ846096 | Rizhao, Shandong province, China              |
|           |             |                  | <i>Sepiola birostrata</i>    | HQ846097 | Rizhao, Shandong province, China              |
|           |             |                  | <i>Sepiola birostrata</i>    | HQ846098 | Rizhao, Shandong province, China              |
|           |             | <i>Sepiolina</i> | <i>Sepiolina nipponensis</i> | AB591073 | Tosa Bay, Japan                               |
|           |             |                  | <i>Sepiolina petasa</i>      | AB591071 | Okinawa, off Kumeshima Island, Okinawa, Japan |
| Teuthida  | Loliginidae | <i>Loliolus</i>  | <i>Loliolus beka</i>         | HQ529502 | Rizhao, Shandong province, China              |
|           |             |                  | <i>Loliolus beka</i>         | HQ529503 | Rizhao, Shandong province, China              |
|           |             |                  | <i>Loliolus beka</i>         | HQ529504 | Rizhao, Shandong province, China              |
|           |             |                  | <i>Loliolus beka</i>         | HQ529505 | Qingdao, Shandong province, China             |
|           |             |                  | <i>Loliolus beka</i>         | HQ529506 | Qingdao, Shandong province, China             |
|           |             |                  | <i>Loliolus beka</i>         | HQ529507 | Qingdao, Shandong province, China             |
|           |             |                  | <i>Loliolus beka</i>         | HQ529508 | Qingdao, Shandong province, China             |

|                   |                              |          |                                      |
|-------------------|------------------------------|----------|--------------------------------------|
|                   | <i>Loliolus beka</i>         | HQ529509 | Qingdao, Shandong province, China    |
|                   | <i>Loliolus beka</i>         | HQ529510 | Rizhao, Shandong province, China     |
|                   | <i>Loliolus beka</i>         | HQ529511 | Rizhao, Shandong province, China     |
|                   | <i>Loliolus beka</i>         | HQ529512 | Rizhao, Shandong province, China     |
|                   | <i>Loliolus beka</i>         | HQ529513 | Rizhao, Shandong province, China     |
|                   | <i>Loliolus beka</i>         | HQ529514 | Rizhao, Shandong province, China     |
|                   | <i>Loliolus beka</i>         | HQ529515 | Yangjiang, Guangdong province, China |
|                   | <i>Loliolus beka</i>         | HQ529516 | Yangjiang, Guangdong province, China |
|                   | <i>Loliolus japonica</i>     | HQ529517 | Xiamen, Fujian province, China       |
|                   | <i>Loliolus japonica</i>     | HQ529518 | Xiamen, Fujian province, China       |
|                   | <i>Loliolus japonica</i>     | HQ529519 | Xiamen, Fujian province, China       |
|                   | <i>Loliolus japonica</i>     | HQ529520 | Xiamen, Fujian province, China       |
|                   | <i>Loliolus japonica</i>     | HQ529521 | Qinzhou, Guangxi province, China     |
|                   | <i>Loliolus japonica</i>     | HQ529522 | Qinzhou, Guangxi province, China     |
|                   | <i>Loliolus uyii</i>         | HQ529524 | Yangjiang, Guangdong province, China |
|                   | <i>Loliolus uyii</i>         | HQ529523 | Sanya, Hainan province, China        |
|                   | <i>Loliolus uyii</i>         | HQ529525 | Sanya, Hainan province, China        |
|                   | <i>Loliolus uyii</i>         | HQ529526 | Sanya, Hainan province, China        |
|                   | <i>Loliolus uyii</i>         | HQ529527 | Sanya, Hainan province, China        |
| <i>Uroteuthis</i> | <i>Uroteuthis sibogae</i>    | HQ529537 | Xiamen, Fujian province, China       |
|                   | <i>Uroteuthis sibogae</i>    | HQ529538 | Xiamen, Fujian province, China       |
|                   | <i>Uroteuthis sibogae</i>    | HQ529539 | Xiamen, Fujian province, China       |
|                   | <i>Uroteuthis chinensis</i>  | HQ529528 | Sanya, Hainan province, China        |
|                   | <i>Uroteuthis chinensis</i>  | EU349446 | Fujian, Xiamen province, China       |
|                   | <i>Uroteuthis chinensis</i>  | EU349445 | Fujian, Xiamen province, China       |
|                   | <i>Uroteuthis chinensis</i>  | EU349444 | Fujian, Xiamen province, China       |
|                   | <i>Uroteuthis chinensis</i>  | EU349443 | Fujian, Xiamen province, China       |
|                   | <i>Uroteuthis chinensis</i>  | EU349438 | Hong Kong, China                     |
|                   | <i>Uroteuthis chinensis</i>  | EU349437 | Hong Kong, China                     |
|                   | <i>Uroteuthis duvaucelii</i> | HQ529529 | Qinzhou, Guangxi province, China     |
|                   | <i>Uroteuthis duvaucelii</i> | HQ529530 | Qinzhou, Guangxi province, China     |



|                              |          |                                  |
|------------------------------|----------|----------------------------------|
| <i>Uroteuthis duvaucelii</i> | HQ529531 | Sanya, Hainan province, China    |
| <i>Uroteuthis duvaucelii</i> | HQ529532 | Sanya, Hainan province, China    |
| <i>Uroteuthis duvaucelii</i> | HQ529533 | Pingtang, Fujian province, China |
| <i>Uroteuthis duvaucelii</i> | HQ529534 | Pingtang, Fujian province, China |
| <i>Uroteuthis duvaucelii</i> | HQ529535 | Beibhai, Guangxi province, China |
| <i>Uroteuthis duvaucelii</i> | EU349465 | Shanghai, China                  |
| <i>Uroteuthis duvaucelii</i> | EU349464 | Hong Kong, China                 |
| <i>Uroteuthis duvaucelii</i> | EU349463 | Hong Kong, China                 |
| <i>Uroteuthis edulis</i>     | EU349462 | Shanghai, China                  |
| <i>Uroteuthis edulis</i>     | EU349461 | Shanghai, China                  |
| <i>Uroteuthis edulis</i>     | EU349460 | Shanghai, China                  |
| <i>Uroteuthis edulis</i>     | EU349459 | Shanghai, China                  |
| <i>Uroteuthis edulis</i>     | EU349458 | Shanghai, China                  |
| <i>Uroteuthis edulis</i>     | AB675080 | Yamaguchi, Japan                 |
| <i>Uroteuthis edulis</i>     | AB675081 | Shimane, Japan                   |
| <i>Uroteuthis edulis</i>     | KF032040 | Niigata, Japan                   |
| <i>Uroteuthis edulis</i>     | KF032039 | Saga, Japan                      |
| <i>Uroteuthis edulis</i>     | KF032038 | Saga, Japan                      |
| <i>Uroteuthis edulis</i>     | KF032037 | Saga, Japan                      |
| <i>Uroteuthis edulis</i>     | EU349456 | Japan                            |
| <i>Uroteuthis edulis</i>     | EU349455 | Japan                            |
| <i>Uroteuthis edulis</i>     | EU349454 | Japan                            |
| <i>Uroteuthis edulis</i>     | EU349453 | Japan                            |
| <i>Uroteuthis edulis</i>     | EU349452 | Japan                            |
| <i>Uroteuthis edulis</i>     | EU349451 | Japan                            |
| <i>Uroteuthis edulis</i>     | EU349450 | Japan                            |
| <i>Uroteuthis edulis</i>     | EU349449 | Japan                            |
| <i>Uroteuthis edulis</i>     | EU349448 | Japan                            |
| <i>Uroteuthis edulis</i>     | EU349447 | Japan                            |
| <i>Aplysia kurodai</i>       | JX560148 | Japan                            |
| <i>Aplysia kurodai</i>       | JX560147 | Japan                            |

Gastropoda      Anaspidea

Aplysiidae      *Aplysia*

|                         |                                 |                                    |                                   |                                    |                                        |
|-------------------------|---------------------------------|------------------------------------|-----------------------------------|------------------------------------|----------------------------------------|
| Archaeogastropoda       | Calliostomatidae                | <i>Calliostoma</i>                 | <i>Calliostoma aculeatum</i>      | AB505271                           | Kanagawa, Miura, Off Zyogasima, Japan  |
|                         |                                 |                                    | <i>Calliostoma akoya</i>          | AB505272                           | Chiba, Japan                           |
|                         |                                 |                                    | <i>Calliostoma consors</i>        | FN435323                           | Mie, Sugashima, Japan                  |
|                         |                                 |                                    | <i>Calliostoma haliarchus</i>     | AB505273                           | Iwate, Off Yagi, Japan                 |
|                         |                                 |                                    | <i>Calliostoma sakashitai</i>     | AB365225                           | Kanagawa, Misaki, Japan                |
|                         |                                 |                                    | <i>Calliostoma shinagawaensis</i> | AB505275                           | Kanagawa, Miura, Off Zyogasima, Japan  |
|                         | Lepetidae                       | <i>Lepeta</i>                      | <i>Lepeta caeca</i>               | AB238458                           | Hokkaido, Akkeshi, Hokkaido, Japan     |
|                         |                                 |                                    | <i>Lepeta caeca</i>               | AB543978                           | Hokkaido, Akkeshi, Hokkaido, Japan     |
|                         |                                 | <i>Limalepeta</i>                  | <i>Limalepeta lima</i>            | AB543979                           | Hokkaido, Urakawa-cho, Hokkaido, Japan |
|                         |                                 |                                    | <i>Limalepeta lima</i>            | AB543980                           | Hokkaido, Urakawa-cho, Hokkaido, Japan |
|                         |                                 | <i>Sagamilepeta</i>                | <i>Sagamilepeta sagamiensis</i>   | AB543981                           | Chiba, Japan                           |
|                         | <i>Sagamilepeta sagamiensis</i> |                                    | AB543982                          | Chiba, Japan                       |                                        |
|                         | Lepetodrilidae                  | <i>Lepetodrilus</i>                | <i>Lepetodrilus nux</i>           | AB820805                           | The Okinawa Trough, Okinawa, Japan     |
|                         |                                 |                                    | <i>Lepetodrilus nux</i>           | AB820806                           | The Okinawa Trough, Okinawa, Japan     |
|                         |                                 |                                    | <i>Lepetodrilus nux</i>           | AB820807                           | The Okinawa Trough, Okinawa, Japan     |
|                         |                                 |                                    | <i>Lepetodrilus nux</i>           | AB820808                           | The Okinawa Trough, Okinawa, Japan     |
|                         |                                 |                                    | <i>Lepetodrilus nux</i>           | AB820809                           | The Okinawa Trough, Okinawa, Japan     |
|                         |                                 |                                    | <i>Lepetodrilus nux</i>           | AB820810                           | The Okinawa Trough, Okinawa, Japan     |
|                         |                                 |                                    | <i>Lepetodrilus nux</i>           | AB820811                           | The Okinawa Trough, Okinawa, Japan     |
|                         |                                 |                                    | <i>Lepetodrilus nux</i>           | AB820812                           | The Okinawa Trough, Okinawa, Japan     |
| <i>Lepetodrilus nux</i> |                                 |                                    | AB820813                          | The Okinawa Trough, Okinawa, Japan |                                        |
| <i>Lepetodrilus nux</i> |                                 |                                    | AB820814                          | The Okinawa Trough, Okinawa, Japan |                                        |
| <i>Lepetodrilus nux</i> |                                 |                                    | AB820815                          | The Okinawa Trough, Okinawa, Japan |                                        |
| <i>Lepetodrilus nux</i> |                                 |                                    | AB820816                          | The Okinawa Trough, Okinawa, Japan |                                        |
| <i>Lepetodrilus nux</i> |                                 |                                    | AB820817                          | The Okinawa Trough, Okinawa, Japan |                                        |
| <i>Lepetodrilus nux</i> |                                 |                                    | AB820818                          | The Okinawa Trough, Okinawa, Japan |                                        |
| <i>Lepetodrilus nux</i> | AB820819                        | The Okinawa Trough, Okinawa, Japan |                                   |                                    |                                        |
| <i>Lepetodrilus nux</i> | AB820820                        | The Okinawa Trough, Okinawa, Japan |                                   |                                    |                                        |
| <i>Lepetodrilus nux</i> | AB820821                        | The Okinawa Trough, Okinawa, Japan |                                   |                                    |                                        |
| <i>Lepetodrilus nux</i> | AB820822                        | The Okinawa Trough, Okinawa, Japan |                                   |                                    |                                        |

|                  |                      |                                |          |                                         |
|------------------|----------------------|--------------------------------|----------|-----------------------------------------|
|                  |                      | <i>Lepetodrilus nux</i>        | AB820823 | The Okinawa Trough, Okinawa, Japan      |
|                  |                      | <i>Lepetodrilus nux</i>        | AB820824 | The Okinawa Trough, Okinawa, Japan      |
|                  |                      | <i>Lepetodrilus nux</i>        | AB820825 | The Okinawa Trough, Okinawa, Japan      |
|                  |                      | <i>Lepetodrilus nux</i>        | AB820826 | The Okinawa Trough, Okinawa, Japan      |
|                  |                      | <i>Lepetodrilus nux</i>        | AB820827 | The Okinawa Trough, Okinawa, Japan      |
|                  |                      | <i>Lepetodrilus nux</i>        | AB820828 | The Okinawa Trough, Okinawa, Japan      |
|                  |                      | <i>Lepetodrilus nux</i>        | AB820829 | The Okinawa Trough, Okinawa, Japan      |
|                  |                      | <i>Lepetodrilus nux</i>        | AB820830 | The Okinawa Trough, Okinawa, Japan      |
|                  |                      | <i>Lepetodrilus nux</i>        | AB820831 | The Okinawa Trough, Okinawa, Japan      |
|                  |                      | <i>Lepetodrilus nux</i>        | AB820832 | The Okinawa Trough, Okinawa, Japan      |
|                  |                      | <i>Lepetodrilus nux</i>        | AB820833 | The Okinawa Trough, Okinawa, Japan      |
|                  |                      | <i>Lepetodrilus nux</i>        | AB820834 | The Okinawa Trough, Okinawa, Japan      |
|                  |                      | <i>Lepetodrilus nux</i>        | AB820835 | The Okinawa Trough, Okinawa, Japan      |
|                  |                      | <i>Lepetodrilus nux</i>        | AB820836 | The Okinawa Trough, Okinawa, Japan      |
|                  |                      | <i>Lepetodrilus nux</i>        | AB820837 | The Okinawa Trough, Okinawa, Japan      |
|                  |                      | <i>Lepetodrilus nux</i>        | AB820838 | The Okinawa Trough, Okinawa, Japan      |
|                  |                      | <i>Lepetodrilus nux</i>        | AB820839 | The Okinawa Trough, Okinawa, Japan      |
| Pleurotomariidae | <i>Mikadotrochus</i> | <i>Mikadotrochus beyrichii</i> | AM049331 | Boso Peninsula, Chiba Prefecture, Japan |
|                  |                      | <i>Mikadotrochus beyrichii</i> | EU530109 | Japan                                   |
| Skeneidae        | <i>Dillwynella</i>   | <i>Dillwynella vitrea</i>      | AM049336 | Owase City, Mie Prefecture, Japan       |
|                  |                      | <i>Dillwynella vitrea</i>      | EU530143 | Japan                                   |
|                  | <i>Munditiella</i>   | <i>Munditiella ammonoceras</i> | AM049337 | Okinawa, Aguni Island, Okinawa, Japan   |
|                  |                      | <i>Munditiella ammonoceras</i> | AB365244 | Okinawa, Ishigaki, Okinawa, Japan       |
| Stomatellidae    | <i>Stomatella</i>    | <i>Stomatella impertusa</i>    | AB505292 | Okinawa, Benoki, Okinawa, Japan         |
|                  |                      | <i>Stomatella planulata</i>    | AB505293 | Kagoshima, Japan                        |
|                  |                      | <i>Stomatella planulata</i>    | EU530132 | Japan                                   |
|                  |                      | <i>Stomatella planulata</i>    | EU530131 | Japan                                   |
|                  |                      | <i>Stomatella planulata</i>    | EU530130 | Japan                                   |
| Trochidae        | <i>Alcyna</i>        | <i>Alcyna ocellata</i>         | AB505278 | Kumamoto, Nogamazima, Japan             |
|                  |                      | <i>Alcyna ocellata</i>         | AB505277 | Kumamoto, Nogamazima, Japan             |
|                  | <i>Broderipia</i>    | <i>Broderipia iridescens</i>   | AB505284 | Kagoshima, Japan                        |

|                    |                                 |          |                                           |
|--------------------|---------------------------------|----------|-------------------------------------------|
|                    | <i>Broderipia iridescens</i>    | EU530139 | Japan                                     |
| <i>Cantharidus</i> | <i>Cantharidus bisbalteatus</i> | AB505279 | Kumamoto, Nogamazima, Japan               |
|                    | <i>Cantharidus callichroa</i>   | AM049338 | Omaezaki Town, Shizuoka Prefecture, Japan |
|                    | <i>Cantharidus callichroa</i>   | EU530120 | Japan                                     |
|                    | <i>Cantharidus callichroa</i>   | EU530119 | Japan                                     |
|                    | <i>Cantharidus infuscatus</i>   | AB505282 | Kagoshima, Japan                          |
|                    | <i>Cantharidus jessoensis</i>   | AB505280 | Iwate, Otsuchi, Japan                     |
| <i>Chlorostoma</i> | <i>Chlorostoma lischkei</i>     | EU530145 | Japan                                     |
|                    | <i>Chlorostoma lischkei</i>     | EU530144 | Japan                                     |
|                    | <i>Chlorostoma turbinatum</i>   | HM180511 | Korea                                     |
|                    | <i>Chlorostoma turbinatum</i>   | HM180512 | Korea                                     |
|                    | <i>Chlorostoma turbinatum</i>   | HM180513 | Korea                                     |
|                    | <i>Chlorostoma turbinatum</i>   | HM180514 | Korea                                     |
|                    | <i>Chlorostoma turbinatum</i>   | HM180515 | Korea                                     |
|                    | <i>Chlorostoma turbinatum</i>   | HM180516 | Korea                                     |
|                    | <i>Chlorostoma turbinatum</i>   | HM180517 | Korea                                     |
|                    | <i>Chlorostoma turbinatum</i>   | HM180518 | Korea                                     |
|                    | <i>Chlorostoma turbinatum</i>   | HM180519 | Korea                                     |
|                    | <i>Chlorostoma turbinatum</i>   | HM180520 | Korea                                     |
|                    | <i>Chlorostoma turbinatum</i>   | HM180521 | Korea                                     |
|                    | <i>Chlorostoma turbinatum</i>   | HM180522 | Korea                                     |
|                    | <i>Chlorostoma turbinatum</i>   | HM180523 | Korea                                     |
|                    | <i>Chlorostoma turbinatum</i>   | HM180524 | Korea                                     |
|                    | <i>Chlorostoma turbinatum</i>   | HM180525 | Korea                                     |
|                    | <i>Chlorostoma turbinatum</i>   | HM180526 | Korea                                     |
| <i>Clanculus</i>   | <i>Clanculus bronni</i>         | AB505296 | Kumamoto, Amakusa, Tsuzizima, Japan       |
|                    | <i>Clanculus margaritarius</i>  | AB505297 | Kagoshima, Japan                          |
|                    | <i>Clanculus microdon</i>       | AB505298 | Kumamoto, Nogamazima, Japan               |
| <i>Conotalopia</i> | <i>Conotalopia mustelina</i>    | AB505302 | Kanagawa, Manaduru, Japan                 |
|                    | <i>Conotalopia ornata</i>       | AB505303 | Chiba, Japan                              |
| <i>Diloma</i>      | <i>Diloma piperinus</i>         | AB505288 | Okinawa, Benoki, Okinawa, Japan           |

|                    |                             |          |                                                    |
|--------------------|-----------------------------|----------|----------------------------------------------------|
|                    | <i>Diloma radula</i>        | AY858090 | Okinawa, Okinawa, Japan                            |
|                    | <i>Diloma suavis</i>        | AB505281 | Tokyo, Ogasawara Islands, Chichijima Suzaki, Japan |
| <i>Ethaliella</i>  | <i>Ethaliella floccata</i>  | AB505304 | Okinawa, Kyoda, Okinawa, Japan                     |
|                    | <i>Ethaliella floccata</i>  | AB505305 | Okinawa, Kyoda, Okinawa, Japan                     |
|                    | <i>Ethaliella floccata</i>  | EU530137 | Japan                                              |
| <i>Ethminolia</i>  | <i>Ethminolia stearnsii</i> | AB505306 | Chiba, Japan                                       |
|                    | <i>Ethminolia stearnsii</i> | AB505307 | Chiba, Japan                                       |
| <i>Eurytrochus</i> | <i>Eurytrochus cognatus</i> | AB505299 | Kumamoto, Amakusa, Tsuzizima, Japan                |
|                    | <i>Eurytrochus cognatus</i> | EU530133 | Japan                                              |
| <i>Hazuregyra</i>  | <i>Hazuregyra watanabei</i> | HF586245 | Off Kinkazan, Miyagi, Honshu, Honshu, Japan        |
| <i>Lirularia</i>   | <i>Lirularia iridescens</i> | EU530125 | Japan                                              |
|                    | <i>Lirularia iridescens</i> | EU530124 | Japan                                              |
|                    | <i>Lirularia pygmaea</i>    | AB505308 | Chiba, Japan                                       |
|                    | <i>Lirularia pygmaea</i>    | AB505309 | Chiba, Japan                                       |
| <i>Monilea</i>     | <i>Monilea smithi</i>       | AB505310 | Oita, Japan                                        |
|                    | <i>Monilea smithi</i>       | AB505311 | Oita, Japan                                        |
| <i>Monodonta</i>   | <i>Monodonta perplexa</i>   | DQ061096 | Hokkaido, Hokkaido, Japan                          |
|                    | <i>Monodonta canalifera</i> | DQ061095 | Okinawa, Okinawa, Japan                            |
|                    | <i>Monodonta canalifera</i> | EU530128 | Japan                                              |
|                    | <i>Monodonta australis</i>  | HM180693 | Korea                                              |
|                    | <i>Monodonta australis</i>  | HM180694 | Korea                                              |
|                    | <i>Monodonta australis</i>  | HM180695 | Korea                                              |
|                    | <i>Monodonta australis</i>  | HM180696 | Korea                                              |
|                    | <i>Monodonta australis</i>  | HM180697 | Korea                                              |
|                    | <i>Monodonta australis</i>  | HM180698 | Korea                                              |
|                    | <i>Monodonta australis</i>  | HM180699 | Korea                                              |
| <i>Omphalius</i>   | <i>Omphalius pfeifferi</i>  | HM180730 | Korea                                              |
|                    | <i>Omphalius pfeifferi</i>  | HM180731 | Korea                                              |
|                    | <i>Omphalius rusticus</i>   | HM180733 | Korea                                              |
|                    | <i>rusticus</i>             | HM180733 | Korea                                              |
|                    | <i>Omphalius rusticus</i>   | HM180734 | Korea                                              |

|               |             |                         |                                    |          |                                              |
|---------------|-------------|-------------------------|------------------------------------|----------|----------------------------------------------|
|               |             |                         | <i>rusticus</i>                    |          |                                              |
|               |             |                         | <i>Omphalius rusticus</i>          | HM180735 | Korea                                        |
|               |             | <i>Pseudostomatella</i> | <i>Pseudostomatella decolorata</i> | AB505290 | Okinawa, Benoki, Okinawa, Japan              |
|               |             |                         | <i>Pseudostomatella decolorata</i> | AB505291 | Okinawa, Benoki, Okinawa, Japan              |
|               |             | <i>Pteria</i>           | <i>Pteria breviaalata</i>          | KU341962 | Weizhou Island, Guangxi province, China      |
|               |             |                         | <i>Pteria penguin</i>              | KU341959 | Weizhou Island, Guangxi province, China      |
|               |             |                         | <i>Pteria penguin</i>              | KU341960 | Weizhou Island, Guangxi province, China      |
|               |             |                         | <i>Pteria penguin</i>              | KU341961 | Weizhou Island, Guangxi province, China      |
|               |             | <i>Rossiteria</i>       | <i>Rossiteria nuclea</i>           | AB505312 | Kagoshima, Japan                             |
|               |             | <i>Solariella</i>       | <i>Solariella nyssonus</i>         | HF586294 | E of Daiozaki, Mie, Honshu I., Honshu, Japan |
|               |             |                         | <i>Solariella nyssonus</i>         | HF586295 | Off Kanaya, Chiba, Honshu I., Honshu, Japan  |
|               |             |                         | <i>Stomatia obscura</i>            | AB505294 | Kagoshima, Japan                             |
|               |             |                         | <i>Stomatia phymotis</i>           | AB365223 | Okinawa, Ishigaki, Okinawa, Japan            |
|               |             | <i>Strombus</i>         | <i>Strombus vittatus</i>           | JF693433 | Weizhou Island, Guangxi province, China      |
|               |             |                         | <i>Strombus vittatus</i>           | JF693434 | Beibhai, Guangxi province, China             |
|               |             |                         | <i>Strombus vittatus</i>           | JF693435 | Beibhai, Guangxi province, China             |
|               |             | <i>Trochus</i>          | <i>Trochus histrio</i>             | AB505300 | Kagoshima, Japan                             |
|               |             |                         | <i>Trochus maculatus</i>           | EU530134 | Japan                                        |
|               |             |                         | <i>Trochus maculatus</i>           | AB365224 | Okinawa, Iriomote, Okinawa, Japan            |
|               |             |                         | <i>Trochus maculatus</i>           | AB505301 | Kagoshima, Japan                             |
|               |             |                         | <i>Trochus stellatus</i>           | EU530135 | Japan                                        |
|               |             | <i>Umbonium</i>         | <i>Umbonium giganteum</i>          | AB505314 | Shizuoka, Japan                              |
|               |             |                         | <i>Umbonium giganteum</i>          | AB505313 | Shizuoka, Japan                              |
|               |             |                         | <i>Umbonium moniliferum</i>        | AB505315 | Kumamoto, Yokakuwan, Japan                   |
|               |             |                         | <i>Umbonium moniliferum</i>        | AB365227 | Miyazaki, Japan                              |
| Cephalaspidea | Haminoeidae | <i>Haminoea</i>         | <i>Haminoea japonica</i>           | JN830658 | Japan                                        |
|               |             |                         | <i>Haminoea japonica</i>           | JN830657 | Japan                                        |
|               |             |                         | <i>Haminoea japonica</i>           | JN830656 | Japan                                        |
|               |             |                         | <i>Haminoea japonica</i>           | JN830655 | Japan                                        |

|                          |          |       |
|--------------------------|----------|-------|
| <i>Haminoea japonica</i> | JN830654 | Japan |
| <i>Haminoea japonica</i> | JN830653 | Japan |
| <i>Haminoea japonica</i> | JN830652 | Japan |
| <i>Haminoea japonica</i> | JN830651 | Japan |
| <i>Haminoea japonica</i> | JN830650 | Japan |
| <i>Haminoea japonica</i> | JN830649 | Japan |
| <i>Haminoea japonica</i> | JN830648 | Japan |
| <i>Haminoea japonica</i> | KF572952 | Japan |
| <i>Haminoea japonica</i> | KF572953 | Japan |
| <i>Haminoea japonica</i> | KF572954 | Japan |
| <i>Haminoea japonica</i> | KF572958 | Japan |
| <i>Haminoea japonica</i> | KF572959 | Japan |
| <i>Haminoea japonica</i> | KF572960 | Japan |
| <i>Haminoea japonica</i> | KF572961 | Japan |
| <i>Haminoea japonica</i> | KF572962 | Japan |
| <i>Haminoea japonica</i> | KF572963 | Japan |
| <i>Haminoea japonica</i> | KF572964 | Japan |
| <i>Haminoea japonica</i> | KF572965 | Japan |
| <i>Haminoea japonica</i> | KF572966 | Japan |
| <i>Haminoea japonica</i> | KF572967 | Japan |
| <i>Haminoea japonica</i> | KF572968 | Japan |
| <i>Haminoea japonica</i> | KF572969 | Japan |
| <i>Haminoea japonica</i> | KF572970 | Japan |
| <i>Haminoea japonica</i> | KF572971 | Japan |
| <i>Haminoea japonica</i> | KF572972 | Japan |
| <i>Haminoea japonica</i> | KF572973 | Japan |
| <i>Haminoea japonica</i> | KF572974 | Japan |
| <i>Haminoea japonica</i> | KF572975 | Japan |
| <i>Haminoea japonica</i> | KF572976 | Japan |
| <i>Haminoea japonica</i> | KF572977 | Japan |
| <i>Haminoea japonica</i> | KF572978 | Japan |

|           |                      |                               |          |       |
|-----------|----------------------|-------------------------------|----------|-------|
|           |                      | <i>Haminoea japonica</i>      | KF572979 | Japan |
|           |                      | <i>Haminoea japonica</i>      | KF572980 | Japan |
|           |                      | <i>Haminoea japonica</i>      | KF572981 | Japan |
|           |                      | <i>Haminoea japonica</i>      | KF572982 | Japan |
|           |                      | <i>Haminoea japonica</i>      | KF572983 | Japan |
|           |                      | <i>Haminoea japonica</i>      | KF572984 | Japan |
|           |                      | <i>Haminoea japonica</i>      | KF572985 | Japan |
|           |                      | <i>Haminoea japonica</i>      | KF572986 | Japan |
|           |                      | <i>Haminoea japonica</i>      | KF572987 | Japan |
|           |                      | <i>Haminoea japonica</i>      | KF572988 | Japan |
| Aglajidae | <i>Melanochlamys</i> | <i>Melanochlamys ezoensis</i> | KJ704899 | Japan |
|           |                      | <i>Melanochlamys ezoensis</i> | KJ704900 | Japan |
|           |                      | <i>Melanochlamys ezoensis</i> | KJ704901 | Japan |
|           |                      | <i>Melanochlamys ezoensis</i> | KJ704902 | Japan |
|           |                      | <i>Melanochlamys ezoensis</i> | KJ704903 | Japan |
|           |                      | <i>Melanochlamys ezoensis</i> | KJ704904 | Japan |
|           |                      | <i>Melanochlamys ezoensis</i> | KJ704905 | Japan |
|           |                      | <i>Melanochlamys fukudai</i>  | KJ704906 | Japan |
|           |                      | <i>Melanochlamys fukudai</i>  | KJ704907 | Japan |
|           |                      | <i>Melanochlamys fukudai</i>  | KJ704908 | Japan |
|           |                      | <i>Melanochlamys fukudai</i>  | KJ704909 | Japan |
|           |                      | <i>Melanochlamys fukudai</i>  | KJ704910 | Japan |
|           |                      | <i>Melanochlamys fukudai</i>  | KJ704911 | Japan |
|           |                      | <i>Melanochlamys fukudai</i>  | KJ704912 | Japan |
|           |                      | <i>Melanochlamys fukudai</i>  | KJ704913 | Japan |
|           |                      | <i>Melanochlamys fukudai</i>  | KJ704914 | Japan |
|           |                      | <i>Melanochlamys fukudai</i>  | KJ704915 | Japan |
|           |                      | <i>Melanochlamys fukudai</i>  | KJ704916 | Japan |
|           |                      | <i>Melanochlamys fukudai</i>  | KJ704917 | Japan |
|           |                      | <i>Melanochlamys fukudai</i>  | KJ704918 | Japan |
|           |                      | <i>Melanochlamys fukudai</i>  | KJ704919 | Japan |



|                   |              |                    |                                  |          |                                                    |
|-------------------|--------------|--------------------|----------------------------------|----------|----------------------------------------------------|
|                   |              |                    | <i>Melanochlamys fukudai</i>     | KJ704920 | Japan                                              |
|                   |              |                    | <i>Melanochlamys fukudai</i>     | KJ704921 | Japan                                              |
|                   |              |                    | <i>Melanochlamys fukudai</i>     | KJ704922 | Japan                                              |
|                   |              |                    | <i>Melanochlamys fukudai</i>     | KJ704923 | Japan                                              |
|                   |              |                    | <i>Melanochlamys fukudai</i>     | KJ704924 | Japan                                              |
|                   |              |                    | <i>Melanochlamys fukudai</i>     | KJ704925 | Japan                                              |
|                   |              |                    | <i>Melanochlamys fukudai</i>     | KJ704926 | Japan                                              |
|                   |              |                    | <i>Melanochlamys fukudai</i>     | KJ704927 | Japan                                              |
|                   |              |                    | <i>Melanochlamys fukudai</i>     | KJ704928 | Japan                                              |
|                   |              |                    | <i>Melanochlamys fukudai</i>     | KJ704929 | Japan                                              |
|                   |              |                    | <i>Melanochlamys fukudai</i>     | KJ704930 | Japan                                              |
|                   |              |                    | <i>Melanochlamys kohi</i>        | KJ704933 | Japan                                              |
|                   |              |                    | <i>Melanochlamys kohi</i>        | KJ704934 | Japan                                              |
|                   |              |                    | <i>Melanochlamys kohi</i>        | KJ704935 | Japan                                              |
| Cocculiniformia   | Cocculinidae | <i>Coccolpigya</i> | <i>Coccolpigya punctoradiata</i> | AB238590 | Kochi, Japan                                       |
|                   |              |                    | <i>Coccolpigya punctoradiata</i> | AB365259 | Miyazaki, Japan                                    |
| Cycloneritimorpha | Neritidae    | <i>Nerita</i>      | <i>Nerita albicilla</i>          | AM049327 | Okinawa Island, Okinawa Prefecture, Okinawa, Japan |
|                   |              |                    | <i>Nerita helicinoides</i>       | EU732252 | South of Cape Hedo, Okinawa, Okinawa, Japan        |
|                   |              |                    | <i>Nerita helicinoides</i>       | EU732251 | Cape Zanpa, Okinawa, Okinawa, Japan                |
|                   |              |                    | <i>Nerita japonica</i>           | EU732260 | Misaki, Miura Peninsula, Japan                     |
|                   |              |                    | <i>Nerita japonica</i>           | EU732259 | Misaki, Miura Peninsula, Japan                     |
|                   |              |                    | <i>Nerita ocellata</i>           | EU732280 | South of Oku, Okinawa, Okinawa, Japan              |
|                   |              |                    | <i>Nerita ocellata</i>           | EU732279 | South of Oku, Okinawa, Okinawa, Japan              |
|                   |              |                    | <i>Nerita planospira</i>         | EU732291 | Yagaji Jima, Okinawa, Okinawa, Japan               |
|                   |              |                    | <i>Nerita plicata</i>            | EU732293 | South of Oku, Okinawa, Okinawa, Japan              |
|                   |              |                    | <i>Nerita tristis</i>            | EU732324 | South of Oku, Okinawa, Okinawa, Japan              |
|                   |              |                    | <i>Nerita tristis</i>            | EU732323 | South of Oku, Okinawa, Okinawa, Japan              |
|                   |              |                    | <i>Nerita undata</i>             | EU732333 | Hong Kong, China                                   |
|                   |              |                    | <i>Nerita undata</i>             | EU732334 | Hong Kong, China                                   |
|                   |              |                    | <i>Nerita undata</i>             | EU732336 | South of Oku, Okinawa, Okinawa, Japan              |
|                   |              |                    | <i>Nerita undata</i>             | EU732335 | South of Oku, Okinawa, Okinawa, Japan              |

|                                 |            |                     |                                |          |                                                 |
|---------------------------------|------------|---------------------|--------------------------------|----------|-------------------------------------------------|
|                                 |            |                     | <i>Nerita undulata</i>         | EU732352 | Yagaji Jima, Okinawa, Okinawa, Japan            |
|                                 |            |                     | <i>Nerita undulata</i>         | EU732351 | Yagaji Jima, Okinawa, Okinawa, Japan            |
|                                 |            |                     | <i>Nerita yoldii</i>           | EU732359 | Hong Kong, China                                |
|                                 |            |                     | <i>Nerita yoldii</i>           | EU732360 | Hong Kong, China                                |
|                                 |            | <i>Neritina</i>     | <i>Neritina asperulata</i>     | AB477474 | Okinawa, Nago, Ooura, Okinawa, Japan            |
|                                 |            |                     | <i>Neritina asperulata</i>     | AB477473 | Okinawa, Iriomote Takana, Okinawa, Japan        |
|                                 |            |                     | <i>Neritina asperulata</i>     | AB477472 | Okinawa, Ishigaki Hoshino, Okinawa, Japan       |
|                                 |            |                     | <i>Neritina iris</i>           | AB477491 | Okinawa, Iriomote Takana, Okinawa, Japan        |
|                                 |            |                     | <i>Neritina iris</i>           | AB477490 | Kagoshima, Japan                                |
|                                 |            |                     | <i>Neritina petiti</i>         | AB477497 | Okinawa, Iriomote Takana, Okinawa, Japan        |
|                                 |            |                     | <i>Neritina petiti</i>         | AB477496 | Okinawa, Ishigaki Hoshino, Okinawa, Japan       |
|                                 |            |                     | <i>Neritina petiti</i>         | AB477495 | Okinawa, Ishigaki Hoshino, Okinawa, Japan       |
|                                 |            |                     | <i>Neritina pulligera</i>      | AB477502 | Okinawa, Ishigaki Hoshino, Okinawa, Japan       |
|                                 |            |                     | <i>Neritina pulligera</i>      | AB477501 | Kagoshima, Japan                                |
| Docoglossa                      | Patellidae | <i>Scutellastra</i> | <i>Scutellastra flexuosa</i>   | AB238583 | Wakayama, Japan                                 |
|                                 |            |                     | <i>Scutellastra optima</i>     | AB238585 | Kagoshima, Japan                                |
| Gastropoda_order_incertae_sedis | Turbinidae | <i>Angaria</i>      | <i>Angaria formosa</i>         | AM049342 | Sunabe, Okinawa Prefecture, Okinawa, Japan      |
|                                 |            |                     | <i>Angaria formosa</i>         | AM049343 | Hinomisaki, Wakayama Prefecture, Japan          |
|                                 |            | <i>Collonista</i>   | <i>Collonista amakusaensis</i> | AM049345 | Minatogawa, Okinawa Prefecture, Okinawa, Japan  |
|                                 |            |                     | <i>Collonista costulosa</i>    | AM049346 | Seragaki, Okinawa Prefecture, Okinawa, Japan    |
|                                 |            | <i>Gabrielona</i>   | <i>Gabrielona pisinna</i>      | AM049356 | Okinawa, Aguni Island, Okinawa, Japan           |
|                                 |            |                     | <i>Gabrielona pisinna</i>      | AM049357 | Okinawa, Aguni Island, Okinawa, Japan           |
|                                 |            | <i>Guildfordia</i>  | <i>Guildfordia triumphans</i>  | AM049375 | Sakai, Wakayama Prefecture, Japan               |
|                                 |            |                     | <i>Guildfordia triumphans</i>  | AM049376 | Straits of Koshiki, Kagoshima Pref. Japan       |
|                                 |            |                     | <i>Guildfordia yoka</i>        | AM049377 | Okinawa, I., Okinawa Prefecture, Okinawa, Japan |
|                                 |            |                     | <i>Guildfordia yoka</i>        | AM049378 | Okinawa, I., Okinawa Prefecture, Okinawa, Japan |
|                                 |            |                     | <i>Guildfordia yoka</i>        | EU530156 | Japan                                           |
|                                 |            | <i>Lunella</i>      | <i>Lunella cinerea</i>         | AB588872 | Okinawa, Iriomote Island, Okinawa, Japan        |
|                                 |            |                     | <i>Lunella cinerea</i>         | AB297735 | Okinawa, Iriomote Island, Okinawa, Japan        |
|                                 |            |                     | <i>Lunella cinerea</i>         | AB297734 | Okinawa, Iriomote Island, Okinawa, Japan        |
|                                 |            |                     | <i>Lunella cinerea</i>         | AB297733 | Okinawa, Iriomote Island, Okinawa, Japan        |

|                    |                             |          |                                                      |
|--------------------|-----------------------------|----------|------------------------------------------------------|
|                    | <i>Lunella coreensis</i>    | HQ681192 | Japan                                                |
|                    | <i>Lunella coreensis</i>    | HQ681191 | Japan                                                |
|                    | <i>Lunella coreensis</i>    | AM403861 | Nakanohama,Hazu-cho, Aichi Pref., Japan              |
|                    | <i>Lunella coreensis</i>    | AM403860 | Funagawaminato-kohama, Oga, Akita Pref, Japan        |
|                    | <i>Lunella coreensis</i>    | AB297732 | Aich, Morozaki, Japan                                |
|                    | <i>Lunella coreensis</i>    | AB297731 | Kagawa, Japan                                        |
|                    | <i>Lunella coreensis</i>    | AB297730 | Mie, Japan                                           |
|                    | <i>Lunella coreensis</i>    | HM180657 | Korea                                                |
|                    | <i>Lunella coreensis</i>    | HM180658 | Korea                                                |
|                    | <i>Lunella coreensis</i>    | HM180659 | Korea                                                |
|                    | <i>Lunella coronata</i>     | AB297729 | Okinawa, Yonashiro, Yakena, Japan                    |
|                    | <i>Lunella coronata</i>     | AB297728 | Okinawa, Yonashiro, Yakena, Japan                    |
|                    | <i>Lunella coronata</i>     | AB297727 | Okinawa, Yonashiro, Yakena, Japan                    |
|                    | <i>Lunella granulata</i>    | AM403863 | Hong Kong, China                                     |
|                    | <i>Lunella granulata</i>    | AB588892 | Kagoshima, Japan                                     |
|                    | <i>Lunella granulata</i>    | AB588891 | Japan                                                |
|                    | <i>Lunella granulata</i>    | AM403862 | Teruma Beach Yonashiro, Okinawa Pref, Okinawa, Japan |
|                    | <i>Lunella moniliformis</i> | AB588878 | Kagoshima, Japan                                     |
|                    | <i>Lunella moniliformis</i> | AB588877 | Kagoshima, Japan                                     |
|                    | <i>Lunella moniliformis</i> | AB588876 | Kagoshima, Japan                                     |
|                    | <i>Lunella ogasawarana</i>  | AB588883 | Bonin Is, Chichizima, Japan                          |
|                    | <i>Lunella ogasawarana</i>  | AB588882 | Bonin Is, Chichizima, Japan                          |
|                    | <i>Lunella ogasawarana</i>  | AB588881 | Bonin Is, Chichizima, Japan                          |
|                    | <i>Lunella ogasawarana</i>  | AB588880 | Bonin Is, Chichizima, Japan                          |
|                    | <i>Lunella ogasawarana</i>  | AB588879 | Bonin Is, Chichizima, Japan                          |
|                    | <i>Lunella ogasawarana</i>  | AB297723 | Tokyo, Ogasawara Islands, Chichi-jima, Japan         |
|                    | <i>Lunella ogasawarana</i>  | AB297725 | Tokyo, Ogasawara Islands, Chichi-jima, Japan         |
|                    | <i>Lunella ogasawarana</i>  | AB297724 | Tokyo, Ogasawara Islands, Chichi-jima, Japan         |
|                    | <i>Lunella ogasawarana</i>  | AB297726 | Tokyo, Ogasawara Islands, Chichi-jima, Japan         |
|                    | <i>Lunella ogasawarana</i>  | AB297722 | Tokyo, Ogasawara Islands, Chichi-jima, Japan         |
| <i>Phasianella</i> | <i>Phasianella solida</i>   | AM049353 | Chikura, Chiba Prefecture, Japan                     |

|                 |            |                 |                            |          |                                                      |
|-----------------|------------|-----------------|----------------------------|----------|------------------------------------------------------|
|                 |            |                 | <i>Phasianella solida</i>  | AM049354 | Tsubaki Onsen, Wakayama Prefecture, Japan            |
|                 |            | <i>Pomaulax</i> | <i>Pomaulax japonicus</i>  | AM049380 | KatsuuraChiba, Prefecture, Japan                     |
|                 |            |                 | <i>Pomaulax japonicus</i>  | AB297737 | Chiba, Japan                                         |
|                 |            | <i>Turbo</i>    | <i>Turbo argyrostomus</i>  | AM403899 | Itoman,Okinawa Pref., Okinawa, Japan                 |
|                 |            |                 | <i>Turbo chrysostomus</i>  | AM403903 | Iriomote I., Taketomi, Okinawa Pref. Japan           |
|                 |            |                 | <i>Turbo cornutus</i>      | AM403882 | Kii Nagashima, Mie Pref., Japan                      |
|                 |            |                 | <i>Turbo cornutus</i>      | AM403881 | Morozaki, Minamichita-cho, Aichi Pref., Japan        |
|                 |            |                 | <i>Turbo cornutus</i>      | HM180932 | Korea                                                |
|                 |            |                 | <i>Turbo cornutus</i>      | HM180933 | Korea                                                |
|                 |            |                 | <i>Turbo cornutus</i>      | HM180934 | Korea                                                |
|                 |            |                 | <i>Turbo marmoratus</i>    | AM403895 | Chinen, Okinawa Pref., Okinawa, Japan                |
|                 |            |                 | <i>Turbo marmoratus</i>    | AM403894 | Kin, Okinawa Pref., Okinawa, Japan                   |
|                 |            |                 | <i>Turbo petholatus</i>    | AM049383 | Seragaki,Okinawa Prefecture, Okinawa, Japan          |
|                 |            |                 | <i>Turbo reevii</i>        | AM403878 | Sakai, Minabe, Wakayama Pref., Japan                 |
|                 |            |                 | <i>Turbo setosus</i>       | AM403909 | Higashizaki, Yonaguni I., Okinawa Pref., Japan       |
|                 |            |                 | <i>Turbo stenogyrus</i>    | AM403916 | Teruma Beach Yonashiro, Okinawa Pref, Okinawa, Japan |
|                 |            |                 | <i>Turbo stenogyrus</i>    | AM403915 | HinomisakiHidaka, Wakayama, Pref, Japan              |
| Littorinimorpha | Bursidae   | <i>Bursa</i>    | <i>Bursa granularis</i>    | JF693344 | Fuzhou, Fujian province, China                       |
|                 |            |                 | <i>Bursa granularis</i>    | JF693345 | Rizhao, Shandong province, China                     |
|                 |            |                 | <i>Bursa granularis</i>    | JF693346 | Weizhou Island, Guangxi province, China              |
|                 |            |                 | <i>Bursa granularis</i>    | JF693347 | Fangchenggang, Guangxi province, China               |
|                 |            |                 | <i>Bursa granularis</i>    | JF693348 | Fangchenggang, Guangxi province, China               |
|                 |            |                 | <i>Bursa rana</i>          | JF693349 | Zhanjiang, Guangdong province, China                 |
|                 |            |                 | <i>Bursa rana</i>          | JF693350 | Beibhai, Guangxi province, China                     |
|                 |            |                 | <i>Bursa rana</i>          | JF693351 | Beibhai, Guangxi province, China                     |
|                 |            |                 | <i>Bursa rana</i>          | JF693352 | Pingtang, Fujian province, China                     |
|                 |            |                 | <i>Bursa rana</i>          | JF693353 | Pingtang, Fujian province, China                     |
|                 | Cassidae   | <i>Phalium</i>  | <i>Phalium bisulcatum</i>  | JF693409 | Fuqing, Fujian province, China                       |
|                 |            |                 | <i>Phalium flammiferum</i> | JF693410 | Fuqing, Fujian province, China                       |
|                 | Cypraeidae | <i>Cypraea</i>  | <i>Cypraea tigris</i>      | JF693369 | Paracel Islands, China                               |
|                 |            |                 | <i>Cypraea tigris</i>      | JF693370 | Paracel Islands, China                               |

|              |                        |                                   |          |                                         |
|--------------|------------------------|-----------------------------------|----------|-----------------------------------------|
|              |                        | <i>Cypraea vitellus</i>           | JF693371 | Lingao, Hainan province, China          |
|              | <i>Mauritia</i>        | <i>Mauritia arabica</i>           | JF693392 | Wenchang, Hainan province, China        |
|              |                        | <i>Mauritia arabica</i>           | JF693393 | Lingao, Hainan province, China          |
|              |                        | <i>Mauritia arabica</i>           | JF693394 | Lingao, Hainan province, China          |
|              |                        | <i>Mauritia arabica</i>           | JF693395 | Lingao, Hainan province, China          |
|              | <i>Erronea</i>         | <i>Erronea erronea</i>            | JF693396 | Lingao, Hainan province, China          |
|              |                        | <i>Erronea erronea</i>            | JF693397 | Weizhou Island, Guangxi province, China |
| Ficidae      | <i>Ficus</i>           | <i>Ficus ficus</i>                | JF693374 | Zhanjiang, Guangdong province, China    |
|              |                        | <i>Ficus ficus</i>                | JF693375 | Zhanjiang, Guangdong province, China    |
|              |                        | <i>Ficus ficus</i>                | JF693376 | Zhanjiang, Guangdong province, China    |
|              |                        | <i>Ficus gracilis</i>             | JF693380 | Sanya, Hainan province, China           |
|              |                        | <i>Ficus gracilis</i>             | JF693381 | Sanya, Hainan province, China           |
|              |                        | <i>Ficus gracilis</i>             | JF693382 | Beibu Bay, Guangxi province, China      |
|              |                        | <i>Ficus variegata</i>            | JF693377 | Zhanjiang, Guangdong province, China    |
|              |                        | <i>Ficus variegata</i>            | JF693378 | Zhanjiang, Guangdong province, China    |
|              |                        | <i>Ficus variegata</i>            | JF693379 | Zhanjiang, Guangdong province, China    |
| Littorinidae | <i>Echinolittorina</i> | <i>Echinolittorina cinerea</i>    | AJ622991 | Ogasawara Is, Chichijima I, Japan       |
|              |                        | <i>Echinolittorina radiata</i>    | JF693405 | Shengshan, Zhejiang province, China     |
|              |                        | <i>Echinolittorina radiata</i>    | JF693406 | Zhoushan, Zhejiang province, China      |
|              |                        | <i>Echinolittorina radiata</i>    | AJ623040 | Tsubaki, Wakayama, Japan                |
|              |                        | <i>Echinolittorina reticulata</i> | AJ623042 | Ishigaki, Japan                         |
|              |                        | <i>Echinolittorina reticulata</i> | AM157057 | Okinawa, Nago-shi, Okinawa, Japan       |
|              |                        | <i>Echinolittorina reticulata</i> | AM157058 | Okinawa, Nago-shi, Okinawa, Japan       |
|              |                        | <i>Echinolittorina reticulata</i> | AM157059 | Okinawa, Nago-shi, Okinawa, Japan       |
|              |                        | <i>Echinolittorina reticulata</i> | AM157060 | Okinawa, Nago-shi, Okinawa, Japan       |
|              |                        | <i>Echinolittorina reticulata</i> | AM157061 | Okinawa, Nago-shi, Okinawa, Japan       |
|              |                        | <i>Echinolittorina reticulata</i> | AM157062 | Okinawa, Nago-shi, Okinawa, Japan       |
|              |                        | <i>Echinolittorina reticulata</i> | AM157063 | Hachijo-jima, Mitsune, Japan            |
|              |                        | <i>Echinolittorina reticulata</i> | AM157064 | Ishigaki, Japan                         |
|              |                        | <i>Echinolittorina reticulata</i> | AM157065 | Ishigaki, Japan                         |
|              |                        | <i>Echinolittorina reticulata</i> | AM157066 | Ishigaki, Japan                         |

|                                        |          |                                       |
|----------------------------------------|----------|---------------------------------------|
| <i>Echinolittorina reticulata</i>      | AM157067 | Ishigaki, Japan                       |
| <i>Echinolittorina trochoides</i><br>A | AM157086 | Hong Kong, China                      |
| <i>Echinolittorina trochoides</i><br>E | AJ623057 | Tsubaki, Wakayama, Japan              |
| <i>Echinolittorina trochoides</i><br>E | AJ623058 | Japan                                 |
| <i>Echinolittorina trochoides</i><br>E | AM156817 | Japan                                 |
| <i>Echinolittorina trochoides</i><br>E | AM156818 | Mitsuishi, Kanagawa, Japan            |
| <i>Echinolittorina trochoides</i><br>E | AM156819 | Mitsuishi, Kanagawa, Japan            |
| <i>Echinolittorina trochoides</i><br>E | AM156820 | Nago-shi, Okinawa, Okinawa, Japan     |
| <i>Echinolittorina trochoides</i><br>E | AM156821 | Nago-shi, Okinawa, Okinawa, Japan     |
| <i>Echinolittorina trochoides</i><br>E | AM156822 | Nago-shi, Okinawa, Okinawa, Japan     |
| <i>Echinolittorina trochoides</i><br>E | AM156823 | Nakazato, Kikaijima, Kagoshima, Japan |
| <i>Echinolittorina trochoides</i><br>E | AM156824 | Nakazato, Kikaijima, Kagoshima, Japan |
| <i>Echinolittorina trochoides</i><br>E | AM156825 | Nakazato, Kikaijima, Kagoshima, Japan |
| <i>Echinolittorina trochoides</i><br>E | AM156826 | Shirahama, Wakayama, Japan            |
| <i>Echinolittorina trochoides</i><br>E | AM156827 | Shirahama, Wakayama, Japan            |
| <i>Echinolittorina trochoides</i><br>E | AM156828 | Mitsune, Hachijo-jima, Japan          |

|                   |                                               |          |                                              |
|-------------------|-----------------------------------------------|----------|----------------------------------------------|
|                   | <i>Echinolittorina trochoides</i><br><i>E</i> | AM156829 | Mitsune, Hachijo-jima, Japan                 |
|                   | <i>Echinolittorina trochoides</i><br><i>E</i> | AM156830 | Mitsune, Hachijo-jima, Japan                 |
|                   | <i>Echinolittorina trochoides</i><br><i>E</i> | AM156831 | Tsuchi-hama, Amami-oshima, Japan             |
|                   | <i>Echinolittorina trochoides</i><br><i>E</i> | AM156832 | Futami, Chichijima-hama, Amami-oshima, Japan |
|                   | <i>Echinolittorina trochoides</i><br><i>E</i> | AM156833 | Futami, Chichijima-hama, Amami-oshima, Japan |
|                   | <i>Echinolittorina trochoides</i><br><i>E</i> | AM156834 | Futami, Chichijima-hama, Amami-oshima, Japan |
|                   | <i>Echinolittorina trochoides</i><br><i>E</i> | AM156835 | Futami, Chichijima-hama, Amami-oshima, Japan |
|                   | <i>Echinolittorina vidua</i>                  | AM156986 | Hong Kong, China                             |
|                   | <i>Echinolittorina vidua</i>                  | AM156985 | Hong Kong, China                             |
|                   | <i>Echinolittorina vidua</i>                  | AM156984 | Hong Kong, China                             |
|                   | <i>Echinolittorina vidua</i>                  | AM156983 | Hong Kong, China                             |
|                   | <i>Echinolittorina vidua</i>                  | AM156982 | Hong Kong, China                             |
|                   | <i>Echinolittorina vidua</i>                  | AM156981 | Hong Kong, China                             |
|                   | <i>Echinolittorina vidua</i>                  | AM157002 | Okinawa, Nago-shi, Okinawa, Japan            |
|                   | <i>Echinolittorina vidua</i>                  | AM157003 | Okinawa, Nago-shi, Okinawa, Japan            |
|                   | <i>Echinolittorina vidua</i>                  | AM157004 | Okinawa, Nago-shi, Okinawa, Japan            |
|                   | <i>Echinolittorina vidua</i>                  | AM157005 | Okinawa, Nago-shi, Okinawa, Japan            |
|                   | <i>Echinolittorina vidua</i>                  | AM157006 | Okinawa, Nago-shi, Okinawa, Japan            |
|                   | <i>Echinolittorina vidua</i>                  | AM157007 | Okinawa, Nago-shi, Okinawa, Japan            |
|                   | <i>Echinolittorina vidua</i>                  | AM157008 | Okinawa, Nago-shi, Okinawa, Japan            |
|                   | <i>Echinolittorina vidua</i>                  | AM157009 | Okinawa, Nago-shi, Okinawa, Japan            |
| <i>Littoraria</i> | <i>Littoraria coccinea</i>                    | FN557093 | Ishigaki I., Japan                           |
|                   | <i>Littoraria intermedia</i>                  | FN557104 | Kyushu, Miyazaki, Kushima, Honjo R., Japan   |
|                   | <i>Littoraria intermedia</i>                  | JF693389 | Lingao, Hainan province, China               |

|            |                  |                               |          |                                                             |
|------------|------------------|-------------------------------|----------|-------------------------------------------------------------|
|            |                  | <i>Littoraria intermedia</i>  | JF693390 | Fuqing, Fujian province, China                              |
|            |                  | <i>Littoraria melanostoma</i> | HE590830 | Hong Kong, China                                            |
|            |                  | <i>Littoraria pallescens</i>  | FN557122 | Makiya, Okinawa, Japan                                      |
|            |                  | <i>Littoraria pallescens</i>  | AB611831 | Okinawa, Nago, Okinawa, Japan                               |
|            |                  | <i>Littoraria pintado</i>     | AJ488634 | Ishigaki Island, Japan                                      |
|            |                  | <i>Littoraria scabra</i>      | FN557135 | Naha, Okinawa, Japan                                        |
|            |                  | <i>Littoraria scabra</i>      | JF693391 | Rongcheng, Shandong province, China                         |
|            |                  | <i>Littoraria sinensis</i>    | FN557140 | Kyushu, Miyazaki, Kushima, Honjo R., Japan                  |
|            | <i>Littorina</i> | <i>Littorina brevicula</i>    | JF693387 | Rizhao, Shandong province, China                            |
|            |                  | <i>Littorina brevicula</i>    | JF693386 | Fuqing, Fujian province, China                              |
|            |                  | <i>Littorina brevicula</i>    | JF693388 | Rongcheng, Shandong province, China                         |
|            |                  | <i>Littorina brevicula</i>    | HE590833 | Goura, , Japan                                              |
|            |                  | <i>Littorina horikawai</i>    | HE590836 | Nejiko, Hirad I., Kyushu, Japan                             |
|            |                  | <i>Littorina kasatka</i>      | HE590837 | Hokkaido Akkeshi Marine Biological Station, Hokkaido, Japan |
|            |                  | <i>Littorina mandshurica</i>  | HE590838 | Abashiri, Hokkaido, Hokkaido, Japan                         |
|            |                  | <i>Littorina squalida</i>     | HE590843 | Abashiri, Hokkaido, Hokkaido, Japan                         |
|            | <i>Tectarius</i> | <i>Tectarius spinulosus</i>   | AJ488641 | Ishigaki, Japan                                             |
|            |                  | <i>Tectarius spinulosus</i>   | AB611827 | Kagoshima, Japan                                            |
| Naticidae  | <i>Natica</i>    | <i>Natica lineata</i>         | JF693401 | Zhanjiang, Guangdong province, China                        |
|            |                  | <i>Natica lineata</i>         | JF693402 | Zhanjiang, Guangdong province, China                        |
|            |                  | <i>Natica lineata</i>         | JF693404 | Zhanjiang, Guangdong province, China                        |
|            |                  | <i>Natica lineata</i>         | JF693403 | Zhanjiang, Guangdong province, China                        |
|            |                  | <i>Natica tigrina</i>         | JF693400 | Beibhai, Guangxi province, China                            |
| Personidae | <i>Distorsio</i> | <i>Distorsio reticularis</i>  | JF693372 | Beibhai, Guangxi province, China                            |
|            |                  | <i>Distorsio reticularis</i>  | JF693373 | Beibhai, Guangxi province, China                            |
| Ranellidae | <i>Cymatium</i>  | <i>Cymatium cingulatum</i>    | JF693367 | Sanya, Hainan province, China                               |
|            |                  | <i>Cymatium cingulatum</i>    | JF693368 | Sanya, Hainan province, China                               |
| Strombidae | <i>Lambis</i>    | <i>Lambis lambis</i>          | JF693383 | Sanya, Hainan province, China                               |
|            |                  | <i>Lambis lambis</i>          | JF693384 | Sanya, Hainan province, China                               |
|            |                  | <i>Lambis lambis</i>          | JF693385 | Sanya, Hainan province, China                               |



|               |            |                      |                               |          |                                      |
|---------------|------------|----------------------|-------------------------------|----------|--------------------------------------|
|               |            | <i>Strombus</i>      | <i>Strombus lentiginosu</i>   | JF693421 | Lingshui, Hainan province, China     |
|               |            |                      | <i>Strombus lentiginosu</i>   | JF693422 | Paracel Islands, China               |
|               |            |                      | <i>Strombus luhuanus</i>      | JF693429 | Wenchang, Hainan province, China     |
|               |            |                      | <i>Strombus luhuanus</i>      | JF693430 | Wenchang, Hainan province, China     |
|               |            |                      | <i>Strombus luhuanus</i>      | JF693431 | Wenchang, Hainan province, China     |
|               |            |                      | <i>Strombus luhuanus</i>      | JF693432 | Wenchang, Hainan province, China     |
|               |            |                      | <i>Strombus mutabiis</i>      | JF693420 | Lingshui, Hainan province, China     |
|               |            |                      | <i>Strombus urceus</i>        | JF693423 | Wenchang, Hainan province, China     |
|               |            |                      | <i>Strombus urceus</i>        | JF693424 | Wenchang, Hainan province, China     |
|               |            |                      | <i>Strombus urceus</i>        | JF693425 | Wenchang, Hainan province, China     |
|               |            | <i>Margistrombus</i> | <i>Margistrombus robustus</i> | JF693426 | Beibhai, Guangxi province, China     |
|               |            |                      | <i>Margistrombus robustus</i> | JF693427 | Beibhai, Guangxi province, China     |
|               |            |                      | <i>Margistrombus robustus</i> | JF693428 | Beibhai, Guangxi province, China     |
|               |            |                      | <i>Margistrombus robustus</i> | JF693436 | Beibhai, Guangxi province, China     |
|               |            |                      | <i>Margistrombus robustus</i> | JF693437 | Beibhai, Guangxi province, China     |
|               | Tonnidae   | <i>Tonna</i>         | <i>Tonna dolium</i>           | JF693441 | Zhanjiang, Guangdong province, China |
|               |            |                      | <i>Tonna dolium</i>           | JF693442 | Zhanjiang, Guangdong province, China |
|               |            |                      | <i>Tonna galea</i>            | JF693438 | Haikou, Hainan province, China       |
|               |            |                      | <i>Tonna galea</i>            | JF693439 | Haikou, Hainan province, China       |
|               |            |                      | <i>Tonna sulcosa</i>          | JF693440 | Beibhai, Guangxi province, China     |
| Neogastropoda | Buccinidae | <i>Babylonia</i>     | <i>Babylonia areolata</i>     | JN053011 | Fuqing, Fujian province, China       |
|               |            |                      | <i>Babylonia areolata</i>     | HQ834066 | Fuqing, Fujian province, China       |
|               |            |                      | <i>Babylonia areolata</i>     | JN053013 | Fuqing, Fujian province, China       |
|               |            |                      | <i>Babylonia areolata</i>     | JN053012 | Fuqing, Fujian province, China       |
|               |            |                      | <i>Babylonia lutosa</i>       | JN053010 | Fuqing, Fujian province, China       |
|               |            | <i>Buccinum</i>      | <i>Buccinum pemphigum</i>     | JN052999 | Dalian, Liaoning province, China     |
|               |            |                      | <i>Buccinum pemphigum</i>     | JN053000 | Dalian, Liaoning province, China     |
|               |            |                      | <i>Buccinum pemphigum</i>     | JN053001 | Dalian, Liaoning province, China     |
|               |            |                      | <i>Buccinum pemphigum</i>     | HQ834057 | Dalian, Liaoning province, China     |
|               |            |                      | <i>Buccinum pemphigum</i>     | HQ834058 | Dalian, Liaoning province, China     |
|               |            |                      | <i>Buccinum pemphigum</i>     | HQ834059 | Dalian, Liaoning province, China     |

|                  |                               |          |                                        |
|------------------|-------------------------------|----------|----------------------------------------|
|                  | <i>Buccinum yokomaru</i>      | JN052995 | Dalian, Liaoning province, China       |
|                  | <i>Buccinum yokomaru</i>      | JN052996 | Dalian, Liaoning province, China       |
|                  | <i>Buccinum yokomaru</i>      | JN052997 | Dalian, Liaoning province, China       |
|                  | <i>Buccinum yokomaru</i>      | JN052998 | Dalian, Liaoning province, China       |
| <i>Cantharus</i> | <i>Cantharus cecillei</i>     | HQ834063 | Fangchenggang, Guangxi province, China |
|                  | <i>Cantharus cecillei</i>     | JN053007 | Fangchenggang, Guangxi province, China |
|                  | <i>Cantharus melanostomus</i> | JN053038 | Sanya, Hainan province, China          |
|                  | <i>Cantharus melanostomus</i> | HQ834062 | Sanya, Hainan province, China          |
| <i>Golikovia</i> | <i>Golikovia ennae</i>        | AB498779 | Fukushima, Japan                       |
|                  | <i>Golikovia fukueae</i>      | AB498780 | Nagasaki, Hirazisone, Japan            |
|                  | <i>Neptunea arthritica</i>    | AB498778 | Fukushima, Japan                       |
|                  | <i>Neptunea arthritica</i>    | AB498777 | Miyagi, Shitigahama, Japan             |
|                  | <i>Neptunea arthritica</i>    | AB498776 | Miyagi, Shitigahama, Japan             |
| <i>Kelletia</i>  | <i>Kelletia lischkei</i>      | HM180632 | Korea                                  |
|                  | <i>Kelletia lischkei</i>      | HM180633 | Korea                                  |
|                  | <i>Kelletia lischkei</i>      | HM180634 | Korea                                  |
|                  | <i>Kelletia lischkei</i>      | HM180635 | Korea                                  |
|                  | <i>Kelletia lischkei</i>      | HM180636 | Korea                                  |
| <i>Neptunea</i>  | <i>Neptunea constricta</i>    | AB498766 | Fukushima, Japan                       |
|                  | <i>Neptunea cumingi</i>       | HQ834061 | Qingdao, Shandong province, China      |
|                  | <i>Neptunea cumingi</i>       | JN053006 | Qingdao, Shandong province, China      |
|                  | <i>Neptunea cumingi</i>       | JN053005 | Qingdao, Shandong province, China      |
|                  | <i>Neptunea cumingi</i>       | HM180715 | Korea                                  |
|                  | <i>Neptunea cumingi</i>       | HM180716 | Korea                                  |
|                  | <i>Neptunea frater</i>        | AB498769 | Fukushima, Japan                       |
|                  | <i>Neptunea frater</i>        | AB498768 | Fukushima, Japan                       |
|                  | <i>Neptunea frater</i>        | AB498767 | Fukushima, Japan                       |
|                  | <i>Neptunea intersculpta</i>  | AB498771 | Fukushima, Japan                       |
|                  | <i>Neptunea intersculpta</i>  | AB498770 | Fukushima, Japan                       |
|                  | <i>Neptunea kuroshio</i>      | AB498772 | Shizuoka, Japan                        |
|                  | <i>Neptunea mikawaensis</i>   | AB498773 | Shizuoka, Japan                        |

|               |                   |                                     |          |                                      |
|---------------|-------------------|-------------------------------------|----------|--------------------------------------|
|               |                   | <i>Neptunea polycostata</i>         | AB498775 | Hokkaido, Samani, Hokkaido, Japan    |
|               |                   | <i>Neptunea polycostata</i>         | AB498774 | Hokkaido, Samani, Hokkaido, Japan    |
|               | <i>Phos</i>       | <i>Phos senticosus</i>              | JN053008 | Beibhai, Guangxi province, China     |
|               |                   | <i>Phos senticosus</i>              | JN053009 | Beibhai, Guangxi province, China     |
|               |                   | <i>Phos senticosus</i>              | HQ834064 | Beibhai, Guangxi province, China     |
|               |                   | <i>Phos senticosus</i>              | HQ834065 | Beibhai, Guangxi province, China     |
|               | <i>Volutharpa</i> | <i>Volutharpa ampullacea perryi</i> | JN053002 | Rizhao, Shandong province, China     |
|               |                   | <i>Volutharpa ampullacea perryi</i> | HQ834060 | Rizhao, Shandong province, China     |
|               |                   | <i>Volutharpa ampullacea perryi</i> | JN053004 | Rizhao, Shandong province, China     |
|               |                   | <i>Volutharpa ampullacea perryi</i> | JN053003 | Rizhao, Shandong province, China     |
| Clavatulidae  | <i>Turricula</i>  | <i>Turricula javana</i>             | HQ834091 | Lianyungang, Jiangsu province, China |
| Columbellidae | <i>Euplica</i>    | <i>Euplica scripta</i>              | HQ834054 | Beibhai, Guangxi province, China     |
|               |                   | <i>Euplica scripta</i>              | JN052987 | Beibhai, Guangxi province, China     |
|               |                   | <i>Euplica scripta</i>              | JN052986 | Beibhai, Guangxi province, China     |
|               |                   | <i>Euplica scripta</i>              | JN052985 | Beibhai, Guangxi province, China     |
|               | <i>Mitrella</i>   | <i>Mitrella bicincta</i>            | HQ834055 | Yantai, Shandong province, China     |
|               |                   | <i>Mitrella bicincta</i>            | JN052991 | Yantai, Shandong province, China     |
|               |                   | <i>Mitrella bicincta</i>            | JN052990 | Yantai, Shandong province, China     |
|               |                   | <i>Mitrella bicincta</i>            | JN052989 | Yantai, Shandong province, China     |
|               |                   | <i>Mitrella bicincta</i>            | JN052988 | Yantai, Shandong province, China     |
|               |                   | <i>Mitrella bicincta</i>            | HM180683 | Korea                                |
|               |                   | <i>Mitrella bicincta</i>            | HM180684 | Korea                                |
|               |                   | <i>Mitrella bicincta</i>            | HM180685 | Korea                                |
|               |                   | <i>Mitrella bicincta</i>            | HM180686 | Korea                                |
|               |                   | <i>Mitrella bicincta</i>            | HM180687 | Korea                                |
|               |                   | <i>Mitrella bicincta</i>            | HM180688 | Korea                                |
|               |                   | <i>Mitrella bicincta</i>            | HM180689 | Korea                                |

|         |              |                           |          |                                      |
|---------|--------------|---------------------------|----------|--------------------------------------|
|         |              | <i>Mitrella bicincta</i>  | HM180690 | Korea                                |
|         |              | <i>Mitrella bicincta</i>  | HM180691 | Korea                                |
|         |              | <i>Mitrella bicincta</i>  | HM180692 | Korea                                |
|         |              | <i>Mitrella burchardi</i> | HQ834098 | Zhoushan, Zhejiang province, China   |
|         |              | <i>Mitrella burchardi</i> | JN053028 | Zhoushan, Zhejiang province, China   |
| Conidae | <i>Conus</i> | <i>Conus aristophanes</i> | HQ834101 | Beibhai, Guangxi province, China     |
|         |              | <i>Conus betulinus</i>    | HQ834088 | Zhanjiang, Guangdong province, China |
|         |              | <i>Conus betulinus</i>    | JN053043 | Zhanjiang, Guangdong province, China |
|         |              | <i>Conus ebraeus</i>      | EF547576 | Okinawa, Okinawa, Japan              |
|         |              | <i>Conus ebraeus</i>      | EF547575 | Okinawa, Okinawa, Japan              |
|         |              | <i>Conus ebraeus</i>      | EF547574 | Okinawa, Okinawa, Japan              |
|         |              | <i>Conus ebraeus</i>      | EF547573 | Okinawa, Okinawa, Japan              |
|         |              | <i>Conus ebraeus</i>      | EF547572 | Okinawa, Okinawa, Japan              |
|         |              | <i>Conus ebraeus</i>      | EF547571 | Okinawa, Okinawa, Japan              |
|         |              | <i>Conus ebraeus</i>      | EF547570 | Okinawa, Okinawa, Japan              |
|         |              | <i>Conus ebraeus</i>      | EF547569 | Okinawa, Okinawa, Japan              |
|         |              | <i>Conus ebraeus</i>      | EF547568 | Okinawa, Okinawa, Japan              |
|         |              | <i>Conus ebraeus</i>      | EF547567 | Okinawa, Okinawa, Japan              |
|         |              | <i>Conus ebraeus</i>      | EF547566 | Okinawa, Okinawa, Japan              |
|         |              | <i>Conus ebraeus</i>      | EF547565 | Okinawa, Okinawa, Japan              |
|         |              | <i>Conus ebraeus</i>      | EF547564 | Okinawa, Okinawa, Japan              |
|         |              | <i>Conus ebraeus</i>      | EF547563 | Okinawa, Okinawa, Japan              |
|         |              | <i>Conus ebraeus</i>      | EF547562 | Okinawa, Okinawa, Japan              |
|         |              | <i>Conus ebraeus</i>      | EF547561 | Okinawa, Okinawa, Japan              |
|         |              | <i>Conus ebraeus</i>      | EF547560 | Okinawa, Okinawa, Japan              |
|         |              | <i>Conus ebraeus</i>      | EF547559 | Okinawa, Okinawa, Japan              |
|         |              | <i>Conus judaeus</i>      | EF108266 | Japan                                |
|         |              | <i>Conus lividus</i>      | HQ852576 | Okinawa, Okinawa, Japan              |
|         |              | <i>Conus lividus</i>      | HQ852577 | Okinawa, Okinawa, Japan              |
|         |              | <i>Conus lividus</i>      | HQ852575 | Okinawa, Okinawa, Japan              |
|         |              | <i>Conus quercinus</i>    | HQ834087 | Sanya, Hainan province, China        |

|                |                  |                             |          |                                      |
|----------------|------------------|-----------------------------|----------|--------------------------------------|
|                |                  | <i>Conus sanguinolentus</i> | HQ834090 | Qionghai, Hainan province, China     |
|                |                  | <i>Conus sanguinolentus</i> | HQ852532 | Okinawa, Okinawa, Japan              |
|                |                  | <i>Conus sanguinolentus</i> | HQ852530 | Okinawa, Okinawa, Japan              |
|                |                  | <i>Conus sanguinolentus</i> | HQ852528 | Okinawa, Okinawa, Japan              |
|                |                  | <i>Conus sanguinolentus</i> | HQ852526 | Okinawa, Okinawa, Japan              |
|                |                  | <i>Conus sanguinolentus</i> | HQ852524 | Okinawa, Okinawa, Japan              |
|                |                  | <i>Conus sanguinolentus</i> | HQ852522 | Okinawa, Okinawa, Japan              |
|                |                  | <i>Conus sanguinolentus</i> | HQ852520 | Okinawa, Okinawa, Japan              |
|                |                  | <i>Conus sanguinolentus</i> | HQ852533 | Okinawa, Okinawa, Japan              |
|                |                  | <i>Conus sanguinolentus</i> | HQ852529 | Okinawa, Okinawa, Japan              |
|                |                  | <i>Conus sanguinolentus</i> | HQ852531 | Okinawa, Okinawa, Japan              |
|                |                  | <i>Conus sanguinolentus</i> | HQ852527 | Okinawa, Okinawa, Japan              |
|                |                  | <i>Conus sanguinolentus</i> | HQ852525 | Okinawa, Okinawa, Japan              |
|                |                  | <i>Conus sanguinolentus</i> | HQ852523 | Okinawa, Okinawa, Japan              |
|                |                  | <i>Conus sanguinolentus</i> | HQ852521 | Okinawa, Okinawa, Japan              |
|                |                  | <i>Conus textile</i>        | HQ834089 | Qionghai, Hainan province, China     |
| Fasciolariidae | <i>Fusinus</i>   | <i>Fusinus forceps</i>      | HM180580 | Korea                                |
|                |                  | <i>Fusinus forceps</i>      | HM180581 | Korea                                |
|                |                  | <i>Fusinus forceps</i>      | HM180582 | Korea                                |
|                |                  | <i>Fusinus forceps</i>      | HM180583 | Korea                                |
|                |                  | <i>Fusinus forceps</i>      | HM180584 | Korea                                |
|                |                  | <i>Fusinus longicaudus</i>  | HQ834100 | Zhangzhou, Fujian province, China    |
|                |                  | <i>Fusinus longicaudus</i>  | HQ834099 | Lianyungang, Jiangsu province, China |
|                |                  | <i>Fusinus longicaudus</i>  | HM180585 | Korea                                |
| Melongenidae   | <i>Hemifusus</i> | <i>Hemifusus colosseus</i>  | HQ834068 | Beibhai, Guangxi province, China     |
|                |                  | <i>Hemifusus colosseus</i>  | JN053018 | Beibhai, Guangxi province, China     |
|                |                  | <i>Hemifusus ternatanus</i> | HQ834067 | Lianyungang, Jiangsu province, China |
|                |                  | <i>Hemifusus ternatanus</i> | JN053017 | Lianyungang, Jiangsu province, China |
|                |                  | <i>Hemifusus ternatanus</i> | JN053016 | Lianyungang, Jiangsu province, China |
|                |                  | <i>Hemifusus ternatanus</i> | JN053015 | Lianyungang, Jiangsu province, China |
|                |                  | <i>Hemifusus ternatanus</i> | JN053014 | Lianyungang, Jiangsu province, China |

|           |                              |                              |                              |                                      |       |
|-----------|------------------------------|------------------------------|------------------------------|--------------------------------------|-------|
|           |                              | <i>Hemifusus ternatanus</i>  | HM180607                     | Korea                                |       |
|           |                              | <i>Hemifusus ternatanus</i>  | HM180608                     | Korea                                |       |
|           |                              | <i>Hemifusus ternatanus</i>  | HM180609                     | Korea                                |       |
|           |                              | <i>Hemifusus tuba</i>        | HQ834070                     | Beibhai, Guangxi province, China     |       |
|           |                              | <i>Hemifusus tuba</i>        | HQ834069                     | Zhanjiang, Guangdong province, China |       |
|           |                              | <i>Hemifusus tuba</i>        | JN053024                     | Zhanjiang, Guangdong province, China |       |
|           |                              | <i>Hemifusus tuba</i>        | JN053023                     | Zhanjiang, Guangdong province, China |       |
|           |                              | <i>Hemifusus tuba</i>        | JN053022                     | Zhanjiang, Guangdong province, China |       |
|           |                              | <i>Hemifusus tuba</i>        | JN053021                     | Zhanjiang, Guangdong province, China |       |
|           |                              | <i>Hemifusus tuba</i>        | JN053020                     | Zhanjiang, Guangdong province, China |       |
|           |                              | <i>Hemifusus tuba</i>        | JN053019                     | Zhanjiang, Guangdong province, China |       |
| Muricidae | <i>Boreotrophon</i>          | <i>Boreotrophon xestra</i>   | HQ834056                     | Dalian, Liaoning province, China     |       |
|           |                              | <i>Boreotrophon xestra</i>   | JN052994                     | Dalian, Liaoning province, China     |       |
|           |                              | <i>Boreotrophon xestra</i>   | JN052993                     | Dalian, Liaoning province, China     |       |
|           |                              | <i>Boreotrophon xestra</i>   | JN052992                     | Dalian, Liaoning province, China     |       |
|           |                              | <i>Ceratostoma</i>           | <i>Ceratostoma rorifluum</i> | HM180413                             | Korea |
|           |                              |                              | <i>Ceratostoma rorifluum</i> | HM180494                             | Korea |
|           | <i>Ceratostoma rorifluum</i> |                              | GU188257                     | Rongcheng, Shandong province, China  |       |
|           | <i>Ceratostoma rorifluum</i> |                              | GU188258                     | Rongcheng, Shandong province, China  |       |
|           | <i>Ceratostoma rorifluum</i> |                              | GU188259                     | Rongcheng, Shandong province, China  |       |
|           | <i>Ceratostoma rorifluum</i> |                              | GU188260                     | Yantai, Shandong province, China     |       |
|           | <i>Ceratostoma rorifluum</i> |                              | GU188261                     | Rongcheng, Shandong province, China  |       |
|           | <i>Ceratostoma rorifluum</i> |                              | GU188262                     | Rongcheng, Shandong province, China  |       |
|           | <i>Chicoreus</i>             | <i>Chicoreus asianus</i>     | GU188200                     | Beibhai, Guangxi province, China     |       |
|           |                              | <i>Chicoreus asianus</i>     | GU188201                     | Beibhai, Guangxi province, China     |       |
|           |                              | <i>Chicoreus asianus</i>     | GU188202                     | Beibhai, Guangxi province, China     |       |
|           |                              | <i>Chicoreus asianus</i>     | GU188203                     | Beibhai, Guangxi province, China     |       |
|           |                              | <i>Chicoreus asianus</i>     | GU188204                     | Lingao, Hainan province, China       |       |
|           |                              | <i>Chicoreus asianus</i>     | GU188205                     | Pingtang, Fujian province, China     |       |
|           |                              | <i>Chicoreus torrefactus</i> | GU188208                     | Beibhai, Guangxi province, China     |       |
|           |                              | <i>Chicoreus torrefactus</i> | GU188209                     | Beibhai, Guangxi province, China     |       |

|                 |                               |          |                                  |
|-----------------|-------------------------------|----------|----------------------------------|
|                 | <i>Chicoreus torrefactus</i>  | GU188210 | Beibhai, Guangxi province, China |
|                 | <i>Chicoreus torrefactus</i>  | GU188211 | Wenchang, Hainan province, China |
| <i>Drupa</i>    | <i>Drupa albolabris</i>       | HE584499 | Tsuchihama, Kasari, Amami, Japan |
|                 | <i>Drupa albolabris</i>       | HE584498 | Chichijima, Ogasawara Is, Japan  |
|                 | <i>Drupa grossularia</i>      | HE584488 | Amami-O-Shima, Ryukyu Is, Japan  |
|                 | <i>Drupa rubusidaeus</i>      | HE584527 | Kakeroma, Ryukyu Is, Japan       |
|                 | <i>Drupa rubusidaeus</i>      | HE584526 | Okinawa, Okinawa, Japan          |
| <i>Drupella</i> | <i>Drupella cornus</i>        | FR853820 | Sakihara Is., Japan              |
|                 | <i>Drupella eburnea</i>       | FR853828 | Sakaematsu, Kyushu Is, Japan     |
|                 | <i>Drupella fragum</i>        | FR853892 | FukushimaOita Pref., Japan       |
|                 | <i>Drupella fragum</i>        | FR853890 | FukushimaOita Pref., Japan       |
|                 | <i>Drupella fragum</i>        | FR853888 | FukushimaOita Pref., Japan       |
|                 | <i>Drupella fragum</i>        | FR853886 | FukushimaOita Pref., Japan       |
|                 | <i>Drupella fragum</i>        | FR853884 | FukushimaOita Pref., Japan       |
|                 | <i>Drupella fragum</i>        | FR853846 | FukushimaOita Pref., Japan       |
|                 | <i>Drupella fragum</i>        | FR853891 | FukushimaOita Pref., Japan       |
|                 | <i>Drupella fragum</i>        | FR853889 | FukushimaOita Pref., Japan       |
|                 | <i>Drupella fragum</i>        | FR853887 | FukushimaOita Pref., Japan       |
|                 | <i>Drupella fragum</i>        | FR853885 | FukushimaOita Pref., Japan       |
|                 | <i>Drupella fragum</i>        | FR853847 | FukushimaOita Pref., Japan       |
|                 | <i>Drupella fragum</i>        | FR853845 | FukushimaOita Pref., Japan       |
|                 | <i>Drupella margariticola</i> | JN053037 | Sanya, Hainan province, China    |
|                 | <i>Drupella margariticola</i> | JN053036 | Sanya, Hainan province, China    |
|                 | <i>Drupella margariticola</i> | GU188268 | Beibhai, Guangxi province, China |
|                 | <i>Drupella margariticola</i> | GU188269 | Beibhai, Guangxi province, China |
|                 | <i>Drupella margariticola</i> | GU188270 | Sanya, Hainan province, China    |
|                 | <i>Drupella margariticola</i> | GU188271 | Sanya, Hainan province, China    |
|                 | <i>Drupella margariticola</i> | FR853858 | Hong Kong, China                 |
|                 | <i>Drupella margariticola</i> | FR853859 | Hong Kong, China                 |
|                 | <i>Drupella margariticola</i> | FR853857 | Hong Kong, China                 |
|                 | <i>Drupella margariticola</i> | FR853823 | Hong Kong, China                 |

|                   |                               |          |                                     |
|-------------------|-------------------------------|----------|-------------------------------------|
|                   | <i>Drupella margariticola</i> | FR853862 | Kyushu, Japan                       |
|                   | <i>Drupella margariticola</i> | FR853860 | Kyushu Is., Japan                   |
|                   | <i>Drupella margariticola</i> | FR853861 | Amami Is, Japan                     |
|                   | <i>Drupella rugosa</i>        | FR853848 | Hong Kong, China                    |
|                   | <i>Drupella rugosa</i>        | FR853838 | Hong Kong, China                    |
|                   | <i>Drupella rugosa</i>        | FR853836 | Hong Kong, China                    |
|                   | <i>Drupella rugosa</i>        | FR853834 | Hong Kong, China                    |
|                   | <i>Drupella rugosa</i>        | FR853832 | Hong Kong, China                    |
|                   | <i>Drupella rugosa</i>        | FR853837 | Hong Kong, China                    |
|                   | <i>Drupella rugosa</i>        | FR853835 | Hong Kong, China                    |
|                   | <i>Drupella rugosa</i>        | FR853833 | Hong Kong, China                    |
|                   | <i>Drupella rugosa</i>        | FR853831 | Hong Kong, China                    |
|                   | <i>Drupella rugosa</i>        | FR853829 | Kyushu Is., Japan                   |
|                   | <i>Drupella rugosa</i>        | FR853827 | Kyushu Is., Japan                   |
| <i>Mancinella</i> | <i>Mancinella echinata</i>    | HE584343 | Fukushima, Japan                    |
|                   | <i>Mancinella siro</i>        | HE584344 | Kagoshima, Japan                    |
| <i>Morula</i>     | <i>Morula funiculata</i>      | HE584047 | Miyake Is., Japan                   |
|                   | <i>Morula funiculata</i>      | HE584046 | FukushimaOita Pref., Japan          |
|                   | <i>Morula funiculata</i>      | HE584045 | Amami Is, Japan                     |
|                   | <i>Morula granulata</i>       | JN053032 | Sanya, Hainan province, China       |
|                   | <i>Morula granulata</i>       | JN053031 | Sanya, Hainan province, China       |
|                   | <i>Morula granulata</i>       | JN053030 | Sanya, Hainan province, China       |
|                   | <i>Morula granulata</i>       | JN053029 | Sanya, Hainan province, China       |
|                   | <i>Morula japonica</i>        | HE584023 | Sakihara Is. ,Amami Is, Japan       |
|                   | <i>Morula purpureocincta</i>  | HE584049 | Kunigami, Okinawa, Japan            |
|                   | <i>Morula rugosa</i>          | JN053034 | Sanya, Hainan province, China       |
|                   | <i>Morula rugosa</i>          | JN053033 | Sanya, Hainan province, China       |
|                   | <i>Morula rumphiusi</i>       | HE584019 | Yakushima I.,Kyushu, Japan          |
|                   | <i>Morula spinosa</i>         | HE584026 | Miyazaki, Japan                     |
|                   | <i>Morula spinosa</i>         | HE584025 | Kagoshima, Japan                    |
|                   | <i>Morula striata</i>         | HE584028 | Yaeyama Is, Okinawa, Okinawa, Japan |



|                     |                               |          |                                      |
|---------------------|-------------------------------|----------|--------------------------------------|
|                     | <i>Morula striata</i>         | HE584027 | Sakihara Is. ,Amami Is, Japan        |
|                     | <i>Morula zebrina</i>         | HE584033 | Yakushima I.,Kyushu, Japan           |
| <i>Murex</i>        | <i>Murex trapa</i>            | GU188195 | Beibhai, Guangxi province, China     |
|                     | <i>Murex trapa</i>            | GU188196 | Beibhai, Guangxi province, China     |
|                     | <i>Murex trapa</i>            | GU188197 | Beibhai, Guangxi province, China     |
|                     | <i>Murex trapa</i>            | GU188198 | Beibhai, Guangxi province, China     |
|                     | <i>Murex trapa</i>            | GU188199 | Beibhai, Guangxi province, China     |
| <i>Nucella</i>      | <i>Nucella freycinetii</i>    | AB743761 | Erimo, Japan                         |
|                     | <i>Nucella freycinetii</i>    | AB743760 | Erimo, Japan                         |
|                     | <i>Nucella freycinetii</i>    | AB743759 | Erimo, Japan                         |
|                     | <i>Nucella freycinetii</i>    | AB743758 | Erimo, Japan                         |
|                     | <i>Nucella freycinetii</i>    | AB743757 | Erimo, Japan                         |
|                     | <i>Nucella freycinetii</i>    | AB743756 | Erimo, Japan                         |
| <i>Ocinebrellus</i> | <i>Ocinebrellus inornatus</i> | HM180491 | Korea                                |
|                     | <i>Ocinebrellus inornatus</i> | HM180492 | Korea                                |
|                     | <i>Ocinebrellus inornatus</i> | HM180493 | Korea                                |
| <i>Rapana</i>       | <i>Rapana bezoar</i>          | FN677421 | Tosa Bay, Japan                      |
|                     | <i>Rapana bezoar</i>          | GU188166 | Wenchang, Hainan province, China     |
|                     | <i>Rapana bezoar</i>          | GU188167 | Zhanjiang, Guangdong province, China |
|                     | <i>Rapana bezoar</i>          | GU188168 | Zhanjiang, Guangdong province, China |
|                     | <i>Rapana bezoar</i>          | GU188169 | Zhanjiang, Guangdong province, China |
|                     | <i>Rapana bezoar</i>          | GU188170 | Yangjiang, Guangdong province, China |
|                     | <i>Rapana rapiformis</i>      | GU188189 | Beibhai, Guangxi province, China     |
|                     | <i>Rapana rapiformis</i>      | GU188190 | Haikou, Hainan province, China       |
|                     | <i>Rapana rapiformis</i>      | GU188191 | Haikou, Hainan province, China       |
|                     | <i>Rapana rapiformis</i>      | GU188192 | Haikou, Hainan province, China       |
|                     | <i>Rapana rapiformis</i>      | GU188193 | Haikou, Hainan province, China       |
|                     | <i>Rapana rapiformis</i>      | GU188194 | Haikou, Hainan province, China       |
|                     | <i>Rapana venosa</i>          | HM180814 | Korea                                |
|                     | <i>Rapana venosa</i>          | HM180815 | Korea                                |
|                     | <i>Rapana venosa</i>          | HM180816 | Korea                                |

|                |                         |          |                                              |
|----------------|-------------------------|----------|----------------------------------------------|
|                | <i>Rapana venosa</i>    | GU188175 | Ganyu, Jiangsu province, China               |
|                | <i>Rapana venosa</i>    | GU188176 | Ganyu, Jiangsu province, China               |
|                | <i>Rapana venosa</i>    | GU188177 | Lianyungang, Jiangsu province, China         |
|                | <i>Rapana venosa</i>    | GU188178 | Lianyungang, Jiangsu province, China         |
|                | <i>Rapana venosa</i>    | GU188179 | Lianyungang, Jiangsu province, China         |
|                | <i>Rapana venosa</i>    | HE584367 | Kumamoto, Kyushu, Japan                      |
| <i>Reishia</i> | <i>Reishia bronni</i>   | HE584369 | Miyazaki, Kyushu Is, Japan                   |
|                | <i>Reishia bronni</i>   | HE584368 | Izu Is, Miyake I., Japan                     |
|                | <i>Reishia bronni</i>   | FR695722 | Kanagawa Pier, Miura City, Aburatsubo, Japan |
| <i>Thais</i>   | <i>Thais clavigera</i>  | GU188218 | Shengsi, Zhejiang province, China            |
|                | <i>Thais clavigera</i>  | GU188213 | Fangchenggang, Guangxi province, China       |
|                | <i>Thais clavigera</i>  | GU188214 | Rizhao, Shandong province, China             |
|                | <i>Thais clavigera</i>  | GU188212 | Zhanjiang, Guangdong province, China         |
|                | <i>Thais clavigera</i>  | GU188216 | Zhanjiang, Guangdong province, China         |
|                | <i>Thais clavigera</i>  | GU188217 | Qingdao, Shandong province, China            |
|                | <i>Thais clavigera</i>  | HM180817 | Korea                                        |
|                | <i>Thais clavigera</i>  | HM180818 | Korea                                        |
|                | <i>Thais clavigera</i>  | HM180819 | Korea                                        |
|                | <i>Thais clavigera</i>  | HM180820 | Korea                                        |
|                | <i>Thais clavigera</i>  | HM180821 | Korea                                        |
|                | <i>Thais gradata</i>    | GU188228 | Fangchenggang, Guangxi province, China       |
|                | <i>Thais gradata</i>    | GU188229 | Beibhai, Guangxi province, China             |
|                | <i>Thais javanica</i>   | GU188230 | Lingao, Hainan province, China               |
|                | <i>Thais javanica</i>   | GU188231 | Lingao, Hainan province, China               |
|                | <i>Thais luteostoma</i> | HM180822 | Korea                                        |
|                | <i>Thais luteostoma</i> | HM180823 | Korea                                        |
|                | <i>Thais luteostoma</i> | HM180824 | Korea                                        |
|                | <i>Thais luteostoma</i> | HM180825 | Korea                                        |
|                | <i>Thais luteostoma</i> | HM180826 | Korea                                        |
|                | <i>Thais luteostoma</i> | HM180827 | Korea                                        |
|                | <i>Thais luteostoma</i> | HM180828 | Korea                                        |

|             |                  |                             |          |                                        |
|-------------|------------------|-----------------------------|----------|----------------------------------------|
|             |                  | <i>Thais luteostoma</i>     | HM180829 | Korea                                  |
|             |                  | <i>Thais luteostoma</i>     | HM180830 | Korea                                  |
|             |                  | <i>Thais luteostoma</i>     | HM180831 | Korea                                  |
|             |                  | <i>Thais luteostoma</i>     | GU188232 | Shengsi, Zhejiang province, China      |
|             |                  | <i>Thais luteostoma</i>     | GU188233 | Shengsi, Zhejiang province, China      |
|             |                  | <i>Thais luteostoma</i>     | GU188234 | Nanji, Zhejiang province, China        |
|             |                  | <i>Thais luteostoma</i>     | GU188235 | Fangchenggang, Guangxi province, China |
|             |                  | <i>Thais luteostoma</i>     | GU188236 | Rizhao, Shandong province, China       |
|             |                  | <i>Thais luteostoma</i>     | GU188237 | Rizhao, Shandong province, China       |
|             |                  | <i>Thais luteostoma</i>     | HE584372 | Hong Kong, China                       |
|             |                  | <i>Thais mutabilis</i>      | GU188248 | Beibhai, Guangxi province, China       |
|             |                  | <i>Thais mutabilis</i>      | GU188249 | Beibhai, Guangxi province, China       |
|             |                  | <i>Thais mutabilis</i>      | GU188250 | Beibhai, Guangxi province, China       |
|             |                  | <i>Thais mutabilis</i>      | GU188251 | Beibhai, Guangxi province, China       |
|             |                  | <i>Thais mutabilis</i>      | GU188252 | Lianyungang, Jiangsu province, China   |
|             |                  | <i>Thais mutabilis</i>      | GU188253 | Lianyungang, Jiangsu province, China   |
| Nassariidae | <i>Nassarius</i> | <i>Nassarius conoidalis</i> | JQ975567 | China                                  |
|             |                  | <i>Nassarius conoidalis</i> | JQ975566 | China                                  |
|             |                  | <i>Nassarius conoidalis</i> | JQ975565 | China                                  |
|             |                  | <i>Nassarius dorsatus</i>   | JQ975553 | China                                  |
|             |                  | <i>Nassarius dorsatus</i>   | JQ975554 | China                                  |
|             |                  | <i>Nassarius festivus</i>   | JQ975456 | Qingdao, Shandong province, China      |
|             |                  | <i>Nassarius festivus</i>   | JQ975460 | Qingdao, Shandong province, China      |
|             |                  | <i>Nassarius festivus</i>   | JQ975459 | Qingdao, Shandong province, China      |
|             |                  | <i>Nassarius festivus</i>   | JQ975458 | Qingdao, Shandong province, China      |
|             |                  | <i>Nassarius festivus</i>   | JQ975457 | Qingdao, Shandong province, China      |
|             |                  | <i>Nassarius festivus</i>   | JQ975455 | Qingdao, Shandong province, China      |
|             |                  | <i>Nassarius hepaticus</i>  | JQ975487 | Zhanjiang, Guangdong province, China   |
|             |                  | <i>Nassarius hepaticus</i>  | JQ975491 | Zhanjiang, Guangdong province, China   |
|             |                  | <i>Nassarius hepaticus</i>  | JQ975490 | Zhanjiang, Guangdong province, China   |
|             |                  | <i>Nassarius hepaticus</i>  | JQ975489 | Zhanjiang, Guangdong province, China   |

|               |                    |                                |          |                                        |
|---------------|--------------------|--------------------------------|----------|----------------------------------------|
|               |                    | <i>Nassarius hepaticus</i>     | JQ975488 | Zhanjiang, Guangdong province, China   |
|               |                    | <i>Nassarius hepaticus</i>     | JQ975486 | Zhanjiang, Guangdong province, China   |
|               |                    | <i>Nassarius livescens</i>     | JQ975514 | China                                  |
|               |                    | <i>Nassarius livescens</i>     | JQ975515 | China                                  |
|               |                    | <i>Nassarius livescens</i>     | JQ975516 | China                                  |
|               |                    | <i>Nassarius livescens</i>     | JQ975517 | China                                  |
|               |                    | <i>Nassarius pullus</i>        | JQ975561 | China                                  |
|               |                    | <i>Nassarius pullus</i>        | JQ975560 | China                                  |
|               |                    | <i>Nassarius pullus</i>        | JQ975559 | China                                  |
|               |                    | <i>Nassarius pullus</i>        | JQ975558 | China                                  |
|               |                    | <i>Nassarius pullus</i>        | JQ975557 | China                                  |
|               |                    | <i>Nassarius pullus</i>        | JQ975556 | China                                  |
|               |                    | <i>Nassarius pullus</i>        | JQ975555 | China                                  |
|               |                    | <i>Nassarius semiplicatus</i>  | JQ975564 | China                                  |
|               |                    | <i>Nassarius semiplicatus</i>  | JQ975563 | China                                  |
|               |                    | <i>Nassarius siquijorensis</i> | JQ975552 | Zhanjiang, Guangdong province, China   |
|               |                    | <i>Nassarius siquijorensis</i> | HQ834076 | Zhanjiang, Guangdong province, China   |
|               |                    | <i>Nassarius siquijorensis</i> | JN053047 | Zhanjiang, Guangdong province, China   |
|               | <i>Varicinassa</i> | <i>Varicinassa variciferus</i> | JQ975551 | China                                  |
|               |                    | <i>Varicinassa variciferus</i> | JQ975546 | China                                  |
|               |                    | <i>Varicinassa variciferus</i> | JQ975547 | China                                  |
|               |                    | <i>Varicinassa variciferus</i> | JQ975548 | China                                  |
|               |                    | <i>Varicinassa variciferus</i> | JQ975549 | China                                  |
|               |                    | <i>Varicinassa variciferus</i> | JQ975550 | China                                  |
| Terebridae    | <i>Duplicaria</i>  | <i>Duplicaria dussumieri</i>   | HQ834094 | Lianyungang, Jiangsu province, China   |
| Turbinellidae | <i>Vasum</i>       | <i>Vasum turbinellus</i>       | JN053025 | Sanya, Hainan province, China          |
|               |                    | <i>Vasum turbinellus</i>       | HQ834084 | Sanya, Hainan province, China          |
| Turridae      | <i>Gemmula</i>     | <i>Gemmula deshayesii</i>      | HQ834092 | Rizhao, Shandong province, China       |
| Volutidae     | <i>Melo</i>        | <i>Melo melo</i>               | JN053026 | Fangchenggang, Guangxi province, China |
|               |                    | <i>Melo melo</i>               | HQ834086 | Fangchenggang, Guangxi province, China |
|               |                    | <i>Melo melo</i>               | HQ834085 | Fangchenggang, Guangxi province, China |

|                   |                         |                            |                                       |                         |                                        |
|-------------------|-------------------------|----------------------------|---------------------------------------|-------------------------|----------------------------------------|
| Neritoida         | Neritiliidae            | <i>Neritilia</i>           | <i>Melo melo</i>                      | JN053027                | Fangchenggang, Guangxi province, China |
|                   |                         |                            | <i>Neritilia littoralis</i>           | AB102710                | Amami-ohshima, Hienhama, Japan         |
|                   |                         |                            | <i>Neritilia mimotoi</i>              | AB102711                | Kagoshima, Japan                       |
|                   |                         |                            | <i>Neritilia rubida</i>               | AB102712                | Amami-ohshima, Yuwangama, Japan        |
| Nudibranchia      | Aeolidiidae             | <i>Anteaeolidiella</i>     | <i>Anteaeolidiella takanosimensis</i> | JX087530                | Japan                                  |
|                   |                         |                            | <i>Anteaeolidiella takanosimensis</i> | JX087529                | Japan                                  |
|                   |                         |                            | <i>Protaeolidiella</i>                |                         |                                        |
|                   |                         |                            | <i>Protaeolidiella atra</i>           | KP143676                | Japan                                  |
|                   |                         |                            | <i>Protaeolidiella atra</i>           | KP143675                | Japan                                  |
|                   |                         |                            |                                       |                         |                                        |
|                   | Dorididae               | <i>Cryptobranchia</i>      | <i>Cryptobranchia kuragiensis</i>     | AB543974                | Hokkaido, Akkeshi, Hokkaido, Japan     |
|                   |                         |                            | <i>Cryptobranchia kuragiensis</i>     | AB238457                | Hokkaido, Akkeshi, Hokkaido, Japan     |
|                   |                         |                            |                                       |                         |                                        |
|                   |                         |                            |                                       |                         |                                        |
|                   | Polyceridae             | <i>Roboastra</i>           | <i>Roboastra gracilis</i>             | EF142863                | Okinawa, Okinawa, Japan                |
|                   |                         |                            | <i>Roboastra luteolineata</i>         | EF142861                | Okinawa, Okinawa, Japan                |
|                   |                         |                            |                                       |                         |                                        |
| <i>Tambja</i>     |                         | <i>Tambja amakusana</i>    | EF142877                              | Okinawa, Okinawa, Japan |                                        |
|                   |                         | <i>Tambja limaciformis</i> | EF142878                              | Okinawa, Okinawa, Japan |                                        |
|                   |                         | <i>Tambja morosa</i>       | EF142867                              | Okinawa, Okinawa, Japan |                                        |
|                   | <i>Tambja sagamiana</i> | EF142870                   | Okinawa, Okinawa, Japan               |                         |                                        |
| Patellogastropoda | Acmaeidae               | <i>Notoacmea</i>           | <i>Notoacmea schrenckii</i>           | HM180719                | Korea                                  |
|                   |                         |                            | <i>Notoacmea schrenckii</i>           | HM180720                | Korea                                  |
|                   |                         |                            | <i>Notoacmea schrenckii</i>           | HM180721                | Korea                                  |
|                   |                         |                            | <i>Notoacmea schrenckii</i>           | HM180722                | Korea                                  |
|                   |                         |                            | <i>Notoacmea schrenckii</i>           | HM180723                | Korea                                  |
|                   |                         |                            | <i>Notoacmea schrenckii</i>           | HM180724                | Korea                                  |
|                   |                         |                            |                                       |                         |                                        |
|                   |                         |                            |                                       |                         |                                        |
|                   | Lottiidae               | <i>Lottia</i>              | <i>Lottia cassis</i>                  | KM221034                | Rongcheng, Shandong province, China    |
|                   |                         |                            | <i>Lottia cassis</i>                  | KM221036                | Rongcheng, Shandong province, China    |
|                   |                         |                            | <i>Lottia cassis</i>                  | KM221042                | Rongcheng, Shandong province, China    |
|                   |                         |                            | <i>Lottia cassis</i>                  | KM221043                | Rongcheng, Shandong province, China    |
|                   |                         |                            | <i>Lottia cassis</i>                  | KM221115                | Rongcheng, Shandong province, China    |
|                   |                         |                            |                                       |                         |                                        |

|                    |                                 |          |                                      |
|--------------------|---------------------------------|----------|--------------------------------------|
|                    | <i>Lottia cassis</i>            | KM221116 | Rongcheng, Shandong province, China  |
|                    | <i>Lottia dorsuosa</i>          | KM221054 | Zhoushan, Zhejiang province, China   |
|                    | <i>Lottia dorsuosa</i>          | KM221109 | Zhoushan, Zhejiang province, China   |
|                    | <i>Lottia dorsuosa</i>          | KM221108 | Zhoushan, Zhejiang province, China   |
|                    | <i>Lottia kogamogai</i>         | AB238467 | Ibaraki, Japan                       |
|                    | <i>Lottia langfordi</i>         | AB238468 | Kochi, Goshikinohama, Japan          |
|                    | <i>Lottia lindbergi</i>         | AB238470 | Hokkaido, Akkeshi, Hokkaido, Japan   |
|                    | <i>Lottia luchuana</i>          | KM221056 | Nanji, Zhejiang province, China      |
|                    | <i>Lottia luchuana</i>          | KM221094 | Yangjiang, Guangdong province, China |
|                    | <i>Lottia luchuana</i>          | KM221044 | Beibu Bay, Guangxi province, China   |
|                    | <i>Lottia luchuana</i>          | KM221045 | Beibu Bay, Guangxi province, China   |
|                    | <i>Lottia luchuana</i>          | KM221048 | Beibu Bay, Guangxi province, China   |
|                    | <i>Lottia luchuana</i>          | KM221049 | Beibu Bay, Guangxi province, China   |
|                    | <i>Lottia luchuana</i>          | KM221101 | Wenchang, Hainan province, China     |
|                    | <i>Lottia luchuana</i>          | KM221100 | Wenchang, Hainan province, China     |
|                    | <i>Lottia luchuana</i>          | AB238471 | Okinawa, Ogimi, Okinawa, Japan       |
|                    | <i>Lottia tenuisculpta</i>      | AB238482 | Mie, Japan                           |
| <i>Nipponacmea</i> | <i>Nipponacmea concinna</i>     | KM221103 | Fuqing, Fujian province, China       |
|                    | <i>Nipponacmea fuscoviridis</i> | KF953455 | China                                |
|                    | <i>Nipponacmea fuscoviridis</i> | KF953456 | China                                |
|                    | <i>Nipponacmea fuscoviridis</i> | KF953457 | China                                |
|                    | <i>Nipponacmea fuscoviridis</i> | KF953458 | China                                |
|                    | <i>Nipponacmea fuscoviridis</i> | KF953459 | China                                |
|                    | <i>Nipponacmea gloriosa</i>     | AB238488 | Shizuoka, Japan                      |
|                    | <i>Nipponacmea habei</i>        | AB238489 | Iwate, Yamada, Japan                 |
|                    | <i>Nipponacmea nigrans</i>      | KF953202 | China                                |
|                    | <i>Nipponacmea nigrans</i>      | KF953204 | China                                |
|                    | <i>Nipponacmea nigrans</i>      | KF953205 | China                                |
|                    | <i>Nipponacmea nigrans</i>      | KF953206 | China                                |
|                    | <i>Nipponacmea nigrans</i>      | KF953207 | China                                |
|                    | <i>Nipponacmea nigrans</i>      | AB238490 | Ibaraki, Japan                       |

|                   |                               |          |                                     |
|-------------------|-------------------------------|----------|-------------------------------------|
|                   | <i>Nipponacmea radula</i>     | KF953288 | China                               |
|                   | <i>Nipponacmea radula</i>     | KF953289 | China                               |
|                   | <i>Nipponacmea radula</i>     | KF953290 | China                               |
|                   | <i>Nipponacmea radula</i>     | KF953291 | China                               |
|                   | <i>Nipponacmea radula</i>     | KF953292 | China                               |
|                   | <i>Nipponacmea radula</i>     | AB238491 | Kagoshima, Japan                    |
|                   | <i>Nipponacmea schrenckii</i> | KM221040 | Rongcheng, Shandong province, China |
|                   | <i>Nipponacmea schrenckii</i> | KM221114 | Rongcheng, Shandong province, China |
|                   | <i>Nipponacmea schrenckii</i> | KM221128 | Qingdao, Shandong province, China   |
|                   | <i>Nipponacmea schrenckii</i> | KM221130 | Qingdao, Shandong province, China   |
|                   | <i>Nipponacmea schrenckii</i> | KM221131 | Qingdao, Shandong province, China   |
|                   | <i>Nipponacmea schrenckii</i> | KM221123 | Qingdao, Shandong province, China   |
|                   | <i>Nipponacmea teramachii</i> | AB238493 | Mie, Japan                          |
| <i>Patelloida</i> | <i>Patelloida conulus</i>     | AB161565 | Aich, Tahara, Shiokawa, Japan       |
|                   | <i>Patelloida conulus</i>     | AB161566 | Aich, Isshiki, Japan                |
|                   | <i>Patelloida conulus</i>     | AB161567 | Oita, Japan                         |
|                   | <i>Patelloida conulus</i>     | AB161568 | Hiroshima, Fukuyama, Japan          |
|                   | <i>Patelloida conulus</i>     | AB161569 | Kumamoto, Matsushima, Japan         |
|                   | <i>Patelloida conulus</i>     | AB161570 | Kumamoto, Hondo, Japan              |
|                   | <i>Patelloida conulus</i>     | AB161571 | Nagasaki, Minamikushiyama, Japan    |
|                   | <i>Patelloida conulus</i>     | AB161572 | Kumamoto, Reihoku, Tomioka, Japan   |
|                   | <i>Patelloida conulus</i>     | AB161573 | Fukuoka, Tsuyazaki, Japan           |
|                   | <i>Patelloida conulus</i>     | AB161574 | Fukuoka, Tsuyazaki, Japan           |
|                   | <i>Patelloida conulus</i>     | AB161604 | Aich, Tahara, Shiokawa, Japan       |
|                   | <i>Patelloida conulus</i>     | AB161605 | Aich, Tahara, Shiokawa, Japan       |
|                   | <i>Patelloida conulus</i>     | AB161606 | Aich, Tahara, Shiokawa, Japan       |
|                   | <i>Patelloida conulus</i>     | AB161607 | Aich, Tahara, Shiokawa, Japan       |
|                   | <i>Patelloida conulus</i>     | AB161608 | Aich, Tahara, Shiokawa, Japan       |
|                   | <i>Patelloida conulus</i>     | AB161609 | Aich, Tahara, Shiokawa, Japan       |
|                   | <i>Patelloida conulus</i>     | AB161610 | Aich, Tahara, Shiokawa, Japan       |
|                   | <i>Patelloida conulus</i>     | AB161611 | Aich, Tahara, Shiokawa, Japan       |

|                               |          |                                 |
|-------------------------------|----------|---------------------------------|
| <i>Patelloida conulus</i>     | AB161612 | Aich, Tahara, Shiokawa, Japan   |
| <i>Patelloida conulus</i>     | AB161613 | Aich, Tahara, Shiokawa, Japan   |
| <i>Patelloida conulus</i>     | AB161614 | Aich, Tahara, Shiokawa, Japan   |
| <i>Patelloida conulus</i>     | AB161615 | Aich, Tahara, Shiokawa, Japan   |
| <i>Patelloida conulus</i>     | AB161616 | Aich, Tahara, Shiokawa, Japan   |
| <i>Patelloida conulus</i>     | AB161617 | Aich, Tahara, Shiokawa, Japan   |
| <i>Patelloida conulus</i>     | AB238514 | Aich, Tahara, Japan             |
| <i>Patelloida heroldi</i>     | AB161575 | Mie, Japan                      |
| <i>Patelloida heroldi</i>     | AB161576 | Wakayama, Japan                 |
| <i>Patelloida heroldi</i>     | AB161577 | Kanagawa, Hayama, Japan         |
| <i>Patelloida heroldi</i>     | AB161578 | Kochi, Tosa, Usa, Japan         |
| <i>Patelloida heroldi</i>     | AB161579 | Kagawa, Japan                   |
| <i>Patelloida heroldi</i>     | AB161580 | Aich, Hazu, Nakanohama, Japan   |
| <i>Patelloida heroldi</i>     | AB161581 | Kanagawa, Miura, Japan          |
| <i>Patelloida heroldi</i>     | AB161582 | Wakayama, Japan                 |
| <i>Patelloida heroldi</i>     | AB161618 | Aich, Hazu, Nakanohama, Japan   |
| <i>Patelloida heroldi</i>     | AB161619 | Aich, Hazu, Nakanohama, Japan   |
| <i>Patelloida heroldi</i>     | AB161620 | Aich, Hazu, Nakanohama, Japan   |
| <i>Patelloida heroldi</i>     | AB161621 | Aich, Hazu, Nakanohama, Japan   |
| <i>Patelloida heroldi</i>     | AB161622 | Aich, Hazu, Nakanohama, Japan   |
| <i>Patelloida heroldi</i>     | AB161623 | Aich, Hazu, Nakanohama, Japan   |
| <i>Patelloida heroldi</i>     | AB161624 | Aich, Hazu, Nakanohama, Japan   |
| <i>Patelloida heroldi</i>     | AB161625 | Aich, Hazu, Nakanohama, Japan   |
| <i>Patelloida heroldi</i>     | AB161626 | Aich, Hazu, Nakanohama, Japan   |
| <i>Patelloida heroldi</i>     | AB161627 | Aich, Hazu, Nakanohama, Japan   |
| <i>Patelloida heroldi</i>     | AB161628 | Aich, Hazu, Nakanohama, Japan   |
| <i>Patelloida heroldi</i>     | AB161629 | Aich, Hazu, Nakanohama, Japan   |
| <i>Patelloida heroldi</i>     | AB161630 | Aich, Hazu, Nakanohama, Japan   |
| <i>Patelloida heroldi</i>     | AB161631 | Aich, Hazu, Nakanohama, Japan   |
| <i>Patelloida lentiginosa</i> | AB238517 | Okinawa, Benoki, Okinawa, Japan |
| <i>Patelloida pygmaea</i>     | AB161552 | Aich, Tahara, Shiokawa, Japan   |



|                           |          |                                     |
|---------------------------|----------|-------------------------------------|
| <i>Patelloida pygmaea</i> | AB161553 | Yamaguchi, Esaki, Japan             |
| <i>Patelloida pygmaea</i> | AB161554 | Fukushima, Japan                    |
| <i>Patelloida pygmaea</i> | AB161555 | Ehime, Misho, Japan                 |
| <i>Patelloida pygmaea</i> | AB161556 | Nagasaki, Tsushima, Japan           |
| <i>Patelloida pygmaea</i> | AB161557 | Chiba, Japan                        |
| <i>Patelloida pygmaea</i> | AB161560 | Wakayama, Japan                     |
| <i>Patelloida pygmaea</i> | AB161561 | Fukuoka, Tsuyazaki, Japan           |
| <i>Patelloida pygmaea</i> | AB161558 | Okayama, Japan                      |
| <i>Patelloida pygmaea</i> | AB161559 | Hiroshima, Fukuyama, Japan          |
| <i>Patelloida pygmaea</i> | AB161562 | Kumamoto, Hondo, Japan              |
| <i>Patelloida pygmaea</i> | AB161563 | Kumamoto, Kawaura, Japan            |
| <i>Patelloida pygmaea</i> | AB161564 | Kumamoto, Matsushima, Japan         |
| <i>Patelloida pygmaea</i> | AB161590 | Aich, Tahara, Shiokawa, Japan       |
| <i>Patelloida pygmaea</i> | AB161591 | Aich, Tahara, Shiokawa, Japan       |
| <i>Patelloida pygmaea</i> | AB161592 | Aich, Tahara, Shiokawa, Japan       |
| <i>Patelloida pygmaea</i> | AB161593 | Aich, Tahara, Shiokawa, Japan       |
| <i>Patelloida pygmaea</i> | AB161594 | Aich, Tahara, Shiokawa, Japan       |
| <i>Patelloida pygmaea</i> | AB161595 | Aich, Tahara, Shiokawa, Japan       |
| <i>Patelloida pygmaea</i> | AB161596 | Aich, Tahara, Shiokawa, Japan       |
| <i>Patelloida pygmaea</i> | AB161599 | Aich, Tahara, Shiokawa, Japan       |
| <i>Patelloida pygmaea</i> | AB161600 | Aich, Tahara, Shiokawa, Japan       |
| <i>Patelloida pygmaea</i> | AB161601 | Aich, Tahara, Shiokawa, Japan       |
| <i>Patelloida pygmaea</i> | AB161602 | Aich, Tahara, Shiokawa, Japan       |
| <i>Patelloida pygmaea</i> | AB161603 | Aich, Tahara, Shiokawa, Japan       |
| <i>Patelloida pygmaea</i> | KM221033 | Yantai, Shandong province, China    |
| <i>Patelloida pygmaea</i> | KM221111 | Yantai, Shandong province, China    |
| <i>Patelloida pygmaea</i> | KM221112 | Yantai, Shandong province, China    |
| <i>Patelloida pygmaea</i> | KM221113 | Yantai, Shandong province, China    |
| <i>Patelloida pygmaea</i> | KM221041 | Rongcheng, Shandong province, China |
| <i>Patelloida pygmaea</i> | KM221147 | Qingdao, Shandong province, China   |
| <i>Patelloida pygmaea</i> | KM221148 | Qingdao, Shandong province, China   |

|            |                |                                                  |          |                                      |
|------------|----------------|--------------------------------------------------|----------|--------------------------------------|
|            |                | <i>Patelloida pygmaea</i>                        | KM221149 | Qingdao, Shandong province, China    |
|            |                | <i>Patelloida pygmaea</i>                        | KM221150 | Qingdao, Shandong province, China    |
|            |                | <i>Patelloida ryukyuensis</i>                    | KM221059 | Nanji, Zhejiang province, China      |
|            |                | <i>Patelloida ryukyuensis</i>                    | KM221075 | Fuqing, Fujian province, China       |
|            |                | <i>Patelloida ryukyuensis</i>                    | KM221076 | Fuqing, Fujian province, China       |
|            |                | <i>Patelloida ryukyuensis</i>                    | KM221091 | Yangjiang, Guangdong province, China |
|            |                | <i>Patelloida ryukyuensis</i>                    | KM221092 | Yangjiang, Guangdong province, China |
|            |                | <i>Patelloida ryukyuensis</i>                    | KM221093 | Yangjiang, Guangdong province, China |
|            |                | <i>Patelloida ryukyuensis</i>                    | KM221117 | Zhoushan, Zhejiang province, China   |
|            |                | <i>Patelloida ryukyuensis</i>                    | KM221099 | Zhoushan, Zhejiang province, China   |
|            |                | <i>Patelloida ryukyuensis</i>                    | AB196508 | Hong Kong, China                     |
|            |                | <i>Patelloida ryukyuensis</i>                    | AB196509 | Hong Kong, China                     |
|            |                | <i>Patelloida saccharina</i><br><i>form lanx</i> | KM221083 | Zhangzhou, Fujian province, China    |
|            |                | <i>Patelloida saccharina</i><br><i>form lanx</i> | KM221084 | Zhangzhou, Fujian province, China    |
|            |                | <i>Patelloida saccharina</i><br><i>form lanx</i> | KM221085 | Zhangzhou, Fujian province, China    |
|            |                | <i>Patelloida saccharina</i><br><i>form lanx</i> | KM221086 | Zhangzhou, Fujian province, China    |
|            |                | <i>Patelloida saccharina</i><br><i>form lanx</i> | KM221087 | Zhangzhou, Fujian province, China    |
|            |                | <i>Patelloida saccharina</i><br><i>form lanx</i> | KM221090 | Yangjiang, Guangdong province, China |
|            |                | <i>Patelloida saccharina</i><br><i>form lanx</i> | KM221102 | Wenchang, Hainan province, China     |
|            |                | <i>Patelloida signata</i>                        | AB161632 | Aich, Hazu, Nakanohama, Japan        |
|            |                | <i>Patelloida striata</i>                        | AB161589 | Okinawa, Ogimi, Okinawa, Japan       |
| Nacellidae | <i>Cellana</i> | <i>Cellana grata</i>                             | GQ455948 | Japan                                |
|            |                | <i>Cellana grata</i>                             | GQ455949 | Japan                                |
|            |                | <i>Cellana grata</i>                             | GQ455950 | Japan                                |

|                             |          |                                              |
|-----------------------------|----------|----------------------------------------------|
| <i>Cellana grata</i>        | AB238546 | Mie, Japan                                   |
| <i>Cellana grata</i>        | KM221067 | Xiapu, Fujian province, China                |
| <i>Cellana grata</i>        | KM221072 | Xiapu, Fujian province, China                |
| <i>Cellana grata</i>        | KM221155 | Xiapu, Fujian province, China                |
| <i>Cellana grata</i>        | KM221156 | Xiapu, Fujian province, China                |
| <i>Cellana grata</i>        | KM221095 | Nanji, Zhejiang province, China              |
| <i>Cellana grata</i>        | KM221105 | Nanji, Zhejiang province, China              |
| <i>Cellana grata</i>        | GQ455945 | Hong Kong, China                             |
| <i>Cellana grata</i>        | GQ455946 | Hong Kong, China                             |
| <i>Cellana mazatlandica</i> | GQ455951 | Ogasawara, Japan                             |
| <i>Cellana mazatlandica</i> | GQ455952 | Ogasawara, Japan                             |
| <i>Cellana mazatlandica</i> | GQ455953 | Ogasawara, Japan                             |
| <i>Cellana mazatlandica</i> | GQ455954 | Ogasawara, Japan                             |
| <i>Cellana mazatlandica</i> | GQ455955 | Ogasawara, Japan                             |
| <i>Cellana mazatlandica</i> | AB433635 | Tokyo, Ogasawara Islands, Anejima, Japan     |
| <i>Cellana mazatlandica</i> | AB433636 | Tokyo, Ogasawara Islands, Hirajima, Japan    |
| <i>Cellana mazatlandica</i> | AB433637 | Tokyo, Ogasawara Islands, Hahajima, Japan    |
| <i>Cellana mazatlandica</i> | AB433638 | Tokyo, Ogasawara Islands, Hahajima, Japan    |
| <i>Cellana mazatlandica</i> | AB433639 | Tokyo, Ogasawara Islands, Mukojima, Japan    |
| <i>Cellana mazatlandica</i> | AB433640 | Tokyo, Ogasawara Islands, Chichi-jima, Japan |
| <i>Cellana mazatlandica</i> | AB433641 | Tokyo, Ogasawara Islands, Mukojima, Japan    |
| <i>Cellana mazatlandica</i> | AB433642 | Tokyo, Ogasawara Islands, Chichi-jima, Japan |
| <i>Cellana nigrolineata</i> | AB548176 | Chiba, Japan                                 |
| <i>Cellana nigrolineata</i> | AB548177 | Chiba, Japan                                 |
| <i>Cellana nigrolineata</i> | AB548181 | Ehime, Hiraaura, Japan                       |
| <i>Cellana nigrolineata</i> | AB548182 | Ehime, Hiraaura, Japan                       |
| <i>Cellana nigrolineata</i> | AB548213 | Fukui, Japan                                 |
| <i>Cellana nigrolineata</i> | AB548165 | Fukuoka, Hazu, Japan                         |
| <i>Cellana nigrolineata</i> | AB548166 | Hyogo, Yura, Japan                           |
| <i>Cellana nigrolineata</i> | AB548167 | Hyogo, Yura, Japan                           |
| <i>Cellana nigrolineata</i> | AB548162 | Kagawa, Japan                                |

|                             |          |                             |
|-----------------------------|----------|-----------------------------|
| <i>Cellana nigrolineata</i> | AB548199 | Kagoshima, Japan            |
| <i>Cellana nigrolineata</i> | AB548200 | Kagoshima, Japan            |
| <i>Cellana nigrolineata</i> | AB548185 | Kagoshima, Japan            |
| <i>Cellana nigrolineata</i> | AB548196 | Kagoshima, Japan            |
| <i>Cellana nigrolineata</i> | AB548197 | Kagoshima, Japan            |
| <i>Cellana nigrolineata</i> | AB548183 | Kagoshima, Japan            |
| <i>Cellana nigrolineata</i> | AB548206 | Kagoshima, Japan            |
| <i>Cellana nigrolineata</i> | AB548207 | Kagoshima, Japan            |
| <i>Cellana nigrolineata</i> | AB548208 | Kagoshima, Japan            |
| <i>Cellana nigrolineata</i> | AB548209 | Kagoshima, Japan            |
| <i>Cellana nigrolineata</i> | AB548210 | Kagoshima, Japan            |
| <i>Cellana nigrolineata</i> | AB548184 | Kagoshima, Japan            |
| <i>Cellana nigrolineata</i> | AB548201 | Kagoshima, Japan            |
| <i>Cellana nigrolineata</i> | AB548202 | Kagoshima, Japan            |
| <i>Cellana nigrolineata</i> | AB548203 | Kagoshima, Japan            |
| <i>Cellana nigrolineata</i> | AB548204 | Kagoshima, Japan            |
| <i>Cellana nigrolineata</i> | AB548205 | Kagoshima, Japan            |
| <i>Cellana nigrolineata</i> | AB548192 | Kagoshima, Japan            |
| <i>Cellana nigrolineata</i> | AB548193 | Kagoshima, Japan            |
| <i>Cellana nigrolineata</i> | AB548194 | Kagoshima, Japan            |
| <i>Cellana nigrolineata</i> | AB548195 | Kagoshima, Japan            |
| <i>Cellana nigrolineata</i> | AB548198 | Kagoshima, Japan            |
| <i>Cellana nigrolineata</i> | AB548156 | Kagoshima, Japan            |
| <i>Cellana nigrolineata</i> | AB548190 | Kagoshima, Japan            |
| <i>Cellana nigrolineata</i> | AB548191 | Kagoshima, Japan            |
| <i>Cellana nigrolineata</i> | AB548168 | Kanagawa, Hayama, Japan     |
| <i>Cellana nigrolineata</i> | AB548169 | Kanagawa, Hayama, Japan     |
| <i>Cellana nigrolineata</i> | AB548178 | Kochi, Hanemisaki, Japan    |
| <i>Cellana nigrolineata</i> | AB548170 | Kumamoto, Karakizaki, Japan |
| <i>Cellana nigrolineata</i> | AB548171 | Kumamoto, Karakizaki, Japan |
| <i>Cellana nigrolineata</i> | AB548160 | Kumamoto, Reihoku, Japan    |

|                             |          |                                                      |
|-----------------------------|----------|------------------------------------------------------|
| <i>Cellana nigrolineata</i> | AB548159 | Kumamoto, Reihoku, Japan                             |
| <i>Cellana nigrolineata</i> | AB548174 | Miyagi, Ayukawa, Japan                               |
| <i>Cellana nigrolineata</i> | AB548175 | Miyagi, Ayukawa, Japan                               |
| <i>Cellana nigrolineata</i> | AB548179 | Miyazaki, Kyushu Is, Japan                           |
| <i>Cellana nigrolineata</i> | AB548180 | Miyazaki, Kyushu Is, Japan                           |
| <i>Cellana nigrolineata</i> | AB548211 | Miyazaki, Kyushu Is, Japan                           |
| <i>Cellana nigrolineata</i> | AB548212 | Miyazaki, Kyushu Is, Japan                           |
| <i>Cellana nigrolineata</i> | AB548187 | Oita, Japan                                          |
| <i>Cellana nigrolineata</i> | AB548188 | Oita, Japan                                          |
| <i>Cellana nigrolineata</i> | AB548189 | Oita, Japan                                          |
| <i>Cellana nigrolineata</i> | AB548161 | Shizuoka, Japan                                      |
| <i>Cellana nigrolineata</i> | AB548186 | Shizuoka, Japan                                      |
| <i>Cellana nigrolineata</i> | AB548172 | Shizuoka, Japan                                      |
| <i>Cellana nigrolineata</i> | AB548173 | Shizuoka, Japan                                      |
| <i>Cellana nigrolineata</i> | AB548163 | Shizuoka, Japan                                      |
| <i>Cellana nigrolineata</i> | AB548157 | Wakayama, Japan                                      |
| <i>Cellana nigrolineata</i> | AB548158 | Wakayama, Japan                                      |
| <i>Cellana nigrolineata</i> | AB548164 | Wakayama, Japan                                      |
| <i>Cellana nigrolineata</i> | AB548154 | Yamaguchi, Hikari, Japan                             |
| <i>Cellana nigrolineata</i> | AB548155 | Yamaguchi, Hikari, Japan                             |
| <i>Cellana nigrolineata</i> | GQ455956 | Japan                                                |
| <i>Cellana nigrolineata</i> | AB238548 | Mie, Japan                                           |
| <i>Cellana radiata</i>      | AB263731 | Ogasawara Islands, Chichijima, John Beach, Japan     |
| <i>Cellana radiata</i>      | AB263730 | Ogasawara Islands, Chichijima, John Beach, Japan     |
| <i>Cellana radiata</i>      | AB263729 | Ogasawara Islands, Chichijima, Miyanohama, Japan     |
| <i>Cellana radiata</i>      | AB263728 | Ogasawara Islands, Chichijima, Miyanohama, Japan     |
| <i>Cellana radiata</i>      | AB263727 | Ogasawara Islands, Chichijima, Sakaiura, Japan       |
| <i>Cellana radiata</i>      | AB263726 | Ogasawara Islands, Chichijima, Sakaiura, Japan       |
| <i>Cellana radiata</i>      | AB263725 | Ogasawara Islands, Chichijima, Sakaiura, Japan       |
| <i>Cellana radiata</i>      | AB263724 | Ogasawara Islands, Chichijima, Sakaiura, Japan       |
| <i>Cellana radiata</i>      | AB433644 | Tokyo, Ogasawara Islands, Chichijima Sakaiura, Japan |

|           |               |                   |                             |          |                                                      |
|-----------|---------------|-------------------|-----------------------------|----------|------------------------------------------------------|
|           |               |                   | <i>Cellana radiata</i>      | AB433645 | Tokyo, Ogasawara Islands, Chichijima Sakaiura, Japan |
|           |               |                   | <i>Cellana radiata</i>      | AB433646 | Tokyo, Minami Iwojima, Japan                         |
|           |               |                   | <i>Cellana radiata</i>      |          |                                                      |
|           |               |                   | <i>enneagona</i>            | GQ455964 | Ogasawara, Japan                                     |
|           |               |                   | <i>Cellana radiata</i>      |          |                                                      |
|           |               |                   | <i>enneagona</i>            | GQ455965 | Ogasawara, Japan                                     |
|           |               |                   | <i>Cellana testudinaria</i> | AB238563 | Okinawa, Okinawa, Japan                              |
|           |               |                   | <i>Cellana toreuma</i>      | KM221163 | Rongcheng, Shandong province, China                  |
|           |               |                   | <i>Cellana toreuma</i>      | KM221118 | Qingdao, Shandong province, China                    |
|           |               |                   | <i>Cellana toreuma</i>      | KM221055 | Shengsi, Zhejiang province, China                    |
|           |               |                   | <i>Cellana toreuma</i>      | KM221053 | Zhoushan, Zhejiang province, China                   |
|           |               |                   | <i>Cellana toreuma</i>      | KM221057 | Nanji, Zhejiang province, China                      |
|           |               |                   | <i>Cellana toreuma</i>      | KM221078 | Pingtang, Fujian province, China                     |
|           |               |                   | <i>Cellana toreuma</i>      | KM221079 | Pingtang, Fujian province, China                     |
|           |               |                   | <i>Cellana toreuma</i>      | KM221066 | Sanya, Hainan province, China                        |
|           |               |                   | <i>Cellana toreuma</i>      | KM221162 | Sanya, Hainan province, China                        |
|           |               |                   | <i>Cellana toreuma</i>      | AB445032 | Kumamoto, Reihoku, Japan                             |
|           |               |                   | <i>Cellana toreuma</i>      | AB445031 | Wakayama, Japan                                      |
|           |               |                   | <i>Cellana toreuma</i>      | AB445030 | Kagawa, Japan                                        |
|           |               |                   | <i>Cellana toreuma</i>      | AB445029 | Miyazaki, Kyushu Is, Japan                           |
|           |               |                   | <i>Cellana toreuma</i>      | AB445028 | Aomori, Tappizaki, Japan                             |
|           |               |                   | <i>Cellana toreuma</i>      | AB445027 | Miyagi, Ayukawa, Japan                               |
|           |               |                   | <i>Cellana toreuma</i>      | AB445026 | Kanagawa, Hayama, Japan                              |
|           |               |                   | <i>Cellana toreuma</i>      | AB445025 | Mie, Japan                                           |
|           |               |                   | <i>Cellana toreuma</i>      | AB445024 | Aich, Morozaki, Japan                                |
|           |               |                   | <i>Cellana toreuma</i>      | AB445020 | Fukui, Japan                                         |
|           |               |                   | <i>Cellana toreuma</i>      | AB445019 | Iwate, Yamada, Japan                                 |
|           |               |                   | <i>Cellana toreuma</i>      | GQ455984 | Japan                                                |
|           |               |                   | <i>Cellana toreuma</i>      | GQ455985 | Japan                                                |
|           |               |                   | <i>Cellana toreuma</i>      | AB238564 | AkitaOga, Japan                                      |
| Pulmonata | Siphonariidae | <i>Siphonaria</i> | <i>Siphonaria japonica</i>  | KF716648 | Lianyungang, Jiangsu province, China                 |

|            |                 |               |                            |          |                                     |
|------------|-----------------|---------------|----------------------------|----------|-------------------------------------|
|            |                 |               | <i>Siphonaria japonica</i> | KF716623 | Haikou, Hainan province, China      |
|            |                 |               | <i>Siphonaria japonica</i> | KF716594 | Dongshan, Guangdong province, China |
|            |                 |               | <i>Siphonaria japonica</i> | KF716568 | Xiamen, Fujiang province, China     |
|            |                 |               | <i>Siphonaria japonica</i> | KF716536 | Hong Kong, China                    |
|            |                 |               | <i>Siphonaria japonica</i> | KF716747 | Weihai, Shandong province, China    |
|            |                 |               | <i>Siphonaria japonica</i> | KF716745 | Weihai, Shandong province, China    |
|            |                 |               | <i>Siphonaria japonica</i> | KF716718 | Rizhao, Shandong province, China    |
|            |                 |               | <i>Siphonaria japonica</i> | KF716717 | Rizhao, Shandong province, China    |
|            |                 |               | <i>Siphonaria japonica</i> | KF716701 | Qingdao, Shandong province, China   |
|            |                 |               | <i>Siphonaria japonica</i> | KF716700 | Qingdao, Shandong province, China   |
|            |                 |               | <i>Siphonaria japonica</i> | KF716679 | Ningbo, Zhejiang province, China    |
| Sacoglossa | Plakobranchidae | <i>Elysia</i> | <i>Elysia abei</i>         | AB758955 | Chiba, Japan                        |
|            |                 |               | <i>Elysia abei</i>         | AB758954 | Niigata, Japan                      |
|            |                 |               | <i>Elysia abei</i>         | AB758953 | Niigata, Japan                      |
|            |                 |               | <i>Elysia abei</i>         | KC573711 | Shirahama, Japan                    |
|            |                 |               | <i>Elysia abei</i>         | KC573712 | Shirahama, Japan                    |
|            |                 |               | <i>Elysia abei</i>         | KC573713 | Shirahama, Japan                    |
|            |                 |               | <i>Elysia amakusana</i>    | AB758956 | Niigata, Japan                      |
|            |                 |               | <i>Elysia atroviridis</i>  | AB758942 | Kanagawa, Miura, Japan              |
|            |                 |               | <i>Elysia atroviridis</i>  | AB758941 | Kanagawa, Miura, Japan              |
|            |                 |               | <i>Elysia atroviridis</i>  | AB758940 | Kanagawa, Miura, Japan              |
|            |                 |               | <i>Elysia atroviridis</i>  | AB758939 | Kanagawa, Miura, Japan              |
|            |                 |               | <i>Elysia atroviridis</i>  | AB758938 | Kanagawa, Miura, Japan              |
|            |                 |               | <i>Elysia atroviridis</i>  | AB758937 | Kanagawa, Miura, Japan              |
|            |                 |               | <i>Elysia atroviridis</i>  | AB758936 | Chiba, Japan                        |
|            |                 |               | <i>Elysia atroviridis</i>  | AB758935 | Chiba, Japan                        |
|            |                 |               | <i>Elysia atroviridis</i>  | AB758934 | Okayama, Japan                      |
|            |                 |               | <i>Elysia atroviridis</i>  | AB758933 | Okayama, Japan                      |
|            |                 |               | <i>Elysia atroviridis</i>  | AB758932 | Okayama, Japan                      |
|            |                 |               | <i>Elysia atroviridis</i>  | AB758931 | Okayama, Japan                      |
|            |                 |               | <i>Elysia atroviridis</i>  | AB758930 | Hiroshima, Mukaishima, Japan        |

|                           |          |                              |
|---------------------------|----------|------------------------------|
| <i>Elysia atroviridis</i> | AB758929 | Hiroshima, Mukaishima, Japan |
| <i>Elysia atroviridis</i> | AB758928 | Hiroshima, Mukaishima, Japan |
| <i>Elysia atroviridis</i> | AB758927 | Hiroshima, Mukaishima, Japan |
| <i>Elysia atroviridis</i> | AB758926 | Hiroshima, Mukaishima, Japan |
| <i>Elysia atroviridis</i> | AB758925 | Hiroshima, Mukaishima, Japan |
| <i>Elysia atroviridis</i> | AB758924 | Hiroshima, Mukaishima, Japan |
| <i>Elysia atroviridis</i> | AB758923 | Hiroshima, Mukaishima, Japan |
| <i>Elysia atroviridis</i> | AB758922 | Hiroshima, Mukaishima, Japan |
| <i>Elysia atroviridis</i> | AB758921 | Okayama, Japan               |
| <i>Elysia atroviridis</i> | AB758920 | Okayama, Japan               |
| <i>Elysia atroviridis</i> | AB758919 | Okayama, Japan               |
| <i>Elysia atroviridis</i> | AB758918 | Okayama, Japan               |
| <i>Elysia atroviridis</i> | AB758917 | Okayama, Japan               |
| <i>Elysia atroviridis</i> | AB758916 | Okayama, Japan               |
| <i>Elysia atroviridis</i> | AB758915 | Japan                        |
| <i>Elysia atroviridis</i> | AB758914 | Oita, Japan                  |
| <i>Elysia atroviridis</i> | AB758913 | Kanagawa, Miura, Japan       |
| <i>Elysia atroviridis</i> | AB758912 | Kanagawa, Miura, Japan       |
| <i>Elysia atroviridis</i> | AB758911 | Chiba, Japan                 |
| <i>Elysia atroviridis</i> | AB758910 | Chiba, Japan                 |
| <i>Elysia atroviridis</i> | AB758909 | Okayama, Japan               |
| <i>Elysia atroviridis</i> | AB758908 | Okayama, Japan               |
| <i>Elysia atroviridis</i> | AB758907 | Okayama, Japan               |
| <i>Elysia atroviridis</i> | AB758906 | Okayama, Japan               |
| <i>Elysia atroviridis</i> | AB758905 | Okayama, Japan               |
| <i>Elysia atroviridis</i> | AB758949 | Oita, Japan                  |
| <i>Elysia atroviridis</i> | AB758948 | Oita, Japan                  |
| <i>Elysia atroviridis</i> | AB758947 | Oita, Japan                  |
| <i>Elysia atroviridis</i> | AB758946 | Oita, Japan                  |
| <i>Elysia atroviridis</i> | AB758945 | Yamaguchi, Tsunoshima, Japan |
| <i>Elysia atroviridis</i> | AB758944 | Yamaguchi, Tsunoshima, Japan |



|              |                       |                                 |                             |                                   |                                     |
|--------------|-----------------------|---------------------------------|-----------------------------|-----------------------------------|-------------------------------------|
|              |                       | <i>Elysia atroviridis</i>       | AB758943                    | Kanagawa, Miura, Japan            |                                     |
|              |                       | <i>Elysia atroviridis</i>       | KC573760                    | Choshi, Japan                     |                                     |
|              |                       | <i>Elysia ornata</i>            | AB758967                    | Okinawa, Sobe, Okinawa, Japan     |                                     |
|              |                       | <i>Elysia ornata</i>            | AB758966                    | Niigata, Japan                    |                                     |
|              |                       | <i>Elysia ornata</i>            | AB758965                    | Niigata, Japan                    |                                     |
|              |                       | <i>Elysia ornata</i>            | AB758964                    | Chiba, Japan                      |                                     |
|              |                       | <i>Elysia ornata</i>            | AB758963                    | Yamaguchi, Tsunoshima, Japan      |                                     |
|              |                       | <i>Elysia ornata</i>            | AB758962                    | Mie, Japan                        |                                     |
|              |                       | <i>Elysia pusilla</i>           | AB758959                    | Okinawa, Hamahiga, Okinawa, Japan |                                     |
|              |                       | <i>Elysia pusilla</i>           | AB758958                    | Okinawa, Hamahiga, Okinawa, Japan |                                     |
|              |                       | <i>Elysia pusilla</i>           | AB758957                    | Okinawa, Chinen, Okinawa, Japan   |                                     |
|              |                       | <i>Elysia rufescens</i>         | AB758961                    | Okinawa, Sobe, Okinawa, Japan     |                                     |
|              |                       | <i>Elysia rufescens</i>         | AB758960                    | Chiba, Japan                      |                                     |
|              |                       | <i>Elysia setoensis</i>         | KC573761                    | Kanagawa, Japan                   |                                     |
|              |                       | <i>Elysia trisinuata</i>        | AB758951                    | Niigata, Japan                    |                                     |
|              | <i>Plakobranchnus</i> | <i>Plakobranchnus ocellatus</i> | AB758971                    | Okinawa, Toguchi, Okinawa, Japan  |                                     |
|              |                       | <i>Plakobranchnus ocellatus</i> | AB758970                    | Okinawa, Toguchi, Okinawa, Japan  |                                     |
|              |                       | <i>Plakobranchnus ocellatus</i> | AB758969                    | Okinawa, Kouri, Okinawa, Japan    |                                     |
|              |                       | <i>Plakobranchnus ocellatus</i> | AB758968                    | Okinawa, Sobe, Okinawa, Japan     |                                     |
|              |                       | <i>Plakobranchnus ocellatus</i> | AB501307                    | Okinawa, Okinawa, Japan           |                                     |
|              | Limapontiidae         | <i>Stiliger</i>                 | <i>Stiliger ornatus</i>     | AB501311                          | Okinawa, Okinawa, Japan             |
|              |                       |                                 | <i>Stiliger smaragdinus</i> | AB501310                          | Kanagawa, Japan                     |
|              | Elysiidae             | <i>Thuridilla</i>               | <i>Thuridilla gracilis</i>  | AB758972                          | Okinawa, Hamahiga, Okinawa, Japan   |
|              |                       |                                 | <i>Thuridilla splendens</i> | AB758973                          | Okinawa, Kouri, Okinawa, Japan      |
| Sorbeoconcha | Batillariidae         | <i>Batillaria</i>               | <i>Batillaria cumingii</i>  | JF693342                          | Fuqing, Fujian province, China      |
|              |                       |                                 | <i>Batillaria cumingii</i>  | JF693341                          | Rongcheng, Shandong province, China |
|              |                       |                                 | <i>Batillaria cumingii</i>  | JF693343                          | Rongcheng, Shandong province, China |
|              |                       |                                 | <i>Batillaria cumingii</i>  | AB535194                          | Miyagi, Nagazuraura Lagoon, Japan   |
|              |                       |                                 | <i>Batillaria cumingii</i>  | AB535195                          | Miyagi, Nagazuraura Lagoon, Japan   |
|              |                       |                                 | <i>Batillaria zonalis</i>   | JF693339                          | Qingdao, Shandong province, China   |
|              |                       |                                 | <i>Batillaria zonalis</i>   | JF693340                          | Qingdao, Shandong province, China   |

|                             |                    |                                 |                                |                                        |
|-----------------------------|--------------------|---------------------------------|--------------------------------|----------------------------------------|
| Cerithiidae                 | <i>Clypeomorus</i> | <i>Clypeomorus humilis</i>      | JF693365                       | Qingdao, Shandong province, China      |
|                             |                    | <i>Clypeomorus humilis</i>      | JF693366                       | Qingdao, Shandong province, China      |
|                             | <i>Cerithium</i>   | <i>Cerithium traillii</i>       | JF693363                       | Beibhai, Guangxi province, China       |
|                             |                    | <i>Cerithium traillii</i>       | JF693364                       | Beibhai, Guangxi province, China       |
|                             | <i>Rhinoclavis</i> | <i>Rhinoclavis sinensis</i>     | JF693360                       | Beibhai, Guangxi province, China       |
|                             |                    | <i>Rhinoclavis sinensis</i>     | JF693361                       | Lingao, Hainan province, China         |
| <i>Rhinoclavis sinensis</i> |                    | JF693362                        | Lingao, Hainan province, China |                                        |
| Planaxidae                  | <i>Planaxis</i>    | <i>Planaxis sulcatus</i>        | JF693413                       | Weizhou, Guangxi province, China       |
|                             |                    | <i>Planaxis sulcatus</i>        | JF693411                       | Fangchenggang, Guangxi province, China |
|                             |                    | <i>Planaxis sulcatus</i>        | JF693414                       | Wenchang, Hainan province, China       |
|                             |                    | <i>Planaxis sulcatus</i>        | JF693412                       | Sanya, Hainan province, China          |
|                             |                    | <i>Planaxis sulcatus</i>        | JF693415                       | Sanya, Hainan province, China          |
| Potamididae                 | <i>Cerithidea</i>  | <i>Cerithidea alata</i>         | HE680304                       | Yokaku Bay, Kumamoto Pref., Japan      |
|                             |                    | <i>Cerithidea alata</i>         | HE680305                       | Yokaku Bay, Kumamoto Pref., Japan      |
|                             |                    | <i>Cerithidea alata</i>         | HE680306                       | Yokaku Bay, Kumamoto Pref., Japan      |
|                             |                    | <i>Cerithidea alata</i>         | HE680307                       | Yokaku Bay, Kumamoto Pref., Japan      |
|                             |                    | <i>Cerithidea alata</i>         | HE680308                       | Yokaku Bay, Kumamoto Pref., Japan      |
|                             |                    | <i>Cerithidea alata</i>         | HE680309                       | Yokaku Bay, Kumamoto Pref., Japan      |
|                             |                    | <i>Cerithidea alata</i>         | HE680310                       | Yokaku Bay, Kumamoto Pref., Japan      |
|                             |                    | <i>Cerithidea alata</i>         | HE680311                       | Yokaku Bay, Kumamoto Pref., Japan      |
|                             |                    | <i>Cerithidea cingulata</i>     | HE680432                       | Shioya Bay, Okinawa, Okinawa, Japan    |
|                             |                    | <i>Cerithidea cingulata</i>     | HE680433                       | Shioya Bay, Okinawa, Okinawa, Japan    |
|                             |                    | <i>Cerithidea cingulata</i>     | HE680434                       | Tsuyazaki, Fukuoka Pref., Japan        |
|                             |                    | <i>Cerithidea cingulata</i>     | HE680435                       | Tsuyazaki, Fukuoka Pref., Japan        |
|                             |                    | <i>Cerithidea cingulata</i>     | HE680436                       | Tsuyazaki, Fukuoka Pref., Japan        |
|                             |                    | <i>Cerithidea cingulata</i>     | HE680437                       | Tsuyazaki, Fukuoka Pref., Japan        |
|                             |                    | <i>Cerithidea cingulata</i>     | HE680438                       | Tsuyazaki, Fukuoka Pref., Japan        |
|                             |                    | <i>Cerithidea cingulata</i>     | HE680439                       | Tsuyazaki, Fukuoka Pref., Japan        |
|                             |                    | <i>Cerithidea cingulata</i>     | HE680440                       | Tsuyazaki, Fukuoka Pref., Japan        |
| <i>Cerithidea cingulata</i> | HE680441           | Tsuyazaki, Fukuoka Pref., Japan |                                |                                        |
| <i>Cerithidea cingulata</i> | HE680442           | Tsuyazaki, Fukuoka Pref., Japan |                                |                                        |

|                                 |          |                                           |
|---------------------------------|----------|-------------------------------------------|
| <i>Cerithidea cingulata</i>     | HE680443 | Tsuyazaki, Fukuoka Pref., Japan           |
| <i>Cerithidea cingulata</i>     | HE680444 | Tsuyazaki, Fukuoka Pref., Japan           |
| <i>Cerithidea cingulata</i>     | HE680445 | Tsuyazaki, Fukuoka Pref., Japan           |
| <i>Cerithidea cingulata</i>     | HE680446 | Tsuyazaki, Fukuoka Pref., Japan           |
| <i>Cerithidea cingulata</i>     | HE680447 | Tsuyazaki, Fukuoka Pref., Japan           |
| <i>Cerithidea cingulata</i>     | HE680448 | Tsuyazaki, Fukuoka Pref., Japan           |
| <i>Cerithidea cingulata</i>     | HE680449 | Tsuyazaki, Fukuoka Pref., Japan           |
| <i>Cerithidea cingulata</i>     | HE680450 | Tsuyazaki, Fukuoka Pref., Japan           |
| <i>Cerithidea cingulata</i>     | HE680451 | Tsuyazaki, Fukuoka Pref., Japan           |
| <i>Cerithidea cingulata</i>     | HE680452 | Tsuyazaki, Fukuoka Pref., Japan           |
| <i>Cerithidea cingulata</i>     | HE680454 | Yokakuwan, Kawaura, Kumamoto Pref., Japan |
| <i>Cerithidea cingulata</i>     | HE680455 | Yokakuwan, Kawaura, Kumamoto Pref., Japan |
| <i>Cerithidea djadjariensis</i> | HE680559 | Hikawa, Kumamoto Pref., Kyushu, Japan     |
| <i>Cerithidea djadjariensis</i> | HE680560 | Hikawa, Kumamoto Pref., Kyushu, Japan     |
| <i>Cerithidea djadjariensis</i> | HE680561 | Hikawa, Kumamoto Pref., Kyushu, Japan     |
| <i>Cerithidea djadjariensis</i> | HE680562 | Hikawa, Kumamoto Pref., Kyushu, Japan     |
| <i>Cerithidea djadjariensis</i> | HE680563 | Hikawa, Kumamoto Pref., Kyushu, Japan     |
| <i>Cerithidea djadjariensis</i> | HE680564 | Hikawa, Kumamoto Pref., Kyushu, Japan     |
| <i>Cerithidea djadjariensis</i> | HE680565 | Hikawa, Kumamoto Pref., Kyushu, Japan     |
| <i>Cerithidea djadjariensis</i> | HE680566 | Hikawa, Kumamoto Pref., Kyushu, Japan     |
| <i>Cerithidea djadjariensis</i> | HE680567 | Hikawa, Kumamoto Pref., Kyushu, Japan     |
| <i>Cerithidea djadjariensis</i> | HE680568 | Hikawa, Kumamoto Pref., Kyushu, Japan     |
| <i>Cerithidea djadjariensis</i> | HE680569 | Hikawa, Kumamoto Pref., Kyushu, Japan     |
| <i>Cerithidea djadjariensis</i> | HE680557 | Iriomote I., Ryukyu Is, Japan             |
| <i>Cerithidea djadjariensis</i> | HE680558 | Iriomote I., Ryukyu Is, Japan             |
| <i>Cerithidea djadjariensis</i> | HE680556 | Isahaya Bay, Nagasaki Pref., Japan        |
| <i>Cerithidea djadjariensis</i> | HE680582 | Isahaya Bay, Nagasaki Pref., Japan        |
| <i>Cerithidea djadjariensis</i> | HE680583 | Isahaya Bay, Nagasaki Pref., Japan        |
| <i>Cerithidea djadjariensis</i> | HE680570 | Kiire, Kagoshima Pref., Japan             |
| <i>Cerithidea djadjariensis</i> | HE680571 | Kiire, Kagoshima Pref., Japan             |
| <i>Cerithidea djadjariensis</i> | HE680584 | Kiire, Kagoshima Pref., Japan             |

|                                 |          |                                                                      |
|---------------------------------|----------|----------------------------------------------------------------------|
| <i>Cerithidea djadjariensis</i> | HE680572 | Matsuzaka, Mie Pref., Japan                                          |
| <i>Cerithidea djadjariensis</i> | HE680573 | Matsuzaka, Mie Pref., Japan                                          |
| <i>Cerithidea djadjariensis</i> | HE680574 | Matsuzaka, Mie Pref., Japan                                          |
| <i>Cerithidea djadjariensis</i> | HE680575 | Matsuzaka, Mie Pref., Japan                                          |
| <i>Cerithidea djadjariensis</i> | HE680576 | Matsuzaka, Mie Pref., Japan                                          |
| <i>Cerithidea djadjariensis</i> | HE680577 | Matsuzaka, Mie Pref., Japan                                          |
| <i>Cerithidea djadjariensis</i> | HE680578 | Matsuzaka, Mie Pref., Japan                                          |
| <i>Cerithidea djadjariensis</i> | HE680579 | Matsuzaka, Mie Pref., Japan                                          |
| <i>Cerithidea djadjariensis</i> | HE680580 | Matsuzaka, Mie Pref., Japan                                          |
| <i>Cerithidea djadjariensis</i> | HE680581 | Matsuzaka, Mie Pref., Japan                                          |
| <i>Cerithidea djadjariensis</i> | HE680553 | Senaga-jima, Okinawa Pref., Okinawa, Japan                           |
| <i>Cerithidea djadjariensis</i> | HE680554 | Senaga-jima, Okinawa Pref., Okinawa, Japan                           |
| <i>Cerithidea largillierti</i>  | AM932789 | Lower Reaches of Ushitsu River, Nagata, Ashikari Town, Kyushu, Japan |
| <i>Cerithidea ornate</i>        | AM932767 | Sandybyakken, Japan                                                  |
| <i>Cerithidea ornate</i>        | AM932766 | Mouth of Hikawa River, Hikawa Town, Kyushu, Japan                    |
| <i>Cerithidea ornate</i>        | HE680222 | Hikawa, Kumamoto Pref., Kyushu, Japan                                |
| <i>Cerithidea ornate</i>        | HE680223 | Hikawa, Kumamoto Pref., Kyushu, Japan                                |
| <i>Cerithidea ornate</i>        | HE680224 | Hikawa, Kumamoto Pref., Kyushu, Japan                                |
| <i>Cerithidea rhizophorarum</i> | JF694694 | South China Sea                                                      |
| <i>Cerithidea rhizophorarum</i> | JF694695 | Taiwan Strait, Hsinchu, Taiwan, China                                |
| <i>Cerithidea rhizophorarum</i> | AM932774 | Makiya, Okinawa, Japan                                               |
| <i>Cerithidea rhizophorarum</i> | HE680254 | Japan, Funaura                                                       |
| <i>Cerithidea rhizophorarum</i> | HE680255 | Funaura, Japan                                                       |
| <i>Cerithidea rhizophorarum</i> | HE680257 | Funaura, Japan                                                       |
| <i>Cerithidea rhizophorarum</i> | HE680258 | Haneji, Okinawa, Ryukyu Is, Okinawa, Japan                           |
| <i>Cerithidea rhizophorarum</i> | HE680259 | Hikawa, Kumamoto Pref., Kyushu, Japan                                |
| <i>Cerithidea rhizophorarum</i> | HE680260 | Hikawa, Kumamoto Pref., Kyushu, Japan                                |
| <i>Cerithidea rhizophorarum</i> | HE680261 | Fukuoka Pref., Imazu Bay, Japan                                      |
| <i>Cerithidea rhizophorarum</i> | HE680262 | Fukuoka Pref., Imazu Bay, Japan                                      |
| <i>Cerithidea rhizophorarum</i> | HE680263 | Fukuoka Pref., Imazu Bay, Japan                                      |

|                   |                                 |          |                                                               |
|-------------------|---------------------------------|----------|---------------------------------------------------------------|
|                   | <i>Cerithidea rhizophorarum</i> | HE680264 | Fukuoka Pref., Imazu Bay, Japan                               |
|                   | <i>Cerithidea rhizophorarum</i> | HE680265 | Fukuoka Pref., Imazu Bay, Japan                               |
|                   | <i>Cerithidea rhizophorarum</i> | HE680276 | Isahaya Bay, Nagasaki Pref., Japan                            |
|                   | <i>Cerithidea rhizophorarum</i> | HE680277 | Isahaya Bay, Nagasaki Pref., Japan                            |
|                   | <i>Cerithidea rhizophorarum</i> | HE680278 | Isahaya Bay, Nagasaki Pref., Japan                            |
|                   | <i>Cerithidea rhizophorarum</i> | HE680279 | Isahaya Bay, Nagasaki Pref., Japan                            |
|                   | <i>Cerithidea rhizophorarum</i> | HE680280 | Isahaya Bay, Nagasaki Pref., Japan                            |
|                   | <i>Cerithidea rhizophorarum</i> | HE680281 | Isahaya Bay, Nagasaki Pref., Japan                            |
|                   | <i>Cerithidea rhizophorarum</i> | HE680282 | Isahaya Bay, Nagasaki Pref., Japan                            |
|                   | <i>Cerithidea rhizophorarum</i> | HE680271 | Hiroshima Pref., Kasaoka Bay, Japan                           |
|                   | <i>Cerithidea rhizophorarum</i> | HE680272 | Hiroshima Pref., Kasaoka Bay, Japan                           |
|                   | <i>Cerithidea rhizophorarum</i> | HE680273 | Hiroshima Pref., Kasaoka Bay, Japan                           |
|                   | <i>Cerithidea rhizophorarum</i> | HE680274 | Hiroshima Pref., Kasaoka Bay, Japan                           |
|                   | <i>Cerithidea rhizophorarum</i> | HE680275 | Hiroshima Pref., Kasaoka Bay, Japan                           |
|                   | <i>Cerithidea rhizophorarum</i> | HE680270 | Kiire, Kagoshima, Japan                                       |
|                   | <i>Cerithidea rhizophorarum</i> | HE680266 | Kiire, Kagoshima Pref., Japan                                 |
|                   | <i>Cerithidea rhizophorarum</i> | HE680267 | Kiire, Kagoshima Pref., Japan                                 |
|                   | <i>Cerithidea rhizophorarum</i> | HE680268 | Kiire, Kagoshima Pref., Japan                                 |
|                   | <i>Cerithidea rhizophorarum</i> | HE680269 | Kiire, Kagoshima Pref., Japan                                 |
|                   | <i>Cerithidea rhizophorarum</i> | HE680283 | Shiokawa, Aichi Pref., Japan                                  |
|                   | <i>Cerithidea rhizophorarum</i> | HE680284 | Shiokawa, Aichi Pref., Japan                                  |
|                   | <i>Cerithidea rhizophorarum</i> | HE680285 | Shiokawa, Aichi Pref., Japan                                  |
| <i>Terebralia</i> | <i>Terebralia palustris</i>     | HE680652 | Ryukyu Is, HunauraIriomote I., Japan                          |
|                   | <i>Terebralia sulcata</i>       | HE680663 | Hong Kong, China                                              |
|                   | <i>Terebralia sulcata</i>       | HE680670 | Haneji, Okinawa, Okinawa, Japan                               |
|                   | <i>Terebralia sulcata</i>       | HE680630 | Okinawa Pref., Kunigami-gun, Ginoza, Kanna R., Okinawa, Japan |
|                   | <i>Terebralia sulcata</i>       | HE680667 | Okinawa Pref., Kunigami-gun, Ginoza, Kanna R., Okinawa, Japan |
|                   | <i>Terebralia sulcata</i>       | HE680668 | Okinawa Pref., Kunigami-gun, Ginoza, Kanna R., Okinawa, Japan |

|                    |                |                     |                               |          |                                                               |
|--------------------|----------------|---------------------|-------------------------------|----------|---------------------------------------------------------------|
|                    |                |                     | <i>Terebralia sulcata</i>     | HE680669 | Okinawa Pref., Kunigami-gun, Ginoza, Kanna R., Okinawa, Japan |
|                    |                |                     | <i>Terebralia sulcata</i>     | HE680671 | Okinawa, Nago, Ooura R., Okinawa, Japan                       |
|                    | Turritellidae  | <i>Turritella</i>   | <i>Turritella terebra</i>     | JF693443 | Beibhai, Guangxi province, China                              |
|                    |                |                     | <i>Turritella terebra</i>     | JF693444 | Wenzhou, Zhejiang province, China                             |
|                    |                |                     | <i>Turritella terebra</i>     | JF693445 | Ningde, Fujian province, China                                |
|                    |                |                     | <i>Turritella terebra</i>     | JF693446 | Beibhai, Guangxi province, China                              |
|                    |                |                     | <i>Turritella terebra</i>     | JF693447 | Lianyungang, Jiangsu province, China                          |
| Systellommatophora | Onchidiidae    | <i>Paraoncidium</i> | <i>Paraoncidium reevesii</i>  | JN543145 | Zhanjiang, Guangdong province, China                          |
|                    |                |                     | <i>Paraoncidium reevesii</i>  | JN543146 | Cangnan, Zhejiang province, China                             |
|                    |                |                     | <i>Paraoncidium reevesii</i>  | JN543147 | Hong Kong, China                                              |
|                    |                |                     | <i>Paraoncidium reevesii</i>  | JN543148 | Qinzhou, Guangxi province, China                              |
|                    |                |                     | <i>Paraoncidium reevesii</i>  | JN543149 | Ningde, Fujian province, China                                |
|                    |                |                     | <i>Paraoncidium reevesii</i>  | JN543150 | Haikou, Hainan province, China                                |
|                    |                |                     | <i>Paraoncidium reevesii</i>  | JN543151 | Xiamen, Fujian province, China                                |
|                    |                | <i>Peronia</i>      | <i>Peronia verruculata</i>    | JN543152 | Zhanjiang, Guangdong province, China                          |
|                    |                |                     | <i>Peronia verruculata</i>    | JN543153 | Ningde, Fujian province, China                                |
|                    |                |                     | <i>Peronia verruculata</i>    | JN543154 | Haikou, Hainan province, China                                |
|                    |                | <i>Platevindex</i>  | <i>Platevindex mortoni</i>    | JN543136 | Zhanjiang, Guangdong province, China                          |
|                    |                |                     | <i>Platevindex mortoni</i>    | JN543137 | Ningde, Fujian province, China                                |
|                    |                |                     | <i>Platevindex mortoni</i>    | JN543138 | Haikou, Hainan province, China                                |
|                    |                |                     | <i>Platevindex mortoni</i>    | JN543139 | Qinzhou, Guangxi province, China                              |
|                    |                |                     | <i>Platevindex mortoni</i>    | JN543140 | Xiamen, Fujian province, China                                |
|                    |                |                     | <i>Platevindex mortoni</i>    | JN543141 | Hong Kong, China                                              |
| Thecosomata        | Cavoliniidae   | <i>Cuvierina</i>    | <i>Cuvierina pacifica</i>     | KP292770 | Japan                                                         |
|                    |                |                     | <i>Cuvierina pacifica</i>     | KP292769 | Japan                                                         |
|                    |                |                     | <i>Cuvierina pacifica</i>     | KP292768 | Japan                                                         |
|                    |                |                     | <i>Cuvierina pacifica</i>     | KP292767 | Japan                                                         |
|                    |                |                     | <i>Cuvierina pacifica</i>     | KP292766 | Japan                                                         |
| Vetigastropoda     | Calliotropidae | <i>Ginebis</i>      | <i>Ginebis argenteonitens</i> | AB365231 | Kanagawa, Misaki, Japan                                       |
|                    |                |                     | <i>Ginebis argenteonitens</i> | EU530112 | Japan                                                         |

|                |                  |                     |                                    |          |                                          |
|----------------|------------------|---------------------|------------------------------------|----------|------------------------------------------|
|                |                  |                     | <i>Ginebis argenteonitens</i>      | EU530111 | Japan                                    |
|                |                  | <i>Granata</i>      | <i>Granata lyrata</i>              | AB365232 | Kagoshima, Japan                         |
|                |                  |                     | <i>Granata lyrata</i>              | EU530114 | Japan                                    |
|                |                  | <i>Herpetopoma</i>  | <i>Herpetopoma pauperculus</i>     | AB365233 | Ibaraki, Japan                           |
|                | Colloniidae      | <i>Homalopoma</i>   | <i>Homalopoma granuliferum</i>     | AM049347 | Shionomisaki, Wakayama Prefecture, Japan |
|                |                  |                     | <i>Homalopoma granuliferum</i>     | AB365217 | Kanagawa, Misaki, Japan                  |
|                |                  |                     | <i>Homalopoma nocturnum</i>        | AM049348 | Mitsuishi, Kanagawa Prefecture, Japan    |
|                |                  |                     | <i>Homalopoma sangarensense</i>    | AM049350 | Ohtsuchi Bay, Iwate Prefecture, Japan    |
|                | Fissurellidae    | <i>Emarginula</i>   | <i>Emarginula foveolata</i>        | AM049333 | Inland Sea, Hiroshima Prefecture, Japan  |
|                |                  |                     | <i>Emarginula foveolata</i>        | AB238593 | Hiroshima, Japan                         |
|                |                  |                     | <i>Emarginula variegata</i>        | AB365213 | Okinawa, Okinawa, Japan                  |
|                |                  |                     | <i>Emarginula variegata</i>        | AB238594 | Okinawa, Okinawa, Japan                  |
|                |                  | <i>Macroschisma</i> | <i>Macroschisma dilatata</i>       | AM049334 | Sugashima Island, Mie Prefecture, Japan  |
|                |                  |                     | <i>Macroschisma dilatata</i>       | AB365212 | Miyazaki, Japan                          |
| Polyplacophora | Acanthochitonina | Acanthochitonidae   | <i>Acanthochitona achates</i>      | HM180415 | Korea                                    |
|                |                  |                     | <i>Acanthochitona achates</i>      | HM180416 | Korea                                    |
|                |                  |                     | <i>Acanthochitona defilippi</i>    | HM180417 | Korea                                    |
|                |                  |                     | <i>Acanthochitona defilippi</i>    | HM180419 | Korea                                    |
|                |                  |                     | <i>Acanthochitona defilippi</i>    | HM180421 | Korea                                    |
|                |                  |                     | <i>Acanthochitona defilippi</i>    | HM180422 | Korea                                    |
|                |                  |                     | <i>Acanthochitona defilippi</i>    | HM180418 | Korea                                    |
|                |                  |                     | <i>Acanthochitona rubrolineata</i> | HM180427 | Korea                                    |
|                |                  |                     | <i>Acanthochitona rubrolineata</i> | HM180428 | Korea                                    |
|                |                  |                     | <i>Acanthochitona rubrolineata</i> | HM180429 | Korea                                    |
|                |                  |                     | <i>Acanthochitona rubrolineata</i> | HM180430 | Korea                                    |

**Supplementary Table 2.** Species without a barcode gap. For each species, the mean and maximum intra-specific values are compared to the nearest neighbour distance.

| Family            | Species                          | Mean<br>Intra-Sp | Max<br>Intra-Sp | Nearest Species                   | Distance<br>to NN |
|-------------------|----------------------------------|------------------|-----------------|-----------------------------------|-------------------|
| Veneridae         | <i>Ruditapes variegata</i>       | 6.11             | 29.9            | <i>Ruditapes philippinarum</i>    | 0                 |
| Cerithiidae       | <i>Clypeomorus humilis</i>       | 25.03            | 25.03           | <i>Planaxis sulcatus</i>          | 0.33              |
| Acanthochitonidae | <i>Acanthochitona defilippi</i>  | 12.29            | 24.84           | <i>Acanthochitona achates</i>     | 0.29              |
| Columbellidae     | <i>Euplica scripta</i>           | 12.13            | 24.14           | <i>Conus aristophanes</i>         | 0.63              |
| Mytilidae         | <i>Mytilus galloprovincialis</i> | 11.91            | 22.03           | <i>Mytilus coruscus</i>           | 0                 |
| Veneridae         | <i>Meretrix meretrix</i>         | 10.3             | 19.35           | <i>Meretrix petechialis</i>       | 0                 |
| Plakobranhidae    | <i>Elysia atroviridis</i>        | 1.8              | 17.61           | <i>Elysia ornata</i>              | 0                 |
| Veneridae         | <i>Paphia undulata</i>           | 3.24             | 17.44           | <i>Paphia textile</i>             | 0                 |
| Muricidae         | <i>Rapana bezoar</i>             | 4.87             | 16.56           | <i>Rapana venosa</i>              | 0.46              |
| Veneridae         | <i>Periglypta puerpera</i>       | 2.77             | 14.64           | <i>Periglypta compressa</i>       | 0                 |
| Lottiidae         | <i>Nipponacmea nigrans</i>       | 4.77             | 14.23           | <i>Nipponacmea concinna</i>       | 0.3               |
| Conidae           | <i>Conus sanguinolentus</i>      | 1.92             | 12.38           | <i>Conus lividus</i>              | 0.31              |
| Lottiidae         | <i>Patelloida pygmaea</i>        | 8.25             | 20.31           | <i>Patelloida conulus</i>         | 9.26              |
| Plakobranhidae    | <i>Elysia ornata</i>             | 7.44             | 10.96           | <i>Elysia atroviridis</i>         | 0                 |
| Muricidae         | <i>Thais luteostoma</i>          | 1.94             | 10.99           | <i>Reishia bronni</i>             | 0.15              |
| Nacellidae        | <i>Cellana nigrolineata</i>      | 1.15             | 11.05           | <i>Cellana grata</i>              | 0.51              |
| Columbellidae     | <i>Mitrella bicincta</i>         | 5.52             | 10.26           | <i>Mitrella cf. tuberosa</i>      | 0.15              |
| Veneridae         | <i>Meretrix lusoria</i>          | 5.56             | 9.32            | <i>Meretrix petechialis</i>       | 0                 |
| Idiosepiidae      | <i>Idiosepius paradoxus</i>      | 1.91             | 9.35            | <i>Idiosepius biserialis</i>      | 0.94              |
| Littorinidae      | <i>Littoraria intermedia</i>     | 11.14            | 16.79           | <i>Littoraria scabra</i>          | 8.7               |
| Nacellidae        | <i>Cellana grata</i>             | 3.93             | 8.43            | <i>Cellana nigrolineata</i>       | 0.51              |
| Veneridae         | <i>Meretrix petechialis</i>      | 3.7              | 7.7             | <i>Meretrix lusoria</i>           | 0                 |
| Fascioliariidae   | <i>Fusinus longicaudus</i>       | 4.73             | 6.69            | <i>Fusinus forceps</i>            | 0.15              |
| Veneridae         | <i>Macridiscus aequilatera</i>   | 3.26             | 6.26            | <i>Macridiscus semicancellata</i> | 0                 |



|                   |                                    |       |       |                                  |       |
|-------------------|------------------------------------|-------|-------|----------------------------------|-------|
| Corbiculidae      | <i>Corbicula leana</i>             | 1.82  | 3.62  | <i>Corbicula fluminea</i>        | 0     |
| Littorinidae      | <i>Littoraria scabra</i>           | 11.31 | 11.31 | <i>Littoraria intermedia</i>     | 8.7   |
| Veneridae         | <i>Ruditapes philippinarum</i>     | 1.12  | 2.6   | <i>Ruditapes variegata</i>       | 0     |
| Acanthochitonidae | <i>Acanthochitona rubrolineata</i> | 1.91  | 3     | <i>Acanthochitona defilippi</i>  | 0.44  |
| Sepiidae          | <i>Sepiella maindroni</i>          | 3.11  | 3.11  | <i>Sepiella japonica</i>         | 0.77  |
| Mactridae         | <i>Mactra veneriformis</i>         | 0.74  | 2.34  | <i>Protothaca jodoensis</i>      | 0     |
| Mactridae         | <i>Coelomactra antiquata</i>       | 10.33 | 14.95 | <i>Mactra cumingii</i>           | 12.93 |
| Solenidae         | <i>Solen grandis</i>               | 11.1  | 16.66 | <i>Solen strictus</i>            | 14.71 |
| Veneridae         | <i>Macridiscus semicancellata</i>  | 0.85  | 1.9   | <i>Macridiscus aequilatera</i>   | 0     |
| Muricidae         | <i>Reishia bronni</i>              | 1.53  | 2.01  | <i>Thais luteostoma</i>          | 0.15  |
| Trochidae         | <i>Chlorostoma turbinatum</i>      | 0.38  | 1.61  | <i>Omphalius rusticus</i>        | 0     |
| Veneridae         | <i>Gafrarium dispar</i>            | 3.78  | 14.74 | <i>Gafrarium divaricatum</i>     | 13.19 |
| Mytilidae         | <i>Mytilus coruscus</i>            | 0.65  | 1.54  | <i>Mytilus galloprovincialis</i> | 0     |
| Planaxidae        | <i>Planaxis sulcatus</i>           | 1.12  | 1.81  | <i>Clypeomorus humilis</i>       | 0.33  |
| Muricidae         | <i>Thais clavigera</i>             | 0.72  | 2.17  | <i>Thais luteostoma</i>          | 0.91  |
| Buccinidae        | <i>Neptunea cumingi</i>            | 1.01  | 1.54  | <i>Ocinebrellus inornatus</i>    | 0.3   |
| Trochidae         | <i>Omphalius rusticus rusticus</i> | 1.22  | 1.22  | <i>Chlorostoma turbinatum</i>    | 0     |
| Fascioliariidae   | <i>Fusinus forceps</i>             | 0.56  | 1.31  | <i>Fusinus longicaudus</i>       | 0.15  |
| Mytilidae         | <i>Modiolus comptus</i>            | 0.92  | 1.54  | <i>Modiolus nipponicus</i>       | 0.43  |
| Lottiidae         | <i>Nipponacmea radula</i>          | 0.4   | 1.08  | <i>Nipponacmea schrenckii</i>    | 0     |
| Nacellidae        | <i>Cellana toreuma</i>             | 0.18  | 1.07  | <i>Notoacmea schrenckii</i>      | 0     |
| Acmaeidae         | <i>Notoacmea schrenckii</i>        | 0.43  | 1.02  | <i>Cellana toreuma</i>           | 0     |
| Corbiculidae      | <i>Corbicula fluminea</i>          | 0.47  | 0.95  | <i>Corbicula leana</i>           | 0     |
| Pteriidae         | <i>Pinctada fucata</i>             | 0.22  | 0.8   | <i>Pinctada martensi</i>         | 0     |
| Veneridae         | <i>Dosinia biscocta</i>            | 0.76  | 0.76  | <i>Dosinia fibula</i>            | 0     |
| Veneridae         | <i>Macridiscus multifarius</i>     | 0.45  | 0.66  | <i>Macridiscus aequilatera</i>   | 0     |
| Veneridae         | <i>Dosinia fibula</i>              | 0.28  | 0.63  | <i>Dosinia biscocta</i>          | 0     |
| Veneridae         | <i>Paphia textile</i>              | 0.63  | 0.63  | <i>Paphia undulata</i>           | 0     |
| Muricidae         | <i>Drupella margariticola</i>      | 2.95  | 8.89  | <i>Drupella rugosa</i>           | 8.28  |
| Plakobranchidae   | <i>Plakobranchus ocellatus</i>     | 11.57 | 14.92 | <i>Elysia ornata</i>             | 14.45 |
| Lottiidae         | <i>Nipponacmea schrenckii</i>      | 0.27  | 0.47  | <i>Nipponacmea radula</i>        | 0     |

|                 |                                  |      |      |                                  |      |
|-----------------|----------------------------------|------|------|----------------------------------|------|
| Nacellidae      | <i>Cellana radiata</i>           | 0.16 | 0.46 | <i>Cellana radiata enneagona</i> | 0    |
| Conidae         | <i>Conus lividus</i>             | 0.52 | 0.77 | <i>Conus sanguinolentus</i>      | 0.31 |
| Octopodidae     | <i>Octopus vulgaris</i>          | 0.12 | 0.32 | <i>Octopus oshimai</i>           | 0    |
| Columbellidae   | <i>Mitrella cf. tuberosa</i>     | 0.46 | 0.46 | <i>Mitrella bicincta</i>         | 0.15 |
| Turbinidae      | <i>Lunella coreensis</i>         | 0.1  | 0.31 | <i>Lunella moniliformis</i>      | 0    |
| Nassariidae     | <i>Nassarius siquijorensis</i>   | 3.87 | 5.79 | <i>Nassarius hepaticus</i>       | 5.5  |
| Muricidae       | <i>Ocenebrellus inornatus</i>    | 0.39 | 0.59 | <i>Neptunea cumingi</i>          | 0.3  |
| Muricidae       | <i>Rapana venosa</i>             | 0.4  | 0.73 | <i>Rapana bezoar</i>             | 0.46 |
| Pteriidae       | <i>Pinctada martensi</i>         | 0.25 | 0.25 | <i>Pinctada fucata</i>           | 0    |
| Nacellidae      | <i>Cellana radiata enneagona</i> | 0.16 | 0.16 | <i>Cellana radiata</i>           | 0    |
| Turbinidae      | <i>Lunella coronata</i>          | 0.1  | 0.15 | <i>Lunella granulata</i>         | 0    |
| Turbinidae      | <i>Lunella granulata</i>         | 0.08 | 0.15 | <i>Lunella coronata</i>          | 0    |
| Turbinidae      | <i>Lunella moniliformis</i>      | 0.1  | 0.15 | <i>Lunella coreensis</i>         | 0    |
| Plakobranchidae | <i>Elysia abei</i>               | 0.96 | 1.39 | <i>Elysia amakusana</i>          | 1.39 |
| Veneridae       | <i>Pelecypora isocardia</i>      | 0    | 0    | <i>Pelecypora trigona</i>        | 0    |

---

**Supplementary Table 3.** Results of SPIDER package analysis. BINs delimitation and BOLD nearest neighbour.

| Species                            | GenBank NO. | BM                                                 | BCM 0.01  | BCM 0.021 | BCM 0.053 | ASB 0.01  | ASB 0.021 | ASB 0.053 | NN                              |
|------------------------------------|-------------|----------------------------------------------------|-----------|-----------|-----------|-----------|-----------|-----------|---------------------------------|
| <i>Acanthochitona achates</i>      | HM180415    | <i>Acanthochitona achates</i>                      | ambiguous | ambiguous | ambiguous | ambiguous | ambiguous | ambiguous | <i>Acanthochitona defilippi</i> |
| <i>Acanthochitona achates</i>      | HM180416    | <i>Acanthochitona achates</i>                      | ambiguous | ambiguous | ambiguous | ambiguous | ambiguous | ambiguous | <i>Acanthochitona defilippi</i> |
| <i>Acanthochitona rubrolineata</i> | HM180427    | <i>Acanthochitona achates</i>                      | ambiguous | ambiguous | ambiguous | ambiguous | ambiguous | ambiguous | <i>Acanthochitona defilippi</i> |
| <i>Acanthochitona rubrolineata</i> | HM180428    | BOLD:ACB8074<br><i>Acanthochitona rubrolineata</i> | correct   | correct   | correct   | correct   | ambiguous | ambiguous | <i>Acanthochitona defilippi</i> |
| <i>Acanthochitona rubrolineata</i> | HM180429    | <i>Acanthochitona achates</i>                      | ambiguous | ambiguous | ambiguous | ambiguous | ambiguous | ambiguous | <i>Acanthochitona defilippi</i> |
| <i>Acanthochitona rubrolineata</i> | HM180430    | <i>Acanthochitona rubrolineata</i>                 | correct   | correct   | correct   | correct   | ambiguous | ambiguous | <i>Acanthochitona defilippi</i> |
| <i>Acanthochitona defilippi</i>    | HM180422    | <i>Acanthochitona defilippi</i>                    | incorrect | incorrect | incorrect | incorrect | incorrect | incorrect | <i>Acanthochitona defilippi</i> |
| <i>Acanthochitona defilippi</i>    | HM180417    | <i>Acanthochitona defilippi</i>                    | correct   | correct   | correct   | correct   | correct   | correct   | <i>Liolophura japonica</i>      |
| <i>Acanthochitona defilippi</i>    | HM180418    | BOLD:AAE6153<br><i>Acanthochitona defilippi</i>    | correct   | correct   | correct   | correct   | correct   | correct   | <i>Liolophura japonica</i>      |
| <i>Acanthochitona defilippi</i>    | HM180421    | <i>Acanthochitona defilippi</i>                    | correct   | correct   | correct   | correct   | correct   | correct   | <i>Liolophura japonica</i>      |
| <i>Acanthochitona defilippi</i>    | HM180419    | BOLD:AAE6152<br><i>Acanthochitona defilippi</i>    | no id     | no id     | no id     | no id     | no id     | no id     | <i>Liolophura japonica</i>      |
| <i>Adipicola crypta</i>            | AB539004    | <i>Adipicola crypta</i>                            | correct   | correct   | correct   | correct   | correct   | correct   | <i>Adipicola crypta</i>         |
| <i>Adipicola crypta</i>            | AB257519    | <i>Adipicola crypta</i>                            | correct   | correct   | correct   | correct   | correct   | correct   | <i>Adipicola crypta</i>         |
| <i>Adipicola crypta</i>            | AB257518    | BOLD:AAD3750<br><i>Adipicola crypta</i>            | correct   | correct   | correct   | correct   | correct   | correct   | <i>Adipicola crypta</i>         |
| <i>Adipicola crypta</i>            | AB257517    | <i>Adipicola crypta</i>                            | correct   | correct   | correct   | correct   | correct   | correct   | <i>Adipicola crypta</i>         |
| <i>Adipicola crypta</i>            | AB257516    | <i>Adipicola crypta</i>                            | correct   | correct   | correct   | correct   | correct   | correct   | <i>Adipicola crypta</i>         |
| <i>Adipicola crypta</i>            | AB257515    | <i>Adipicola crypta</i>                            | correct   | correct   | correct   | correct   | correct   | correct   | <i>Adipicola crypta</i>         |
| <i>Adipicola iwaotakii</i>         | AB257523    | <i>Adipicola iwaotakii</i>                         | correct   | correct   | correct   | correct   | correct   | correct   | <i>Idas sp.</i>                 |
| <i>Adipicola iwaotakii</i>         | AB257521    | <i>Adipicola iwaotakii</i>                         | correct   | correct   | correct   | correct   | correct   | correct   | <i>Idas sp.</i>                 |
| <i>Adipicola iwaotakii</i>         | AB257520    | BOLD:AAA7140<br><i>Adipicola iwaotakii</i>         | correct   | correct   | correct   | correct   | correct   | correct   | <i>Idas sp.</i>                 |
| <i>Adipicola iwaotakii</i>         | EU702325    | <i>Adipicola iwaotakii</i>                         | correct   | correct   | correct   | correct   | correct   | correct   | <i>Idas sp.</i>                 |
| <i>Adipicola iwaotakii</i>         | EU702324    | <i>Adipicola iwaotakii</i>                         | correct   | correct   | correct   | correct   | correct   | correct   | <i>Idas sp.</i>                 |
| <i>Adipicola iwaotakii</i>         | EU702323    | <i>Adipicola iwaotakii</i>                         | no id     | correct   | correct   | no id     | correct   | correct   | <i>Idas sp.</i>                 |
| <i>Adipicola pacifica</i>          | AB539005    | BOLD:ACH5470<br><i>Adipicola pacifica</i>          | correct   | correct   | correct   | correct   | correct   | correct   | <i>Bathymodiolus platifrons</i> |

|                                   |          |              |                                   |         |         |         |         |         |         |                                 |
|-----------------------------------|----------|--------------|-----------------------------------|---------|---------|---------|---------|---------|---------|---------------------------------|
| <i>Adipicola pacifica</i>         | HF545115 |              | <i>Adipicola pacifica</i>         | correct | correct | correct | correct | correct | correct | <i>Bathymodiolus platifrons</i> |
| <i>Adipicola pacifica</i>         | AB170040 |              | <i>Adipicola pacifica</i>         | no id   | correct | correct | no id   | correct | correct | <i>Bathymodiolus platifrons</i> |
| <i>Adipicola pacifica</i>         | AB257528 |              | <i>Adipicola pacifica</i>         | correct | correct | correct | correct | correct | correct | <i>Bathymodiolus platifrons</i> |
| <i>Adipicola pacifica</i>         | AB257527 |              | <i>Adipicola pacifica</i>         | correct | correct | correct | correct | correct | correct | <i>Bathymodiolus platifrons</i> |
| <i>Adipicola pacifica</i>         | AB257526 |              | <i>Adipicola pacifica</i>         | correct | correct | correct | correct | correct | correct | <i>Bathymodiolus platifrons</i> |
| <i>Alcyna ocellata</i>            | AB505278 | BOLD:ACB8409 | <i>Alcyna ocellata</i>            | correct | correct | correct | correct | correct | correct | <i>Alcyna ocellata</i>          |
| <i>Alcyna ocellata</i>            | AB505277 |              | <i>Alcyna ocellata</i>            | correct | correct | correct | correct | correct | correct | <i>Alcyna ocellata</i>          |
| <i>Amphioctopus aegina</i>        | HQ846132 |              | <i>Amphioctopus aegina</i>        | correct | correct | correct | correct | correct | correct | <i>Amphioctopus aegina</i>      |
| <i>Amphioctopus aegina</i>        | HQ846133 |              | <i>Amphioctopus aegina</i>        | correct | correct | correct | correct | correct | correct | <i>Amphioctopus aegina</i>      |
| <i>Amphioctopus aegina</i>        | HQ846134 |              | <i>Amphioctopus aegina</i>        | correct | correct | correct | correct | correct | correct | <i>Amphioctopus aegina</i>      |
| <i>Amphioctopus aegina</i>        | HQ846135 | BOLD:AAM5036 | <i>Amphioctopus aegina</i>        | correct | correct | correct | correct | correct | correct | <i>Amphioctopus aegina</i>      |
| <i>Amphioctopus aegina</i>        | HQ846136 |              | <i>Amphioctopus aegina</i>        | correct | correct | correct | correct | correct | correct | <i>Amphioctopus aegina</i>      |
| <i>Amphioctopus aegina</i>        | HQ846137 |              | <i>Amphioctopus aegina</i>        | correct | correct | correct | correct | correct | correct | <i>Amphioctopus aegina</i>      |
| <i>Amphioctopus aegina</i>        | JX456267 |              | <i>Amphioctopus aegina</i>        | correct | correct | correct | correct | correct | correct | <i>Amphioctopus aegina</i>      |
| <i>Amphioctopus fangshiao</i>     | HQ846126 |              | <i>Amphioctopus fangshiao</i>     | correct | correct | correct | correct | correct | correct | <i>Amphioctopus fangshiao</i>   |
| <i>Amphioctopus fangshiao</i>     | HQ846127 |              | <i>Amphioctopus fangshiao</i>     | correct | correct | correct | correct | correct | correct | <i>Amphioctopus fangshiao</i>   |
| <i>Amphioctopus fangshiao</i>     | HQ846114 | BOLD:AAE5989 | <i>Amphioctopus fangshiao</i>     | correct | correct | correct | correct | correct | correct | <i>Amphioctopus fangshiao</i>   |
| <i>Amphioctopus fangshiao</i>     | HQ846155 |              | <i>Amphioctopus fangshiao</i>     | correct | correct | correct | correct | correct | correct | <i>Amphioctopus fangshiao</i>   |
| <i>Amphioctopus fangshiao</i>     | AB430519 |              | <i>Amphioctopus fangshiao</i>     | correct | correct | correct | correct | correct | correct | <i>Amphioctopus fangshiao</i>   |
| <i>Amphioctopus fangshiao</i>     | AB430518 | BOLD:ABX6367 | <i>Amphioctopus fangshiao</i>     | no id   | no id   | no id   | no id   | no id   | no id   | <i>Amphioctopus fangshiao</i>   |
| <i>Amphioctopus kagoshimensis</i> | HQ846122 |              | <i>Amphioctopus kagoshimensis</i> | correct | correct | correct | correct | correct | correct | <i>Amphioctopus aegina</i>      |
| <i>Amphioctopus kagoshimensis</i> | HQ846123 |              | <i>Amphioctopus kagoshimensis</i> | correct | correct | correct | correct | correct | correct | <i>Amphioctopus aegina</i>      |
| <i>Amphioctopus kagoshimensis</i> | HQ846124 |              | <i>Amphioctopus kagoshimensis</i> | correct | correct | correct | correct | correct | correct | <i>Amphioctopus aegina</i>      |
| <i>Amphioctopus kagoshimensis</i> | HQ846125 |              | <i>Amphioctopus kagoshimensis</i> | correct | correct | correct | correct | correct | correct | <i>Amphioctopus aegina</i>      |
| <i>Amphioctopus kagoshimensis</i> | AB430520 |              | <i>Amphioctopus kagoshimensis</i> | correct | correct | correct | correct | correct | correct | <i>Amphioctopus aegina</i>      |
| <i>Amphioctopus marginatus</i>    | HQ846138 | BOLD:ABA8783 | <i>Amphioctopus marginatus</i>    | correct | correct | correct | correct | correct | correct | <i>Amphioctopus sp.</i>         |
| <i>Amphioctopus marginatus</i>    | HQ846139 |              | <i>Amphioctopus marginatus</i>    | correct | correct | correct | correct | correct | correct | <i>Amphioctopus sp.</i>         |
| <i>Amphioctopus marginatus</i>    | HQ846140 |              | <i>Amphioctopus marginatus</i>    | correct | correct | correct | correct | correct | correct | <i>Amphioctopus sp.</i>         |
| <i>Amphioctopus marginatus</i>    | HQ846141 |              | <i>Amphioctopus marginatus</i>    | correct | correct | correct | correct | correct | correct | <i>Amphioctopus sp.</i>         |
| <i>Amphioctopus marginatus</i>    | AB430522 |              | <i>Amphioctopus marginatus</i>    | correct | correct | correct | correct | correct | correct | <i>Amphioctopus sp.</i>         |
| <i>Amphioctopus marginatus</i>    | AB430521 |              | <i>Amphioctopus marginatus</i>    | correct | correct | correct | correct | correct | correct | <i>Amphioctopus sp.</i>         |



|                                       |          |                                       |         |         |         |         |         |         |                                 |
|---------------------------------------|----------|---------------------------------------|---------|---------|---------|---------|---------|---------|---------------------------------|
| <i>Anadara vellicata</i>              | KU341883 | <i>Anadara vellicata</i>              | correct | correct | correct | correct | correct | correct |                                 |
| <i>Anadara vellicata</i>              | KU341884 | <i>Anadara vellicata</i>              | correct | correct | correct | correct | correct | correct |                                 |
| <i>Anadara vellicata</i>              | KU341885 | <i>Anadara vellicata</i>              | correct | correct | correct | correct | correct | correct |                                 |
| <i>Anadara vellicata</i>              | KU341886 | <i>Anadara vellicata</i>              | correct | correct | correct | correct | correct | correct |                                 |
| <i>Anadara vellicata</i>              | KU341887 | <i>Anadara vellicata</i>              | correct | correct | correct | correct | correct | correct |                                 |
| <i>Anadara vellicata</i>              | KU341888 | <i>Anadara vellicata</i>              | correct | correct | correct | correct | correct | correct |                                 |
| <i>Anadara vellicata</i>              | KU341889 | <i>Anadara vellicata</i>              | correct | correct | correct | correct | correct | correct |                                 |
| <i>Anadara vellicata</i>              | KU341890 | <i>Anadara vellicata</i>              | correct | correct | correct | correct | correct | correct |                                 |
| <i>Angaria formosa</i>                | AM049342 | <i>Angaria formosa</i>                | no id   | correct | correct | no id   | correct | correct | <i>Angaria sp.</i>              |
| <i>Angaria formosa</i>                | AM049343 | <i>Angaria formosa</i>                | no id   | correct | correct | no id   | correct | correct | <i>Angaria sp.</i>              |
| <i>Anomalodiscus squamosus</i>        | HQ703048 | <i>Anomalodiscus squamosus</i>        | correct | correct | correct | correct | correct | correct | <i>Clausinella isabellina</i>   |
| <i>Anomalodiscus squamosus</i>        | HQ703049 | <i>Anomalodiscus squamosus</i>        | correct | correct | correct | correct | correct | correct | <i>Clausinella isabellina</i>   |
| <i>Anomalodiscus squamosus</i>        | HQ703050 | <i>Anomalodiscus squamosus</i>        | correct | correct | correct | correct | correct | correct | <i>Clausinella isabellina</i>   |
| <i>Anomalodiscus squamosus</i>        | HQ703051 | <i>Anomalodiscus squamosus</i>        | correct | correct | correct | correct | correct | correct | <i>Clausinella isabellina</i>   |
| <i>Anomalodiscus squamosus</i>        | HM124611 | <i>Anomalodiscus squamosus</i>        | correct | correct | correct | correct | correct | correct | <i>Clausinella isabellina</i>   |
| <i>Anteaeolidiella takanosimensis</i> | JX087530 | <i>Anteaeolidiella takanosimensis</i> | no id   | correct | correct | no id   | correct | correct | <i>Anteaeolidiella poshitra</i> |
| <i>Anteaeolidiella takanosimensis</i> | JX087529 | <i>Anteaeolidiella takanosimensis</i> | no id   | correct | correct | no id   | correct | correct | <i>Anteaeolidiella poshitra</i> |
| <i>Antigona lamellaris</i>            | HQ703334 | <i>Antigona lamellaris</i>            | correct | correct | correct | correct | correct | correct | <i>Eurhomalea lenticularis</i>  |
| <i>Antigona lamellaris</i>            | HQ703335 | <i>Antigona lamellaris</i>            | correct | correct | correct | correct | correct | correct | <i>Eurhomalea lenticularis</i>  |
| <i>Antigona lamellaris</i>            | HQ703336 | <i>Antigona lamellaris</i>            | correct | correct | correct | correct | correct | correct | <i>Eurhomalea lenticularis</i>  |
| <i>Antigona lamellaris</i>            | HQ703337 | <i>Antigona lamellaris</i>            | correct | correct | correct | correct | correct | correct | <i>Eurhomalea lenticularis</i>  |
| <i>Antigona lamellaris</i>            | HQ703338 | <i>Antigona lamellaris</i>            | correct | correct | correct | correct | correct | correct | <i>Eurhomalea lenticularis</i>  |
| <i>Antigona lamellaris</i>            | HQ703339 | <i>Antigona lamellaris</i>            | correct | correct | correct | correct | correct | correct | <i>Eurhomalea lenticularis</i>  |
| <i>Antigona lamellaris</i>            | HQ703340 | <i>Antigona lamellaris</i>            | correct | correct | correct | correct | correct | correct | <i>Eurhomalea lenticularis</i>  |
| <i>Antigona lamellaris</i>            | HQ703341 | <i>Antigona lamellaris</i>            | correct | correct | correct | correct | correct | correct | <i>Eurhomalea lenticularis</i>  |
| <i>Antigona lamellaris</i>            | HM124608 | <i>Antigona lamellaris</i>            | correct | correct | correct | correct | correct | correct | <i>Eurhomalea lenticularis</i>  |
| <i>Aplysia kurodai</i>                | JX560148 | <i>Aplysia kurodai</i>                | correct | correct | correct | correct | correct | correct | <i>Aplysia fasciata</i>         |
| <i>Aplysia kurodai</i>                | JX560147 | <i>Aplysia kurodai</i>                | correct | correct | correct | correct | correct | correct | <i>Aplysia fasciata</i>         |
| <i>Arca avellana</i>                  | HM180481 | <i>Arca avellana</i>                  | correct | correct | correct | correct | correct | correct | <i>Humilaria kennerleyi</i>     |
| <i>Arca avellana</i>                  | HM180482 | <i>Arca avellana</i>                  | correct | correct | correct | correct | correct | correct | <i>Humilaria kennerleyi</i>     |
| <i>Arca avellana</i>                  | HM180483 | <i>Arca avellana</i>                  | no id   | correct | correct | no id   | correct | correct | <i>Humilaria kennerleyi</i>     |

|                              |          |                              |         |         |         |         |         |         |                           |
|------------------------------|----------|------------------------------|---------|---------|---------|---------|---------|---------|---------------------------|
| <i>Arca navicularis</i>      | HQ258822 | <i>Arca navicularis</i>      | correct | correct | correct | correct | correct | correct |                           |
| <i>Arca navicularis</i>      | HQ258823 | <i>Arca navicularis</i>      | correct | correct | correct | correct | correct | correct |                           |
| <i>Arca navicularis</i>      | HQ258824 | <i>Arca navicularis</i>      | no id   | correct | correct | no id   | correct | correct |                           |
| <i>Arca navicularis</i>      | KU341928 | <i>Arca navicularis</i>      | correct | correct | correct | correct | correct | correct |                           |
| <i>Arca navicularis</i>      | KU341929 | <i>Arca navicularis</i>      | correct | correct | correct | correct | correct | correct |                           |
| <i>Architeuthis dux</i>      | KC701762 | <i>Architeuthis dux</i>      | correct | correct | correct | correct | correct | correct | <i>Todaropsis eblanae</i> |
| <i>Architeuthis dux</i>      | KC701757 | <i>Architeuthis dux</i>      | correct | correct | correct | correct | correct | correct | <i>Todaropsis eblanae</i> |
| <i>Architeuthis dux</i>      | KC701751 | <i>Architeuthis dux</i>      | correct | correct | correct | correct | correct | correct | <i>Todaropsis eblanae</i> |
| <i>Architeuthis dux</i>      | KC701741 | <i>Architeuthis dux</i>      | correct | correct | correct | correct | correct | correct | <i>Todaropsis eblanae</i> |
| <i>Architeuthis dux</i>      | KC701731 | <i>Architeuthis dux</i>      | correct | correct | correct | correct | correct | correct | <i>Todaropsis eblanae</i> |
| <i>Architeuthis dux</i>      | KC701730 | <i>Architeuthis dux</i>      | correct | correct | correct | correct | correct | correct | <i>Todaropsis eblanae</i> |
| <i>Arcopsis interplicata</i> | HQ258875 | <i>Arcopsis interplicata</i> | correct | correct | correct | correct | correct | correct |                           |
| <i>Arcopsis interplicata</i> | HQ258876 | <i>Arcopsis interplicata</i> | correct | correct | correct | correct | correct | correct |                           |
| <i>Arcopsis interplicata</i> | HQ258877 | <i>Arcopsis interplicata</i> | correct | correct | correct | correct | correct | correct |                           |
| <i>Arcopsis interplicata</i> | HQ258878 | <i>Arcopsis interplicata</i> | correct | correct | correct | correct | correct | correct |                           |
| <i>Arcopsis interplicata</i> | HQ258879 | <i>Arcopsis interplicata</i> | no id   | no id   | correct | no id   | no id   | correct |                           |
| <i>Argopecten irradians</i>  | GU120020 | <i>Argopecten irradians</i>  | correct | correct | correct | correct | correct | correct |                           |
| <i>Argopecten irradians</i>  | GU120021 | <i>Argopecten irradians</i>  | correct | correct | correct | correct | correct | correct |                           |
| <i>Argopecten irradians</i>  | GU120022 | <i>Argopecten irradians</i>  | correct | correct | correct | correct | correct | correct |                           |
| <i>Argopecten irradians</i>  | GU120023 | <i>Argopecten irradians</i>  | correct | correct | correct | correct | correct | correct |                           |
| <i>Argopecten irradians</i>  | GU120024 | <i>Argopecten irradians</i>  | correct | correct | correct | correct | correct | correct |                           |
| <i>Argopecten irradians</i>  | GU120025 | <i>Argopecten irradians</i>  | correct | correct | correct | correct | correct | correct |                           |
| <i>Atrina pectinata</i>      | AB059421 | <i>Atrina pectinata</i>      | correct | correct | correct | correct | correct | correct | <i>Atrina pectinata</i>   |
| <i>Atrina pectinata</i>      | AB059423 | <i>Atrina pectinata</i>      | correct | correct | correct | correct | correct | correct | <i>Atrina pectinata</i>   |
| <i>Atrina pectinata</i>      | AB059422 | <i>Atrina pectinata</i>      | correct | correct | correct | correct | correct | correct | <i>Atrina pectinata</i>   |
| <i>Atrina pectinata</i>      | AB059424 | <i>Atrina pectinata</i>      | no id   | correct | correct | no id   | correct | correct | <i>Atrina pectinata</i>   |
| <i>Atrina pectinata</i>      | AB076914 | <i>Atrina pectinata</i>      | correct | correct | correct | correct | correct | correct | <i>Atrina pectinata</i>   |
| <i>Babylonia areolata</i>    | JN053011 | <i>Babylonia areolata</i>    | correct | correct | correct | correct | correct | correct | <i>Babylonia areolata</i> |
| <i>Babylonia areolata</i>    | HQ834066 | <i>Babylonia areolata</i>    | correct | correct | correct | correct | correct | correct | <i>Babylonia areolata</i> |
| <i>Babylonia areolata</i>    | JN053013 | <i>Babylonia areolata</i>    | correct | correct | correct | correct | correct | correct | <i>Babylonia areolata</i> |
| <i>Babylonia areolata</i>    | JN053012 | <i>Babylonia areolata</i>    | correct | correct | correct | correct | correct | correct | <i>Babylonia areolata</i> |

|                                |          |                                |         |         |         |         |         |         |                                 |
|--------------------------------|----------|--------------------------------|---------|---------|---------|---------|---------|---------|---------------------------------|
| <i>Babylonia lutosa</i>        | JN053010 | <i>Babylonia areolata</i>      | no id   | no id   | no id   | no id   | no id   | no id   | <i>Babylonia areolata</i>       |
| <i>Barbatia fusca</i>          | AB050899 | <i>Barbatia lacerata</i>       | no id   | no id   | no id   | no id   | no id   | no id   | <i>Babylonia areolata</i>       |
| <i>Barbatia lacerata</i>       | HQ258828 | <i>Barbatia lacerata</i>       | correct | correct | correct | correct | correct | correct |                                 |
| <i>Barbatia lacerata</i>       | HQ258829 | <i>Barbatia lacerata</i>       | correct | correct | correct | correct | correct | correct |                                 |
| <i>Barbatia lacerata</i>       | HQ258830 | <i>Barbatia lacerata</i>       | no id   | correct | correct | no id   | correct | correct |                                 |
| <i>Barbatia lacerata</i>       | HQ258831 | <i>Barbatia lacerata</i>       | correct | correct | correct | correct | correct | correct |                                 |
| <i>Barbatia lacerata</i>       | HQ258832 | <i>Barbatia lacerata</i>       | correct | correct | correct | correct | correct | correct |                                 |
| <i>Barbatia lacerata</i>       | HQ258833 | <i>Barbatia lacerata</i>       | correct | correct | correct | correct | correct | correct |                                 |
| <i>Barbatia lacerata</i>       | HQ258834 | <i>Barbatia lacerata</i>       | correct | correct | correct | correct | correct | correct |                                 |
| <i>Barbatia lacerata</i>       | HQ258835 | <i>Barbatia lacerata</i>       | correct | correct | correct | correct | correct | correct |                                 |
| <i>Barbatia lacerata</i>       | HQ258826 | <i>Barbatia lacerata</i>       | correct | correct | correct | correct | correct | correct |                                 |
| <i>Barbatia lacerata</i>       | HQ258827 | <i>Barbatia lacerata</i>       | correct | correct | correct | correct | correct | correct |                                 |
| <i>Barbatia lacerata</i>       | HQ258836 | <i>Barbatia lacerata</i>       | no id   | correct | correct | no id   | correct | correct |                                 |
| <i>Barbatia lacerata</i>       | AB076932 | <i>Barbatia lacerata</i>       | no id   | correct | correct | no id   | correct | correct | <i>Barbatia tenera</i>          |
| <i>Barbatia lima</i>           | AB076931 | <i>Arcopsis interplicata</i>   | no id   | no id   | no id   | no id   | no id   | no id   | <i>Cucullaea labiata</i>        |
| <i>Barbatia virescens</i>      | KU341920 | <i>Barbatia virescens</i>      | correct | correct | correct | correct | correct | correct |                                 |
| <i>Barbatia virescens</i>      | KU341921 | <i>Barbatia virescens</i>      | correct | correct | correct | correct | correct | correct |                                 |
| <i>Barbatia virescens</i>      | KU341922 | <i>Barbatia virescens</i>      | correct | correct | correct | correct | correct | correct |                                 |
| <i>Barbatia virescens</i>      | KU341923 | <i>Barbatia virescens</i>      | correct | correct | correct | correct | correct | correct |                                 |
| <i>Barbatia virescens</i>      | KU341924 | <i>Barbatia virescens</i>      | correct | correct | correct | correct | correct | correct |                                 |
| <i>Barbatia virescens</i>      | KU341925 | <i>Barbatia virescens</i>      | correct | correct | correct | correct | correct | correct |                                 |
| <i>Barbatia virescens</i>      | KU341926 | <i>Barbatia virescens</i>      | correct | correct | correct | correct | correct | correct |                                 |
| <i>Barbatia virescens</i>      | KU341927 | <i>Barbatia virescens</i>      | correct | correct | correct | correct | correct | correct |                                 |
| <i>Barnea davidi</i>           | KJ125426 | <i>Barnea dilatata</i>         | no id   | no id   | no id   | no id   | no id   | no id   | <i>Barnea dilatata</i>          |
| <i>Barnea dilatata</i>         | KJ125414 | <i>Barnea dilatata</i>         | correct | correct | correct | correct | correct | correct | <i>Barnea davidi</i>            |
| <i>Barnea dilatata</i>         | KJ125415 | <i>Barnea dilatata</i>         | correct | correct | correct | correct | correct | correct | <i>Barnea davidi</i>            |
| <i>Bathymodiolus aduloides</i> | AB170054 | <i>Bathymodiolus aduloides</i> | correct | correct | correct | correct | correct | correct | <i>Bathymodiolus manusensis</i> |
| <i>Bathymodiolus aduloides</i> | AB170055 | <i>Bathymodiolus aduloides</i> | correct | correct | correct | correct | correct | correct | <i>Bathymodiolus manusensis</i> |
| <i>Bathymodiolus aduloides</i> | AB170056 | <i>Bathymodiolus aduloides</i> | correct | correct | correct | correct | correct | correct | <i>Bathymodiolus manusensis</i> |
| <i>Bathymodiolus aduloides</i> | AB170057 | <i>Bathymodiolus aduloides</i> | correct | correct | correct | correct | correct | correct | <i>Bathymodiolus manusensis</i> |
| <i>Bathymodiolus aduloides</i> | AB170058 | <i>Bathymodiolus aduloides</i> | correct | correct | correct | correct | correct | correct | <i>Bathymodiolus manusensis</i> |



|                                   |          |                                   |           |           |           |           |           |           |                                   |
|-----------------------------------|----------|-----------------------------------|-----------|-----------|-----------|-----------|-----------|-----------|-----------------------------------|
| <i>Bathymodiolus aduloides</i>    | AB170059 | <i>Bathymodiolus aduloides</i>    | correct   | correct   | correct   | correct   | correct   | correct   | <i>Bathymodiolus manusensis</i>   |
| <i>Bathymodiolus aduloides</i>    | HF545118 | <i>Bathymodiolus aduloides</i>    | correct   | correct   | correct   | correct   | correct   | correct   | <i>Bathymodiolus manusensis</i>   |
| <i>Bathymodiolus aduloides</i>    | AB597557 | <i>Bathymodiolus aduloides</i>    | correct   | correct   | correct   | correct   | correct   | correct   | <i>Bathymodiolus manusensis</i>   |
| <i>Bathymodiolus hirtus</i>       | AB250694 | <i>Bathymodiolus hirtus</i>       | correct   | correct   | correct   | correct   | correct   | correct   | <i>Idas sp.</i>                   |
| <i>Bathymodiolus hirtus</i>       | AB170047 | <i>Bathymodiolus hirtus</i>       | correct   | correct   | correct   | correct   | correct   | correct   | <i>Idas sp.</i>                   |
| <i>Bathymodiolus japonicus</i>    | HF545108 | <i>Bathymodiolus japonicus</i>    | correct   | correct   | correct   | correct   | correct   | correct   | <i>Bathymodiolus tangaroa</i>     |
| <i>Bathymodiolus japonicus</i>    | AB101422 | <i>Bathymodiolus japonicus</i>    | correct   | correct   | correct   | correct   | correct   | correct   | <i>Bathymodiolus tangaroa</i>     |
| <i>Bathymodiolus japonicus</i>    | AB101423 | <i>Bathymodiolus japonicus</i>    | correct   | correct   | correct   | correct   | correct   | correct   | <i>Bathymodiolus tangaroa</i>     |
| <i>Bathymodiolus platifrons</i>   | HF545106 | <i>Bathymodiolus platifrons</i>   | correct   | correct   | correct   | correct   | correct   | ambiguous | <i>Bathymodiolus mauritanicus</i> |
| <i>Bathymodiolus platifrons</i>   | AB101419 | <i>Bathymodiolus platifrons</i>   | no id     | no id     | correct   | no id     | no id     | correct   | <i>Bathymodiolus mauritanicus</i> |
| <i>Bathymodiolus platifrons</i>   | AB101420 | <i>Bathymodiolus platifrons</i>   | correct   | correct   | correct   | correct   | correct   | correct   | <i>Bathymodiolus mauritanicus</i> |
| <i>Bathymodiolus platifrons</i>   | AB101421 | <i>Bathymodiolus platifrons</i>   | correct   | correct   | correct   | correct   | correct   | correct   | <i>Bathymodiolus mauritanicus</i> |
| <i>Bathymodiolus platifrons</i>   | AB250695 | <i>Bathymodiolus platifrons</i>   | correct   | correct   | correct   | correct   | correct   | correct   | <i>Bathymodiolus mauritanicus</i> |
| <i>Bathymodiolus securiformis</i> | AB170048 | <i>Bathymodiolus securiformis</i> | no id     | correct   | correct   | no id     | correct   | correct   | <i>Gigantidas tangaroa</i>        |
| <i>Bathymodiolus securiformis</i> | AB170051 | <i>Bathymodiolus securiformis</i> | correct   | correct   | correct   | correct   | correct   | correct   | <i>Gigantidas tangaroa</i>        |
| <i>Bathymodiolus securiformis</i> | AB170052 | <i>Bathymodiolus securiformis</i> | correct   | correct   | correct   | correct   | correct   | correct   | <i>Gigantidas tangaroa</i>        |
| <i>Bathymodiolus securiformis</i> | AB170053 | <i>Bathymodiolus securiformis</i> | correct   | correct   | correct   | correct   | correct   | correct   | <i>Gigantidas tangaroa</i>        |
| <i>Bathymodiolus septemdierum</i> | AB101424 | <i>Bathymodiolus septemdierum</i> | no id     | no id     | correct   | no id     | no id     | correct   |                                   |
| <i>Bathymodiolus septemdierum</i> | AB101426 | <i>Bathymodiolus septemdierum</i> | no id     | no id     | correct   | no id     | no id     | correct   |                                   |
| <i>Bathymodiolus septemdierum</i> | AB101427 | <i>Bathymodiolus septemdierum</i> | no id     | no id     | correct   | no id     | no id     | correct   |                                   |
| <i>Bathymodiolus septemdierum</i> | AB101425 | <i>Bathymodiolus septemdierum</i> | correct   | correct   | correct   | correct   | correct   | correct   | <i>Bathymodiolus sp.</i>          |
| <i>Bathymodiolus septemdierum</i> | AB101428 | <i>Bathymodiolus septemdierum</i> | correct   | correct   | correct   | correct   | correct   | correct   | <i>Bathymodiolus sp.</i>          |
| <i>Bathymodiolus septemdierum</i> | AB101429 | <i>Bathymodiolus septemdierum</i> | correct   | correct   | correct   | correct   | correct   | correct   | <i>Bathymodiolus sp.</i>          |
| <i>Bathymodiolus septemdierum</i> | AB101430 | <i>Bathymodiolus septemdierum</i> | correct   | correct   | correct   | correct   | correct   | correct   | <i>Bathymodiolus sp.</i>          |
| <i>Bathymodiolus septemdierum</i> | AB170041 | <i>Bathymodiolus septemdierum</i> | correct   | correct   | correct   | correct   | correct   | correct   | <i>Bathymodiolus sp.</i>          |
| <i>Batillaria cumingii</i>        | JF693342 | <i>Batillaria cumingii</i>        | ambiguous | ambiguous | ambiguous | ambiguous | ambiguous | ambiguous | <i>Batillaria attramentaria</i>   |
| <i>Batillaria cumingii</i>        | JF693341 | <i>Batillaria cumingii</i>        | ambiguous | ambiguous | ambiguous | ambiguous | ambiguous | ambiguous | <i>Batillaria attramentaria</i>   |
| <i>Batillaria cumingii</i>        | JF693343 | <i>Batillaria cumingii</i>        | no id     | ambiguous | ambiguous | no id     | ambiguous | ambiguous | <i>Batillaria attramentaria</i>   |
| <i>Batillaria cumingii</i>        | AB535194 | <i>Batillaria cumingii</i>        | incorrect | incorrect | incorrect | incorrect | ambiguous | ambiguous | <i>Batillaria attramentaria</i>   |
| <i>Batillaria cumingii</i>        | AB535195 | <i>Batillaria cumingii</i>        | no id     | ambiguous | ambiguous | no id     | ambiguous | ambiguous | <i>Batillaria cumingii</i>        |
| <i>Batillaria zonalis</i>         | JF693339 | <i>Batillaria zonalis</i>         | correct   | correct   | correct   | correct   | correct   | correct   | <i>Batillaria cumingii</i>        |

|                                    |          |                                    |         |         |         |         |         |         |                                |
|------------------------------------|----------|------------------------------------|---------|---------|---------|---------|---------|---------|--------------------------------|
| <i>Batillaria zonalis</i>          | JF693340 | <i>Batillaria zonalis</i>          | correct | correct | correct | correct | correct | correct | <i>Batillaria cumingii</i>     |
| <i>Benthomodiolus geikotsucola</i> | AB679346 | <i>Benthomodiolus geikotsucola</i> | correct | correct | correct | correct | correct | correct | <i>Benthomodiolus sp.</i>      |
| <i>Benthomodiolus geikotsucola</i> | HF545103 | <i>Benthomodiolus geikotsucola</i> | correct | correct | correct | correct | correct | correct | <i>Benthomodiolus sp.</i>      |
| <i>Berryteuthis anonychus</i>      | AB749277 | <i>Gonatus kamtschaticus</i>       | no id   | no id   | no id   | no id   | no id   | no id   | <i>Berryteuthis anonychus</i>  |
| <i>Berryteuthis magister</i>       | AB749281 | <i>Gonatus madokai</i>             | no id   | no id   | no id   | no id   | no id   | no id   | <i>Gonatopsis borealis</i>     |
| <i>Bonartemis histrio</i>          | HQ703153 | <i>Bonartemis histrio</i>          | no id   | correct | correct | no id   | correct | correct | <i>Dosinia troscheli</i>       |
| <i>Bonartemis histrio</i>          | HQ703156 | <i>Bonartemis histrio</i>          | correct | correct | correct | correct | correct | correct | <i>Dosinia victoriae</i>       |
| <i>Boreotrophon xestra</i>         | HQ834056 | <i>Boreotrophon xestra</i>         | correct | correct | correct | correct | correct | correct | <i>Boreotrophon clathratus</i> |
| <i>Boreotrophon xestra</i>         | JN052994 | <i>Boreotrophon xestra</i>         | correct | correct | correct | correct | correct | correct | <i>Boreotrophon clathratus</i> |
| <i>Boreotrophon xestra</i>         | JN052993 | <i>Boreotrophon xestra</i>         | no id   | correct | correct | no id   | correct | correct | <i>Boreotrophon clathratus</i> |
| <i>Boreotrophon xestra</i>         | JN052992 | <i>Boreotrophon xestra</i>         | correct | correct | correct | correct | correct | correct | <i>Boreotrophon clathratus</i> |
| <i>Broderipia iridescens</i>       | AB505284 | <i>Broderipia iridescens</i>       | correct | correct | correct | correct | correct | correct | <i>Lirularia iridescens</i>    |
| <i>Broderipia iridescens</i>       | EU530139 | <i>Broderipia iridescens</i>       | correct | correct | correct | correct | correct | correct | <i>Lirularia iridescens</i>    |
| <i>Buccinum pemphigum</i>          | JN052999 | <i>Buccinum pemphigum</i>          | correct | correct | correct | correct | correct | correct | <i>Buccinum yokomaruuae</i>    |
| <i>Buccinum pemphigum</i>          | JN053000 | <i>Buccinum pemphigum</i>          | correct | correct | correct | correct | correct | correct | <i>Buccinum yokomaruuae</i>    |
| <i>Buccinum pemphigum</i>          | JN053001 | <i>Buccinum pemphigum</i>          | correct | correct | correct | correct | correct | correct | <i>Buccinum yokomaruuae</i>    |
| <i>Buccinum pemphigum</i>          | HQ834057 | <i>Buccinum pemphigum</i>          | correct | correct | correct | correct | correct | correct | <i>Buccinum yokomaruuae</i>    |
| <i>Buccinum pemphigum</i>          | HQ834058 | <i>Buccinum pemphigum</i>          | no id   | no id   | correct | no id   | no id   | correct | <i>Buccinum yokomaruuae</i>    |
| <i>Buccinum pemphigum</i>          | HQ834059 | <i>Buccinum pemphigum</i>          | correct | correct | correct | correct | correct | correct | <i>Buccinum yokomaruuae</i>    |
| <i>Buccinum yokomaruuae</i>        | JN052995 | <i>Buccinum yokomaruuae</i>        | correct | correct | correct | correct | correct | correct | <i>Buccinum pemphigum</i>      |
| <i>Buccinum yokomaruuae</i>        | JN052996 | <i>Buccinum yokomaruuae</i>        | correct | correct | correct | correct | correct | correct | <i>Buccinum pemphigum</i>      |
| <i>Buccinum yokomaruuae</i>        | JN052997 | <i>Buccinum yokomaruuae</i>        | correct | correct | correct | correct | correct | correct | <i>Buccinum pemphigum</i>      |
| <i>Buccinum yokomaruuae</i>        | JN052998 | <i>Buccinum yokomaruuae</i>        | correct | correct | correct | correct | correct | correct | <i>Buccinum pemphigum</i>      |
| <i>Bursa granularis</i>            | JF693344 | <i>Bursa granularis</i>            | correct | correct | correct | correct | correct | correct | <i>Naticidae sp.</i>           |
| <i>Bursa granularis</i>            | JF693345 | <i>Bursa granularis</i>            | correct | correct | correct | correct | correct | correct | <i>Naticidae sp.</i>           |
| <i>Bursa granularis</i>            | JF693346 | <i>Bursa granularis</i>            | correct | correct | correct | correct | correct | correct | <i>Naticidae sp.</i>           |
| <i>Bursa granularis</i>            | JF693347 | <i>Bursa granularis</i>            | correct | correct | correct | correct | correct | correct | <i>Naticidae sp.</i>           |
| <i>Bursa granularis</i>            | JF693348 | <i>Bursa granularis</i>            | no id   | no id   | correct | no id   | no id   | correct | <i>Naticidae sp.</i>           |
| <i>Bursa rana</i>                  | JF693349 | <i>Bursa rana</i>                  | correct | correct | correct | correct | correct | correct | <i>Bursa granularis</i>        |
| <i>Bursa rana</i>                  | JF693350 | <i>Bursa rana</i>                  | correct | correct | correct | correct | correct | correct | <i>Bursa granularis</i>        |
| <i>Bursa rana</i>                  | JF693351 | <i>Bursa rana</i>                  | correct | correct | correct | correct | correct | correct | <i>Bursa granularis</i>        |

|                                     |          |                                     |           |           |           |           |           |           |                                   |
|-------------------------------------|----------|-------------------------------------|-----------|-----------|-----------|-----------|-----------|-----------|-----------------------------------|
| <i>Bursa rana</i>                   | JF693352 | <i>Bursa rana</i>                   | correct   | correct   | correct   | correct   | correct   | correct   | <i>Bursa granularis</i>           |
| <i>Bursa rana</i>                   | JF693353 | <i>Bursa rana</i>                   | correct   | correct   | correct   | correct   | correct   | correct   | <i>Bursa granularis</i>           |
| <i>Calliostoma aculeatum</i>        | AB505271 | <i>Calliostoma sakashitai</i>       | no id     | incorrect | incorrect | no id     | incorrect | incorrect | <i>Calliostoma unicum</i>         |
| <i>Calliostoma sakashitai</i>       | AB365225 | <i>Calliostoma aculeatum</i>        | no id     | incorrect | incorrect | no id     | incorrect | incorrect | <i>Calliostoma unicum</i>         |
| <i>Calliostoma akoya</i>            | AB505272 | <i>Calliostoma consors</i>          | no id     | no id     | no id     | no id     | no id     | no id     | <i>Otukaia kiheiziebisu</i>       |
| <i>Calliostoma consors</i>          | FN435323 | <i>Calliostoma haliarchus</i>       | no id     | no id     | incorrect | no id     | no id     | incorrect | <i>Calliostoma haliarchus</i>     |
| <i>Calliostoma haliarchus</i>       | AB505273 | <i>Calliostoma consors</i>          | no id     | no id     | incorrect | no id     | no id     | incorrect | <i>Calliostoma unicum</i>         |
| <i>Calliostoma shinagawaensis</i>   | AB505275 | <i>Calliostoma consors</i>          | no id     | no id     | no id     | no id     | no id     | no id     | <i>Calliostoma unicum</i>         |
| <i>Callista brevisiphonata</i>      | HQ703037 | <i>Callista brevisiphonata</i>      | no id     | no id     | correct   | no id     | no id     | correct   | <i>Saxidomus purpuratus</i>       |
| <i>Callista brevisiphonata</i>      | HQ703038 | <i>Callista brevisiphonata</i>      | correct   | correct   | correct   | correct   | correct   | correct   | <i>Saxidomus purpuratus</i>       |
| <i>Callista brevisiphonata</i>      | HQ703039 | <i>Callista brevisiphonata</i>      | no id     | correct   | correct   | no id     | correct   | correct   | <i>Saxidomus purpuratus</i>       |
| <i>Callista brevisiphonata</i>      | HQ703040 | <i>Callista brevisiphonata</i>      | correct   | correct   | correct   | correct   | correct   | correct   | <i>Saxidomus purpuratus</i>       |
| <i>Callista brevisiphonata</i>      | JN898931 | <i>Callista brevisiphonata</i>      | no id     | correct   | correct   | no id     | correct   | correct   | <i>Saxidomus purpuratus</i>       |
| <i>Callista brevisiphonata</i>      | HM124569 | <i>Callista brevisiphonata</i>      | correct   | correct   | correct   | correct   | correct   | correct   | <i>Saxidomus purpuratus</i>       |
| <i>Callista chinensis</i>           | HQ703035 | <i>Callista chinensis</i>           | correct   | correct   | correct   | correct   | correct   | correct   | <i>Callista chione</i>            |
| <i>Callista chinensis</i>           | HQ703036 | <i>Callista chinensis</i>           | no id     | no id     | correct   | no id     | no id     | correct   | <i>Callista chione</i>            |
| <i>Callistoctopus aspilosomatis</i> | AB430525 | <i>Callistoctopus ornatus</i>       | no id     | no id     | no id     | no id     | no id     | no id     | <i>Callistoctopus sp.</i>         |
| <i>Callistoctopus luteus</i>        | AB430526 | <i>Callistoctopus luteus</i>        | correct   | correct   | correct   | correct   | correct   | correct   | <i>Callistoctopus luteus</i>      |
| <i>Callistoctopus luteus</i>        | AB430527 | <i>Callistoctopus luteus</i>        | correct   | correct   | correct   | correct   | correct   | correct   | <i>Callistoctopus luteus</i>      |
| <i>Callistoctopus minor</i>         | HQ846113 | <i>Callistoctopus minor</i>         | ambiguous | ambiguous | ambiguous | ambiguous | ambiguous | ambiguous | <i>Octopus sp.</i>                |
| <i>Callistoctopus minor</i>         | HQ846115 | <i>Callistoctopus minor</i>         | ambiguous | ambiguous | ambiguous | ambiguous | ambiguous | ambiguous | <i>Octopus sp.</i>                |
| <i>Callistoctopus minor</i>         | HQ846116 | <i>Callistoctopus minor</i>         | ambiguous | ambiguous | ambiguous | ambiguous | ambiguous | ambiguous | <i>Octopus sp.</i>                |
| <i>Callistoctopus minor</i>         | HQ846117 | <i>Callistoctopus minor</i>         | ambiguous | ambiguous | ambiguous | ambiguous | ambiguous | ambiguous | <i>Octopus sp.</i>                |
| <i>Callistoctopus minor</i>         | HQ846118 | <i>Callistoctopus minor</i>         | ambiguous | ambiguous | ambiguous | ambiguous | ambiguous | ambiguous | <i>Octopus sp.</i>                |
| <i>Callistoctopus minor</i>         | HQ846119 | <i>Callistoctopus minor</i>         | ambiguous | ambiguous | ambiguous | ambiguous | ambiguous | ambiguous | <i>Octopus sp.</i>                |
| <i>Callistoctopus minor</i>         | AB430541 | <i>Callistoctopus minor</i>         | incorrect | incorrect | incorrect | incorrect | incorrect | incorrect | <i>Octopus sp.</i>                |
| <i>Callistoctopus ornatus</i>       | AB430528 | <i>Callistoctopus aspilosomatis</i> | no id     | no id     | no id     | no id     | no id     | no id     | <i>Macrotritopus defilippi</i>    |
| <i>Calyptogena extenta</i>          | AB479085 | <i>Calyptogena kawamurai</i>        | no id     | no id     | no id     | no id     | no id     | no id     | <i>Calyptogena okutanii</i>       |
| <i>Calyptogena kawamurai</i>        | AB479089 | <i>Calyptogena extenta</i>          | no id     | no id     | no id     | no id     | no id     | no id     | <i>Calyptogena okutanii</i>       |
| <i>Calyptogena phaseoliformis</i>   | AB479088 | <i>Calyptogena kawamurai</i>        | no id     | no id     | no id     | no id     | no id     | no id     | <i>Calyptogena phaseoliformis</i> |
| <i>Cantharidus bisbalteatus</i>     | AB505279 | <i>Cantharidus jessoensis</i>       | incorrect | incorrect | incorrect | incorrect | incorrect | incorrect | <i>Cantharidus callichroa</i>     |

|                               |          |                                 |           |           |           |           |           |           |                               |
|-------------------------------|----------|---------------------------------|-----------|-----------|-----------|-----------|-----------|-----------|-------------------------------|
| <i>Cantharidus jessoensis</i> | AB505282 | <i>Diloma suavis</i>            | no id     | no id     | no id     | no id     | no id     | no id     | <i>Cantharidus callichroa</i> |
| <i>Cantharidus callichroa</i> | AB505280 | <i>Cantharidus bisbalteatus</i> | incorrect | incorrect | incorrect | incorrect | incorrect | incorrect | <i>Cantharidus callichroa</i> |
| <i>Cantharidus callichroa</i> | EU530120 | <i>Cantharidus callichroa</i>   | no id     | correct   | correct   | no id     | correct   | correct   | <i>Cantharidus callichroa</i> |
| <i>Cantharidus callichroa</i> | AM049338 | <i>Cantharidus callichroa</i>   | no id     | correct   | correct   | no id     | correct   | correct   | <i>Cantharidus callichroa</i> |
| <i>Cantharidus infuscatus</i> | EU530119 | <i>Cantharidus callichroa</i>   | no id     | correct   | correct   | no id     | correct   | correct   | <i>Phorcus lineatus</i>       |
| <i>Cantharus cecillei</i>     | HQ834063 | <i>Cantharus cecillei</i>       | correct   | correct   | correct   | correct   | correct   | correct   | <i>Buccinidae sp.</i>         |
| <i>Cantharus cecillei</i>     | JN053007 | <i>Cantharus cecillei</i>       | correct   | correct   | correct   | correct   | correct   | correct   | <i>Buccinidae sp.</i>         |
| <i>Cantharus melanostomus</i> | HQ834062 | <i>Cantharus melanostomus</i>   | correct   | correct   | correct   | correct   | correct   | correct   | <i>Cantharus spiralis</i>     |
| <i>Cantharus melanostomus</i> | JN053038 | <i>Cantharus melanostomus</i>   | correct   | correct   | correct   | correct   | correct   | correct   | <i>Cantharus spiralis</i>     |
| <i>Cellana mazatlandica</i>   | GQ455951 | <i>Cellana mazatlandica</i>     | correct   | correct   | correct   | correct   | correct   | correct   | <i>Cellana grata</i>          |
| <i>Cellana mazatlandica</i>   | GQ455952 | <i>Cellana mazatlandica</i>     | correct   | correct   | correct   | correct   | correct   | correct   | <i>Cellana grata</i>          |
| <i>Cellana mazatlandica</i>   | GQ455953 | <i>Cellana mazatlandica</i>     | correct   | correct   | correct   | correct   | correct   | correct   | <i>Cellana grata</i>          |
| <i>Cellana mazatlandica</i>   | GQ455954 | <i>Cellana mazatlandica</i>     | no id     | correct   | correct   | no id     | correct   | correct   | <i>Cellana grata</i>          |
| <i>Cellana mazatlandica</i>   | GQ455955 | <i>Cellana mazatlandica</i>     | correct   | correct   | correct   | correct   | correct   | correct   | <i>Cellana grata</i>          |
| <i>Cellana mazatlandica</i>   | AB433635 | <i>Cellana mazatlandica</i>     | correct   | correct   | correct   | correct   | correct   | correct   | <i>Cellana grata</i>          |
| <i>Cellana mazatlandica</i>   | AB433636 | <i>Cellana mazatlandica</i>     | correct   | correct   | correct   | correct   | correct   | correct   | <i>Cellana grata</i>          |
| <i>Cellana mazatlandica</i>   | AB433637 | <i>Cellana mazatlandica</i>     | correct   | correct   | correct   | correct   | correct   | correct   | <i>Cellana grata</i>          |
| <i>Cellana mazatlandica</i>   | AB433638 | <i>Cellana mazatlandica</i>     | correct   | correct   | correct   | correct   | correct   | correct   | <i>Cellana grata</i>          |
| <i>Cellana mazatlandica</i>   | AB433639 | <i>Cellana mazatlandica</i>     | correct   | correct   | correct   | correct   | correct   | correct   | <i>Cellana grata</i>          |
| <i>Cellana mazatlandica</i>   | AB433640 | <i>Cellana mazatlandica</i>     | correct   | correct   | correct   | correct   | correct   | correct   | <i>Cellana grata</i>          |
| <i>Cellana mazatlandica</i>   | AB433641 | <i>Cellana mazatlandica</i>     | correct   | correct   | correct   | correct   | correct   | correct   | <i>Cellana grata</i>          |
| <i>Cellana mazatlandica</i>   | AB433642 | <i>Cellana mazatlandica</i>     | correct   | correct   | correct   | correct   | correct   | correct   | <i>Cellana grata</i>          |
| <i>Cellana grata</i>          | KM221067 | <i>Cellana grata</i>            | correct   | correct   | correct   | correct   | correct   | correct   | <i>Cellana mazatlandica</i>   |
| <i>Cellana grata</i>          | KM221072 | <i>Cellana grata</i>            | correct   | correct   | correct   | correct   | correct   | correct   | <i>Cellana mazatlandica</i>   |
| <i>Cellana grata</i>          | KM221155 | <i>Cellana grata</i>            | correct   | correct   | correct   | correct   | correct   | correct   | <i>Cellana mazatlandica</i>   |
| <i>Cellana grata</i>          | KM221156 | <i>Cellana grata</i>            | correct   | correct   | correct   | correct   | correct   | correct   | <i>Cellana mazatlandica</i>   |
| <i>Cellana grata</i>          | KM221095 | <i>Cellana grata</i>            | correct   | correct   | correct   | correct   | correct   | correct   | <i>Cellana mazatlandica</i>   |
| <i>Cellana grata</i>          | KM221105 | <i>Cellana grata</i>            | correct   | correct   | correct   | correct   | correct   | correct   | <i>Cellana mazatlandica</i>   |
| <i>Cellana grata</i>          | GQ455945 | <i>Cellana grata</i>            | correct   | correct   | correct   | correct   | correct   | correct   | <i>Cellana mazatlandica</i>   |
| <i>Cellana grata</i>          | GQ455946 | <i>Cellana grata</i>            | correct   | correct   | correct   | correct   | correct   | correct   | <i>Cellana mazatlandica</i>   |
| <i>Cellana grata</i>          | GQ455948 | <i>Cellana grata</i>            | ambiguous | ambiguous | ambiguous | ambiguous | ambiguous | ambiguous | <i>Cellana mazatlandica</i>   |

















|                                    |          |                                 |           |           |           |           |           |           |                                       |
|------------------------------------|----------|---------------------------------|-----------|-----------|-----------|-----------|-----------|-----------|---------------------------------------|
| <i>Cerithidea rhizophorarum</i>    | HE680285 | <i>Cerithidea rhizophorarum</i> | correct   | correct   | correct   | correct   | correct   | correct   | <i>Cerithidea ornate</i>              |
| <i>Chicoreus asianus</i>           | GU188200 | <i>Chicoreus asianus</i>        | correct   | correct   | correct   | correct   | correct   | correct   | <i>Hexaplex chicoreus</i>             |
| <i>Chicoreus asianus</i>           | GU188201 | <i>Chicoreus asianus</i>        | correct   | correct   | correct   | correct   | correct   | correct   | <i>Hexaplex chicoreus</i>             |
| <i>Chicoreus asianus</i>           | GU188202 | <i>Chicoreus asianus</i>        | correct   | correct   | correct   | correct   | correct   | correct   | <i>Hexaplex chicoreus</i>             |
| <i>Chicoreus asianus</i>           | GU188203 | <i>Chicoreus asianus</i>        | correct   | correct   | correct   | correct   | correct   | correct   | <i>Hexaplex chicoreus</i>             |
| <i>Chicoreus asianus</i>           | GU188204 | <i>Chicoreus asianus</i>        | correct   | correct   | correct   | correct   | correct   | correct   | <i>Hexaplex chicoreus</i>             |
| <i>Chicoreus asianus</i>           | GU188205 | <i>Chicoreus asianus</i>        | correct   | correct   | correct   | correct   | correct   | correct   | <i>Hexaplex chicoreus</i>             |
| <i>Chicoreus torrefactus</i>       | GU188208 | <i>Chicoreus torrefactus</i>    | correct   | correct   | correct   | correct   | correct   | correct   | <i>Chicoreus brunneus</i>             |
| <i>Chicoreus torrefactus</i>       | GU188209 | <i>Chicoreus torrefactus</i>    | correct   | correct   | correct   | correct   | correct   | correct   | <i>Chicoreus brunneus</i>             |
| <i>Chicoreus torrefactus</i>       | GU188210 | <i>Chicoreus torrefactus</i>    | correct   | correct   | correct   | correct   | correct   | correct   | <i>Chicoreus brunneus</i>             |
| <i>Chicoreus torrefactus</i>       | GU188211 | <i>Chicoreus torrefactus</i>    | correct   | correct   | correct   | correct   | correct   | correct   | <i>Chicoreus brunneus</i>             |
| <i>Chlamys farreri</i>             | GU119998 | <i>Chlamys farreri</i>          | correct   | correct   | correct   | correct   | correct   | correct   |                                       |
| <i>Chlamys farreri</i>             | GU119999 | <i>Chlamys farreri</i>          | correct   | correct   | correct   | correct   | correct   | correct   |                                       |
| <i>Chlamys farreri</i>             | GU120000 | <i>Chlamys farreri</i>          | correct   | correct   | correct   | correct   | correct   | correct   |                                       |
| <i>Chlamys farreri</i>             | FJ595957 | <i>Chlamys farreri</i>          | correct   | correct   | correct   | correct   | correct   | correct   | <i>Laevichlamys squamosa</i>          |
| <i>Chlorostoma lischkei</i>        | EU530145 | <i>Chlorostoma lischkei</i>     | correct   | correct   | correct   | correct   | correct   | correct   | <i>Chlorostoma lischkei</i>           |
| <i>Chlorostoma lischkei</i>        | EU530144 | <i>Chlorostoma lischkei</i>     | correct   | correct   | correct   | correct   | correct   | correct   | <i>Chlorostoma lischkei</i>           |
| <i>Omphalius rusticus</i>          | HM180735 | <i>Chlorostoma turbinatum</i>   | incorrect | incorrect | incorrect | incorrect | incorrect | incorrect | <i>Omphalius pfeifferi carpenteri</i> |
| <i>Omphalius rusticus rusticus</i> | HM180733 | <i>Chlorostoma turbinatum</i>   | no id     | ambiguous | ambiguous | no id     | ambiguous | ambiguous | <i>Omphalius pfeifferi carpenteri</i> |
| <i>Omphalius rusticus rusticus</i> | HM180734 | <i>Chlorostoma turbinatum</i>   | incorrect | incorrect | incorrect | incorrect | ambiguous | ambiguous | <i>Omphalius pfeifferi carpenteri</i> |
| <i>Chlorostoma turbinatum</i>      | HM180511 | <i>Chlorostoma turbinatum</i>   | ambiguous | ambiguous | ambiguous | ambiguous | ambiguous | ambiguous | <i>Omphalius pfeifferi carpenteri</i> |
| <i>Chlorostoma turbinatum</i>      | HM180512 | <i>Chlorostoma turbinatum</i>   | ambiguous | ambiguous | ambiguous | ambiguous | ambiguous | ambiguous | <i>Omphalius pfeifferi carpenteri</i> |
| <i>Chlorostoma turbinatum</i>      | HM180513 | <i>Chlorostoma turbinatum</i>   | ambiguous | ambiguous | ambiguous | ambiguous | ambiguous | ambiguous | <i>Omphalius pfeifferi carpenteri</i> |
| <i>Chlorostoma turbinatum</i>      | HM180514 | <i>Chlorostoma turbinatum</i>   | ambiguous | ambiguous | ambiguous | ambiguous | ambiguous | ambiguous | <i>Omphalius pfeifferi carpenteri</i> |
| <i>Chlorostoma turbinatum</i>      | HM180515 | <i>Chlorostoma turbinatum</i>   | ambiguous | ambiguous | ambiguous | ambiguous | ambiguous | ambiguous | <i>Omphalius pfeifferi carpenteri</i> |
| <i>Chlorostoma turbinatum</i>      | HM180516 | <i>Chlorostoma turbinatum</i>   | ambiguous | ambiguous | ambiguous | ambiguous | ambiguous | ambiguous | <i>Omphalius pfeifferi carpenteri</i> |
| <i>Chlorostoma turbinatum</i>      | HM180517 | <i>Chlorostoma turbinatum</i>   | ambiguous | ambiguous | ambiguous | ambiguous | ambiguous | ambiguous | <i>Omphalius pfeifferi carpenteri</i> |
| <i>Chlorostoma turbinatum</i>      | HM180518 | <i>Chlorostoma turbinatum</i>   | ambiguous | ambiguous | ambiguous | ambiguous | ambiguous | ambiguous | <i>Omphalius pfeifferi carpenteri</i> |
| <i>Chlorostoma turbinatum</i>      | HM180519 | <i>Chlorostoma turbinatum</i>   | ambiguous | ambiguous | ambiguous | ambiguous | ambiguous | ambiguous | <i>Omphalius pfeifferi carpenteri</i> |
| <i>Chlorostoma turbinatum</i>      | HM180520 | <i>Chlorostoma turbinatum</i>   | ambiguous | ambiguous | ambiguous | ambiguous | ambiguous | ambiguous | <i>Omphalius pfeifferi carpenteri</i> |
| <i>Chlorostoma turbinatum</i>      | HM180521 | <i>Chlorostoma turbinatum</i>   | ambiguous | ambiguous | ambiguous | ambiguous | ambiguous | ambiguous | <i>Omphalius pfeifferi carpenteri</i> |

|                                   |          |                                    |           |           |           |           |           |           |                                       |
|-----------------------------------|----------|------------------------------------|-----------|-----------|-----------|-----------|-----------|-----------|---------------------------------------|
| <i>Chlorostoma turbinatum</i>     | HM180523 | <i>Chlorostoma turbinatum</i>      | no id     | no id     | no id     | no id     | no id     | no id     | <i>Omphalius pfeifferi carpenteri</i> |
| <i>Chlorostoma turbinatum</i>     | HM180524 | <i>Chlorostoma turbinatum</i>      | ambiguous | ambiguous | ambiguous | ambiguous | ambiguous | ambiguous | <i>Omphalius pfeifferi carpenteri</i> |
| <i>Chlorostoma turbinatum</i>     | HM180525 | <i>Chlorostoma turbinatum</i>      | ambiguous | ambiguous | ambiguous | ambiguous | ambiguous | ambiguous | <i>Omphalius pfeifferi carpenteri</i> |
| <i>Chlorostoma turbinatum</i>     | HM180526 | <i>Chlorostoma turbinatum</i>      | ambiguous | ambiguous | ambiguous | ambiguous | ambiguous | ambiguous | <i>Omphalius pfeifferi carpenteri</i> |
| <i>Chlorostoma turbinatum</i>     | HM180522 | <i>Chlorostoma turbinatum</i>      | ambiguous | ambiguous | ambiguous | ambiguous | ambiguous | ambiguous | <i>Chlorostoma turbinatum</i>         |
| <i>Circe scripta</i>              | HQ703107 | <i>Circe scripta</i>               | correct   | correct   | correct   | correct   | correct   | correct   | <i>Circe scripta</i>                  |
| <i>Circe scripta</i>              | HQ703108 | <i>Circe scripta</i>               | correct   | correct   | correct   | correct   | correct   | correct   | <i>Circe scripta</i>                  |
| <i>Circe scripta</i>              | HQ703109 | <i>Circe scripta</i>               | correct   | correct   | correct   | correct   | correct   | correct   | <i>Circe scripta</i>                  |
| <i>Circe scripta</i>              | HQ703110 | <i>Circe scripta</i>               | correct   | correct   | correct   | correct   | correct   | correct   | <i>Circe scripta</i>                  |
| <i>Circe scripta</i>              | HQ703111 | <i>Circe scripta</i>               | correct   | correct   | correct   | correct   | correct   | correct   | <i>Circe scripta</i>                  |
| <i>Circe scripta</i>              | HQ703112 | <i>Circe scripta</i>               | correct   | correct   | correct   | correct   | correct   | correct   | <i>Circe scripta</i>                  |
| <i>Circe scripta</i>              | HQ703113 | <i>Circe scripta</i>               | correct   | correct   | correct   | correct   | correct   | correct   | <i>Circe scripta</i>                  |
| <i>Circe scripta</i>              | HQ703114 | <i>Circe scripta</i>               | correct   | correct   | correct   | correct   | correct   | correct   | <i>Circe scripta</i>                  |
| <i>Cistopus indicus</i>           | JX456269 | <i>Cistopus taiwanicus</i>         | incorrect | incorrect | incorrect | incorrect | incorrect | incorrect | <i>Cistopus indicus</i>               |
| <i>Cistopus taiwanicus</i>        | HQ846142 | <i>Cistopus indicus</i>            | ambiguous | ambiguous | ambiguous | ambiguous | ambiguous | ambiguous | <i>Cistopus indicus</i>               |
| <i>Cistopus taiwanicus</i>        | HQ846143 | <i>Cistopus indicus</i>            | ambiguous | ambiguous | ambiguous | ambiguous | ambiguous | ambiguous | <i>Cistopus indicus</i>               |
| <i>Clanculus bronni</i>           | AB505296 | <i>Trochus maculatus</i>           | no id     | no id     | no id     | no id     | no id     | no id     | <i>Bathymophila sp.</i>               |
| <i>Clanculus margaritarius</i>    | AB505297 | <i>Trochus maculatus</i>           | no id     | no id     | no id     | no id     | no id     | no id     | <i>Trochidae sp.</i>                  |
| <i>Clanculus microdon</i>         | AB505298 | <i>Pseudostomatella decolorata</i> | no id     | no id     | no id     | no id     | no id     | no id     | <i>Trochidae sp.</i>                  |
| <i>Clinocardium californiense</i> | JN860022 | <i>Clinocardium californiense</i>  | correct   | correct   | correct   | correct   | correct   | correct   | <i>Keenocardium blandum</i>           |
| <i>Clinocardium californiense</i> | JN860023 | <i>Clinocardium californiense</i>  | correct   | correct   | correct   | correct   | correct   | correct   | <i>Keenocardium blandum</i>           |
| <i>Clinocardium californiense</i> | JN860024 | <i>Clinocardium californiense</i>  | correct   | correct   | correct   | correct   | correct   | correct   | <i>Keenocardium blandum</i>           |
| <i>Clinocardium californiense</i> | JN860025 | <i>Clinocardium californiense</i>  | correct   | correct   | correct   | correct   | correct   | correct   | <i>Keenocardium blandum</i>           |
| <i>Clinocardium californiense</i> | JN860026 | <i>Clinocardium californiense</i>  | correct   | correct   | correct   | correct   | correct   | correct   | <i>Keenocardium blandum</i>           |
| <i>Clinocardium californiense</i> | JN860027 | <i>Clinocardium californiense</i>  | correct   | correct   | correct   | correct   | correct   | correct   | <i>Keenocardium blandum</i>           |
| <i>Clypeomorus humilis</i>        | JF693365 | <i>Clypeomorus humilis</i>         | no id     | no id     | no id     | no id     | no id     | no id     | <i>Batillaria cumingii</i>            |
| <i>Clypeomorus humilis</i>        | JF693366 | <i>Clypeomorus humilis</i>         | incorrect | incorrect | incorrect | incorrect | incorrect | incorrect | <i>Planaxis sulcatus</i>              |
| <i>Planaxis sulcatus</i>          | JF693413 | <i>Planaxis sulcatus</i>           | no id     | ambiguous | ambiguous | no id     | ambiguous | ambiguous | <i>Planaxis sulcatus</i>              |
| <i>Planaxis sulcatus</i>          | JF693411 | <i>Planaxis sulcatus</i>           | ambiguous | ambiguous | ambiguous | ambiguous | ambiguous | ambiguous | <i>Planaxis sulcatus</i>              |
| <i>Planaxis sulcatus</i>          | JF693414 | <i>Planaxis sulcatus</i>           | ambiguous | ambiguous | ambiguous | ambiguous | ambiguous | ambiguous | <i>Planaxis sulcatus</i>              |
| <i>Planaxis sulcatus</i>          | JF693412 | <i>Planaxis sulcatus</i>           | ambiguous | ambiguous | ambiguous | ambiguous | ambiguous | ambiguous | <i>Planaxis sulcatus</i>              |

|                                 |          |                                 |           |           |           |           |           |           |                                |
|---------------------------------|----------|---------------------------------|-----------|-----------|-----------|-----------|-----------|-----------|--------------------------------|
| <i>Planaxis sulcatus</i>        | JF693415 | <i>Planaxis sulcatus</i>        | ambiguous | ambiguous | ambiguous | ambiguous | ambiguous | ambiguous | <i>Planaxis sulcatus</i>       |
| <i>Clypeomorus trailli</i>      | JF693363 | <i>Clypeomorus trailli</i>      | correct   | correct   | correct   | correct   | correct   | correct   | <i>Clypeomorus brevis</i>      |
| <i>Clypeomorus trailli</i>      | JF693364 | <i>Clypeomorus trailli</i>      | correct   | correct   | correct   | correct   | correct   | correct   | <i>Clypeomorus brevis</i>      |
| <i>Coccoligya punctoradiata</i> | AB238590 | <i>Coccoligya punctoradiata</i> | correct   | correct   | correct   | correct   | correct   | correct   | <i>Cocculina sp.</i>           |
| <i>Coccoligya punctoradiata</i> | AB365259 | <i>Coccoligya punctoradiata</i> | correct   | correct   | correct   | correct   | correct   | correct   | <i>Cocculina sp.</i>           |
| <i>Coelomactra antiquata</i>    | JN674607 | <i>Coelomactra antiquata</i>    | no id     | correct   | correct   | no id     | correct   | correct   | <i>Maetra cumingii</i>         |
| <i>Coelomactra antiquata</i>    | JN674608 | <i>Coelomactra antiquata</i>    | no id     | correct   | correct   | no id     | correct   | correct   | <i>Maetra cumingii</i>         |
| <i>Coelomactra antiquata</i>    | JN674609 | <i>Coelomactra antiquata</i>    | no id     | no id     | no id     | no id     | no id     | no id     | <i>Maetra cumingii</i>         |
| <i>Maetra cumingii</i>          | JN674610 | <i>Coelomactra cumingii</i>     | correct   | correct   | correct   | correct   | correct   | correct   | <i>Coelomactra antiquata</i>   |
| <i>Maetra cumingii</i>          | JN674611 | <i>Coelomactra cumingii</i>     | correct   | correct   | correct   | correct   | correct   | correct   | <i>Coelomactra antiquata</i>   |
| <i>Maetra cumingii</i>          | JN674612 | <i>Coelomactra cumingii</i>     | correct   | correct   | correct   | correct   | correct   | correct   | <i>Coelomactra antiquata</i>   |
| <i>Collonista amakusaensis</i>  | AM049345 | <i>Collonista costulosa</i>     | no id     | no id     | no id     | no id     | no id     | no id     | <i>Collonista costulosa</i>    |
| <i>Collonista costulosa</i>     | AM049346 | <i>Collonista amakusaensis</i>  | no id     | no id     | no id     | no id     | no id     | no id     | <i>Collonista amakusaensis</i> |
| <i>Conotalopia mustelina</i>    | AB505302 | <i>Trochus histrio</i>          | no id     | no id     | no id     | no id     | no id     | no id     | <i>Lirularia iridescens</i>    |
| <i>Conotalopia ornata</i>       | AB505303 | <i>Littoraria sinensis</i>      | no id     | no id     | no id     | no id     | no id     | no id     | <i>Lirularia succincta</i>     |
| <i>Conus betulinus</i>          | HQ834088 | <i>Conus betulinus</i>          | correct   | correct   | correct   | correct   | correct   | correct   | <i>Conus loroisii</i>          |
| <i>Conus betulinus</i>          | JN053043 | <i>Conus betulinus</i>          | correct   | correct   | correct   | correct   | correct   | correct   | <i>Conus loroisii</i>          |
| <i>Conus ebraeus</i>            | EF547576 | <i>Conus ebraeus</i>            | correct   | correct   | correct   | correct   | correct   | correct   | <i>Conus chaldaeus</i>         |
| <i>Conus ebraeus</i>            | EF547575 | <i>Conus ebraeus</i>            | correct   | correct   | correct   | correct   | correct   | correct   | <i>Conus chaldaeus</i>         |
| <i>Conus ebraeus</i>            | EF547574 | <i>Conus ebraeus</i>            | correct   | correct   | correct   | correct   | correct   | correct   | <i>Conus chaldaeus</i>         |
| <i>Conus ebraeus</i>            | EF547573 | <i>Conus ebraeus</i>            | correct   | correct   | correct   | correct   | correct   | correct   | <i>Conus chaldaeus</i>         |
| <i>Conus ebraeus</i>            | EF547572 | <i>Conus ebraeus</i>            | correct   | correct   | correct   | correct   | correct   | correct   | <i>Conus chaldaeus</i>         |
| <i>Conus ebraeus</i>            | EF547571 | <i>Conus ebraeus</i>            | no id     | correct   | correct   | no id     | correct   | correct   | <i>Conus chaldaeus</i>         |
| <i>Conus ebraeus</i>            | EF547570 | <i>Conus ebraeus</i>            | correct   | correct   | correct   | correct   | correct   | correct   | <i>Conus chaldaeus</i>         |
| <i>Conus ebraeus</i>            | EF547569 | <i>Conus ebraeus</i>            | correct   | correct   | correct   | correct   | correct   | correct   | <i>Conus chaldaeus</i>         |
| <i>Conus ebraeus</i>            | EF547568 | <i>Conus ebraeus</i>            | correct   | correct   | correct   | correct   | correct   | correct   | <i>Conus chaldaeus</i>         |
| <i>Conus ebraeus</i>            | EF547567 | <i>Conus ebraeus</i>            | correct   | correct   | correct   | correct   | correct   | correct   | <i>Conus chaldaeus</i>         |
| <i>Conus ebraeus</i>            | EF547566 | <i>Conus ebraeus</i>            | correct   | correct   | correct   | correct   | correct   | correct   | <i>Conus chaldaeus</i>         |
| <i>Conus ebraeus</i>            | EF547565 | <i>Conus ebraeus</i>            | correct   | correct   | correct   | correct   | correct   | correct   | <i>Conus chaldaeus</i>         |
| <i>Conus ebraeus</i>            | EF547564 | <i>Conus ebraeus</i>            | correct   | correct   | correct   | correct   | correct   | correct   | <i>Conus chaldaeus</i>         |
| <i>Conus ebraeus</i>            | EF547563 | <i>Conus ebraeus</i>            | correct   | correct   | correct   | correct   | correct   | correct   | <i>Conus chaldaeus</i>         |

|                             |          |                             |           |           |           |           |           |           |           |                                     |
|-----------------------------|----------|-----------------------------|-----------|-----------|-----------|-----------|-----------|-----------|-----------|-------------------------------------|
| <i>Conus ebraeus</i>        | EF547562 | <i>Conus ebraeus</i>        | correct   | correct   | correct   | correct   | correct   | correct   | correct   | <i>Conus chaldaeus</i>              |
| <i>Conus ebraeus</i>        | EF547561 | <i>Conus ebraeus</i>        | correct   | correct   | correct   | correct   | correct   | correct   | correct   | <i>Conus chaldaeus</i>              |
| <i>Conus ebraeus</i>        | EF547560 | <i>Conus ebraeus</i>        | correct   | correct   | correct   | correct   | correct   | correct   | correct   | <i>Conus chaldaeus</i>              |
| <i>Conus ebraeus</i>        | EF547559 | <i>Conus ebraeus</i>        | correct   | correct   | correct   | correct   | correct   | correct   | correct   | <i>Conus chaldaeus</i>              |
| <i>Conus judaeus</i>        | EF108266 | <i>Conus ebraeus</i>        | no id     | no id     | no id     | no id     | no id     | no id     | no id     | <i>Conus coronatus</i>              |
| <i>Conus quercinus</i>      | HQ834087 | <i>Conus lividus</i>        | no id     | no id     | no id     | no id     | no id     | no id     | no id     | <i>Conus sp.</i>                    |
| <i>Conus lividus</i>        | HQ852576 | <i>Conus lividus</i>        | ambiguous | ambiguous | ambiguous | ambiguous | ambiguous | ambiguous | ambiguous | <i>Conus sp.</i>                    |
| <i>Conus lividus</i>        | HQ852577 | <i>Conus lividus</i>        | ambiguous | ambiguous | ambiguous | ambiguous | ambiguous | ambiguous | ambiguous | <i>Conus sp.</i>                    |
| <i>Conus lividus</i>        | HQ852575 | <i>Conus lividus</i>        | no id     | ambiguous | ambiguous | no id     | ambiguous | ambiguous | ambiguous | <i>Conus sp.</i>                    |
| <i>Conus sanguinolentus</i> | HQ834090 | <i>Conus lividus</i>        | incorrect | incorrect | incorrect | incorrect | incorrect | incorrect | incorrect | <i>Conus sp.</i>                    |
| <i>Conus sanguinolentus</i> | HQ852532 | <i>Conus sanguinolentus</i> | correct   | correct   | correct   | correct   | correct   | correct   | correct   | <i>Conus diadema</i>                |
| <i>Conus sanguinolentus</i> | HQ852530 | <i>Conus sanguinolentus</i> | correct   | correct   | correct   | correct   | correct   | correct   | correct   | <i>Conus diadema</i>                |
| <i>Conus sanguinolentus</i> | HQ852528 | <i>Conus sanguinolentus</i> | correct   | correct   | correct   | correct   | correct   | correct   | correct   | <i>Conus diadema</i>                |
| <i>Conus sanguinolentus</i> | HQ852526 | <i>Conus sanguinolentus</i> | correct   | correct   | correct   | correct   | correct   | correct   | correct   | <i>Conus diadema</i>                |
| <i>Conus sanguinolentus</i> | HQ852524 | <i>Conus sanguinolentus</i> | correct   | correct   | correct   | correct   | correct   | correct   | correct   | <i>Conus diadema</i>                |
| <i>Conus sanguinolentus</i> | HQ852522 | <i>Conus sanguinolentus</i> | correct   | correct   | correct   | correct   | correct   | correct   | correct   | <i>Conus diadema</i>                |
| <i>Conus sanguinolentus</i> | HQ852520 | <i>Conus sanguinolentus</i> | correct   | correct   | correct   | correct   | correct   | correct   | correct   | <i>Conus diadema</i>                |
| <i>Conus sanguinolentus</i> | HQ852533 | <i>Conus sanguinolentus</i> | correct   | correct   | correct   | correct   | correct   | correct   | correct   | <i>Conus diadema</i>                |
| <i>Conus sanguinolentus</i> | HQ852529 | <i>Conus sanguinolentus</i> | correct   | correct   | correct   | correct   | correct   | correct   | correct   | <i>Conus diadema</i>                |
| <i>Conus sanguinolentus</i> | HQ852531 | <i>Conus sanguinolentus</i> | correct   | correct   | correct   | correct   | correct   | correct   | correct   | <i>Conus diadema</i>                |
| <i>Conus sanguinolentus</i> | HQ852527 | <i>Conus sanguinolentus</i> | correct   | correct   | correct   | correct   | correct   | correct   | correct   | <i>Conus diadema</i>                |
| <i>Conus sanguinolentus</i> | HQ852525 | <i>Conus sanguinolentus</i> | correct   | correct   | correct   | correct   | correct   | correct   | correct   | <i>Conus diadema</i>                |
| <i>Conus sanguinolentus</i> | HQ852523 | <i>Conus sanguinolentus</i> | correct   | correct   | correct   | correct   | correct   | correct   | correct   | <i>Conus diadema</i>                |
| <i>Conus sanguinolentus</i> | HQ852521 | <i>Conus sanguinolentus</i> | correct   | correct   | correct   | correct   | correct   | correct   | correct   | <i>Conus diadema</i>                |
| <i>Conus textile</i>        | HQ834089 | <i>Euplica scripta</i>      | no id     | no id     | no id     | no id     | no id     | no id     | no id     | <i>Conus textile archiepiscopus</i> |
| <i>Corbicula fluminea</i>   | KC211267 | <i>Corbicula fluminea</i>   | ambiguous | ambiguous | ambiguous | ambiguous | ambiguous | ambiguous | ambiguous | <i>Corbicula sp.</i>                |
| <i>Corbicula fluminea</i>   | KC211281 | <i>Corbicula fluminea</i>   | ambiguous | ambiguous | ambiguous | ambiguous | ambiguous | ambiguous | ambiguous | <i>Corbicula sp.</i>                |
| <i>Corbicula fluminea</i>   | KC211282 | <i>Corbicula fluminea</i>   | ambiguous | ambiguous | ambiguous | ambiguous | ambiguous | ambiguous | ambiguous | <i>Corbicula sp.</i>                |
| <i>Corbicula fluminea</i>   | KC211283 | <i>Corbicula fluminea</i>   | ambiguous | ambiguous | ambiguous | ambiguous | ambiguous | ambiguous | ambiguous | <i>Corbicula sp.</i>                |
| <i>Corbicula fluminea</i>   | KC211285 | <i>Corbicula fluminea</i>   | ambiguous | ambiguous | ambiguous | ambiguous | ambiguous | ambiguous | ambiguous | <i>Corbicula sp.</i>                |
| <i>Corbicula fluminea</i>   | KC211286 | <i>Corbicula fluminea</i>   | ambiguous | ambiguous | ambiguous | ambiguous | ambiguous | ambiguous | ambiguous | <i>Corbicula sp.</i>                |







|                               |          |                               |         |         |         |         |         |         |                               |
|-------------------------------|----------|-------------------------------|---------|---------|---------|---------|---------|---------|-------------------------------|
| <i>Corbula amurensis</i>      | KJ028752 | <i>Corbula amurensis</i>      | correct | correct | correct | correct | correct | correct | <i>Potamocorbula sp.</i>      |
| <i>Corbula amurensis</i>      | KJ028753 | <i>Corbula amurensis</i>      | correct | correct | correct | correct | correct | correct | <i>Potamocorbula sp.</i>      |
| <i>Corbula amurensis</i>      | KJ028754 | <i>Corbula amurensis</i>      | correct | correct | correct | correct | correct | correct | <i>Potamocorbula sp.</i>      |
| <i>Corbula amurensis</i>      | KJ028755 | <i>Corbula amurensis</i>      | correct | correct | correct | correct | correct | correct | <i>Potamocorbula sp.</i>      |
| <i>Corbula amurensis</i>      | KJ028756 | <i>Corbula amurensis</i>      | correct | correct | correct | correct | correct | correct | <i>Potamocorbula sp.</i>      |
| <i>Corbula amurensis</i>      | KJ028757 | <i>Corbula amurensis</i>      | correct | correct | correct | correct | correct | correct | <i>Potamocorbula sp.</i>      |
| <i>Corbula erythrodon</i>     | KJ125419 | <i>Pholas orientalis</i>      | correct | correct | correct | correct | correct | correct | <i>Corbula tunicata</i>       |
| <i>Costacallista erycina</i>  | HQ703031 | <i>Costacallista erycina</i>  | correct | correct | correct | correct | correct | correct | <i>Costacallista lilacina</i> |
| <i>Costacallista erycina</i>  | HQ703032 | <i>Costacallista erycina</i>  | correct | correct | correct | correct | correct | correct | <i>Costacallista lilacina</i> |
| <i>Costacallista erycina</i>  | HQ703033 | <i>Costacallista erycina</i>  | correct | correct | correct | correct | correct | correct | <i>Costacallista lilacina</i> |
| <i>Costacallista erycina</i>  | HQ703034 | <i>Costacallista erycina</i>  | correct | correct | correct | correct | correct | correct | <i>Costacallista lilacina</i> |
| <i>Costacallista erycina</i>  | JN898943 | <i>Costacallista erycina</i>  | correct | correct | correct | correct | correct | correct | <i>Costacallista lilacina</i> |
| <i>Costacallista erycina</i>  | HM124570 | <i>Costacallista erycina</i>  | correct | correct | correct | correct | correct | correct | <i>Costacallista lilacina</i> |
| <i>Costacallista erycina</i>  | EU117993 | <i>Costacallista erycina</i>  | correct | correct | correct | correct | correct | correct | <i>Costacallista lilacina</i> |
| <i>Crassostrea angulata</i>   | HQ661008 | <i>Crassostrea angulata</i>   | correct | correct | correct | correct | correct | correct | <i>Crassostrea gigas</i>      |
| <i>Crassostrea angulata</i>   | HQ661009 | <i>Crassostrea angulata</i>   | correct | correct | correct | correct | correct | correct | <i>Crassostrea gigas</i>      |
| <i>Crassostrea angulata</i>   | EU672832 | <i>Crassostrea angulata</i>   | correct | correct | correct | correct | correct | correct | <i>Crassostrea gigas</i>      |
| <i>Crassostrea angulata</i>   | AB904879 | <i>Crassostrea angulata</i>   | correct | correct | correct | correct | correct | correct | <i>Crassostrea gigas</i>      |
| <i>Crassostrea angulata</i>   | AB904880 | <i>Crassostrea angulata</i>   | correct | correct | correct | correct | correct | correct | <i>Crassostrea gigas</i>      |
| <i>Crassostrea angulata</i>   | AB904881 | <i>Crassostrea angulata</i>   | correct | correct | correct | correct | correct | correct | <i>Crassostrea gigas</i>      |
| <i>Crassostrea angulata</i>   | AB904882 | <i>Crassostrea angulata</i>   | correct | correct | correct | correct | correct | correct | <i>Crassostrea gigas</i>      |
| <i>Crassostrea angulata</i>   | AB904883 | <i>Crassostrea angulata</i>   | correct | correct | correct | correct | correct | correct | <i>Crassostrea gigas</i>      |
| <i>Crassostrea angulata</i>   | AB904885 | <i>Crassostrea angulata</i>   | correct | correct | correct | correct | correct | correct | <i>Crassostrea gigas</i>      |
| <i>Crassostrea angulata</i>   | AB904886 | <i>Crassostrea angulata</i>   | correct | correct | correct | correct | correct | correct | <i>Crassostrea gigas</i>      |
| <i>Crassostrea angulata</i>   | AB904887 | <i>Crassostrea angulata</i>   | no id   | correct | correct | no id   | correct | correct | <i>Crassostrea gigas</i>      |
| <i>Crassostrea angulata</i>   | AB904888 | <i>Crassostrea angulata</i>   | no id   | correct | correct | no id   | correct | correct | <i>Crassostrea gigas</i>      |
| <i>Crassostrea angulata</i>   | AB904890 | <i>Crassostrea angulata</i>   | correct | correct | correct | correct | correct | correct | <i>Crassostrea gigas</i>      |
| <i>Crassostrea ariakensis</i> | HQ661020 | <i>Crassostrea ariakensis</i> | no id   | correct | correct | no id   | correct | correct | <i>Crassostrea belcheri</i>   |
| <i>Crassostrea ariakensis</i> | HQ661021 | <i>Crassostrea ariakensis</i> | correct | correct | correct | correct | correct | correct | <i>Crassostrea belcheri</i>   |
| <i>Crassostrea ariakensis</i> | EU672835 | <i>Crassostrea ariakensis</i> | correct | correct | correct | correct | correct | correct | <i>Crassostrea belcheri</i>   |
| <i>Crassostrea gigas</i>      | HQ661002 | <i>Crassostrea gigas</i>      | correct | correct | correct | correct | correct | correct | <i>Crassostrea angulata</i>   |





|                             |          |                             |           |           |           |           |           |           |                               |
|-----------------------------|----------|-----------------------------|-----------|-----------|-----------|-----------|-----------|-----------|-------------------------------|
| <i>Cultellus attenuatus</i> | JN860001 | <i>Cultellus attenuatus</i> | correct   | correct   | correct   | correct   | correct   | correct   | <i>Sinonovacula rivularis</i> |
| <i>Cuvierina pacifica</i>   | KP292770 | <i>Cuvierina pacifica</i>   | no id     | correct   | correct   | no id     | correct   | correct   | <i>Cuvierina pacifica</i>     |
| <i>Cuvierina pacifica</i>   | KP292769 | <i>Cuvierina pacifica</i>   | no id     | no id     | correct   | no id     | no id     | correct   | <i>Cuvierina pacifica</i>     |
| <i>Cuvierina pacifica</i>   | KP292768 | <i>Cuvierina pacifica</i>   | no id     | correct   | correct   | no id     | correct   | correct   | <i>Cuvierina pacifica</i>     |
| <i>Cuvierina pacifica</i>   | KP292767 | <i>Cuvierina pacifica</i>   | no id     | correct   | correct   | no id     | correct   | correct   | <i>Cuvierina pacifica</i>     |
| <i>Cuvierina pacifica</i>   | KP292766 | <i>Cuvierina pacifica</i>   | no id     | correct   | correct   | no id     | correct   | correct   | <i>Cuvierina pacifica</i>     |
| <i>Cyclina sinensis</i>     | HQ703115 | <i>Cyclina sinensis</i>     | correct   | correct   | correct   | correct   | correct   | correct   | <i>Chamelea gallina</i>       |
| <i>Cyclina sinensis</i>     | HQ703116 | <i>Cyclina sinensis</i>     | correct   | correct   | correct   | correct   | correct   | correct   | <i>Chamelea gallina</i>       |
| <i>Cyclina sinensis</i>     | HQ703117 | <i>Cyclina sinensis</i>     | correct   | correct   | correct   | correct   | correct   | correct   | <i>Chamelea gallina</i>       |
| <i>Cyclina sinensis</i>     | HQ703118 | <i>Cyclina sinensis</i>     | correct   | correct   | correct   | correct   | correct   | correct   | <i>Chamelea gallina</i>       |
| <i>Cyclina sinensis</i>     | HQ703119 | <i>Cyclina sinensis</i>     | correct   | correct   | correct   | correct   | correct   | correct   | <i>Chamelea gallina</i>       |
| <i>Cyclina sinensis</i>     | HQ703120 | <i>Cyclina sinensis</i>     | correct   | correct   | correct   | correct   | correct   | correct   | <i>Chamelea gallina</i>       |
| <i>Cyclina sinensis</i>     | HQ703121 | <i>Cyclina sinensis</i>     | correct   | correct   | correct   | correct   | correct   | correct   | <i>Chamelea gallina</i>       |
| <i>Cyclina sinensis</i>     | HQ703122 | <i>Cyclina sinensis</i>     | correct   | correct   | correct   | correct   | correct   | correct   | <i>Chamelea gallina</i>       |
| <i>Cyclina sinensis</i>     | HQ703123 | <i>Cyclina sinensis</i>     | correct   | correct   | correct   | correct   | correct   | correct   | <i>Chamelea gallina</i>       |
| <i>Cyclina sinensis</i>     | HQ703124 | <i>Cyclina sinensis</i>     | correct   | correct   | correct   | correct   | correct   | correct   | <i>Chamelea gallina</i>       |
| <i>Cyclina sinensis</i>     | HQ703125 | <i>Cyclina sinensis</i>     | correct   | correct   | correct   | correct   | correct   | correct   | <i>Chamelea gallina</i>       |
| <i>Cyclina sinensis</i>     | HQ703126 | <i>Cyclina sinensis</i>     | correct   | correct   | correct   | correct   | correct   | correct   | <i>Chamelea gallina</i>       |
| <i>Cyclina sinensis</i>     | HQ703127 | <i>Cyclina sinensis</i>     | correct   | correct   | correct   | correct   | correct   | correct   | <i>Chamelea gallina</i>       |
| <i>Cyclina sinensis</i>     | HQ703128 | <i>Cyclina sinensis</i>     | correct   | correct   | correct   | correct   | correct   | correct   | <i>Chamelea gallina</i>       |
| <i>Cyclina sinensis</i>     | HQ703129 | <i>Cyclina sinensis</i>     | correct   | correct   | correct   | correct   | correct   | correct   | <i>Chamelea gallina</i>       |
| <i>Cyclina sinensis</i>     | HQ703130 | <i>Cyclina sinensis</i>     | correct   | correct   | correct   | correct   | correct   | correct   | <i>Chamelea gallina</i>       |
| <i>Cyclina sinensis</i>     | HQ703131 | <i>Cyclina sinensis</i>     | correct   | correct   | correct   | correct   | correct   | correct   | <i>Chamelea gallina</i>       |
| <i>Cyclina sinensis</i>     | HM021149 | <i>Cyclina sinensis</i>     | correct   | correct   | correct   | correct   | correct   | correct   | <i>Chamelea gallina</i>       |
| <i>Cyclina sinensis</i>     | HM021148 | <i>Cyclina sinensis</i>     | correct   | correct   | correct   | correct   | correct   | correct   | <i>Chamelea gallina</i>       |
| <i>Cyclina sinensis</i>     | HM021147 | <i>Cyclina sinensis</i>     | correct   | correct   | correct   | correct   | correct   | correct   | <i>Chamelea gallina</i>       |
| <i>Sunetta concinna</i>     | JN898937 | <i>Meretrix petechialis</i> | no id     | no id     | no id     | no id     | no id     | no id     | <i>Cyclina sinensis</i>       |
| <i>Sunetta menstrualis</i>  | HQ703213 | <i>Sunetta menstrualis</i>  | ambiguous | ambiguous | ambiguous | ambiguous | ambiguous | ambiguous | <i>Chamelea gallina</i>       |
| <i>Sunetta menstrualis</i>  | HQ703214 | <i>Sunetta menstrualis</i>  | correct   | correct   | correct   | correct   | correct   | correct   | <i>Chamelea gallina</i>       |
| <i>Sunetta menstrualis</i>  | HQ703215 | <i>Sunetta menstrualis</i>  | correct   | correct   | correct   | correct   | correct   | correct   | <i>Chamelea gallina</i>       |
| <i>Sunetta menstrualis</i>  | HQ703216 | <i>Sunetta menstrualis</i>  | correct   | correct   | correct   | correct   | correct   | correct   | <i>Chamelea gallina</i>       |

|                              |          |                                    |         |         |         |         |         |         |                              |
|------------------------------|----------|------------------------------------|---------|---------|---------|---------|---------|---------|------------------------------|
| <i>Sunetta menstrualis</i>   | HM124589 | <i>Sunetta menstrualis</i>         | correct | correct | correct | correct | correct | correct | <i>Chamelea gallina</i>      |
| <i>Sunetta menstrualis</i>   | HM124588 | <i>Sunetta menstrualis</i>         | correct | correct | correct | correct | correct | correct | <i>Chamelea gallina</i>      |
| <i>Cymatium cingulatum</i>   | JF693367 | <i>Cymatium cingulatum</i>         | correct | correct | correct | correct | correct | correct | <i>Cymatium labiosum</i>     |
| <i>Cymatium cingulatum</i>   | JF693368 | <i>Cymatium cingulatum</i>         | correct | correct | correct | correct | correct | correct | <i>Cymatium labiosum</i>     |
| <i>Cypraea tigris</i>        | JF693369 | <i>Cypraea tigris</i>              | correct | correct | correct | correct | correct | correct | <i>Cypraea tigris</i>        |
| <i>Cypraea tigris</i>        | JF693370 | <i>Cypraea tigris</i>              | correct | correct | correct | correct | correct | correct | <i>Cypraea tigris</i>        |
| <i>Cypraea vitellus</i>      | JF693371 | <i>Cypraea tigris</i>              | no id   | no id   | no id   | no id   | no id   | no id   | <i>Lyncina propinqua</i>     |
| <i>Decatopecten pilica</i>   | GU120026 | <i>Decatopecten plica</i>          | no id   | correct | correct | no id   | correct | correct |                              |
| <i>Decatopecten pilica</i>   | GU120027 | <i>Decatopecten plica</i>          | correct | correct | correct | correct | correct | correct |                              |
| <i>Decatopecten pilica</i>   | GU120029 | <i>Decatopecten plica</i>          | correct | correct | correct | correct | correct | correct |                              |
| <i>Decatopecten pilica</i>   | GU120030 | <i>Decatopecten plica</i>          | no id   | correct | correct | no id   | correct | correct |                              |
| <i>Didimacar tenebrica</i>   | KU341932 | <i>Didimacar tenebrica</i>         | correct | correct | correct | correct | correct | correct |                              |
| <i>Didimacar tenebrica</i>   | KU341933 | <i>Didimacar tenebrica</i>         | correct | correct | correct | correct | correct | correct |                              |
| <i>Didimacar tenebrica</i>   | KU341934 | <i>Didimacar tenebrica</i>         | correct | correct | correct | correct | correct | correct |                              |
| <i>Didimacar tenebrica</i>   | KU341935 | <i>Didimacar tenebrica</i>         | correct | correct | correct | correct | correct | correct |                              |
| <i>Didimacar tenebrica</i>   | KU341936 | <i>Didimacar tenebrica</i>         | correct | correct | correct | correct | correct | correct |                              |
| <i>Didimacar tenebrica</i>   | HQ258871 | <i>Didimacar tenebrica</i>         | correct | correct | correct | correct | correct | correct |                              |
| <i>Dillwynella vitrea</i>    | AM049336 | <i>Dillwynella vitrea</i>          | no id   | correct | correct | no id   | correct | correct | <i>Dillwynella sp.</i>       |
| <i>Dillwynella vitrea</i>    | EU530143 | <i>Dillwynella vitrea</i>          | no id   | correct | correct | no id   | correct | correct | <i>Dillwynella sp.</i>       |
| <i>Diloma piperinus</i>      | AB505288 | <i>Pseudostomatella decolorata</i> | no id   | no id   | no id   | no id   | no id   | no id   | <i>Diloma constellatus</i>   |
| <i>Diloma radula</i>         | AY858090 | <i>Gonatopsis octopedatus</i>      | no id   | no id   | no id   | no id   | no id   | no id   | <i>Diloma samoensis</i>      |
| <i>Diloma suavis</i>         | AB505281 | <i>Stomatella planulata</i>        | no id   | no id   | no id   | no id   | no id   | no id   | <i>Osilinus punctulatus</i>  |
| <i>Distorsio reticularis</i> | JF693372 | <i>Distorsio reticularis</i>       | correct | correct | correct | correct | correct | correct | <i>Distorsio reticularis</i> |
| <i>Distorsio reticularis</i> | JF693373 | <i>Distorsio reticularis</i>       | correct | correct | correct | correct | correct | correct | <i>Distorsio reticularis</i> |
| <i>Donax dysoni</i>          | JN859978 | <i>Donax dysoni</i>                | correct | correct | correct | correct | correct | correct | <i>Psammotaea sp.</i>        |
| <i>Donax dysoni</i>          | JN859979 | <i>Donax dysoni</i>                | correct | correct | correct | correct | correct | correct | <i>Psammotaea sp.</i>        |
| <i>Donax dysoni</i>          | JN859980 | <i>Donax dysoni</i>                | correct | correct | correct | correct | correct | correct | <i>Psammotaea sp.</i>        |
| <i>Donax dysoni</i>          | JN859981 | <i>Donax dysoni</i>                | correct | correct | correct | correct | correct | correct | <i>Psammotaea sp.</i>        |
| <i>Donax dysoni</i>          | JN859976 | <i>Donax dysoni</i>                | correct | correct | correct | correct | correct | correct | <i>Psammotaea sp.</i>        |
| <i>Donax dysoni</i>          | JN859977 | <i>Donax dysoni</i>                | correct | correct | correct | correct | correct | correct | <i>Psammotaea sp.</i>        |
| <i>Dosinia angulosa</i>      | HQ703148 | <i>Dosinia angulosa</i>            | correct | correct | correct | correct | correct | correct | <i>Dosinia corrugata</i>     |

|                          |          |                          |           |           |           |           |           |           |                                |
|--------------------------|----------|--------------------------|-----------|-----------|-----------|-----------|-----------|-----------|--------------------------------|
| <i>Dosinia angulosa</i>  | HQ703149 | <i>Dosinia angulosa</i>  | correct   | correct   | correct   | correct   | correct   | correct   | <i>Dosinia corrugata</i>       |
| <i>Dosinia angulosa</i>  | HQ703150 | <i>Dosinia angulosa</i>  | correct   | correct   | correct   | correct   | correct   | correct   | <i>Dosinia corrugata</i>       |
| <i>Dosinia angulosa</i>  | HQ703151 | <i>Dosinia angulosa</i>  | no id     | correct   | correct   | no id     | correct   | correct   | <i>Dosinia corrugata</i>       |
| <i>Dosinia biscocta</i>  | HM124577 | <i>Dosinia fibula</i>    | ambiguous | ambiguous | ambiguous | ambiguous | ambiguous | ambiguous | <i>Dosinia troscheli</i>       |
| <i>Dosinia biscocta</i>  | HM124572 | <i>Dosinia fibula</i>    | ambiguous | ambiguous | ambiguous | ambiguous | ambiguous | ambiguous | <i>Dosinia troscheli</i>       |
| <i>Dosinia fibula</i>    | HQ703132 | <i>Dosinia fibula</i>    | correct   | correct   | correct   | correct   | correct   | correct   | <i>Dosinia troscheli</i>       |
| <i>Dosinia fibula</i>    | HQ703133 | <i>Dosinia fibula</i>    | ambiguous | ambiguous | ambiguous | ambiguous | ambiguous | ambiguous | <i>Dosinia troscheli</i>       |
| <i>Dosinia fibula</i>    | HQ703134 | <i>Dosinia fibula</i>    | no id     | ambiguous | ambiguous | no id     | ambiguous | ambiguous | <i>Dosinia troscheli</i>       |
| <i>Dosinia fibula</i>    | HQ703135 | <i>Dosinia fibula</i>    | ambiguous | ambiguous | ambiguous | ambiguous | ambiguous | ambiguous | <i>Dosinia troscheli</i>       |
| <i>Dosinia fibula</i>    | HQ703136 | <i>Dosinia fibula</i>    | ambiguous | ambiguous | ambiguous | ambiguous | ambiguous | ambiguous | <i>Dosinia troscheli</i>       |
| <i>Dosinia corrugata</i> | HQ703141 | <i>Dosinia corrugata</i> | correct   | correct   | correct   | correct   | correct   | ambiguous | <i>Dosinia japonica</i>        |
| <i>Dosinia corrugata</i> | HQ703142 | <i>Dosinia corrugata</i> | correct   | correct   | correct   | correct   | correct   | correct   | <i>Dosinia japonica</i>        |
| <i>Dosinia corrugata</i> | HQ703143 | <i>Dosinia corrugata</i> | correct   | correct   | correct   | correct   | correct   | correct   | <i>Dosinia japonica</i>        |
| <i>Dosinia corrugata</i> | HQ703144 | <i>Dosinia corrugata</i> | correct   | correct   | correct   | correct   | correct   | correct   | <i>Dosinia japonica</i>        |
| <i>Dosinia corrugata</i> | HQ703145 | <i>Dosinia corrugata</i> | correct   | correct   | correct   | correct   | correct   | correct   | <i>Dosinia japonica</i>        |
| <i>Dosinia corrugata</i> | HQ703146 | <i>Dosinia corrugata</i> | correct   | correct   | correct   | correct   | correct   | correct   | <i>Dosinia japonica</i>        |
| <i>Dosinia corrugata</i> | HQ703147 | <i>Dosinia corrugata</i> | no id     | correct   | correct   | no id     | correct   | correct   | <i>Dosinia japonica</i>        |
| <i>Dosinia corrugata</i> | JN898932 | <i>Dosinia corrugata</i> | correct   | correct   | correct   | correct   | correct   | correct   | <i>Dosinia japonica</i>        |
| <i>Dosinia corrugata</i> | HM124573 | <i>Dosinia corrugata</i> | correct   | correct   | correct   | correct   | correct   | correct   | <i>Dosinia japonica</i>        |
| <i>Dosinia japonicum</i> | HQ703137 | <i>Dosinia japonicum</i> | ambiguous | ambiguous | ambiguous | ambiguous | ambiguous | ambiguous | <i>Dosinia troscheli</i>       |
| <i>Dosinia japonicum</i> | HQ703138 | <i>Dosinia japonicum</i> | correct   | correct   | correct   | correct   | correct   | correct   | <i>Dosinia troscheli</i>       |
| <i>Dosinia troscheli</i> | HQ703139 | <i>Dosinia troscheli</i> | correct   | correct   | correct   | correct   | correct   | correct   | <i>Dosinia fibula</i>          |
| <i>Dosinia troscheli</i> | HQ703140 | <i>Dosinia troscheli</i> | correct   | correct   | correct   | correct   | correct   | ambiguous | <i>Dosinia fibula</i>          |
| <i>Drupa albolabris</i>  | HE584499 | <i>Drupa albolabris</i>  | correct   | correct   | correct   | correct   | correct   | correct   | <i>Muricidae sp.</i>           |
| <i>Drupa albolabris</i>  | HE584498 | <i>Drupa albolabris</i>  | correct   | correct   | correct   | correct   | correct   | correct   | <i>Muricidae sp.</i>           |
| <i>Drupa grossularia</i> | HE584488 | <i>Cerithidea ornate</i> | no id     | no id     | no id     | no id     | no id     | no id     | <i>Drupa grossularia</i>       |
| <i>Drupa rubusidaeus</i> | HE584527 | <i>Drupa rubusidaeus</i> | correct   | correct   | correct   | correct   | correct   | correct   | <i>Drupa speciosa</i>          |
| <i>Drupa rubusidaeus</i> | HE584526 | <i>Drupa rubusidaeus</i> | correct   | correct   | correct   | correct   | correct   | correct   | <i>Drupa speciosa</i>          |
| <i>Drupella cornus</i>   | FR853820 | <i>Drupella eburnea</i>  | no id     | no id     | no id     | no id     | no id     | no id     | <i>Drupella sp.</i>            |
| <i>Drupella eburnea</i>  | FR853828 | <i>Drupella cornus</i>   | no id     | no id     | no id     | no id     | no id     | no id     | <i>Drupella sp.</i>            |
| <i>Drupella fragum</i>   | FR853892 | <i>Drupella fragum</i>   | correct   | correct   | correct   | correct   | correct   | correct   | <i>Ergalatax margariticola</i> |











|                             |          |                             |           |           |           |           |           |           |                             |
|-----------------------------|----------|-----------------------------|-----------|-----------|-----------|-----------|-----------|-----------|-----------------------------|
| <i>Elysia atroviridis</i>   | AB758913 | <i>Elysia atroviridis</i>   | ambiguous | ambiguous | ambiguous | ambiguous | ambiguous | ambiguous | <i>Elysia cf. tomentosa</i> |
| <i>Elysia atroviridis</i>   | AB758912 | <i>Elysia atroviridis</i>   | ambiguous | ambiguous | ambiguous | ambiguous | ambiguous | ambiguous | <i>Elysia cf. tomentosa</i> |
| <i>Elysia atroviridis</i>   | AB758911 | <i>Elysia atroviridis</i>   | ambiguous | ambiguous | ambiguous | ambiguous | ambiguous | ambiguous | <i>Elysia cf. tomentosa</i> |
| <i>Elysia atroviridis</i>   | AB758910 | <i>Elysia atroviridis</i>   | ambiguous | ambiguous | ambiguous | ambiguous | ambiguous | ambiguous | <i>Elysia cf. tomentosa</i> |
| <i>Elysia atroviridis</i>   | AB758909 | <i>Elysia atroviridis</i>   | ambiguous | ambiguous | ambiguous | ambiguous | ambiguous | ambiguous | <i>Elysia cf. tomentosa</i> |
| <i>Elysia atroviridis</i>   | AB758908 | <i>Elysia atroviridis</i>   | correct   | correct   | correct   | correct   | ambiguous | ambiguous | <i>Elysia cf. tomentosa</i> |
| <i>Elysia atroviridis</i>   | AB758907 | <i>Elysia atroviridis</i>   | ambiguous | ambiguous | ambiguous | ambiguous | ambiguous | ambiguous | <i>Elysia cf. tomentosa</i> |
| <i>Elysia atroviridis</i>   | AB758906 | <i>Elysia atroviridis</i>   | ambiguous | ambiguous | ambiguous | ambiguous | ambiguous | ambiguous | <i>Elysia cf. tomentosa</i> |
| <i>Elysia atroviridis</i>   | AB758905 | <i>Elysia atroviridis</i>   | ambiguous | ambiguous | ambiguous | ambiguous | ambiguous | ambiguous | <i>Elysia cf. tomentosa</i> |
| <i>Elysia atroviridis</i>   | AB758949 | <i>Elysia atroviridis</i>   | ambiguous | ambiguous | ambiguous | ambiguous | ambiguous | ambiguous | <i>Elysia cf. tomentosa</i> |
| <i>Elysia atroviridis</i>   | AB758948 | <i>Elysia atroviridis</i>   | ambiguous | ambiguous | ambiguous | ambiguous | ambiguous | ambiguous | <i>Elysia cf. tomentosa</i> |
| <i>Elysia atroviridis</i>   | AB758947 | <i>Elysia atroviridis</i>   | ambiguous | ambiguous | ambiguous | ambiguous | ambiguous | ambiguous | <i>Elysia cf. tomentosa</i> |
| <i>Elysia atroviridis</i>   | AB758946 | <i>Elysia atroviridis</i>   | ambiguous | ambiguous | ambiguous | ambiguous | ambiguous | ambiguous | <i>Elysia cf. tomentosa</i> |
| <i>Elysia atroviridis</i>   | AB758945 | <i>Elysia atroviridis</i>   | no id     | ambiguous | ambiguous | no id     | ambiguous | ambiguous | <i>Elysia cf. tomentosa</i> |
| <i>Elysia atroviridis</i>   | AB758944 | <i>Elysia atroviridis</i>   | ambiguous | ambiguous | ambiguous | ambiguous | ambiguous | ambiguous | <i>Elysia cf. tomentosa</i> |
| <i>Elysia atroviridis</i>   | AB758943 | <i>Elysia atroviridis</i>   | ambiguous | ambiguous | ambiguous | ambiguous | ambiguous | ambiguous | <i>Elysia cf. tomentosa</i> |
| <i>Elysia atroviridis</i>   | KC573760 | <i>Elysia atroviridis</i>   | ambiguous | ambiguous | ambiguous | ambiguous | ambiguous | ambiguous | <i>Elysia cf. tomentosa</i> |
| <i>Elysia setoensis</i>     | KC573761 | <i>Elysia atroviridis</i>   | incorrect | incorrect | incorrect | incorrect | incorrect | incorrect | <i>Elysia cf. tomentosa</i> |
| <i>Elysia ornata</i>        | AB758967 | <i>Elysia ornata</i>        | correct   | correct   | correct   | correct   | correct   | ambiguous | <i>Elysia cf. marginata</i> |
| <i>Elysia ornata</i>        | AB758966 | <i>Elysia ornata</i>        | correct   | correct   | correct   | correct   | correct   | ambiguous | <i>Elysia cf. marginata</i> |
| <i>Elysia ornata</i>        | AB758964 | <i>Elysia ornata</i>        | no id     | no id     | correct   | no id     | no id     | correct   | <i>Elysia ornata</i>        |
| <i>Elysia ornata</i>        | AB758965 | <i>Elysia ornata</i>        | correct   | correct   | correct   | correct   | correct   | ambiguous | <i>Elysia cf. marginata</i> |
| <i>Elysia ornata</i>        | AB758963 | <i>Elysia ornata</i>        | correct   | correct   | correct   | correct   | correct   | ambiguous | <i>Elysia cf. marginata</i> |
| <i>Elysia ornata</i>        | AB758962 | <i>Elysia ornata</i>        | correct   | correct   | correct   | correct   | correct   | ambiguous | <i>Elysia cf. marginata</i> |
| <i>Elysia pusilla</i>       | AB758959 | <i>Elysia pusilla</i>       | correct   | correct   | correct   | correct   | correct   | correct   | <i>Elysia pusilla</i>       |
| <i>Elysia pusilla</i>       | AB758958 | <i>Elysia pusilla</i>       | correct   | correct   | correct   | correct   | correct   | correct   | <i>Elysia pusilla</i>       |
| <i>Elysia pusilla</i>       | AB758957 | <i>Elysia pusilla</i>       | correct   | correct   | correct   | correct   | correct   | correct   | <i>Elysia pusilla</i>       |
| <i>Elysia rufescens</i>     | AB758961 | <i>Elysia rufescens</i>     | no id     | correct   | correct   | no id     | correct   | ambiguous | <i>Elysia ornata</i>        |
| <i>Elysia rufescens</i>     | AB758960 | <i>Elysia rufescens</i>     | no id     | correct   | correct   | no id     | correct   | correct   | <i>Elysia ornata</i>        |
| <i>Elysia trisinuata</i>    | AB758951 | <i>Elysia atroviridis</i>   | no id     | no id     | no id     | no id     | no id     | no id     | <i>Elysia marcusii</i>      |
| <i>Emarginula foveolata</i> | AM049333 | <i>Emarginula foveolata</i> | correct   | correct   | correct   | correct   | correct   | correct   | <i>Lineus ruber</i>         |

|                             |          |                             |         |         |           |         |         |           |                                  |
|-----------------------------|----------|-----------------------------|---------|---------|-----------|---------|---------|-----------|----------------------------------|
| <i>Emarginula foveolata</i> | AB238593 | <i>Emarginula foveolata</i> | correct | correct | correct   | correct | correct | correct   | <i>Lineus ruber</i>              |
| <i>Emarginula variegata</i> | AB365213 | <i>Emarginula variegata</i> | correct | correct | correct   | correct | correct | correct   | <i>Emarginula variegata</i>      |
| <i>Emarginula variegata</i> | AB238594 | <i>Emarginula variegata</i> | correct | correct | correct   | correct | correct | correct   | <i>Emarginula variegata</i>      |
| <i>Erronea erronea</i>      | JF693396 | <i>Erronea erronea</i>      | no id   | no id   | no id     | no id   | no id   | no id     | <i>Erronea caurica</i>           |
| <i>Erronea erronea</i>      | JF693397 | <i>Erronea erronea</i>      | no id   | no id   | no id     | no id   | no id   | no id     | <i>Erronea erronea</i>           |
| <i>Ethaliella floccata</i>  | AB505304 | <i>Ethaliella floccata</i>  | correct | correct | correct   | correct | correct | correct   | <i>Ethaliella floccata</i>       |
| <i>Ethaliella floccata</i>  | AB505305 | <i>Ethaliella floccata</i>  | correct | correct | correct   | correct | correct | correct   | <i>Ethaliella floccata</i>       |
| <i>Ethaliella floccata</i>  | EU530137 | <i>Ethaliella floccata</i>  | correct | correct | correct   | correct | correct | correct   | <i>Ethaliella floccata</i>       |
| <i>Ethminolia stearnsii</i> | AB505306 | <i>Ethminolia stearnsii</i> | correct | correct | correct   | correct | correct | correct   | <i>Margarella antipoda rosea</i> |
| <i>Ethminolia stearnsii</i> | AB505307 | <i>Ethminolia stearnsii</i> | correct | correct | correct   | correct | correct | correct   | <i>Margarella antipoda rosea</i> |
| <i>Euplica scripta</i>      | HQ834054 | <i>Euplica scripta</i>      | correct | correct | correct   | correct | correct | correct   | <i>Amphissa versicolor</i>       |
| <i>Euplica scripta</i>      | JN052987 | <i>Euplica scripta</i>      | correct | correct | correct   | correct | correct | correct   | <i>Amphissa versicolor</i>       |
| <i>Euplica scripta</i>      | JN052986 | <i>Euplica scripta</i>      | correct | correct | correct   | correct | correct | correct   | <i>Amphissa versicolor</i>       |
| <i>Euplica scripta</i>      | JN052985 | <i>Conus aristophanes</i>   | no id   | no id   | incorrect | no id   | no id   | incorrect | <i>Conus abbreviatus</i>         |
| <i>Conus aristophanes</i>   | HQ834101 | <i>Euplica scripta</i>      | no id   | no id   | incorrect | no id   | no id   | incorrect | <i>Conus abbreviatus</i>         |
| <i>Euprymna berryi</i>      | HQ846099 | <i>Euprymna berryi</i>      | correct | correct | correct   | correct | correct | correct   | <i>Euprymna hyllebergi</i>       |
| <i>Euprymna berryi</i>      | HQ846100 | <i>Euprymna berryi</i>      | correct | correct | correct   | correct | correct | correct   | <i>Euprymna hyllebergi</i>       |
| <i>Euprymna berryi</i>      | HQ846101 | <i>Euprymna berryi</i>      | correct | correct | correct   | correct | correct | correct   | <i>Euprymna hyllebergi</i>       |
| <i>Euprymna berryi</i>      | HQ846102 | <i>Euprymna berryi</i>      | correct | correct | correct   | correct | correct | correct   | <i>Euprymna hyllebergi</i>       |
| <i>Euprymna morsei</i>      | HQ846103 | <i>Euprymna morsei</i>      | correct | correct | correct   | correct | correct | correct   | <i>Euprymna hyllebergi</i>       |
| <i>Euprymna morsei</i>      | HQ846104 | <i>Euprymna morsei</i>      | correct | correct | correct   | correct | correct | correct   | <i>Euprymna hyllebergi</i>       |
| <i>Euprymna morsei</i>      | HQ846105 | <i>Euprymna morsei</i>      | correct | correct | correct   | correct | correct | correct   | <i>Euprymna hyllebergi</i>       |
| <i>Eurytrochus cognatus</i> | AB505299 | <i>Eurytrochus cognatus</i> | correct | correct | correct   | correct | correct | correct   | <i>Notogibbula preissiana</i>    |
| <i>Eurytrochus cognatus</i> | EU530133 | <i>Eurytrochus cognatus</i> | correct | correct | correct   | correct | correct | correct   | <i>Notogibbula preissiana</i>    |
| <i>Ficus ficus</i>          | JF693374 | <i>Ficus ficus</i>          | no id   | correct | correct   | no id   | correct | ambiguous | <i>Ficidae sp.</i>               |
| <i>Ficus ficus</i>          | JF693375 | <i>Ficus ficus</i>          | no id   | correct | correct   | no id   | correct | ambiguous | <i>Ficidae sp.</i>               |
| <i>Ficus ficus</i>          | JF693376 | <i>Ficus ficus</i>          | no id   | correct | correct   | no id   | correct | ambiguous | <i>Ficidae sp.</i>               |
| <i>Ficus gracilis</i>       | JF693380 | <i>Ficus gracilis</i>       | correct | correct | correct   | correct | correct | correct   | <i>Ficidae sp.</i>               |
| <i>Ficus gracilis</i>       | JF693381 | <i>Ficus gracilis</i>       | correct | correct | correct   | correct | correct | correct   | <i>Ficidae sp.</i>               |
| <i>Ficus gracilis</i>       | JF693382 | <i>Ficus gracilis</i>       | correct | correct | correct   | correct | correct | correct   | <i>Ficidae sp.</i>               |
| <i>Ficus variegata</i>      | JF693377 | <i>Ficus variegata</i>      | correct | correct | correct   | correct | correct | ambiguous | <i>Clione antarctica</i>         |

|                              |          |                              |         |           |           |         |           |           |                            |
|------------------------------|----------|------------------------------|---------|-----------|-----------|---------|-----------|-----------|----------------------------|
| <i>Ficus variegata</i>       | JF693378 | <i>Ficus variegata</i>       | correct | correct   | correct   | correct | correct   | ambiguous | <i>Clione antarctica</i>   |
| <i>Ficus variegata</i>       | JF693379 | <i>Ficus variegata</i>       | correct | correct   | correct   | correct | correct   | ambiguous | <i>Clione antarctica</i>   |
| <i>Fusinus forceps</i>       | HM180580 | <i>Fusinus forceps</i>       | correct | correct   | correct   | correct | ambiguous | ambiguous | <i>Fusinus longicaudus</i> |
| <i>Fusinus forceps</i>       | HM180581 | <i>Fusinus forceps</i>       | correct | correct   | correct   | correct | ambiguous | ambiguous | <i>Fusinus longicaudus</i> |
| <i>Fusinus forceps</i>       | HM180582 | <i>Fusinus longicaudus</i>   | no id   | incorrect | incorrect | no id   | incorrect | ambiguous | <i>Fusinus longicaudus</i> |
| <i>Fusinus forceps</i>       | HM180583 | <i>Fusinus forceps</i>       | correct | correct   | correct   | correct | ambiguous | ambiguous | <i>Fusinus longicaudus</i> |
| <i>Fusinus forceps</i>       | HM180584 | <i>Fusinus forceps</i>       | correct | correct   | correct   | correct | ambiguous | ambiguous | <i>Fusinus longicaudus</i> |
| <i>Fusinus longicaudus</i>   | HM180585 | <i>Fusinus forceps</i>       | no id   | incorrect | incorrect | no id   | incorrect | incorrect | <i>Fusinus longicaudus</i> |
| <i>Fusinus longicaudus</i>   | HQ834100 | <i>Fusinus longicaudus</i>   | correct | correct   | correct   | correct | correct   | correct   | <i>Fusinus forceps</i>     |
| <i>Fusinus longicaudus</i>   | HQ834099 | <i>Fusinus longicaudus</i>   | correct | correct   | correct   | correct | correct   | correct   | <i>Fusinus forceps</i>     |
| <i>Gabrielona pisinna</i>    | AM049356 | <i>Gabrielona pisinna</i>    | correct | correct   | correct   | correct | correct   | correct   | <i>Turbo radiatus</i>      |
| <i>Gabrielona pisinna</i>    | AM049357 | <i>Gabrielona pisinna</i>    | correct | correct   | correct   | correct | correct   | correct   | <i>Turbo radiatus</i>      |
| <i>Gafrarium dispar</i>      | HQ703086 | <i>Gafrarium dispar</i>      | correct | correct   | correct   | correct | correct   | correct   | <i>Gafrarium tumidum</i>   |
| <i>Gafrarium dispar</i>      | HQ703087 | <i>Gafrarium dispar</i>      | correct | correct   | correct   | correct | correct   | correct   | <i>Gafrarium tumidum</i>   |
| <i>Gafrarium dispar</i>      | HQ703088 | <i>Gafrarium dispar</i>      | correct | correct   | correct   | correct | correct   | correct   | <i>Gafrarium tumidum</i>   |
| <i>Gafrarium dispar</i>      | HQ703089 | <i>Gafrarium dispar</i>      | correct | correct   | correct   | correct | correct   | correct   | <i>Gafrarium tumidum</i>   |
| <i>Gafrarium dispar</i>      | HQ703090 | <i>Gafrarium dispar</i>      | correct | correct   | correct   | correct | correct   | correct   | <i>Gafrarium tumidum</i>   |
| <i>Gafrarium dispar</i>      | HQ703091 | <i>Gafrarium dispar</i>      | correct | correct   | correct   | correct | correct   | correct   | <i>Gafrarium tumidum</i>   |
| <i>Gafrarium dispar</i>      | HQ703092 | <i>Gafrarium dispar</i>      | correct | correct   | correct   | correct | correct   | correct   | <i>Gafrarium tumidum</i>   |
| <i>Gafrarium dispar</i>      | HQ703093 | <i>Gafrarium dispar</i>      | correct | correct   | correct   | correct | correct   | correct   | <i>Gafrarium tumidum</i>   |
| <i>Gafrarium dispar</i>      | HQ703094 | <i>Gafrarium dispar</i>      | correct | correct   | correct   | correct | correct   | correct   | <i>Gafrarium dispar</i>    |
| <i>Gafrarium divaricatum</i> | HQ703095 | <i>Gafrarium divaricatum</i> | no id   | no id     | no id     | no id   | no id     | no id     | <i>Gafrarium dispar</i>    |
| <i>Gafrarium divaricatum</i> | HQ703096 | <i>Gafrarium divaricatum</i> | no id   | no id     | correct   | no id   | no id     | correct   | <i>Gafrarium dispar</i>    |
| <i>Gafrarium divaricatum</i> | HQ703097 | <i>Gafrarium divaricatum</i> | correct | correct   | correct   | correct | correct   | correct   | <i>Gafrarium dispar</i>    |
| <i>Gafrarium divaricatum</i> | HQ703098 | <i>Gafrarium divaricatum</i> | correct | correct   | correct   | correct | correct   | correct   | <i>Gafrarium dispar</i>    |
| <i>Gafrarium divaricatum</i> | HQ703099 | <i>Gafrarium divaricatum</i> | correct | correct   | correct   | correct | correct   | correct   | <i>Gafrarium dispar</i>    |
| <i>Gafrarium divaricatum</i> | HQ703100 | <i>Gafrarium divaricatum</i> | correct | correct   | correct   | correct | correct   | correct   | <i>Gafrarium dispar</i>    |
| <i>Gafrarium divaricatum</i> | HQ703101 | <i>Gafrarium divaricatum</i> | correct | correct   | correct   | correct | correct   | correct   | <i>Gafrarium dispar</i>    |
| <i>Gafrarium divaricatum</i> | HQ703102 | <i>Gafrarium divaricatum</i> | correct | correct   | correct   | correct | correct   | correct   | <i>Gafrarium dispar</i>    |
| <i>Gafrarium divaricatum</i> | HQ703103 | <i>Gafrarium divaricatum</i> | correct | correct   | correct   | correct | correct   | correct   | <i>Gafrarium dispar</i>    |
| <i>Gafrarium divaricatum</i> | HQ703104 | <i>Gafrarium divaricatum</i> | correct | correct   | correct   | correct | correct   | correct   | <i>Gafrarium dispar</i>    |

|                               |          |                               |         |         |           |         |         |           |                              |
|-------------------------------|----------|-------------------------------|---------|---------|-----------|---------|---------|-----------|------------------------------|
| <i>Gafrarium divaricatum</i>  | HQ703105 | <i>Gafrarium divaricatum</i>  | correct | correct | correct   | correct | correct | correct   | <i>Gafrarium dispar</i>      |
| <i>Gafrarium divaricatum</i>  | HQ703106 | <i>Gafrarium divaricatum</i>  | correct | correct | correct   | correct | correct | correct   | <i>Gafrarium dispar</i>      |
| <i>Gafrarium pectinatum</i>   | HQ703077 | <i>Gafrarium pectinatum</i>   | correct | correct | correct   | correct | correct | correct   | <i>Gafrarium tumidum</i>     |
| <i>Gafrarium pectinatum</i>   | HQ703078 | <i>Gafrarium pectinatum</i>   | correct | correct | correct   | correct | correct | correct   | <i>Gafrarium tumidum</i>     |
| <i>Gafrarium pectinatum</i>   | HQ703079 | <i>Gafrarium pectinatum</i>   | correct | correct | correct   | correct | correct | correct   | <i>Gafrarium tumidum</i>     |
| <i>Gafrarium pectinatum</i>   | HQ703080 | <i>Gafrarium pectinatum</i>   | correct | correct | correct   | correct | correct | correct   | <i>Gafrarium tumidum</i>     |
| <i>Gafrarium tumidum</i>      | HQ703081 | <i>Gafrarium tumidum</i>      | correct | correct | correct   | correct | correct | correct   | <i>Gafrarium tumidum</i>     |
| <i>Gafrarium tumidum</i>      | HQ703082 | <i>Gafrarium tumidum</i>      | correct | correct | correct   | correct | correct | correct   | <i>Gafrarium tumidum</i>     |
| <i>Gafrarium tumidum</i>      | HQ703083 | <i>Gafrarium tumidum</i>      | correct | correct | correct   | correct | correct | correct   | <i>Gafrarium tumidum</i>     |
| <i>Gafrarium tumidum</i>      | HQ703084 | <i>Gafrarium tumidum</i>      | correct | correct | correct   | correct | correct | correct   | <i>Gafrarium tumidum</i>     |
| <i>Gafrarium tumidum</i>      | HQ703085 | <i>Gafrarium tumidum</i>      | correct | correct | correct   | correct | correct | correct   | <i>Gafrarium tumidum</i>     |
| <i>Geloina erosa</i>          | AB076927 | <i>Geloina expansa</i>        | no id   | no id   | no id     | no id   | no id   | no id     | <i>Geloina expansa</i>       |
| <i>Geloina expansa</i>        | AB498812 | <i>Geloina erosa</i>          | no id   | no id   | no id     | no id   | no id   | no id     | <i>Geloina expansa</i>       |
| <i>Gemmula deshayesii</i>     | HQ834092 | <i>Strombus vittatus</i>      | no id   | no id   | no id     | no id   | no id   | no id     | <i>Gemmula hastula</i>       |
| <i>Gigantidas horikoshii</i>  | HF545113 | <i>Gigantidas horikoshii</i>  | correct | correct | correct   | correct | correct | correct   | <i>Idas sp.</i>              |
| <i>Gigantidas horikoshii</i>  | AB257538 | <i>Gigantidas horikoshii</i>  | correct | correct | correct   | correct | correct | correct   | <i>Idas sp.</i>              |
| <i>Ginebis argenteonitens</i> | AB365231 | <i>Ginebis argenteonitens</i> | correct | correct | correct   | correct | correct | correct   | <i>Cidarina cidaris</i>      |
| <i>Ginebis argenteonitens</i> | EU530112 | <i>Ginebis argenteonitens</i> | correct | correct | correct   | correct | correct | correct   | <i>Cidarina cidaris</i>      |
| <i>Ginebis argenteonitens</i> | EU530111 | <i>Ginebis argenteonitens</i> | correct | correct | correct   | correct | correct | correct   | <i>Cidarina cidaris</i>      |
| <i>Globivenus toreuma</i>     | HQ703342 | <i>Placamen isabellina</i>    | no id   | no id   | no id     | no id   | no id   | no id     | <i>Globivenus toreuma</i>    |
| <i>Glycymeris reevei</i>      | AB076933 | <i>Barbatia lacerata</i>      | no id   | no id   | no id     | no id   | no id   | no id     | <i>Cucullaea labiata</i>     |
| <i>Glycymeris rotunda</i>     | AB076934 | <i>Scapharca gubernaculum</i> | no id   | no id   | no id     | no id   | no id   | no id     | <i>Glycymeris sp.</i>        |
| <i>Golikovia ennae</i>        | AB498779 | <i>Neptunea mikawaensis</i>   | no id   | no id   | no id     | no id   | no id   | no id     | <i>Golikovia fukueae</i>     |
| <i>Golikovia fukueae</i>      | AB498780 | <i>Neptunea polycostata</i>   | no id   | no id   | no id     | no id   | no id   | no id     | <i>Golikovia ennae</i>       |
| <i>Gonatopsis borealis</i>    | AB749275 | <i>Gonatus madokai</i>        | no id   | no id   | no id     | no id   | no id   | no id     | <i>Gonatopsis borealis</i>   |
| <i>Gonatopsis octopedatus</i> | AB749282 | <i>Gonatus madokai</i>        | no id   | no id   | no id     | no id   | no id   | no id     | <i>Gonatopsis japonicus</i>  |
| <i>Gonatus berryi</i>         | AB749280 | <i>Gonatus onyx</i>           | no id   | no id   | incorrect | no id   | no id   | incorrect | <i>Gonatus fabricii</i>      |
| <i>Gonatus kamtschaticus</i>  | AB749274 | <i>Gonatus madokai</i>        | no id   | no id   | incorrect | no id   | no id   | incorrect | <i>Gonatus madokai</i>       |
| <i>Gonatus madokai</i>        | AB749284 | <i>Gonatus madokai</i>        | correct | correct | correct   | correct | correct | correct   | <i>Gonatus kamtschaticus</i> |
| <i>Gonatus madokai</i>        | AB749283 | <i>Gonatus madokai</i>        | correct | correct | correct   | correct | correct | correct   | <i>Gonatus kamtschaticus</i> |
| <i>Gonatus madokai</i>        | AB749278 | <i>Gonatus madokai</i>        | no id   | correct | correct   | no id   | correct | correct   | <i>Gonatus kamtschaticus</i> |

|                               |          |                               |         |         |           |         |         |           |                               |
|-------------------------------|----------|-------------------------------|---------|---------|-----------|---------|---------|-----------|-------------------------------|
| <i>Gonatus onyx</i>           | AB749279 | <i>Gonatus berryi</i>         | no id   | no id   | incorrect | no id   | no id   | incorrect | <i>Gonatus californiensis</i> |
| <i>Gonatus pyros</i>          | AB749273 | <i>Gonatus berryi</i>         | no id   | no id   | no id     | no id   | no id   | no id     | <i>Gonatopsis japonicus</i>   |
| <i>Granata lyrata</i>         | AB365232 | <i>Granata lyrata</i>         | no id   | correct | correct   | no id   | correct | correct   | <i>Guildfordia sp.</i>        |
| <i>Granata lyrata</i>         | EU530114 | <i>Granata lyrata</i>         | no id   | correct | correct   | no id   | correct | correct   | <i>Guildfordia sp.</i>        |
| <i>Guildfordia triumphans</i> | AM049375 | <i>Guildfordia triumphans</i> | correct | correct | correct   | correct | correct | correct   | <i>Guildfordia sp.</i>        |
| <i>Guildfordia triumphans</i> | AM049376 | <i>Guildfordia triumphans</i> | correct | correct | correct   | correct | correct | correct   | <i>Guildfordia sp.</i>        |
| <i>Guildfordia yoka</i>       | AM049377 | <i>Guildfordia yoka</i>       | correct | correct | correct   | correct | correct | correct   | <i>Guildfordia sp.</i>        |
| <i>Guildfordia yoka</i>       | AM049378 | <i>Guildfordia yoka</i>       | correct | correct | correct   | correct | correct | correct   | <i>Guildfordia sp.</i>        |
| <i>Guildfordia yoka</i>       | EU530156 | <i>Guildfordia yoka</i>       | correct | correct | correct   | correct | correct | correct   | <i>Guildfordia sp.</i>        |
| <i>Haminoea japonica</i>      | JN830658 | <i>Haminoea japonica</i>      | correct | correct | correct   | correct | correct | correct   | <i>Haminoea japonica</i>      |
| <i>Haminoea japonica</i>      | JN830657 | <i>Haminoea japonica</i>      | correct | correct | correct   | correct | correct | correct   | <i>Haminoea japonica</i>      |
| <i>Haminoea japonica</i>      | JN830656 | <i>Haminoea japonica</i>      | correct | correct | correct   | correct | correct | correct   | <i>Haminoea japonica</i>      |
| <i>Haminoea japonica</i>      | JN830655 | <i>Haminoea japonica</i>      | correct | correct | correct   | correct | correct | correct   | <i>Haminoea japonica</i>      |
| <i>Haminoea japonica</i>      | JN830654 | <i>Haminoea japonica</i>      | correct | correct | correct   | correct | correct | correct   | <i>Haminoea japonica</i>      |
| <i>Haminoea japonica</i>      | JN830653 | <i>Haminoea japonica</i>      | correct | correct | correct   | correct | correct | correct   | <i>Haminoea japonica</i>      |
| <i>Haminoea japonica</i>      | JN830652 | <i>Haminoea japonica</i>      | correct | correct | correct   | correct | correct | correct   | <i>Haminoea japonica</i>      |
| <i>Haminoea japonica</i>      | KF572981 | <i>Haminoea japonica</i>      | correct | correct | correct   | correct | correct | correct   | <i>Haminoea japonica</i>      |
| <i>Haminoea japonica</i>      | KF572982 | <i>Haminoea japonica</i>      | correct | correct | correct   | correct | correct | correct   | <i>Haminoea japonica</i>      |
| <i>Haminoea japonica</i>      | KF572983 | <i>Haminoea japonica</i>      | correct | correct | correct   | correct | correct | correct   | <i>Haminoea japonica</i>      |
| <i>Haminoea japonica</i>      | JN830651 | <i>Haminoea japonica</i>      | correct | correct | correct   | correct | correct | correct   | <i>Haminoea japonica</i>      |
| <i>Haminoea japonica</i>      | KF572985 | <i>Haminoea japonica</i>      | correct | correct | correct   | correct | correct | correct   | <i>Haminoea japonica</i>      |
| <i>Haminoea japonica</i>      | KF572986 | <i>Haminoea japonica</i>      | correct | correct | correct   | correct | correct | correct   | <i>Haminoea japonica</i>      |
| <i>Haminoea japonica</i>      | KF572987 | <i>Haminoea japonica</i>      | correct | correct | correct   | correct | correct | correct   | <i>Haminoea japonica</i>      |
| <i>Haminoea japonica</i>      | KF572988 | <i>Haminoea japonica</i>      | correct | correct | correct   | correct | correct | correct   | <i>Haminoea japonica</i>      |
| <i>Haminoea japonica</i>      | JN830649 | <i>Haminoea japonica</i>      | correct | correct | correct   | correct | correct | correct   | <i>Haminoea japonica</i>      |
| <i>Haminoea japonica</i>      | JN830648 | <i>Haminoea japonica</i>      | correct | correct | correct   | correct | correct | correct   | <i>Haminoea japonica</i>      |
| <i>Haminoea japonica</i>      | JN830650 | <i>Haminoea japonica</i>      | no id   | no id   | no id     | no id   | no id   | no id     | <i>Haminoea japonica</i>      |
| <i>Haminoea japonica</i>      | KF572952 | <i>Haminoea japonica</i>      | correct | correct | correct   | correct | correct | correct   | <i>Haminoea japonica</i>      |
| <i>Haminoea japonica</i>      | KF572953 | <i>Haminoea japonica</i>      | correct | correct | correct   | correct | correct | correct   | <i>Haminoea japonica</i>      |
| <i>Haminoea japonica</i>      | KF572954 | <i>Haminoea japonica</i>      | correct | correct | correct   | correct | correct | correct   | <i>Haminoea japonica</i>      |
| <i>Haminoea japonica</i>      | KF572958 | <i>Haminoea japonica</i>      | correct | correct | correct   | correct | correct | correct   | <i>Haminoea japonica</i>      |



|                                   |          |                               |         |         |         |         |         |         |                               |
|-----------------------------------|----------|-------------------------------|---------|---------|---------|---------|---------|---------|-------------------------------|
| <i>Haminoea japonica</i>          | KF572959 | <i>Haminoea japonica</i>      | correct | correct | correct | correct | correct | correct | <i>Haminoea japonica</i>      |
| <i>Haminoea japonica</i>          | KF572960 | <i>Haminoea japonica</i>      | correct | correct | correct | correct | correct | correct | <i>Haminoea japonica</i>      |
| <i>Haminoea japonica</i>          | KF572961 | <i>Haminoea japonica</i>      | correct | correct | correct | correct | correct | correct | <i>Haminoea japonica</i>      |
| <i>Haminoea japonica</i>          | KF572962 | <i>Haminoea japonica</i>      | correct | correct | correct | correct | correct | correct | <i>Haminoea japonica</i>      |
| <i>Haminoea japonica</i>          | KF572963 | <i>Haminoea japonica</i>      | correct | correct | correct | correct | correct | correct | <i>Haminoea japonica</i>      |
| <i>Haminoea japonica</i>          | KF572964 | <i>Haminoea japonica</i>      | correct | correct | correct | correct | correct | correct | <i>Haminoea japonica</i>      |
| <i>Haminoea japonica</i>          | KF572965 | <i>Haminoea japonica</i>      | correct | correct | correct | correct | correct | correct | <i>Haminoea japonica</i>      |
| <i>Haminoea japonica</i>          | KF572966 | <i>Haminoea japonica</i>      | correct | correct | correct | correct | correct | correct | <i>Haminoea japonica</i>      |
| <i>Haminoea japonica</i>          | KF572967 | <i>Haminoea japonica</i>      | correct | correct | correct | correct | correct | correct | <i>Haminoea japonica</i>      |
| <i>Haminoea japonica</i>          | KF572968 | <i>Haminoea japonica</i>      | correct | correct | correct | correct | correct | correct | <i>Haminoea japonica</i>      |
| <i>Haminoea japonica</i>          | KF572969 | <i>Haminoea japonica</i>      | correct | correct | correct | correct | correct | correct | <i>Haminoea japonica</i>      |
| <i>Haminoea japonica</i>          | KF572970 | <i>Haminoea japonica</i>      | no id   | correct | correct | no id   | correct | correct | <i>Haminoea japonica</i>      |
| <i>Haminoea japonica</i>          | KF572971 | <i>Haminoea japonica</i>      | correct | correct | correct | correct | correct | correct | <i>Haminoea japonica</i>      |
| <i>Haminoea japonica</i>          | KF572972 | <i>Haminoea japonica</i>      | correct | correct | correct | correct | correct | correct | <i>Haminoea japonica</i>      |
| <i>Haminoea japonica</i>          | KF572973 | <i>Haminoea japonica</i>      | correct | correct | correct | correct | correct | correct | <i>Haminoea japonica</i>      |
| <i>Haminoea japonica</i>          | KF572974 | <i>Haminoea japonica</i>      | correct | correct | correct | correct | correct | correct | <i>Haminoea japonica</i>      |
| <i>Haminoea japonica</i>          | KF572975 | <i>Haminoea japonica</i>      | correct | correct | correct | correct | correct | correct | <i>Haminoea japonica</i>      |
| <i>Haminoea japonica</i>          | KF572976 | <i>Haminoea japonica</i>      | correct | correct | correct | correct | correct | correct | <i>Haminoea japonica</i>      |
| <i>Haminoea japonica</i>          | KF572977 | <i>Haminoea japonica</i>      | correct | correct | correct | correct | correct | correct | <i>Haminoea japonica</i>      |
| <i>Haminoea japonica</i>          | KF572978 | <i>Haminoea japonica</i>      | correct | correct | correct | correct | correct | correct | <i>Haminoea japonica</i>      |
| <i>Haminoea japonica</i>          | KF572979 | <i>Haminoea japonica</i>      | correct | correct | correct | correct | correct | correct | <i>Haminoea japonica</i>      |
| <i>Haminoea japonica</i>          | KF572980 | <i>Haminoea japonica</i>      | correct | correct | correct | correct | correct | correct | <i>Haminoea japonica</i>      |
| <i>Haminoea japonica</i>          | KF572984 | <i>Haminoea japonica</i>      | correct | correct | correct | correct | correct | correct | <i>Haminoea japonica</i>      |
| <i>Hapalochlaena cf. maculosa</i> | AB430529 | <i>Hapalochlaena lunulata</i> | no id   | no id   | no id   | no id   | no id   | no id   | <i>Hapalochlaena fasciata</i> |
| <i>Hapalochlaena fasciata</i>     | AB430530 | <i>Amphioctopus ovulum</i>    | no id   | no id   | no id   | no id   | no id   | no id   | <i>Hapalochlaena lunulata</i> |
| <i>Hapalochlaena lunulata</i>     | HQ846163 | <i>Gonatus madokai</i>        | no id   | no id   | no id   | no id   | no id   | no id   | <i>Hapalochlaena fasciata</i> |
| <i>Hazuregyra watanabei</i>       | HF586245 | <i>Solariella nyssonus</i>    | no id   | no id   | no id   | no id   | no id   | no id   | <i>Solariella nyssonus</i>    |
| <i>Hemifusus colosseus</i>        | HQ834068 | <i>Hemifusus colosseus</i>    | correct | correct | correct | correct | correct | correct | <i>Hemifusus sp.</i>          |
| <i>Hemifusus colosseus</i>        | JN053018 | <i>Hemifusus colosseus</i>    | correct | correct | correct | correct | correct | correct | <i>Hemifusus sp.</i>          |
| <i>Hemifusus ternatanus</i>       | HQ834067 | <i>Hemifusus ternatanus</i>   | correct | correct | correct | correct | correct | correct | <i>Hemifusus colosseus</i>    |
| <i>Hemifusus ternatanus</i>       | JN053017 | <i>Hemifusus ternatanus</i>   | correct | correct | correct | correct | correct | correct | <i>Hemifusus colosseus</i>    |



|                                 |          |                                 |           |           |           |           |           |           |                                 |
|---------------------------------|----------|---------------------------------|-----------|-----------|-----------|-----------|-----------|-----------|---------------------------------|
| <i>Heterololigo bleekeri</i>    | AB441181 | <i>Heterololigo bleekeri</i>    | no id     | correct   | correct   | no id     | correct   | correct   | <i>Loligo vulgaris</i>          |
| <i>Heterololigo bleekeri</i>    | AB441180 | <i>Heterololigo bleekeri</i>    | no id     | correct   | correct   | no id     | correct   | correct   | <i>Loligo vulgaris</i>          |
| <i>Heterololigo bleekeri</i>    | AB441179 | <i>Heterololigo bleekeri</i>    | correct   | correct   | correct   | correct   | correct   | correct   | <i>Loligo vulgaris</i>          |
| <i>Homalopoma granuliferum</i>  | AM049347 | <i>Homalopoma granuliferum</i>  | correct   | correct   | correct   | correct   | correct   | correct   | <i>Turbo sp.</i>                |
| <i>Homalopoma granuliferum</i>  | AB365217 | <i>Homalopoma granuliferum</i>  | correct   | correct   | correct   | correct   | correct   | correct   | <i>Turbo sp.</i>                |
| <i>Homalopoma nocturnum</i>     | AM049348 | <i>Homalopoma sangarensense</i> | no id     | incorrect | incorrect | no id     | incorrect | incorrect | <i>Homalopoma sangarensense</i> |
| <i>Homalopoma sangarensense</i> | AM049350 | <i>Homalopoma nocturnum</i>     | no id     | incorrect | incorrect | no id     | incorrect | incorrect | <i>Homalopoma nocturnum</i>     |
| <i>Brachidontes mutalilis</i>   | GQ480306 | <i>Hormomya mutalilis</i>       | correct   | correct   | correct   | correct   | correct   | correct   | <i>Hormomya exustus</i>         |
| <i>Brachidontes mutalilis</i>   | GQ480307 | <i>Hormomya mutalilis</i>       | no id     | correct   | correct   | no id     | correct   | correct   | <i>Hormomya exustus</i>         |
| <i>Brachidontes mutalilis</i>   | GQ480308 | <i>Hormomya mutalilis</i>       | correct   | correct   | correct   | correct   | correct   | correct   | <i>Hormomya exustus</i>         |
| <i>Brachidontes mutalilis</i>   | GQ480309 | <i>Hormomya mutalilis</i>       | correct   | correct   | correct   | correct   | correct   | correct   | <i>Hormomya exustus</i>         |
| <i>Brachidontes mutalilis</i>   | GQ480310 | <i>Hormomya mutalilis</i>       | no id     | correct   | correct   | no id     | correct   | correct   | <i>Hormomya exustus</i>         |
| <i>Idasola japonica</i>         | AB257537 | <i>Idasola japonica</i>         | correct   | correct   | correct   | correct   | correct   | correct   | <i>Idas sp.</i>                 |
| <i>Idasola japonica</i>         | AB257536 | <i>Idasola japonica</i>         | correct   | correct   | correct   | correct   | correct   | correct   | <i>Idas sp.</i>                 |
| <i>Idiosepius biserialis</i>    | EU008955 | <i>Idiosepius paradoxus</i>     | ambiguous | ambiguous | ambiguous | ambiguous | ambiguous | ambiguous | <i>Idiosepius macrocheir</i>    |
| <i>Idiosepius biserialis</i>    | EU008954 | <i>Idiosepius paradoxus</i>     | ambiguous | ambiguous | ambiguous | ambiguous | ambiguous | ambiguous | <i>Idiosepius macrocheir</i>    |
| <i>Idiosepius biserialis</i>    | EU008953 | <i>Idiosepius paradoxus</i>     | ambiguous | ambiguous | ambiguous | ambiguous | ambiguous | ambiguous | <i>Idiosepius macrocheir</i>    |
| <i>Idiosepius paradoxus</i>     | EU008997 | <i>Idiosepius paradoxus</i>     | correct   | correct   | correct   | correct   | ambiguous | ambiguous | <i>Idiosepius macrocheir</i>    |
| <i>Idiosepius paradoxus</i>     | EU008996 | <i>Idiosepius paradoxus</i>     | correct   | correct   | correct   | correct   | ambiguous | ambiguous | <i>Idiosepius macrocheir</i>    |
| <i>Idiosepius paradoxus</i>     | EU008995 | <i>Idiosepius biserialis</i>    | ambiguous | ambiguous | ambiguous | ambiguous | ambiguous | ambiguous | <i>Idiosepius macrocheir</i>    |
| <i>Idiosepius paradoxus</i>     | EU008994 | <i>Idiosepius paradoxus</i>     | correct   | correct   | correct   | correct   | ambiguous | ambiguous | <i>Idiosepius macrocheir</i>    |
| <i>Idiosepius paradoxus</i>     | EU008993 | <i>Idiosepius paradoxus</i>     | correct   | correct   | correct   | correct   | ambiguous | ambiguous | <i>Idiosepius macrocheir</i>    |
| <i>Idiosepius paradoxus</i>     | EU008992 | <i>Idiosepius paradoxus</i>     | correct   | correct   | correct   | correct   | ambiguous | ambiguous | <i>Idiosepius macrocheir</i>    |
| <i>Idiosepius paradoxus</i>     | EU008991 | <i>Idiosepius biserialis</i>    | ambiguous | ambiguous | ambiguous | ambiguous | ambiguous | ambiguous | <i>Idiosepius macrocheir</i>    |
| <i>Idiosepius paradoxus</i>     | EU008990 | <i>Idiosepius paradoxus</i>     | correct   | correct   | correct   | correct   | ambiguous | ambiguous | <i>Idiosepius macrocheir</i>    |
| <i>Idiosepius paradoxus</i>     | EU008989 | <i>Idiosepius paradoxus</i>     | correct   | correct   | correct   | correct   | ambiguous | ambiguous | <i>Idiosepius macrocheir</i>    |
| <i>Idiosepius paradoxus</i>     | EU008988 | <i>Idiosepius paradoxus</i>     | correct   | correct   | correct   | correct   | ambiguous | ambiguous | <i>Idiosepius macrocheir</i>    |
| <i>Idiosepius paradoxus</i>     | EU008985 | <i>Idiosepius paradoxus</i>     | correct   | correct   | correct   | correct   | ambiguous | ambiguous | <i>Idiosepius macrocheir</i>    |
| <i>Idiosepius paradoxus</i>     | EU008984 | <i>Idiosepius paradoxus</i>     | correct   | correct   | correct   | correct   | ambiguous | ambiguous | <i>Idiosepius macrocheir</i>    |
| <i>Idiosepius paradoxus</i>     | EU008983 | <i>Idiosepius paradoxus</i>     | correct   | correct   | correct   | correct   | ambiguous | ambiguous | <i>Idiosepius macrocheir</i>    |
| <i>Idiosepius paradoxus</i>     | EU008982 | <i>Idiosepius paradoxus</i>     | correct   | correct   | correct   | correct   | ambiguous | ambiguous | <i>Idiosepius macrocheir</i>    |

|                               |          |                               |           |           |           |           |           |           |           |                              |
|-------------------------------|----------|-------------------------------|-----------|-----------|-----------|-----------|-----------|-----------|-----------|------------------------------|
| <i>Idiosepius paradoxus</i>   | EU008981 | <i>Idiosepius biserialis</i>  | ambiguous | ambiguous | ambiguous | ambiguous | ambiguous | ambiguous | ambiguous | <i>Idiosepius macrocheir</i> |
| <i>Idiosepius paradoxus</i>   | EU008980 | <i>Idiosepius paradoxus</i>   | correct   | correct   | correct   | correct   | ambiguous | ambiguous | ambiguous | <i>Idiosepius macrocheir</i> |
| <i>Idiosepius paradoxus</i>   | EU008979 | <i>Idiosepius paradoxus</i>   | correct   | correct   | correct   | correct   | ambiguous | ambiguous | ambiguous | <i>Idiosepius macrocheir</i> |
| <i>Idiosepius paradoxus</i>   | EU008987 | <i>Idiosepius paradoxus</i>   | correct   | correct   | correct   | correct   | correct   | correct   | correct   | <i>Idiosepius biserialis</i> |
| <i>Idiosepius paradoxus</i>   | EU008986 | <i>Idiosepius paradoxus</i>   | correct   | correct   | correct   | correct   | correct   | correct   | correct   | <i>Idiosepius biserialis</i> |
| <i>Isognomon acutirostris</i> | AB076926 | <i>Isognomon nucleus</i>      | no id     | incorrect | incorrect | no id     | incorrect | incorrect | incorrect | <i>Isognomon nucleus</i>     |
| <i>Isognomon nucleus</i>      | KU341970 | <i>Isognomon acutirostris</i> | correct   | correct   | correct   | correct   | correct   | correct   | correct   | <i>Isognomon nucleus</i>     |
| <i>Isognomon ephippium</i>    | KU341971 | <i>Isognomon ephippium</i>    | no id     | incorrect | incorrect | no id     | incorrect | incorrect | incorrect | <i>Isognomon sp.</i>         |
| <i>Isognomon ephippium</i>    | KU341972 | <i>Isognomon ephippium</i>    | correct   | correct   | correct   | correct   | correct   | correct   | correct   | <i>Isognomon sp.</i>         |
| <i>Isognomon ephippium</i>    | KU341973 | <i>Isognomon ephippium</i>    | correct   | correct   | correct   | correct   | correct   | correct   | correct   | <i>Isognomon sp.</i>         |
| <i>Isognomon ephippium</i>    | KU341974 | <i>Isognomon ephippium</i>    | correct   | correct   | correct   | correct   | correct   | correct   | correct   | <i>Isognomon sp.</i>         |
| <i>Isognomon ephippium</i>    | KU341975 | <i>Isognomon ephippium</i>    | no id     | correct   | correct   | no id     | correct   | correct   | correct   | <i>Isognomon sp.</i>         |
| <i>Isognomon legumen</i>      | KU341965 | <i>Isognomon legumen</i>      | correct   | correct   | correct   | correct   | correct   | correct   | correct   | <i>Isognomon ephippium</i>   |
| <i>Isognomon legumen</i>      | KU341966 | <i>Isognomon legumen</i>      | correct   | correct   | correct   | correct   | correct   | correct   | correct   | <i>Isognomon ephippium</i>   |
| <i>Isognomon legumen</i>      | KU341967 | <i>Isognomon legumen</i>      | correct   | correct   | correct   | correct   | correct   | correct   | correct   | <i>Isognomon ephippium</i>   |
| <i>Isognomon legumen</i>      | KU341968 | <i>Isognomon legumen</i>      | correct   | correct   | correct   | correct   | correct   | correct   | correct   | <i>Isognomon ephippium</i>   |
| <i>Isognomon legumen</i>      | KU341969 | <i>Isognomon legumen</i>      | correct   | correct   | correct   | correct   | correct   | correct   | correct   | <i>Isognomon ephippium</i>   |
| <i>Isognomon perna</i>        | KU341963 | <i>Isognomon perna</i>        | no id     | no id     | no id     | no id     | no id     | no id     | no id     | <i>Isognomon legumen</i>     |
| <i>Isognomon perna</i>        | KU341964 | <i>Isognomon perna</i>        | correct   | correct   | correct   | correct   | correct   | correct   | correct   | <i>Isognomon legumen</i>     |
| <i>Isognomon perna</i>        | AB076918 | <i>Isognomon perna</i>        | correct   | correct   | correct   | correct   | correct   | correct   | correct   | <i>Isognomon legumen</i>     |
| <i>Kelletia lischkei</i>      | HM180632 | <i>Kelletia lischkei</i>      | correct   | correct   | correct   | correct   | correct   | correct   | correct   | <i>Fasciolaridae sp.</i>     |
| <i>Kelletia lischkei</i>      | HM180633 | <i>Kelletia lischkei</i>      | correct   | correct   | correct   | correct   | correct   | correct   | correct   | <i>Fasciolaridae sp.</i>     |
| <i>Kelletia lischkei</i>      | HM180634 | <i>Kelletia lischkei</i>      | correct   | correct   | correct   | correct   | correct   | correct   | correct   | <i>Fasciolaridae sp.</i>     |
| <i>Kelletia lischkei</i>      | HM180635 | <i>Kelletia lischkei</i>      | correct   | correct   | correct   | correct   | correct   | correct   | correct   | <i>Fasciolaridae sp.</i>     |
| <i>Kelletia lischkei</i>      | HM180636 | <i>Kelletia lischkei</i>      | correct   | correct   | correct   | correct   | correct   | correct   | correct   | <i>Fasciolaridae sp.</i>     |
| <i>Lambis lambis</i>          | JF693383 | <i>Lambis lambis</i>          | correct   | correct   | correct   | correct   | correct   | correct   | correct   | <i>Lambis truncata</i>       |
| <i>Lambis lambis</i>          | JF693384 | <i>Lambis lambis</i>          | correct   | correct   | correct   | correct   | correct   | correct   | correct   | <i>Lambis truncata</i>       |
| <i>Lambis lambis</i>          | JF693385 | <i>Lambis lambis</i>          | correct   | correct   | correct   | correct   | correct   | correct   | correct   | <i>Lambis truncata</i>       |
| <i>Lepeta caeca</i>           | AB543978 | <i>Lepeta caeca</i>           | no id     | correct   | correct   | no id     | correct   | correct   | correct   | <i>Limalepeta lima</i>       |
| <i>Lepeta caeca</i>           | AB238458 | <i>Lepeta caeca</i>           | no id     | correct   | correct   | no id     | correct   | correct   | correct   | <i>Limalepeta lima</i>       |
| <i>Lepetodrilus nux</i>       | AB820805 | <i>Lepetodrilus nux</i>       | correct   | correct   | correct   | correct   | correct   | correct   | correct   | <i>Lepetodrilus sp.</i>      |



|                              |          |                              |         |         |         |         |         |         |                             |
|------------------------------|----------|------------------------------|---------|---------|---------|---------|---------|---------|-----------------------------|
| <i>Lepetodrilus nux</i>      | AB820837 | <i>Lepetodrilus nux</i>      | correct | correct | correct | correct | correct | correct | <i>Lepetodrilus sp.</i>     |
| <i>Lepetodrilus nux</i>      | AB820838 | <i>Lepetodrilus nux</i>      | correct | correct | correct | correct | correct | correct | <i>Lepetodrilus sp.</i>     |
| <i>Lepetodrilus nux</i>      | AB820839 | <i>Lepetodrilus nux</i>      | correct | correct | correct | correct | correct | correct | <i>Lepetodrilus sp.</i>     |
| <i>Limalepeta lima</i>       | AB543979 | <i>Limalepeta lima</i>       | no id   | correct | correct | no id   | correct | correct | <i>Lepeta caeca</i>         |
| <i>Limalepeta lima</i>       | AB543980 | <i>Limalepeta lima</i>       | no id   | correct | correct | no id   | correct | correct | <i>Lepeta caeca</i>         |
| <i>Limnoperna fortunei</i>   | AB828682 | <i>Limnoperna fortunei</i>   | correct | correct | correct | correct | correct | correct | <i>Modiolus kurilensis</i>  |
| <i>Limnoperna fortunei</i>   | AB828681 | <i>Limnoperna fortunei</i>   | correct | correct | correct | correct | correct | correct | <i>Modiolus kurilensis</i>  |
| <i>Limnoperna fortunei</i>   | AB828680 | <i>Limnoperna fortunei</i>   | no id   | correct | correct | no id   | correct | correct | <i>Modiolus kurilensis</i>  |
| <i>Limnoperna fortunei</i>   | AB828679 | <i>Limnoperna fortunei</i>   | correct | correct | correct | correct | correct | correct | <i>Modiolus kurilensis</i>  |
| <i>Limnoperna fortunei</i>   | AB520627 | <i>Limnoperna fortunei</i>   | correct | correct | correct | correct | correct | correct | <i>Modiolus kurilensis</i>  |
| <i>Limnoperna fortunei</i>   | AB520626 | <i>Limnoperna fortunei</i>   | correct | correct | correct | correct | correct | correct | <i>Modiolus kurilensis</i>  |
| <i>Limnoperna fortunei</i>   | AB520625 | <i>Limnoperna fortunei</i>   | correct | correct | correct | correct | correct | correct | <i>Modiolus kurilensis</i>  |
| <i>Limnoperna fortunei</i>   | AB520624 | <i>Limnoperna fortunei</i>   | correct | correct | correct | correct | correct | correct | <i>Modiolus kurilensis</i>  |
| <i>Limnoperna fortunei</i>   | AB520623 | <i>Limnoperna fortunei</i>   | correct | correct | correct | correct | correct | correct | <i>Modiolus kurilensis</i>  |
| <i>Limnoperna fortunei</i>   | AB520622 | <i>Limnoperna fortunei</i>   | no id   | correct | correct | no id   | correct | correct | <i>Modiolus kurilensis</i>  |
| <i>Limnoperna fortunei</i>   | AB520621 | <i>Limnoperna fortunei</i>   | correct | correct | correct | correct | correct | correct | <i>Modiolus kurilensis</i>  |
| <i>Limnoperna fortunei</i>   | AB520620 | <i>Limnoperna fortunei</i>   | correct | correct | correct | correct | correct | correct | <i>Modiolus kurilensis</i>  |
| <i>Limnoperna fortunei</i>   | AB520619 | <i>Limnoperna fortunei</i>   | no id   | correct | correct | no id   | correct | correct | <i>Modiolus kurilensis</i>  |
| <i>Limnoperna fortunei</i>   | AB520618 | <i>Limnoperna fortunei</i>   | correct | correct | correct | correct | correct | correct | <i>Modiolus kurilensis</i>  |
| <i>Limnoperna fortunei</i>   | AB520617 | <i>Limnoperna fortunei</i>   | correct | correct | correct | correct | correct | correct | <i>Modiolus kurilensis</i>  |
| <i>Limnoperna fortunei</i>   | AB520616 | <i>Limnoperna fortunei</i>   | correct | correct | correct | correct | correct | correct | <i>Modiolus kurilensis</i>  |
| <i>Limnoperna fortunei</i>   | AB520615 | <i>Limnoperna fortunei</i>   | correct | correct | correct | correct | correct | correct | <i>Modiolus kurilensis</i>  |
| <i>Limnoperna fortunei</i>   | AB520614 | <i>Limnoperna fortunei</i>   | no id   | correct | correct | no id   | correct | correct | <i>Modiolus kurilensis</i>  |
| <i>Limnoperna fortunei</i>   | AB520613 | <i>Limnoperna fortunei</i>   | no id   | correct | correct | no id   | correct | correct | <i>Modiolus kurilensis</i>  |
| <i>Limnoperna fortunei</i>   | AB520612 | <i>Limnoperna fortunei</i>   | no id   | correct | correct | no id   | correct | correct | <i>Modiolus kurilensis</i>  |
| <i>Lirularia iridescens</i>  | EU530125 | <i>Lirularia iridescens</i>  | correct | correct | correct | correct | correct | correct | <i>Lirularia pygmaea</i>    |
| <i>Lirularia iridescens</i>  | EU530124 | <i>Lirularia iridescens</i>  | correct | correct | correct | correct | correct | correct | <i>Lirularia pygmaea</i>    |
| <i>Lirularia pygmaea</i>     | AB505308 | <i>Lirularia pygmaea</i>     | correct | correct | correct | correct | correct | correct | <i>Lirularia iridescens</i> |
| <i>Lirularia pygmaea</i>     | AB505309 | <i>Lirularia pygmaea</i>     | correct | correct | correct | correct | correct | correct | <i>Lirularia iridescens</i> |
| <i>Littoraria coccinea</i>   | FN557093 | <i>Littoraria intermedia</i> | no id   | no id   | no id   | no id   | no id   | no id   | <i>Littoraria lutea</i>     |
| <i>Littoraria intermedia</i> | FN557104 | <i>Littoraria scabra</i>     | no id   | no id   | no id   | no id   | no id   | no id   | <i>Littorinidae sp.</i>     |

|                               |          |                                 |         |         |           |         |         |           |                               |
|-------------------------------|----------|---------------------------------|---------|---------|-----------|---------|---------|-----------|-------------------------------|
| <i>Littoraria intermedia</i>  | JF693389 | <i>Clypeomorus trailli</i>      | correct | correct | correct   | correct | correct | correct   | <i>Littoraria articulata</i>  |
| <i>Littoraria intermedia</i>  | JF693390 | <i>Littorinopsis intermedia</i> | correct | correct | correct   | correct | correct | correct   | <i>Littoraria articulata</i>  |
| <i>Littoraria melanostoma</i> | HE590830 | <i>Littoraria sinensis</i>      | no id   | no id   | no id     | no id   | no id   | no id     | <i>Littoraria sinensis</i>    |
| <i>Littoraria pallescens</i>  | FN557122 | <i>Littoraria pallescens</i>    | correct | correct | correct   | correct | correct | correct   | <i>Littoraria pallescens</i>  |
| <i>Littoraria pallescens</i>  | AB611831 | <i>Littoraria pallescens</i>    | correct | correct | correct   | correct | correct | correct   | <i>Littoraria pallescens</i>  |
| <i>Littoraria pintado</i>     | AJ488634 | <i>Littorinopsis intermedia</i> | no id   | no id   | no id     | no id   | no id   | no id     | <i>Littoraria intermedia</i>  |
| <i>Littoraria scabra</i>      | FN557135 | <i>Littoraria intermedia</i>    | no id   | no id   | no id     | no id   | no id   | no id     | <i>Littoraria angulifera</i>  |
| <i>Littoraria sinensis</i>    | FN557140 | <i>Littoraria scabra</i>        | no id   | no id   | no id     | no id   | no id   | no id     | <i>Littoraria melanostoma</i> |
| <i>Littorina brevicula</i>    | JF693387 | <i>Littorinopsis intermedia</i> | correct | correct | correct   | correct | correct | correct   | <i>Littorina mandshurica</i>  |
| <i>Littorina brevicula</i>    | JF693386 | <i>Littorina brevicula</i>      | correct | correct | correct   | correct | correct | correct   | <i>Littorina mandshurica</i>  |
| <i>Littorina brevicula</i>    | JF693388 | <i>Littorina brevicula</i>      | correct | correct | correct   | correct | correct | correct   | <i>Littorina mandshurica</i>  |
| <i>Littorina brevicula</i>    | HE590833 | <i>Littorina brevicula</i>      | correct | correct | correct   | correct | correct | correct   | <i>Littorina mandshurica</i>  |
| <i>Littorina horikawai</i>    | HE590836 | <i>Littorina brevicula</i>      | no id   | no id   | no id     | no id   | no id   | no id     | <i>Littorina sitkana</i>      |
| <i>Littorina kasatka</i>      | HE590837 | <i>Littorina mandshurica</i>    | no id   | no id   | no id     | no id   | no id   | no id     | <i>Littorina subrotundata</i> |
| <i>Littorina mandshurica</i>  | HE590838 | <i>Littorina brevicula</i>      | no id   | no id   | incorrect | no id   | no id   | incorrect | <i>Littorina brevicula</i>    |
| <i>Littorina squalida</i>     | HE590843 | <i>Littorina brevicula</i>      | no id   | no id   | no id     | no id   | no id   | no id     | <i>Littorina littorea</i>     |
| <i>Littorinopsis scabra</i>   | JF693391 | <i>Littorinopsis intermedia</i> | no id   | no id   | no id     | no id   | no id   | no id     | <i>Littoraria intermedia</i>  |
| <i>Loliolus beka</i>          | HQ529503 | <i>Loliolus beka</i>            | correct | correct | correct   | correct | correct | correct   | <i>Loliolus beka</i>          |
| <i>Loliolus beka</i>          | HQ529504 | <i>Loliolus beka</i>            | correct | correct | correct   | correct | correct | correct   | <i>Loliolus beka</i>          |
| <i>Loliolus beka</i>          | HQ529506 | <i>Loliolus beka</i>            | correct | correct | correct   | correct | correct | correct   | <i>Loliolus beka</i>          |
| <i>Loliolus beka</i>          | HQ529507 | <i>Loliolus beka</i>            | correct | correct | correct   | correct | correct | correct   | <i>Loliolus beka</i>          |
| <i>Loliolus beka</i>          | HQ529508 | <i>Loliolus beka</i>            | correct | correct | correct   | correct | correct | correct   | <i>Loliolus beka</i>          |
| <i>Loliolus beka</i>          | HQ529509 | <i>Loliolus beka</i>            | correct | correct | correct   | correct | correct | correct   | <i>Loliolus beka</i>          |
| <i>Loliolus beka</i>          | HQ529510 | <i>Loliolus beka</i>            | correct | correct | correct   | correct | correct | correct   | <i>Loliolus beka</i>          |
| <i>Loliolus beka</i>          | HQ529502 | <i>Loliolus beka</i>            | no id   | no id   | correct   | no id   | no id   | correct   | <i>Loliolus beka</i>          |
| <i>Loliolus beka</i>          | HQ529505 | <i>Loliolus beka</i>            | correct | correct | correct   | correct | correct | correct   | <i>Loliolus beka</i>          |
| <i>Loliolus beka</i>          | HQ529511 | <i>Loliolus beka</i>            | correct | correct | correct   | correct | correct | correct   | <i>Loliolus beka</i>          |
| <i>Loliolus beka</i>          | HQ529512 | <i>Loliolus beka</i>            | no id   | correct | correct   | no id   | correct | correct   | <i>Loliolus beka</i>          |
| <i>Loliolus beka</i>          | HQ529513 | <i>Loliolus beka</i>            | correct | correct | correct   | correct | correct | correct   | <i>Loliolus beka</i>          |
| <i>Loliolus beka</i>          | HQ529514 | <i>Loliolus beka</i>            | correct | correct | correct   | correct | correct | correct   | <i>Loliolus beka</i>          |
| <i>Loliolus beka</i>          | HQ529515 | <i>Loliolus beka</i>            | correct | correct | correct   | correct | correct | correct   | <i>Loliolus beka</i>          |

|                          |          |                            |         |         |         |         |         |         |                         |
|--------------------------|----------|----------------------------|---------|---------|---------|---------|---------|---------|-------------------------|
| <i>Loliolus beka</i>     | HQ529516 | <i>Loliolus beka</i>       | correct | correct | correct | correct | correct | correct | <i>Loliolus beka</i>    |
| <i>Loliolus japonica</i> | HQ529517 | <i>Loliolus japonicus</i>  | correct | correct | correct | correct | correct | correct | <i>Loliolus beka</i>    |
| <i>Loliolus japonica</i> | HQ529518 | <i>Loliolus japonicus</i>  | correct | correct | correct | correct | correct | correct | <i>Loliolus beka</i>    |
| <i>Loliolus japonica</i> | HQ529519 | <i>Loliolus japonicus</i>  | correct | correct | correct | correct | correct | correct | <i>Loliolus beka</i>    |
| <i>Loliolus japonica</i> | HQ529520 | <i>Loliolus japonicus</i>  | correct | correct | correct | correct | correct | correct | <i>Loliolus beka</i>    |
| <i>Loliolus japonica</i> | HQ529521 | <i>Loliolus japonicus</i>  | correct | correct | correct | correct | correct | correct | <i>Loliolus beka</i>    |
| <i>Loliolus japonica</i> | HQ529522 | <i>Loliolus japonicus</i>  | correct | correct | correct | correct | correct | correct | <i>Loliolus beka</i>    |
| <i>Loliolus uyii</i>     | HQ529524 | <i>Loliolus uyii</i>       | correct | correct | correct | correct | correct | correct | <i>Loliolus beka</i>    |
| <i>Loliolus uyii</i>     | HQ529523 | <i>Loliolus uyii</i>       | correct | correct | correct | correct | correct | correct | <i>Loliolus beka</i>    |
| <i>Loliolus uyii</i>     | HQ529525 | <i>Loliolus uyii</i>       | correct | correct | correct | correct | correct | correct | <i>Loliolus beka</i>    |
| <i>Loliolus uyii</i>     | HQ529526 | <i>Loliolus uyii</i>       | correct | correct | correct | correct | correct | correct | <i>Loliolus beka</i>    |
| <i>Loliolus uyii</i>     | HQ529527 | <i>Loliolus uyii</i>       | correct | correct | correct | correct | correct | correct | <i>Loliolus beka</i>    |
| <i>Lottia cassis</i>     | KM221034 | <i>Lottia cassis</i>       | correct | correct | correct | correct | correct | correct | <i>Lottia cassis</i>    |
| <i>Lottia cassis</i>     | KM221036 | <i>Lottia cassis</i>       | correct | correct | correct | correct | correct | correct | <i>Lottia cassis</i>    |
| <i>Lottia cassis</i>     | KM221042 | <i>Lottia cassis</i>       | correct | correct | correct | correct | correct | correct | <i>Lottia cassis</i>    |
| <i>Lottia cassis</i>     | KM221043 | <i>Lottia cassis</i>       | correct | correct | correct | correct | correct | correct | <i>Lottia cassis</i>    |
| <i>Lottia cassis</i>     | KM221115 | <i>Lottia cassis</i>       | correct | correct | correct | correct | correct | correct | <i>Lottia cassis</i>    |
| <i>Lottia cassis</i>     | KM221116 | <i>Lottia cassis</i>       | correct | correct | correct | correct | correct | correct | <i>Lottia cassis</i>    |
| <i>Lottia dorsuosa</i>   | KM221054 | <i>Lottia dorsuosa</i>     | correct | correct | correct | correct | correct | correct | <i>Lottia luchuana</i>  |
| <i>Lottia dorsuosa</i>   | KM221109 | <i>Lottia dorsuosa</i>     | correct | correct | correct | correct | correct | correct | <i>Lottia luchuana</i>  |
| <i>Lottia dorsuosa</i>   | KM221108 | <i>Lottia dorsuosa</i>     | correct | correct | correct | correct | correct | correct | <i>Lottia luchuana</i>  |
| <i>Lottia kogamogai</i>  | AB238467 | <i>Lottia cassis</i>       | no id   | no id   | no id   | no id   | no id   | no id   | <i>Lottia digitalis</i> |
| <i>Lottia langfordi</i>  | AB238468 | <i>Nipponacmea nigrans</i> | no id   | no id   | no id   | no id   | no id   | no id   | <i>Lottia sp.</i>       |
| <i>Lottia lindbergi</i>  | AB238470 | <i>Lottia cassis</i>       | no id   | no id   | no id   | no id   | no id   | no id   | <i>Lottia luchuana</i>  |
| <i>Lottia luchuana</i>   | KM221056 | <i>Lottia luchuana</i>     | correct | correct | correct | correct | correct | correct | <i>Lottia luchuana</i>  |
| <i>Lottia luchuana</i>   | KM221094 | <i>Lottia luchuana</i>     | correct | correct | correct | correct | correct | correct | <i>Lottia luchuana</i>  |
| <i>Lottia luchuana</i>   | KM221044 | <i>Lottia luchuana</i>     | correct | correct | correct | correct | correct | correct | <i>Lottia luchuana</i>  |
| <i>Lottia luchuana</i>   | KM221045 | <i>Lottia luchuana</i>     | correct | correct | correct | correct | correct | correct | <i>Lottia luchuana</i>  |
| <i>Lottia luchuana</i>   | KM221048 | <i>Lottia luchuana</i>     | correct | correct | correct | correct | correct | correct | <i>Lottia luchuana</i>  |
| <i>Lottia luchuana</i>   | KM221049 | <i>Lottia luchuana</i>     | correct | correct | correct | correct | correct | correct | <i>Lottia luchuana</i>  |
| <i>Lottia luchuana</i>   | KM221101 | <i>Lottia luchuana</i>     | correct | correct | correct | correct | correct | correct | <i>Lottia luchuana</i>  |



|                             |          |                            |           |           |           |           |           |           |                            |
|-----------------------------|----------|----------------------------|-----------|-----------|-----------|-----------|-----------|-----------|----------------------------|
| <i>Lottia luchuana</i>      | AB238471 | <i>Lottia luchuana</i>     | correct   | correct   | correct   | correct   | correct   | correct   | <i>Lottia luchuana</i>     |
| <i>Lottia luchuana</i>      | KM221100 | <i>Lottia luchuana</i>     | no id     | correct   | correct   | no id     | correct   | correct   | <i>Lottia luchuana</i>     |
| <i>Lottia tenuisculpta</i>  | AB238482 | <i>Lottia luchuana</i>     | no id     | no id     | no id     | no id     | no id     | no id     | <i>Lottia septiformis</i>  |
| <i>Lunella cinerea</i>      | AB588872 | <i>Lunella cinerea</i>     | correct   | correct   | correct   | correct   | correct   | correct   | <i>Lunella cinerea</i>     |
| <i>Lunella cinerea</i>      | AB297735 | <i>Lunella cinerea</i>     | correct   | correct   | correct   | correct   | correct   | correct   | <i>Lunella cinerea</i>     |
| <i>Lunella cinerea</i>      | AB297734 | <i>Lunella cinerea</i>     | correct   | correct   | correct   | correct   | correct   | correct   | <i>Lunella cinerea</i>     |
| <i>Lunella cinerea</i>      | AB297733 | <i>Lunella cinerea</i>     | correct   | correct   | correct   | correct   | correct   | correct   | <i>Lunella cinerea</i>     |
| <i>Lunella coreensis</i>    | HQ681192 | <i>Lunella coreensis</i>   | ambiguous | ambiguous | ambiguous | ambiguous | ambiguous | ambiguous | <i>Lunella coronata</i>    |
| <i>Lunella coreensis</i>    | HQ681191 | <i>Lunella coreensis</i>   | ambiguous | ambiguous | ambiguous | ambiguous | ambiguous | ambiguous | <i>Lunella coronata</i>    |
| <i>Lunella coreensis</i>    | AM403861 | <i>Lunella coreensis</i>   | ambiguous | ambiguous | ambiguous | ambiguous | ambiguous | ambiguous | <i>Lunella coronata</i>    |
| <i>Lunella coreensis</i>    | AM403860 | <i>Lunella coreensis</i>   | ambiguous | ambiguous | ambiguous | ambiguous | ambiguous | ambiguous | <i>Lunella coronata</i>    |
| <i>Lunella coreensis</i>    | AB297732 | <i>Lunella coreensis</i>   | ambiguous | ambiguous | ambiguous | ambiguous | ambiguous | ambiguous | <i>Lunella coronata</i>    |
| <i>Lunella coreensis</i>    | AB297731 | <i>Lunella coreensis</i>   | ambiguous | ambiguous | ambiguous | ambiguous | ambiguous | ambiguous | <i>Lunella coronata</i>    |
| <i>Lunella coreensis</i>    | AB297730 | <i>Lunella coreensis</i>   | ambiguous | ambiguous | ambiguous | ambiguous | ambiguous | ambiguous | <i>Lunella coronata</i>    |
| <i>Lunella coreensis</i>    | HM180657 | <i>Lunella coreensis</i>   | ambiguous | ambiguous | ambiguous | ambiguous | ambiguous | ambiguous | <i>Lunella coronata</i>    |
| <i>Lunella coreensis</i>    | HM180658 | <i>Lunella coreensis</i>   | ambiguous | ambiguous | ambiguous | ambiguous | ambiguous | ambiguous | <i>Lunella coronata</i>    |
| <i>Lunella coreensis</i>    | HM180659 | <i>Lunella coreensis</i>   | ambiguous | ambiguous | ambiguous | ambiguous | ambiguous | ambiguous | <i>Lunella coronata</i>    |
| <i>Lunella moniliformis</i> | AB588878 | <i>Lunella coreensis</i>   | ambiguous | ambiguous | ambiguous | ambiguous | ambiguous | ambiguous | <i>Lunella coronata</i>    |
| <i>Lunella moniliformis</i> | AB588877 | <i>Lunella coreensis</i>   | ambiguous | ambiguous | ambiguous | ambiguous | ambiguous | ambiguous | <i>Lunella coronata</i>    |
| <i>Lunella moniliformis</i> | AB588876 | <i>Lunella coreensis</i>   | ambiguous | ambiguous | ambiguous | ambiguous | ambiguous | ambiguous | <i>Lunella coronata</i>    |
| <i>Lunella coronata</i>     | AB297729 | <i>Lunella granulata</i>   | ambiguous | ambiguous | ambiguous | ambiguous | ambiguous | ambiguous | <i>Lunella ogasawarana</i> |
| <i>Lunella coronata</i>     | AB297728 | <i>Lunella granulata</i>   | ambiguous | ambiguous | ambiguous | ambiguous | ambiguous | ambiguous | <i>Lunella ogasawarana</i> |
| <i>Lunella coronata</i>     | AB297727 | <i>Lunella granulata</i>   | ambiguous | ambiguous | ambiguous | ambiguous | ambiguous | ambiguous | <i>Lunella ogasawarana</i> |
| <i>Lunella granulata</i>    | AM403863 | <i>Lunella coronata</i>    | ambiguous | ambiguous | ambiguous | ambiguous | ambiguous | ambiguous | <i>Lunella ogasawarana</i> |
| <i>Lunella granulata</i>    | AB588892 | <i>Lunella coronata</i>    | ambiguous | ambiguous | ambiguous | ambiguous | ambiguous | ambiguous | <i>Lunella ogasawarana</i> |
| <i>Lunella granulata</i>    | AB588891 | <i>Lunella coronata</i>    | ambiguous | ambiguous | ambiguous | ambiguous | ambiguous | ambiguous | <i>Lunella ogasawarana</i> |
| <i>Lunella granulata</i>    | AM403862 | <i>Lunella coronata</i>    | ambiguous | ambiguous | ambiguous | ambiguous | ambiguous | ambiguous | <i>Lunella ogasawarana</i> |
| <i>Lunella ogasawarana</i>  | AB588883 | <i>Lunella ogasawarana</i> | correct   | correct   | correct   | correct   | correct   | correct   | <i>Lunella coronata</i>    |
| <i>Lunella ogasawarana</i>  | AB588882 | <i>Lunella ogasawarana</i> | correct   | correct   | correct   | correct   | correct   | correct   | <i>Lunella coronata</i>    |
| <i>Lunella ogasawarana</i>  | AB588881 | <i>Lunella ogasawarana</i> | correct   | correct   | correct   | correct   | correct   | correct   | <i>Lunella coronata</i>    |
| <i>Lunella ogasawarana</i>  | AB588880 | <i>Lunella ogasawarana</i> | correct   | correct   | correct   | correct   | correct   | correct   | <i>Lunella coronata</i>    |





|                            |          |                                     |           |           |           |           |           |           |                           |
|----------------------------|----------|-------------------------------------|-----------|-----------|-----------|-----------|-----------|-----------|---------------------------|
| <i>Mactra chinensis</i>    | JN674634 | <i>Mactra chinensis</i>             | correct   | correct   | correct   | correct   | correct   | correct   | <i>Mactra chinensis</i>   |
| <i>Mactra chinensis</i>    | JN674635 | <i>Mactra chinensis</i>             | correct   | correct   | correct   | correct   | correct   | correct   | <i>Mactra chinensis</i>   |
| <i>Mactra chinensis</i>    | KC205870 | <i>Mactra chinensis</i>             | correct   | correct   | correct   | correct   | correct   | correct   | <i>Mactra chinensis</i>   |
| <i>Mactra chinensis</i>    | KC205871 | <i>Mactra chinensis</i>             | correct   | correct   | correct   | correct   | correct   | correct   | <i>Mactra chinensis</i>   |
| <i>Mactra chinensis</i>    | KC205872 | <i>Mactra chinensis</i>             | correct   | correct   | correct   | correct   | correct   | correct   | <i>Mactra chinensis</i>   |
| <i>Mactra chinensis</i>    | KC205873 | <i>Mactra chinensis</i>             | no id     | correct   | correct   | no id     | correct   | correct   | <i>Mactra chinensis</i>   |
| <i>Mactra chinensis</i>    | KC205874 | <i>Mactra chinensis</i>             | correct   | correct   | correct   | correct   | correct   | correct   | <i>Mactra chinensis</i>   |
| <i>Mactra chinensis</i>    | KC205875 | <i>Mactra chinensis</i>             | correct   | correct   | correct   | correct   | correct   | correct   | <i>Mactra chinensis</i>   |
| <i>Mactra chinensis</i>    | KC205876 | <i>Mactra chinensis</i>             | correct   | correct   | correct   | correct   | correct   | correct   | <i>Mactra chinensis</i>   |
| <i>Mactra chinensis</i>    | KC205877 | <i>Mactra chinensis</i>             | correct   | correct   | correct   | correct   | correct   | correct   | <i>Mactra chinensis</i>   |
| <i>Mactra mauclata</i>     | JN674613 | <i>Mactra maculata</i>              | correct   | correct   | correct   | correct   | correct   | correct   | <i>Mactra stultorum</i>   |
| <i>Mactra mauclata</i>     | JN674614 | <i>Mactra maculata</i>              | correct   | correct   | correct   | correct   | correct   | correct   | <i>Mactra stultorum</i>   |
| <i>Mancinella echinata</i> | HE584343 | <i>Mancinella siro</i>              | no id     | no id     | no id     | no id     | no id     | no id     | <i>Mancinella alouina</i> |
| <i>Mancinella siro</i>     | HE584344 | <i>Strombus marginatus robustus</i> | no id     | no id     | no id     | no id     | no id     | no id     | <i>Thais echinulatus</i>  |
| <i>Katelysia hiantiana</i> | GQ855255 | <i>Katelysia hiantiana</i>          | ambiguous | ambiguous | ambiguous | ambiguous | ambiguous | ambiguous | <i>Marcia japonica</i>    |
| <i>Katelysia hiantiana</i> | GQ855256 | <i>Katelysia hiantiana</i>          | ambiguous | ambiguous | ambiguous | ambiguous | ambiguous | ambiguous | <i>Marcia japonica</i>    |
| <i>Katelysia hiantiana</i> | GQ855257 | <i>Katelysia hiantiana</i>          | ambiguous | ambiguous | ambiguous | ambiguous | ambiguous | ambiguous | <i>Marcia japonica</i>    |
| <i>Katelysia hiantiana</i> | HQ703287 | <i>Katelysia hiantiana</i>          | correct   | correct   | correct   | correct   | correct   | correct   | <i>Marcia japonica</i>    |
| <i>Katelysia hiantiana</i> | HQ703288 | <i>Katelysia hiantiana</i>          | ambiguous | ambiguous | ambiguous | ambiguous | ambiguous | ambiguous | <i>Marcia japonica</i>    |
| <i>Katelysia hiantiana</i> | HQ703289 | <i>Katelysia hiantiana</i>          | ambiguous | ambiguous | ambiguous | ambiguous | ambiguous | ambiguous | <i>Marcia japonica</i>    |
| <i>Katelysia hiantiana</i> | HQ703290 | <i>Katelysia hiantiana</i>          | ambiguous | ambiguous | ambiguous | ambiguous | ambiguous | ambiguous | <i>Marcia japonica</i>    |
| <i>Katelysia hiantiana</i> | HQ703291 | <i>Katelysia hiantiana</i>          | ambiguous | ambiguous | ambiguous | ambiguous | ambiguous | ambiguous | <i>Marcia japonica</i>    |
| <i>Katelysia hiantiana</i> | HQ703292 | <i>Katelysia hiantiana</i>          | ambiguous | ambiguous | ambiguous | ambiguous | ambiguous | ambiguous | <i>Marcia japonica</i>    |
| <i>Katelysia hiantiana</i> | HQ703293 | <i>Katelysia hiantiana</i>          | ambiguous | ambiguous | ambiguous | ambiguous | ambiguous | ambiguous | <i>Marcia japonica</i>    |
| <i>Katelysia hiantiana</i> | HQ703294 | <i>Katelysia hiantiana</i>          | ambiguous | ambiguous | ambiguous | ambiguous | ambiguous | ambiguous | <i>Marcia japonica</i>    |
| <i>Katelysia hiantiana</i> | JN898939 | <i>Katelysia hiantiana</i>          | no id     | ambiguous | ambiguous | no id     | ambiguous | ambiguous | <i>Marcia japonica</i>    |
| <i>Katelysia hiantiana</i> | HM124599 | <i>Katelysia hiantiana</i>          | incorrect | incorrect | incorrect | incorrect | ambiguous | ambiguous | <i>Marcia japonica</i>    |
| <i>Marcia japonica</i>     | HQ703282 | <i>Marcia japonica</i>              | ambiguous | ambiguous | ambiguous | ambiguous | ambiguous | ambiguous | <i>Katelysia hiantina</i> |
| <i>Marcia japonica</i>     | HQ703283 | <i>Marcia japonica</i>              | correct   | correct   | correct   | correct   | correct   | correct   | <i>Katelysia hiantina</i> |
| <i>Marcia japonica</i>     | HQ703284 | <i>Marcia japonica</i>              | correct   | correct   | correct   | correct   | correct   | correct   | <i>Katelysia hiantina</i> |
| <i>Marcia japonica</i>     | HQ703285 | <i>Marcia japonica</i>              | correct   | correct   | correct   | correct   | correct   | correct   | <i>Katelysia hiantina</i> |

|                               |          |                               |         |         |         |         |         |         |                               |
|-------------------------------|----------|-------------------------------|---------|---------|---------|---------|---------|---------|-------------------------------|
| <i>Marcia japonica</i>        | HQ703286 | <i>Marcia japonica</i>        | correct | correct | correct | correct | correct | correct | <i>Katelysia hiantina</i>     |
| <i>Marcia japonica</i>        | GQ855258 | <i>Marcia japonica</i>        | correct | correct | correct | correct | correct | correct | <i>Katelysia hiantina</i>     |
| <i>Marcia japonica</i>        | GQ855259 | <i>Marcia japonica</i>        | correct | correct | correct | correct | correct | correct | <i>Katelysia hiantina</i>     |
| <i>Marcia japonica</i>        | GQ855260 | <i>Marcia japonica</i>        | correct | correct | correct | correct | correct | correct | <i>Katelysia hiantina</i>     |
| <i>Marcia japonica</i>        | GQ855261 | <i>Marcia japonica</i>        | correct | correct | correct | correct | correct | correct | <i>Katelysia hiantina</i>     |
| <i>Marcia japonica</i>        | GQ855262 | <i>Marcia japonica</i>        | correct | correct | correct | correct | correct | correct | <i>Katelysia hiantina</i>     |
| <i>Marcia marmorata</i>       | HQ703296 | <i>Marcia marmorata</i>       | correct | correct | correct | correct | correct | correct | <i>Tapes dorsatus</i>         |
| <i>Marcia marmorata</i>       | HQ703297 | <i>Marcia marmorata</i>       | correct | correct | correct | correct | correct | correct | <i>Tapes dorsatus</i>         |
| <i>Marcia marmorata</i>       | HQ703298 | <i>Marcia marmorata</i>       | correct | correct | correct | correct | correct | correct | <i>Tapes dorsatus</i>         |
| <i>Marcia marmorata</i>       | HQ703299 | <i>Marcia marmorata</i>       | correct | correct | correct | correct | correct | correct | <i>Tapes dorsatus</i>         |
| <i>Marcia marmorata</i>       | HQ703300 | <i>Marcia marmorata</i>       | correct | correct | correct | correct | correct | correct | <i>Tapes dorsatus</i>         |
| <i>Marcia marmorata</i>       | HQ703301 | <i>Marcia marmorata</i>       | no id   | correct | correct | no id   | correct | correct | <i>Tapes dorsatus</i>         |
| <i>Marcia marmorata</i>       | HQ703302 | <i>Marcia marmorata</i>       | correct | correct | correct | correct | correct | correct | <i>Tapes dorsatus</i>         |
| <i>Marcia marmorata</i>       | HQ703303 | <i>Marcia marmorata</i>       | correct | correct | correct | correct | correct | correct | <i>Tapes dorsatus</i>         |
| <i>Martesia striata</i>       | KJ125424 | <i>Martesia striata</i>       | correct | correct | correct | correct | correct | correct | <i>Mollusca sp.</i>           |
| <i>Martesia striata</i>       | KJ125425 | <i>Martesia striata</i>       | correct | correct | correct | correct | correct | correct | <i>Mollusca sp.</i>           |
| <i>Mauritia arabica</i>       | JF693392 | <i>Mauritia arabica</i>       | no id   | no id   | correct | no id   | no id   | correct | <i>Mauritia arabica</i>       |
| <i>Mauritia arabica</i>       | JF693393 | <i>Mauritia arabica</i>       | correct | correct | correct | correct | correct | correct | <i>Mauritia arabica</i>       |
| <i>Mauritia arabica</i>       | JF693394 | <i>Mauritia arabica</i>       | correct | correct | correct | correct | correct | correct | <i>Mauritia arabica</i>       |
| <i>Mauritia arabica</i>       | JF693395 | <i>Mauritia arabica</i>       | correct | correct | correct | correct | correct | correct | <i>Mauritia arabica</i>       |
| <i>Melanochlamys ezoensis</i> | KJ704899 | <i>Melanochlamys ezoensis</i> | correct | correct | correct | correct | correct | correct | <i>Chelidonura berolina</i>   |
| <i>Melanochlamys ezoensis</i> | KJ704900 | <i>Melanochlamys ezoensis</i> | correct | correct | correct | correct | correct | correct | <i>Chelidonura berolina</i>   |
| <i>Melanochlamys ezoensis</i> | KJ704901 | <i>Melanochlamys ezoensis</i> | correct | correct | correct | correct | correct | correct | <i>Chelidonura berolina</i>   |
| <i>Melanochlamys ezoensis</i> | KJ704902 | <i>Melanochlamys ezoensis</i> | correct | correct | correct | correct | correct | correct | <i>Chelidonura berolina</i>   |
| <i>Melanochlamys ezoensis</i> | KJ704903 | <i>Melanochlamys ezoensis</i> | no id   | correct | correct | no id   | correct | correct | <i>Chelidonura berolina</i>   |
| <i>Melanochlamys ezoensis</i> | KJ704904 | <i>Melanochlamys ezoensis</i> | correct | correct | correct | correct | correct | correct | <i>Chelidonura berolina</i>   |
| <i>Melanochlamys ezoensis</i> | KJ704905 | <i>Melanochlamys ezoensis</i> | correct | correct | correct | correct | correct | correct | <i>Chelidonura berolina</i>   |
| <i>Melanochlamys fukudai</i>  | KJ704906 | <i>Melanochlamys fukudai</i>  | correct | correct | correct | correct | correct | correct | <i>Melanochlamys ezoensis</i> |
| <i>Melanochlamys fukudai</i>  | KJ704907 | <i>Melanochlamys fukudai</i>  | correct | correct | correct | correct | correct | correct | <i>Melanochlamys ezoensis</i> |
| <i>Melanochlamys fukudai</i>  | KJ704908 | <i>Melanochlamys fukudai</i>  | correct | correct | correct | correct | correct | correct | <i>Melanochlamys ezoensis</i> |
| <i>Melanochlamys fukudai</i>  | KJ704909 | <i>Melanochlamys fukudai</i>  | correct | correct | correct | correct | correct | correct | <i>Melanochlamys ezoensis</i> |











|                                |          |                                |           |           |           |           |           |           |           |                                |
|--------------------------------|----------|--------------------------------|-----------|-----------|-----------|-----------|-----------|-----------|-----------|--------------------------------|
| <i>Meretrix petechialis</i>    | HQ703180 | <i>Meretrix petechialis</i>    | ambiguous | ambiguous | ambiguous | ambiguous | ambiguous | ambiguous | ambiguous | <i>Meretrix petechialis</i>    |
| <i>Meretrix petechialis</i>    | HQ703181 | <i>Meretrix lusoria</i>        | ambiguous | ambiguous | ambiguous | ambiguous | ambiguous | ambiguous | ambiguous | <i>Meretrix petechialis</i>    |
| <i>Meretrix petechialis</i>    | HQ703182 | <i>Meretrix lusoria</i>        | ambiguous | ambiguous | ambiguous | ambiguous | ambiguous | ambiguous | ambiguous | <i>Meretrix petechialis</i>    |
| <i>Meretrix petechialis</i>    | HQ703183 | <i>Meretrix petechialis</i>    | ambiguous | ambiguous | ambiguous | ambiguous | ambiguous | ambiguous | ambiguous | <i>Meretrix petechialis</i>    |
| <i>Meretrix petechialis</i>    | HQ703184 | <i>Meretrix petechialis</i>    | ambiguous | ambiguous | ambiguous | ambiguous | ambiguous | ambiguous | ambiguous | <i>Meretrix petechialis</i>    |
| <i>Meretrix petechialis</i>    | HQ703185 | <i>Meretrix petechialis</i>    | ambiguous | ambiguous | ambiguous | ambiguous | ambiguous | ambiguous | ambiguous | <i>Meretrix petechialis</i>    |
| <i>Meretrix petechialis</i>    | HQ703186 | <i>Meretrix petechialis</i>    | ambiguous | ambiguous | ambiguous | ambiguous | ambiguous | ambiguous | ambiguous | <i>Meretrix petechialis</i>    |
| <i>Meretrix petechialis</i>    | HQ703187 | <i>Meretrix petechialis</i>    | ambiguous | ambiguous | ambiguous | ambiguous | ambiguous | ambiguous | ambiguous | <i>Meretrix petechialis</i>    |
| <i>Meretrix petechialis</i>    | HM124584 | <i>Meretrix petechialis</i>    | ambiguous | ambiguous | ambiguous | ambiguous | ambiguous | ambiguous | ambiguous | <i>Meretrix petechialis</i>    |
| <i>Meretrix petechialis</i>    | HM124583 | <i>Meretrix petechialis</i>    | ambiguous | ambiguous | ambiguous | ambiguous | ambiguous | ambiguous | ambiguous | <i>Meretrix petechialis</i>    |
| <i>Meretrix lusoria</i>        | FJ434681 | <i>Meretrix petechialis</i>    | no id     | ambiguous | ambiguous | no id     | ambiguous | ambiguous | ambiguous | <i>Meretrix lusoria</i>        |
| <i>Meretrix lusoria</i>        | AB076924 | <i>Meretrix petechialis</i>    | incorrect | incorrect | incorrect | incorrect | ambiguous | ambiguous | ambiguous | <i>Meretrix lusoria</i>        |
| <i>Meretrix lusoria</i>        | AB853864 | <i>Meretrix lusoria</i>        | correct   | correct   | correct   | correct   | correct   | correct   | correct   | <i>Meretrix petechialis</i>    |
| <i>Meretrix lusoria</i>        | AB853865 | <i>Meretrix lusoria</i>        | correct   | correct   | correct   | correct   | correct   | correct   | correct   | <i>Meretrix petechialis</i>    |
| <i>Meretrix lusoria</i>        | AB613023 | <i>Meretrix lusoria</i>        | correct   | correct   | correct   | correct   | correct   | correct   | correct   | <i>Meretrix petechialis</i>    |
| <i>Meretrix lusoria</i>        | AB613022 | <i>Meretrix lusoria</i>        | correct   | correct   | correct   | correct   | correct   | correct   | correct   | <i>Meretrix petechialis</i>    |
| <i>Meretrix lusoria</i>        | AB280786 | <i>Meretrix lusoria</i>        | correct   | correct   | correct   | correct   | correct   | correct   | correct   | <i>Meretrix petechialis</i>    |
| <i>Mikadotrochus beyrichii</i> | AM049331 | <i>Mikadotrochus beyrichii</i> | no id     | correct   | correct   | no id     | correct   | correct   | correct   | <i>Bayerotrochus africanus</i> |
| <i>Mikadotrochus beyrichii</i> | EU530109 | <i>Mikadotrochus beyrichii</i> | no id     | correct   | correct   | no id     | correct   | correct   | correct   | <i>Bayerotrochus africanus</i> |
| <i>Mimachlamys nobilis</i>     | GU119985 | <i>Mimachlamys nobilis</i>     | correct   | correct   | correct   | correct   | correct   | correct   | correct   |                                |
| <i>Mimachlamys nobilis</i>     | GU119986 | <i>Mimachlamys nobilis</i>     | correct   | correct   | correct   | correct   | correct   | correct   | correct   |                                |
| <i>Mimachlamys nobilis</i>     | GU119987 | <i>Mimachlamys nobilis</i>     | no id     | correct   | correct   | no id     | correct   | correct   | correct   |                                |
| <i>Mimachlamys nobilis</i>     | GU119988 | <i>Mimachlamys nobilis</i>     | correct   | correct   | correct   | correct   | correct   | correct   | correct   |                                |
| <i>Mimachlamys nobilis</i>     | GU119989 | <i>Mimachlamys nobilis</i>     | correct   | correct   | correct   | correct   | correct   | correct   | correct   |                                |
| <i>Mitrella bicincta</i>       | HQ834055 | <i>Mitrella bicincta</i>       | correct   | correct   | correct   | correct   | correct   | correct   | correct   | <i>Amphissa versicolor</i>     |
| <i>Mitrella bicincta</i>       | JN052991 | <i>Mitrella bicincta</i>       | correct   | correct   | correct   | correct   | correct   | correct   | correct   | <i>Amphissa versicolor</i>     |
| <i>Mitrella bicincta</i>       | JN052990 | <i>Mitrella bicincta</i>       | correct   | correct   | correct   | correct   | correct   | correct   | correct   | <i>Amphissa versicolor</i>     |
| <i>Mitrella bicincta</i>       | JN052989 | <i>Mitrella bicincta</i>       | correct   | correct   | correct   | correct   | correct   | correct   | correct   | <i>Amphissa versicolor</i>     |
| <i>Mitrella bicincta</i>       | JN052988 | <i>Mitrella bicincta</i>       | correct   | correct   | correct   | correct   | correct   | correct   | correct   | <i>Amphissa versicolor</i>     |
| <i>Mitrella bicincta</i>       | HM180686 | <i>Mitrella bicincta</i>       | no id     | correct   | correct   | no id     | correct   | correct   | correct   | <i>Amphissa versicolor</i>     |
| <i>Mitrella bicincta</i>       | HM180689 | <i>Mitrella bicincta</i>       | no id     | no id     | correct   | no id     | no id     | correct   | correct   | <i>Amphissa versicolor</i>     |

|                                |          |                                   |           |           |           |           |           |           |                            |
|--------------------------------|----------|-----------------------------------|-----------|-----------|-----------|-----------|-----------|-----------|----------------------------|
| <i>Mitrella bicincta</i>       | HM180683 | <i>Mitrella bicincta</i>          | no id     | ambiguous | ambiguous | no id     | ambiguous | ambiguous | <i>Amphissa columbiana</i> |
| <i>Mitrella bicincta</i>       | HM180684 | <i>Mitrella bicincta</i>          | correct   | correct   | correct   | correct   | correct   | correct   | <i>Amphissa columbiana</i> |
| <i>Mitrella bicincta</i>       | HM180685 | <i>Mitrella bicincta</i>          | correct   | correct   | correct   | correct   | correct   | correct   | <i>Amphissa columbiana</i> |
| <i>Mitrella bicincta</i>       | HM180687 | <i>Mitrella bicincta</i>          | ambiguous | ambiguous | ambiguous | ambiguous | ambiguous | ambiguous | <i>Amphissa columbiana</i> |
| <i>Mitrella bicincta</i>       | HM180688 | <i>Mitrella bicincta</i>          | ambiguous | ambiguous | ambiguous | ambiguous | ambiguous | ambiguous | <i>Amphissa columbiana</i> |
| <i>Mitrella bicincta</i>       | HM180690 | <i>Mitrella bicincta</i>          | ambiguous | ambiguous | ambiguous | ambiguous | ambiguous | ambiguous | <i>Amphissa columbiana</i> |
| <i>Mitrella bicincta</i>       | HM180691 | <i>Mitrella bicincta</i>          | no id     | no id     | correct   | no id     | no id     | correct   | <i>Amphissa columbiana</i> |
| <i>Mitrella bicincta</i>       | HM180692 | <i>Mitrella bicincta</i>          | ambiguous | ambiguous | ambiguous | ambiguous | ambiguous | ambiguous | <i>Amphissa columbiana</i> |
| <i>Mitrella burchardi</i>      | HQ834098 | <i>Mitrella bicincta</i>          | incorrect | incorrect | incorrect | incorrect | ambiguous | ambiguous | <i>Amphissa columbiana</i> |
| <i>Mitrella burchardi</i>      | JN053028 | <i>Mitrella bicincta</i>          | no id     | ambiguous | ambiguous | no id     | ambiguous | ambiguous | <i>Amphissa columbiana</i> |
| <i>Mizuhopecten yessoensis</i> | GU119990 | <i>Mizuhopecten yessoensis</i>    | no id     | no id     | correct   | no id     | no id     | correct   |                            |
| <i>Mizuhopecten yessoensis</i> | GU119991 | <i>Mizuhopecten yessoensis</i>    | no id     | correct   | correct   | no id     | correct   | correct   |                            |
| <i>Mizuhopecten yessoensis</i> | GU119992 | <i>Mizuhopecten yessoensis</i>    | correct   | correct   | correct   | correct   | correct   | correct   |                            |
| <i>Mizuhopecten yessoensis</i> | GU119993 | <i>Mizuhopecten yessoensis</i>    | correct   | correct   | correct   | correct   | correct   | correct   |                            |
| <i>Mizuhopecten yessoensis</i> | GU119994 | <i>Mizuhopecten yessoensis</i>    | correct   | correct   | correct   | correct   | correct   | correct   |                            |
| <i>Mizuhopecten yessoensis</i> | GU119995 | <i>Mizuhopecten yessoensis</i>    | no id     | correct   | correct   | no id     | correct   | correct   |                            |
| <i>Mizuhopecten yessoensis</i> | GU119996 | <i>Mizuhopecten yessoensis</i>    | no id     | correct   | correct   | no id     | correct   | correct   |                            |
| <i>Mizuhopecten yessoensis</i> | GU119997 | <i>Mizuhopecten yessoensis</i>    | no id     | correct   | correct   | no id     | correct   | correct   |                            |
| <i>Modiolus auriculatus</i>    | GQ480317 | <i>Adipicola crypta</i>           | no id     | no id     | no id     | no id     | no id     | no id     | <i>Modiolus rumphii</i>    |
| <i>Modiolus comptus</i>        | GQ480313 | <i>Modiolus comptus</i>           | ambiguous | ambiguous | ambiguous | ambiguous | ambiguous | ambiguous | <i>Modiolus metcalfei</i>  |
| <i>Modiolus comptus</i>        | GQ480314 | <i>Modiolus comptus</i>           | ambiguous | ambiguous | ambiguous | ambiguous | ambiguous | ambiguous | <i>Modiolus metcalfei</i>  |
| <i>Modiolus comptus</i>        | GQ480315 | <i>Modiolus comptus</i>           | ambiguous | ambiguous | ambiguous | ambiguous | ambiguous | ambiguous | <i>Modiolus metcalfei</i>  |
| <i>Modiolus comptus</i>        | GQ480316 | <i>Modiolus comptus</i>           | ambiguous | ambiguous | ambiguous | ambiguous | ambiguous | ambiguous | <i>Modiolus metcalfei</i>  |
| <i>Modiolus nipponicus</i>     | AB076912 | <i>Modiolus comptus</i>           | incorrect | incorrect | incorrect | incorrect | incorrect | incorrect | <i>Modiolus metcalfei</i>  |
| <i>Modiolus elongatus</i>      | GQ480318 | <i>Bathymodiolus septemdiarum</i> | no id     | no id     | no id     | no id     | no id     | no id     | <i>Micragone tholloni</i>  |
| <i>Modiolus kurilensis</i>     | KP243079 | <i>Modiolus kurilensis</i>        | correct   | correct   | correct   | correct   | correct   | correct   | <i>Modiolus modiolus</i>   |
| <i>Modiolus kurilensis</i>     | KP243078 | <i>Modiolus kurilensis</i>        | correct   | correct   | correct   | correct   | correct   | correct   | <i>Modiolus modiolus</i>   |
| <i>Modiolus kurilensis</i>     | KP243077 | <i>Modiolus kurilensis</i>        | correct   | correct   | correct   | correct   | correct   | correct   | <i>Modiolus modiolus</i>   |
| <i>Modiolus kurilensis</i>     | KP243076 | <i>Modiolus kurilensis</i>        | correct   | correct   | correct   | correct   | correct   | correct   | <i>Modiolus modiolus</i>   |
| <i>Modiolus kurilensis</i>     | KP243075 | <i>Modiolus kurilensis</i>        | no id     | correct   | correct   | no id     | correct   | correct   | <i>Modiolus modiolus</i>   |
| <i>Modiolus kurilensis</i>     | KP243074 | <i>Modiolus kurilensis</i>        | correct   | correct   | correct   | correct   | correct   | correct   | <i>Modiolus modiolus</i>   |

|                              |          |                                |         |         |           |         |         |           |                             |
|------------------------------|----------|--------------------------------|---------|---------|-----------|---------|---------|-----------|-----------------------------|
| <i>Modiolus metcalfei</i>    | GQ480319 | <i>Modiolus metcalfei</i>      | no id   | correct | correct   | no id   | correct | correct   | <i>Modiolus rumphii</i>     |
| <i>Modiolus metcalfei</i>    | GQ480320 | <i>Modiolus metcalfei</i>      | correct | correct | correct   | correct | correct | correct   | <i>Modiolus rumphii</i>     |
| <i>Modiolus metcalfei</i>    | GQ480321 | <i>Modiolus metcalfei</i>      | correct | correct | correct   | correct | correct | correct   | <i>Modiolus rumphii</i>     |
| <i>Modiolus metcalfei</i>    | GQ480322 | <i>Modiolus metcalfei</i>      | correct | correct | correct   | correct | correct | correct   | <i>Modiolus rumphii</i>     |
| <i>Moerella iridescens</i>   | JN859970 | <i>Moerella iridescens</i>     | no id   | no id   | no id     | no id   | no id   | no id     | <i>Moerella iridescens</i>  |
| <i>Monilea smithi</i>        | AB505310 | <i>Monilea smithi</i>          | correct | correct | correct   | correct | correct | correct   | <i>Monilea lentiginosa</i>  |
| <i>Monilea smithi</i>        | AB505311 | <i>Monilea smithi</i>          | correct | correct | correct   | correct | correct | correct   | <i>Monilea lentiginosa</i>  |
| <i>Monodonta australis</i>   | HM180693 | <i>Monodonta australis</i>     | correct | correct | correct   | correct | correct | correct   | <i>Monodonta australis</i>  |
| <i>Monodonta australis</i>   | HM180696 | <i>Monodonta australis</i>     | correct | correct | correct   | correct | correct | correct   | <i>Monodonta australis</i>  |
| <i>Monodonta australis</i>   | HM180694 | <i>Monodonta australis</i>     | correct | correct | correct   | correct | correct | correct   | <i>Monodonta australis</i>  |
| <i>Monodonta australis</i>   | HM180695 | <i>Monodonta australis</i>     | correct | correct | correct   | correct | correct | correct   | <i>Monodonta australis</i>  |
| <i>Monodonta australis</i>   | HM180697 | <i>Monodonta australis</i>     | correct | correct | correct   | correct | correct | correct   | <i>Monodonta australis</i>  |
| <i>Monodonta australis</i>   | HM180698 | <i>Monodonta australis</i>     | correct | correct | correct   | correct | correct | correct   | <i>Monodonta australis</i>  |
| <i>Monodonta australis</i>   | HM180699 | <i>Monodonta australis</i>     | correct | correct | correct   | correct | correct | correct   | <i>Monodonta australis</i>  |
| <i>Monodonta canalifera</i>  | DQ061095 | <i>Monodonta canalifera</i>    | correct | correct | correct   | correct | correct | correct   | <i>Monodonta canalifera</i> |
| <i>Monodonta canalifera</i>  | EU530128 | <i>Monodonta canalifera</i>    | correct | correct | correct   | correct | correct | correct   | <i>Monodonta canalifera</i> |
| <i>Monodonta perplexa</i>    | DQ061096 | <i>Clanculus margaritarius</i> | no id   | no id   | no id     | no id   | no id   | no id     | <i>Monodonta australis</i>  |
| <i>Morula funiculata</i>     | HE584047 | <i>Morula funiculata</i>       | correct | correct | correct   | correct | correct | correct   | <i>Orania pacifica</i>      |
| <i>Morula funiculata</i>     | HE584046 | <i>Morula funiculata</i>       | correct | correct | correct   | correct | correct | correct   | <i>Orania pacifica</i>      |
| <i>Morula funiculata</i>     | HE584045 | <i>Morula funiculata</i>       | correct | correct | correct   | correct | correct | correct   | <i>Orania pacifica</i>      |
| <i>Morula granulata</i>      | JN053032 | <i>Morula granulata</i>        | correct | correct | correct   | correct | correct | correct   | <i>Morula marginalba</i>    |
| <i>Morula granulata</i>      | JN053031 | <i>Morula granulata</i>        | correct | correct | correct   | correct | correct | correct   | <i>Morula marginalba</i>    |
| <i>Morula granulata</i>      | JN053030 | <i>Morula granulata</i>        | correct | correct | correct   | correct | correct | correct   | <i>Morula marginalba</i>    |
| <i>Morula granulata</i>      | JN053029 | <i>Morula granulata</i>        | correct | correct | correct   | correct | correct | correct   | <i>Morula marginalba</i>    |
| <i>Morula japonica</i>       | HE584023 | <i>Littorina kasatka</i>       | no id   | no id   | no id     | no id   | no id   | no id     | <i>Morula sp.</i>           |
| <i>Morula purpureocincta</i> | HE584049 | <i>Morula funiculata</i>       | no id   | no id   | no id     | no id   | no id   | no id     | <i>Morula funiculata</i>    |
| <i>Morula rugosa</i>         | JN053034 | <i>Morula rugosa</i>           | correct | correct | correct   | correct | correct | correct   | <i>Morulaanaxares</i>       |
| <i>Morula rugosa</i>         | JN053033 | <i>Morula rugosa</i>           | correct | correct | correct   | correct | correct | correct   | <i>Morulaanaxares</i>       |
| <i>Morula rumphiusi</i>      | HE584019 | <i>Morula zebrina</i>          | no id   | no id   | incorrect | no id   | no id   | incorrect | <i>Morula rumphiusi</i>     |
| <i>Morula spinosa</i>        | HE584026 | <i>Morula spinosa</i>          | no id   | correct | correct   | no id   | correct | correct   | <i>Thais sp.</i>            |
| <i>Morula spinosa</i>        | HE584025 | <i>Morula spinosa</i>          | no id   | correct | correct   | no id   | correct | correct   | <i>Thais sp.</i>            |

|                                  |          |                                  |           |           |           |           |           |           |                                  |
|----------------------------------|----------|----------------------------------|-----------|-----------|-----------|-----------|-----------|-----------|----------------------------------|
| <i>Morula striata</i>            | HE584028 | <i>Morula striata</i>            | no id     | correct   | correct   | no id     | correct   | correct   | <i>Thais sp.</i>                 |
| <i>Morula striata</i>            | HE584027 | <i>Morula striata</i>            | no id     | correct   | correct   | no id     | correct   | correct   | <i>Morula striata</i>            |
| <i>Morula zebrina</i>            | HE584033 | <i>Morula rumphiusi</i>          | no id     | no id     | incorrect | no id     | no id     | incorrect | <i>Morula rumphiusi</i>          |
| <i>Munditiella ammonoceras</i>   | AM049337 | <i>Munditiella ammonoceras</i>   | no id     | correct   | correct   | no id     | correct   | correct   | <i>Trochus maculatus</i>         |
| <i>Munditiella ammonoceras</i>   | AB365244 | <i>Munditiella ammonoceras</i>   | no id     | correct   | correct   | no id     | correct   | correct   | <i>Trochus maculatus</i>         |
| <i>Murex trapa</i>               | GU188195 | <i>Murex trapa</i>               | correct   | correct   | correct   | correct   | correct   | correct   | <i>Muricidae sp.</i>             |
| <i>Murex trapa</i>               | GU188196 | <i>Murex trapa</i>               | correct   | correct   | correct   | correct   | correct   | correct   | <i>Muricidae sp.</i>             |
| <i>Murex trapa</i>               | GU188197 | <i>Murex trapa</i>               | correct   | correct   | correct   | correct   | correct   | correct   | <i>Muricidae sp.</i>             |
| <i>Murex trapa</i>               | GU188198 | <i>Murex trapa</i>               | correct   | correct   | correct   | correct   | correct   | correct   | <i>Muricidae sp.</i>             |
| <i>Murex trapa</i>               | GU188199 | <i>Murex trapa</i>               | correct   | correct   | correct   | correct   | correct   | correct   | <i>Muricidae sp.</i>             |
| <i>Musculista senhousia</i>      | AB076942 | <i>Musculista senhousia</i>      | correct   | correct   | correct   | correct   | correct   | correct   | <i>Musculista senhousia</i>      |
| <i>Musculista senhousia</i>      | AB498016 | <i>Musculista senhousia</i>      | correct   | correct   | correct   | correct   | correct   | correct   | <i>Musculista senhousia</i>      |
| <i>Mya arenaria</i>              | KJ125420 | <i>Mya arenaria</i>              | no id     | no id     | no id     | no id     | no id     | no id     | <i>Veneroida sp.</i>             |
| <i>Mya arenaria</i>              | KJ125421 | <i>Mya arenaria</i>              | correct   | correct   | correct   | correct   | correct   | correct   | <i>Veneroida sp.</i>             |
| <i>Mytilus coruscus</i>          | GQ480287 | <i>Mytilus galloprovincialis</i> | ambiguous | ambiguous | ambiguous | ambiguous | ambiguous | ambiguous | <i>Mytilus californianus</i>     |
| <i>Mytilus coruscus</i>          | GQ480288 | <i>Mytilus galloprovincialis</i> | ambiguous | ambiguous | ambiguous | ambiguous | ambiguous | ambiguous | <i>Mytilus californianus</i>     |
| <i>Mytilus coruscus</i>          | GQ480289 | <i>Mytilus galloprovincialis</i> | ambiguous | ambiguous | ambiguous | ambiguous | ambiguous | ambiguous | <i>Mytilus californianus</i>     |
| <i>Mytilus coruscus</i>          | GQ480290 | <i>Mytilus galloprovincialis</i> | ambiguous | ambiguous | ambiguous | ambiguous | ambiguous | ambiguous | <i>Mytilus californianus</i>     |
| <i>Mytilus coruscus</i>          | GQ480291 | <i>Mytilus galloprovincialis</i> | ambiguous | ambiguous | ambiguous | ambiguous | ambiguous | ambiguous | <i>Mytilus californianus</i>     |
| <i>Mytilus coruscus</i>          | GQ480295 | <i>Mytilus galloprovincialis</i> | ambiguous | ambiguous | ambiguous | ambiguous | ambiguous | ambiguous | <i>Mytilus californianus</i>     |
| <i>Mytilus coruscus</i>          | GQ480283 | <i>Mytilus galloprovincialis</i> | ambiguous | ambiguous | ambiguous | ambiguous | ambiguous | ambiguous | <i>Mytilus californianus</i>     |
| <i>Mytilus galloprovincialis</i> | HM180705 | <i>Mytilus coruscus</i>          | ambiguous | ambiguous | ambiguous | ambiguous | ambiguous | ambiguous | <i>Mytilus californianus</i>     |
| <i>Mytilus galloprovincialis</i> | HM180706 | <i>Mytilus coruscus</i>          | ambiguous | ambiguous | ambiguous | ambiguous | ambiguous | ambiguous | <i>Mytilus californianus</i>     |
| <i>Mytilus galloprovincialis</i> | HM180707 | <i>Mytilus coruscus</i>          | ambiguous | ambiguous | ambiguous | ambiguous | ambiguous | ambiguous | <i>Mytilus californianus</i>     |
| <i>Mytilus galloprovincialis</i> | HM180708 | <i>Mytilus coruscus</i>          | no id     | ambiguous | ambiguous | no id     | ambiguous | ambiguous | <i>Mytilus californianus</i>     |
| <i>Mytilus galloprovincialis</i> | HM180709 | <i>Mytilus coruscus</i>          | ambiguous | ambiguous | ambiguous | ambiguous | ambiguous | ambiguous | <i>Mytilus californianus</i>     |
| <i>Mytilus galloprovincialis</i> | HM180710 | <i>Mytilus coruscus</i>          | ambiguous | ambiguous | ambiguous | ambiguous | ambiguous | ambiguous | <i>Mytilus californianus</i>     |
| <i>Mytilus galloprovincialis</i> | HM180711 | <i>Mytilus coruscus</i>          | ambiguous | ambiguous | ambiguous | ambiguous | ambiguous | ambiguous | <i>Mytilus californianus</i>     |
| <i>Mytilus galloprovincialis</i> | HM180712 | <i>Mytilus coruscus</i>          | ambiguous | ambiguous | ambiguous | ambiguous | ambiguous | ambiguous | <i>Mytilus californianus</i>     |
| <i>Mytilus galloprovincialis</i> | GQ480281 | <i>Mytilus galloprovincialis</i> | correct   | correct   | correct   | correct   | ambiguous | ambiguous | <i>Mytilus galloprovincialis</i> |
| <i>Mytilus galloprovincialis</i> | GQ480282 | <i>Mytilus galloprovincialis</i> | no id     | correct   | correct   | no id     | correct   | ambiguous | <i>Mytilus galloprovincialis</i> |

|                                  |          |                                  |         |           |           |         |           |           |                                  |
|----------------------------------|----------|----------------------------------|---------|-----------|-----------|---------|-----------|-----------|----------------------------------|
| <i>Mytilus galloprovincialis</i> | GQ480284 | <i>Mytilus galloprovincialis</i> | correct | correct   | correct   | correct | correct   | ambiguous | <i>Mytilus galloprovincialis</i> |
| <i>Mytilus galloprovincialis</i> | GQ480285 | <i>Mytilus galloprovincialis</i> | correct | correct   | correct   | correct | ambiguous | ambiguous | <i>Mytilus galloprovincialis</i> |
| <i>Mytilus galloprovincialis</i> | GQ480286 | <i>Mytilus galloprovincialis</i> | correct | correct   | correct   | correct | ambiguous | ambiguous | <i>Mytilus galloprovincialis</i> |
| <i>Mytilus galloprovincialis</i> | GQ480292 | <i>Mytilus galloprovincialis</i> | correct | correct   | correct   | correct | ambiguous | ambiguous | <i>Mytilus galloprovincialis</i> |
| <i>Mytilus galloprovincialis</i> | GQ480293 | <i>Mytilus galloprovincialis</i> | correct | correct   | correct   | correct | correct   | ambiguous | <i>Mytilus galloprovincialis</i> |
| <i>Mytilus galloprovincialis</i> | GQ480294 | <i>Mytilus galloprovincialis</i> | correct | correct   | correct   | correct | ambiguous | ambiguous | <i>Mytilus galloprovincialis</i> |
| <i>Mytilus edulis</i>            | HM180704 | <i>Mytilus galloprovincialis</i> | no id   | incorrect | incorrect | no id   | incorrect | incorrect | <i>Mytilus galloprovincialis</i> |
| <i>Nassarius conoidalis</i>      | JQ975567 | <i>Nassarius conoidalis</i>      | correct | correct   | correct   | correct | ambiguous | ambiguous | <i>Nassarius sp.</i>             |
| <i>Nassarius conoidalis</i>      | JQ975566 | <i>Nassarius conoidalis</i>      | correct | correct   | correct   | correct | ambiguous | ambiguous | <i>Nassarius sp.</i>             |
| <i>Nassarius conoidalis</i>      | JQ975565 | <i>Nassarius conoidalis</i>      | correct | correct   | correct   | correct | ambiguous | ambiguous | <i>Nassarius sp.</i>             |
| <i>Nassarius dorsatus</i>        | JQ975553 | <i>Nassarius dorsatus</i>        | correct | correct   | correct   | correct | correct   | correct   | <i>Nassarius sp.</i>             |
| <i>Nassarius dorsatus</i>        | JQ975554 | <i>Nassarius dorsatus</i>        | correct | correct   | correct   | correct | correct   | correct   | <i>Nassarius sp.</i>             |
| <i>Nassarius festivus</i>        | JQ975456 | <i>Nassarius festivus</i>        | correct | correct   | correct   | correct | correct   | correct   | <i>Nassarius festivus</i>        |
| <i>Nassarius festivus</i>        | JQ975460 | <i>Nassarius festivus</i>        | no id   | correct   | correct   | no id   | correct   | correct   | <i>Nassarius festivus</i>        |
| <i>Nassarius festivus</i>        | JQ975459 | <i>Nassarius festivus</i>        | correct | correct   | correct   | correct | correct   | correct   | <i>Nassarius festivus</i>        |
| <i>Nassarius festivus</i>        | JQ975458 | <i>Nassarius festivus</i>        | correct | correct   | correct   | correct | correct   | correct   | <i>Nassarius festivus</i>        |
| <i>Nassarius festivus</i>        | JQ975457 | <i>Nassarius festivus</i>        | correct | correct   | correct   | correct | correct   | correct   | <i>Nassarius festivus</i>        |
| <i>Nassarius festivus</i>        | JQ975455 | <i>Nassarius festivus</i>        | correct | correct   | correct   | correct | correct   | correct   | <i>Nassarius festivus</i>        |
| <i>Nassarius hepaticus</i>       | JQ975487 | <i>Nassarius hepaticus</i>       | correct | correct   | correct   | correct | correct   | correct   | <i>Nassarius fulgurans</i>       |
| <i>Nassarius hepaticus</i>       | JQ975491 | <i>Nassarius hepaticus</i>       | correct | correct   | correct   | correct | correct   | correct   | <i>Nassarius fulgurans</i>       |
| <i>Nassarius hepaticus</i>       | JQ975490 | <i>Nassarius hepaticus</i>       | correct | correct   | correct   | correct | correct   | correct   | <i>Nassarius fulgurans</i>       |
| <i>Nassarius hepaticus</i>       | JQ975489 | <i>Nassarius hepaticus</i>       | correct | correct   | correct   | correct | correct   | correct   | <i>Nassarius fulgurans</i>       |
| <i>Nassarius hepaticus</i>       | JQ975488 | <i>Nassarius hepaticus</i>       | correct | correct   | correct   | correct | correct   | correct   | <i>Nassarius fulgurans</i>       |
| <i>Nassarius hepaticus</i>       | JQ975486 | <i>Nassarius hepaticus</i>       | correct | correct   | correct   | correct | correct   | correct   | <i>Nassarius fulgurans</i>       |
| <i>Nassarius livescens</i>       | JQ975514 | <i>Nassarius livescens</i>       | no id   | no id     | correct   | no id   | no id     | correct   | <i>Nassarius livescens</i>       |
| <i>Nassarius livescens</i>       | JQ975515 | <i>Nassarius livescens</i>       | correct | correct   | correct   | correct | correct   | correct   | <i>Nassarius livescens</i>       |
| <i>Nassarius livescens</i>       | JQ975516 | <i>Nassarius livescens</i>       | correct | correct   | correct   | correct | correct   | correct   | <i>Nassarius livescens</i>       |
| <i>Nassarius livescens</i>       | JQ975517 | <i>Nassarius livescens</i>       | correct | correct   | correct   | correct | correct   | correct   | <i>Nassarius livescens</i>       |
| <i>Nassarius pullus</i>          | JQ975561 | <i>Nassarius pullus</i>          | correct | correct   | correct   | correct | correct   | correct   | <i>Nassarius sp.</i>             |
| <i>Nassarius pullus</i>          | JQ975560 | <i>Nassarius pullus</i>          | correct | correct   | correct   | correct | correct   | correct   | <i>Nassarius sp.</i>             |
| <i>Nassarius pullus</i>          | JQ975559 | <i>Nassarius pullus</i>          | correct | correct   | correct   | correct | correct   | correct   | <i>Nassarius sp.</i>             |

|                                |          |                                |           |           |           |           |           |           |           |                                |
|--------------------------------|----------|--------------------------------|-----------|-----------|-----------|-----------|-----------|-----------|-----------|--------------------------------|
| <i>Nassarius pullus</i>        | JQ975558 | <i>Nassarius pullus</i>        | correct   | correct   | correct   | correct   | correct   | correct   | correct   | <i>Nassarius sp.</i>           |
| <i>Nassarius pullus</i>        | JQ975557 | <i>Nassarius pullus</i>        | correct   | correct   | correct   | correct   | correct   | correct   | correct   | <i>Nassarius sp.</i>           |
| <i>Nassarius pullus</i>        | JQ975556 | <i>Nassarius pullus</i>        | correct   | correct   | correct   | correct   | correct   | correct   | correct   | <i>Nassarius sp.</i>           |
| <i>Nassarius pullus</i>        | JQ975555 | <i>Nassarius pullus</i>        | correct   | correct   | correct   | correct   | correct   | correct   | correct   | <i>Nassarius sp.</i>           |
| <i>Nassarius semiplicatus</i>  | JQ975564 | <i>Nassarius semiplicatus</i>  | correct   | correct   | correct   | correct   | correct   | correct   | correct   | <i>Nassarius sp.</i>           |
| <i>Nassarius semiplicatus</i>  | JQ975563 | <i>Nassarius semiplicatus</i>  | correct   | correct   | correct   | correct   | correct   | correct   | correct   | <i>Nassarius sp.</i>           |
| <i>Nassarius siquijorensis</i> | JQ975552 | <i>Nassarius siquijorensis</i> | correct   | correct   | correct   | correct   | correct   | correct   | ambiguous | <i>Nassarius canaliculatus</i> |
| <i>Nassarius siquijorensis</i> | HQ834076 | <i>Nassarius siquijorensis</i> | correct   | correct   | correct   | correct   | correct   | correct   | ambiguous | <i>Nassarius canaliculatus</i> |
| <i>Nassarius siquijorensis</i> | JN053047 | <i>Nassarius conoidalis</i>    | no id     | incorrect | incorrect | no id     | incorrect | ambiguous | ambiguous | <i>Nassarius canaliculatus</i> |
| <i>Natica lineata</i>          | JF693401 | <i>Natica lineata</i>          | correct   | correct   | correct   | correct   | correct   | correct   | correct   | <i>Naticidae sp.</i>           |
| <i>Natica lineata</i>          | JF693402 | <i>Natica lineata</i>          | correct   | correct   | correct   | correct   | correct   | correct   | correct   | <i>Naticidae sp.</i>           |
| <i>Natica lineata</i>          | JF693404 | <i>Natica lineata</i>          | correct   | correct   | correct   | correct   | correct   | correct   | correct   | <i>Naticidae sp.</i>           |
| <i>Natica lineata</i>          | JF693403 | <i>Natica lineata</i>          | correct   | correct   | correct   | correct   | correct   | correct   | correct   | <i>Naticidae sp.</i>           |
| <i>Natica tigrina</i>          | JF693400 | <i>Drupella fragum</i>         | no id     | no id     | no id     | no id     | no id     | no id     | no id     | <i>Cryptonatica aleutica</i>   |
| <i>Neptunea arthritica</i>     | AB498778 | <i>Neptunea cumingi</i>        | ambiguous | ambiguous | ambiguous | ambiguous | ambiguous | ambiguous | ambiguous | <i>Neptunea cumingi</i>        |
| <i>Neptunea arthritica</i>     | AB498777 | <i>Neptunea cumingi</i>        | ambiguous | ambiguous | ambiguous | ambiguous | ambiguous | ambiguous | ambiguous | <i>Neptunea cumingi</i>        |
| <i>Neptunea arthritica</i>     | AB498776 | <i>Neptunea cumingi</i>        | ambiguous | ambiguous | ambiguous | ambiguous | ambiguous | ambiguous | ambiguous | <i>Neptunea cumingi</i>        |
| <i>Neptunea constricta</i>     | AB498766 | <i>Neptunea polycostata</i>    | no id     | no id     | incorrect | no id     | no id     | incorrect | incorrect | <i>Neptunea constricta</i>     |
| <i>Ocenebrellus inornatus</i>  | HM180491 | <i>Neptunea cumingi</i>        | ambiguous | ambiguous | ambiguous | ambiguous | ambiguous | ambiguous | ambiguous | <i>Neptunea cumingi</i>        |
| <i>Ocenebrellus inornatus</i>  | HM180492 | <i>Neptunea cumingi</i>        | ambiguous | ambiguous | ambiguous | ambiguous | ambiguous | ambiguous | ambiguous | <i>Neptunea cumingi</i>        |
| <i>Ocenebrellus inornatus</i>  | HM180493 | <i>Neptunea cumingi</i>        | ambiguous | ambiguous | ambiguous | ambiguous | ambiguous | ambiguous | ambiguous | <i>Neptunea cumingi</i>        |
| <i>Neptunea cumingi</i>        | HQ834061 | <i>Neptunea cumingi</i>        | ambiguous | ambiguous | ambiguous | ambiguous | ambiguous | ambiguous | ambiguous | <i>Neptunea cumingi</i>        |
| <i>Neptunea cumingi</i>        | JN053006 | <i>Neptunea cumingi</i>        | ambiguous | ambiguous | ambiguous | ambiguous | ambiguous | ambiguous | ambiguous | <i>Neptunea cumingi</i>        |
| <i>Neptunea cumingi</i>        | JN053005 | <i>Neptunea cumingi</i>        | ambiguous | ambiguous | ambiguous | ambiguous | ambiguous | ambiguous | ambiguous | <i>Neptunea cumingi</i>        |
| <i>Neptunea cumingi</i>        | HM180715 | <i>Neptunea cumingi</i>        | ambiguous | ambiguous | ambiguous | ambiguous | ambiguous | ambiguous | ambiguous | <i>Neptunea arthritica</i>     |
| <i>Neptunea cumingi</i>        | HM180716 | <i>Neptunea cumingi</i>        | ambiguous | ambiguous | ambiguous | ambiguous | ambiguous | ambiguous | ambiguous | <i>Neptunea arthritica</i>     |
| <i>Neptunea kuroshio</i>       | AB498772 | <i>Neptunea frater</i>         | no id     | incorrect | incorrect | no id     | incorrect | incorrect | incorrect | <i>Neptunea mikawaensis</i>    |
| <i>Neptunea frater</i>         | AB498769 | <i>Neptunea kuroshio</i>       | no id     | incorrect | incorrect | no id     | ambiguous | ambiguous | ambiguous | <i>Neptunea mikawaensis</i>    |
| <i>Neptunea frater</i>         | AB498768 | <i>Neptunea frater</i>         | correct   | correct   | correct   | correct   | correct   | correct   | ambiguous | <i>Neptunea mikawaensis</i>    |
| <i>Neptunea frater</i>         | AB498767 | <i>Neptunea frater</i>         | correct   | correct   | correct   | correct   | correct   | correct   | ambiguous | <i>Neptunea mikawaensis</i>    |
| <i>Neptunea intersculpta</i>   | AB498771 | <i>Neptunea intersculpta</i>   | correct   | correct   | correct   | correct   | correct   | correct   | correct   | <i>Neptunea polycostata</i>    |

|                              |          |                                 |         |         |           |         |         |           |                              |
|------------------------------|----------|---------------------------------|---------|---------|-----------|---------|---------|-----------|------------------------------|
| <i>Neptunea intersculpta</i> | AB498770 | <i>Neptunea intersculpta</i>    | correct | correct | correct   | correct | correct | correct   | <i>Neptunea polycostata</i>  |
| <i>Neptunea mikawaensis</i>  | AB498773 | <i>Neptunea kuroshio</i>        | no id   | no id   | incorrect | no id   | no id   | incorrect | <i>Neptunea kuroshio</i>     |
| <i>Neptunea polycostata</i>  | AB498775 | <i>Neptunea polycostata</i>     | correct | correct | correct   | correct | correct | ambiguous | <i>Neptunea intersculpta</i> |
| <i>Neptunea polycostata</i>  | AB498774 | <i>Neptunea polycostata</i>     | correct | correct | correct   | correct | correct | ambiguous | <i>Neptunea intersculpta</i> |
| <i>Nerita albicilla</i>      | AM049327 | <i>Nerita yoldii</i>            | no id   | no id   | no id     | no id   | no id   | no id     | <i>Nerita albicilla</i>      |
| <i>Nerita helicinoides</i>   | EU732252 | <i>Nerita helicinoides</i>      | no id   | no id   | correct   | no id   | no id   | correct   | <i>Nerita helicinoides</i>   |
| <i>Nerita helicinoides</i>   | EU732251 | <i>Nerita helicinoides</i>      | no id   | no id   | correct   | no id   | no id   | correct   | <i>Nerita helicinoides</i>   |
| <i>Nerita japonica</i>       | EU732260 | <i>Nerita japonica</i>          | correct | correct | correct   | correct | correct | ambiguous | <i>Nerita yoldii</i>         |
| <i>Nerita japonica</i>       | EU732259 | <i>Nerita japonica</i>          | correct | correct | correct   | correct | correct | ambiguous | <i>Nerita yoldii</i>         |
| <i>Nerita ocellata</i>       | EU732280 | <i>Nerita ocellata</i>          | no id   | correct | correct   | no id   | correct | correct   | <i>Nerita argus</i>          |
| <i>Nerita ocellata</i>       | EU732279 | <i>Nerita ocellata</i>          | no id   | correct | correct   | no id   | correct | correct   | <i>Nerita argus</i>          |
| <i>Nerita planospira</i>     | EU732291 | <i>Nerita japonica</i>          | no id   | no id   | no id     | no id   | no id   | no id     | <i>Nerita adenensis</i>      |
| <i>Nerita plicata</i>        | EU732293 | <i>Nerita yoldii</i>            | no id   | no id   | no id     | no id   | no id   | no id     | <i>Nerita plicata</i>        |
| <i>Nerita tristis</i>        | EU732324 | <i>Nerita tristis</i>           | correct | correct | correct   | correct | correct | correct   | <i>Nerita undata</i>         |
| <i>Nerita tristis</i>        | EU732323 | <i>Nerita tristis</i>           | correct | correct | correct   | correct | correct | correct   | <i>Nerita undata</i>         |
| <i>Nerita undata</i>         | EU732333 | <i>Nerita undata</i>            | correct | correct | correct   | correct | correct | correct   | <i>Nerita undata</i>         |
| <i>Nerita undata</i>         | EU732334 | <i>Nerita undata</i>            | correct | correct | correct   | correct | correct | correct   | <i>Nerita undata</i>         |
| <i>Nerita undata</i>         | EU732336 | <i>Nerita undata</i>            | correct | correct | correct   | correct | correct | correct   | <i>Nerita undata</i>         |
| <i>Nerita undata</i>         | EU732335 | <i>Nerita undata</i>            | correct | correct | correct   | correct | correct | correct   | <i>Nerita undata</i>         |
| <i>Nerita undulata</i>       | EU732352 | <i>Nerita undulata</i>          | correct | correct | correct   | correct | correct | correct   | <i>Nerita undata</i>         |
| <i>Nerita undulata</i>       | EU732351 | <i>Nerita undulata</i>          | correct | correct | correct   | correct | correct | correct   | <i>Nerita undata</i>         |
| <i>Nerita yoldii</i>         | EU732359 | <i>Nerita yoldii</i>            | no id   | correct | correct   | no id   | correct | correct   | <i>Nerita japonica</i>       |
| <i>Nerita yoldii</i>         | EU732360 | <i>Nerita yoldii</i>            | no id   | correct | correct   | no id   | correct | correct   | <i>Nerita japonica</i>       |
| <i>Neritilia littoralis</i>  | AB102710 | <i>Cerithidea djadjariensis</i> | no id   | no id   | no id     | no id   | no id   | no id     | <i>Neritilia cavernicola</i> |
| <i>Neritilia mimotoi</i>     | AB102711 | <i>Nassarius pullus</i>         | no id   | no id   | no id     | no id   | no id   | no id     | <i>Neritilia cavernicola</i> |
| <i>Neritilia rubida</i>      | AB102712 | <i>Neritina petittii</i>        | no id   | no id   | no id     | no id   | no id   | no id     | <i>Neritilia cavernicola</i> |
| <i>Neritina asperulata</i>   | AB477474 | <i>Neritina asperulata</i>      | correct | correct | correct   | correct | correct | correct   | <i>Neritina asperulata</i>   |
| <i>Neritina asperulata</i>   | AB477473 | <i>Neritina asperulata</i>      | correct | correct | correct   | correct | correct | correct   | <i>Neritina asperulata</i>   |
| <i>Neritina asperulata</i>   | AB477472 | <i>Neritina asperulata</i>      | correct | correct | correct   | correct | correct | correct   | <i>Neritina asperulata</i>   |
| <i>Neritina iris</i>         | AB477491 | <i>Neritina iris</i>            | correct | correct | correct   | correct | correct | correct   | <i>Neritina canalis</i>      |
| <i>Neritina iris</i>         | AB477490 | <i>Neritina iris</i>            | correct | correct | correct   | correct | correct | correct   | <i>Neritina canalis</i>      |



|                                 |          |                                 |           |           |           |           |           |           |           |                                 |
|---------------------------------|----------|---------------------------------|-----------|-----------|-----------|-----------|-----------|-----------|-----------|---------------------------------|
| <i>Neritina petiti</i>          | AB477497 | <i>Neritina petiti</i>          | correct   | correct   | correct   | correct   | correct   | correct   | correct   | <i>Neritina sp.</i>             |
| <i>Neritina petiti</i>          | AB477496 | <i>Neritina petiti</i>          | correct   | correct   | correct   | correct   | correct   | correct   | correct   | <i>Neritina sp.</i>             |
| <i>Neritina petiti</i>          | AB477495 | <i>Neritina petiti</i>          | correct   | correct   | correct   | correct   | correct   | correct   | correct   | <i>Neritina sp.</i>             |
| <i>Neritina pulligera</i>       | AB477502 | <i>Neritina pulligera</i>       | correct   | correct   | correct   | correct   | correct   | correct   | correct   | <i>Neritina canalis</i>         |
| <i>Neritina pulligera</i>       | AB477501 | <i>Neritina pulligera</i>       | correct   | correct   | correct   | correct   | correct   | correct   | correct   | <i>Neritina canalis</i>         |
| <i>Nipponacmea fuscoviridis</i> | KF953455 | <i>Nipponacmea fuscoviridis</i> | no id     | correct   | correct   | no id     | correct   | correct   | correct   | <i>Nipponacmea fuscoviridis</i> |
| <i>Nipponacmea fuscoviridis</i> | KF953456 | <i>Nipponacmea fuscoviridis</i> | correct   | correct   | correct   | correct   | correct   | correct   | correct   | <i>Nipponacmea fuscoviridis</i> |
| <i>Nipponacmea fuscoviridis</i> | KF953457 | <i>Nipponacmea fuscoviridis</i> | correct   | correct   | correct   | correct   | correct   | correct   | correct   | <i>Nipponacmea fuscoviridis</i> |
| <i>Nipponacmea fuscoviridis</i> | KF953458 | <i>Nipponacmea fuscoviridis</i> | correct   | correct   | correct   | correct   | correct   | correct   | correct   | <i>Nipponacmea fuscoviridis</i> |
| <i>Nipponacmea fuscoviridis</i> | KF953459 | <i>Nipponacmea fuscoviridis</i> | correct   | correct   | correct   | correct   | correct   | correct   | correct   | <i>Nipponacmea fuscoviridis</i> |
| <i>Nipponacmea gloriosa</i>     | AB238488 | <i>Patelloida signata</i>       | no id     | incorrect | incorrect | no id     | incorrect | incorrect | incorrect | <i>Patelloida signata</i>       |
| <i>Nipponacmea habei</i>        | AB238489 | <i>Lottia luchuana</i>          | no id     | no id     | no id     | no id     | no id     | no id     | no id     | <i>Nipponacmea teramachii</i>   |
| <i>Nipponacmea concinna</i>     | KM221103 | <i>Nipponacmea nigrans</i>      | incorrect | incorrect | incorrect | incorrect | incorrect | incorrect | incorrect | <i>Nipponacmea moskalevi</i>    |
| <i>Nipponacmea nigrans</i>      | KF953202 | <i>Nipponacmea nigrans</i>      | ambiguous | ambiguous | ambiguous | ambiguous | ambiguous | ambiguous | ambiguous | <i>Nipponacmea moskalevi</i>    |
| <i>Nipponacmea nigrans</i>      | KF953204 | <i>Nipponacmea nigrans</i>      | ambiguous | ambiguous | ambiguous | ambiguous | ambiguous | ambiguous | ambiguous | <i>Nipponacmea moskalevi</i>    |
| <i>Nipponacmea nigrans</i>      | KF953205 | <i>Nipponacmea nigrans</i>      | ambiguous | ambiguous | ambiguous | ambiguous | ambiguous | ambiguous | ambiguous | <i>Nipponacmea moskalevi</i>    |
| <i>Nipponacmea nigrans</i>      | KF953206 | <i>Nipponacmea nigrans</i>      | ambiguous | ambiguous | ambiguous | ambiguous | ambiguous | ambiguous | ambiguous | <i>Nipponacmea moskalevi</i>    |
| <i>Nipponacmea nigrans</i>      | KF953207 | <i>Nipponacmea nigrans</i>      | ambiguous | ambiguous | ambiguous | ambiguous | ambiguous | ambiguous | ambiguous | <i>Nipponacmea moskalevi</i>    |
| <i>Nipponacmea nigrans</i>      | AB238490 | <i>Nipponacmea nigrans</i>      | no id     | no id     | no id     | no id     | no id     | no id     | no id     | <i>Nipponacmea moskalevi</i>    |
| <i>Nipponacmea radula</i>       | KF953288 | <i>Nipponacmea schrenckii</i>   | ambiguous | ambiguous | ambiguous | ambiguous | ambiguous | ambiguous | ambiguous | <i>Nipponacmea schrenckii</i>   |
| <i>Nipponacmea radula</i>       | KF953289 | <i>Nipponacmea schrenckii</i>   | ambiguous | ambiguous | ambiguous | ambiguous | ambiguous | ambiguous | ambiguous | <i>Nipponacmea schrenckii</i>   |
| <i>Nipponacmea radula</i>       | KF953290 | <i>Nipponacmea schrenckii</i>   | ambiguous | ambiguous | ambiguous | ambiguous | ambiguous | ambiguous | ambiguous | <i>Nipponacmea schrenckii</i>   |
| <i>Nipponacmea radula</i>       | KF953291 | <i>Nipponacmea schrenckii</i>   | ambiguous | ambiguous | ambiguous | ambiguous | ambiguous | ambiguous | ambiguous | <i>Nipponacmea schrenckii</i>   |
| <i>Nipponacmea radula</i>       | KF953292 | <i>Nipponacmea schrenckii</i>   | ambiguous | ambiguous | ambiguous | ambiguous | ambiguous | ambiguous | ambiguous | <i>Nipponacmea schrenckii</i>   |
| <i>Nipponacmea radula</i>       | AB238491 | <i>Nipponacmea schrenckii</i>   | ambiguous | ambiguous | ambiguous | ambiguous | ambiguous | ambiguous | ambiguous | <i>Nipponacmea schrenckii</i>   |
| <i>Nipponacmea schrenckii</i>   | KM221040 | <i>Nipponacmea radula</i>       | ambiguous | ambiguous | ambiguous | ambiguous | ambiguous | ambiguous | ambiguous | <i>Nipponacmea schrenckii</i>   |
| <i>Nipponacmea schrenckii</i>   | KM221114 | <i>Nipponacmea radula</i>       | ambiguous | ambiguous | ambiguous | ambiguous | ambiguous | ambiguous | ambiguous | <i>Nipponacmea schrenckii</i>   |
| <i>Nipponacmea schrenckii</i>   | KM221128 | <i>Nipponacmea radula</i>       | ambiguous | ambiguous | ambiguous | ambiguous | ambiguous | ambiguous | ambiguous | <i>Nipponacmea schrenckii</i>   |
| <i>Nipponacmea schrenckii</i>   | KM221130 | <i>Nipponacmea radula</i>       | ambiguous | ambiguous | ambiguous | ambiguous | ambiguous | ambiguous | ambiguous | <i>Nipponacmea schrenckii</i>   |
| <i>Nipponacmea schrenckii</i>   | KM221131 | <i>Nipponacmea radula</i>       | ambiguous | ambiguous | ambiguous | ambiguous | ambiguous | ambiguous | ambiguous | <i>Nipponacmea schrenckii</i>   |
| <i>Nipponacmea schrenckii</i>   | KM221123 | <i>Nipponacmea radula</i>       | ambiguous | ambiguous | ambiguous | ambiguous | ambiguous | ambiguous | ambiguous | <i>Nipponacmea schrenckii</i>   |

|                               |          |                                       |         |         |           |         |         |           |                               |
|-------------------------------|----------|---------------------------------------|---------|---------|-----------|---------|---------|-----------|-------------------------------|
| <i>Nipponacmea teramachii</i> | AB238493 | <i>Lottia tenuisculpta</i>            | no id   | no id   | no id     | no id   | no id   | no id     | <i>Nipponacmea habeii</i>     |
| <i>Nucella freycinetii</i>    | AB743761 | <i>Nucella freycinetii</i>            | correct | correct | correct   | correct | correct | correct   |                               |
| <i>Nucella freycinetii</i>    | AB743760 | <i>Nucella freycinetii</i>            | correct | correct | correct   | correct | correct | correct   |                               |
| <i>Nucella freycinetii</i>    | AB743759 | <i>Nucella freycinetii</i>            | correct | correct | correct   | correct | correct | correct   |                               |
| <i>Nucella freycinetii</i>    | AB743758 | <i>Nucella freycinetii</i>            | correct | correct | correct   | correct | correct | correct   |                               |
| <i>Nucella freycinetii</i>    | AB743757 | <i>Nucella freycinetii</i>            | correct | correct | correct   | correct | correct | correct   |                               |
| <i>Nucella freycinetii</i>    | AB743756 | <i>Nucella freycinetii</i>            | correct | correct | correct   | correct | correct | correct   |                               |
| <i>Octopus conispadiceus</i>  | AB430532 | <i>Octopus vulgaris</i>               | no id   | no id   | no id     | no id   | no id   | no id     | <i>Octopus sp.</i>            |
| <i>Octopus cyanea</i>         | AB430535 | <i>Octopus cyanea</i>                 | correct | correct | correct   | correct | correct | correct   | <i>Octopus sp.</i>            |
| <i>Octopus cyanea</i>         | AB430534 | <i>Octopus cyanea</i>                 | correct | correct | correct   | correct | correct | correct   | <i>Octopus sp.</i>            |
| <i>Octopus incella</i>        | AB430542 | <i>Octopus nanhaiensis</i>            | no id   | no id   | no id     | no id   | no id   | no id     | <i>Octopus rubescens</i>      |
| <i>Octopus longispadiceus</i> | AB430539 | <i>Sepia subtenuipes</i>              | no id   | no id   | no id     | no id   | no id   | no id     | <i>Octopus rubescens</i>      |
| <i>Octopus laqueus</i>        | AB430543 | <i>Octopus cyanea</i>                 | no id   | no id   | no id     | no id   | no id   | no id     | <i>Octopus cf. bocki</i>      |
| <i>Octopus nanhaiensis</i>    | HQ846121 | <i>Octopus incella</i>                | no id   | no id   | no id     | no id   | no id   | no id     | <i>Octopus cf. bocki</i>      |
| <i>Octopus oliveri</i>        | AB430533 | <i>Sepia subtenuipes</i>              | no id   | no id   | incorrect | no id   | no id   | incorrect | <i>Sepia subtenuipes</i>      |
| <i>Octopus parvus</i>         | AB430544 | <i>Octopus wolfi</i>                  | no id   | no id   | no id     | no id   | no id   | no id     | <i>Octopodidae sp.</i>        |
| <i>Octopus tankahkeei</i>     | JX456264 | <i>Cistopus taiwanicus</i>            | no id   | no id   | no id     | no id   | no id   | no id     | <i>Cistopus taiwanicus</i>    |
| <i>Octopus vulgaris</i>       | HQ846110 | <i>Octopus vulgaris</i>               | correct | correct | correct   | correct | correct | correct   | <i>Octopus vulgaris</i>       |
| <i>Octopus vulgaris</i>       | HQ846154 | <i>Octopus vulgaris</i>               | correct | correct | correct   | correct | correct | correct   | <i>Octopus vulgaris</i>       |
| <i>Octopus vulgaris</i>       | JX456270 | <i>Octopus vulgaris</i>               | correct | correct | correct   | correct | correct | correct   | <i>Octopus vulgaris</i>       |
| <i>Octopus vulgaris</i>       | AB430547 | <i>Octopus vulgaris</i>               | correct | correct | correct   | correct | correct | correct   | <i>Octopus vulgaris</i>       |
| <i>Octopus vulgaris</i>       | AB430546 | <i>Octopus vulgaris</i>               | correct | correct | correct   | correct | correct | correct   | <i>Octopus vulgaris</i>       |
| <i>Octopus oshimai</i>        | JX456268 | <i>Octopus vulgaris</i>               | no id   | no id   | no id     | no id   | no id   | no id     | <i>Octopus vulgaris</i>       |
| <i>Octopus wolfi</i>          | AB430545 | <i>Octopus longispadiceus</i>         | no id   | no id   | no id     | no id   | no id   | no id     | <i>Octopoda sp.</i>           |
| <i>Omphalius pfeifferi</i>    | HM180730 | <i>Omphalius pfeifferi carpenteri</i> | correct | correct | correct   | correct | correct | correct   | <i>Chlorostoma turbinatum</i> |
| <i>Omphalius pfeifferi</i>    | HM180731 | <i>Omphalius pfeifferi carpenteri</i> | correct | correct | correct   | correct | correct | correct   | <i>Chlorostoma turbinatum</i> |
| <i>Ostrea stentina</i>        | LC051588 | <i>Ostrea stentina</i>                | correct | correct | correct   | correct | correct | correct   | <i>Ostreola stentina</i>      |
| <i>Ostrea stentina</i>        | LC051586 | <i>Ostrea stentina</i>                | correct | correct | correct   | correct | correct | correct   | <i>Ostreola stentina</i>      |
| <i>Ostrea stentina</i>        | LC051585 | <i>Ostrea stentina</i>                | no id   | correct | correct   | no id   | correct | correct   | <i>Ostreola stentina</i>      |
| <i>Ostrea stentina</i>        | LC051589 | <i>Ostrea stentina</i>                | correct | correct | correct   | correct | correct | correct   | <i>Ostreola stentina</i>      |
| <i>Ostrea stentina</i>        | LC051587 | <i>Ostrea stentina</i>                | correct | correct | correct   | correct | correct | correct   | <i>Ostreola stentina</i>      |





|                              |          |                              |           |           |           |           |           |           |                                  |
|------------------------------|----------|------------------------------|-----------|-----------|-----------|-----------|-----------|-----------|----------------------------------|
| <i>Paphia sinuosa</i>        | JQ277815 | <i>Paphia sinuosa</i>        | no id     | no id     | no id     | no id     | no id     | no id     | <i>Paphia sinuosa</i>            |
| <i>Paphia textile</i>        | HQ703236 | <i>Paphia textile</i>        | correct   | correct   | correct   | correct   | correct   | correct   | <i>Paphia textile</i>            |
| <i>Paphia textile</i>        | HQ703237 | <i>Paphia textile</i>        | ambiguous | ambiguous | ambiguous | ambiguous | ambiguous | ambiguous | <i>Paphia textile</i>            |
| <i>Paphia textile</i>        | JN898938 | <i>Paphia textile</i>        | no id     | ambiguous | ambiguous | no id     | ambiguous | ambiguous | <i>Paphia textile</i>            |
| <i>Paphia undulata</i>       | HM124591 | <i>Paphia undulata</i>       | incorrect | incorrect | incorrect | incorrect | incorrect | incorrect | <i>Paphia textile</i>            |
| <i>Paphia undulata</i>       | HQ703244 | <i>Paphia undulata</i>       | correct   | correct   | correct   | correct   | correct   | correct   | <i>Paphia textile</i>            |
| <i>Paphia undulata</i>       | HQ703245 | <i>Paphia undulata</i>       | correct   | correct   | correct   | correct   | correct   | correct   | <i>Paphia textile</i>            |
| <i>Paphia undulata</i>       | HQ703246 | <i>Paphia undulata</i>       | correct   | correct   | correct   | correct   | correct   | correct   | <i>Paphia textile</i>            |
| <i>Paphia undulata</i>       | HQ703247 | <i>Paphia undulata</i>       | correct   | correct   | correct   | correct   | correct   | correct   | <i>Paphia textile</i>            |
| <i>Paphia undulata</i>       | HQ703248 | <i>Paphia undulata</i>       | correct   | correct   | correct   | correct   | correct   | correct   | <i>Paphia textile</i>            |
| <i>Paphia undulata</i>       | GQ855244 | <i>Paphia undulata</i>       | correct   | correct   | correct   | correct   | correct   | correct   | <i>Paphia textile</i>            |
| <i>Paphia undulata</i>       | GQ855245 | <i>Paphia undulata</i>       | correct   | correct   | correct   | correct   | correct   | correct   | <i>Paphia textile</i>            |
| <i>Paphia undulata</i>       | GQ855246 | <i>Paphia undulata</i>       | correct   | correct   | correct   | correct   | correct   | correct   | <i>Paphia textile</i>            |
| <i>Paphia undulata</i>       | GQ855247 | <i>Paphia undulata</i>       | correct   | correct   | correct   | correct   | correct   | correct   | <i>Paphia textile</i>            |
| <i>Paphia undulata</i>       | JN898933 | <i>Paphia undulata</i>       | correct   | correct   | correct   | correct   | correct   | correct   | <i>Paphia textile</i>            |
| <i>Paphia vernicosa</i>      | DQ184828 | <i>Paphia papilionacea</i>   | no id     | no id     | no id     | no id     | no id     | no id     | <i>Paphia papilionacea</i>       |
| <i>Paraoncidium reevesii</i> | JN543145 | <i>Paraoncidium reevesii</i> | correct   | correct   | correct   | correct   | correct   | correct   | <i>Platevindex cf. coriaceus</i> |
| <i>Paraoncidium reevesii</i> | JN543146 | <i>Paraoncidium reevesii</i> | correct   | correct   | correct   | correct   | correct   | correct   | <i>Platevindex cf. coriaceus</i> |
| <i>Paraoncidium reevesii</i> | JN543147 | <i>Paraoncidium reevesii</i> | correct   | correct   | correct   | correct   | correct   | correct   | <i>Platevindex cf. coriaceus</i> |
| <i>Paraoncidium reevesii</i> | JN543148 | <i>Paraoncidium reevesii</i> | correct   | correct   | correct   | correct   | correct   | correct   | <i>Platevindex cf. coriaceus</i> |
| <i>Paraoncidium reevesii</i> | JN543149 | <i>Paraoncidium reevesii</i> | correct   | correct   | correct   | correct   | correct   | correct   | <i>Platevindex cf. coriaceus</i> |
| <i>Paraoncidium reevesii</i> | JN543150 | <i>Paraoncidium reevesii</i> | correct   | correct   | correct   | correct   | correct   | correct   | <i>Platevindex cf. coriaceus</i> |
| <i>Paraoncidium reevesii</i> | JN543151 | <i>Paraoncidium reevesii</i> | correct   | correct   | correct   | correct   | correct   | correct   | <i>Platevindex cf. coriaceus</i> |
| <i>Patelloida conulus</i>    | AB161565 | <i>Patelloida conulus</i>    | correct   | correct   | correct   | correct   | correct   | correct   | <i>Patelloida conulus</i>        |
| <i>Patelloida conulus</i>    | AB161566 | <i>Patelloida conulus</i>    | correct   | correct   | correct   | correct   | correct   | correct   | <i>Patelloida conulus</i>        |
| <i>Patelloida conulus</i>    | AB161567 | <i>Patelloida conulus</i>    | correct   | correct   | correct   | correct   | correct   | correct   | <i>Patelloida conulus</i>        |
| <i>Patelloida conulus</i>    | AB161568 | <i>Patelloida conulus</i>    | no id     | correct   | correct   | no id     | correct   | correct   | <i>Patelloida conulus</i>        |
| <i>Patelloida conulus</i>    | AB161569 | <i>Patelloida conulus</i>    | correct   | correct   | correct   | correct   | correct   | correct   | <i>Patelloida conulus</i>        |
| <i>Patelloida conulus</i>    | AB161570 | <i>Patelloida conulus</i>    | no id     | correct   | correct   | no id     | correct   | correct   | <i>Patelloida conulus</i>        |
| <i>Patelloida conulus</i>    | AB161571 | <i>Patelloida conulus</i>    | correct   | correct   | correct   | correct   | correct   | correct   | <i>Patelloida conulus</i>        |
| <i>Patelloida conulus</i>    | AB161572 | <i>Patelloida conulus</i>    | correct   | correct   | correct   | correct   | correct   | correct   | <i>Patelloida conulus</i>        |









|                              |          |                              |           |           |           |           |           |           |                            |
|------------------------------|----------|------------------------------|-----------|-----------|-----------|-----------|-----------|-----------|----------------------------|
| <i>Pelecypora isocardia</i>  | HQ703209 | <i>Pelecypora isocardia</i>  | no id     | no id     | correct   | no id     | no id     | correct   | <i>Callista chione</i>     |
| <i>Pelecypora isocardia</i>  | HQ703210 | <i>Pelecypora isocardia</i>  | ambiguous | ambiguous | ambiguous | ambiguous | ambiguous | ambiguous | <i>Callista chione</i>     |
| <i>Pelecypora trigona</i>    | HM124586 | <i>Pelecypora isocardia</i>  | incorrect | incorrect | incorrect | incorrect | incorrect | incorrect | <i>Callista chione</i>     |
| <i>Periglypta chemnitzii</i> | HQ703330 | <i>Periglypta chemnitzii</i> | correct   | correct   | correct   | correct   | correct   | correct   | <i>Antigona lamellaris</i> |
| <i>Periglypta chemnitzii</i> | HQ703331 | <i>Periglypta chemnitzii</i> | correct   | correct   | correct   | correct   | correct   | correct   | <i>Antigona lamellaris</i> |
| <i>Periglypta chemnitzii</i> | HQ703332 | <i>Periglypta chemnitzii</i> | correct   | correct   | correct   | correct   | correct   | correct   | <i>Antigona lamellaris</i> |
| <i>Periglypta chemnitzii</i> | HQ703333 | <i>Periglypta chemnitzii</i> | correct   | correct   | correct   | correct   | correct   | correct   | <i>Antigona lamellaris</i> |
| <i>Periglypta chemnitzii</i> | HM124614 | <i>Periglypta chemnitzii</i> | correct   | correct   | correct   | correct   | correct   | correct   | <i>Antigona lamellaris</i> |
| <i>Periglypta puerpera</i>   | HQ703318 | <i>Periglypta puerpera</i>   | correct   | correct   | correct   | correct   | correct   | correct   | <i>Periglypta puerpera</i> |
| <i>Periglypta puerpera</i>   | HQ703319 | <i>Periglypta puerpera</i>   | correct   | correct   | correct   | correct   | correct   | correct   | <i>Periglypta puerpera</i> |
| <i>Periglypta puerpera</i>   | HQ703320 | <i>Periglypta puerpera</i>   | correct   | correct   | correct   | correct   | correct   | correct   | <i>Periglypta puerpera</i> |
| <i>Periglypta puerpera</i>   | HQ703321 | <i>Periglypta puerpera</i>   | correct   | correct   | correct   | correct   | correct   | correct   | <i>Periglypta puerpera</i> |
| <i>Periglypta puerpera</i>   | HQ703322 | <i>Periglypta puerpera</i>   | correct   | correct   | correct   | correct   | correct   | correct   | <i>Periglypta puerpera</i> |
| <i>Periglypta puerpera</i>   | HQ703323 | <i>Periglypta puerpera</i>   | correct   | correct   | correct   | correct   | correct   | correct   | <i>Periglypta puerpera</i> |
| <i>Periglypta puerpera</i>   | HQ703324 | <i>Periglypta puerpera</i>   | correct   | correct   | correct   | correct   | correct   | correct   | <i>Periglypta puerpera</i> |
| <i>Periglypta puerpera</i>   | HQ703325 | <i>Periglypta puerpera</i>   | correct   | correct   | correct   | correct   | correct   | correct   | <i>Periglypta puerpera</i> |
| <i>Periglypta puerpera</i>   | HQ703326 | <i>Periglypta puerpera</i>   | correct   | correct   | correct   | correct   | correct   | correct   | <i>Periglypta puerpera</i> |
| <i>Periglypta puerpera</i>   | HQ703327 | <i>Periglypta puerpera</i>   | correct   | correct   | correct   | correct   | correct   | correct   | <i>Periglypta puerpera</i> |
| <i>Periglypta puerpera</i>   | HQ703328 | <i>Periglypta puerpera</i>   | correct   | correct   | correct   | correct   | correct   | correct   | <i>Periglypta puerpera</i> |
| <i>Periglypta puerpera</i>   | HQ703329 | <i>Periglypta compressa</i>  | incorrect | incorrect | incorrect | incorrect | incorrect | incorrect | <i>Periglypta puerpera</i> |
| <i>Periglypta compressa</i>  | HM124606 | <i>Periglypta puerpera</i>   | incorrect | incorrect | incorrect | incorrect | incorrect | incorrect | <i>Periglypta puerpera</i> |
| <i>Perna viridis</i>         | GQ480296 | <i>Perna viridis</i>         | correct   | correct   | correct   | correct   | correct   | correct   | <i>Mytella charruana</i>   |
| <i>Perna viridis</i>         | GQ480297 | <i>Perna viridis</i>         | correct   | correct   | correct   | correct   | correct   | correct   | <i>Mytella charruana</i>   |
| <i>Perna viridis</i>         | GQ480298 | <i>Perna viridis</i>         | correct   | correct   | correct   | correct   | correct   | correct   | <i>Mytella charruana</i>   |
| <i>Perna viridis</i>         | GQ480299 | <i>Perna viridis</i>         | correct   | correct   | correct   | correct   | correct   | correct   | <i>Mytella charruana</i>   |
| <i>Perna viridis</i>         | GQ480300 | <i>Perna viridis</i>         | correct   | correct   | correct   | correct   | correct   | correct   | <i>Mytella charruana</i>   |
| <i>Perna viridis</i>         | GQ480301 | <i>Perna viridis</i>         | correct   | correct   | correct   | correct   | correct   | correct   | <i>Mytella charruana</i>   |
| <i>Perna viridis</i>         | GQ480302 | <i>Perna viridis</i>         | correct   | correct   | correct   | correct   | correct   | correct   | <i>Mytella charruana</i>   |
| <i>Perna viridis</i>         | GQ480303 | <i>Perna viridis</i>         | correct   | correct   | correct   | correct   | correct   | correct   | <i>Mytella charruana</i>   |
| <i>Perna viridis</i>         | GQ480304 | <i>Perna viridis</i>         | correct   | correct   | correct   | correct   | correct   | correct   | <i>Mytella charruana</i>   |
| <i>Peronia verruculata</i>   | JN543152 | <i>Peronia verruculata</i>   | correct   | correct   | correct   | correct   | correct   | correct   | <i>Peronia sp.</i>         |

|                               |          |                               |           |           |           |           |           |           |           |                               |
|-------------------------------|----------|-------------------------------|-----------|-----------|-----------|-----------|-----------|-----------|-----------|-------------------------------|
| <i>Peronia verruculata</i>    | JN543153 | <i>Peronia verruculata</i>    | correct   | correct   | correct   | correct   | correct   | correct   | correct   | <i>Peronia sp.</i>            |
| <i>Peronia verruculata</i>    | JN543154 | <i>Peronia verruculata</i>    | correct   | correct   | correct   | correct   | correct   | correct   | correct   | <i>Peronia sp.</i>            |
| <i>Phalium bisulcatum</i>     | JF693409 | <i>Ficus variegata</i>        | no id     | no id     | no id     | no id     | no id     | no id     | no id     | <i>Casmaria ponderosa</i>     |
| <i>Phalium flammiferum</i>    | JF693410 | <i>Duplicaria dussumieri</i>  | no id     | no id     | no id     | no id     | no id     | no id     | no id     | <i>Casmaria boblehmani</i>    |
| <i>Phasianella solida</i>     | AM049353 | <i>Phasianella solida</i>     | no id     | correct   | correct   | no id     | correct   | correct   | correct   | <i>Phasianella ventricosa</i> |
| <i>Phasianella solida</i>     | AM049354 | <i>Phasianella solida</i>     | no id     | correct   | correct   | no id     | correct   | correct   | correct   | <i>Phasianella ventricosa</i> |
| <i>Pholas orientalis</i>      | KJ125422 | <i>Pholas orientalis</i>      | correct   | correct   | correct   | correct   | correct   | correct   | correct   | <i>Martesia striata</i>       |
| <i>Pholas orientalis</i>      | KJ125423 | <i>Pholas orientalis</i>      | no id     | no id     | correct   | no id     | no id     | correct   | correct   | <i>Martesia striata</i>       |
| <i>Phos senticosus</i>        | JN053008 | <i>Phos senticosus</i>        | correct   | correct   | correct   | correct   | correct   | correct   | correct   | <i>Phos textilis</i>          |
| <i>Phos senticosus</i>        | JN053009 | <i>Phos senticosus</i>        | no id     | correct   | correct   | no id     | correct   | correct   | correct   | <i>Phos textilis</i>          |
| <i>Phos senticosus</i>        | HQ834064 | <i>Phos senticosus</i>        | correct   | correct   | correct   | correct   | correct   | correct   | correct   | <i>Phos textilis</i>          |
| <i>Phos senticosus</i>        | HQ834065 | <i>Phos senticosus</i>        | correct   | correct   | correct   | correct   | correct   | correct   | correct   | <i>Phos textilis</i>          |
| <i>Pinctada albina</i>        | AB261165 | <i>Pinctada maxima</i>        | no id     | no id     | no id     | no id     | no id     | no id     | no id     | <i>Pinctada maculata</i>      |
| <i>Pinctada chemnitzii</i>    | KU341955 | <i>Pinctada chemnitzii</i>    | correct   | correct   | correct   | correct   | correct   | correct   | correct   | <i>Pinctada maculata</i>      |
| <i>Pinctada chemnitzii</i>    | KU341956 | <i>Pinctada chemnitzii</i>    | correct   | correct   | correct   | correct   | correct   | correct   | correct   | <i>Pinctada maculata</i>      |
| <i>Pinctada chemnitzii</i>    | KU341957 | <i>Pinctada chemnitzii</i>    | correct   | correct   | correct   | correct   | correct   | correct   | correct   | <i>Pinctada maculata</i>      |
| <i>Pinctada chemnitzii</i>    | KU341958 | <i>Pinctada chemnitzii</i>    | correct   | correct   | correct   | correct   | correct   | correct   | correct   | <i>Pinctada maculata</i>      |
| <i>Pinctada fucata</i>        | KU341939 | <i>Pinctada fucata</i>        | correct   | correct   | correct   | correct   | correct   | correct   | correct   | <i>Pinctada radiata</i>       |
| <i>Pinctada fucata</i>        | KU341940 | <i>Pinctada fucata</i>        | ambiguous | ambiguous | ambiguous | ambiguous | ambiguous | ambiguous | ambiguous | <i>Pinctada radiata</i>       |
| <i>Pinctada fucata</i>        | KU341941 | <i>Pinctada fucata</i>        | ambiguous | ambiguous | ambiguous | ambiguous | ambiguous | ambiguous | ambiguous | <i>Pinctada radiata</i>       |
| <i>Pinctada fucata</i>        | KU341942 | <i>Pinctada fucata</i>        | ambiguous | ambiguous | ambiguous | ambiguous | ambiguous | ambiguous | ambiguous | <i>Pinctada radiata</i>       |
| <i>Pinctada fucata</i>        | KU341943 | <i>Pinctada fucata</i>        | ambiguous | ambiguous | ambiguous | ambiguous | ambiguous | ambiguous | ambiguous | <i>Pinctada radiata</i>       |
| <i>Pinctada fucata</i>        | KU341944 | <i>Pinctada fucata</i>        | ambiguous | ambiguous | ambiguous | ambiguous | ambiguous | ambiguous | ambiguous | <i>Pinctada radiata</i>       |
| <i>Pinctada fucata</i>        | GQ355871 | <i>Pinctada fucata</i>        | no id     | ambiguous | ambiguous | no id     | ambiguous | ambiguous | ambiguous | <i>Pinctada radiata</i>       |
| <i>Pinctada martensi</i>      | GQ355882 | <i>Pinctada fucata</i>        | ambiguous | ambiguous | ambiguous | ambiguous | ambiguous | ambiguous | ambiguous | <i>Pinctada radiata</i>       |
| <i>Pinctada martensi</i>      | AB076915 | <i>Pinctada fucata</i>        | ambiguous | ambiguous | ambiguous | ambiguous | ambiguous | ambiguous | ambiguous | <i>Pinctada radiata</i>       |
| <i>Pinctada margaritifera</i> | KU341945 | <i>Pinctada margaritifera</i> | ambiguous | ambiguous | ambiguous | ambiguous | ambiguous | ambiguous | ambiguous | <i>Pinctada sp.</i>           |
| <i>Pinctada margaritifera</i> | KU341946 | <i>Pinctada margaritifera</i> | no id     | correct   | correct   | no id     | correct   | correct   | correct   | <i>Pinctada sp.</i>           |
| <i>Pinctada margaritifera</i> | KU341947 | <i>Pinctada margaritifera</i> | correct   | correct   | correct   | correct   | correct   | correct   | correct   | <i>Pinctada sp.</i>           |
| <i>Pinctada margaritifera</i> | KU341948 | <i>Pinctada margaritifera</i> | correct   | correct   | correct   | correct   | correct   | correct   | correct   | <i>Pinctada sp.</i>           |
| <i>Pinctada margaritifera</i> | KU341949 | <i>Pinctada margaritifera</i> | correct   | correct   | correct   | correct   | correct   | correct   | correct   | <i>Pinctada sp.</i>           |

|                                |          |                                |         |         |         |         |         |         |         |                                |
|--------------------------------|----------|--------------------------------|---------|---------|---------|---------|---------|---------|---------|--------------------------------|
| <i>Pinctada margaritifera</i>  | KU341950 | <i>Pinctada margaritifera</i>  | correct | correct | correct | correct | correct | correct | correct | <i>Pinctada sp.</i>            |
| <i>Pinctada margaritifera</i>  | KU341951 | <i>Pinctada margaritifera</i>  | correct | correct | correct | correct | correct | correct | correct | <i>Pinctada sp.</i>            |
| <i>Pinctada margaritifera</i>  | KU341952 | <i>Pinctada margaritifera</i>  | correct | correct | correct | correct | correct | correct | correct | <i>Pinctada sp.</i>            |
| <i>Pinctada margaritifera</i>  | KU341953 | <i>Pinctada margaritifera</i>  | correct | correct | correct | correct | correct | correct | correct | <i>Pinctada sp.</i>            |
| <i>Pinctada margaritifera</i>  | KU341954 | <i>Pinctada margaritifera</i>  | correct | correct | correct | correct | correct | correct | correct | <i>Pinctada sp.</i>            |
| <i>Pinctada margaritifera</i>  | AB259166 | <i>Pinctada margaritifera</i>  | no id   | correct | correct | no id   | correct | correct | correct | <i>Pinctada sp.</i>            |
| <i>Pinctada maxima</i>         | KU341937 | <i>Pinctada maxima</i>         | correct | correct | correct | correct | correct | correct | correct | <i>Pinctada margaritifera</i>  |
| <i>Pinctada maxima</i>         | KU341938 | <i>Pinctada maxima</i>         | correct | correct | correct | correct | correct | correct | correct | <i>Pinctada margaritifera</i>  |
| <i>Pitarina japonica</i>       | HQ703206 | <i>Pitarina japonica</i>       | correct | correct | correct | correct | correct | correct | correct | <i>Pitar japonicum</i>         |
| <i>Pitarina japonica</i>       | HQ703207 | <i>Pitarina japonica</i>       | no id   | no id   | correct | no id   | no id   | correct | correct | <i>Pitar japonicum</i>         |
| <i>Pitarina striatum</i>       | HQ703203 | <i>Pitar striatus</i>          | correct | correct | correct | correct | correct | correct | correct | <i>Pitar japonicum</i>         |
| <i>Pitarina striatum</i>       | HQ703204 | <i>Pitar striatus</i>          | correct | correct | correct | correct | correct | correct | correct | <i>Pitar japonicum</i>         |
| <i>Pitarina striatum</i>       | HQ703205 | <i>Pitar striatus</i>          | correct | correct | correct | correct | correct | correct | correct | <i>Pitar japonicum</i>         |
| <i>Placamen calophylla</i>     | HQ703062 | <i>Placamen calophylla</i>     | correct | correct | correct | correct | correct | correct | correct | <i>Placamen sp.</i>            |
| <i>Placamen calophylla</i>     | HQ703063 | <i>Placamen calophylla</i>     | correct | correct | correct | correct | correct | correct | correct | <i>Placamen sp.</i>            |
| <i>Placamen calophylla</i>     | HQ703064 | <i>Placamen calophylla</i>     | correct | correct | correct | correct | correct | correct | correct | <i>Placamen sp.</i>            |
| <i>Placamen isabellina</i>     | HQ703057 | <i>Placamen isabellina</i>     | correct | correct | correct | correct | correct | correct | correct | <i>Placamen flindersi</i>      |
| <i>Placamen isabellina</i>     | HQ703058 | <i>Placamen isabellina</i>     | correct | correct | correct | correct | correct | correct | correct | <i>Placamen flindersi</i>      |
| <i>Placamen isabellina</i>     | HQ703059 | <i>Placamen isabellina</i>     | correct | correct | correct | correct | correct | correct | correct | <i>Placamen flindersi</i>      |
| <i>Placamen isabellina</i>     | HQ703060 | <i>Placamen isabellina</i>     | correct | correct | correct | correct | correct | correct | correct | <i>Placamen flindersi</i>      |
| <i>Placamen isabellina</i>     | HQ703061 | <i>Placamen isabellina</i>     | correct | correct | correct | correct | correct | correct | correct | <i>Placamen flindersi</i>      |
| <i>Plakobranthus ocellatus</i> | AB758971 | <i>Elysia ornata</i>           | no id   | no id   | no id   | no id   | no id   | no id   | no id   | <i>Plakobranthus ocellatus</i> |
| <i>Plakobranthus ocellatus</i> | AB758970 | <i>Plakobranthus ocellatus</i> | no id   | correct | correct | no id   | correct | correct | correct | <i>Plakobranthus sp.</i>       |
| <i>Plakobranthus ocellatus</i> | AB501307 | <i>Plakobranthus ocellatus</i> | no id   | correct | correct | no id   | correct | correct | correct | <i>Plakobranthus sp.</i>       |
| <i>Plakobranthus ocellatus</i> | AB758969 | <i>Plakobranthus ocellatus</i> | no id   | no id   | no id   | no id   | no id   | no id   | no id   | <i>Plakobranthus sp.</i>       |
| <i>Plakobranthus ocellatus</i> | AB758968 | <i>Elysia ornata</i>           | no id   | no id   | no id   | no id   | no id   | no id   | no id   | <i>Plakobranthus sp.</i>       |
| <i>Platevindex mortoni</i>     | JN543136 | <i>Platevindex mortoni</i>     | correct | correct | correct | correct | correct | correct | correct | <i>Platevindex mortoni</i>     |
| <i>Platevindex mortoni</i>     | JN543137 | <i>Platevindex mortoni</i>     | correct | correct | correct | correct | correct | correct | correct | <i>Platevindex mortoni</i>     |
| <i>Platevindex mortoni</i>     | JN543139 | <i>Platevindex mortoni</i>     | correct | correct | correct | correct | correct | correct | correct | <i>Platevindex mortoni</i>     |
| <i>Platevindex mortoni</i>     | JN543140 | <i>Platevindex mortoni</i>     | correct | correct | correct | correct | correct | correct | correct | <i>Platevindex mortoni</i>     |
| <i>Platevindex mortoni</i>     | JN543141 | <i>Platevindex mortoni</i>     | correct | correct | correct | correct | correct | correct | correct | <i>Platevindex mortoni</i>     |

|                              |          |                              |           |           |           |           |           |           |                              |
|------------------------------|----------|------------------------------|-----------|-----------|-----------|-----------|-----------|-----------|------------------------------|
| <i>Platevindex mortoni</i>   | JN543138 | <i>Platevindex mortoni</i>   | no id     | no id     | no id     | no id     | no id     | no id     | <i>Platevindex mortoni</i>   |
| <i>Pomaulax japonicus</i>    | AM049380 | <i>Pomaulax japonicus</i>    | correct   | correct   | correct   | correct   | correct   | correct   | <i>Pomaulax gibberosus</i>   |
| <i>Pomaulax japonicus</i>    | AB297737 | <i>Pomaulax japonicus</i>    | correct   | correct   | correct   | correct   | correct   | correct   | <i>Pomaulax gibberosus</i>   |
| <i>Protaeolidiella atra</i>  | KP143676 | <i>Protaeolidiella atra</i>  | correct   | correct   | correct   | correct   | correct   | correct   | <i>Doto cf. cuspidata</i>    |
| <i>Protaeolidiella atra</i>  | KP143675 | <i>Protaeolidiella atra</i>  | correct   | correct   | correct   | correct   | correct   | correct   | <i>Doto cf. cuspidata</i>    |
| <i>Protothaca jedomensis</i> | HQ703065 | <i>Protothaca jedomensis</i> | correct   | correct   | correct   | correct   | correct   | correct   | <i>Protothaca jedomensis</i> |
| <i>Protothaca jedomensis</i> | HQ703066 | <i>Protothaca jedomensis</i> | correct   | correct   | correct   | correct   | correct   | correct   | <i>Protothaca jedomensis</i> |
| <i>Protothaca jedomensis</i> | HQ703067 | <i>Protothaca jedomensis</i> | no id     | correct   | correct   | no id     | correct   | correct   | <i>Protothaca jedomensis</i> |
| <i>Protothaca jedomensis</i> | HQ703068 | <i>Protothaca jedomensis</i> | correct   | correct   | correct   | correct   | correct   | correct   | <i>Protothaca jedomensis</i> |
| <i>Protothaca jedomensis</i> | HQ703069 | <i>Protothaca jedomensis</i> | correct   | correct   | correct   | correct   | correct   | correct   | <i>Protothaca jedomensis</i> |
| <i>Protothaca jedomensis</i> | HQ703070 | <i>Protothaca jedomensis</i> | correct   | correct   | correct   | correct   | correct   | correct   | <i>Protothaca jedomensis</i> |
| <i>Protothaca jedomensis</i> | HM124607 | <i>Protothaca jedomensis</i> | correct   | correct   | correct   | correct   | correct   | correct   | <i>Protothaca jedomensis</i> |
| <i>Protothaca jedomensis</i> | HM124605 | <i>Protothaca jedomensis</i> | correct   | correct   | correct   | correct   | correct   | correct   | <i>Protothaca jedomensis</i> |
| <i>Protothaca jedomensis</i> | DQ399397 | <i>Protothaca jedomensis</i> | incorrect | incorrect | incorrect | incorrect | incorrect | incorrect | <i>Mactra quadrangularis</i> |
| <i>Mactra veneriformis</i>   | JN674621 | <i>Mactra veneriformis</i>   | ambiguous | ambiguous | ambiguous | ambiguous | ambiguous | ambiguous | <i>Mactra quadrangularis</i> |
| <i>Mactra veneriformis</i>   | JN674622 | <i>Mactra veneriformis</i>   | ambiguous | ambiguous | ambiguous | ambiguous | ambiguous | ambiguous | <i>Mactra quadrangularis</i> |
| <i>Mactra veneriformis</i>   | JN674623 | <i>Mactra veneriformis</i>   | ambiguous | ambiguous | ambiguous | ambiguous | ambiguous | ambiguous | <i>Mactra quadrangularis</i> |
| <i>Mactra veneriformis</i>   | JN674624 | <i>Mactra veneriformis</i>   | no id     | ambiguous | ambiguous | no id     | ambiguous | ambiguous | <i>Mactra quadrangularis</i> |
| <i>Mactra veneriformis</i>   | JN674625 | <i>Mactra veneriformis</i>   | ambiguous | ambiguous | ambiguous | ambiguous | ambiguous | ambiguous | <i>Mactra quadrangularis</i> |
| <i>Mactra veneriformis</i>   | GQ864250 | <i>Mactra veneriformis</i>   | ambiguous | ambiguous | ambiguous | ambiguous | ambiguous | ambiguous | <i>Mactra quadrangularis</i> |
| <i>Mactra veneriformis</i>   | FJ851355 | <i>Mactra veneriformis</i>   | ambiguous | ambiguous | ambiguous | ambiguous | ambiguous | ambiguous | <i>Mactra quadrangularis</i> |
| <i>Mactra veneriformis</i>   | GQ864249 | <i>Mactra veneriformis</i>   | ambiguous | ambiguous | ambiguous | ambiguous | ambiguous | ambiguous | <i>Mactra quadrangularis</i> |
| <i>Mactra veneriformis</i>   | GQ864248 | <i>Mactra veneriformis</i>   | ambiguous | ambiguous | ambiguous | ambiguous | ambiguous | ambiguous | <i>Mactra quadrangularis</i> |
| <i>Mactra veneriformis</i>   | GQ864247 | <i>Mactra veneriformis</i>   | ambiguous | ambiguous | ambiguous | ambiguous | ambiguous | ambiguous | <i>Mactra quadrangularis</i> |
| <i>Mactra veneriformis</i>   | GQ864246 | <i>Mactra veneriformis</i>   | no id     | ambiguous | ambiguous | no id     | ambiguous | ambiguous | <i>Mactra quadrangularis</i> |
| <i>Mactra veneriformis</i>   | GQ864245 | <i>Mactra veneriformis</i>   | ambiguous | ambiguous | ambiguous | ambiguous | ambiguous | ambiguous | <i>Mactra quadrangularis</i> |
| <i>Mactra veneriformis</i>   | GQ864244 | <i>Mactra veneriformis</i>   | ambiguous | ambiguous | ambiguous | ambiguous | ambiguous | ambiguous | <i>Mactra quadrangularis</i> |
| <i>Mactra veneriformis</i>   | GQ864243 | <i>Mactra veneriformis</i>   | no id     | ambiguous | ambiguous | no id     | ambiguous | ambiguous | <i>Mactra quadrangularis</i> |
| <i>Mactra veneriformis</i>   | GQ864242 | <i>Mactra veneriformis</i>   | ambiguous | ambiguous | ambiguous | ambiguous | ambiguous | ambiguous | <i>Mactra quadrangularis</i> |
| <i>Mactra veneriformis</i>   | GQ864241 | <i>Mactra veneriformis</i>   | ambiguous | ambiguous | ambiguous | ambiguous | ambiguous | ambiguous | <i>Mactra quadrangularis</i> |
| <i>Mactra veneriformis</i>   | GQ864240 | <i>Mactra veneriformis</i>   | ambiguous | ambiguous | ambiguous | ambiguous | ambiguous | ambiguous | <i>Mactra quadrangularis</i> |

|                                    |          |                                    |           |           |           |           |           |           |                                   |
|------------------------------------|----------|------------------------------------|-----------|-----------|-----------|-----------|-----------|-----------|-----------------------------------|
| <i>Mactra veneriformis</i>         | GQ864239 | <i>Mactra veneriformis</i>         | ambiguous | ambiguous | ambiguous | ambiguous | ambiguous | ambiguous | <i>Mactra quadrangularis</i>      |
| <i>Mactra veneriformis</i>         | GQ864238 | <i>Mactra veneriformis</i>         | ambiguous | ambiguous | ambiguous | ambiguous | ambiguous | ambiguous | <i>Mactra quadrangularis</i>      |
| <i>Pseudocardium sachalinensis</i> | JN674604 | <i>Pseudocardium sachalinensis</i> | no id     | correct   | correct   | no id     | correct   | correct   | <i>Pseudocardium sachalinense</i> |
| <i>Pseudocardium sachalinensis</i> | JN674605 | <i>Pseudocardium sachalinensis</i> | no id     | correct   | correct   | no id     | correct   | correct   | <i>Pseudocardium sachalinense</i> |
| <i>Pseudostomatella decolorata</i> | AB505290 | <i>Pseudostomatella decolorata</i> | correct   | correct   | correct   | correct   | correct   | correct   | <i>Stomatia phymotis</i>          |
| <i>Pseudostomatella decolorata</i> | AB505291 | <i>Pseudostomatella decolorata</i> | correct   | correct   | correct   | correct   | correct   | correct   | <i>Stomatia phymotis</i>          |
| <i>Pteria breviaalata</i>          | KU341962 | <i>Pteria penguin</i>              | correct   | correct   | correct   | correct   | correct   | correct   | <i>Pteria sp.</i>                 |
| <i>Pteria penguin</i>              | KU341959 | <i>Pteria penguin</i>              | correct   | correct   | correct   | correct   | correct   | correct   | <i>Pteria loveni</i>              |
| <i>Pteria penguin</i>              | KU341960 | <i>Pteria penguin</i>              | correct   | correct   | correct   | correct   | correct   | correct   | <i>Pteria loveni</i>              |
| <i>Pteria penguin</i>              | KU341961 | <i>Pteria penguin</i>              | no id     | correct   | correct   | no id     | correct   | correct   | <i>Pteria loveni</i>              |
| <i>Rapana bezoar</i>               | GU188166 | <i>Rapana bezoar</i>               | correct   | correct   | correct   | correct   | correct   | correct   | <i>Muricidae sp.</i>              |
| <i>Rapana bezoar</i>               | GU188167 | <i>Rapana bezoar</i>               | correct   | correct   | correct   | correct   | correct   | correct   | <i>Muricidae sp.</i>              |
| <i>Rapana bezoar</i>               | GU188168 | <i>Rapana bezoar</i>               | correct   | correct   | correct   | correct   | correct   | correct   | <i>Muricidae sp.</i>              |
| <i>Rapana bezoar</i>               | GU188169 | <i>Rapana bezoar</i>               | correct   | correct   | correct   | correct   | correct   | correct   | <i>Muricidae sp.</i>              |
| <i>Rapana bezoar</i>               | GU188170 | <i>Rapana bezoar</i>               | correct   | correct   | correct   | correct   | correct   | correct   | <i>Muricidae sp.</i>              |
| <i>Rapana bezoar</i>               | FN677421 | <i>Rapana bezoar</i>               | correct   | correct   | correct   | correct   | correct   | correct   | <i>Muricidae sp.</i>              |
| <i>Rapana rapiformis</i>           | GU188189 | <i>Rapana rapiformis</i>           | correct   | correct   | correct   | correct   | correct   | correct   | <i>Rapana bezoar</i>              |
| <i>Rapana rapiformis</i>           | GU188190 | <i>Rapana rapiformis</i>           | correct   | correct   | correct   | correct   | correct   | correct   | <i>Rapana bezoar</i>              |
| <i>Rapana rapiformis</i>           | GU188191 | <i>Rapana rapiformis</i>           | correct   | correct   | correct   | correct   | correct   | correct   | <i>Rapana bezoar</i>              |
| <i>Rapana rapiformis</i>           | GU188192 | <i>Rapana rapiformis</i>           | correct   | correct   | correct   | correct   | correct   | correct   | <i>Rapana bezoar</i>              |
| <i>Rapana rapiformis</i>           | GU188193 | <i>Rapana rapiformis</i>           | correct   | correct   | correct   | correct   | correct   | correct   | <i>Rapana bezoar</i>              |
| <i>Rapana rapiformis</i>           | GU188194 | <i>Rapana rapiformis</i>           | correct   | correct   | correct   | correct   | correct   | correct   | <i>Rapana bezoar</i>              |
| <i>Rapana venosa</i>               | GU188175 | <i>Rapana venosa</i>               | no id     | correct   | correct   | no id     | correct   | correct   | <i>Lataxiena blosvillei</i>       |
| <i>Rapana venosa</i>               | GU188176 | <i>Rapana venosa</i>               | correct   | correct   | correct   | correct   | correct   | correct   | <i>Lataxiena blosvillei</i>       |
| <i>Rapana venosa</i>               | GU188177 | <i>Rapana venosa</i>               | correct   | correct   | correct   | correct   | correct   | correct   | <i>Lataxiena blosvillei</i>       |
| <i>Rapana venosa</i>               | GU188178 | <i>Rapana venosa</i>               | correct   | correct   | correct   | correct   | correct   | correct   | <i>Lataxiena blosvillei</i>       |
| <i>Rapana venosa</i>               | GU188179 | <i>Rapana venosa</i>               | correct   | correct   | correct   | correct   | correct   | correct   | <i>Lataxiena blosvillei</i>       |
| <i>Rapana venosa</i>               | HE584367 | <i>Rapana venosa</i>               | correct   | correct   | correct   | correct   | correct   | correct   | <i>Lataxiena blosvillei</i>       |
| <i>Rapana venosa</i>               | HM180814 | <i>Rapana venosa</i>               | correct   | correct   | correct   | correct   | correct   | correct   | <i>Lataxiena blosvillei</i>       |
| <i>Rapana venosa</i>               | HM180815 | <i>Rapana venosa</i>               | correct   | correct   | correct   | correct   | correct   | correct   | <i>Lataxiena blosvillei</i>       |
| <i>Rapana venosa</i>               | HM180816 | <i>Rapana venosa</i>               | correct   | correct   | correct   | correct   | correct   | correct   | <i>Lataxiena blosvillei</i>       |



|                                 |          |                                 |           |           |           |           |           |           |           |                                   |
|---------------------------------|----------|---------------------------------|-----------|-----------|-----------|-----------|-----------|-----------|-----------|-----------------------------------|
| <i>Ruditapes philippinarum</i>  | AB244399 | <i>Ruditapes philippinarum</i>  | ambiguous | ambiguous | ambiguous | ambiguous | ambiguous | ambiguous | ambiguous | <i>Macridiscus semicancellata</i> |
| <i>Ruditapes philippinarum</i>  | AB244400 | <i>Ruditapes philippinarum</i>  | ambiguous | ambiguous | ambiguous | ambiguous | ambiguous | ambiguous | ambiguous | <i>Macridiscus semicancellata</i> |
| <i>Ruditapes philippinarum</i>  | AB244401 | <i>Ruditapes philippinarum</i>  | no id     | ambiguous | ambiguous | no id     | ambiguous | ambiguous | ambiguous | <i>Macridiscus semicancellata</i> |
| <i>Ruditapes philippinarum</i>  | HM180833 | <i>Ruditapes philippinarum</i>  | ambiguous | ambiguous | ambiguous | ambiguous | ambiguous | ambiguous | ambiguous | <i>Macridiscus semicancellata</i> |
| <i>Ruditapes philippinarum</i>  | HM180834 | <i>Ruditapes philippinarum</i>  | correct   | correct   | correct   | correct   | ambiguous | ambiguous | ambiguous | <i>Macridiscus semicancellata</i> |
| <i>Ruditapes variegata</i>      | GQ855270 | <i>Ruditapes variegata</i>      | incorrect | incorrect | incorrect | incorrect | incorrect | incorrect | incorrect | <i>Macridiscus semicancellata</i> |
| <i>Ruditapes variegata</i>      | HQ703312 | <i>Ruditapes variegata</i>      | correct   | correct   | correct   | correct   | correct   | correct   | correct   | <i>Ruditapes variegatus</i>       |
| <i>Ruditapes variegata</i>      | HQ703313 | <i>Ruditapes variegata</i>      | correct   | correct   | correct   | correct   | correct   | correct   | correct   | <i>Ruditapes variegatus</i>       |
| <i>Ruditapes variegata</i>      | HQ703314 | <i>Ruditapes variegata</i>      | correct   | correct   | correct   | correct   | correct   | correct   | correct   | <i>Ruditapes variegatus</i>       |
| <i>Ruditapes variegata</i>      | HQ703315 | <i>Ruditapes variegata</i>      | correct   | correct   | correct   | correct   | correct   | correct   | correct   | <i>Ruditapes variegatus</i>       |
| <i>Ruditapes variegata</i>      | HQ703316 | <i>Ruditapes variegata</i>      | correct   | correct   | correct   | correct   | correct   | correct   | correct   | <i>Ruditapes variegatus</i>       |
| <i>Ruditapes variegata</i>      | HQ703317 | <i>Ruditapes variegata</i>      | correct   | correct   | correct   | correct   | correct   | correct   | correct   | <i>Ruditapes variegatus</i>       |
| <i>Ruditapes variegata</i>      | GQ855268 | <i>Ruditapes variegata</i>      | correct   | correct   | correct   | correct   | correct   | correct   | correct   | <i>Ruditapes variegatus</i>       |
| <i>Ruditapes variegata</i>      | GQ855269 | <i>Ruditapes variegata</i>      | correct   | correct   | correct   | correct   | correct   | correct   | correct   | <i>Ruditapes variegatus</i>       |
| <i>Ruditapes variegata</i>      | GQ855271 | <i>Ruditapes variegata</i>      | correct   | correct   | correct   | correct   | correct   | correct   | correct   | <i>Ruditapes variegatus</i>       |
| <i>Saccostrea mordax</i>        | HQ661025 | <i>Saccostrea mordax</i>        | correct   | correct   | correct   | correct   | correct   | correct   | correct   | <i>Saccostrea cucullata</i>       |
| <i>Saccostrea mordax</i>        | HQ661026 | <i>Saccostrea mordax</i>        | correct   | correct   | correct   | correct   | correct   | correct   | correct   | <i>Saccostrea cucullata</i>       |
| <i>Saccostrea mordax</i>        | HQ661027 | <i>Saccostrea mordax</i>        | correct   | correct   | correct   | correct   | correct   | correct   | correct   | <i>Saccostrea cucullata</i>       |
| <i>Saccostrea mordax</i>        | HQ661028 | <i>Saccostrea mordax</i>        | correct   | correct   | correct   | correct   | correct   | correct   | correct   | <i>Saccostrea cucullata</i>       |
| <i>Saccostrea mordax</i>        | HQ661029 | <i>Saccostrea mordax</i>        | correct   | correct   | correct   | correct   | correct   | correct   | correct   | <i>Saccostrea cucullata</i>       |
| <i>Sagamilepeta sagamiensis</i> | AB543981 | <i>Sagamilepeta sagamiensis</i> | correct   | correct   | correct   | correct   | correct   | correct   | correct   | <i>Lepeta caeca</i>               |
| <i>Sagamilepeta sagamiensis</i> | AB543982 | <i>Sagamilepeta sagamiensis</i> | correct   | correct   | correct   | correct   | correct   | correct   | correct   | <i>Lepeta caeca</i>               |
| <i>Soletellina diphos</i>       | JN859948 | <i>Donax dysoni</i>             | no id     | no id     | no id     | no id     | no id     | no id     | no id     | <i>Psammotaea sp.</i>             |
| <i>Psammotaea elongata</i>      | JN859936 | <i>Psammotaea elongata</i>      | correct   | correct   | correct   | correct   | correct   | correct   | correct   | <i>Semele rubropicta</i>          |
| <i>Psammotaea elongata</i>      | JN859938 | <i>Psammotaea elongata</i>      | correct   | correct   | correct   | correct   | correct   | correct   | correct   | <i>Semele rubropicta</i>          |
| <i>Psammotaea elongata</i>      | JN859940 | <i>Psammotaea elongata</i>      | correct   | correct   | correct   | correct   | correct   | correct   | correct   | <i>Semele rubropicta</i>          |
| <i>Psammotaea elongata</i>      | JN859941 | <i>Psammotaea elongata</i>      | correct   | correct   | correct   | correct   | correct   | correct   | correct   | <i>Semele rubropicta</i>          |
| <i>Nuttallia olivacea</i>       | JN859954 | <i>Nuttallia olivacea</i>       | no id     | correct   | correct   | no id     | correct   | correct   | correct   | <i>Psammotaea sp.</i>             |
| <i>Nuttallia olivacea</i>       | JN859955 | <i>Nuttallia olivacea</i>       | no id     | correct   | correct   | no id     | correct   | correct   | correct   | <i>Psammotaea sp.</i>             |
| <i>Sanguinolaria tchangsii</i>  | JN859945 | <i>Sanguinolaria tchangsii</i>  | correct   | correct   | correct   | correct   | correct   | correct   | correct   | <i>Tellina carpenteri</i>         |
| <i>Sanguinolaria tchangsii</i>  | JN859947 | <i>Sanguinolaria tchangsii</i>  | correct   | correct   | correct   | correct   | correct   | correct   | correct   | <i>Tellina carpenteri</i>         |

|                              |          |                               |         |         |         |         |         |         |                              |
|------------------------------|----------|-------------------------------|---------|---------|---------|---------|---------|---------|------------------------------|
| <i>Soletellina virescens</i> | JN859943 | <i>Sanguinolaria olivacea</i> | no id   | no id   | no id   | no id   | no id   | no id   | <i>Soletellina chinensis</i> |
| <i>Saxidomus purpuratus</i>  | HQ703041 | <i>Saxidomus purpurata</i>    | correct | correct | correct | correct | correct | correct | <i>Saxidomus gigantea</i>    |
| <i>Saxidomus purpuratus</i>  | HQ703042 | <i>Saxidomus purpurata</i>    | correct | correct | correct | correct | correct | correct | <i>Saxidomus gigantea</i>    |
| <i>Saxidomus purpuratus</i>  | HQ703043 | <i>Saxidomus purpurata</i>    | correct | correct | correct | correct | correct | correct | <i>Saxidomus gigantea</i>    |
| <i>Saxidomus purpuratus</i>  | HQ703044 | <i>Saxidomus purpurata</i>    | correct | correct | correct | correct | correct | correct | <i>Saxidomus gigantea</i>    |
| <i>Saxidomus purpuratus</i>  | HQ703045 | <i>Saxidomus purpurata</i>    | correct | correct | correct | correct | correct | correct | <i>Saxidomus gigantea</i>    |
| <i>Saxidomus purpuratus</i>  | HQ703046 | <i>Saxidomus purpurata</i>    | no id   | correct | correct | no id   | correct | correct | <i>Saxidomus gigantea</i>    |
| <i>Saxidomus purpuratus</i>  | HQ703047 | <i>Saxidomus purpurata</i>    | correct | correct | correct | correct | correct | correct | <i>Saxidomus gigantea</i>    |
| <i>Saxidomus purpuratus</i>  | KP419933 | <i>Saxidomus purpurata</i>    | correct | correct | correct | correct | correct | correct | <i>Saxidomus gigantea</i>    |
| <i>Saxidomus purpuratus</i>  | JN898951 | <i>Saxidomus purpurata</i>    | correct | correct | correct | correct | correct | correct | <i>Saxidomus gigantea</i>    |
| <i>Saxidomus purpuratus</i>  | HM124571 | <i>Saxidomus purpurata</i>    | correct | correct | correct | correct | correct | correct | <i>Saxidomus gigantea</i>    |
| <i>Saxidomus purpuratus</i>  | EU118007 | <i>Saxidomus purpurata</i>    | correct | correct | correct | correct | correct | correct | <i>Saxidomus gigantea</i>    |
| <i>Scapharca broughtonii</i> | AB050894 | <i>Scapharca broughtonii</i>  | correct | correct | correct | correct | correct | correct | <i>Scapharca broughtonii</i> |
| <i>Scapharca broughtonii</i> | AB729113 | <i>Scapharca broughtonii</i>  | correct | correct | correct | correct | correct | correct | <i>Scapharca broughtonii</i> |
| <i>Scapharca broughtonii</i> | KU341869 | <i>Scapharca broughtonii</i>  | correct | correct | correct | correct | correct | correct |                              |
| <i>Scapharca broughtonii</i> | KU341870 | <i>Scapharca broughtonii</i>  | correct | correct | correct | correct | correct | correct |                              |
| <i>Scapharca broughtonii</i> | KU341871 | <i>Scapharca broughtonii</i>  | correct | correct | correct | correct | correct | correct |                              |
| <i>Scapharca broughtonii</i> | KU341872 | <i>Scapharca broughtonii</i>  | correct | correct | correct | correct | correct | correct |                              |
| <i>Scapharca broughtonii</i> | KU341873 | <i>Scapharca broughtonii</i>  | correct | correct | correct | correct | correct | correct |                              |
| <i>Scapharca cornea</i>      | KU341858 | <i>Scapharca cornea</i>       | correct | correct | correct | correct | correct | correct |                              |
| <i>Scapharca cornea</i>      | KU341859 | <i>Scapharca cornea</i>       | correct | correct | correct | correct | correct | correct |                              |
| <i>Scapharca cornea</i>      | KU341860 | <i>Scapharca cornea</i>       | correct | correct | correct | correct | correct | correct |                              |
| <i>Scapharca cornea</i>      | KU341861 | <i>Scapharca cornea</i>       | correct | correct | correct | correct | correct | correct |                              |
| <i>Scapharca cornea</i>      | KU341862 | <i>Scapharca cornea</i>       | correct | correct | correct | correct | correct | correct |                              |
| <i>Scapharca cornea</i>      | KU341863 | <i>Scapharca cornea</i>       | correct | correct | correct | correct | correct | correct |                              |
| <i>Scapharca cornea</i>      | KU341864 | <i>Scapharca cornea</i>       | correct | correct | correct | correct | correct | correct |                              |
| <i>Scapharca globosa</i>     | KU341846 | <i>Scapharca globosa</i>      | correct | correct | correct | correct | correct | correct |                              |
| <i>Scapharca globosa</i>     | KU341847 | <i>Scapharca globosa</i>      | correct | correct | correct | correct | correct | correct |                              |
| <i>Scapharca globosa</i>     | KU341848 | <i>Scapharca globosa</i>      | correct | correct | correct | correct | correct | correct |                              |
| <i>Scapharca globosa</i>     | KU341849 | <i>Scapharca globosa</i>      | correct | correct | correct | correct | correct | correct |                              |
| <i>Scapharca globosa</i>     | KU341850 | <i>Scapharca globosa</i>      | correct | correct | correct | correct | correct | correct |                              |





|                                |          |                                 |         |           |           |         |           |           |                              |
|--------------------------------|----------|---------------------------------|---------|-----------|-----------|---------|-----------|-----------|------------------------------|
| <i>Scapharca kagoshimensis</i> | AB854403 | <i>Scapharca kagoshimensis</i>  | correct | correct   | correct   | correct | correct   | correct   | <i>Scapharca broughtonii</i> |
| <i>Scapharca kagoshimensis</i> | AB854404 | <i>Scapharca kagoshimensis</i>  | correct | correct   | correct   | correct | correct   | correct   | <i>Scapharca broughtonii</i> |
| <i>Scapharca kagoshimensis</i> | AB854405 | <i>Scapharca kagoshimensis</i>  | no id   | no id     | correct   | no id   | no id     | correct   | <i>Scapharca broughtonii</i> |
| <i>Scapharca satowi</i>        | AB050898 | <i>Scapharca inaequalvalvis</i> | no id   | no id     | no id     | no id   | no id     | no id     | <i>Scapharca broughtonii</i> |
| <i>Scutellastra flexuosa</i>   | AB238583 | <i>Scutellastra optima</i>      | no id   | no id     | no id     | no id   | no id     | no id     | <i>Scutellastra optima</i>   |
| <i>Scutellastra optima</i>     | AB238585 | <i>Scutellastra flexuosa</i>    | no id   | no id     | no id     | no id   | no id     | no id     | <i>Scutellastra flexuosa</i> |
| <i>Semele cf amabilis</i>      | JN859975 | <i>Sanguinolaria olivacea</i>   | no id   | no id     | no id     | no id   | no id     | no id     | <i>Soletellina chinensis</i> |
| <i>Semele scaba</i>            | JN859973 | <i>Semele scabra</i>            | correct | correct   | correct   | correct | correct   | correct   | <i>Semele cf. amabilis</i>   |
| <i>Semele scaba</i>            | JN859974 | <i>Semele scabra</i>            | correct | correct   | correct   | correct | correct   | correct   | <i>Semele cf. amabilis</i>   |
| <i>Sepia aculeata</i>          | HQ846106 | <i>Sepia aculeata</i>           | correct | correct   | correct   | correct | correct   | correct   | <i>Sepiida sp.</i>           |
| <i>Sepia aculeata</i>          | HQ846107 | <i>Sepia aculeata</i>           | correct | correct   | correct   | correct | correct   | correct   | <i>Sepiida sp.</i>           |
| <i>Sepia aculeata</i>          | HQ846108 | <i>Sepia aculeata</i>           | correct | correct   | correct   | correct | correct   | correct   | <i>Sepiida sp.</i>           |
| <i>Sepia aculeata</i>          | HQ846083 | <i>Sepia aculeata</i>           | correct | correct   | correct   | correct | correct   | correct   | <i>Sepiida sp.</i>           |
| <i>Sepia andreana</i>          | AB430401 | <i>Sepia kobeensis</i>          | no id   | no id     | incorrect | no id   | no id     | incorrect | <i>Sepia hirunda</i>         |
| <i>Sepia aureomaculata</i>     | AB430402 | <i>Sepia lorigera</i>           | no id   | incorrect | incorrect | no id   | incorrect | incorrect | <i>Sepia sp.</i>             |
| <i>Sepia esculenta</i>         | HQ846084 | <i>Sepia esculenta</i>          | correct | correct   | correct   | correct | correct   | correct   | <i>Sepia esculenta</i>       |
| <i>Sepia esculenta</i>         | HQ846085 | <i>Sepia esculenta</i>          | correct | correct   | correct   | correct | correct   | correct   | <i>Sepia esculenta</i>       |
| <i>Sepia esculenta</i>         | HQ846086 | <i>Sepia esculenta</i>          | correct | correct   | correct   | correct | correct   | correct   | <i>Sepia esculenta</i>       |
| <i>Sepia esculenta</i>         | HQ846089 | <i>Sepia esculenta</i>          | correct | correct   | correct   | correct | correct   | correct   | <i>Sepia esculenta</i>       |
| <i>Sepia esculenta</i>         | HQ846087 | <i>Sepia esculenta</i>          | correct | correct   | correct   | correct | correct   | correct   | <i>Sepia esculenta</i>       |
| <i>Sepia esculenta</i>         | HQ846088 | <i>Sepia esculenta</i>          | correct | correct   | correct   | correct | correct   | correct   | <i>Sepia esculenta</i>       |
| <i>Sepia esculenta</i>         | HQ846091 | <i>Sepia esculenta</i>          | correct | correct   | correct   | correct | correct   | correct   | <i>Sepia esculenta</i>       |
| <i>Sepia esculenta</i>         | HQ846090 | <i>Sepia esculenta</i>          | correct | correct   | correct   | correct | correct   | correct   | <i>Sepia esculenta</i>       |
| <i>Sepia esculenta</i>         | AB192335 | <i>Sepia esculenta</i>          | no id   | no id     | no id     | no id   | no id     | no id     | <i>Sepia esculenta</i>       |
| <i>Sepia kobeensis</i>         | AB193813 | <i>Sepia andreana</i>           | no id   | no id     | incorrect | no id   | no id     | incorrect | <i>Sepia furcata</i>         |
| <i>Sepia latimanus</i>         | AB192338 | <i>Sepia esculenta</i>          | no id   | no id     | no id     | no id   | no id     | no id     | <i>Sepiida sp.</i>           |
| <i>Sepia lorigera</i>          | AB193810 | <i>Sepia aureomaculata</i>      | no id   | incorrect | incorrect | no id   | incorrect | incorrect | <i>Sepia aureomaculata</i>   |
| <i>Sepia lycidas</i>           | HQ846109 | <i>Sepia lycidas</i>            | correct | correct   | correct   | correct | correct   | correct   | <i>Sepia pharaonis</i>       |
| <i>Sepia lycidas</i>           | AB192337 | <i>Sepia lycidas</i>            | correct | correct   | correct   | correct | correct   | correct   | <i>Sepia pharaonis</i>       |
| <i>Sepia lycidas</i>           | AB675088 | <i>Sepia lycidas</i>            | correct | correct   | correct   | correct | correct   | correct   | <i>Sepia pharaonis</i>       |
| <i>Sepia madokai</i>           | AB430407 | <i>Sepiola birostrata</i>       | no id   | no id     | no id     | no id   | no id     | no id     | <i>Sepia lorigera</i>        |

|                                |          |                                |         |         |           |         |           |           |                                    |
|--------------------------------|----------|--------------------------------|---------|---------|-----------|---------|-----------|-----------|------------------------------------|
| <i>Sepia pardex</i>            | AB193809 | <i>Sepia aureomaculata</i>     | no id   | no id   | no id     | no id   | no id     | no id     | <i>Sepia aureomaculata</i>         |
| <i>Sepia peterseni</i>         | AB192339 | <i>Sepia andreana</i>          | no id   | no id   | incorrect | no id   | no id     | incorrect | <i>Sepia andreana</i>              |
| <i>Sepia pharaonis</i>         | HQ846093 | <i>Sepia pharaonis</i>         | correct | correct | correct   | correct | correct   | correct   | <i>Sepia pharaonis</i>             |
| <i>Sepia pharaonis</i>         | JN315869 | <i>Sepia pharaonis</i>         | correct | correct | correct   | correct | correct   | correct   | <i>Sepia pharaonis</i>             |
| <i>Sepia pharaonis</i>         | JN315870 | <i>Sepia pharaonis</i>         | correct | correct | correct   | correct | correct   | correct   | <i>Sepia pharaonis</i>             |
| <i>Sepia pharaonis</i>         | JN315871 | <i>Sepia pharaonis</i>         | correct | correct | correct   | correct | correct   | correct   | <i>Sepia pharaonis</i>             |
| <i>Sepia pharaonis</i>         | JN315872 | <i>Sepia pharaonis</i>         | correct | correct | correct   | correct | correct   | correct   | <i>Sepia pharaonis</i>             |
| <i>Sepia pharaonis</i>         | JN315873 | <i>Sepia pharaonis</i>         | correct | correct | correct   | correct | correct   | correct   | <i>Sepia pharaonis</i>             |
| <i>Sepia pharaonis</i>         | JN315874 | <i>Sepia pharaonis</i>         | correct | correct | correct   | correct | correct   | correct   | <i>Sepia pharaonis</i>             |
| <i>Sepia recurvirostra</i>     | HQ846092 | <i>Sepia recurvirostra</i>     | correct | correct | correct   | correct | correct   | correct   | <i>Sepia recurvirostra</i>         |
| <i>Sepia recurvirostra</i>     | HQ846161 | <i>Sepia recurvirostra</i>     | correct | correct | correct   | correct | correct   | correct   | <i>Sepia recurvirostra</i>         |
| <i>Sepia recurvirostra</i>     | HQ846162 | <i>Sepia recurvirostra</i>     | correct | correct | correct   | correct | correct   | correct   | <i>Sepia recurvirostra</i>         |
| <i>Sepia subtenuipes</i>       | AB430414 | <i>Octopus oliveri</i>         | no id   | no id   | incorrect | no id   | no id     | incorrect | <i>Octopus conispadiceus</i>       |
| <i>Sepia tenuipes</i>          | AB430411 | <i>Sepia lycidas</i>           | no id   | no id   | no id     | no id   | no id     | no id     | <i>Sepia bertheloti</i>            |
| <i>Sepia tokioensis</i>        | AB430412 | <i>Sepia andreana</i>          | no id   | no id   | incorrect | no id   | no id     | incorrect | <i>Sepia andreana</i>              |
| <i>Sepiella inermis</i>        | HQ846080 | <i>Sepiella inermis</i>        | no id   | correct | correct   | no id   | correct   | correct   | <i>Sepiella inermis</i>            |
| <i>Sepiella inermis</i>        | HQ846081 | <i>Sepiella inermis</i>        | no id   | correct | correct   | no id   | correct   | correct   | <i>Sepiella inermis</i>            |
| <i>Sepiella maindroni</i>      | AB192341 | <i>Sepiella inermis</i>        | correct | correct | correct   | correct | ambiguous | ambiguous | <i>Sepiella inermis</i>            |
| <i>Sepiella maindroni</i>      | AF346853 | <i>Sepiella inermis</i>        | correct | correct | correct   | correct | ambiguous | ambiguous | <i>Sepiella inermis</i>            |
| <i>Sepiella japonica</i>       | HQ846078 | <i>Sepiella japonica</i>       | correct | correct | correct   | correct | ambiguous | ambiguous | <i>Sepiella inermis</i>            |
| <i>Sepiella japonica</i>       | HQ846079 | <i>Sepiella japonica</i>       | correct | correct | correct   | correct | ambiguous | ambiguous | <i>Sepiella inermis</i>            |
| <i>Sepiella japonica</i>       | HQ846082 | <i>Sepiella japonica</i>       | correct | correct | correct   | correct | ambiguous | ambiguous | <i>Sepiella inermis</i>            |
| <i>Sepiola birostrata</i>      | HQ846094 | <i>Sepiola birostrata</i>      | correct | correct | correct   | correct | correct   | correct   | <i>Sepiola pfefferi</i>            |
| <i>Sepiola birostrata</i>      | HQ846095 | <i>Sepiola birostrata</i>      | correct | correct | correct   | correct | correct   | correct   | <i>Sepiola pfefferi</i>            |
| <i>Sepiola birostrata</i>      | HQ846096 | <i>Sepiola birostrata</i>      | correct | correct | correct   | correct | correct   | correct   | <i>Sepiola pfefferi</i>            |
| <i>Sepiola birostrata</i>      | HQ846097 | <i>Sepiola birostrata</i>      | correct | correct | correct   | correct | correct   | correct   | <i>Sepiola pfefferi</i>            |
| <i>Sepiola birostrata</i>      | HQ846098 | <i>Sepiola birostrata</i>      | correct | correct | correct   | correct | correct   | correct   | <i>Sepiola pfefferi</i>            |
| <i>Sepiolina nipponensis</i>   | AB591073 | <i>Architeuthis dux</i>        | no id   | no id   | no id     | no id   | no id     | no id     | <i>Stoloteuthis japonica</i>       |
| <i>Sepiolina petasa</i>        | AB591071 | <i>Octopus longispadiceus</i>  | no id   | no id   | no id     | no id   | no id     | no id     | <i>Sepiola pfefferi</i>            |
| <i>Sepioteuthis lessoniana</i> | AB986213 | <i>Sepioteuthis lessoniana</i> | correct | correct | correct   | correct | correct   | correct   | <i>Sepioteuthis cf. lessoniana</i> |
| <i>Sepioteuthis lessoniana</i> | AB986214 | <i>Sepioteuthis lessoniana</i> | correct | correct | correct   | correct | correct   | correct   | <i>Sepioteuthis cf. lessoniana</i> |



|                                |          |                                |         |         |         |         |         |         |                                |
|--------------------------------|----------|--------------------------------|---------|---------|---------|---------|---------|---------|--------------------------------|
| <i>Sinonovacula constricta</i> | JN859989 | <i>Sinonovacula constricta</i> | correct | correct | correct | correct | correct | correct | <i>Sinonovacula constricta</i> |
| <i>Sinonovacula constricta</i> | JN859991 | <i>Sinonovacula constricta</i> | correct | correct | correct | correct | correct | correct | <i>Sinonovacula constricta</i> |
| <i>Sinonovacula constricta</i> | JN859993 | <i>Sinonovacula constricta</i> | correct | correct | correct | correct | correct | correct | <i>Sinonovacula constricta</i> |
| <i>Sinonovacula constricta</i> | HM180885 | <i>Sinonovacula constricta</i> | correct | correct | correct | correct | correct | correct | <i>Sinonovacula constricta</i> |
| <i>Sinonovacula constricta</i> | HM180886 | <i>Sinonovacula constricta</i> | correct | correct | correct | correct | correct | correct | <i>Sinonovacula constricta</i> |
| <i>Siphonaria japonica</i>     | KF716648 | <i>Siphonaria japonica</i>     | no id   | correct | correct | no id   | correct | correct | <i>Limax cf. cinereoniger</i>  |
| <i>Siphonaria japonica</i>     | KF716623 | <i>Siphonaria japonica</i>     | correct | correct | correct | correct | correct | correct | <i>Limax cf. cinereoniger</i>  |
| <i>Siphonaria japonica</i>     | KF716594 | <i>Siphonaria japonica</i>     | correct | correct | correct | correct | correct | correct | <i>Limax cf. cinereoniger</i>  |
| <i>Siphonaria japonica</i>     | KF716568 | <i>Siphonaria japonica</i>     | correct | correct | correct | correct | correct | correct | <i>Limax cf. cinereoniger</i>  |
| <i>Siphonaria japonica</i>     | KF716536 | <i>Siphonaria japonica</i>     | correct | correct | correct | correct | correct | correct | <i>Limax cf. cinereoniger</i>  |
| <i>Siphonaria japonica</i>     | KF716747 | <i>Siphonaria japonica</i>     | correct | correct | correct | correct | correct | correct | <i>Limax cf. cinereoniger</i>  |
| <i>Siphonaria japonica</i>     | KF716745 | <i>Siphonaria japonica</i>     | no id   | correct | correct | no id   | correct | correct | <i>Limax cf. cinereoniger</i>  |
| <i>Siphonaria japonica</i>     | KF716718 | <i>Siphonaria japonica</i>     | correct | correct | correct | correct | correct | correct | <i>Limax cf. cinereoniger</i>  |
| <i>Siphonaria japonica</i>     | KF716717 | <i>Siphonaria japonica</i>     | correct | correct | correct | correct | correct | correct | <i>Limax cf. cinereoniger</i>  |
| <i>Siphonaria japonica</i>     | KF716701 | <i>Siphonaria japonica</i>     | correct | correct | correct | correct | correct | correct | <i>Limax cf. cinereoniger</i>  |
| <i>Siphonaria japonica</i>     | KF716700 | <i>Siphonaria japonica</i>     | correct | correct | correct | correct | correct | correct | <i>Limax cf. cinereoniger</i>  |
| <i>Siphonaria japonica</i>     | KF716679 | <i>Siphonaria japonica</i>     | correct | correct | correct | correct | correct | correct | <i>Limax cf. cinereoniger</i>  |
| <i>Solariella nyssonus</i>     | HF586294 | <i>Solariella nyssonus</i>     | correct | correct | correct | correct | correct | correct | <i>Minolia sp.</i>             |
| <i>Solariella nyssonus</i>     | HF586295 | <i>Solariella nyssonus</i>     | correct | correct | correct | correct | correct | correct | <i>Minolia sp.</i>             |
| <i>Solecortus divaricatus</i>  | JN859983 | <i>Solecortus divaricatus</i>  | no id   | no id   | no id   | no id   | no id   | no id   | <i>Solecortus divaricatus</i>  |
| <i>Solen grandis</i>           | JN860010 | <i>Solen grandis</i>           | no id   | no id   | no id   | no id   | no id   | no id   | <i>Solen regularis</i>         |
| <i>Solen grandis</i>           | JN860011 | <i>Solen grandis</i>           | correct | correct | correct | correct | correct | correct | <i>Solen sarawakensis</i>      |
| <i>Solen grandis</i>           | JN860012 | <i>Solen grandis</i>           | correct | correct | correct | correct | correct | correct | <i>Solen sarawakensis</i>      |
| <i>Solen strictus</i>          | JN860006 | <i>Solen strictus</i>          | correct | correct | correct | correct | correct | correct | <i>Solen strictus</i>          |
| <i>Solen strictus</i>          | JN860007 | <i>Solen strictus</i>          | correct | correct | correct | correct | correct | correct | <i>Solen strictus</i>          |
| <i>Solen strictus</i>          | JN860008 | <i>Solen strictus</i>          | no id   | correct | correct | no id   | correct | correct | <i>Solen strictus</i>          |
| <i>Solen strictus</i>          | JN860009 | <i>Solen strictus</i>          | no id   | no id   | no id   | no id   | no id   | no id   | <i>Solen strictus</i>          |
| <i>Stiliger ornatus</i>        | AB501311 | <i>Elysia ornata</i>           | no id   | no id   | no id   | no id   | no id   | no id   | <i>Stiliger ornatus</i>        |
| <i>Stiliger smaragdinus</i>    | AB501310 | <i>Thuridilla gracilis</i>     | no id   | no id   | no id   | no id   | no id   | no id   | <i>Elysia translucens</i>      |
| <i>Stomatella impertusa</i>    | AB505292 | <i>Stomatia phymotis</i>       | no id   | no id   | no id   | no id   | no id   | no id   | <i>Stomatella impertusa</i>    |
| <i>Stomatella planulata</i>    | AB505293 | <i>Stomatella planulata</i>    | correct | correct | correct | correct | correct | correct | <i>Stomatella planulata</i>    |

|                                     |          |                                     |         |           |           |         |           |           |           |                             |
|-------------------------------------|----------|-------------------------------------|---------|-----------|-----------|---------|-----------|-----------|-----------|-----------------------------|
| <i>Stomatella planulata</i>         | EU530132 | <i>Stomatella planulata</i>         | correct | correct   | correct   | correct | correct   | correct   | correct   | <i>Stomatella planulata</i> |
| <i>Stomatella planulata</i>         | EU530131 | <i>Stomatella planulata</i>         | correct | correct   | correct   | correct | correct   | correct   | correct   | <i>Stomatella planulata</i> |
| <i>Stomatella planulata</i>         | EU530130 | <i>Stomatella planulata</i>         | correct | correct   | correct   | correct | correct   | correct   | correct   | <i>Stomatella planulata</i> |
| <i>Stomatia obscura</i>             | AB505294 | <i>Littorina brevicula</i>          | no id   | no id     | no id     | no id   | no id     | no id     | no id     | <i>Stomatia phymotis</i>    |
| <i>Stomatia phymotis</i>            | AB365223 | <i>Stomatella impertusa</i>         | no id   | no id     | no id     | no id   | no id     | no id     | no id     | <i>Stomatia phymotis</i>    |
| <i>Strombus lentiginosu</i>         | JF693421 | <i>Strombus lentiginosu</i>         | correct | correct   | correct   | correct | ambiguous | ambiguous | ambiguous | <i>Volutidae sp.</i>        |
| <i>Strombus lentiginosu</i>         | JF693422 | <i>Strombus lentiginosu</i>         | correct | correct   | correct   | correct | ambiguous | ambiguous | ambiguous | <i>Volutidae sp.</i>        |
| <i>Strombus mutabiis</i>            | JF693420 | <i>Strombus lentiginosu</i>         | no id   | incorrect | incorrect | no id   | incorrect | incorrect | incorrect | <i>Volutidae sp.</i>        |
| <i>Strombus luhuanus</i>            | JF693429 | <i>Strombus luhuanus</i>            | correct | correct   | correct   | correct | correct   | correct   | correct   | <i>Strombus persicus</i>    |
| <i>Strombus luhuanus</i>            | JF693430 | <i>Strombus luhuanus</i>            | correct | correct   | correct   | correct | correct   | correct   | correct   | <i>Strombus persicus</i>    |
| <i>Strombus luhuanus</i>            | JF693431 | <i>Strombus luhuanus</i>            | correct | correct   | correct   | correct | correct   | correct   | correct   | <i>Strombus persicus</i>    |
| <i>Strombus luhuanus</i>            | JF693432 | <i>Strombus luhuanus</i>            | correct | correct   | correct   | correct | correct   | correct   | correct   | <i>Strombus persicus</i>    |
| <i>Strombus marginatus robustus</i> | JF693426 | <i>Strombus marginatus robustus</i> | no id   | correct   | correct   | no id   | correct   | correct   | correct   | <i>Strombus vittatus</i>    |
| <i>Strombus marginatus robustus</i> | JF693427 | <i>Strombus marginatus robustus</i> | correct | correct   | correct   | correct | correct   | correct   | correct   | <i>Strombus vittatus</i>    |
| <i>Strombus marginatus robustus</i> | JF693428 | <i>Strombus marginatus robustus</i> | correct | correct   | correct   | correct | correct   | correct   | correct   | <i>Strombus vittatus</i>    |
| <i>Strombus marginatus robustus</i> | JF693436 | <i>Strombus marginatus robustus</i> | no id   | correct   | correct   | no id   | correct   | correct   | correct   | <i>Strombus vittatus</i>    |
| <i>Strombus marginatus robustus</i> | JF693437 | <i>Strombus marginatus robustus</i> | correct | correct   | correct   | correct | correct   | correct   | correct   | <i>Strombus vittatus</i>    |
| <i>Strombus urceus</i>              | JF693423 | <i>Strombus urceus</i>              | correct | correct   | correct   | correct | correct   | correct   | correct   | <i>Strombus urceus</i>      |
| <i>Strombus urceus</i>              | JF693424 | <i>Strombus urceus</i>              | correct | correct   | correct   | correct | correct   | correct   | correct   | <i>Strombus urceus</i>      |
| <i>Strombus urceus</i>              | JF693425 | <i>Strombus urceus</i>              | correct | correct   | correct   | correct | correct   | correct   | correct   | <i>Strombus urceus</i>      |
| <i>Strombus vittatus</i>            | JF693433 | <i>Strombus vittatus</i>            | no id   | correct   | correct   | no id   | correct   | correct   | correct   | <i>Strombus vittatus</i>    |
| <i>Strombus vittatus</i>            | JF693434 | <i>Strombus vittatus</i>            | correct | correct   | correct   | correct | correct   | correct   | correct   | <i>Strombus vittatus</i>    |
| <i>Strombus vittatus</i>            | JF693435 | <i>Strombus vittatus</i>            | correct | correct   | correct   | correct | correct   | correct   | correct   | <i>Strombus vittatus</i>    |
| <i>Tambja amakusana</i>             | EF142877 | <i>Tambja limaciformis</i>          | no id   | no id     | no id     | no id   | no id     | no id     | no id     | <i>Tambja limaciformis</i>  |
| <i>Tambja limaciformis</i>          | EF142878 | <i>Tambja amakusana</i>             | no id   | no id     | no id     | no id   | no id     | no id     | no id     | <i>Gastropoda sp.</i>       |
| <i>Tambja morosa</i>                | EF142867 | <i>Tambja sagamiana</i>             | no id   | no id     | no id     | no id   | no id     | no id     | no id     | <i>Tambja victoriae</i>     |
| <i>Tambja sagamiana</i>             | EF142870 | <i>Tambja morosa</i>                | no id   | no id     | no id     | no id   | no id     | no id     | no id     | <i>Tambja eliora</i>        |
| <i>Tapes dorsatus</i>               | HQ703224 | <i>Tapes dorsatus</i>               | correct | correct   | correct   | correct | correct   | correct   | correct   | <i>Marcia marmorata</i>     |
| <i>Tapes dorsatus</i>               | HQ703225 | <i>Tapes dorsatus</i>               | correct | correct   | correct   | correct | correct   | correct   | correct   | <i>Marcia marmorata</i>     |
| <i>Tapes dorsatus</i>               | HQ703226 | <i>Tapes dorsatus</i>               | correct | correct   | correct   | correct | correct   | correct   | correct   | <i>Marcia marmorata</i>     |
| <i>Tapes dorsatus</i>               | HQ703227 | <i>Tapes dorsatus</i>               | correct | correct   | correct   | correct | correct   | correct   | correct   | <i>Marcia marmorata</i>     |



|                             |          |                                 |           |           |           |           |           |           |                             |
|-----------------------------|----------|---------------------------------|-----------|-----------|-----------|-----------|-----------|-----------|-----------------------------|
| <i>Tegillarca nodifera</i>  | KU341906 | <i>Tegillarca nodifera</i>      | correct   | correct   | correct   | correct   | correct   | correct   |                             |
| <i>Tegillarca nodifera</i>  | KU341907 | <i>Tegillarca nodifera</i>      | correct   | correct   | correct   | correct   | correct   | correct   |                             |
| <i>Tegillarca nodifera</i>  | KU341908 | <i>Tegillarca nodifera</i>      | correct   | correct   | correct   | correct   | correct   | correct   |                             |
| <i>Tegillarca nodifera</i>  | KU341909 | <i>Tegillarca nodifera</i>      | correct   | correct   | correct   | correct   | correct   | correct   |                             |
| <i>Terebralia palustris</i> | HE680652 | <i>Cerithidea rhizophorarum</i> | no id     | no id     | no id     | no id     | no id     | no id     | <i>Terebralia palustris</i> |
| <i>Terebralia sulcata</i>   | HE680669 | <i>Terebralia sulcata</i>       | correct   | correct   | correct   | correct   | correct   | correct   | <i>Terebralia sulcata</i>   |
| <i>Terebralia sulcata</i>   | HE680670 | <i>Terebralia sulcata</i>       | correct   | correct   | correct   | correct   | correct   | correct   | <i>Terebralia sulcata</i>   |
| <i>Terebralia sulcata</i>   | HE680663 | <i>Terebralia sulcata</i>       | no id     | correct   | correct   | no id     | correct   | correct   | <i>Terebralia sulcata</i>   |
| <i>Terebralia sulcata</i>   | HE680630 | <i>Terebralia sulcata</i>       | correct   | correct   | correct   | correct   | correct   | correct   | <i>Terebralia sulcata</i>   |
| <i>Terebralia sulcata</i>   | HE680667 | <i>Terebralia sulcata</i>       | correct   | correct   | correct   | correct   | correct   | correct   | <i>Terebralia sulcata</i>   |
| <i>Terebralia sulcata</i>   | HE680668 | <i>Terebralia sulcata</i>       | correct   | correct   | correct   | correct   | correct   | correct   | <i>Terebralia sulcata</i>   |
| <i>Terebralia sulcata</i>   | HE680671 | <i>Terebralia sulcata</i>       | correct   | correct   | correct   | correct   | correct   | correct   | <i>Terebralia sulcata</i>   |
| <i>Thais clavigera</i>      | GU188218 | <i>Thais clavigera</i>          | ambiguous | ambiguous | ambiguous | ambiguous | ambiguous | ambiguous | <i>Thais luteostoma</i>     |
| <i>Thais clavigera</i>      | GU188213 | <i>Thais clavigera</i>          | ambiguous | ambiguous | ambiguous | ambiguous | ambiguous | ambiguous | <i>Thais luteostoma</i>     |
| <i>Thais clavigera</i>      | GU188214 | <i>Thais clavigera</i>          | ambiguous | ambiguous | ambiguous | ambiguous | ambiguous | ambiguous | <i>Thais luteostoma</i>     |
| <i>Thais clavigera</i>      | GU188212 | <i>Thais clavigera</i>          | ambiguous | ambiguous | ambiguous | ambiguous | ambiguous | ambiguous | <i>Thais luteostoma</i>     |
| <i>Thais clavigera</i>      | GU188216 | <i>Thais clavigera</i>          | ambiguous | ambiguous | ambiguous | ambiguous | ambiguous | ambiguous | <i>Thais luteostoma</i>     |
| <i>Thais clavigera</i>      | GU188217 | <i>Thais clavigera</i>          | ambiguous | ambiguous | ambiguous | ambiguous | ambiguous | ambiguous | <i>Thais luteostoma</i>     |
| <i>Thais clavigera</i>      | HM180817 | <i>Thais clavigera</i>          | ambiguous | ambiguous | ambiguous | ambiguous | ambiguous | ambiguous | <i>Thais luteostoma</i>     |
| <i>Thais clavigera</i>      | HM180818 | <i>Thais clavigera</i>          | ambiguous | ambiguous | ambiguous | ambiguous | ambiguous | ambiguous | <i>Thais luteostoma</i>     |
| <i>Thais clavigera</i>      | HM180819 | <i>Thais clavigera</i>          | ambiguous | ambiguous | ambiguous | ambiguous | ambiguous | ambiguous | <i>Thais luteostoma</i>     |
| <i>Thais clavigera</i>      | HM180820 | <i>Thais clavigera</i>          | ambiguous | ambiguous | ambiguous | ambiguous | ambiguous | ambiguous | <i>Thais luteostoma</i>     |
| <i>Thais clavigera</i>      | HM180821 | <i>Thais clavigera</i>          | ambiguous | ambiguous | ambiguous | ambiguous | ambiguous | ambiguous | <i>Thais luteostoma</i>     |
| <i>Thais luteostoma</i>     | HM180831 | <i>Thais clavigera</i>          | incorrect | incorrect | incorrect | incorrect | incorrect | ambiguous | <i>Thais luteostoma</i>     |
| <i>Reishia bronni</i>       | HE584369 | <i>Thais luteostoma</i>         | ambiguous | ambiguous | ambiguous | ambiguous | ambiguous | ambiguous | <i>Reishia clavigera</i>    |
| <i>Reishia bronni</i>       | HE584368 | <i>Thais luteostoma</i>         | ambiguous | ambiguous | ambiguous | ambiguous | ambiguous | ambiguous | <i>Reishia clavigera</i>    |
| <i>Reishia bronni</i>       | FR695722 | <i>Thais luteostoma</i>         | ambiguous | ambiguous | ambiguous | ambiguous | ambiguous | ambiguous | <i>Reishia clavigera</i>    |
| <i>Thais luteostoma</i>     | GU188232 | <i>Thais luteostoma</i>         | ambiguous | ambiguous | ambiguous | ambiguous | ambiguous | ambiguous | <i>Reishia clavigera</i>    |
| <i>Thais luteostoma</i>     | GU188233 | <i>Thais luteostoma</i>         | ambiguous | ambiguous | ambiguous | ambiguous | ambiguous | ambiguous | <i>Reishia clavigera</i>    |
| <i>Thais luteostoma</i>     | GU188234 | <i>Thais luteostoma</i>         | correct   | correct   | correct   | correct   | ambiguous | ambiguous | <i>Reishia clavigera</i>    |
| <i>Thais luteostoma</i>     | GU188235 | <i>Thais luteostoma</i>         | ambiguous | ambiguous | ambiguous | ambiguous | ambiguous | ambiguous | <i>Reishia clavigera</i>    |



|                             |          |                              |           |           |           |           |           |           |                            |
|-----------------------------|----------|------------------------------|-----------|-----------|-----------|-----------|-----------|-----------|----------------------------|
| <i>Thais luteostoma</i>     | GU188236 | <i>Thais luteostoma</i>      | correct   | correct   | correct   | correct   | ambiguous | ambiguous | <i>Reishia clavigera</i>   |
| <i>Thais luteostoma</i>     | GU188237 | <i>Thais luteostoma</i>      | ambiguous | ambiguous | ambiguous | ambiguous | ambiguous | ambiguous | <i>Reishia clavigera</i>   |
| <i>Thais luteostoma</i>     | HE584372 | <i>Thais luteostoma</i>      | no id     | ambiguous | ambiguous | no id     | ambiguous | ambiguous | <i>Reishia clavigera</i>   |
| <i>Thais luteostoma</i>     | HM180822 | <i>Thais luteostoma</i>      | no id     | ambiguous | ambiguous | no id     | ambiguous | ambiguous | <i>Reishia clavigera</i>   |
| <i>Thais luteostoma</i>     | HM180823 | <i>Thais luteostoma</i>      | ambiguous | ambiguous | ambiguous | ambiguous | ambiguous | ambiguous | <i>Reishia clavigera</i>   |
| <i>Thais luteostoma</i>     | HM180824 | <i>Thais luteostoma</i>      | ambiguous | ambiguous | ambiguous | ambiguous | ambiguous | ambiguous | <i>Reishia clavigera</i>   |
| <i>Thais luteostoma</i>     | HM180825 | <i>Thais luteostoma</i>      | ambiguous | ambiguous | ambiguous | ambiguous | ambiguous | ambiguous | <i>Reishia clavigera</i>   |
| <i>Thais luteostoma</i>     | HM180826 | <i>Thais luteostoma</i>      | ambiguous | ambiguous | ambiguous | ambiguous | ambiguous | ambiguous | <i>Reishia clavigera</i>   |
| <i>Thais luteostoma</i>     | HM180827 | <i>Thais luteostoma</i>      | ambiguous | ambiguous | ambiguous | ambiguous | ambiguous | ambiguous | <i>Reishia clavigera</i>   |
| <i>Thais luteostoma</i>     | HM180828 | <i>Thais luteostoma</i>      | ambiguous | ambiguous | ambiguous | ambiguous | ambiguous | ambiguous | <i>Reishia clavigera</i>   |
| <i>Thais luteostoma</i>     | HM180829 | <i>Thais luteostoma</i>      | ambiguous | ambiguous | ambiguous | ambiguous | ambiguous | ambiguous | <i>Reishia clavigera</i>   |
| <i>Thais luteostoma</i>     | HM180830 | <i>Thais luteostoma</i>      | ambiguous | ambiguous | ambiguous | ambiguous | ambiguous | ambiguous | <i>Reishia clavigera</i>   |
| <i>Thais gradata</i>        | GU188228 | <i>Thais gradata</i>         | correct   | correct   | correct   | correct   | correct   | correct   | <i>Thais javanica</i>      |
| <i>Thais gradata</i>        | GU188229 | <i>Thais gradata</i>         | correct   | correct   | correct   | correct   | correct   | correct   | <i>Thais javanica</i>      |
| <i>Thais javanica</i>       | GU188230 | <i>Thais javanica</i>        | correct   | correct   | correct   | correct   | correct   | correct   | <i>Thais sp.</i>           |
| <i>Thais javanica</i>       | GU188231 | <i>Thais javanica</i>        | correct   | correct   | correct   | correct   | correct   | correct   | <i>Thais sp.</i>           |
| <i>Thais mutabilis</i>      | GU188248 | <i>Thais mutabilis</i>       | correct   | correct   | correct   | correct   | correct   | correct   | <i>Drupella rugosa</i>     |
| <i>Thais mutabilis</i>      | GU188249 | <i>Thais mutabilis</i>       | correct   | correct   | correct   | correct   | correct   | correct   | <i>Drupella rugosa</i>     |
| <i>Thais mutabilis</i>      | GU188250 | <i>Thais mutabilis</i>       | correct   | correct   | correct   | correct   | correct   | correct   | <i>Drupella rugosa</i>     |
| <i>Thais mutabilis</i>      | GU188251 | <i>Thais mutabilis</i>       | correct   | correct   | correct   | correct   | correct   | correct   | <i>Drupella rugosa</i>     |
| <i>Thais mutabilis</i>      | GU188252 | <i>Thais mutabilis</i>       | correct   | correct   | correct   | correct   | correct   | correct   | <i>Drupella rugosa</i>     |
| <i>Thais mutabilis</i>      | GU188253 | <i>Thais mutabilis</i>       | correct   | correct   | correct   | correct   | correct   | correct   | <i>Drupella rugosa</i>     |
| <i>Thuridilla gracilis</i>  | AB758972 | <i>Stiliger smaragdinus</i>  | no id     | no id     | no id     | no id     | no id     | no id     | <i>Thuridilla bayeri</i>   |
| <i>Thuridilla splendens</i> | AB758973 | <i>Thuridilla gracilis</i>   | no id     | no id     | no id     | no id     | no id     | no id     | <i>Thuridilla gracilis</i> |
| <i>Tonna dolium</i>         | JF693441 | <i>Tonna dolium</i>          | correct   | correct   | correct   | correct   | correct   | correct   | <i>Tonna galea</i>         |
| <i>Tonna dolium</i>         | JF693442 | <i>Tonna dolium</i>          | correct   | correct   | correct   | correct   | correct   | correct   | <i>Tonna galea</i>         |
| <i>Tonna olearium</i>       | JF693438 | <i>Tonna olearium</i>        | no id     | correct   | correct   | no id     | correct   | correct   | <i>Tonna galea</i>         |
| <i>Tonna olearium</i>       | JF693439 | <i>Tonna olearium</i>        | no id     | correct   | correct   | no id     | correct   | correct   | <i>Tonna galea</i>         |
| <i>Tonna sulcosa</i>        | JF693440 | <i>Duplicaria dussumieri</i> | no id     | no id     | no id     | no id     | no id     | no id     | <i>Crosseana crosseana</i> |
| <i>Trisidos kiyonoi</i>     | HQ258842 | <i>Trisidos kiyonoi</i>      | no id     | no id     | correct   | no id     | no id     | correct   |                            |
| <i>Trisidos kiyonoi</i>     | HQ258843 | <i>Trisidos kiyonoi</i>      | no id     | correct   | correct   | no id     | correct   | correct   |                            |

|                           |          |                                     |         |         |           |         |         |           |                           |
|---------------------------|----------|-------------------------------------|---------|---------|-----------|---------|---------|-----------|---------------------------|
| <i>Trisidos kiyonoi</i>   | KU341930 | <i>Trisidos kiyonoi</i>             | correct | correct | correct   | correct | correct | correct   |                           |
| <i>Trisidos kiyonoi</i>   | KU341931 | <i>Trisidos kiyonoi</i>             | correct | correct | correct   | correct | correct | correct   |                           |
| <i>Trisidos kiyonoi</i>   | HQ258845 | <i>Trisidos kiyonoi</i>             | correct | correct | correct   | correct | correct | correct   |                           |
| <i>Trisidos kiyonoi</i>   | HQ258846 | <i>Trisidos kiyonoi</i>             | no id   | correct | correct   | no id   | correct | correct   |                           |
| <i>Trochus histrio</i>    | AB505300 | <i>Conotalopia mustelina</i>        | no id   | no id   | no id     | no id   | no id   | no id     | <i>Trochus stellatus</i>  |
| <i>Trochus maculatus</i>  | EU530134 | <i>Trochus maculatus</i>            | correct | correct | correct   | correct | correct | correct   | <i>Trochus stellatus</i>  |
| <i>Trochus maculatus</i>  | AB365224 | <i>Trochus maculatus</i>            | no id   | no id   | correct   | no id   | no id   | correct   | <i>Trochus stellatus</i>  |
| <i>Trochus maculatus</i>  | AB505301 | <i>Trochus maculatus</i>            | correct | correct | correct   | correct | correct | correct   | <i>Trochus stellatus</i>  |
| <i>Trochus stellatus</i>  | EU530135 | <i>Trochus maculatus</i>            | no id   | no id   | no id     | no id   | no id   | no id     | <i>Trochus histrio</i>    |
| <i>Turritella terebra</i> | JF693443 | <i>Turritella terebra</i>           | correct | correct | correct   | correct | correct | correct   | <i>Turritellidae sp.</i>  |
| <i>Turritella terebra</i> | JF693444 | <i>Turritella terebra</i>           | correct | correct | correct   | correct | correct | correct   | <i>Turritellidae sp.</i>  |
| <i>Turritella terebra</i> | JF693445 | <i>Turritella terebra</i>           | correct | correct | correct   | correct | correct | correct   | <i>Turritellidae sp.</i>  |
| <i>Turritella terebra</i> | JF693446 | <i>Turritella terebra</i>           | no id   | correct | correct   | no id   | correct | correct   | <i>Turritellidae sp.</i>  |
| <i>Turritella terebra</i> | JF693447 | <i>Turritella terebra</i>           | correct | correct | correct   | correct | correct | correct   | <i>Turritellidae sp.</i>  |
| <i>Turbo argyrostomus</i> | AM403899 | <i>Turbo cornutus</i>               | no id   | no id   | incorrect | no id   | no id   | incorrect | <i>Turbo sp.</i>          |
| <i>Turbo chrysostomus</i> | AM403903 | <i>Turbo setosus</i>                | no id   | no id   | no id     | no id   | no id   | no id     | <i>Turbinidae sp.</i>     |
| <i>Turbo cornutus</i>     | AM403882 | <i>Turbo cornutus</i>               | correct | correct | correct   | correct | correct | correct   | <i>Turbo marmoratus</i>   |
| <i>Turbo cornutus</i>     | AM403881 | <i>Turbo cornutus</i>               | correct | correct | correct   | correct | correct | correct   | <i>Turbo marmoratus</i>   |
| <i>Turbo cornutus</i>     | HM180932 | <i>Turbo cornutus</i>               | no id   | correct | correct   | no id   | correct | ambiguous | <i>Turbo marmoratus</i>   |
| <i>Turbo cornutus</i>     | HM180933 | <i>Turbo cornutus</i>               | no id   | correct | correct   | no id   | correct | correct   | <i>Turbo marmoratus</i>   |
| <i>Turbo cornutus</i>     | HM180934 | <i>Turbo cornutus</i>               | no id   | correct | correct   | no id   | correct | correct   | <i>Turbo marmoratus</i>   |
| <i>Turbo marmoratus</i>   | AM403895 | <i>Turbo marmoratus</i>             | correct | correct | correct   | correct | correct | correct   | <i>Turbo cornutus</i>     |
| <i>Turbo marmoratus</i>   | AM403894 | <i>Turbo marmoratus</i>             | correct | correct | correct   | correct | correct | correct   | <i>Turbo cornutus</i>     |
| <i>Turbo petholatus</i>   | AM049383 | <i>Turbo marmoratus</i>             | no id   | no id   | no id     | no id   | no id   | no id     | <i>Turbo petholatus</i>   |
| <i>Turbo reevii</i>       | AM403878 | <i>Echinolittorina trochoides E</i> | no id   | no id   | no id     | no id   | no id   | no id     | <i>Gastropoda sp.</i>     |
| <i>Turbo setosus</i>      | AM403909 | <i>Turbo argyrostomus</i>           | no id   | no id   | no id     | no id   | no id   | no id     | <i>Turbo setosus</i>      |
| <i>Turbo stenogyrus</i>   | AM403916 | <i>Turbo stenogyrus</i>             | correct | correct | correct   | correct | correct | correct   | <i>Turbo tuberculosus</i> |
| <i>Turbo stenogyrus</i>   | AM403915 | <i>Turbo stenogyrus</i>             | correct | correct | correct   | correct | correct | correct   | <i>Turbo tuberculosus</i> |
| <i>Turricula javana</i>   | HQ834091 | <i>Duplicaria dussumieri</i>        | no id   | no id   | no id     | no id   | no id   | no id     | <i>Turricula javana</i>   |
| <i>Umbonium giganteum</i> | AB505314 | <i>Umbonium giganteum</i>           | correct | correct | correct   | correct | correct | correct   | <i>Umbonium costatum</i>  |
| <i>Umbonium giganteum</i> | AB505313 | <i>Umbonium giganteum</i>           | correct | correct | correct   | correct | correct | correct   | <i>Umbonium costatum</i>  |



|                                |          |                                |         |         |           |         |         |           |                               |
|--------------------------------|----------|--------------------------------|---------|---------|-----------|---------|---------|-----------|-------------------------------|
| <i>Uroteuthis edulis</i>       | KF032038 | <i>Uroteuthis edulis</i>       | correct | correct | correct   | correct | correct | correct   | <i>Uroteuthis edulis</i>      |
| <i>Uroteuthis edulis</i>       | KF032037 | <i>Uroteuthis edulis</i>       | correct | correct | correct   | correct | correct | correct   | <i>Uroteuthis edulis</i>      |
| <i>Uroteuthis edulis</i>       | EU349456 | <i>Uroteuthis edulis</i>       | correct | correct | correct   | correct | correct | correct   | <i>Uroteuthis edulis</i>      |
| <i>Uroteuthis edulis</i>       | EU349455 | <i>Uroteuthis edulis</i>       | correct | correct | correct   | correct | correct | correct   | <i>Uroteuthis edulis</i>      |
| <i>Uroteuthis edulis</i>       | EU349454 | <i>Uroteuthis edulis</i>       | correct | correct | correct   | correct | correct | correct   | <i>Uroteuthis edulis</i>      |
| <i>Uroteuthis edulis</i>       | EU349453 | <i>Uroteuthis edulis</i>       | correct | correct | correct   | correct | correct | correct   | <i>Uroteuthis edulis</i>      |
| <i>Uroteuthis edulis</i>       | EU349452 | <i>Uroteuthis edulis</i>       | correct | correct | correct   | correct | correct | correct   | <i>Uroteuthis edulis</i>      |
| <i>Uroteuthis edulis</i>       | EU349451 | <i>Uroteuthis edulis</i>       | correct | correct | correct   | correct | correct | correct   | <i>Uroteuthis edulis</i>      |
| <i>Uroteuthis edulis</i>       | EU349450 | <i>Uroteuthis edulis</i>       | correct | correct | correct   | correct | correct | correct   | <i>Uroteuthis edulis</i>      |
| <i>Uroteuthis edulis</i>       | EU349449 | <i>Uroteuthis edulis</i>       | correct | correct | correct   | correct | correct | correct   | <i>Uroteuthis edulis</i>      |
| <i>Uroteuthis edulis</i>       | EU349448 | <i>Uroteuthis edulis</i>       | correct | correct | correct   | correct | correct | correct   | <i>Uroteuthis edulis</i>      |
| <i>Uroteuthis edulis</i>       | EU349447 | <i>Uroteuthis edulis</i>       | correct | correct | correct   | correct | correct | correct   | <i>Uroteuthis edulis</i>      |
| <i>Varicinassa variciferus</i> | JQ975551 | <i>Varicinassa variciferus</i> | correct | correct | correct   | correct | correct | correct   | <i>Nassarius wolffi</i>       |
| <i>Varicinassa variciferus</i> | JQ975546 | <i>Varicinassa variciferus</i> | correct | correct | correct   | correct | correct | correct   | <i>Nassarius wolffi</i>       |
| <i>Varicinassa variciferus</i> | JQ975547 | <i>Varicinassa variciferus</i> | no id   | correct | correct   | no id   | correct | correct   | <i>Nassarius wolffi</i>       |
| <i>Varicinassa variciferus</i> | JQ975548 | <i>Varicinassa variciferus</i> | correct | correct | correct   | correct | correct | correct   | <i>Nassarius wolffi</i>       |
| <i>Varicinassa variciferus</i> | JQ975549 | <i>Varicinassa variciferus</i> | correct | correct | correct   | correct | correct | correct   | <i>Nassarius wolffi</i>       |
| <i>Varicinassa variciferus</i> | JQ975550 | <i>Varicinassa variciferus</i> | correct | correct | correct   | correct | correct | correct   | <i>Nassarius wolffi</i>       |
| <i>Vasticardium flavum</i>     | JN860016 | <i>Vasticardium flavum</i>     | correct | correct | correct   | correct | correct | correct   | <i>Vasticardium flavum</i>    |
| <i>Vasticardium flavum</i>     | JN860017 | <i>Vasticardium flavum</i>     | correct | correct | correct   | correct | correct | correct   | <i>Vasticardium flavum</i>    |
| <i>Vasticardium flavum</i>     | JN860018 | <i>Vasticardium flavum</i>     | correct | correct | correct   | correct | correct | correct   | <i>Vasticardium flavum</i>    |
| <i>Vasticardium flavum</i>     | JN860019 | <i>Vasticardium flavum</i>     | correct | correct | correct   | correct | correct | correct   | <i>Vasticardium flavum</i>    |
| <i>Vasticardium flavum</i>     | JN860020 | <i>Vasticardium flavum</i>     | no id   | correct | correct   | no id   | correct | correct   | <i>Vasticardium flavum</i>    |
| <i>Vasticardium flavum</i>     | JN860021 | <i>Vasticardium flavum</i>     | no id   | correct | correct   | no id   | correct | correct   | <i>Vasticardium flavum</i>    |
| <i>Vasum turbinellus</i>       | JN053025 | <i>Vasum turbinellus</i>       | correct | correct | correct   | correct | correct | correct   | <i>Vasum ceramicum</i>        |
| <i>Vasum turbinellus</i>       | HQ834084 | <i>Vasum turbinellus</i>       | correct | correct | correct   | correct | correct | correct   | <i>Vasum ceramicum</i>        |
| <i>Venerupis bruguieri</i>     | DQ184829 | <i>Ruditapes variegata</i>     | no id   | no id   | incorrect | no id   | no id   | incorrect | <i>Ruditapes variegatus</i>   |
| <i>Vepricardium coronatum</i>  | JN860013 | <i>Vepricardium coronatum</i>  | no id   | correct | correct   | no id   | correct | correct   | <i>Clinocardium nuttallii</i> |
| <i>Vepricardium coronatum</i>  | JN860014 | <i>Vepricardium coronatum</i>  | correct | correct | correct   | correct | correct | correct   | <i>Clinocardium nuttallii</i> |
| <i>Vepricardium coronatum</i>  | JN860015 | <i>Vepricardium coronatum</i>  | correct | correct | correct   | correct | correct | correct   | <i>Clinocardium nuttallii</i> |
| <i>Volachlamys hirasei</i>     | GU120001 | <i>Volachlamys hirasei</i>     | no id   | no id   | no id     | no id   | no id   | no id     |                               |

|                                     |          |                                    |         |         |         |         |         |         |                              |
|-------------------------------------|----------|------------------------------------|---------|---------|---------|---------|---------|---------|------------------------------|
| <i>Volachlamys hirasei</i>          | GU120002 | <i>Volachlamys hirasei</i>         | correct | correct | correct | correct | correct | correct |                              |
| <i>Volachlamys hirasei</i>          | GU120003 | <i>Volachlamys hirasei</i>         | correct | correct | correct | correct | correct | correct |                              |
| <i>Volachlamys hirasei</i>          | GU120004 | <i>Volachlamys hirasei</i>         | correct | correct | correct | correct | correct | correct |                              |
| <i>Volachlamys hirasei</i>          | GU120005 | <i>Volachlamys hirasei</i>         | correct | correct | correct | correct | correct | correct |                              |
| <i>Volachlamys hirasei</i>          | GU120006 | <i>Volachlamys hirasei</i>         | correct | correct | correct | correct | correct | correct |                              |
| <i>Volachlamys hirasei</i>          | GU120007 | <i>Volachlamys hirasei</i>         | correct | correct | correct | correct | correct | correct |                              |
| <i>Volachlamys hirasei</i>          | GU120008 | <i>Volachlamys hirasei</i>         | no id   | no id   | correct | no id   | no id   | correct |                              |
| <i>Volachlamys hirasei</i>          | GU120009 | <i>Volachlamys hirasei</i>         | no id   | no id   | correct | no id   | no id   | correct |                              |
| <i>Volachlamys hirasei</i>          | GU120010 | <i>Volachlamys hirasei</i>         | correct | correct | correct | correct | correct | correct |                              |
| <i>Volutharpa ampullacea perryi</i> | JN053003 | <i>Volutharpa ampullaceaperryi</i> | correct | correct | correct | correct | correct | correct | <i>Buccinum senshumaruae</i> |
| <i>Volutharpa ampullacea perryi</i> | JN053004 | <i>Volutharpa ampullaceaperryi</i> | correct | correct | correct | correct | correct | correct | <i>Buccinum senshumaruae</i> |
| <i>Volutharpa ampullacea perryi</i> | HQ834060 | <i>Volutharpa ampullaceaperryi</i> | correct | correct | correct | correct | correct | correct | <i>Buccinum senshumaruae</i> |
| <i>Volutharpa ampullacea perryi</i> | JN053002 | <i>Volutharpa ampullaceaperryi</i> | correct | correct | correct | correct | correct | correct | <i>Buccinum senshumaruae</i> |
| <i>Xenostrobos atrata</i>           | GQ480323 | <i>Xenostrobos atrata</i>          | correct | correct | correct | correct | correct | correct | <i>Xenostrobos atratus</i>   |
| <i>Xenostrobos atrata</i>           | GQ480324 | <i>Xenostrobos atrata</i>          | correct | correct | correct | correct | correct | correct | <i>Xenostrobos atratus</i>   |
| <i>Xenostrobos atrata</i>           | GQ480325 | <i>Xenostrobos atrata</i>          | correct | correct | correct | correct | correct | correct | <i>Xenostrobos atratus</i>   |
| <i>Xenostrobos atrata</i>           | GQ480326 | <i>Xenostrobos atrata</i>          | no id   | correct | correct | no id   | correct | correct | <i>Xenostrobos atratus</i>   |
| <i>Xenostrobos atrata</i>           | GQ480327 | <i>Xenostrobos atrata</i>          | correct | correct | correct | correct | correct | correct | <i>Xenostrobos atratus</i>   |

**Supplementary Table 4.** BINs with concordant taxonomy.

| Process ID   | Identification        | Rank of Conflict | BIN          | BIN Total Members |
|--------------|-----------------------|------------------|--------------|-------------------|
| SSEO036-15   | Bonartemis histrio    | Genus            | BOLD:AAO9165 | 4                 |
| SSEO037-15   | Bonartemis histrio    |                  |              |                   |
| SSEO383-16   | Adipicola crypta      | Species          | BOLD:AAD3750 | 3                 |
| SSEO387-16   | Adipicola pacifica    | Species          | BOLD:ACH5470 | 4                 |
| SSEO386-16   | Adipicola pacifica    |                  |              |                   |
| SSEO384-16   | Adipicola pacifica    |                  |              |                   |
| SSEO388-16   | Adipicola pacifica    |                  |              |                   |
| SSEO366-16   | Adipicola pacifica    |                  |              |                   |
| SSEO385-16   | Adipicola pacifica    |                  |              |                   |
| SSEO778-16   | Alcyna ocellata       | Species          | BOLD:ACB8409 | 4                 |
| SSEO777-16   | Alcyna ocellata       |                  |              |                   |
| QWEAS1346-15 | Amphioctopus aegina   | Species          | BOLD:AAM5036 | 29                |
| QWEAS192-15  | Amphioctopus aegina   |                  |              |                   |
| QWEAS191-15  | Amphioctopus aegina   |                  |              |                   |
| QWEAS187-15  | Amphioctopus aegina   |                  |              |                   |
| QWEAS188-15  | Amphioctopus aegina   |                  |              |                   |
| QWEAS190-15  | Amphioctopus aegina   |                  |              |                   |
| QWEAS189-15  | Amphioctopus aegina   |                  |              |                   |
| SSEO265-16   | Amphioctopus fangsiao | Species          | BOLD:AAE5989 | 22                |
| QWEAS195-15  | Amphioctopus fangsiao |                  |              |                   |
| QWEAS193-15  | Amphioctopus fangsiao |                  |              |                   |

|              |                                       |         |              |    |
|--------------|---------------------------------------|---------|--------------|----|
| QWEAS194-15  | <i>Amphioctopus fangsiao</i>          |         |              |    |
| QWEAS197-15  | <i>Amphioctopus fangsiao</i>          |         |              |    |
| SSEO264-16   | <i>Amphioctopus fangsiao</i>          | Species | BOLD:ABX6367 | 3  |
| SSEO1314-16  | <i>Angaria formosa</i>                | Species | BOLD:AAJ2656 | 4  |
| SSEO1315-16  | <i>Angaria formosa</i>                |         |              |    |
| QWEAS938-15  | <i>Anomalocardia producta</i>         | Species | BOLD:AAO8010 | 17 |
| QWEAS939-15  | <i>Anomalocardia producta</i>         |         |              |    |
| QWEAS936-15  | <i>Anomalocardia producta</i>         |         |              |    |
| QWEAS935-15  | <i>Anomalocardia producta</i>         |         |              |    |
| QWEAS937-15  | <i>Anomalocardia producta</i>         |         |              |    |
| QWEAS1488-15 | <i>Anomalodiscus squamosus</i>        | Species | BOLD:AAO8009 | 14 |
| QWEAS926-15  | <i>Anomalodiscus squamosus</i>        |         |              |    |
| QWEAS924-15  | <i>Anomalodiscus squamosus</i>        |         |              |    |
| QWEAS925-15  | <i>Anomalodiscus squamosus</i>        |         |              |    |
| QWEAS923-15  | <i>Anomalodiscus squamosus</i>        |         |              |    |
| SSEO390-16   | <i>Anteaeolidiella takanosimensis</i> | Species | BOLD:ACI1278 | 4  |
| SSEO389-16   | <i>Anteaeolidiella takanosimensis</i> |         |              |    |
| QWEAS1489-15 | <i>Antigona lamellaris</i>            | Species | BOLD:AAJ2504 | 25 |
| QWEAS1212-15 | <i>Antigona lamellaris</i>            |         |              |    |
| QWEAS1215-15 | <i>Antigona lamellaris</i>            |         |              |    |
| QWEAS1213-15 | <i>Antigona lamellaris</i>            |         |              |    |
| QWEAS1211-15 | <i>Antigona lamellaris</i>            |         |              |    |
| QWEAS1209-15 | <i>Antigona lamellaris</i>            |         |              |    |
| QWEAS1214-15 | <i>Antigona lamellaris</i>            |         |              |    |
| QWEAS1216-15 | <i>Antigona lamellaris</i>            |         |              |    |
| QWEAS1210-15 | <i>Antigona lamellaris</i>            |         |              |    |

|              |                                |         |              |    |
|--------------|--------------------------------|---------|--------------|----|
| SSEO065-16   | <i>Aplysia kurodai</i>         | Species | BOLD:AAJ8409 | 6  |
| SSEO066-16   | <i>Aplysia kurodai</i>         |         |              |    |
| SSEO760-16   | <i>Atrina pectinata</i>        | Species | BOLD:AAD9828 | 90 |
| SSEO757-16   | <i>Atrina pectinata</i>        |         |              |    |
| SSEO759-16   | <i>Atrina pectinata</i>        |         |              |    |
| SSEO758-16   | <i>Atrina pectinata</i>        | Species | BOLD:AAD9827 | 17 |
| SSEO756-16   | <i>Atrina pectinata</i>        |         |              |    |
| QWEAS318-15  | <i>Babylonia areolata</i>      | Species | BOLD:AAB7071 | 23 |
| QWEAS319-15  | <i>Babylonia areolata</i>      |         |              |    |
| QWEAS320-15  | <i>Babylonia areolata</i>      |         |              |    |
| QWEAS317-15  | <i>Babylonia areolata</i>      |         |              |    |
| SSEO751-16   | <i>Barbatia fusca</i>          | Species | BOLD:AAW3133 | 2  |
| SSEO753-16   | <i>Barbatia lacerata</i>       | Species | BOLD:AAW3137 | 2  |
| SSEO752-16   | <i>Barbatia lima</i>           | Species | BOLD:AAW3139 | 2  |
| QWEAS1538-15 | <i>Barnea davidi</i>           | Species | BOLD:ACQ7230 | 2  |
| QWEAS1540-15 | <i>Barnea dilatata</i>         | Species | BOLD:ACQ0719 | 4  |
| QWEAS1539-15 | <i>Barnea dilatata</i>         |         |              |    |
| SSEO421-16   | <i>Bathymodiolus aduloides</i> | Species | BOLD:ACB6944 | 4  |
| SSEO419-16   | <i>Bathymodiolus aduloides</i> |         |              |    |
| SSEO396-16   | <i>Bathymodiolus aduloides</i> |         |              |    |
| SSEO418-16   | <i>Bathymodiolus aduloides</i> |         |              |    |
| SSEO420-16   | <i>Bathymodiolus aduloides</i> |         |              |    |
| SSEO395-16   | <i>Bathymodiolus aduloides</i> |         |              |    |
| SSEO416-16   | <i>Bathymodiolus aduloides</i> |         |              |    |
| SSEO417-16   | <i>Bathymodiolus aduloides</i> |         |              |    |
| SSEO429-16   | <i>Bathymodiolus hirtus</i>    | Species | BOLD:AAW2782 | 2  |



|             |                             |         |              |    |
|-------------|-----------------------------|---------|--------------|----|
| SSEO430-16  | Bathymodiolus hirtus        |         |              |    |
| SSEO426-16  | Bathymodiolus japonicus     |         |              |    |
| SSEO427-16  | Bathymodiolus japonicus     | Species | BOLD:ACQ4898 | 2  |
| SSEO428-16  | Bathymodiolus japonicus     |         |              |    |
| SSEO412-16  | Bathymodiolus platifrons    |         |              |    |
| SSEO432-16  | Bathymodiolus platifrons    | Species | BOLD:AAW2781 | 5  |
| SSEO415-16  | Bathymodiolus platifrons    |         |              |    |
| SSEO436-16  | Bathymodiolus securiformis  |         |              |    |
| SSEO443-16  | Bathymodiolus securiformis  | Species | BOLD:ACQ4440 | 1  |
| SSEO1153-16 | Batillaria cumingii         |         |              |    |
| QWEAS475-15 | Batillaria cumingii         | Species | BOLD:ACY9200 | 11 |
| QWEAS474-15 | Batillaria cumingii         |         |              |    |
| QWEAS476-15 | Batillaria cumingii         |         |              |    |
| QWEAS480-15 | Batillaria zonalis          |         |              |    |
| QWEAS481-15 | Batillaria zonalis          | Species | BOLD:AAA7589 | 8  |
| SSEO355-16  | Benthomodiolus geikotsucola |         |              |    |
| SSEO350-16  | Benthomodiolus geikotsucola | Species | BOLD:ACH5802 | 4  |
| SSEO321-16  | Berryteuthis anonychus      |         |              |    |
| SSEO322-16  | Berryteuthis magister       | Species | BOLD:AAD8239 | 7  |
| QWEAS281-15 | Boreotrophon xestra         |         |              |    |
| QWEAS284-15 | Boreotrophon xestra         | Species | BOLD:ACX4004 | 4  |
| QWEAS282-15 | Boreotrophon xestra         |         |              |    |
| QWEAS283-15 | Boreotrophon xestra         |         |              |    |
| QWEAS056-15 | Brachidontes mutabilis      |         |              |    |
| QWEAS059-15 | Brachidontes mutabilis      | Species | BOLD:ACQ6976 | 8  |
| QWEAS057-15 | Brachidontes mutabilis      |         |              |    |

|             |                              |         |              |    |
|-------------|------------------------------|---------|--------------|----|
| QWEAS058-15 | Brachidontes mutabilis       |         |              |    |
| SSEO776-16  | Broderipia iridescens        | Species | BOLD:AAW6962 | 4  |
| SSEO775-16  | Broderipia iridescens        |         |              |    |
| SSEO007-15  | Volutharpa ampullacea perryi | Species | BOLD:ACX3628 | 8  |
| SSEO005-15  | Volutharpa ampullacea perryi |         |              |    |
| SSEO004-15  | Volutharpa ampullacea perryi |         |              |    |
| SSEO006-15  | Volutharpa ampullacea perryi |         |              |    |
| QWEAS237-15 | Buccinum yokomaruae          | Species | BOLD:ACX3481 | 4  |
| QWEAS235-15 | Buccinum yokomaruae          |         |              |    |
| QWEAS236-15 | Buccinum yokomaruae          |         |              |    |
| QWEAS238-15 | Buccinum yokomaruae          |         |              |    |
| QWEAS538-15 | Bursa granularis             | Species | BOLD:ACB7446 | 10 |
| QWEAS540-15 | Bursa granularis             |         |              |    |
| QWEAS542-15 | Bursa granularis             |         |              |    |
| QWEAS541-15 | Bursa granularis             |         |              |    |
| QWEAS539-15 | Bursa granularis             |         |              |    |
| QWEAS560-15 | Bursa rana                   | Species | BOLD:ACB8165 | 10 |
| QWEAS564-15 | Bursa rana                   |         |              |    |
| QWEAS561-15 | Bursa rana                   |         |              |    |
| QWEAS562-15 | Bursa rana                   |         |              |    |
| QWEAS563-15 | Bursa rana                   |         |              |    |
| SSEO885-16  | Calliostoma akoya            |         |              |    |
| SSEO883-16  | Calliostoma haliarchus       | Species | BOLD:ACB7156 | 2  |
| SSEO882-16  | Calliostoma shinagawaensis   | Species | BOLD:ACB7821 | 2  |
| QWEAS913-15 | Callista brevisiphonata      | Species | BOLD:AAO9337 | 16 |
| QWEAS915-15 | Callista brevisiphonata      |         |              |    |

|              |                            |         |              |    |
|--------------|----------------------------|---------|--------------|----|
| QWEAS1472-15 | Callista brevisiphonata    |         |              |    |
| QWEAS914-15  | Callista brevisiphonata    |         |              |    |
| QWEAS912-15  | Callista brevisiphonata    |         |              |    |
| QWEAS1471-15 | Callista brevisiphonata    |         |              |    |
| QWEAS910-15  | Callista chione            | Species | BOLD:AAO9335 | 3  |
| QWEAS911-15  | Callista chione            | Species | BOLD:AAO9336 | 3  |
| SSEO239-16   | Callistoctopus luteus      | Species | BOLD:AAF5624 | 4  |
| SSEO241-16   | Callistoctopus luteus      |         |              |    |
| SSEO681-16   | Calyptogena phaseoliformis | Species | BOLD:ACY9773 | 2  |
| SSEO771-16   | Cantharidus callichroa     | Species | BOLD:AAF7715 | 4  |
| SSEO769-16   | Cantharidus callichroa     |         |              |    |
| SSEO770-16   | Cantharidus callichroa     | Species | BOLD:AAF7716 | 2  |
| SSEO773-16   | Cantharidus infuscatus     | Species | BOLD:ACB8343 | 2  |
| QWEAS243-15  | Cantharus melanostomus     | Species | BOLD:ACX3925 | 2  |
| QWEAS244-15  | Cantharus melanostomus     |         |              |    |
| QWEAS245-15  | Cantharus cecillei         | Species | BOLD:ACX3567 | 2  |
| QWEAS246-15  | Cantharus cecillei         |         |              |    |
| QWEAS1474-15 | Cellana grata              |         |              |    |
| QWEAS1323-15 | Cellana grata              |         |              |    |
| QWEAS1473-15 | Cellana grata              |         |              |    |
| QWEAS1326-15 | Cellana grata              | Species | BOLD:ACQ5849 | 24 |
| QWEAS1327-15 | Cellana grata              |         |              |    |
| QWEAS1322-15 | Cellana grata              |         |              |    |
| QWEAS1324-15 | Cellana grata              |         |              |    |
| QWEAS1325-15 | Cellana grata              |         |              |    |
| SSEO998-16   | Cellana mazatlandica       | Species | BOLD:AAD2518 | 26 |

|            |                      |         |              |    |
|------------|----------------------|---------|--------------|----|
| SSEO994-16 | Cellana mazatlandica |         |              |    |
| SSEO979-16 | Cellana mazatlandica |         |              |    |
| SSEO997-16 | Cellana mazatlandica |         |              |    |
| SSEO996-16 | Cellana mazatlandica |         |              |    |
| SSEO960-16 | Cellana mazatlandica |         |              |    |
| SSEO964-16 | Cellana mazatlandica |         |              |    |
| SSEO995-16 | Cellana mazatlandica |         |              |    |
| SSEO962-16 | Cellana mazatlandica |         |              |    |
| SSEO993-16 | Cellana mazatlandica |         |              |    |
| SSEO963-16 | Cellana mazatlandica |         |              |    |
| SSEO961-16 | Cellana mazatlandica |         |              |    |
| SSEO958-16 | Cellana mazatlandica |         |              |    |
| SSEO926-16 | Cellana nigrolineata |         |              |    |
| SSEO927-16 | Cellana nigrolineata |         |              |    |
| SSEO953-16 | Cellana nigrolineata |         |              |    |
| SSEO934-16 | Cellana nigrolineata |         |              |    |
| SSEO957-16 | Cellana nigrolineata |         |              |    |
| SSEO946-16 | Cellana nigrolineata |         |              |    |
| SSEO936-16 | Cellana nigrolineata | Species | BOLD:ACQ2208 | 68 |
| SSEO933-16 | Cellana nigrolineata |         |              |    |
| SSEO916-16 | Cellana nigrolineata |         |              |    |
| SSEO929-16 | Cellana nigrolineata |         |              |    |
| SSEO940-16 | Cellana nigrolineata |         |              |    |
| SSEO945-16 | Cellana nigrolineata |         |              |    |
| SSEO941-16 | Cellana nigrolineata |         |              |    |
| SSEO955-16 | Cellana nigrolineata |         |              |    |

|             |                      |         |              |    |
|-------------|----------------------|---------|--------------|----|
| SSE0923-16  | Cellana nigrolineata |         |              |    |
| SSE0948-16  | Cellana nigrolineata |         |              |    |
| SSE0924-16  | Cellana nigrolineata |         |              |    |
| SSE0939-16  | Cellana nigrolineata |         |              |    |
| SSE0935-16  | Cellana nigrolineata |         |              |    |
| SSE0931-16  | Cellana nigrolineata |         |              |    |
| SSE0922-16  | Cellana nigrolineata |         |              |    |
| SSE0930-16  | Cellana nigrolineata |         |              |    |
| SSE0938-16  | Cellana nigrolineata |         |              |    |
| SSE0932-16  | Cellana nigrolineata |         |              |    |
| SSE0952-16  | Cellana nigrolineata |         |              |    |
| SSE0942-16  | Cellana nigrolineata |         |              |    |
| SSE0925-16  | Cellana nigrolineata |         |              |    |
| SSE0956-16  | Cellana nigrolineata |         |              |    |
| SSE0920-16  | Cellana nigrolineata |         |              |    |
| SSE0928-16  | Cellana nigrolineata |         |              |    |
| SSE0947-16  | Cellana nigrolineata |         |              |    |
| SSE0921-16  | Cellana nigrolineata |         |              |    |
| SSE0954-16  | Cellana nigrolineata |         |              |    |
| SSE0937-16  | Cellana nigrolineata |         |              |    |
| SSE0970-16  | Cellana nigrolineata | Species | BOLD:AAI7331 | 55 |
| SSE0971-16  | Cellana nigrolineata |         |              |    |
| SSE0975-16  | Cellana nigrolineata |         |              |    |
| SSE0968-16  | Cellana nigrolineata |         |              |    |
| SSE0951-16  | Cellana nigrolineata |         |              |    |
| SSE01372-16 | Cellana nigrolineata |         |              |    |

|             |                      |         |              |    |
|-------------|----------------------|---------|--------------|----|
| SSE0972-16  | Cellana nigrolineata |         |              |    |
| SSE0913-16  | Cellana nigrolineata |         |              |    |
| SSE0917-16  | Cellana nigrolineata |         |              |    |
| SSE0943-16  | Cellana nigrolineata |         |              |    |
| SSE0974-16  | Cellana nigrolineata |         |              |    |
| SSE0978-16  | Cellana nigrolineata |         |              |    |
| SSE0944-16  | Cellana nigrolineata |         |              |    |
| SSE0976-16  | Cellana nigrolineata |         |              |    |
| SSE0919-16  | Cellana nigrolineata |         |              |    |
| SSE0914-16  | Cellana nigrolineata |         |              |    |
| SSE01371-16 | Cellana nigrolineata |         |              |    |
| SSE0969-16  | Cellana nigrolineata |         |              |    |
| SSE0950-16  | Cellana nigrolineata |         |              |    |
| SSE0949-16  | Cellana nigrolineata |         |              |    |
| SSE0967-16  | Cellana nigrolineata |         |              |    |
| SSE0918-16  | Cellana nigrolineata |         |              |    |
| SSE0966-16  | Cellana nigrolineata |         |              |    |
| SSE0965-16  | Cellana nigrolineata |         |              |    |
| SSE0912-16  | Cellana nigrolineata |         |              |    |
| SSE0977-16  | Cellana nigrolineata |         |              |    |
| SSE0973-16  | Cellana nigrolineata |         |              |    |
| SSE0988-16  | Cellana testudinaria | Species | BOLD:AAW6217 | 2  |
| SSE01401-16 | Ceratostoma roriflum |         |              |    |
| SSE01378-16 | Ceratostoma roriflum | Species | BOLD:ACB8155 | 21 |
| QWEAS388-15 | Ceratostoma roriflum |         |              |    |
| QWEAS389-15 | Ceratostoma roriflum |         |              |    |

|             |                               |         |              |    |
|-------------|-------------------------------|---------|--------------|----|
| QWEAS387-15 | <i>Ceratostoma rorifluum</i>  |         |              |    |
| QWEAS384-15 | <i>Ceratostoma rorifluum</i>  |         |              |    |
| QWEAS385-15 | <i>Ceratostoma rorifluum</i>  |         |              |    |
| QWEAS386-15 | <i>Ceratostoma rorifluum</i>  |         |              |    |
| SSEO1195-16 | <i>Cerithidea ornate</i>      |         |              |    |
| SSEO1191-16 | <i>Cerithidea ornate</i>      |         |              |    |
| SSEO1193-16 | <i>Cerithidea ornate</i>      | Species | BOLD:AAD8882 | 12 |
| SSEO1192-16 | <i>Cerithidea ornate</i>      |         |              |    |
| SSEO1194-16 | <i>Cerithidea ornate</i>      |         |              |    |
| QWEAS490-15 | <i>Cerithium traillii</i>     | Species | BOLD:ACB7348 | 4  |
| QWEAS491-15 | <i>Cerithium traillii</i>     |         |              |    |
| QWEAS377-15 | <i>Chicoreus</i> sp.          |         |              |    |
| QWEAS375-15 | <i>Chicoreus</i> sp.          |         |              |    |
| QWEAS376-15 | <i>Chicoreus</i> sp.          | Species | BOLD:ACH7451 | 14 |
| QWEAS379-15 | <i>Chicoreus</i> sp.          |         |              |    |
| QWEAS374-15 | <i>Chicoreus</i> sp.          |         |              |    |
| QWEAS378-15 | <i>Chicoreus</i> sp.          |         |              |    |
| SSEO841-16  | <i>Chlorostoma lischkei</i>   | Species | BOLD:AAJ0065 | 5  |
| SSEO1368-16 | <i>Chlorostoma lischkei</i>   |         |              |    |
| SSEO1415-16 | <i>Chlorostoma turbinatum</i> | Species | BOLD:ACB8508 | 2  |
| QWEAS988-15 | <i>Circe scripta</i>          |         |              |    |
| QWEAS984-15 | <i>Circe scripta</i>          |         |              |    |
| QWEAS986-15 | <i>Circe scripta</i>          | Species | BOLD:AAO5746 | 18 |
| QWEAS985-15 | <i>Circe scripta</i>          |         |              |    |
| QWEAS987-15 | <i>Circe scripta</i>          |         |              |    |
| QWEAS989-15 | <i>Circe scripta</i>          |         |              |    |

|              |                                   |         |              |     |
|--------------|-----------------------------------|---------|--------------|-----|
| QWEAS983-15  | <i>Circe scripta</i>              | Species | BOLD:AAO5747 | 7   |
| QWEAS982-15  | <i>Circe scripta</i>              |         |              |     |
| SSEO768-16   | <i>Clanculus bronni</i>           | Species | BOLD:ACB7592 | 2   |
| SSEO767-16   | <i>Clanculus margaritarius</i>    | Species | BOLD:ACB7049 | 2   |
| SSEO810-16   | <i>Clanculus microdon</i>         | Species | BOLD:ACB7593 | 2   |
| QWEAS631-15  | <i>Clinocardium californiense</i> | Species | BOLD:ACQ0592 | 12  |
| QWEAS632-15  | <i>Clinocardium californiense</i> |         |              |     |
| QWEAS636-15  | <i>Clinocardium californiense</i> |         |              |     |
| QWEAS635-15  | <i>Clinocardium californiense</i> |         |              |     |
| QWEAS633-15  | <i>Clinocardium californiense</i> |         |              |     |
| QWEAS634-15  | <i>Clinocardium californiense</i> |         |              |     |
| SSEO071-16   | <i>Coccolpigya punctoradiata</i>  | Species | BOLD:AAJ0679 | 4   |
| SSEO070-16   | <i>Coccolpigya punctoradiata</i>  |         |              |     |
| QWEAS1284-15 | <i>Coelomactra antiquata</i>      | Species | BOLD:ACH4893 | 16  |
| QWEAS1285-15 | <i>Coelomactra antiquata</i>      |         |              |     |
| QWEAS1286-15 | <i>Coelomactra antiquata</i>      | Species | BOLD:ACH4894 | 16  |
| SSEO1317-16  | <i>Collonista amakusaensis</i>    | Species | BOLD:AAR9984 | 2   |
| SSEO1318-16  | <i>Collonista costulosa</i>       | Species | BOLD:AAR9985 | 2   |
| SSEO809-16   | <i>Conotalopia mustelina</i>      | Species | BOLD:ACB8111 | 2   |
| SSEO808-16   | <i>Conotalopia ornata</i>         | Species | BOLD:ACB8718 | 2   |
| QWEAS323-15  | <i>Conus betulinus</i>            | Species | BOLD:ACH7650 | 4   |
| QWEAS324-15  | <i>Conus betulinus</i>            |         |              |     |
| SSEO1063-16  | <i>Conus ebraeus</i>              | Species | BOLD:AAA4120 | 176 |
| SSEO1072-16  | <i>Conus ebraeus</i>              |         |              |     |
| SSEO1066-16  | <i>Conus ebraeus</i>              |         |              |     |
| SSEO1103-16  | <i>Conus ebraeus</i>              |         |              |     |



|             |                      |         |              |    |
|-------------|----------------------|---------|--------------|----|
| SSEO1070-16 | Conus ebraeus        |         |              |    |
| SSEO1068-16 | Conus ebraeus        |         |              |    |
| SSEO1069-16 | Conus ebraeus        |         |              |    |
| SSEO1065-16 | Conus ebraeus        |         |              |    |
| SSEO1102-16 | Conus ebraeus        |         |              |    |
| SSEO1067-16 | Conus ebraeus        |         |              |    |
| SSEO1062-16 | Conus ebraeus        |         |              |    |
| SSEO1104-16 | Conus ebraeus        |         |              |    |
| SSEO1073-16 | Conus ebraeus        |         |              |    |
| SSEO1081-16 | Conus ebraeus        |         |              |    |
| SSEO1064-16 | Conus ebraeus        |         |              |    |
| SSEO1188-16 | Conus ebraeus        |         |              |    |
| SSEO1074-16 | Conus ebraeus        |         |              |    |
| SSEO1071-16 | Conus ebraeus        |         |              |    |
| SSEO1075-16 | Conus judaeus        | Species | BOLD:AAS0164 | 6  |
| QWEAS325-15 | Conus quercinus      | Species | BOLD:AAO6779 | 7  |
| QWEAS322-15 | Conus textile        | Species | BOLD:ACX4065 | 2  |
| SSEO658-16  | Corbicula sandai     |         |              |    |
| SSEO684-16  | Corbicula sandai     |         |              |    |
| SSEO683-16  | Corbicula sandai     | Species | BOLD:ABZ7626 | 19 |
| SSEO659-16  | Corbicula sandai     |         |              |    |
| SSEO685-16  | Corbicula sandai     |         |              |    |
| SSEO660-16  | Corbicula sandai     |         |              |    |
| QWEAS091-15 | Corbula erythrodon   | Species | BOLD:ACH5926 | 3  |
| SSEO690-16  | Crassostrea angulata |         |              |    |
| SSEO687-16  | Crassostrea angulata | Species | BOLD:ACH3409 | 48 |

|              |                            |         |              |     |
|--------------|----------------------------|---------|--------------|-----|
| SSEO700-16   | Crassostrea angulata       |         |              |     |
| SSEO699-16   | Crassostrea angulata       |         |              |     |
| SSEO689-16   | Crassostrea angulata       |         |              |     |
| SSEO713-16   | Crassostrea angulata       |         |              |     |
| SSEO701-16   | Crassostrea angulata       |         |              |     |
| SSEO715-16   | Crassostrea angulata       |         |              |     |
| SSEO688-16   | Crassostrea angulata       |         |              |     |
| SSEO714-16   | Crassostrea angulata       |         |              |     |
| QWEAS1530-15 | Crassostrea angulata       |         |              |     |
| QWEAS008-15  | Crassostrea angulata       |         |              |     |
| QWEAS007-15  | Crassostrea angulata       |         |              |     |
| SSEO392-16   | Cryptobranchia kuragiensis | Species | BOLD:AAR4677 | 4   |
| SSEO391-16   | Cryptobranchia kuragiensis |         |              |     |
| QWEAS610-15  | Cultellus attenuatus       |         |              |     |
| QWEAS609-15  | Cultellus attenuatus       | Species | BOLD:ACQ3574 | 8   |
| QWEAS607-15  | Cultellus attenuatus       |         |              |     |
| QWEAS608-15  | Cultellus attenuatus       |         |              |     |
| SSEO473-16   | Cyclina sinensis           |         |              |     |
| SSEO478-16   | Cyclina sinensis           |         |              |     |
| SSEO472-16   | Cyclina sinensis           |         |              |     |
| QWEAS997-15  | Cyclina sinensis           |         |              |     |
| QWEAS1003-15 | Cyclina sinensis           | Species | BOLD:AAE2934 | 116 |
| QWEAS994-15  | Cyclina sinensis           |         |              |     |
| QWEAS998-15  | Cyclina sinensis           |         |              |     |
| QWEAS990-15  | Cyclina sinensis           |         |              |     |
| QWEAS1001-15 | Cyclina sinensis           |         |              |     |

|              |                              |         |              |    |
|--------------|------------------------------|---------|--------------|----|
| QWEAS993-15  | <i>Cyclina sinensis</i>      |         |              |    |
| QWEAS1005-15 | <i>Cyclina sinensis</i>      |         |              |    |
| QWEAS996-15  | <i>Cyclina sinensis</i>      |         |              |    |
| QWEAS991-15  | <i>Cyclina sinensis</i>      |         |              |    |
| QWEAS992-15  | <i>Cyclina sinensis</i>      |         |              |    |
| QWEAS1004-15 | <i>Cyclina sinensis</i>      |         |              |    |
| QWEAS1000-15 | <i>Cyclina sinensis</i>      |         |              |    |
| QWEAS1002-15 | <i>Cyclina sinensis</i>      |         |              |    |
| QWEAS1006-15 | <i>Cyclina sinensis</i>      |         |              |    |
| QWEAS995-15  | <i>Cyclina sinensis</i>      |         |              |    |
| QWEAS999-15  | <i>Cyclina sinensis</i>      |         |              |    |
| QWEAS493-15  | <i>Cymatium cingulatum</i>   | Species | BOLD:ACB8396 | 4  |
| QWEAS492-15  | <i>Cymatium cingulatum</i>   |         |              |    |
| SSEO871-16   | <i>Dillwynella vitrea</i>    | Species | BOLD:AAI9907 | 5  |
| SSEO872-16   | <i>Dillwynella vitrea</i>    |         |              |    |
| SSEO807-16   | <i>Diloma piperinus</i>      | Species | BOLD:ACB8024 | 2  |
| SSEO805-16   | <i>Diloma radula</i>         | Species | BOLD:AAX9594 | 3  |
| SSEO806-16   | <i>Diloma suavis</i>         | Species | BOLD:ACB8023 | 2  |
| QWEAS544-15  | <i>Distorsio reticularis</i> | Species | BOLD:ACX3726 | 2  |
| QWEAS543-15  | <i>Distorsio reticularis</i> | Species | BOLD:ACB8328 | 2  |
| QWEAS589-15  | <i>Donax dysoni</i>          |         |              |    |
| QWEAS592-15  | <i>Donax dysoni</i>          |         |              |    |
| QWEAS591-15  | <i>Donax dysoni</i>          | Species | BOLD:ACQ5978 | 13 |
| QWEAS588-15  | <i>Donax dysoni</i>          |         |              |    |
| QWEAS590-15  | <i>Donax dysoni</i>          |         |              |    |
| QWEAS593-15  | <i>Donax dysoni</i>          |         |              |    |

|              |                              |         |              |    |
|--------------|------------------------------|---------|--------------|----|
| QWEAS1014-15 | Dosinia troscheli            | Species | BOLD:AAO9164 | 7  |
| QWEAS1015-15 | Dosinia troscheli            |         |              |    |
| SSEO1099-16  | Drupa grossularia            | Species | BOLD:ACB7326 | 6  |
| SSEO1095-16  | Drupa rubusidaeus            | Species | BOLD:ACB7008 | 9  |
| SSEO1096-16  | Drupa rubusidaeus            |         |              |    |
| SSEO1110-16  | Drupella cornus              | Species | BOLD:ACB7782 | 12 |
| SSEO1094-16  | Drupella eburnea             | Species | BOLD:ACB8027 | 2  |
| SSEO1109-16  | Drupella rugosa              | Species | BOLD:ACB8666 | 22 |
| SSEO1108-16  | Drupella rugosa              |         |              |    |
| QWEAS1518-15 | Drupella rugosa              |         |              |    |
| QWEAS1512-15 | Drupella rugosa              |         |              |    |
| QWEAS1519-15 | Drupella rugosa              |         |              |    |
| QWEAS1515-15 | Drupella rugosa              |         |              |    |
| QWEAS1513-15 | Drupella rugosa              |         |              |    |
| QWEAS1516-15 | Drupella rugosa              |         |              |    |
| QWEAS1514-15 | Drupella rugosa              |         |              |    |
| QWEAS1511-15 | Drupella rugosa              |         |              |    |
| QWEAS1517-15 | Drupella rugosa              |         |              |    |
| QWEAS1337-15 | Duplicaria sp.               | Species | BOLD:ACX8893 | 2  |
| SSEO1011-16  | Echinolittorina cinerea      | Species | BOLD:AAI8981 | 3  |
| SSEO1010-16  | Echinolittorina radiata      | Species | BOLD:AAF6108 | 41 |
| QWEAS559-15  | Echinolittorina radiata      |         |              |    |
| QWEAS558-15  | Echinolittorina radiata      |         |              |    |
| SSEO1059-16  | Echinolittorina trochoides E | Species | BOLD:AAB5305 | 42 |
| SSEO1037-16  | Echinolittorina trochoides E |         |              |    |
| SSEO1036-16  | Echinolittorina trochoides E |         |              |    |

|             |                              |         |              |    |
|-------------|------------------------------|---------|--------------|----|
| SSEO1032-16 | Echinolittorina trochoides E |         |              |    |
| SSEO1030-16 | Echinolittorina trochoides E |         |              |    |
| SSEO1060-16 | Echinolittorina trochoides E |         |              |    |
| SSEO1019-16 | Echinolittorina trochoides E |         |              |    |
| SSEO1022-16 | Echinolittorina trochoides E |         |              |    |
| SSEO1026-16 | Echinolittorina trochoides E |         |              |    |
| SSEO1020-16 | Echinolittorina trochoides E |         |              |    |
| SSEO1034-16 | Echinolittorina trochoides E |         |              |    |
| SSEO1033-16 | Echinolittorina trochoides E |         |              |    |
| SSEO1024-16 | Echinolittorina trochoides E |         |              |    |
| SSEO1035-16 | Echinolittorina trochoides E |         |              |    |
| SSEO1025-16 | Echinolittorina trochoides E |         |              |    |
| SSEO1029-16 | Echinolittorina trochoides E |         |              |    |
| SSEO1021-16 | Echinolittorina trochoides E |         |              |    |
| SSEO1031-16 | Echinolittorina trochoides E |         |              |    |
| SSEO1028-16 | Echinolittorina trochoides E |         |              |    |
| SSEO1023-16 | Echinolittorina trochoides E |         |              |    |
| SSEO1027-16 | Echinolittorina trochoides E |         |              |    |
| SSEO1050-16 | Echinolittorina vidua        | Species | BOLD:ABY6936 | 31 |
| SSEO1052-16 | Echinolittorina vidua        |         |              |    |
| SSEO1056-16 | Echinolittorina vidua        |         |              |    |
| SSEO1055-16 | Echinolittorina vidua        |         |              |    |
| SSEO1054-16 | Echinolittorina vidua        |         |              |    |
| SSEO1057-16 | Echinolittorina vidua        |         |              |    |
| SSEO1051-16 | Echinolittorina vidua        |         |              |    |
| SSEO1058-16 | Echinolittorina vidua        |         |              |    |

|             |                             |         |              |    |
|-------------|-----------------------------|---------|--------------|----|
| SSEO177-16  | <i>Elysia pusilla</i>       |         |              |    |
| SSEO175-16  | <i>Elysia pusilla</i>       | Species | BOLD:ACI0336 | 12 |
| SSEO176-16  | <i>Elysia pusilla</i>       |         |              |    |
| SSEO179-16  | <i>Elysia rufescens</i>     | Species | BOLD:ACH5921 | 7  |
| SSEO178-16  | <i>Elysia rufescens</i>     |         |              |    |
| SSEO173-16  | <i>Elysia trisinuata</i>    | Species | BOLD:ACI0714 | 2  |
| SSEO447-16  | <i>Emarginula foveolata</i> | Species | BOLD:AAI9219 | 4  |
| SSEO448-16  | <i>Emarginula foveolata</i> |         |              |    |
| SSEO445-16  | <i>Emarginula variegata</i> | Species | BOLD:AAI9222 | 4  |
| SSEO446-16  | <i>Emarginula variegata</i> |         |              |    |
| SSEO804-16  | <i>Ethaliella floccata</i>  | Species | BOLD:ACY9621 | 4  |
| SSEO803-16  | <i>Ethaliella floccata</i>  |         |              |    |
| SSEO802-16  | <i>Ethaliella floccata</i>  | Species | BOLD:AAX7800 | 2  |
| SSEO801-16  | <i>Ethminolia stearnsii</i> | Species | BOLD:ACB8018 | 4  |
| SSEO800-16  | <i>Ethminolia stearnsii</i> |         |              |    |
| QWEAS256-15 | <i>Euplica varians</i>      | Species | BOLD:ACX3948 | 3  |
| QWEAS255-15 | <i>Euplica varians</i>      |         |              |    |
| QWEAS254-15 | <i>Euplica varians</i>      |         |              |    |
| SSEO799-16  | <i>Eurytrochus cognatus</i> | Species | BOLD:AAI4216 | 4  |
| SSEO798-16  | <i>Eurytrochus cognatus</i> |         |              |    |
| QWEAS547-15 | <i>Ficus ficus</i>          | Species | BOLD:ACB8561 | 6  |
| QWEAS545-15 | <i>Ficus ficus</i>          |         |              |    |
| QWEAS546-15 | <i>Ficus ficus</i>          |         |              |    |
| QWEAS552-15 | <i>Ficus gracilis</i>       | Species | BOLD:ACB8357 | 6  |
| QWEAS551-15 | <i>Ficus gracilis</i>       |         |              |    |
| QWEAS553-15 | <i>Ficus gracilis</i>       |         |              |    |

|             |                       |         |              |    |
|-------------|-----------------------|---------|--------------|----|
| QWEAS310-15 | Fusinus longicaudus   | Species | BOLD:ACX3667 | 2  |
| QWEAS311-15 | Fusinus longicaudus   |         |              |    |
| SSEO1321-16 | Gabrielona pisinna    | Species | BOLD:AAI7261 | 4  |
| SSEO1322-16 | Gabrielona pisinna    |         |              |    |
| QWEAS967-15 | Gafrarium dispar      | Species | BOLD:AAO5706 | 20 |
| QWEAS965-15 | Gafrarium dispar      |         |              |    |
| QWEAS966-15 | Gafrarium dispar      |         |              |    |
| QWEAS969-15 | Gafrarium dispar      |         |              |    |
| QWEAS962-15 | Gafrarium dispar      |         |              |    |
| QWEAS968-15 | Gafrarium dispar      |         |              |    |
| QWEAS961-15 | Gafrarium dispar      | Species | BOLD:AAO5707 | 3  |
| QWEAS971-15 | Gafrarium divaricatum | Species | BOLD:AAO5629 | 49 |
| QWEAS978-15 | Gafrarium divaricatum |         |              |    |
| QWEAS979-15 | Gafrarium divaricatum |         |              |    |
| QWEAS976-15 | Gafrarium divaricatum |         |              |    |
| QWEAS972-15 | Gafrarium divaricatum |         |              |    |
| QWEAS970-15 | Gafrarium divaricatum |         |              |    |
| QWEAS974-15 | Gafrarium divaricatum |         |              |    |
| QWEAS981-15 | Gafrarium divaricatum |         |              |    |
| QWEAS975-15 | Gafrarium divaricatum |         |              |    |
| QWEAS980-15 | Gafrarium divaricatum |         |              |    |
| QWEAS977-15 | Gafrarium divaricatum |         |              |    |
| QWEAS973-15 | Gafrarium divaricatum |         |              |    |
| QWEAS954-15 | Gafrarium pectinatum  |         |              |    |
| QWEAS955-15 | Gafrarium pectinatum  |         |              |    |
| QWEAS952-15 | Gafrarium pectinatum  |         |              |    |

|              |                        |         |              |    |
|--------------|------------------------|---------|--------------|----|
| QWEAS953-15  | Gafrarium pectinatum   |         |              |    |
| QWEAS957-15  | Gafrarium tumidum      |         |              |    |
| QWEAS956-15  | Gafrarium tumidum      |         |              |    |
| QWEAS959-15  | Gafrarium tumidum      | Species | BOLD:AAO6039 | 16 |
| QWEAS960-15  | Gafrarium tumidum      |         |              |    |
| QWEAS958-15  | Gafrarium tumidum      |         |              |    |
| SSEO678-16   | Geloina expansa        |         |              |    |
| SSEO433-16   | Gigantidas horikoshii  | Species | BOLD:ACQ2605 | 2  |
| SSEO434-16   | Gigantidas horikoshii  |         |              |    |
| SSEO394-16   | Ginebis argenteonitens | Species | BOLD:ACY9249 | 3  |
| SSEO400-16   | Ginebis argenteonitens |         |              |    |
| SSEO393-16   | Ginebis argenteonitens |         |              |    |
| QWEAS1217-15 | Globivenus toreuma     | Species | BOLD:AAO8887 | 3  |
| SSEO754-16   | Glycymeris reevei      | Species | BOLD:AAY0660 | 2  |
| SSEO755-16   | Glycymeris rotunda     | Species | BOLD:AAY0659 | 2  |
| SSEO1138-16  | Golikovia ennae        | Species | BOLD:AAY0973 | 2  |
| SSEO1137-16  | Golikovia fukueae      | Species | BOLD:AAY0975 | 2  |
| SSEO323-16   | Gonatopsis borealis    | Species | BOLD:ACH8106 | 2  |
| SSEO324-16   | Gonatopsis octopedatus | Species | BOLD:AAL3847 | 4  |
| SSEO306-16   | Gonatus kamtschaticus  | Species | BOLD:AAE3425 | 3  |
| SSEO401-16   | Granata lyrata         | Species | BOLD:ACY9350 | 2  |
| SSEO404-16   | Granata lyrata         |         |              |    |
| SSEO1323-16  | Guildfordia triumphans | Species | BOLD:AAI6429 | 4  |
| SSEO1324-16  | Guildfordia triumphans |         |              |    |
| SSEO1325-16  | Guildfordia yoka       | Species | BOLD:AAF7349 | 6  |
| SSEO1326-16  | Guildfordia yoka       |         |              |    |



|             |                   |         |              |     |
|-------------|-------------------|---------|--------------|-----|
| SSEO1327-16 | Guildfordia yoka  |         |              |     |
| SSEO112-16  | Haminoea japonica | Species | BOLD:ACH4494 | 14  |
| SSEO149-16  | Haminoea japonica |         |              |     |
| SSEO115-16  | Haminoea japonica |         |              |     |
| SSEO147-16  | Haminoea japonica |         |              |     |
| SSEO113-16  | Haminoea japonica |         |              |     |
| SSEO146-16  | Haminoea japonica |         |              |     |
| SSEO114-16  | Haminoea japonica |         |              |     |
| SSEO148-16  | Haminoea japonica | Species | BOLD:ACH5215 | 10  |
| SSEO118-16  | Haminoea japonica | Species | BOLD:ACH4492 | 31  |
| SSEO151-16  | Haminoea japonica |         |              |     |
| SSEO155-16  | Haminoea japonica |         |              |     |
| SSEO156-16  | Haminoea japonica |         |              |     |
| SSEO153-16  | Haminoea japonica |         |              |     |
| SSEO154-16  | Haminoea japonica |         |              |     |
| SSEO119-16  | Haminoea japonica |         |              |     |
| SSEO152-16  | Haminoea japonica |         |              |     |
| SSEO150-16  | Haminoea japonica |         |              |     |
| SSEO117-16  | Haminoea japonica |         |              |     |
| SSEO121-16  | Haminoea japonica | Species | BOLD:ACI2127 | 128 |
| SSEO142-16  | Haminoea japonica |         |              |     |
| SSEO132-16  | Haminoea japonica |         |              |     |
| SSEO137-16  | Haminoea japonica |         |              |     |
| SSEO125-16  | Haminoea japonica |         |              |     |
| SSEO129-16  | Haminoea japonica |         |              |     |
| SSEO131-16  | Haminoea japonica |         |              |     |

|             |                        |         |              |    |
|-------------|------------------------|---------|--------------|----|
| SSEO130-16  | Haminoea japonica      |         |              |    |
| SSEO144-16  | Haminoea japonica      |         |              |    |
| SSEO140-16  | Haminoea japonica      |         |              |    |
| SSEO139-16  | Haminoea japonica      |         |              |    |
| SSEO141-16  | Haminoea japonica      |         |              |    |
| SSEO134-16  | Haminoea japonica      |         |              |    |
| SSEO143-16  | Haminoea japonica      |         |              |    |
| SSEO136-16  | Haminoea japonica      |         |              |    |
| SSEO120-16  | Haminoea japonica      |         |              |    |
| SSEO127-16  | Haminoea japonica      |         |              |    |
| SSEO133-16  | Haminoea japonica      |         |              |    |
| SSEO145-16  | Haminoea japonica      |         |              |    |
| SSEO135-16  | Haminoea japonica      |         |              |    |
| SSEO124-16  | Haminoea japonica      |         |              |    |
| SSEO128-16  | Haminoea japonica      |         |              |    |
| SSEO123-16  | Haminoea japonica      |         |              |    |
| SSEO138-16  | Haminoea japonica      |         |              |    |
| SSEO116-16  | Haminoea japonica      |         |              |    |
| SSEO122-16  | Haminoea japonica      |         |              |    |
| SSEO126-16  | Haminoea japonica      |         |              |    |
| SSEO351-16  | Hapalochlaena fasciata | Species | BOLD:AAY1713 | 2  |
| QWEAS217-15 | Hapalochlaena maculosa | Species | BOLD:ABA8620 | 3  |
| SSEO779-16  | Hazuregyra watanabei   | Species | BOLD:ACP9863 | 2  |
| QWEAS267-15 | Hemifusus colosseus    | Species | BOLD:AAI6811 | 7  |
| QWEAS266-15 | Hemifusus colosseus    |         |              |    |
| SSEO1428-16 | Hemifusus ternatanus   | Species | BOLD:ABY6656 | 13 |

|             |                       |         |              |    |
|-------------|-----------------------|---------|--------------|----|
| SSEO1429-16 | Hemifusus ternatanus  |         |              |    |
| SSEO1430-16 | Hemifusus ternatanus  |         |              |    |
| QWEAS269-15 | Hemifusus ternatanus  |         |              |    |
| QWEAS270-15 | Hemifusus ternatanus  |         |              |    |
| QWEAS271-15 | Hemifusus ternatanus  |         |              |    |
| QWEAS268-15 | Hemifusus ternatanus  |         |              |    |
| QWEAS272-15 | Hemifusus ternatanus  |         |              |    |
| QWEAS276-15 | Hemifusus tuba        | Species | BOLD:ACX3419 | 8  |
| QWEAS279-15 | Hemifusus tuba        |         |              |    |
| QWEAS273-15 | Hemifusus tuba        |         |              |    |
| QWEAS277-15 | Hemifusus tuba        |         |              |    |
| QWEAS280-15 | Hemifusus tuba        |         |              |    |
| QWEAS274-15 | Hemifusus tuba        |         |              |    |
| QWEAS278-15 | Hemifusus tuba        |         |              |    |
| QWEAS275-15 | Hemifusus tuba        |         |              |    |
| SSEO211-16  | Heterololigo bleekeri | Species | BOLD:AAB9046 | 47 |
| SSEO213-16  | Heterololigo bleekeri |         |              |    |
| SSEO198-16  | Heterololigo bleekeri |         |              |    |
| SSEO215-16  | Heterololigo bleekeri |         |              |    |
| SSEO205-16  | Heterololigo bleekeri |         |              |    |
| SSEO201-16  | Heterololigo bleekeri |         |              |    |
| SSEO202-16  | Heterololigo bleekeri |         |              |    |
| SSEO203-16  | Heterololigo bleekeri |         |              |    |
| SSEO207-16  | Heterololigo bleekeri |         |              |    |
| SSEO200-16  | Heterololigo bleekeri |         |              |    |
| SSEO196-16  | Heterololigo bleekeri |         |              |    |

|             |                          |         |              |    |
|-------------|--------------------------|---------|--------------|----|
| SSEO228-16  | Heterololigo bleekeri    |         |              |    |
| SSEO224-16  | Heterololigo bleekeri    |         |              |    |
| SSEO226-16  | Heterololigo bleekeri    |         |              |    |
| SSEO220-16  | Heterololigo bleekeri    |         |              |    |
| SSEO216-16  | Heterololigo bleekeri    |         |              |    |
| SSEO222-16  | Heterololigo bleekeri    |         |              |    |
| SSEO212-16  | Heterololigo bleekeri    |         |              |    |
| SSEO197-16  | Heterololigo bleekeri    |         |              |    |
| SSEO422-16  | Homalopoma granuliferum  | Species | BOLD:AAI8216 | 4  |
| SSEO411-16  | Homalopoma granuliferum  |         |              |    |
| SSEO410-16  | Homalopoma nocturnum     | Species | BOLD:AAX1073 | 2  |
| SSEO408-16  | Homalopoma sangarensense | Species | BOLD:AAX1078 | 2  |
| SSEO289-16  | Idiosepius paradoxus     | Species | BOLD:ACH3045 | 4  |
| SSEO288-16  | Idiosepius paradoxus     |         |              |    |
| QWEAS879-15 | Isognomon ephippium      |         |              |    |
| QWEAS877-15 | Isognomon ephippium      |         |              |    |
| QWEAS880-15 | Isognomon ephippium      | Species | BOLD:ACX5630 | 5  |
| QWEAS878-15 | Isognomon ephippium      |         |              |    |
| QWEAS876-15 | Isognomon ephippium      |         |              |    |
| QWEAS871-15 | Isognomon legumen        |         |              |    |
| QWEAS870-15 | Isognomon legumen        |         |              |    |
| QWEAS872-15 | Isognomon legumen        | Species | BOLD:ACX5794 | 5  |
| QWEAS873-15 | Isognomon legumen        |         |              |    |
| QWEAS874-15 | Isognomon legumen        |         |              |    |
| SSEO1434-16 | Kelletia lischkei        | Species | BOLD:ACB7423 | 10 |
| SSEO1431-16 | Kelletia lischkei        |         |              |    |

|             |                   |         |              |    |
|-------------|-------------------|---------|--------------|----|
| SSEO1432-16 | Kelletia lischkei |         |              |    |
| SSEO1435-16 | Kelletia lischkei |         |              |    |
| SSEO1433-16 | Kelletia lischkei |         |              |    |
| QWEAS505-15 | Lambis lambis     | Species | BOLD:AAX0552 | 7  |
| QWEAS506-15 | Lambis lambis     |         |              |    |
| QWEAS507-15 | Lambis lambis     |         |              |    |
| SSEO835-16  | Lepetodrilus nux  | Species | BOLD:AAE4120 | 75 |
| SSEO832-16  | Lepetodrilus nux  |         |              |    |
| SSEO827-16  | Lepetodrilus nux  |         |              |    |
| SSEO857-16  | Lepetodrilus nux  |         |              |    |
| SSEO839-16  | Lepetodrilus nux  |         |              |    |
| SSEO840-16  | Lepetodrilus nux  |         |              |    |
| SSEO858-16  | Lepetodrilus nux  |         |              |    |
| SSEO861-16  | Lepetodrilus nux  |         |              |    |
| SSEO865-16  | Lepetodrilus nux  |         |              |    |
| SSEO855-16  | Lepetodrilus nux  |         |              |    |
| SSEO828-16  | Lepetodrilus nux  |         |              |    |
| SSEO863-16  | Lepetodrilus nux  |         |              |    |
| SSEO830-16  | Lepetodrilus nux  |         |              |    |
| SSEO860-16  | Lepetodrilus nux  |         |              |    |
| SSEO849-16  | Lepetodrilus nux  |         |              |    |
| SSEO853-16  | Lepetodrilus nux  |         |              |    |
| SSEO831-16  | Lepetodrilus nux  |         |              |    |
| SSEO852-16  | Lepetodrilus nux  |         |              |    |
| SSEO848-16  | Lepetodrilus nux  |         |              |    |
| SSEO851-16  | Lepetodrilus nux  |         |              |    |

|            |                     |         |              |    |
|------------|---------------------|---------|--------------|----|
| SSEO862-16 | Lepetodrilus nux    |         |              |    |
| SSEO833-16 | Lepetodrilus nux    |         |              |    |
| SSEO859-16 | Lepetodrilus nux    |         |              |    |
| SSEO864-16 | Lepetodrilus nux    |         |              |    |
| SSEO850-16 | Lepetodrilus nux    |         |              |    |
| SSEO834-16 | Lepetodrilus nux    |         |              |    |
| SSEO822-16 | Lepetodrilus nux    |         |              |    |
| SSEO837-16 | Lepetodrilus nux    |         |              |    |
| SSEO854-16 | Lepetodrilus nux    |         |              |    |
| SSEO866-16 | Lepetodrilus nux    |         |              |    |
| SSEO829-16 | Lepetodrilus nux    |         |              |    |
| SSEO836-16 | Lepetodrilus nux    |         |              |    |
| SSEO856-16 | Lepetodrilus nux    |         |              |    |
| SSEO838-16 | Lepetodrilus nux    |         |              |    |
| SSEO826-16 | Lepetodrilus nux    |         |              |    |
| SSEO847-16 | Limalepeta lima     | Species | BOLD:ACB8179 | 4  |
| SSEO846-16 | Limalepeta lima     |         |              |    |
| SSEO361-16 | Limnoperla fortunei |         |              |    |
| SSEO348-16 | Limnoperla fortunei |         |              |    |
| SSEO365-16 | Limnoperla fortunei |         |              |    |
| SSEO371-16 | Limnoperla fortunei |         |              |    |
| SSEO363-16 | Limnoperla fortunei | Species | BOLD:AAJ2118 | 79 |
| SSEO347-16 | Limnoperla fortunei |         |              |    |
| SSEO356-16 | Limnoperla fortunei |         |              |    |
| SSEO373-16 | Limnoperla fortunei |         |              |    |
| SSEO372-16 | Limnoperla fortunei |         |              |    |

|              |                        |         |              |    |
|--------------|------------------------|---------|--------------|----|
| SSEO359-16   | Limnoperna fortunei    |         |              |    |
| SSEO374-16   | Limnoperna fortunei    |         |              |    |
| SSEO369-16   | Limnoperna fortunei    |         |              |    |
| SSEO368-16   | Limnoperna fortunei    |         |              |    |
| SSEO346-16   | Limnoperna fortunei    |         |              |    |
| SSEO358-16   | Limnoperna fortunei    |         |              |    |
| SSEO362-16   | Limnoperna fortunei    |         |              |    |
| SSEO364-16   | Limnoperna fortunei    |         |              |    |
| SSEO370-16   | Limnoperna fortunei    |         |              |    |
| SSEO357-16   | Limnoperna fortunei    |         |              |    |
| SSEO360-16   | Limnoperna fortunei    |         |              |    |
| SSEO794-16   | Lirularia iridescens   | Species | BOLD:AAJ2105 | 4  |
| SSEO795-16   | Lirularia iridescens   |         |              |    |
| SSEO797-16   | Lirularia pygmaea      | Species | BOLD:ACB7356 | 4  |
| SSEO796-16   | Lirularia pygmaea      |         |              |    |
| SSEO1015-16  | Littoraria intermedia  | Species | BOLD:ACH3623 | 8  |
| QWEAS1506-15 | Littoraria melanostoma | Species | BOLD:ACB7954 | 3  |
| SSEO1017-16  | Littoraria pallescens  | Species | BOLD:AAO8511 | 8  |
| SSEO1016-16  | Littoraria pallescens  |         |              |    |
| SSEO1018-16  | Littoraria scabra      | Species | BOLD:AAK6714 | 30 |
| SSEO980-16   | Littoraria sinensis    | Species | BOLD:ACH3757 | 6  |
| SSEO986-16   | Littorina brevicula    |         |              |    |
| QWEAS556-15  | Littorina brevicula    | Species | BOLD:ACB8372 | 12 |
| QWEAS555-15  | Littorina brevicula    |         |              |    |
| QWEAS554-15  | Littorina brevicula    |         |              |    |
| SSEO985-16   | Littorina horikawai    | Species | BOLD:ACB8147 | 2  |

|             |                       |         |              |    |
|-------------|-----------------------|---------|--------------|----|
| SSEO984-16  | Littorina kasatka     | Species | BOLD:ACB7143 | 2  |
| SSEO983-16  | Littorina mandshurica | Species | BOLD:ACB8237 | 2  |
| SSEO982-16  | Littorina squalida    | Species | BOLD:ACB8238 | 2  |
| QWEAS111-15 | Loliolus beka         | Species | BOLD:ABA8796 | 21 |
| QWEAS112-15 | Loliolus beka         |         |              |    |
| QWEAS109-15 | Loliolus beka         |         |              |    |
| QWEAS110-15 | Loliolus beka         |         |              |    |
| QWEAS113-15 | Loliolus beka         |         |              |    |
| QWEAS106-15 | Loliolus beka         |         |              |    |
| QWEAS107-15 | Loliolus beka         |         |              |    |
| QWEAS115-15 | Loliolus beka         | Species | BOLD:ABA8797 | 24 |
| QWEAS116-15 | Loliolus beka         |         |              |    |
| QWEAS119-15 | Loliolus beka         |         |              |    |
| QWEAS114-15 | Loliolus beka         |         |              |    |
| QWEAS117-15 | Loliolus beka         |         |              |    |
| QWEAS105-15 | Loliolus beka         |         |              |    |
| QWEAS118-15 | Loliolus beka         |         |              |    |
| QWEAS108-15 | Loliolus beka         | Species | BOLD:ABA8798 | 15 |
| QWEAS123-15 | Loliolus uyii         |         |              |    |
| QWEAS120-15 | Loliolus uyii         |         |              |    |
| QWEAS124-15 | Loliolus uyii         |         |              |    |
| QWEAS121-15 | Loliolus uyii         |         |              |    |
| QWEAS122-15 | Loliolus uyii         | Species | BOLD:ACS6007 | 17 |
| QWEAS406-15 | Lottia cassis         |         |              |    |
| QWEAS411-15 | Lottia cassis         |         |              |    |
| QWEAS408-15 | Lottia cassis         |         |              |    |



|             |                     |         |              |    |
|-------------|---------------------|---------|--------------|----|
| QWEAS409-15 | Lottia cassis       |         |              |    |
| QWEAS410-15 | Lottia cassis       |         |              |    |
| QWEAS407-15 | Lottia cassis       |         |              |    |
| QWEAS397-15 | Lottia dorsuosa     |         |              |    |
| QWEAS396-15 | Lottia dorsuosa     | Species | BOLD:ACS4419 | 6  |
| QWEAS395-15 | Lottia dorsuosa     |         |              |    |
| SSEO522-16  | Lottia kogamogai    | Species | BOLD:AAX6537 | 2  |
| SSEO526-16  | Lottia langfordi    | Species | BOLD:AAX6536 | 2  |
| SSEO527-16  | Lottia lindbergi    | Species | BOLD:AAX6534 | 2  |
| SSEO528-16  | Lottia luchuana     |         |              |    |
| QWEAS414-15 | Lottia luchuana     |         |              |    |
| QWEAS418-15 | Lottia luchuana     |         |              |    |
| QWEAS412-15 | Lottia luchuana     |         |              |    |
| QWEAS415-15 | Lottia luchuana     | Species | BOLD:AAJ2353 | 16 |
| QWEAS416-15 | Lottia luchuana     |         |              |    |
| QWEAS417-15 | Lottia luchuana     |         |              |    |
| QWEAS413-15 | Lottia luchuana     |         |              |    |
| QWEAS419-15 | Lottia luchuana     | Species | BOLD:ACX3578 | 2  |
| SSEO524-16  | Lottia tenuisculpta | Species | BOLD:AAX6505 | 2  |
| SSEO1281-16 | Lunella ogasawarana |         |              |    |
| SSEO1272-16 | Lunella ogasawarana |         |              |    |
| SSEO1277-16 | Lunella ogasawarana |         |              |    |
| SSEO1279-16 | Lunella ogasawarana | Species | BOLD:AAE3889 | 20 |
| SSEO1280-16 | Lunella ogasawarana |         |              |    |
| SSEO1275-16 | Lunella ogasawarana |         |              |    |
| SSEO1276-16 | Lunella ogasawarana |         |              |    |

|              |                       |         |              |    |
|--------------|-----------------------|---------|--------------|----|
| SSEO1282-16  | Lunella ogasawarana   |         |              |    |
| SSEO1273-16  | Lunella ogasawarana   |         |              |    |
| SSEO1278-16  | Lunella ogasawarana   |         |              |    |
| QWEAS1292-15 | Lutraria arcuata      |         |              |    |
| QWEAS1291-15 | Lutraria arcuata      | Species | BOLD:ACH8903 | 6  |
| QWEAS1293-15 | Lutraria arcuata      |         |              |    |
| QWEAS1290-15 | Lutraria australis    | Species | BOLD:ACH7908 | 4  |
| QWEAS581-15  | Macoma candida        | Species | BOLD:ACQ7092 | 4  |
| QWEAS578-15  | Macoma tokyoensis     |         |              |    |
| QWEAS579-15  | Macoma tokyoensis     | Species | BOLD:ACQ2628 | 5  |
| SSEO438-16   | Macroschisma dilatata | Species | BOLD:AAJ1496 | 2  |
| SSEO441-16   | Macroschisma dilatata | Species | BOLD:AAJ1495 | 2  |
| QWEAS1433-15 | Mactra chinensis      |         |              |    |
| QWEAS1437-15 | Mactra chinensis      |         |              |    |
| QWEAS1432-15 | Mactra chinensis      |         |              |    |
| QWEAS1436-15 | Mactra chinensis      |         |              |    |
| QWEAS1430-15 | Mactra chinensis      |         |              |    |
| QWEAS1434-15 | Mactra chinensis      |         |              |    |
| QWEAS1435-15 | Mactra chinensis      |         |              |    |
| QWEAS1431-15 | Mactra chinensis      | Species | BOLD:AAX3441 | 84 |
| QWEAS1277-15 | Mactra chinensis      |         |              |    |
| QWEAS1275-15 | Mactra chinensis      |         |              |    |
| QWEAS1278-15 | Mactra chinensis      |         |              |    |
| QWEAS1279-15 | Mactra chinensis      |         |              |    |
| QWEAS1274-15 | Mactra chinensis      |         |              |    |
| QWEAS1276-15 | Mactra chinensis      |         |              |    |

|              |                               |         |              |    |
|--------------|-------------------------------|---------|--------------|----|
| QWEAS1289-15 | <i>Mactra cumingii</i>        |         |              |    |
| QWEAS1287-15 | <i>Mactra cumingii</i>        | Species | BOLD:ACH8792 | 6  |
| QWEAS1288-15 | <i>Mactra cumingii</i>        |         |              |    |
| QWEAS1267-15 | <i>Mactra maculata</i>        | Species | BOLD:ACH8794 | 4  |
| QWEAS1266-15 | <i>Mactra maculata</i>        |         |              |    |
| QWEAS1273-15 | <i>Mactra</i> sp.             | Species | BOLD:ACH8793 | 12 |
| QWEAS1271-15 | <i>Mactra</i> sp.             |         |              |    |
| QWEAS1268-15 | <i>Mactra</i> sp.             |         |              |    |
| QWEAS1269-15 | <i>Mactra</i> sp.             |         |              |    |
| QWEAS1270-15 | <i>Mactra</i> sp.             |         |              |    |
| QWEAS1272-15 | <i>Mactra</i> sp.             |         |              |    |
| SSEO1111-16  | <i>Mancinella echinata</i>    | Species | BOLD:ACB8741 | 6  |
| QWEAS1157-15 | <i>Marcia japonica</i>        | Species | BOLD:AAK7715 | 27 |
| QWEAS1241-15 | <i>Marcia japonica</i>        |         |              |    |
| QWEAS1240-15 | <i>Marcia japonica</i>        |         |              |    |
| QWEAS1242-15 | <i>Marcia japonica</i>        |         |              |    |
| QWEAS1238-15 | <i>Marcia japonica</i>        |         |              |    |
| QWEAS1160-15 | <i>Marcia japonica</i>        |         |              |    |
| QWEAS1159-15 | <i>Marcia japonica</i>        |         |              |    |
| QWEAS1158-15 | <i>Marcia japonica</i>        |         |              |    |
| QWEAS1239-15 | <i>Marcia japonica</i>        |         |              |    |
| QWEAS1161-15 | <i>Marcia japonica</i>        |         |              |    |
| QWEAS501-15  | <i>Margistrombus robustus</i> | Species | BOLD:ACB7311 | 10 |
| QWEAS497-15  | <i>Margistrombus robustus</i> |         |              |    |
| QWEAS500-15  | <i>Margistrombus robustus</i> |         |              |    |
| QWEAS498-15  | <i>Margistrombus robustus</i> |         |              |    |

|              |                        |         |              |    |
|--------------|------------------------|---------|--------------|----|
| QWEAS499-15  | Margistrombus robustus |         |              |    |
| QWEAS1542-15 | Martesia striata       | Species | BOLD:ACH5863 | 8  |
| QWEAS1541-15 | Martesia striata       |         |              |    |
| QWEAS520-15  | Mauritia arabica       | Species | BOLD:AAC4112 | 12 |
| QWEAS521-15  | Mauritia arabica       |         |              |    |
| QWEAS523-15  | Mauritia arabica       |         |              |    |
| QWEAS522-15  | Mauritia arabica       |         |              |    |
| SSEO106-16   | Melanochlamys ezoensis | Species | BOLD:ACQ8416 | 15 |
| SSEO110-16   | Melanochlamys ezoensis |         |              |    |
| SSEO107-16   | Melanochlamys ezoensis |         |              |    |
| SSEO105-16   | Melanochlamys ezoensis |         |              |    |
| SSEO109-16   | Melanochlamys ezoensis |         |              |    |
| SSEO108-16   | Melanochlamys ezoensis |         |              |    |
| SSEO111-16   | Melanochlamys ezoensis |         |              |    |
| SSEO086-16   | Melanochlamys fukudai  | Species | BOLD:ACQ1294 | 50 |
| SSEO100-16   | Melanochlamys fukudai  |         |              |    |
| SSEO097-16   | Melanochlamys fukudai  |         |              |    |
| SSEO083-16   | Melanochlamys fukudai  |         |              |    |
| SSEO099-16   | Melanochlamys fukudai  |         |              |    |
| SSEO095-16   | Melanochlamys fukudai  |         |              |    |
| SSEO085-16   | Melanochlamys fukudai  |         |              |    |
| SSEO084-16   | Melanochlamys fukudai  |         |              |    |
| SSEO088-16   | Melanochlamys fukudai  |         |              |    |
| SSEO089-16   | Melanochlamys fukudai  |         |              |    |
| SSEO090-16   | Melanochlamys fukudai  |         |              |    |
| SSEO096-16   | Melanochlamys fukudai  |         |              |    |

|            |                       |         |              |   |
|------------|-----------------------|---------|--------------|---|
| SSEO080-16 | Melanochlamys fukudai |         |              |   |
| SSEO102-16 | Melanochlamys fukudai |         |              |   |
| SSEO082-16 | Melanochlamys fukudai |         |              |   |
| SSEO104-16 | Melanochlamys fukudai |         |              |   |
| SSEO087-16 | Melanochlamys fukudai |         |              |   |
| SSEO091-16 | Melanochlamys fukudai |         |              |   |
| SSEO081-16 | Melanochlamys fukudai |         |              |   |
| SSEO098-16 | Melanochlamys fukudai |         |              |   |
| SSEO094-16 | Melanochlamys fukudai |         |              |   |
| SSEO101-16 | Melanochlamys fukudai |         |              |   |
| SSEO103-16 | Melanochlamys fukudai |         |              |   |
| SSEO092-16 | Melanochlamys fukudai |         |              |   |
| SSEO093-16 | Melanochlamys fukudai |         |              |   |
| SSEO079-16 | Melanochlamys kohi    |         |              |   |
| SSEO077-16 | Melanochlamys kohi    | Species | BOLD:ACQ4317 | 8 |
| SSEO078-16 | Melanochlamys kohi    |         |              |   |

|             |                       |         |              |     |
|-------------|-----------------------|---------|--------------|-----|
| QWEAS315-15 | Melo melo             |         |              |     |
| QWEAS314-15 | Melo melo             | Species | BOLD:ACH8424 | 8   |
| QWEAS313-15 | Melo melo             |         |              |     |
| QWEAS312-15 | Melo melo             |         |              |     |
| SSEO487-16  | Mercenaria mercenaria |         |              |     |
| SSEO500-16  | Mercenaria mercenaria | Species | BOLD:AAA3989 | 216 |
| SSEO495-16  | Mercenaria mercenaria |         |              |     |
| SSEO525-16  | Mercenaria mercenaria |         |              |     |

|            |                       |
|------------|-----------------------|
| SSEO501-16 | Mercenaria mercenaria |
| SSEO516-16 | Mercenaria mercenaria |
| SSEO465-16 | Mercenaria mercenaria |
| SSEO489-16 | Mercenaria mercenaria |
| SSEO514-16 | Mercenaria mercenaria |
| SSEO467-16 | Mercenaria mercenaria |
| SSEO488-16 | Mercenaria mercenaria |
| SSEO484-16 | Mercenaria mercenaria |
| SSEO513-16 | Mercenaria mercenaria |
| SSEO470-16 | Mercenaria mercenaria |
| SSEO572-16 | Mercenaria mercenaria |
| SSEO486-16 | Mercenaria mercenaria |
| SSEO520-16 | Mercenaria mercenaria |
| SSEO509-16 | Mercenaria mercenaria |
| SSEO519-16 | Mercenaria mercenaria |
| SSEO512-16 | Mercenaria mercenaria |
| SSEO471-16 | Mercenaria mercenaria |
| SSEO506-16 | Mercenaria mercenaria |
| SSEO490-16 | Mercenaria mercenaria |
| SSEO523-16 | Mercenaria mercenaria |
| SSEO469-16 | Mercenaria mercenaria |
| SSEO505-16 | Mercenaria mercenaria |
| SSEO515-16 | Mercenaria mercenaria |
| SSEO511-16 | Mercenaria mercenaria |
| SSEO521-16 | Mercenaria mercenaria |
| SSEO493-16 | Mercenaria mercenaria |

|              |                       |         |              |    |
|--------------|-----------------------|---------|--------------|----|
| SSEO518-16   | Mercenaria mercenaria |         |              |    |
| SSEO492-16   | Mercenaria mercenaria |         |              |    |
| SSEO507-16   | Mercenaria mercenaria |         |              |    |
| SSEO503-16   | Mercenaria mercenaria |         |              |    |
| SSEO517-16   | Mercenaria mercenaria |         |              |    |
| SSEO491-16   | Mercenaria mercenaria |         |              |    |
| QWEAS1452-15 | Mercenaria mercenaria |         |              |    |
| QWEAS1453-15 | Mercenaria mercenaria |         |              |    |
| QWEAS1450-15 | Mercenaria mercenaria |         |              |    |
| QWEAS1451-15 | Mercenaria mercenaria |         |              |    |
| QWEAS947-15  | Mercenaria mercenaria |         |              |    |
| QWEAS946-15  | Mercenaria mercenaria |         |              |    |
| QWEAS950-15  | Mercenaria mercenaria |         |              |    |
| QWEAS948-15  | Mercenaria mercenaria |         |              |    |
| QWEAS951-15  | Mercenaria mercenaria |         |              |    |
| QWEAS949-15  | Mercenaria mercenaria |         |              |    |
| QWEAS1494-15 | Meretrix lamarckii    | Species | BOLD:AAE9722 | 25 |
| QWEAS1493-15 | Meretrix lamarckii    |         |              |    |
| QWEAS1065-15 | Meretrix lamarckii    |         |              |    |
| QWEAS1063-15 | Meretrix lamarckii    |         |              |    |
| QWEAS1064-15 | Meretrix lamarckii    |         |              |    |
| QWEAS1066-15 | Meretrix lamarckii    |         |              |    |
| SSEO564-16   | Meretrix lusoria      | Species | BOLD:AAD4072 | 27 |
| SSEO1365-16  | Meretrix lusoria      |         |              |    |
| SSEO569-16   | Meretrix lusoria      |         |              |    |
| SSEO568-16   | Meretrix lusoria      |         |              |    |

|              |                         |         |              |    |
|--------------|-------------------------|---------|--------------|----|
| SSEO571-16   | Meretrix lusoria        |         |              |    |
| SSEO873-16   | Mikadotrochus beyrichii | Species | BOLD:AAG5178 | 4  |
| SSEO887-16   | Mikadotrochus beyrichii |         |              |    |
| SSEO1443-16  | Mitrella bicincta       | Species | BOLD:ACB6968 | 9  |
| SSEO1446-16  | Mitrella bicincta       |         |              |    |
| QWEAS259-15  | Mitrella bicincta       |         |              |    |
| QWEAS263-15  | Mitrella bicincta       |         |              |    |
| QWEAS260-15  | Mitrella bicincta       |         |              |    |
| QWEAS262-15  | Mitrella bicincta       |         |              |    |
| QWEAS261-15  | Mitrella bicincta       |         |              |    |
| QWEAS067-15  | Modiolus auriculatus    | Species | BOLD:ACQ2675 | 2  |
| QWEAS068-15  | Modiolus elongatus      | Species | BOLD:ACQ6657 | 2  |
| QWEAS1373-15 | Modiolus kurilensis     | Species | BOLD:ACV6375 | 12 |
| QWEAS1374-15 | Modiolus kurilensis     |         |              |    |
| QWEAS1372-15 | Modiolus kurilensis     |         |              |    |
| QWEAS1370-15 | Modiolus kurilensis     |         |              |    |
| QWEAS1369-15 | Modiolus kurilensis     |         |              |    |
| QWEAS1371-15 | Modiolus kurilensis     |         |              |    |
| QWEAS069-15  | Modiolus metcalfei      | Species | BOLD:ACQ2878 | 8  |
| QWEAS072-15  | Modiolus metcalfei      |         |              |    |
| QWEAS071-15  | Modiolus metcalfei      |         |              |    |
| QWEAS070-15  | Modiolus metcalfei      |         |              |    |
| SSEO792-16   | Monilea smithi          | Species | BOLD:ACB8008 | 4  |
| SSEO793-16   | Monilea smithi          |         |              |    |
| SSEO1453-16  | Monodonta australis     | Species | BOLD:ACB7447 | 7  |
| SSEO1450-16  | Monodonta australis     |         |              |    |



|             |                         |         |              |    |
|-------------|-------------------------|---------|--------------|----|
| SSEO1452-16 | Monodonta australis     | Species | BOLD:ACB7257 | 10 |
| SSEO1454-16 | Monodonta australis     |         |              |    |
| SSEO1455-16 | Monodonta australis     |         |              |    |
| SSEO1456-16 | Monodonta australis     |         |              |    |
| SSEO1451-16 | Monodonta australis     |         |              |    |
| SSEO824-16  | Monodonta canalifera    | Species | BOLD:AAG7382 | 4  |
| SSEO823-16  | Monodonta canalifera    |         |              |    |
| SSEO1127-16 | Morula funiculata       | Species | BOLD:ACH9039 | 6  |
| SSEO1129-16 | Morula funiculata       |         |              |    |
| SSEO1126-16 | Morula funiculata       |         |              |    |
| SSEO1135-16 | Morula japonica         | Species | BOLD:ACH9037 | 2  |
| SSEO1136-16 | Morula rumphiusi        | Species | BOLD:ACH5962 | 2  |
| QWEAS285-15 | Morula sp.              | Species | BOLD:ACX3606 | 3  |
| QWEAS286-15 | Morula sp.              |         |              |    |
| SSEO1131-16 | Morula striata          | Species | BOLD:ACY9406 | 3  |
| SSEO1132-16 | Morula striata          | Species | BOLD:ACH4892 | 3  |
| SSEO869-16  | Munditiella ammonoceras | Species | BOLD:AAG1056 | 4  |
| SSEO870-16  | Munditiella ammonoceras |         |              |    |
| QWEAS372-15 | Murex trapa             | Species | BOLD:ACI2167 | 12 |
| QWEAS369-15 | Murex trapa             |         |              |    |
| QWEAS370-15 | Murex trapa             |         |              |    |
| QWEAS373-15 | Murex trapa             |         |              |    |
| QWEAS371-15 | Murex trapa             |         |              |    |
| SSEO453-16  | Musculista senhousia    | Species | BOLD:AAB4685 | 15 |
| QWEAS093-15 | Mya arenaria            | Species | BOLD:ABX1812 | 18 |
| QWEAS092-15 | Mya arenaria            |         |              |    |

|              |                        |         |              |    |
|--------------|------------------------|---------|--------------|----|
| QWEAS1544-15 | Nassarius conoidalis   |         |              |    |
| QWEAS1545-15 | Nassarius conoidalis   | Species | BOLD:ACI2486 | 6  |
| QWEAS1543-15 | Nassarius conoidalis   |         |              |    |
| QWEAS307-15  | Nassarius festivus     | Species | BOLD:ACH7262 | 28 |
| QWEAS305-15  | Nassarius festivus     |         |              |    |
| QWEAS303-15  | Nassarius festivus     |         |              |    |
| QWEAS306-15  | Nassarius festivus     |         |              |    |
| QWEAS308-15  | Nassarius festivus     |         |              |    |
| QWEAS309-15  | Nassarius festivus     |         |              |    |
| QWEAS1561-15 | Nassarius livescens    | Species | BOLD:ACH4907 | 2  |
| QWEAS1564-15 | Nassarius livescens    | Species | BOLD:ACH4906 | 6  |
| QWEAS1562-15 | Nassarius livescens    |         |              |    |
| QWEAS1563-15 | Nassarius livescens    |         |              |    |
| QWEAS1550-15 | Nassarius pullus       | Species | BOLD:ACH4905 | 14 |
| QWEAS1554-15 | Nassarius pullus       |         |              |    |
| QWEAS1549-15 | Nassarius pullus       |         |              |    |
| QWEAS1551-15 | Nassarius pullus       |         |              |    |
| QWEAS1553-15 | Nassarius pullus       |         |              |    |
| QWEAS1548-15 | Nassarius pullus       |         |              |    |
| QWEAS1552-15 | Nassarius pullus       |         |              |    |
| QWEAS1546-15 | Nassarius semiplicatus | Species | BOLD:ACH4904 | 4  |
| QWEAS1547-15 | Nassarius semiplicatus |         |              |    |
| QWEAS535-15  | Natica lineata         | Species | BOLD:ACB7071 | 8  |
| QWEAS534-15  | Natica lineata         |         |              |    |
| QWEAS537-15  | Natica lineata         |         |              |    |
| QWEAS536-15  | Natica lineata         |         |              |    |

|              |                             |         |              |     |
|--------------|-----------------------------|---------|--------------|-----|
| SSEO1154-16  | <i>Neptunea constricta</i>  | Species | BOLD:AAM1847 | 4   |
| SSEO1467-16  | <i>Neptunea cumingi</i>     | Species | BOLD:ACF4244 | 4   |
| SSEO1466-16  | <i>Neptunea cumingi</i>     |         |              |     |
| SSEO1161-16  | <i>Neptunea mikawaensis</i> | Species | BOLD:AAX6641 | 2   |
| SSEO1163-16  | <i>Neptunea polycostata</i> | Species | BOLD:AAH6465 | 6   |
| SSEO1162-16  | <i>Neptunea polycostata</i> |         |              |     |
| SSEO510-16   | <i>Nerita albicilla</i>     | Species | BOLD:AAA1276 | 234 |
| SSEO479-16   | <i>Nerita helicinoides</i>  | Species | BOLD:AAH0947 | 2   |
| SSEO480-16   | <i>Nerita helicinoides</i>  | Species | BOLD:AAH0946 | 2   |
| SSEO481-16   | <i>Nerita japonica</i>      | Species | BOLD:AAE5970 | 9   |
| SSEO482-16   | <i>Nerita japonica</i>      |         |              |     |
| SSEO483-16   | <i>Nerita ocellata</i>      | Species | BOLD:AAH2200 | 4   |
| SSEO485-16   | <i>Nerita ocellata</i>      |         |              |     |
| SSEO494-16   | <i>Nerita planospira</i>    | Species | BOLD:AAH2844 | 18  |
| SSEO496-16   | <i>Nerita plicata</i>       | Species | BOLD:AAA1249 | 456 |
| SSEO497-16   | <i>Nerita tristis</i>       | Species | BOLD:AAH3283 | 4   |
| SSEO498-16   | <i>Nerita tristis</i>       |         |              |     |
| QWEAS1586-15 | <i>Nerita undata</i>        | Species | BOLD:ABY4809 | 6   |
| QWEAS1587-15 | <i>Nerita undata</i>        |         |              |     |
| SSEO499-16   | <i>Nerita undata</i>        | Species | BOLD:ABY9761 | 4   |
| SSEO502-16   | <i>Nerita undata</i>        |         |              |     |
| SSEO508-16   | <i>Nerita undulata</i>      | Species | BOLD:ABZ5000 | 7   |
| SSEO504-16   | <i>Nerita undulata</i>      |         |              |     |
| QWEAS1589-15 | <i>Nerita yoldii</i>        | Species | BOLD:AAH2930 | 4   |
| QWEAS1588-15 | <i>Nerita yoldii</i>        |         |              |     |
| SSEO069-16   | <i>Neritilia littoralis</i> | Species | BOLD:AAX6363 | 2   |

|              |                                       |         |              |    |
|--------------|---------------------------------------|---------|--------------|----|
| SSEO068-16   | <i>Neritilia mimotoi</i>              | Species | BOLD:AAX6364 | 2  |
| SSEO067-16   | <i>Neritilia rubida</i>               | Species | BOLD:AAX6365 | 2  |
| SSEO458-16   | <i>Neritina asperulata</i>            | Species | BOLD:ACH4773 | 9  |
| SSEO457-16   | <i>Neritina asperulata</i>            |         |              |    |
| SSEO460-16   | <i>Neritina asperulata</i>            |         |              |    |
| SSEO463-16   | <i>Neritina iris</i>                  | Species | BOLD:ACI2200 | 7  |
| SSEO462-16   | <i>Neritina iris</i>                  |         |              |    |
| SSEO477-16   | <i>Neritina pulligera</i>             | Species | BOLD:ACH4875 | 6  |
| SSEO476-16   | <i>Neritina pulligera</i>             |         |              |    |
| SSEO531-16   | <i>Nipponacmea gloriosa</i>           | Species | BOLD:AAX1748 | 2  |
| SSEO532-16   | <i>Nipponacmea habeii</i>             | Species | BOLD:AAX6435 | 2  |
| SSEO533-16   | <i>Nipponacmea nigrans</i>            | Species | BOLD:AAX6433 | 2  |
| SSEO555-16   | <i>Nipponacmea teramachii</i>         | Species | BOLD:AAX6428 | 2  |
| SSEO354-16   | <i>Octopus conispadiceus</i>          | Species | BOLD:AAI3633 | 2  |
| SSEO342-16   | <i>Octopus incella</i>                | Species | BOLD:AAW9984 | 2  |
| SSEO343-16   | <i>Octopus laqueus</i>                | Species | BOLD:AAW9979 | 2  |
| QWEAS224-15  | <i>Octopus nanhaiensis</i>            | Species | BOLD:ABA8784 | 3  |
| SSEO353-16   | <i>Octopus oliveri</i>                | Species | BOLD:AAW9976 | 5  |
| SSEO344-16   | <i>Octopus parvus</i>                 | Species | BOLD:AAI3609 | 2  |
| SSEO345-16   | <i>Octopus wolfi</i>                  | Species | BOLD:AAW9986 | 2  |
| SSEO1478-16  | <i>Omphalius pfeifferi carpenteri</i> | Species | BOLD:ACB7312 | 7  |
| SSEO1479-16  | <i>Omphalius pfeifferi carpenteri</i> |         |              |    |
| SSEO546-16   | <i>Paphia euglypta</i>                | Species | BOLD:AAX2585 | 2  |
| QWEAS1218-15 | <i>Paphia papilionacea</i>            | Species | BOLD:AAO8674 | 34 |
| QWEAS1223-15 | <i>Paphia papilionacea</i>            |         |              |    |
| QWEAS1117-15 | <i>Paphia papilionacea</i>            |         |              |    |

|              |                            |         |              |    |
|--------------|----------------------------|---------|--------------|----|
| QWEAS1118-15 | <i>Paphia papilionacea</i> |         |              |    |
| QWEAS1115-15 | <i>Paphia papilionacea</i> |         |              |    |
| QWEAS1222-15 | <i>Paphia papilionacea</i> |         |              |    |
| QWEAS1221-15 | <i>Paphia papilionacea</i> |         |              |    |
| QWEAS1113-15 | <i>Paphia papilionacea</i> |         |              |    |
| QWEAS1456-15 | <i>Paphia papilionacea</i> |         |              |    |
| QWEAS1457-15 | <i>Paphia papilionacea</i> |         |              |    |
| QWEAS1220-15 | <i>Paphia papilionacea</i> |         |              |    |
| QWEAS1116-15 | <i>Paphia papilionacea</i> |         |              |    |
| QWEAS1114-15 | <i>Paphia papilionacea</i> |         |              |    |
| QWEAS1219-15 | <i>Paphia papilionacea</i> |         |              |    |
| QWEAS1138-15 | <i>Paphia semirugata</i>   |         |              |    |
| QWEAS1497-15 | <i>Paphia semirugata</i>   | Species | BOLD:AAO8677 | 10 |
| QWEAS1140-15 | <i>Paphia semirugata</i>   |         |              |    |
| QWEAS1139-15 | <i>Paphia semirugata</i>   | Species | BOLD:AAO8678 | 3  |
| QWEAS1389-15 | <i>Paphia sinuosa</i>      | Species | BOLD:ABA7706 | 3  |
| QWEAS1106-15 | <i>Paphia sinuosa</i>      | Species | BOLD:AAO8671 | 3  |
| QWEAS1227-15 | <i>Paphia undulata</i>     |         |              |    |
| QWEAS1225-15 | <i>Paphia undulata</i>     |         |              |    |
| QWEAS1122-15 | <i>Paphia undulata</i>     |         |              |    |
| QWEAS1123-15 | <i>Paphia undulata</i>     |         |              |    |
| QWEAS1121-15 | <i>Paphia undulata</i>     | Species | BOLD:AAO8675 | 27 |
| QWEAS1467-15 | <i>Paphia undulata</i>     |         |              |    |
| QWEAS1119-15 | <i>Paphia undulata</i>     |         |              |    |
| QWEAS1224-15 | <i>Paphia undulata</i>     |         |              |    |
| QWEAS1226-15 | <i>Paphia undulata</i>     |         |              |    |

|              |                              |         |              |    |
|--------------|------------------------------|---------|--------------|----|
| QWEAS1120-15 | <i>Paphia undulata</i>       |         |              |    |
| SSE0545-16   | <i>Paphia vernicosa</i>      | Species | BOLD:AAX2573 | 2  |
| QWEAS1575-15 | <i>Paraoncidium reevesii</i> |         |              |    |
| QWEAS1572-15 | <i>Paraoncidium reevesii</i> |         |              |    |
| QWEAS1570-15 | <i>Paraoncidium reevesii</i> |         |              |    |
| QWEAS1574-15 | <i>Paraoncidium reevesii</i> | Species | BOLD:AAM2279 | 31 |
| QWEAS1576-15 | <i>Paraoncidium reevesii</i> |         |              |    |
| QWEAS1573-15 | <i>Paraoncidium reevesii</i> |         |              |    |
| QWEAS1571-15 | <i>Paraoncidium reevesii</i> |         |              |    |
| SSE0621-16   | <i>Patelloida conulus</i>    |         |              |    |
| SSE01289-16  | <i>Patelloida conulus</i>    |         |              |    |
| SSE01291-16  | <i>Patelloida conulus</i>    |         |              |    |
| SSE01295-16  | <i>Patelloida conulus</i>    |         |              |    |
| SSE01287-16  | <i>Patelloida conulus</i>    |         |              |    |
| SSE01299-16  | <i>Patelloida conulus</i>    |         |              |    |
| SSE0624-16   | <i>Patelloida conulus</i>    |         |              |    |
| SSE0620-16   | <i>Patelloida conulus</i>    |         |              |    |
| SSE01297-16  | <i>Patelloida conulus</i>    | Species | BOLD:AAB2536 | 54 |
| SSE01293-16  | <i>Patelloida conulus</i>    |         |              |    |
| SSE0622-16   | <i>Patelloida conulus</i>    |         |              |    |
| SSE01296-16  | <i>Patelloida conulus</i>    |         |              |    |
| SSE01288-16  | <i>Patelloida conulus</i>    |         |              |    |
| SSE01292-16  | <i>Patelloida conulus</i>    |         |              |    |
| SSE01301-16  | <i>Patelloida conulus</i>    |         |              |    |
| SSE01298-16  | <i>Patelloida conulus</i>    |         |              |    |
| SSE01294-16  | <i>Patelloida conulus</i>    |         |              |    |

|             |                    |         |              |    |
|-------------|--------------------|---------|--------------|----|
| SSEO1312-16 | Patelloida conulus |         |              |    |
| SSEO615-16  | Patelloida conulus |         |              |    |
| SSEO616-16  | Patelloida conulus |         |              |    |
| SSEO1300-16 | Patelloida conulus |         |              |    |
| SSEO618-16  | Patelloida conulus |         |              |    |
| SSEO619-16  | Patelloida conulus |         |              |    |
| SSEO614-16  | Patelloida conulus |         |              |    |
| SSEO617-16  | Patelloida conulus |         |              |    |
| SSEO591-16  | Patelloida heroldi | Species | BOLD:AAB4086 | 60 |
| SSEO608-16  | Patelloida heroldi |         |              |    |
| SSEO605-16  | Patelloida heroldi |         |              |    |
| SSEO583-16  | Patelloida heroldi |         |              |    |
| SSEO613-16  | Patelloida heroldi |         |              |    |
| SSEO596-16  | Patelloida heroldi |         |              |    |
| SSEO593-16  | Patelloida heroldi |         |              |    |
| SSEO607-16  | Patelloida heroldi |         |              |    |
| SSEO602-16  | Patelloida heroldi |         |              |    |
| SSEO580-16  | Patelloida heroldi |         |              |    |
| SSEO611-16  | Patelloida heroldi |         |              |    |
| SSEO600-16  | Patelloida heroldi |         |              |    |
| SSEO609-16  | Patelloida heroldi |         |              |    |
| SSEO582-16  | Patelloida heroldi |         |              |    |
| SSEO586-16  | Patelloida heroldi |         |              |    |
| SSEO612-16  | Patelloida heroldi |         |              |    |
| SSEO589-16  | Patelloida heroldi |         |              |    |
| SSEO585-16  | Patelloida heroldi |         |              |    |

|             |                        |         |              |    |
|-------------|------------------------|---------|--------------|----|
| SSE0584-16  | Patelloida heroldi     |         |              |    |
| SSE0587-16  | Patelloida heroldi     |         |              |    |
| SSE0610-16  | Patelloida heroldi     |         |              |    |
| SSE0581-16  | Patelloida heroldi     |         |              |    |
| SSE0559-16  | Patelloida lentiginosa | Species | BOLD:AAX1753 | 2  |
| SSE01349-16 | Patelloida pygmaea     | Species | BOLD:AAB1669 | 54 |
| SSE01304-16 | Patelloida pygmaea     |         |              |    |
| SSE01339-16 | Patelloida pygmaea     |         |              |    |
| SSE01329-16 | Patelloida pygmaea     |         |              |    |
| SSE01316-16 | Patelloida pygmaea     |         |              |    |
| SSE01337-16 | Patelloida pygmaea     |         |              |    |
| SSE01346-16 | Patelloida pygmaea     |         |              |    |
| SSE01342-16 | Patelloida pygmaea     |         |              |    |
| SSE01303-16 | Patelloida pygmaea     |         |              |    |
| SSE01358-16 | Patelloida pygmaea     |         |              |    |
| SSE01361-16 | Patelloida pygmaea     |         |              |    |
| SSE01363-16 | Patelloida pygmaea     |         |              |    |
| SSE01331-16 | Patelloida pygmaea     |         |              |    |
| SSE01348-16 | Patelloida pygmaea     |         |              |    |
| SSE01245-16 | Patelloida pygmaea     |         |              |    |
| SSE01353-16 | Patelloida pygmaea     |         |              |    |
| SSE01347-16 | Patelloida pygmaea     |         |              |    |
| SSE01362-16 | Patelloida pygmaea     |         |              |    |
| SSE01302-16 | Patelloida pygmaea     |         |              |    |
| SSE01351-16 | Patelloida pygmaea     |         |              |    |
| SSE01359-16 | Patelloida pygmaea     |         |              |    |



|              |                        |         |              |    |
|--------------|------------------------|---------|--------------|----|
| SSEO1345-16  | Patelloida pygmaea     |         |              |    |
| SSEO1360-16  | Patelloida pygmaea     |         |              |    |
| SSEO1343-16  | Patelloida pygmaea     |         |              |    |
| SSEO1246-16  | Patelloida pygmaea     |         |              |    |
| QWEAS1537-15 | Patelloida ryukyuensis | Species | BOLD:AAC5240 | 22 |
| QWEAS1536-15 | Patelloida ryukyuensis |         |              |    |
| QWEAS421-15  | Patelloida ryukyuensis |         |              |    |
| QWEAS425-15  | Patelloida ryukyuensis |         |              |    |
| QWEAS420-15  | Patelloida ryukyuensis |         |              |    |
| QWEAS426-15  | Patelloida ryukyuensis |         |              |    |
| QWEAS423-15  | Patelloida ryukyuensis |         |              |    |
| QWEAS424-15  | Patelloida ryukyuensis |         |              |    |
| QWEAS422-15  | Patelloida ryukyuensis |         |              |    |
| QWEAS427-15  | Patelloida ryukyuensis |         |              |    |
| SSEO570-16   | Patelloida signata     | Species | BOLD:ACY9919 | 2  |
| QWEAS1208-15 | Periglypta chemnitzii  | Species | BOLD:AAO8666 | 14 |
| QWEAS1499-15 | Periglypta chemnitzii  |         |              |    |
| QWEAS1205-15 | Periglypta chemnitzii  |         |              |    |
| QWEAS1207-15 | Periglypta chemnitzii  |         |              |    |
| QWEAS1206-15 | Periglypta chemnitzii  |         |              |    |
| QWEAS054-15  | Perna viridis          | Species | BOLD:ACY1487 | 73 |
| QWEAS051-15  | Perna viridis          |         |              |    |
| QWEAS046-15  | Perna viridis          |         |              |    |
| QWEAS052-15  | Perna viridis          |         |              |    |
| QWEAS050-15  | Perna viridis          |         |              |    |
| QWEAS047-15  | Perna viridis          |         |              |    |

|              |                             |         |              |    |
|--------------|-----------------------------|---------|--------------|----|
| QWEAS048-15  | <i>Perna viridis</i>        |         |              |    |
| QWEAS049-15  | <i>Perna viridis</i>        |         |              |    |
| QWEAS053-15  | <i>Perna viridis</i>        |         |              |    |
| QWEAS528-15  | <i>Phalium bisulcatum</i>   | Species | BOLD:ACB7934 | 2  |
| QWEAS529-15  | <i>Phalium flammiferum</i>  | Species | BOLD:ACB7935 | 2  |
| SSEO1319-16  | <i>Phasianella solida</i>   | Species | BOLD:AAI4608 | 4  |
| SSEO1320-16  | <i>Phasianella solida</i>   |         |              |    |
| QWEAS097-15  | <i>Pholas orientalis</i>    | Species | BOLD:ACH8007 | 6  |
| QWEAS098-15  | <i>Pholas orientalis</i>    |         |              |    |
| QWEAS239-15  | <i>Phos senticosus</i>      | Species | BOLD:ACX3677 | 4  |
| QWEAS241-15  | <i>Phos senticosus</i>      |         |              |    |
| QWEAS242-15  | <i>Phos senticosus</i>      |         |              |    |
| QWEAS240-15  | <i>Phos senticosus</i>      |         |              |    |
| QWEAS839-15  | <i>Pinctada maxima</i>      | Species | BOLD:ACB3526 | 51 |
| QWEAS1082-15 | <i>Pitar japonicum</i>      | Species | BOLD:ACH3330 | 3  |
| SSEO1330-16  | <i>Pomaulax japonicus</i>   | Species | BOLD:AAH7899 | 4  |
| SSEO1328-16  | <i>Pomaulax japonicus</i>   |         |              |    |
| SSEO380-16   | <i>Protaeolidiella atra</i> | Species | BOLD:ACV6117 | 4  |
| SSEO378-16   | <i>Protaeolidiella atra</i> |         |              |    |
| QWEAS1502-15 | <i>Protothaca jedoensis</i> | Species | BOLD:AAO5902 | 19 |
| QWEAS1501-15 | <i>Protothaca jedoensis</i> |         |              |    |
| QWEAS945-15  | <i>Protothaca jedoensis</i> |         |              |    |
| QWEAS944-15  | <i>Protothaca jedoensis</i> |         |              |    |
| QWEAS940-15  | <i>Protothaca jedoensis</i> |         |              |    |
| QWEAS942-15  | <i>Protothaca jedoensis</i> |         |              |    |
| QWEAS943-15  | <i>Protothaca jedoensis</i> |         |              |    |

|              |                                    |         |              |    |
|--------------|------------------------------------|---------|--------------|----|
| QWEAS1300-15 | <i>Psammotaea elongata</i>         | Species | BOLD:ACQ2021 | 11 |
| QWEAS1298-15 | <i>Psammotaea elongata</i>         |         |              |    |
| QWEAS1303-15 | <i>Psammotaea elongata</i>         |         |              |    |
| QWEAS1302-15 | <i>Psammotaea elongata</i>         |         |              |    |
| QWEAS1295-15 | <i>Pseudocardium sachalinense</i>  | Species | BOLD:ACX7097 | 2  |
| QWEAS1296-15 | <i>Pseudocardium sachalinense</i>  | Species | BOLD:ACI1599 | 2  |
| SSEO790-16   | <i>Pseudostomatella decolorata</i> | Species | BOLD:ACB7465 | 4  |
| SSEO791-16   | <i>Pseudostomatella decolorata</i> |         |              |    |
| QWEAS863-15  | <i>Pteria</i> sp.                  | Species | BOLD:ACX5542 | 3  |
| QWEAS864-15  | <i>Pteria</i> sp.                  |         |              |    |
| QWEAS862-15  | <i>Pteria</i> sp.                  |         |              |    |
| SSEO1115-16  | <i>Rapana bezoar</i>               | Species | BOLD:ABV4540 | 38 |
| QWEAS336-15  | <i>Rapana bezoar</i>               |         |              |    |
| QWEAS335-15  | <i>Rapana bezoar</i>               |         |              |    |
| QWEAS338-15  | <i>Rapana bezoar</i>               |         |              |    |
| QWEAS337-15  | <i>Rapana bezoar</i>               |         |              |    |
| QWEAS339-15  | <i>Rapana bezoar</i>               |         |              |    |
| SSEO285-16   | <i>Roboastra luteolineata</i>      | Species | BOLD:AAI0870 | 3  |
| SSEO789-16   | <i>Rossiteria nuclea</i>           | Species | BOLD:ACB7424 | 2  |
| SSEO845-16   | <i>Sagamilepeta sagamiensis</i>    | Species | BOLD:ACB7707 | 4  |
| SSEO844-16   | <i>Sagamilepeta sagamiensis</i>    |         |              |    |
| QWEAS572-15  | <i>Sanguinolaria tchangsii</i>     | Species | BOLD:ACQ7492 | 5  |
| QWEAS570-15  | <i>Sanguinolaria tchangsii</i>     |         |              |    |
| QWEAS1438-15 | <i>Saxidomus purpuratus</i>        | Species | BOLD:AAI0674 | 46 |
| QWEAS1440-15 | <i>Saxidomus purpuratus</i>        |         |              |    |
| QWEAS1439-15 | <i>Saxidomus purpuratus</i>        |         |              |    |

|              |                                   |         |              |    |
|--------------|-----------------------------------|---------|--------------|----|
| QWEAS1441-15 | <i>Saxidomus purpuratus</i>       |         |              |    |
| QWEAS921-15  | <i>Saxidomus purpuratus</i>       |         |              |    |
| QWEAS919-15  | <i>Saxidomus purpuratus</i>       |         |              |    |
| QWEAS922-15  | <i>Saxidomus purpuratus</i>       |         |              |    |
| QWEAS916-15  | <i>Saxidomus purpuratus</i>       |         |              |    |
| QWEAS918-15  | <i>Saxidomus purpuratus</i>       |         |              |    |
| QWEAS920-15  | <i>Saxidomus purpuratus</i>       |         |              |    |
| QWEAS917-15  | <i>Saxidomus purpuratus</i>       |         |              |    |
| SSEO737-16   | <i>Scapharca broughtonii</i>      | Species | BOLD:AAA3571 | 26 |
| SSEO735-16   | <i>Scapharca broughtonii</i>      |         |              |    |
| SSEO766-16   | <i>Scapharca globosa</i>          | Species | BOLD:AAR4118 | 2  |
| SSEO734-16   | <i>Scapharca satowi</i>           | Species | BOLD:AAI0660 | 2  |
| SSEO999-16   | <i>Scutellastra flexuosa</i>      | Species | BOLD:AAH9728 | 2  |
| SSEO987-16   | <i>Scutellastra optima</i>        | Species | BOLD:AAJ5791 | 2  |
| SSEO029-15   | <i>Semele cf. amabilis</i> ZY2012 | Species | BOLD:ACQ8415 | 3  |
| QWEAS585-15  | <i>Semele scabra</i>              | Species | BOLD:ACD2399 | 8  |
| QWEAS584-15  | <i>Semele scabra</i>              |         |              |    |
| QWEAS148-15  | <i>Sepia aculeata</i>             |         |              |    |
| QWEAS149-15  | <i>Sepia aculeata</i>             | Species | BOLD:AAH9790 | 14 |
| QWEAS146-15  | <i>Sepia aculeata</i>             |         |              |    |
| QWEAS147-15  | <i>Sepia aculeata</i>             |         |              |    |
| SSEO060-16   | <i>Sepia andreana</i>             | Species | BOLD:ABZ4460 | 2  |
| SSEO059-16   | <i>Sepia aureomaculata</i>        | Species | BOLD:AAJ7621 | 2  |
| SSEO061-16   | <i>Sepia esculenta</i>            | Species | BOLD:AAE9621 | 2  |
| SSEO189-16   | <i>Sepia kobeensis</i>            | Species | BOLD:AAJ7651 | 2  |
| SSEO063-16   | <i>Sepia latimanus</i>            | Species | BOLD:AAF0784 | 6  |

|             |                              |         |              |    |
|-------------|------------------------------|---------|--------------|----|
| SSEO186-16  | <i>Sepia lycidas</i>         |         |              |    |
| QWEAS158-15 | <i>Sepia lycidas</i>         | Species | BOLD:ABA8975 | 9  |
| SSEO185-16  | <i>Sepia lycidas</i>         |         |              |    |
| SSEO193-16  | <i>Sepia madokai</i>         | Species | BOLD:AAH9804 | 2  |
| SSEO188-16  | <i>Sepia pardex</i>          | Species | BOLD:AAJ7638 | 2  |
| SSEO187-16  | <i>Sepia peterseni</i>       | Species | BOLD:ABZ4217 | 2  |
| QWEAS163-15 | <i>Sepia pharaonis</i>       | Species | BOLD:AAH9805 | 28 |
| QWEAS160-15 | <i>Sepia pharaonis</i>       |         |              |    |
| QWEAS165-15 | <i>Sepia pharaonis</i>       |         |              |    |
| QWEAS161-15 | <i>Sepia pharaonis</i>       |         |              |    |
| QWEAS162-15 | <i>Sepia pharaonis</i>       |         |              |    |
| QWEAS159-15 | <i>Sepia pharaonis</i>       |         |              |    |
| QWEAS164-15 | <i>Sepia pharaonis</i>       |         |              |    |
| QWEAS167-15 | <i>Sepia recurvirostra</i>   | Species | BOLD:AAH9802 | 9  |
| QWEAS166-15 | <i>Sepia recurvirostra</i>   |         |              |    |
| QWEAS168-15 | <i>Sepia recurvirostra</i>   |         |              |    |
| SSEO191-16  | <i>Sepia tokioensis</i>      | Species | BOLD:AAJ7615 | 2  |
| QWEAS172-15 | <i>Sepiella inermis</i>      | Species | BOLD:AAO2726 | 7  |
| QWEAS173-15 | <i>Sepiella inermis</i>      |         |              |    |
| QWEAS176-15 | <i>Sepiola birostrata</i>    | Species | BOLD:AAJ0424 | 11 |
| QWEAS175-15 | <i>Sepiola birostrata</i>    |         |              |    |
| QWEAS178-15 | <i>Sepiola birostrata</i>    |         |              |    |
| QWEAS177-15 | <i>Sepiola birostrata</i>    |         |              |    |
| QWEAS179-15 | <i>Sepiola birostrata</i>    |         |              |    |
| SSEO303-16  | <i>Sepiolina nipponensis</i> | Species | BOLD:AAJ7587 | 3  |
| SSEO304-16  | <i>Sepiolina petasa</i>      | Species | BOLD:ACH2726 | 2  |

|             |                         |         |              |     |
|-------------|-------------------------|---------|--------------|-----|
| SSEO542-16  | Serratina capsoides     | Species | BOLD:ACQ0043 | 6   |
| SSEO544-16  | Serratina capsoides     |         |              |     |
| SSEO540-16  | Serratina capsoides     |         |              |     |
| QWEAS576-15 | Serratina capsoides     |         |              |     |
| QWEAS575-15 | Serratina capsoides     | Species | BOLD:ACQ2803 | 6   |
| QWEAS612-15 | Siliqua radiata         |         |              |     |
| QWEAS611-15 | Siliqua radiata         |         |              |     |
| QWEAS613-15 | Siliqua radiata         | Species | BOLD:ACQ0765 | 2   |
| QWEAS614-15 | Siliqua radiata         |         |              |     |
| SSEO1517-16 | Sinonovacula constricta | Species | BOLD:AAA2942 | 111 |
| SSEO1516-16 | Sinonovacula constricta |         |              |     |
| QWEAS599-15 | Sinonovacula constricta |         |              |     |
| QWEAS598-15 | Sinonovacula constricta |         |              |     |
| QWEAS602-15 | Sinonovacula constricta |         |              |     |
| QWEAS601-15 | Sinonovacula constricta |         |              |     |
| QWEAS600-15 | Sinonovacula constricta |         |              |     |
| QWEAS597-15 | Sinonovacula constricta |         |              |     |
| SSEO780-16  | Solariella nyssonus     | Species | BOLD:ACQ3687 | 4   |
| SSEO781-16  | Solariella nyssonus     |         |              |     |
| QWEAS594-15 | Solecrtus divaricatus   | Species | BOLD:ACQ0166 | 2   |
| QWEAS621-15 | Solen grandis           | Species | BOLD:ACQ3781 | 6   |
| QWEAS620-15 | Solen grandis           |         |              |     |
| QWEAS619-15 | Solen grandis           | Species | BOLD:ACQ3780 | 2   |
| QWEAS615-15 | Solen strictus          | Species | BOLD:ACQ5937 | 6   |
| QWEAS616-15 | Solen strictus          |         |              |     |
| QWEAS617-15 | Solen strictus          |         |              |     |

|              |                              |         |              |    |
|--------------|------------------------------|---------|--------------|----|
| QWEAS618-15  | <i>Solen strictus</i>        | Species | BOLD:ACH5588 | 6  |
| QWEAS1304-15 | <i>Soletellina virescens</i> | Species | BOLD:ACQ3739 | 4  |
| SSEO159-16   | <i>Stiliger ornatus</i>      | Species | BOLD:ACQ5939 | 2  |
| SSEO160-16   | <i>Stiliger smaragdinus</i>  | Species | BOLD:ACQ5940 | 2  |
| SSEO878-16   | <i>Stomatella impertusa</i>  | Species | BOLD:ACB7427 | 2  |
| SSEO876-16   | <i>Stomatella planulata</i>  |         |              |    |
| SSEO874-16   | <i>Stomatella planulata</i>  | Species | BOLD:AAF3287 | 6  |
| SSEO875-16   | <i>Stomatella planulata</i>  |         |              |    |
| SSEO877-16   | <i>Stomatella planulata</i>  | Species | BOLD:ACY9511 | 2  |
| SSEO788-16   | <i>Stomatia obscura</i>      | Species | BOLD:ACB7092 | 2  |
| SSEO787-16   | <i>Stomatia phymotis</i>     | Species | BOLD:AAJ4162 | 2  |
| QWEAS512-15  | <i>Strombus luhuanus</i>     |         |              |    |
| QWEAS513-15  | <i>Strombus luhuanus</i>     | Species | BOLD:AAH9999 | 12 |
| QWEAS511-15  | <i>Strombus luhuanus</i>     |         |              |    |
| QWEAS514-15  | <i>Strombus luhuanus</i>     |         |              |    |
| QWEAS496-15  | <i>Strombus urceus</i>       |         |              |    |
| QWEAS494-15  | <i>Strombus urceus</i>       | Species | BOLD:ACB6979 | 6  |
| QWEAS495-15  | <i>Strombus urceus</i>       |         |              |    |
| QWEAS502-15  | <i>Strombus vittatus</i>     | Species | BOLD:ACX3385 | 2  |
| QWEAS504-15  | <i>Strombus vittatus</i>     | Species | BOLD:ACB8333 | 4  |
| QWEAS503-15  | <i>Strombus vittatus</i>     |         |              |    |
| QWEAS1505-15 | <i>Sunetta menstrualis</i>   |         |              |    |
| QWEAS1504-15 | <i>Sunetta menstrualis</i>   | Species | BOLD:AAO8014 | 16 |
| QWEAS1091-15 | <i>Sunetta menstrualis</i>   |         |              |    |
| QWEAS1089-15 | <i>Sunetta menstrualis</i>   |         |              |    |
| QWEAS1090-15 | <i>Sunetta menstrualis</i>   |         |              |    |

|              |                     |         |              |    |
|--------------|---------------------|---------|--------------|----|
| QWEAS1088-15 | Sunetta menstrualis |         |              |    |
| SSEO375-16   | Tambja amakusana    | Species | BOLD:AAK0292 | 2  |
| SSEO376-16   | Tambja limaciformis | Species | BOLD:AAK0293 | 2  |
| SSEO292-16   | Tambja sagamiana    | Species | BOLD:AAK0295 | 2  |
| QWEAS1461-15 | Tapes dorsatus      | Species | BOLD:AAK0248 | 28 |
| QWEAS1460-15 | Tapes dorsatus      |         |              |    |
| QWEAS1257-15 | Tapes dorsatus      |         |              |    |
| QWEAS1102-15 | Tapes dorsatus      |         |              |    |
| QWEAS1104-15 | Tapes dorsatus      |         |              |    |
| QWEAS1101-15 | Tapes dorsatus      |         |              |    |
| QWEAS1103-15 | Tapes dorsatus      |         |              |    |
| QWEAS1105-15 | Tapes dorsatus      |         |              |    |
| QWEAS1100-15 | Tapes dorsatus      |         |              |    |
| QWEAS1099-15 | Tapes dorsatus      |         |              |    |
| QWEAS1096-15 | Tapes literata      | Species | BOLD:AAO8786 | 31 |
| QWEAS1095-15 | Tapes literata      |         |              |    |
| QWEAS1094-15 | Tapes literata      |         |              |    |
| QWEAS1258-15 | Tapes literata      |         |              |    |
| QWEAS1259-15 | Tapes literata      |         |              |    |
| QWEAS1462-15 | Tapes literata      |         |              |    |
| QWEAS1463-15 | Tapes literata      |         |              |    |
| QWEAS1092-15 | Tapes literata      |         |              |    |
| QWEAS1093-15 | Tapes literata      |         |              |    |
| QWEAS1098-15 | Tapes literata      |         |              |    |
| QWEAS1260-15 | Tapes literata      |         |              |    |
| QWEAS1097-15 | Tapes literata      |         |              |    |



|              |                      |         |              |    |
|--------------|----------------------|---------|--------------|----|
| SSEO1012-16  | Tectarius spinulosus | Species | BOLD:ACY9257 | 2  |
| SSEO1013-16  | Tectarius spinulosus | Species | BOLD:AAK0770 | 2  |
| SSEO1264-16  | Terebralia sulcata   | Species | BOLD:ACQ3189 | 11 |
| SSEO1258-16  | Terebralia sulcata   |         |              |    |
| SSEO1259-16  | Terebralia sulcata   |         |              |    |
| SSEO1257-16  | Terebralia sulcata   |         |              |    |
| QWEAS1618-15 | Terebralia sulcata   |         |              |    |
| QWEAS352-15  | Thais gradata        | Species | BOLD:ACB7121 | 8  |
| QWEAS353-15  | Thais gradata        |         |              |    |
| SSEO157-16   | Thuridilla gracilis  | Species | BOLD:AAZ8673 | 3  |
| SSEO158-16   | Thuridilla splendens | Species | BOLD:ACH9448 | 2  |
| QWEAS568-15  | Tonna dolium         | Species | BOLD:ACB8732 | 4  |
| QWEAS569-15  | Tonna dolium         |         |              |    |
| QWEAS565-15  | Tonna galea          | Species | BOLD:ACB8731 | 4  |
| QWEAS566-15  | Tonna galea          |         |              |    |
| QWEAS567-15  | Tonna sulcosa        | Species | BOLD:ACB8314 | 2  |
| SSEO819-16   | Trochus histrio      | Species | BOLD:ACB7109 | 2  |
| SSEO816-16   | Trochus maculatus    | Species | BOLD:AAH8276 | 7  |
| SSEO817-16   | Trochus maculatus    |         |              |    |
| SSEO815-16   | Trochus maculatus    |         |              |    |
| SSEO818-16   | Trochus stellatus    | Species | BOLD:AAW7874 | 2  |
| SSEO1336-16  | Turbo chrysostomus   | Species | BOLD:ACY9409 | 2  |
| SSEO1341-16  | Turbo marmoratus     | Species | BOLD:AAF6524 | 5  |
| SSEO1340-16  | Turbo marmoratus     |         |              |    |

|              |                       |         |              |    |
|--------------|-----------------------|---------|--------------|----|
| SSEO1332-16  | Turbo petholatus      | Species | BOLD:AAD9725 | 4  |
| SSEO1352-16  | Turbo reevii          | Species | BOLD:AAH7669 | 3  |
| SSEO1335-16  | Turbo setosus         | Species | BOLD:AAD9686 | 3  |
| SSEO1334-16  | Turbo stenogyrus      | Species | BOLD:AAH7676 | 4  |
| SSEO1333-16  | Turbo stenogyrus      |         |              |    |
| QWEAS327-15  | Turricula javana      | Species | BOLD:ACV8315 | 3  |
| SSEO814-16   | Umbonium giganteum    | Species | BOLD:ACB7064 | 4  |
| SSEO812-16   | Umbonium giganteum    |         |              |    |
| SSEO811-16   | Umbonium moniliferum  | Species | BOLD:AAW8352 | 4  |
| SSEO813-16   | Umbonium moniliferum  |         |              |    |
| QWEAS1367-15 | Uroteuthis chinensis  | Species | BOLD:AAB5881 | 30 |
| QWEAS1366-15 | Uroteuthis chinensis  |         |              |    |
| QWEAS1368-15 | Uroteuthis chinensis  |         |              |    |
| QWEAS1365-15 | Uroteuthis chinensis  |         |              |    |
| QWEAS1364-15 | Uroteuthis chinensis  |         |              |    |
| QWEAS1363-15 | Uroteuthis chinensis  |         |              |    |
| QWEAS139-15  | Uroteuthis chinensis  |         |              |    |
| QWEAS1357-15 | Uroteuthis duvaucelii | Species | BOLD:AAE3352 | 32 |
| QWEAS1355-15 | Uroteuthis duvaucelii |         |              |    |
| QWEAS1356-15 | Uroteuthis duvaucelii |         |              |    |
| QWEAS137-15  | Uroteuthis duvaucelii |         |              |    |
| QWEAS132-15  | Uroteuthis duvaucelii |         |              |    |
| QWEAS134-15  | Uroteuthis duvaucelii |         |              |    |
| QWEAS133-15  | Uroteuthis duvaucelii |         |              |    |

|              |                         |         |              |    |
|--------------|-------------------------|---------|--------------|----|
| QWEAS131-15  | Uroteuthis duvaucelii   |         |              |    |
| QWEAS135-15  | Uroteuthis duvaucelii   |         |              |    |
| QWEAS136-15  | Uroteuthis duvaucelii   |         |              |    |
| SSEO050-16   | Uroteuthis edulis       | Species | BOLD:AAB8873 | 44 |
| SSEO054-16   | Uroteuthis edulis       |         |              |    |
| SSEO046-16   | Uroteuthis edulis       |         |              |    |
| SSEO040-16   | Uroteuthis edulis       |         |              |    |
| SSEO052-16   | Uroteuthis edulis       |         |              |    |
| SSEO042-16   | Uroteuthis edulis       |         |              |    |
| SSEO053-16   | Uroteuthis edulis       |         |              |    |
| SSEO051-16   | Uroteuthis edulis       |         |              |    |
| SSEO055-16   | Uroteuthis edulis       |         |              |    |
| SSEO043-16   | Uroteuthis edulis       |         |              |    |
| SSEO047-16   | Uroteuthis edulis       |         |              |    |
| SSEO049-16   | Uroteuthis edulis       |         |              |    |
| SSEO048-16   | Uroteuthis edulis       |         |              |    |
| SSEO044-16   | Uroteuthis edulis       |         |              |    |
| SSEO045-16   | Uroteuthis edulis       |         |              |    |
| SSEO041-16   | Uroteuthis edulis       |         |              |    |
| QWEAS1358-15 | Uroteuthis edulis       |         |              |    |
| QWEAS1362-15 | Uroteuthis edulis       |         |              |    |
| QWEAS1360-15 | Uroteuthis edulis       |         |              |    |
| QWEAS1361-15 | Uroteuthis edulis       |         |              |    |
| QWEAS1359-15 | Uroteuthis edulis       |         |              |    |
| QWEAS1558-15 | Varicinassa variciferus | Species | BOLD:ACB8189 | 44 |
| QWEAS1559-15 | Varicinassa variciferus |         |              |    |

|              |                         |         |              |   |
|--------------|-------------------------|---------|--------------|---|
| QWEAS1555-15 | Varicinassa variciferus |         |              |   |
| QWEAS1560-15 | Varicinassa variciferus |         |              |   |
| QWEAS1557-15 | Varicinassa variciferus |         |              |   |
| QWEAS1556-15 | Varicinassa variciferus |         |              |   |
| QWEAS630-15  | Vasticardium flavum     | Species | BOLD:ACX4007 | 2 |
| QWEAS625-15  | Vasticardium flavum     | Species | BOLD:ACQ2883 | 8 |
| QWEAS628-15  | Vasticardium flavum     |         |              |   |
| QWEAS627-15  | Vasticardium flavum     |         |              |   |
| QWEAS626-15  | Vasticardium flavum     |         |              |   |
| QWEAS629-15  | Vasticardium flavum     | Species | BOLD:ACQ2882 | 2 |
| QWEAS1321-15 | Vasum turbinellus       | Species | BOLD:ACX7608 | 2 |
| QWEAS1320-15 | Vasum turbinellus       |         |              |   |
| QWEAS623-15  | Vepricardium coronatum  | Species | BOLD:ACQ0321 | 8 |
| QWEAS624-15  | Vepricardium coronatum  |         |              |   |
| QWEAS622-15  | Vepricardium coronatum  |         |              |   |

**Supplementary Table 5.** BINs with taxonomic discordance.

| Process ID   | Identification                 | Rank of Conflict | BIN          |
|--------------|--------------------------------|------------------|--------------|
| SSEO406-16   | <i>Herpetopoma pauperculus</i> | Species          | BOLD:ACY9302 |
| QWEAS1319-15 | <i>Moerella iridescens</i>     | Species          | BOLD:ACX7266 |
| SSEO573-16   | <i>Patelloida striata</i>      | Species          | BOLD:ACY9706 |
| QWEAS865-15  | <i>Pteria loveni</i>           | Species          | BOLD:ACX5453 |
| QWEAS328-15  | <i>Gemmula deshayesii</i>      | Species          | BOLD:ACX3938 |

**Supplementary Table 6.** BINs with Single Specimens.

| Process ID  | Identification      | Conflicting Taxon in BIN        | Rank of Conflict | BIN          | BIN Total Members | BIN Tax Variation                                         |
|-------------|---------------------|---------------------------------|------------------|--------------|-------------------|-----------------------------------------------------------|
| SSEO697-16  | Crassostrea gigas   | Mollusca                        | Phylum           | BOLD:AAB2297 | 103               | Mollusca[104], Arthropoda[2]                              |
| SSEO698-16  | Crassostrea gigas   | Mollusca                        |                  |              |                   |                                                           |
| SSEO696-16  | Crassostrea gigas   | Mollusca                        |                  |              |                   |                                                           |
| QWEAS004-15 | Crassostrea gigas   | Mollusca                        |                  |              |                   |                                                           |
| QWEAS003-15 | Crassostrea gigas   | Mollusca                        |                  |              |                   |                                                           |
| QWEAS006-15 | Crassostrea gigas   | Mollusca                        |                  |              |                   |                                                           |
| QWEAS005-15 | Crassostrea gigas   | Mollusca                        |                  |              |                   |                                                           |
| QWEAS002-15 | Crassostrea gigas   | Mollusca                        |                  |              |                   |                                                           |
| QWEAS001-15 | Crassostrea gigas   | Mollusca                        |                  |              |                   |                                                           |
| SSEO1395-16 | Arca avellana       | Arcoida                         | Order            | BOLD:AAY3811 | 7                 | Veneroida[4], Arcoida[3]                                  |
| SSEO1396-16 | Arca avellana       | Arcoida                         |                  |              |                   |                                                           |
| SSEO1397-16 | Arca avellana       | Arcoida                         |                  |              |                   |                                                           |
| QWEAS483-15 | Clypeomorus humilis | Sorbeoconcha                    | Order            | BOLD:AAO8512 | 13                | Mesogastropoda[12], Sorbeoconcha[1]                       |
| QWEAS469-15 | Planaxis sulcatus   | Mesogastropoda                  |                  |              |                   |                                                           |
| QWEAS473-15 | Planaxis sulcatus   | Mesogastropoda                  |                  |              |                   |                                                           |
| QWEAS471-15 | Planaxis sulcatus   | Mesogastropoda                  |                  |              |                   |                                                           |
| QWEAS468-15 | Planaxis sulcatus   | Mesogastropoda                  |                  |              |                   |                                                           |
| QWEAS470-15 | Planaxis sulcatus   | Mesogastropoda                  |                  |              |                   |                                                           |
| SSEO1262-16 | Lunella coreensis   | Gastropoda_order_incertae_sedis | Order            | BOLD:AAE3868 | 38                | Gastropoda_order_incertae_sedis[36], Archaeogastropoda[1] |
| SSEO1439-16 | Lunella coreensis   | Gastropoda_order_incertae_sedis |                  |              |                   |                                                           |
| SSEO1437-16 | Lunella coreensis   | Gastropoda_order_incertae_sedis |                  |              |                   |                                                           |
| SSEO1269-16 | Lunella coreensis   | Gastropoda_order_incertae_sedis |                  |              |                   |                                                           |

|             |                          |                                     |        |              |     |                                         |
|-------------|--------------------------|-------------------------------------|--------|--------------|-----|-----------------------------------------|
|             |                          | tae_sedis                           |        |              |     |                                         |
| SSEO1263-16 | Lunella coreensis        | Gastropoda_order_incer<br>tae_sedis |        |              |     |                                         |
| SSEO1438-16 | Lunella coreensis        | Gastropoda_order_incer<br>tae_sedis |        |              |     |                                         |
| SSEO1267-16 | Lunella coreensis        | Gastropoda_order_incer<br>tae_sedis |        |              |     |                                         |
| SSEO1268-16 | Lunella coreensis        | Gastropoda_order_incer<br>tae_sedis |        |              |     |                                         |
| SSEO1265-16 | Lunella coreensis        | Gastropoda_order_incer<br>tae_sedis |        |              |     |                                         |
| SSEO1266-16 | Lunella coreensis        | Gastropoda_order_incer<br>tae_sedis |        |              |     |                                         |
| SSEO1283-16 | Lunella moniliformis     | Gastropoda_order_incer<br>tae_sedis |        |              |     |                                         |
| SSEO1285-16 | Lunella moniliformis     | Gastropoda_order_incer<br>tae_sedis |        |              |     |                                         |
| SSEO1284-16 | Lunella moniliformis     | Gastropoda_order_incer<br>tae_sedis |        |              |     |                                         |
| SSEO1125-16 | Morula purpureocincta    | Neogastropoda                       | Order  | BOLD:ACH8830 | 4   | Neogastropoda[3],<br>Littorinimorpha[1] |
| SSEO190-16  | Sepia subtenuipes        | Sepiida                             | Order  | BOLD:AAI3631 | 3   | Sepiida[1], Octopoda[1]                 |
| SSEO1381-16 | Acanthochitona defilippi | Acanthochitonidae                   | Family | BOLD:AAE6153 | 7   | Acanthochitonidae[6],<br>Chitonidae[1]  |
| SSEO1385-16 | Acanthochitona defilippi | Acanthochitonidae                   |        |              |     |                                         |
| SSEO1382-16 | Acanthochitona defilippi | Acanthochitonidae                   |        |              |     |                                         |
| SSEO1383-16 | Acanthochitona defilippi | Acanthochitonidae                   | Family | BOLD:AAE6152 | 7   | Chitonidae[5],<br>Acanthochitonidae[2]  |
| SSEO907-16  | Cellana toreuma          | Nacellidae                          | Family | BOLD:AAI7335 | 532 | Nacellidae[511], Acmaeidae[12]          |
| SSEO1370-16 | Cellana toreuma          | Nacellidae                          |        |              |     |                                         |
| SSEO891-16  | Cellana toreuma          | Nacellidae                          |        |              |     |                                         |

|              |                      |               |        |              |     |                                  |
|--------------|----------------------|---------------|--------|--------------|-----|----------------------------------|
| SSEO909-16   | Cellana toreuma      | Nacellidae    |        |              |     |                                  |
| SSEO888-16   | Cellana toreuma      | Nacellidae    |        |              |     |                                  |
| SSEO1369-16  | Cellana toreuma      | Nacellidae    |        |              |     |                                  |
| SSEO906-16   | Cellana toreuma      | Nacellidae    |        |              |     |                                  |
| SSEO911-16   | Cellana toreuma      | Nacellidae    |        |              |     |                                  |
| SSEO908-16   | Cellana toreuma      | Nacellidae    |        |              |     |                                  |
| SSEO904-16   | Cellana toreuma      | Nacellidae    |        |              |     |                                  |
| SSEO889-16   | Cellana toreuma      | Nacellidae    |        |              |     |                                  |
| SSEO890-16   | Cellana toreuma      | Nacellidae    |        |              |     |                                  |
| SSEO910-16   | Cellana toreuma      | Nacellidae    |        |              |     |                                  |
| SSEO905-16   | Cellana toreuma      | Nacellidae    |        |              |     |                                  |
| QWEAS1328-15 | Cellana toreuma      | Nacellidae    |        |              |     |                                  |
| QWEAS1334-15 | Cellana toreuma      | Nacellidae    |        |              |     |                                  |
| QWEAS1331-15 | Cellana toreuma      | Nacellidae    |        |              |     |                                  |
| QWEAS1335-15 | Cellana toreuma      | Nacellidae    |        |              |     |                                  |
| QWEAS1336-15 | Cellana toreuma      | Nacellidae    |        |              |     |                                  |
| QWEAS1332-15 | Cellana toreuma      | Nacellidae    |        |              |     |                                  |
| QWEAS1330-15 | Cellana toreuma      | Nacellidae    |        |              |     |                                  |
| QWEAS1333-15 | Cellana toreuma      | Nacellidae    |        |              |     |                                  |
| QWEAS1329-15 | Cellana toreuma      | Nacellidae    |        |              |     |                                  |
| SSEO1469-16  | Notoacmea schrenckii | Acmaeidae     |        |              |     |                                  |
| SSEO1473-16  | Notoacmea schrenckii | Acmaeidae     |        |              |     |                                  |
| SSEO1472-16  | Notoacmea schrenckii | Acmaeidae     |        |              |     |                                  |
| SSEO1470-16  | Notoacmea schrenckii | Acmaeidae     |        |              |     |                                  |
| SSEO1468-16  | Notoacmea schrenckii | Acmaeidae     |        |              |     |                                  |
| SSEO1471-16  | Notoacmea schrenckii | Acmaeidae     |        |              |     |                                  |
| QWEAS482-15  | Clypeomorus humilis  | Cerithiidae   | Family | BOLD:ACB8597 | 4   | Cerithiidae[3], Pleuroceridae[1] |
| QWEAS321-15  | Conus aristophanes   | Conidae       | Family | BOLD:AAJ7375 | 7   | Conidae[6], Columbelloidea[1]    |
| QWEAS257-15  | Euplica scripta      | Columbellidae |        |              |     |                                  |
| QWEAS1377-15 | Mactra veneriformis  | Mactridae     | Family | BOLD:AAB4298 | 206 | Mactridae[204], Veneridae[2]     |



|              |                             |           |        |              |    |                             |
|--------------|-----------------------------|-----------|--------|--------------|----|-----------------------------|
| QWEAS1383-15 | <i>Mactra veneriformis</i>  | Mactridae |        |              |    |                             |
| QWEAS1379-15 | <i>Mactra veneriformis</i>  | Mactridae |        |              |    |                             |
| QWEAS1381-15 | <i>Mactra veneriformis</i>  | Mactridae |        |              |    |                             |
| QWEAS1385-15 | <i>Mactra veneriformis</i>  | Mactridae |        |              |    |                             |
| QWEAS1388-15 | <i>Mactra veneriformis</i>  | Mactridae |        |              |    |                             |
| QWEAS1386-15 | <i>Mactra veneriformis</i>  | Mactridae |        |              |    |                             |
| QWEAS1387-15 | <i>Mactra veneriformis</i>  | Mactridae |        |              |    |                             |
| QWEAS1378-15 | <i>Mactra veneriformis</i>  | Mactridae |        |              |    |                             |
| QWEAS1382-15 | <i>Mactra veneriformis</i>  | Mactridae |        |              |    |                             |
| QWEAS1375-15 | <i>Mactra veneriformis</i>  | Mactridae |        |              |    |                             |
| QWEAS1384-15 | <i>Mactra veneriformis</i>  | Mactridae |        |              |    |                             |
| QWEAS1376-15 | <i>Mactra veneriformis</i>  | Mactridae |        |              |    |                             |
| QWEAS1380-15 | <i>Mactra veneriformis</i>  | Mactridae |        |              |    |                             |
| QWEAS1261-15 | <i>Mactra veneriformis</i>  | Mactridae |        |              |    |                             |
| QWEAS1265-15 | <i>Mactra veneriformis</i>  | Mactridae |        |              |    |                             |
| QWEAS1264-15 | <i>Mactra veneriformis</i>  | Mactridae |        |              |    |                             |
| QWEAS1263-15 | <i>Mactra veneriformis</i>  | Mactridae |        |              |    |                             |
| QWEAS1262-15 | <i>Mactra veneriformis</i>  | Mactridae |        |              |    |                             |
| QWEAS1503-15 | <i>Protothaca jedoensis</i> | Veneridae |        |              |    |                             |
| QWEAS1405-15 | <i>Meretrix lusoria</i>     | Veneridae | Family | BOLD:AAC6197 | 87 | Veneridae[82], Mactridae[1] |
| SSEO565-16   | <i>Meretrix lusoria</i>     | Veneridae |        |              |    |                             |
| QWEAS1447-15 | <i>Meretrix meretrix</i>    | Veneridae |        |              |    |                             |
| QWEAS1449-15 | <i>Meretrix meretrix</i>    | Veneridae |        |              |    |                             |
| QWEAS1442-15 | <i>Meretrix meretrix</i>    | Veneridae |        |              |    |                             |
| QWEAS1444-15 | <i>Meretrix meretrix</i>    | Veneridae |        |              |    |                             |
| QWEAS1448-15 | <i>Meretrix meretrix</i>    | Veneridae |        |              |    |                             |
| QWEAS1410-15 | <i>Meretrix petechialis</i> | Veneridae |        |              |    |                             |
| QWEAS1412-15 | <i>Meretrix petechialis</i> | Veneridae |        |              |    |                             |
| QWEAS1042-15 | <i>Meretrix petechialis</i> | Veneridae |        |              |    |                             |
| QWEAS1047-15 | <i>Meretrix petechialis</i> | Veneridae |        |              |    |                             |

|              |                            |              |        |              |     |                                  |
|--------------|----------------------------|--------------|--------|--------------|-----|----------------------------------|
| QWEAS1041-15 | Meretrix petechialis       | Veneridae    |        |              |     |                                  |
| QWEAS1039-15 | Meretrix petechialis       | Veneridae    |        |              |     |                                  |
| QWEAS1040-15 | Meretrix petechialis       | Veneridae    |        |              |     |                                  |
| QWEAS1044-15 | Meretrix petechialis       | Veneridae    |        |              |     |                                  |
| QWEAS1046-15 | Meretrix petechialis       | Veneridae    |        |              |     |                                  |
| QWEAS1045-15 | Meretrix petechialis       | Veneridae    |        |              |     |                                  |
| QWEAS1043-15 | Meretrix petechialis       | Veneridae    |        |              |     |                                  |
| QWEAS251-15  | Neptunea cumingi           | Buccinidae   | Family | BOLD:ACF4243 | 12  | Muricidae[6], Buccinidae[6]      |
| QWEAS252-15  | Neptunea cumingi           | Buccinidae   |        |              |     |                                  |
| QWEAS253-15  | Neptunea cumingi           | Buccinidae   |        |              |     |                                  |
| SSEO1398-16  | Ocenebrellus inornatus     | Muricidae    |        |              |     |                                  |
| SSEO1399-16  | Ocenebrellus inornatus     | Muricidae    |        |              |     |                                  |
| SSEO1400-16  | Ocenebrellus inornatus     | Muricidae    |        |              |     |                                  |
| QWEAS477-15  | Rhinoclavis sinensis       | Cerithiidae  | Family | BOLD:AAA7590 | 7   | Cerithiidae[6], Batillariidae[1] |
| QWEAS478-15  | Rhinoclavis sinensis       | Cerithiidae  |        |              |     |                                  |
| QWEAS479-15  | Rhinoclavis sinensis       | Cerithiidae  |        |              |     |                                  |
| SSEO402-16   | Adipicola iwaotakii        | Adipicola    | Genus  | BOLD:AAA7140 | 103 | Adipicola[109], Idas[1]          |
| SSEO407-16   | Adipicola iwaotakii        | Adipicola    |        |              |     |                                  |
| SSEO399-16   | Adipicola iwaotakii        | Adipicola    |        |              |     |                                  |
| SSEO398-16   | Adipicola iwaotakii        | Adipicola    |        |              |     |                                  |
| SSEO397-16   | Adipicola iwaotakii        | Adipicola    |        |              |     |                                  |
| QWEAS201-15  | Amphioctopus kagoshimensis | Amphioctopus | Genus  | BOLD:ABA8783 | 15  | Amphioctopus[11], Octopus[4]     |
| QWEAS199-15  | Amphioctopus kagoshimensis | Amphioctopus |        |              |     |                                  |
| QWEAS198-15  | Amphioctopus kagoshimensis | Amphioctopus |        |              |     |                                  |
| QWEAS200-15  | Amphioctopus kagoshimensis | Amphioctopus |        |              |     |                                  |
| SSEO248-16   | Amphioctopus kagoshimensis | Amphioctopus |        |              |     |                                  |
| SSEO250-16   | Amphioctopus marginatus    | Amphioctopus | Genus  | BOLD:AAF4331 | 29  | Amphioctopus[19], Octopus[10]    |
| SSEO252-16   | Amphioctopus marginatus    | Amphioctopus |        |              |     |                                  |
| QWEAS202-15  | Amphioctopus marginatus    | Amphioctopus |        |              |     |                                  |
| QWEAS205-15  | Amphioctopus marginatus    | Amphioctopus |        |              |     |                                  |

|             |                                     |                       |       |              |     |                                                                             |
|-------------|-------------------------------------|-----------------------|-------|--------------|-----|-----------------------------------------------------------------------------|
| QWEAS204-15 | <i>Amphioctopus marginatus</i>      | <i>Amphioctopus</i>   |       |              |     |                                                                             |
| QWEAS203-15 | <i>Amphioctopus marginatus</i>      | <i>Amphioctopus</i>   |       |              |     |                                                                             |
| QWEAS208-15 | <i>Amphioctopus ovulum</i>          | <i>Amphioctopus</i>   | Genus | BOLD:AAJ2313 | 19  | <i>Amphioctopus</i> [15], <i>Octopus</i> [4]                                |
| QWEAS206-15 | <i>Amphioctopus ovulum</i>          | <i>Amphioctopus</i>   |       |              |     |                                                                             |
| QWEAS209-15 | <i>Amphioctopus ovulum</i>          | <i>Amphioctopus</i>   |       |              |     |                                                                             |
| QWEAS207-15 | <i>Amphioctopus ovulum</i>          | <i>Amphioctopus</i>   |       |              |     |                                                                             |
| SSEO254-16  | <i>Amphioctopus ovulum</i>          | <i>Amphioctopus</i>   |       |              |     |                                                                             |
| SSEO255-16  | <i>Amphioctopus ovulum</i>          | <i>Amphioctopus</i>   |       |              |     |                                                                             |
| SSEO238-16  | <i>Callistoctopus aspilosomatis</i> | <i>Callistoctopus</i> |       |              |     |                                                                             |
| QWEAS223-15 | <i>Callistoctopus minor</i>         | <i>Callistoctopus</i> | Genus | BOLD:AAI3616 | 33  | <i>Callistoctopus</i> [17], <i>Octopus</i> [13],<br><i>Amphioctopus</i> [1] |
| QWEAS218-15 | <i>Callistoctopus minor</i>         | <i>Callistoctopus</i> |       |              |     |                                                                             |
| QWEAS220-15 | <i>Callistoctopus minor</i>         | <i>Callistoctopus</i> |       |              |     |                                                                             |
| SSEO236-16  | <i>Callistoctopus minor</i>         | <i>Callistoctopus</i> |       |              |     |                                                                             |
| QWEAS219-15 | <i>Callistoctopus minor</i>         | <i>Callistoctopus</i> |       |              |     |                                                                             |
| QWEAS222-15 | <i>Callistoctopus minor</i>         | <i>Callistoctopus</i> |       |              |     |                                                                             |
| QWEAS221-15 | <i>Callistoctopus minor</i>         | <i>Callistoctopus</i> |       |              |     |                                                                             |
| SSEO234-16  | <i>Callistoctopus ornatus</i>       | <i>Callistoctopus</i> | Genus | BOLD:AAI6847 | 5   | <i>Callistoctopus</i> [4],<br><i>Hapalochlaena</i> [1]                      |
| SSEO682-16  | <i>Calyptogena extenta</i>          | <i>Calyptogena</i>    | Genus | BOLD:AAD2536 | 8   | <i>Ectenagena</i> [4], <i>Calyptogena</i> [4]                               |
| SSEO1251-16 | <i>Cerithidea alata</i>             | <i>Cerithidea</i>     | Genus | BOLD:ACH9667 | 22  | <i>Cerithidea</i> [16], <i>Cerithideopsilla</i> [6]                         |
| SSEO1252-16 | <i>Cerithidea alata</i>             | <i>Cerithidea</i>     |       |              |     |                                                                             |
| SSEO1377-16 | <i>Cerithidea alata</i>             | <i>Cerithidea</i>     |       |              |     |                                                                             |
| SSEO1253-16 | <i>Cerithidea alata</i>             | <i>Cerithidea</i>     |       |              |     |                                                                             |
| SSEO1250-16 | <i>Cerithidea alata</i>             | <i>Cerithidea</i>     |       |              |     |                                                                             |
| SSEO1254-16 | <i>Cerithidea alata</i>             | <i>Cerithidea</i>     |       |              |     |                                                                             |
| SSEO1248-16 | <i>Cerithidea alata</i>             | <i>Cerithidea</i>     |       |              |     |                                                                             |
| SSEO1249-16 | <i>Cerithidea alata</i>             | <i>Cerithidea</i>     |       |              |     |                                                                             |
| SSEO1177-16 | <i>Cerithidea cingulata</i>         | <i>Cerithidea</i>     | Genus | BOLD:AAA7612 | 117 | <i>Cerithidea</i> [115], <i>Cerithideopsilla</i> [2]                        |
| SSEO1208-16 | <i>Cerithidea cingulata</i>         | <i>Cerithidea</i>     |       |              |     |                                                                             |
| SSEO1197-16 | <i>Cerithidea cingulata</i>         | <i>Cerithidea</i>     |       |              |     |                                                                             |

|             |                          |            |       |              |    |                                     |
|-------------|--------------------------|------------|-------|--------------|----|-------------------------------------|
| SSEO1198-16 | Cerithidea cingulata     | Cerithidea |       |              |    |                                     |
| SSEO1201-16 | Cerithidea cingulata     | Cerithidea |       |              |    |                                     |
| SSEO1200-16 | Cerithidea cingulata     | Cerithidea |       |              |    |                                     |
| SSEO1203-16 | Cerithidea cingulata     | Cerithidea |       |              |    |                                     |
| SSEO1247-16 | Cerithidea cingulata     | Cerithidea |       |              |    |                                     |
| SSEO1209-16 | Cerithidea cingulata     | Cerithidea |       |              |    |                                     |
| SSEO1214-16 | Cerithidea cingulata     | Cerithidea |       |              |    |                                     |
| SSEO1212-16 | Cerithidea cingulata     | Cerithidea |       |              |    |                                     |
| SSEO1202-16 | Cerithidea cingulata     | Cerithidea |       |              |    |                                     |
| SSEO1211-16 | Cerithidea cingulata     | Cerithidea |       |              |    |                                     |
| SSEO1207-16 | Cerithidea cingulata     | Cerithidea |       |              |    |                                     |
| SSEO1206-16 | Cerithidea cingulata     | Cerithidea |       |              |    |                                     |
| SSEO1213-16 | Cerithidea cingulata     | Cerithidea |       |              |    |                                     |
| SSEO1210-16 | Cerithidea cingulata     | Cerithidea |       |              |    |                                     |
| SSEO1199-16 | Cerithidea cingulata     | Cerithidea |       |              |    |                                     |
| SSEO1196-16 | Cerithidea cingulata     | Cerithidea |       |              |    |                                     |
| SSEO1164-16 | Cerithidea cingulata     | Cerithidea |       |              |    |                                     |
| SSEO1204-16 | Cerithidea cingulata     | Cerithidea |       |              |    |                                     |
| SSEO1364-16 | Cerithidea cingulata     | Cerithidea |       |              |    |                                     |
| SSEO1205-16 | Cerithidea cingulata     | Cerithidea |       |              |    |                                     |
| SSEO1143-16 | Cerithidea djadjariensis | Cerithidea |       |              |    |                                     |
| SSEO1167-16 | Cerithidea djadjariensis | Cerithidea |       |              |    |                                     |
| SSEO1146-16 | Cerithidea djadjariensis | Cerithidea |       |              |    |                                     |
| SSEO1175-16 | Cerithidea djadjariensis | Cerithidea |       |              |    |                                     |
| SSEO1171-16 | Cerithidea djadjariensis | Cerithidea |       |              |    |                                     |
| SSEO1144-16 | Cerithidea djadjariensis | Cerithidea | Genus | BOLD:AAB1673 | 93 | Cerithidea[88], Cerithideopsilla[5] |
| SSEO1148-16 | Cerithidea djadjariensis | Cerithidea |       |              |    |                                     |
| SSEO1151-16 | Cerithidea djadjariensis | Cerithidea |       |              |    |                                     |
| SSEO1172-16 | Cerithidea djadjariensis | Cerithidea |       |              |    |                                     |
| SSEO1168-16 | Cerithidea djadjariensis | Cerithidea |       |              |    |                                     |

|              |                          |             |       |              |    |                                  |
|--------------|--------------------------|-------------|-------|--------------|----|----------------------------------|
| SSEO1374-16  | Cerithidea djadjariensis | Cerithidea  |       |              |    |                                  |
| SSEO1183-16  | Cerithidea djadjariensis | Cerithidea  |       |              |    |                                  |
| SSEO1186-16  | Cerithidea djadjariensis | Cerithidea  |       |              |    |                                  |
| SSEO1178-16  | Cerithidea djadjariensis | Cerithidea  |       |              |    |                                  |
| SSEO1169-16  | Cerithidea djadjariensis | Cerithidea  |       |              |    |                                  |
| SSEO1173-16  | Cerithidea djadjariensis | Cerithidea  |       |              |    |                                  |
| SSEO1184-16  | Cerithidea djadjariensis | Cerithidea  |       |              |    |                                  |
| SSEO1147-16  | Cerithidea djadjariensis | Cerithidea  |       |              |    |                                  |
| SSEO1166-16  | Cerithidea djadjariensis | Cerithidea  |       |              |    |                                  |
| SSEO1142-16  | Cerithidea djadjariensis | Cerithidea  |       |              |    |                                  |
| SSEO1165-16  | Cerithidea djadjariensis | Cerithidea  |       |              |    |                                  |
| SSEO1180-16  | Cerithidea djadjariensis | Cerithidea  |       |              |    |                                  |
| SSEO1150-16  | Cerithidea djadjariensis | Cerithidea  |       |              |    |                                  |
| SSEO1174-16  | Cerithidea djadjariensis | Cerithidea  |       |              |    |                                  |
| SSEO1170-16  | Cerithidea djadjariensis | Cerithidea  |       |              |    |                                  |
| SSEO1179-16  | Cerithidea djadjariensis | Cerithidea  |       |              |    |                                  |
| SSEO1149-16  | Cerithidea djadjariensis | Cerithidea  |       |              |    |                                  |
| SSEO1176-16  | Cerithidea djadjariensis | Cerithidea  |       |              |    |                                  |
| SSEO1181-16  | Cerithidea djadjariensis | Cerithidea  |       |              |    |                                  |
| SSEO1145-16  | Cerithidea djadjariensis | Cerithidea  |       |              |    |                                  |
| SSEO1185-16  | Cerithidea djadjariensis | Cerithidea  |       |              |    |                                  |
| SSEO1187-16  | Cerithidea largillierti  | Cerithidea  | Genus | BOLD:AAB4911 | 11 | Cerithidea[9], Cerithideopsis[2] |
| QWEAS1528-15 | Chlamys farreri          | Chlamys     | Genus | BOLD:AAE9030 | 7  | Azumapecten[99], Chlamys[3]      |
| SSEO1417-16  | Chlorostoma turbinatum   | Chlorostoma | Genus | BOLD:AAI1477 | 41 | Chlorostoma[30], Omphalius[11]   |
| SSEO1407-16  | Chlorostoma turbinatum   | Chlorostoma |       |              |    |                                  |
| SSEO1405-16  | Chlorostoma turbinatum   | Chlorostoma |       |              |    |                                  |
| SSEO1413-16  | Chlorostoma turbinatum   | Chlorostoma |       |              |    |                                  |
| SSEO1418-16  | Chlorostoma turbinatum   | Chlorostoma |       |              |    |                                  |
| SSEO1410-16  | Chlorostoma turbinatum   | Chlorostoma |       |              |    |                                  |
| SSEO1406-16  | Chlorostoma turbinatum   | Chlorostoma |       |              |    |                                  |

|             |                             |               |       |              |     |                                |
|-------------|-----------------------------|---------------|-------|--------------|-----|--------------------------------|
| SSEO1412-16 | Chlorostoma turbinatum      | Chlorostoma   |       |              |     |                                |
| SSEO1403-16 | Chlorostoma turbinatum      | Chlorostoma   |       |              |     |                                |
| SSEO1409-16 | Chlorostoma turbinatum      | Chlorostoma   |       |              |     |                                |
| SSEO1411-16 | Chlorostoma turbinatum      | Chlorostoma   |       |              |     |                                |
| SSEO1408-16 | Chlorostoma turbinatum      | Chlorostoma   |       |              |     |                                |
| SSEO1414-16 | Chlorostoma turbinatum      | Chlorostoma   |       |              |     |                                |
| SSEO1404-16 | Chlorostoma turbinatum      | Chlorostoma   |       |              |     |                                |
| SSEO1416-16 | Chlorostoma turbinatum      | Chlorostoma   |       |              |     |                                |
| SSEO1483-16 | Omphalius rusticus          | Omphalius     |       |              |     |                                |
| SSEO1482-16 | Omphalius rusticus rusticus | Omphalius     |       |              |     |                                |
| SSEO1481-16 | Omphalius rusticus rusticus | Omphalius     |       |              |     |                                |
| QWEAS931-15 | Placamen isabellina         | Clausinella   |       |              |     |                                |
| QWEAS929-15 | Placamen isabellina         | Clausinella   |       |              |     |                                |
| QWEAS927-15 | Placamen isabellina         | Clausinella   | Genus | BOLD:AAO8692 | 16  | Clausinella[11], Placamen[5]   |
| QWEAS930-15 | Placamen isabellina         | Clausinella   |       |              |     |                                |
| QWEAS928-15 | Placamen isabellina         | Clausinella   |       |              |     |                                |
| QWEAS084-15 | Corbula amurensis           | Corbula       |       |              |     |                                |
| QWEAS080-15 | Corbula amurensis           | Corbula       |       |              |     |                                |
| QWEAS087-15 | Corbula amurensis           | Corbula       |       |              |     |                                |
| QWEAS083-15 | Corbula amurensis           | Corbula       |       |              |     |                                |
| QWEAS078-15 | Corbula amurensis           | Corbula       |       |              |     |                                |
| QWEAS090-15 | Corbula amurensis           | Corbula       |       |              |     |                                |
| QWEAS086-15 | Corbula amurensis           | Corbula       | Genus | BOLD:ACH5927 | 104 | Corbula[62], Potamocorbula[42] |
| QWEAS082-15 | Corbula amurensis           | Corbula       |       |              |     |                                |
| QWEAS088-15 | Corbula amurensis           | Corbula       |       |              |     |                                |
| QWEAS081-15 | Corbula amurensis           | Corbula       |       |              |     |                                |
| QWEAS085-15 | Corbula amurensis           | Corbula       |       |              |     |                                |
| QWEAS079-15 | Corbula amurensis           | Corbula       |       |              |     |                                |
| QWEAS908-15 | Costacallista erycina       | Costacallista |       |              |     |                                |
| QWEAS909-15 | Costacallista erycina       | Costacallista | Genus | BOLD:AAK2197 | 18  | Costacallista[13], Callista[5] |

|              |                       |               |       |              |    |                                           |
|--------------|-----------------------|---------------|-------|--------------|----|-------------------------------------------|
| QWEAS1458-15 | Costacallista erycina | Costacallista |       |              |    |                                           |
| QWEAS1527-15 | Costacallista erycina | Costacallista |       |              |    |                                           |
| QWEAS1459-15 | Costacallista erycina | Costacallista |       |              |    |                                           |
| QWEAS906-15  | Costacallista erycina | Costacallista |       |              |    |                                           |
| QWEAS907-15  | Costacallista erycina | Costacallista |       |              |    |                                           |
| QWEAS519-15  | Cypraea vitellus      | Cypraea       | Genus | BOLD:AAJ2598 | 6  | Cypraea[3], Lyncina[2]                    |
| QWEAS1024-15 | Dosinia angulosa      | Dosinia       | Genus | BOLD:AAO9166 | 11 | Dosinia[9], Dosinella[3]                  |
| QWEAS1025-15 | Dosinia angulosa      | Dosinia       |       |              |    |                                           |
| QWEAS1026-15 | Dosinia angulosa      | Dosinia       |       |              |    |                                           |
| QWEAS1023-15 | Dosinia angulosa      | Dosinia       | Genus | BOLD:AAO5907 | 25 | Dosinia[18], Dosinella[7]                 |
| QWEAS1022-15 | Dosinia corrugata     | Dosinia       |       |              |    |                                           |
| QWEAS1019-15 | Dosinia corrugata     | Dosinia       |       |              |    |                                           |
| QWEAS1470-15 | Dosinia corrugata     | Dosinia       |       |              |    |                                           |
| QWEAS1469-15 | Dosinia corrugata     | Dosinia       |       |              |    |                                           |
| QWEAS1020-15 | Dosinia corrugata     | Dosinia       |       |              |    |                                           |
| QWEAS1016-15 | Dosinia corrugata     | Dosinia       |       |              |    |                                           |
| QWEAS1017-15 | Dosinia corrugata     | Dosinia       |       |              |    |                                           |
| QWEAS1021-15 | Dosinia corrugata     | Dosinia       | Genus | BOLD:AAL1648 | 12 | Dosinia[8], Phymosoma[3],<br>Dosinella[1] |
| QWEAS1018-15 | Dosinia corrugata     | Dosinia       |       |              |    |                                           |
| QWEAS1013-15 | Dosinia japonica      | Dosinia       |       |              |    |                                           |
| QWEAS1012-15 | Dosinia japonica      | Dosinia       |       |              |    |                                           |
| SSEO1093-16  | Drupella fragum       | Drupella      | Genus | BOLD:AAE1638 | 26 | Drupella[25], Coralliophila[1]            |
| SSEO1091-16  | Drupella fragum       | Drupella      |       |              |    |                                           |
| SSEO1085-16  | Drupella fragum       | Drupella      |       |              |    |                                           |
| SSEO1090-16  | Drupella fragum       | Drupella      |       |              |    |                                           |
| SSEO1092-16  | Drupella fragum       | Drupella      |       |              |    |                                           |
| SSEO1088-16  | Drupella fragum       | Drupella      |       |              |    |                                           |
| SSEO1083-16  | Drupella fragum       | Drupella      |       |              |    |                                           |
| SSEO1087-16  | Drupella fragum       | Drupella      |       |              |    |                                           |
| SSEO1086-16  | Drupella fragum       | Drupella      |       |              |    |                                           |

|              |                                     |                        |       |              |    |                                                              |
|--------------|-------------------------------------|------------------------|-------|--------------|----|--------------------------------------------------------------|
| SSEO1084-16  | <i>Drupella fragum</i>              | <i>Drupella</i>        |       |              |    |                                                              |
| SSEO1089-16  | <i>Drupella fragum</i>              | <i>Drupella</i>        |       |              |    |                                                              |
| SSEO1082-16  | <i>Drupella fragum</i>              | <i>Drupella</i>        |       |              |    |                                                              |
| QWEAS1510-15 | <i>Drupella margaritcola</i>        | <i>Drupella</i>        | Genus | BOLD:AAD8264 | 52 | <i>Drupella</i> [47], <i>Ergalatax</i> [5]                   |
| QWEAS1508-15 | <i>Drupella margaritcola</i>        | <i>Drupella</i>        |       |              |    |                                                              |
| QWEAS1509-15 | <i>Drupella margaritcola</i>        | <i>Drupella</i>        |       |              |    |                                                              |
| QWEAS1507-15 | <i>Drupella margaritcola</i>        | <i>Drupella</i>        |       |              |    |                                                              |
| QWEAS392-15  | <i>Drupella margaritcola</i>        | <i>Drupella</i>        |       |              |    |                                                              |
| QWEAS391-15  | <i>Drupella margaritcola</i>        | <i>Drupella</i>        |       |              |    |                                                              |
| QWEAS292-15  | <i>Drupella margaritcola</i>        | <i>Drupella</i>        |       |              |    |                                                              |
| QWEAS390-15  | <i>Drupella margaritcola</i>        | <i>Drupella</i>        |       |              |    |                                                              |
| QWEAS393-15  | <i>Drupella margaritcola</i>        | <i>Drupella</i>        |       |              |    |                                                              |
| QWEAS293-15  | <i>Drupella margaritcola</i>        | <i>Drupella</i>        |       |              |    |                                                              |
| SSEO1106-16  | <i>Drupella margaritcola</i>        | <i>Drupella</i>        |       |              |    |                                                              |
| SSEO1107-16  | <i>Drupella margaritcola</i>        | <i>Drupella</i>        | Genus | BOLD:AAD8263 | 42 | <i>Ergalatax</i> [7], <i>Drupella</i> [6], <i>Morula</i> [5] |
| SSEO1105-16  | <i>Drupella margaritcola</i>        | <i>Drupella</i>        |       |              |    |                                                              |
| QWEAS1583-15 | <i>Echinolittorina trochoides</i> A | <i>Echinolittorina</i> | Genus | BOLD:AAA7808 | 35 | <i>Echinolittorina</i> [33], <i>Nodilittorina</i> [2]        |
| QWEAS15-15   | <i>Erronea erronea</i>              | <i>Erronea</i>         | Genus | BOLD:AAF2702 | 6  | <i>Erronea</i> [5], <i>Blasicrura</i> [1]                    |
| SSEO308-16   | <i>Gonatus onyx</i>                 | <i>Gonatus</i>         | Genus | BOLD:AAD4845 | 11 | <i>Gonatus</i> [10], <i>Gonatopsis</i> [1]                   |
| SSEO352-16   | <i>Hapalochlaena lunulata</i>       | <i>Hapalochlaena</i>   | Genus | BOLD:AAI3607 | 3  | <i>Hapalochlaena</i> [2], <i>Callistoctopus</i> [1]          |
| SSEO474-16   | <i>Idasola japonica</i>             | <i>Idasola</i>         | Genus | BOLD:AAB6925 | 19 | <i>Idas</i> [19], <i>Idasola</i> [1]                         |
| QWEAS1464-15 | <i>Katelsia hiantina</i>            | <i>Katelsia</i>        | Genus | BOLD:AAO7358 | 36 | <i>Katelsia</i> [27], <i>Marcia</i> [9]                      |
| QWEAS1465-15 | <i>Katelsia hiantina</i>            | <i>Katelsia</i>        |       |              |    |                                                              |
| QWEAS1167-15 | <i>Katelsia hiantina</i>            | <i>Katelsia</i>        |       |              |    |                                                              |
| QWEAS1166-15 | <i>Katelsia hiantina</i>            | <i>Katelsia</i>        |       |              |    |                                                              |
| QWEAS1165-15 | <i>Katelsia hiantina</i>            | <i>Katelsia</i>        |       |              |    |                                                              |
| QWEAS1236-15 | <i>Katelsia hiantina</i>            | <i>Katelsia</i>        |       |              |    |                                                              |
| QWEAS1169-15 | <i>Katelsia hiantina</i>            | <i>Katelsia</i>        |       |              |    |                                                              |
| QWEAS1164-15 | <i>Katelsia hiantina</i>            | <i>Katelsia</i>        |       |              |    |                                                              |



|              |                            |             |       |              |     |                                          |
|--------------|----------------------------|-------------|-------|--------------|-----|------------------------------------------|
| QWEAS1162-15 | Katelysia hiantina         | Katelysia   |       |              |     |                                          |
| QWEAS1237-15 | Katelysia hiantina         | Katelysia   |       |              |     |                                          |
| QWEAS1163-15 | Katelysia hiantina         | Katelysia   |       |              |     |                                          |
| QWEAS1235-15 | Katelysia hiantina         | Katelysia   |       |              |     |                                          |
| QWEAS1168-15 | Katelysia hiantina         | Katelysia   |       |              |     |                                          |
| QWEAS531-15  | Lunatia alderi             | Lunatia     | Genus | BOLD:ACB8212 | 6   | Laguncula[4], Notocochlis[1], Lunatia[1] |
| QWEAS532-15  | Lunatia grossularia        | Lunatia     | Genus | BOLD:ACB6964 | 2   | Polinices[1], Lunatia[1]                 |
| QWEAS1254-15 | Macridiscus aequilatera    | Macridiscus | Genus | BOLD:AAO8016 | 141 | Macridiscus[127], Gomphina[7]            |
| QWEAS1253-15 | Macridiscus aequilatera    | Macridiscus |       |              |     |                                          |
| QWEAS1255-15 | Macridiscus aequilatera    | Macridiscus |       |              |     |                                          |
| QWEAS1252-15 | Macridiscus aequilatera    | Macridiscus |       |              |     |                                          |
| QWEAS1256-15 | Macridiscus aequilatera    | Macridiscus |       |              |     |                                          |
| QWEAS1152-15 | Macridiscus semicancellata | Macridiscus |       |              |     |                                          |
| QWEAS1155-15 | Macridiscus semicancellata | Macridiscus |       |              |     |                                          |
| QWEAS1151-15 | Macridiscus semicancellata | Macridiscus |       |              |     |                                          |
| QWEAS1427-15 | Macridiscus semicancellata | Macridiscus |       |              |     |                                          |
| QWEAS1429-15 | Macridiscus semicancellata | Macridiscus |       |              |     |                                          |
| QWEAS1426-15 | Macridiscus semicancellata | Macridiscus |       |              |     |                                          |
| QWEAS1422-15 | Macridiscus semicancellata | Macridiscus |       |              |     |                                          |
| QWEAS1428-15 | Macridiscus semicancellata | Macridiscus |       |              |     |                                          |
| QWEAS1424-15 | Macridiscus semicancellata | Macridiscus |       |              |     |                                          |
| QWEAS1425-15 | Macridiscus semicancellata | Macridiscus |       |              |     |                                          |
| QWEAS1150-15 | Macridiscus semicancellata | Macridiscus |       |              |     |                                          |
| QWEAS1156-15 | Macridiscus semicancellata | Macridiscus |       |              |     |                                          |
| QWEAS1154-15 | Macridiscus semicancellata | Macridiscus |       |              |     |                                          |
| QWEAS1153-15 | Macridiscus semicancellata | Macridiscus |       |              |     |                                          |
| QWEAS1423-15 | Macridiscus semicancellata | Macridiscus |       |              |     |                                          |
| QWEAS1148-15 | Macridiscus melanaegis     | Macridiscus | Genus | BOLD:AAL3879 | 15  | Macridiscus[10], Gomphina[3]             |
| QWEAS1149-15 | Macridiscus melanaegis     | Macridiscus |       |              |     |                                          |

|              |                         |            |       |              |    |                              |
|--------------|-------------------------|------------|-------|--------------|----|------------------------------|
| SSEO1112-16  | Mancinella siro         | Mancinella | Genus | BOLD:AAO9096 | 3  | Mancinella[2], Thais[1]      |
| QWEAS1174-15 | Marcia marmorata        | Marcia     | Genus | BOLD:AAO7359 | 25 | Marcia[24], Tapes[1]         |
| QWEAS1176-15 | Marcia marmorata        | Marcia     |       |              |    |                              |
| QWEAS1171-15 | Marcia marmorata        | Marcia     |       |              |    |                              |
| QWEAS1172-15 | Marcia marmorata        | Marcia     |       |              |    |                              |
| QWEAS1178-15 | Marcia marmorata        | Marcia     |       |              |    |                              |
| QWEAS1173-15 | Marcia marmorata        | Marcia     |       |              |    |                              |
| QWEAS1177-15 | Marcia marmorata        | Marcia     |       |              |    |                              |
| QWEAS1175-15 | Marcia marmorata        | Marcia     |       |              |    |                              |
| SSEO1134-16  | Morula spinosa          | Morula     | Genus | BOLD:AAR4788 | 8  | Morula[5], Cronia[1]         |
| SSEO1133-16  | Morula spinosa          | Morula     |       |              |    |                              |
| QWEAS294-15  | Nassarius siquijorensis | Nassarius  | Genus | BOLD:AAE0953 | 8  | Nassarius[6], Zeuxis[2]      |
| QWEAS295-15  | Nassarius siquijorensis | Nassarius  |       |              |    |                              |
| QWEAS296-15  | Nassarius siquijorensis | Nassarius  | Genus | BOLD:AAE0952 | 7  | Nassarius[4], Zeuxis[3]      |
| QWEAS533-15  | Natica tigrina          | Natica     | Genus | BOLD:ACB8211 | 2  | Notocochlis[1], Natica[1]    |
| QWEAS1308-15 | Nuttallia olivacea      | Nuttallia  | Genus | BOLD:ACQ3764 | 6  | Soletellina[4], Nuttallia[2] |
| QWEAS1309-15 | Nuttallia olivacea      | Nuttallia  |       |              |    |                              |
| SSEO341-16   | Octopus longispadiceus  | Octopus    | Genus | BOLD:AAD5241 | 13 | Muusoctopus[10], Octopus[3]  |
| QWEAS1345-15 | Octopus oshimai         | Octopus    | Genus | BOLD:AAB0289 | 25 | Octopus[23], Amphioctopus[1] |
| QWEAS225-15  | Octopus vulgaris        | Octopus    |       |              |    |                              |
| SSEO336-16   | Octopus vulgaris        | Octopus    |       |              |    |                              |
| SSEO335-16   | Octopus vulgaris        | Octopus    |       |              |    |                              |
| QWEAS1343-15 | Octopus vulgaris        | Octopus    |       |              |    |                              |
| QWEAS226-15  | Octopus vulgaris        | Octopus    |       |              |    |                              |
| QWEAS1349-15 | Octopus tankahkeei      | Octopus    | Genus | BOLD:ABA8846 | 18 | Cistopus[16], Octopus[2]     |
| SSEO728-16   | Ostrea stentina         | Ostrea     | Genus | BOLD:AAD3640 | 29 | Ostrea[21], Ostreola[7]      |
| SSEO725-16   | Ostrea stentina         | Ostrea     |       |              |    |                              |
| SSEO729-16   | Ostrea stentina         | Ostrea     |       |              |    |                              |
| SSEO724-16   | Ostrea stentina         | Ostrea     |       |              |    |                              |
| SSEO731-16   | Ostrea stentina         | Ostrea     |       |              |    |                              |

|              |                     |             |       |              |    |                                |
|--------------|---------------------|-------------|-------|--------------|----|--------------------------------|
| SSEO723-16   | Ostrea stentina     | Ostrea      |       |              |    |                                |
| SSEO722-16   | Ostrea stentina     | Ostrea      |       |              |    |                                |
| SSEO730-16   | Ostrea stentina     | Ostrea      |       |              |    |                                |
| SSEO726-16   | Ostrea stentina     | Ostrea      |       |              |    |                                |
| SSEO727-16   | Ostrea stentina     | Ostrea      | Genus | BOLD:AAD5609 | 6  | Ostreola[4], Ostrea[2]         |
| QWEAS1126-15 | Paphia amabilis     | Paphia      | Genus | BOLD:AAO8676 | 56 | Paphia[53], Meretrix[1]        |
| QWEAS1131-15 | Paphia amabilis     | Paphia      |       |              |    |                                |
| QWEAS1127-15 | Paphia amabilis     | Paphia      |       |              |    |                                |
| QWEAS1134-15 | Paphia amabilis     | Paphia      |       |              |    |                                |
| QWEAS1136-15 | Paphia amabilis     | Paphia      |       |              |    |                                |
| QWEAS1133-15 | Paphia amabilis     | Paphia      |       |              |    |                                |
| QWEAS1124-15 | Paphia amabilis     | Paphia      |       |              |    |                                |
| QWEAS1135-15 | Paphia amabilis     | Paphia      |       |              |    |                                |
| QWEAS1130-15 | Paphia amabilis     | Paphia      |       |              |    |                                |
| QWEAS1234-15 | Paphia amabilis     | Paphia      |       |              |    |                                |
| QWEAS1132-15 | Paphia amabilis     | Paphia      |       |              |    |                                |
| QWEAS1129-15 | Paphia amabilis     | Paphia      |       |              |    |                                |
| QWEAS1233-15 | Paphia amabilis     | Paphia      |       |              |    |                                |
| QWEAS1125-15 | Paphia amabilis     | Paphia      |       |              |    |                                |
| QWEAS1232-15 | Paphia amabilis     | Paphia      |       |              |    |                                |
| QWEAS1128-15 | Paphia amabilis     | Paphia      |       |              |    |                                |
| QWEAS1231-15 | Paphia amabilis     | Paphia      |       |              |    |                                |
| QWEAS1137-15 | Paphia amabilis     | Paphia      |       |              |    |                                |
| QWEAS932-15  | Placamen calophylla | Placamen    | Genus | BOLD:AAJ3245 | 12 | Placamen[11], Clausinella[1]   |
| QWEAS934-15  | Placamen calophylla | Placamen    |       |              |    |                                |
| QWEAS933-15  | Placamen calophylla | Placamen    |       |              |    |                                |
| QWEAS1582-15 | Platevindex mortoni | Platevindex | Genus | BOLD:AAM1753 | 35 | Platevindex[23], Onchidium[11] |
| QWEAS1581-15 | Platevindex mortoni | Platevindex |       |              |    |                                |
| QWEAS1578-15 | Platevindex mortoni | Platevindex |       |              |    |                                |
| QWEAS1580-15 | Platevindex mortoni | Platevindex |       |              |    |                                |

|              |                         |             |       |              |     |                               |
|--------------|-------------------------|-------------|-------|--------------|-----|-------------------------------|
| QWEAS1577-15 | Platevindex mortoni     | Platevindex |       |              |     |                               |
| SSEO1130-16  | Reishia bronni          | Reishia     | Genus | BOLD:ACB7390 | 81  | Thais[59], Reishia[22]        |
| SSEO1117-16  | Reishia bronni          | Reishia     |       |              |     |                               |
| SSEO1118-16  | Reishia bronni          | Reishia     |       |              |     |                               |
| SSEO1508-16  | Thais luteostoma        | Thais       |       |              |     |                               |
| SSEO1506-16  | Thais luteostoma        | Thais       |       |              |     |                               |
| SSEO1503-16  | Thais luteostoma        | Thais       |       |              |     |                               |
| SSEO1504-16  | Thais luteostoma        | Thais       |       |              |     |                               |
| SSEO1501-16  | Thais luteostoma        | Thais       |       |              |     |                               |
| SSEO1509-16  | Thais luteostoma        | Thais       |       |              |     |                               |
| SSEO1507-16  | Thais luteostoma        | Thais       |       |              |     |                               |
| SSEO1502-16  | Thais luteostoma        | Thais       |       |              |     |                               |
| SSEO1505-16  | Thais luteostoma        | Thais       |       |              |     |                               |
| QWEAS1521-15 | Thais luteostoma        | Thais       |       |              |     |                               |
| QWEAS357-15  | Thais luteostoma        | Thais       |       |              |     |                               |
| QWEAS356-15  | Thais luteostoma        | Thais       |       |              |     |                               |
| QWEAS358-15  | Thais luteostoma        | Thais       |       |              |     |                               |
| QWEAS359-15  | Thais luteostoma        | Thais       |       |              |     |                               |
| QWEAS360-15  | Thais luteostoma        | Thais       |       |              |     |                               |
| QWEAS361-15  | Thais luteostoma        | Thais       |       |              |     |                               |
| SSEO548-16   | Ruditapes philippinarum | Ruditapes   | Genus | BOLD:AAA3922 | 274 | Ruditapes[217], Venerupis[61] |
| SSEO556-16   | Ruditapes philippinarum | Ruditapes   |       |              |     |                               |
| SSEO554-16   | Ruditapes philippinarum | Ruditapes   |       |              |     |                               |
| SSEO1512-16  | Ruditapes philippinarum | Ruditapes   |       |              |     |                               |
| SSEO560-16   | Ruditapes philippinarum | Ruditapes   |       |              |     |                               |
| SSEO549-16   | Ruditapes philippinarum | Ruditapes   |       |              |     |                               |
| SSEO562-16   | Ruditapes philippinarum | Ruditapes   |       |              |     |                               |
| SSEO551-16   | Ruditapes philippinarum | Ruditapes   |       |              |     |                               |
| SSEO557-16   | Ruditapes philippinarum | Ruditapes   |       |              |     |                               |
| SSEO1511-16  | Ruditapes philippinarum | Ruditapes   |       |              |     |                               |

|              |                         |           |       |              |    |                             |
|--------------|-------------------------|-----------|-------|--------------|----|-----------------------------|
| SSEO552-16   | Ruditapes philippinarum | Ruditapes |       |              |    |                             |
| SSEO561-16   | Ruditapes philippinarum | Ruditapes |       |              |    |                             |
| SSEO550-16   | Ruditapes philippinarum | Ruditapes |       |              |    |                             |
| SSEO558-16   | Ruditapes philippinarum | Ruditapes |       |              |    |                             |
| SSEO553-16   | Ruditapes philippinarum | Ruditapes |       |              |    |                             |
| QWEAS1454-15 | Ruditapes philippinarum | Ruditapes |       |              |    |                             |
| QWEAS1455-15 | Ruditapes philippinarum | Ruditapes |       |              |    |                             |
| QWEAS1182-15 | Ruditapes philippinarum | Ruditapes |       |              |    |                             |
| QWEAS1184-15 | Ruditapes philippinarum | Ruditapes |       |              |    |                             |
| QWEAS1185-15 | Ruditapes philippinarum | Ruditapes |       |              |    |                             |
| QWEAS1245-15 | Ruditapes philippinarum | Ruditapes |       |              |    |                             |
| QWEAS1246-15 | Ruditapes philippinarum | Ruditapes |       |              |    |                             |
| QWEAS1179-15 | Ruditapes philippinarum | Ruditapes |       |              |    |                             |
| QWEAS1247-15 | Ruditapes philippinarum | Ruditapes |       |              |    |                             |
| QWEAS1243-15 | Ruditapes philippinarum | Ruditapes |       |              |    |                             |
| QWEAS1181-15 | Ruditapes philippinarum | Ruditapes |       |              |    |                             |
| QWEAS1244-15 | Ruditapes philippinarum | Ruditapes |       |              |    |                             |
| QWEAS1183-15 | Ruditapes philippinarum | Ruditapes |       |              |    |                             |
| QWEAS1186-15 | Ruditapes philippinarum | Ruditapes |       |              |    |                             |
| QWEAS1180-15 | Ruditapes philippinarum | Ruditapes |       |              |    |                             |
| QWEAS1250-15 | Ruditapes variegata     | Ruditapes |       |              |    |                             |
| QWEAS1187-15 | Ruditapes variegata     | Ruditapes |       |              |    |                             |
| QWEAS1248-15 | Ruditapes variegata     | Ruditapes |       |              |    |                             |
| QWEAS1251-15 | Ruditapes variegata     | Ruditapes |       |              |    |                             |
| QWEAS1189-15 | Ruditapes variegata     | Ruditapes |       |              |    |                             |
| QWEAS1188-15 | Ruditapes variegata     | Ruditapes | Genus | BOLD:AAH7873 | 26 | Ruditapes[25], Venerupis[1] |
| QWEAS1191-15 | Ruditapes variegata     | Ruditapes |       |              |    |                             |
| QWEAS1249-15 | Ruditapes variegata     | Ruditapes |       |              |    |                             |
| QWEAS1192-15 | Ruditapes variegata     | Ruditapes |       |              |    |                             |
| QWEAS1190-15 | Ruditapes variegata     | Ruditapes |       |              |    |                             |

|              |                         |             |       |              |    |                               |
|--------------|-------------------------|-------------|-------|--------------|----|-------------------------------|
| SSEO750-16   | Scapharca inaequalvis   | Scapharca   | Genus | BOLD:AAR4114 | 4  | Scapharca[2], Anadara[2]      |
| SSEO740-16   | Scapharca kagoshimensis | Scapharca   | Genus | BOLD:AAI0662 | 94 | Scapharca[66], Anadara[26]    |
| SSEO743-16   | Scapharca kagoshimensis | Scapharca   |       |              |    |                               |
| SSEO742-16   | Scapharca kagoshimensis | Scapharca   |       |              |    |                               |
| SSEO746-16   | Scapharca kagoshimensis | Scapharca   |       |              |    |                               |
| SSEO739-16   | Scapharca kagoshimensis | Scapharca   |       |              |    |                               |
| SSEO719-16   | Scapharca kagoshimensis | Scapharca   |       |              |    |                               |
| SSEO741-16   | Scapharca kagoshimensis | Scapharca   |       |              |    |                               |
| SSEO747-16   | Scapharca kagoshimensis | Scapharca   |       |              |    |                               |
| SSEO745-16   | Scapharca kagoshimensis | Scapharca   |       |              |    |                               |
| SSEO720-16   | Scapharca kagoshimensis | Scapharca   |       |              |    |                               |
| SSEO738-16   | Scapharca kagoshimensis | Scapharca   |       |              |    |                               |
| SSEO721-16   | Scapharca kagoshimensis | Scapharca   |       |              |    |                               |
| SSEO1367-16  | Scapharca kagoshimensis | Scapharca   |       |              |    |                               |
| SSEO748-16   | Scapharca kagoshimensis | Scapharca   |       |              |    |                               |
| QWEAS171-15  | Sepiella japonica       | Sepiella    | Genus | BOLD:AAD8673 | 47 | Sepiella[37], Sepia[4]        |
| QWEAS170-15  | Sepiella japonica       | Sepiella    |       |              |    |                               |
| QWEAS169-15  | Sepiella japonica       | Sepiella    |       |              |    |                               |
| SSEO058-16   | Sepiella maindroni      | Sepiella    |       |              |    |                               |
| QWEAS1313-15 | Soletellina diphos      | Soletellina | Genus | BOLD:ACQ3738 | 3  | Soletellina[2], Psammotaea[1] |
| QWEAS510-15  | Strombus lentiginosus   | Strombus    | Genus | BOLD:ACB7576 | 6  | Strombus[5], Canarium[1]      |
| QWEAS509-15  | Strombus lentiginosus   | Strombus    |       |              |    |                               |
| QWEAS508-15  | Strombus mutabilis      | Strombus    |       |              |    |                               |
| SSEO038-15   | Sunetta concinna        | Sunetta     | Genus | BOLD:AAO8013 | 8  | Sunetta[4], Chamelea[2]       |
| SSEO1260-16  | Terebralia sulcata      | Terebralia  | Genus | BOLD:AAE4101 | 16 | Terebralia[15], Cerithidea[1] |
| SSEO1255-16  | Terebralia sulcata      | Terebralia  |       |              |    |                               |
| QWEAS347-15  | Thais clavigera         | Thais       | Genus | BOLD:AAW6905 | 60 | Reishia[44], Thais[13]        |
| SSEO1499-16  | Thais clavigera         | Thais       |       |              |    |                               |
| SSEO1496-16  | Thais clavigera         | Thais       |       |              |    |                               |
| SSEO1500-16  | Thais clavigera         | Thais       |       |              |    |                               |

|             |                                    |                                    |         |              |    |                                                                                                                      |
|-------------|------------------------------------|------------------------------------|---------|--------------|----|----------------------------------------------------------------------------------------------------------------------|
| SSEO1497-16 | <i>Thais clavigera</i>             | <i>Thais</i>                       |         |              |    |                                                                                                                      |
| QWEAS351-15 | <i>Thais clavigera</i>             | <i>Thais</i>                       |         |              |    |                                                                                                                      |
| QWEAS348-15 | <i>Thais clavigera</i>             | <i>Thais</i>                       |         |              |    |                                                                                                                      |
| QWEAS346-15 | <i>Thais clavigera</i>             | <i>Thais</i>                       |         |              |    |                                                                                                                      |
| QWEAS349-15 | <i>Thais clavigera</i>             | <i>Thais</i>                       |         |              |    |                                                                                                                      |
| QWEAS350-15 | <i>Thais clavigera</i>             | <i>Thais</i>                       |         |              |    |                                                                                                                      |
| SSEO1498-16 | <i>Thais clavigera</i>             | <i>Thais</i>                       |         |              |    |                                                                                                                      |
| SSEO1510-16 | <i>Thais luteostoma</i>            | <i>Thais</i>                       |         |              |    |                                                                                                                      |
| QWEAS367-15 | <i>Thais mutabilis</i>             | <i>Thais</i>                       | Genus   | BOLD:ACB7302 | 24 | <i>Thais</i> [16], <i>Indothais</i> [8]                                                                              |
| QWEAS364-15 | <i>Thais mutabilis</i>             | <i>Thais</i>                       |         |              |    |                                                                                                                      |
| QWEAS363-15 | <i>Thais mutabilis</i>             | <i>Thais</i>                       |         |              |    |                                                                                                                      |
| QWEAS366-15 | <i>Thais mutabilis</i>             | <i>Thais</i>                       |         |              |    |                                                                                                                      |
| QWEAS365-15 | <i>Thais mutabilis</i>             | <i>Thais</i>                       |         |              |    |                                                                                                                      |
| QWEAS362-15 | <i>Thais mutabilis</i>             | <i>Thais</i>                       |         |              |    |                                                                                                                      |
| QWEAS140-15 | <i>Uroteuthis sibogae</i>          | <i>Uroteuthis</i>                  | Genus   | BOLD:AAD8238 | 18 | <i>Uroteuthis</i> [10], <i>Doryteuthis</i> [8]                                                                       |
| QWEAS141-15 | <i>Uroteuthis sibogae</i>          | <i>Uroteuthis</i>                  |         |              |    |                                                                                                                      |
| QWEAS142-15 | <i>Uroteuthis sibogae</i>          | <i>Uroteuthis</i>                  |         |              |    |                                                                                                                      |
| SSEO547-16  | <i>Venerupis bruguieri</i>         | <i>Venerupis</i>                   | Genus   | BOLD:AAW7336 | 8  | <i>Ruditapes</i> [6], <i>Venerupis</i> [2]                                                                           |
| QWEAS076-15 | <i>Xenostrobus atratus</i>         | <i>Xenostrobus</i>                 | Genus   | BOLD:ACQ2673 | 10 | <i>Xenostrobus</i> [5], <i>Limnoperna</i> [5]                                                                        |
| QWEAS075-15 | <i>Xenostrobus atratus</i>         | <i>Xenostrobus</i>                 |         |              |    |                                                                                                                      |
| QWEAS074-15 | <i>Xenostrobus atratus</i>         | <i>Xenostrobus</i>                 |         |              |    |                                                                                                                      |
| QWEAS073-15 | <i>Xenostrobus atratus</i>         | <i>Xenostrobus</i>                 |         |              |    |                                                                                                                      |
| QWEAS077-15 | <i>Xenostrobus atratus</i>         | <i>Xenostrobus</i>                 |         |              |    |                                                                                                                      |
| SSEO1379-16 | <i>Acanthochitona achates</i>      | <i>Acanthochitona achates</i>      | Species | BOLD:ACB8074 | 16 | <i>Acanthochitona rubrolineata</i> [8],<br><i>Acanthochitona achates</i> [4],<br><i>Acanthochitona defilippi</i> [3] |
| SSEO1380-16 | <i>Acanthochitona achates</i>      | <i>Acanthochitona achates</i>      |         |              |    |                                                                                                                      |
| SSEO1386-16 | <i>Acanthochitona defilippi</i>    | <i>Acanthochitona defilippi</i>    |         |              |    |                                                                                                                      |
| SSEO1391-16 | <i>Acanthochitona rubrolineata</i> | <i>Acanthochitona rubrolineata</i> |         |              |    |                                                                                                                      |
| SSEO1392-16 | <i>Acanthochitona rubrolineata</i> | <i>Acanthochitona rubrolineata</i> |         |              |    |                                                                                                                      |

|             |                             |                             |         |              |    |                                                                                                                       |
|-------------|-----------------------------|-----------------------------|---------|--------------|----|-----------------------------------------------------------------------------------------------------------------------|
| SSEO1394-16 | Acanthochitona rubrolineata | Acanthochitona rubrolineata |         |              |    |                                                                                                                       |
| SSEO1393-16 | Acanthochitona rubrolineata | Acanthochitona rubrolineata |         |              |    |                                                                                                                       |
| SSEO314-16  | Architeuthis dux            | Architeuthis dux            | Species | BOLD:AAC3700 | 65 | Architeuthis dux[60], Architeuthis sp. ARL-2008[1], Architeuthis sp.[1]                                               |
| SSEO315-16  | Architeuthis dux            | Architeuthis dux            |         |              |    |                                                                                                                       |
| SSEO296-16  | Architeuthis dux            | Architeuthis dux            |         |              |    |                                                                                                                       |
| SSEO312-16  | Architeuthis dux            | Architeuthis dux            |         |              |    |                                                                                                                       |
| SSEO305-16  | Architeuthis dux            | Architeuthis dux            |         |              |    |                                                                                                                       |
| SSEO313-16  | Architeuthis dux            | Architeuthis dux            |         |              |    |                                                                                                                       |
| QWEAS316-15 | Babylonia lutosa            | Babylonia lutosa            | Species | BOLD:AAW3123 | 3  | Babylonia lutosa[1], Babylonia formosae[1], Babylonia areolata[1]                                                     |
| SSEO440-16  | Bathymodiolus septemdierum  | Bathymodiolus septemdierum  | Species | BOLD:AAI7746 | 8  | Bathymodiolus brevior[8], Bathymodiolus septemdierum[6], Bathymodiolus marisindicus[2], Bathymodiolus aff. brevior[2] |
| SSEO442-16  | Bathymodiolus septemdierum  | Bathymodiolus septemdierum  |         |              |    |                                                                                                                       |
| SSEO424-16  | Bathymodiolus septemdierum  | Bathymodiolus septemdierum  |         |              |    |                                                                                                                       |
| SSEO1152-16 | Batillaria cumingii         | Batillaria cumingii         | Species | BOLD:ACB7408 | 15 | Batillaria attramentaria[13], Batillaria cumingii[2]                                                                  |
| QWEAS060-15 | Brachidontes mutabilis      | Brachidontes mutabilis      | Species | BOLD:AAD4589 | 12 | Brachidontes sp. 3 MC-morph[6], Brachidontes sp. 2 ON-morph[4], Brachidontes mutabilis[2]                             |
| QWEAS229-15 | Buccinum pemphigum          | Buccinum pemphigum          | Species | BOLD:AAW7286 | 8  | Buccinum pemphigum[7], Buccinum yokomaruae[1]                                                                         |
| QWEAS232-15 | Buccinum pemphigum          | Buccinum pemphigum          |         |              |    |                                                                                                                       |
| QWEAS230-15 | Buccinum pemphigum          | Buccinum pemphigum          |         |              |    |                                                                                                                       |
| QWEAS233-15 | Buccinum pemphigum          | Buccinum pemphigum          |         |              |    |                                                                                                                       |
| QWEAS234-15 | Buccinum pemphigum          | Buccinum pemphigum          |         |              |    |                                                                                                                       |
| QWEAS231-15 | Buccinum pemphigum          | Buccinum pemphigum          |         |              |    |                                                                                                                       |
| SSEO886-16  | Calliostoma aculeatum       | Calliostoma aculeatum       | Species | BOLD:AAW8762 | 4  | Calliostoma sakashitai[2],                                                                                            |



|             |                           |                              |         |              |    |                                                           |
|-------------|---------------------------|------------------------------|---------|--------------|----|-----------------------------------------------------------|
| SSEO879-16  | Calliostoma sakashitai    | Calliostoma sakashitai       |         |              |    | Calliostoma aculeatum[2]                                  |
| SSEO884-16  | Calliostoma consors       | Calliostoma consors          | Species | BOLD:AAW8761 | 4  | Calliostoma consors[2],<br>Calliostoma unicum[1]          |
| SSEO680-16  | Calyptogena kawamurai     | Calyptogena kawamurai        | Species | BOLD:AAC7877 | 11 | Calyptogena solidissima[9],<br>Calyptogena kawamurai[2]   |
| SSEO774-16  | Cantharidus bisbalteatus  | Cantharidus<br>bisbalteatus  | Species | BOLD:ACB7697 | 4  | Cantharidus jessoensis[2],<br>Cantharidus bisbalteatus[2] |
| SSEO772-16  | Cantharidus jessoensis    | Cantharidus jessoensis       |         |              |    |                                                           |
| SSEO990-16  | Cellana grata             | Cellana grata                | Species | BOLD:AAW6225 | 10 | Cellana grata[8], Cellana<br>nigrolineata[2]              |
| SSEO989-16  | Cellana grata             | Cellana grata                |         |              |    |                                                           |
| SSEO991-16  | Cellana grata             | Cellana grata                |         |              |    |                                                           |
| SSEO992-16  | Cellana grata             | Cellana grata                |         |              |    |                                                           |
| SSEO915-16  | Cellana nigrolineata      | Cellana nigrolineata         |         |              |    |                                                           |
| SSEO896-16  | Cellana radiata           | Cellana radiata              | Species | BOLD:AAC0533 | 25 | Cellana radiata[21], Cellana radiata<br>enneagona[4]      |
| SSEO902-16  | Cellana radiata           | Cellana radiata              |         |              |    |                                                           |
| SSEO868-16  | Cellana radiata           | Cellana radiata              |         |              |    |                                                           |
| SSEO898-16  | Cellana radiata           | Cellana radiata              |         |              |    |                                                           |
| SSEO901-16  | Cellana radiata           | Cellana radiata              |         |              |    |                                                           |
| SSEO903-16  | Cellana radiata           | Cellana radiata              |         |              |    |                                                           |
| SSEO867-16  | Cellana radiata           | Cellana radiata              |         |              |    |                                                           |
| SSEO900-16  | Cellana radiata           | Cellana radiata              |         |              |    |                                                           |
| SSEO899-16  | Cellana radiata           | Cellana radiata              |         |              |    |                                                           |
| SSEO894-16  | Cellana radiata           | Cellana radiata              |         |              |    |                                                           |
| SSEO892-16  | Cellana radiata enneagona | Cellana radiata<br>enneagona |         |              |    |                                                           |
| SSEO893-16  | Cellana radiata enneagona | Cellana radiata<br>enneagona |         |              |    |                                                           |
| SSEO1238-16 | Cerithidea rhizophorarum  | Cerithidea<br>rhizophorarum  |         |              |    |                                                           |
| SSEO1240-16 | Cerithidea rhizophorarum  | Cerithidea                   |         |              |    |                                                           |

|             |                          |                          |  |  |  |  |
|-------------|--------------------------|--------------------------|--|--|--|--|
|             |                          | rhizophorarum            |  |  |  |  |
| SSEO1219-16 | Cerithidea rhizophorarum | Cerithidea rhizophorarum |  |  |  |  |
| SSEO1241-16 | Cerithidea rhizophorarum | Cerithidea rhizophorarum |  |  |  |  |
| SSEO1190-16 | Cerithidea rhizophorarum | Cerithidea rhizophorarum |  |  |  |  |
| SSEO1189-16 | Cerithidea rhizophorarum | Cerithidea rhizophorarum |  |  |  |  |
| SSEO1375-16 | Cerithidea rhizophorarum | Cerithidea rhizophorarum |  |  |  |  |
| SSEO1242-16 | Cerithidea rhizophorarum | Cerithidea rhizophorarum |  |  |  |  |
| SSEO1231-16 | Cerithidea rhizophorarum | Cerithidea rhizophorarum |  |  |  |  |
| SSEO1227-16 | Cerithidea rhizophorarum | Cerithidea rhizophorarum |  |  |  |  |
| SSEO1244-16 | Cerithidea rhizophorarum | Cerithidea rhizophorarum |  |  |  |  |
| SSEO1225-16 | Cerithidea rhizophorarum | Cerithidea rhizophorarum |  |  |  |  |
| SSEO1220-16 | Cerithidea rhizophorarum | Cerithidea rhizophorarum |  |  |  |  |
| SSEO1230-16 | Cerithidea rhizophorarum | Cerithidea rhizophorarum |  |  |  |  |
| SSEO1232-16 | Cerithidea rhizophorarum | Cerithidea rhizophorarum |  |  |  |  |
| SSEO1218-16 | Cerithidea rhizophorarum | Cerithidea rhizophorarum |  |  |  |  |
| SSEO1234-16 | Cerithidea rhizophorarum | Cerithidea               |  |  |  |  |

|              |                          |                          |  |  |  |  |
|--------------|--------------------------|--------------------------|--|--|--|--|
|              |                          | rhizophorarum            |  |  |  |  |
| SSEO1228-16  | Cerithidea rhizophorarum | Cerithidea rhizophorarum |  |  |  |  |
| SSEO1223-16  | Cerithidea rhizophorarum | Cerithidea rhizophorarum |  |  |  |  |
| SSEO1235-16  | Cerithidea rhizophorarum | Cerithidea rhizophorarum |  |  |  |  |
| SSEO1236-16  | Cerithidea rhizophorarum | Cerithidea rhizophorarum |  |  |  |  |
| SSEO1215-16  | Cerithidea rhizophorarum | Cerithidea rhizophorarum |  |  |  |  |
| QWEAS1584-15 | Cerithidea rhizophorarum | Cerithidea rhizophorarum |  |  |  |  |
| QWEAS1585-15 | Cerithidea rhizophorarum | Cerithidea rhizophorarum |  |  |  |  |
| SSEO1226-16  | Cerithidea rhizophorarum | Cerithidea rhizophorarum |  |  |  |  |
| SSEO1221-16  | Cerithidea rhizophorarum | Cerithidea rhizophorarum |  |  |  |  |
| SSEO1237-16  | Cerithidea rhizophorarum | Cerithidea rhizophorarum |  |  |  |  |
| SSEO1376-16  | Cerithidea rhizophorarum | Cerithidea rhizophorarum |  |  |  |  |
| SSEO1224-16  | Cerithidea rhizophorarum | Cerithidea rhizophorarum |  |  |  |  |
| SSEO1229-16  | Cerithidea rhizophorarum | Cerithidea rhizophorarum |  |  |  |  |
| SSEO1239-16  | Cerithidea rhizophorarum | Cerithidea rhizophorarum |  |  |  |  |
| SSEO1222-16  | Cerithidea rhizophorarum | Cerithidea               |  |  |  |  |

|              |                          |                          |         |              |     |                                                                              |
|--------------|--------------------------|--------------------------|---------|--------------|-----|------------------------------------------------------------------------------|
|              |                          | rhizophorarum            |         |              |     |                                                                              |
| SSEO1233-16  | Cerithidea rhizophorarum | Cerithidea rhizophorarum |         |              |     |                                                                              |
| SSEO1216-16  | Cerithidea rhizophorarum | Cerithidea rhizophorarum |         |              |     |                                                                              |
| QWEAS383-15  | Chicoreus torrefactus    | Chicoreus torrefactus    | Species | BOLD:AAJ0544 | 22  | Chicoreus torrefactus[10], Chicoreus sp.[1], Chicoreus aculeatus[1]          |
| QWEAS380-15  | Chicoreus torrefactus    | Chicoreus torrefactus    |         |              |     |                                                                              |
| QWEAS382-15  | Chicoreus torrefactus    | Chicoreus torrefactus    |         |              |     |                                                                              |
| QWEAS381-15  | Chicoreus torrefactus    | Chicoreus torrefactus    |         |              |     |                                                                              |
| QWEAS1344-15 | Cistopus indicus         | Cistopus indicus         | Species | BOLD:ABA3763 | 13  | Cistopus indicus[5], Cistopus taiwanicus[4], Cistopus cf. indicus NK-2008[1] |
| QWEAS211-15  | Cistopus taiwanicus      | Cistopus taiwanicus      |         |              |     |                                                                              |
| QWEAS210-15  | Cistopus taiwanicus      | Cistopus taiwanicus      |         |              |     |                                                                              |
| SSEO1049-16  | Conus lividus            | Conus lividus            | Species | BOLD:AAO6206 | 79  | Conus lividus[78], Conus sanguinolentus[1]                                   |
| SSEO1047-16  | Conus lividus            | Conus lividus            |         |              |     |                                                                              |
| SSEO1048-16  | Conus lividus            | Conus lividus            |         |              |     |                                                                              |
| QWEAS326-15  | Conus sanguinolentus     | Conus sanguinolentus     | Species | BOLD:ACB8444 | 119 | Conus sanguinolentus[118], Conus lividus[1]                                  |
| SSEO1041-16  | Conus sanguinolentus     | Conus sanguinolentus     |         |              |     |                                                                              |
| SSEO1077-16  | Conus sanguinolentus     | Conus sanguinolentus     |         |              |     |                                                                              |
| SSEO1080-16  | Conus sanguinolentus     | Conus sanguinolentus     |         |              |     |                                                                              |
| SSEO1044-16  | Conus sanguinolentus     | Conus sanguinolentus     |         |              |     |                                                                              |
| SSEO1040-16  | Conus sanguinolentus     | Conus sanguinolentus     |         |              |     |                                                                              |
| SSEO1079-16  | Conus sanguinolentus     | Conus sanguinolentus     |         |              |     |                                                                              |
| SSEO1061-16  | Conus sanguinolentus     | Conus sanguinolentus     |         |              |     |                                                                              |
| SSEO1046-16  | Conus sanguinolentus     | Conus sanguinolentus     |         |              |     |                                                                              |
| SSEO1053-16  | Conus sanguinolentus     | Conus sanguinolentus     |         |              |     |                                                                              |
| SSEO1076-16  | Conus sanguinolentus     | Conus sanguinolentus     |         |              |     |                                                                              |
| SSEO1045-16  | Conus sanguinolentus     | Conus sanguinolentus     |         |              |     |                                                                              |
| SSEO1078-16  | Conus sanguinolentus     | Conus sanguinolentus     |         |              |     |                                                                              |
| SSEO1042-16  | Conus sanguinolentus     | Conus sanguinolentus     |         |              |     |                                                                              |
| SSEO1043-16  | Conus sanguinolentus     | Conus sanguinolentus     |         |              |     |                                                                              |

|            |                    |                    |         |              |     |                                                                                                                                                                                                                                                                                                                                                                                                                                                                                                                                                                                                                                                     |
|------------|--------------------|--------------------|---------|--------------|-----|-----------------------------------------------------------------------------------------------------------------------------------------------------------------------------------------------------------------------------------------------------------------------------------------------------------------------------------------------------------------------------------------------------------------------------------------------------------------------------------------------------------------------------------------------------------------------------------------------------------------------------------------------------|
| SSEO597-16 | Corbicula fluminea | Corbicula fluminea | Species | BOLD:ACF5867 | 86  | Corbicula leana[29], Corbicula fluminea[15], Corbicula sp.[13], Corbicula africana[4], Corbicula North American form B[3], Corbicula fluminalis[3], Corbicula sp. China/CN-F[1], Corbicula sp. China/CN-B[1], Corbicula sp. China/CN-G[1], Corbicula sp. China/CN-C[1], Corbicula sp. LMP-2010[1], Corbicula sp. PKa-2002[1], Corbicula sp. 57Rho2[1], Corbicula sp. PKb-2002[1], Corbicula sp. China/CN-H[1], Corbicula sp. 34IL4[1], Corbicula sp. 31IL1[1], Corbicula North American form C[1], Corbicula javanica[1], Corbicula sp. 32IL2[1], Corbicula sp. 33IL3[1], Corbicula sp. 44C_ea[1], Corbicula sp. 35IL11[1], Corbicula sp. 56Rho1[1] |
| SSEO588-16 | Corbicula fluminea | Corbicula fluminea |         |              |     |                                                                                                                                                                                                                                                                                                                                                                                                                                                                                                                                                                                                                                                     |
| SSEO595-16 | Corbicula fluminea | Corbicula fluminea |         |              |     |                                                                                                                                                                                                                                                                                                                                                                                                                                                                                                                                                                                                                                                     |
| SSEO592-16 | Corbicula fluminea | Corbicula fluminea |         |              |     |                                                                                                                                                                                                                                                                                                                                                                                                                                                                                                                                                                                                                                                     |
| SSEO590-16 | Corbicula fluminea | Corbicula fluminea |         |              |     |                                                                                                                                                                                                                                                                                                                                                                                                                                                                                                                                                                                                                                                     |
| SSEO536-16 | Corbicula fluminea | Corbicula fluminea |         |              |     |                                                                                                                                                                                                                                                                                                                                                                                                                                                                                                                                                                                                                                                     |
| SSEO668-16 | Corbicula leana    | Corbicula leana    |         |              |     |                                                                                                                                                                                                                                                                                                                                                                                                                                                                                                                                                                                                                                                     |
| SSEO661-16 | Corbicula leana    | Corbicula leana    |         |              |     |                                                                                                                                                                                                                                                                                                                                                                                                                                                                                                                                                                                                                                                     |
| SSEO666-16 | Corbicula leana    | Corbicula leana    |         |              |     |                                                                                                                                                                                                                                                                                                                                                                                                                                                                                                                                                                                                                                                     |
| SSEO662-16 | Corbicula leana    | Corbicula leana    |         |              |     |                                                                                                                                                                                                                                                                                                                                                                                                                                                                                                                                                                                                                                                     |
| SSEO667-16 | Corbicula leana    | Corbicula leana    |         |              |     |                                                                                                                                                                                                                                                                                                                                                                                                                                                                                                                                                                                                                                                     |
| SSEO601-16 | Corbicula japonica | Corbicula japonica | Species | BOLD:AAC3963 | 219 | Corbicula japonica[199], Corbicula fluminalis[3], Corbicula sp. Kor2[1], Corbicula sp. Kor3[1], Corbicula sp. Kor4[1], Corbicula sp. T01[1], Corbicula sp. Kor1[1], Corbicula sp. Jpn5[1], Corbicula fluminea[1], Corbicula sp.[1], Corbicula sp. Jpn1[1], Corbicula sp. Jpn3[1], Corbicula sp. Jpn6[1]                                                                                                                                                                                                                                                                                                                                             |
| SSEO637-16 | Corbicula japonica | Corbicula japonica |         |              |     |                                                                                                                                                                                                                                                                                                                                                                                                                                                                                                                                                                                                                                                     |
| SSEO623-16 | Corbicula japonica | Corbicula japonica |         |              |     |                                                                                                                                                                                                                                                                                                                                                                                                                                                                                                                                                                                                                                                     |
| SSEO627-16 | Corbicula japonica | Corbicula japonica |         |              |     |                                                                                                                                                                                                                                                                                                                                                                                                                                                                                                                                                                                                                                                     |
| SSEO643-16 | Corbicula japonica | Corbicula japonica |         |              |     |                                                                                                                                                                                                                                                                                                                                                                                                                                                                                                                                                                                                                                                     |
| SSEO652-16 | Corbicula japonica | Corbicula japonica |         |              |     |                                                                                                                                                                                                                                                                                                                                                                                                                                                                                                                                                                                                                                                     |
| SSEO635-16 | Corbicula japonica | Corbicula japonica |         |              |     |                                                                                                                                                                                                                                                                                                                                                                                                                                                                                                                                                                                                                                                     |
| SSEO631-16 | Corbicula japonica | Corbicula japonica |         |              |     |                                                                                                                                                                                                                                                                                                                                                                                                                                                                                                                                                                                                                                                     |
| SSEO638-16 | Corbicula japonica | Corbicula japonica |         |              |     |                                                                                                                                                                                                                                                                                                                                                                                                                                                                                                                                                                                                                                                     |

|             |                    |                    |  |  |  |  |
|-------------|--------------------|--------------------|--|--|--|--|
| SSEO647-16  | Corbicula japonica | Corbicula japonica |  |  |  |  |
| SSEO657-16  | Corbicula japonica | Corbicula japonica |  |  |  |  |
| SSEO654-16  | Corbicula japonica | Corbicula japonica |  |  |  |  |
| SSEO639-16  | Corbicula japonica | Corbicula japonica |  |  |  |  |
| SSEO625-16  | Corbicula japonica | Corbicula japonica |  |  |  |  |
| SSEO655-16  | Corbicula japonica | Corbicula japonica |  |  |  |  |
| SSEO603-16  | Corbicula japonica | Corbicula japonica |  |  |  |  |
| SSEO628-16  | Corbicula japonica | Corbicula japonica |  |  |  |  |
| SSEO604-16  | Corbicula japonica | Corbicula japonica |  |  |  |  |
| SSEO644-16  | Corbicula japonica | Corbicula japonica |  |  |  |  |
| SSEO651-16  | Corbicula japonica | Corbicula japonica |  |  |  |  |
| SSEO670-16  | Corbicula japonica | Corbicula japonica |  |  |  |  |
| SSEO641-16  | Corbicula japonica | Corbicula japonica |  |  |  |  |
| SSEO649-16  | Corbicula japonica | Corbicula japonica |  |  |  |  |
| SSEO626-16  | Corbicula japonica | Corbicula japonica |  |  |  |  |
| SSEO653-16  | Corbicula japonica | Corbicula japonica |  |  |  |  |
| SSEO599-16  | Corbicula japonica | Corbicula japonica |  |  |  |  |
| SSEO636-16  | Corbicula japonica | Corbicula japonica |  |  |  |  |
| SSEO646-16  | Corbicula japonica | Corbicula japonica |  |  |  |  |
| SSEO656-16  | Corbicula japonica | Corbicula japonica |  |  |  |  |
| SSEO629-16  | Corbicula japonica | Corbicula japonica |  |  |  |  |
| SSEO634-16  | Corbicula japonica | Corbicula japonica |  |  |  |  |
| SSEO630-16  | Corbicula japonica | Corbicula japonica |  |  |  |  |
| SSEO671-16  | Corbicula japonica | Corbicula japonica |  |  |  |  |
| SSEO606-16  | Corbicula japonica | Corbicula japonica |  |  |  |  |
| SSEO650-16  | Corbicula japonica | Corbicula japonica |  |  |  |  |
| SSEO642-16  | Corbicula japonica | Corbicula japonica |  |  |  |  |
| SSEO1366-16 | Corbicula japonica | Corbicula japonica |  |  |  |  |
| SSEO640-16  | Corbicula japonica | Corbicula japonica |  |  |  |  |
| SSEO632-16  | Corbicula japonica | Corbicula japonica |  |  |  |  |

|            |                    |                    |         |              |     |                                                                                                                                                                                                                                                                                                                                                                                                                                                                                                                                                                                                                                                                                                                                                                                                          |
|------------|--------------------|--------------------|---------|--------------|-----|----------------------------------------------------------------------------------------------------------------------------------------------------------------------------------------------------------------------------------------------------------------------------------------------------------------------------------------------------------------------------------------------------------------------------------------------------------------------------------------------------------------------------------------------------------------------------------------------------------------------------------------------------------------------------------------------------------------------------------------------------------------------------------------------------------|
| SSEO669-16 | Corbicula japonica | Corbicula japonica |         |              |     |                                                                                                                                                                                                                                                                                                                                                                                                                                                                                                                                                                                                                                                                                                                                                                                                          |
| SSEO645-16 | Corbicula japonica | Corbicula japonica |         |              |     |                                                                                                                                                                                                                                                                                                                                                                                                                                                                                                                                                                                                                                                                                                                                                                                                          |
| SSEO633-16 | Corbicula japonica | Corbicula japonica |         |              |     |                                                                                                                                                                                                                                                                                                                                                                                                                                                                                                                                                                                                                                                                                                                                                                                                          |
| SSEO663-16 | Corbicula leana    | Corbicula leana    |         |              |     | Corbicula fluminea[25], Corbicula North American form A[13], Corbicula leana[6], Corbicula largillierti[2], Corbicula sp. 37Virg2[1], Corbicula sp. 36Virg1[1], Corbicula sp. 38Virg3[1], Corbicula sp. 29HK2[1], Corbicula sp. 53WC1[1], Corbicula sp. 28HK1[1], Corbicula sp. 30HK3[1], Corbicula sp. 58Sao1[1], Corbicula sp. LMP-2010[1], Corbicula sp. Taiwan[1], Corbicula sp. 60Sao4[1], Corbicula sp. 59Sao2[1], Corbicula sp. 55WC5[1], Corbicula sp. 27Wi9[1], Corbicula sp. 54WC3[1], Corbicula sp. 24Le3[1], Corbicula sp. 14B4[1], Corbicula sp. 16506_10[1], Corbicula sp. 13B20[1], Corbicula sp. 12B19[1], Corbicula javanica[1], Corbicula sp. 02A15[1], Corbicula sp. 19560_34[1], Corbicula sp. 20De6[1], Corbicula cf. fluminea[1], Corbicula sp. 25Wi10[1], Corbicula sp. 23Le1[1], |
| SSEO665-16 | Corbicula leana    | Corbicula leana    |         |              |     |                                                                                                                                                                                                                                                                                                                                                                                                                                                                                                                                                                                                                                                                                                                                                                                                          |
| SSEO664-16 | Corbicula leana    | Corbicula leana    | Species | BOLD:AAC2296 | 543 |                                                                                                                                                                                                                                                                                                                                                                                                                                                                                                                                                                                                                                                                                                                                                                                                          |

|              |                           |                           |         |              |     |                                                                                                                                                                                                                                                                                                   |
|--------------|---------------------------|---------------------------|---------|--------------|-----|---------------------------------------------------------------------------------------------------------------------------------------------------------------------------------------------------------------------------------------------------------------------------------------------------|
|              |                           |                           |         |              |     | Corbicula sp. 22Ko4[1], Corbicula sp. 21De7[1], Corbicula sp. 26Wi3[1]                                                                                                                                                                                                                            |
| QWEAS020-15  | Crassostrea ariakensis    | Crassostrea ariakensis    | Species | BOLD:AAD6870 | 38  | Crassostrea ariakensis[34],<br>Crassostrea sp. RE-2008[2]                                                                                                                                                                                                                                         |
| QWEAS019-15  | Crassostrea ariakensis    | Crassostrea ariakensis    |         |              |     |                                                                                                                                                                                                                                                                                                   |
| QWEAS1535-15 | Crassostrea ariakensis    | Crassostrea ariakensis    |         |              |     |                                                                                                                                                                                                                                                                                                   |
| QWEAS1533-15 | Crassostrea hongkongensis | Crassostrea hongkongensis | Species | BOLD:AAE3959 | 35  | Crassostrea hongkongensis[23],<br>Crassostrea sp. WE-2008[3],<br>Crassostrea sp. F-KL-2003[1],<br>Crassostrea sp. SL-2003[1],<br>Crassostrea sp. E-KL-2003[1],<br>Crassostrea sp. D-KL-2003[1],<br>Crassostrea sp. A-KL-2003[1],<br>Crassostrea sp. B-KL-2003[1],<br>Crassostrea sp. C-KL-2003[1] |
| QWEAS1531-15 | Crassostrea hongkongensis | Crassostrea hongkongensis |         |              |     |                                                                                                                                                                                                                                                                                                   |
| QWEAS1532-15 | Crassostrea hongkongensis | Crassostrea hongkongensis |         |              |     |                                                                                                                                                                                                                                                                                                   |
| QWEAS1534-15 | Crassostrea hongkongensis | Crassostrea hongkongensis |         |              |     |                                                                                                                                                                                                                                                                                                   |
| QWEAS022-15  | Crassostrea iredalei      | Crassostrea iredalei      | Species | BOLD:AAB5109 | 119 | Crassostrea iredalei[87],<br>Crassostrea madrasensis[29],<br>Crassostrea sp. KL-2003[1]                                                                                                                                                                                                           |
| QWEAS021-15  | Crassostrea iredalei      | Crassostrea iredalei      |         |              |     |                                                                                                                                                                                                                                                                                                   |
| SSEO712-16   | Crassostrea sikamea       | Crassostrea sikamea       | Species | BOLD:AAI9053 | 73  | Crassostrea sikamea[69],<br>Crassostrea sp. HL-2008[2]                                                                                                                                                                                                                                            |
| SSEO716-16   | Crassostrea sikamea       | Crassostrea sikamea       |         |              |     |                                                                                                                                                                                                                                                                                                   |
| SSEO709-16   | Crassostrea sikamea       | Crassostrea sikamea       |         |              |     |                                                                                                                                                                                                                                                                                                   |
| SSEO706-16   | Crassostrea sikamea       | Crassostrea sikamea       |         |              |     |                                                                                                                                                                                                                                                                                                   |
| SSEO711-16   | Crassostrea sikamea       | Crassostrea sikamea       |         |              |     |                                                                                                                                                                                                                                                                                                   |
| SSEO702-16   | Crassostrea sikamea       | Crassostrea sikamea       |         |              |     |                                                                                                                                                                                                                                                                                                   |
| SSEO705-16   | Crassostrea sikamea       | Crassostrea sikamea       |         |              |     |                                                                                                                                                                                                                                                                                                   |
| SSEO703-16   | Crassostrea sikamea       | Crassostrea sikamea       |         |              |     |                                                                                                                                                                                                                                                                                                   |
| SSEO717-16   | Crassostrea sikamea       | Crassostrea sikamea       |         |              |     |                                                                                                                                                                                                                                                                                                   |
| SSEO708-16   | Crassostrea sikamea       | Crassostrea sikamea       |         |              |     |                                                                                                                                                                                                                                                                                                   |
| SSEO718-16   | Crassostrea sikamea       | Crassostrea sikamea       |         |              |     |                                                                                                                                                                                                                                                                                                   |
| SSEO707-16   | Crassostrea sikamea       | Crassostrea sikamea       |         |              |     |                                                                                                                                                                                                                                                                                                   |



|              |                     |                     |         |              |    |                                                                          |
|--------------|---------------------|---------------------|---------|--------------|----|--------------------------------------------------------------------------|
| SSEO704-16   | Crassostrea sikamea | Crassostrea sikamea |         |              |    |                                                                          |
| SSEO733-16   | Crassostrea sikamea | Crassostrea sikamea |         |              |    |                                                                          |
| SSEO710-16   | Crassostrea sikamea | Crassostrea sikamea |         |              |    |                                                                          |
| QWEAS014-15  | Crassostrea sikamea | Crassostrea sikamea |         |              |    |                                                                          |
| QWEAS009-15  | Crassostrea sikamea | Crassostrea sikamea |         |              |    |                                                                          |
| QWEAS017-15  | Crassostrea sikamea | Crassostrea sikamea |         |              |    |                                                                          |
| QWEAS013-15  | Crassostrea sikamea | Crassostrea sikamea |         |              |    |                                                                          |
| QWEAS010-15  | Crassostrea sikamea | Crassostrea sikamea |         |              |    |                                                                          |
| QWEAS015-15  | Crassostrea sikamea | Crassostrea sikamea |         |              |    |                                                                          |
| QWEAS011-15  | Crassostrea sikamea | Crassostrea sikamea |         |              |    |                                                                          |
| QWEAS016-15  | Crassostrea sikamea | Crassostrea sikamea |         |              |    |                                                                          |
| QWEAS012-15  | Crassostrea sikamea | Crassostrea sikamea |         |              |    |                                                                          |
| QWEAS018-15  | Crassostrea sikamea | Crassostrea sikamea |         |              |    |                                                                          |
| SSEO732-16   | Crassostrea sikamea | Crassostrea sikamea |         |              |    |                                                                          |
| SSEO073-16   | Cuvierina pacifica  | Cuvierina pacifica  | Species | BOLD:ACH8721 | 53 | Cuvierina pacifica[48], Cuvierina columnella[3], Cuvierina urceolaris[2] |
| SSEO075-16   | Cuvierina pacifica  | Cuvierina pacifica  |         |              |    |                                                                          |
| SSEO076-16   | Cuvierina pacifica  | Cuvierina pacifica  |         |              |    |                                                                          |
| SSEO072-16   | Cuvierina pacifica  | Cuvierina pacifica  |         |              |    |                                                                          |
| SSEO074-16   | Cuvierina pacifica  | Cuvierina pacifica  |         |              |    |                                                                          |
| QWEAS517-15  | Cypraea tigris      | Cypraea tigris      | Species | BOLD:AAD6059 | 9  | Cypraea tigris[8], Cypraea sp.[1]                                        |
| QWEAS518-15  | Cypraea tigris      | Cypraea tigris      |         |              |    |                                                                          |
| QWEAS1492-15 | Dosinia biscocta    | Dosinia biscocta    | Species | BOLD:AAO9163 | 19 | Dosinia fibula[10], Dosinia biscocta[4]                                  |
| QWEAS1491-15 | Dosinia biscocta    | Dosinia biscocta    |         |              |    |                                                                          |
| QWEAS1007-15 | Dosinia fibula      | Dosinia fibula      |         |              |    |                                                                          |
| QWEAS1010-15 | Dosinia fibula      | Dosinia fibula      |         |              |    |                                                                          |
| QWEAS1009-15 | Dosinia fibula      | Dosinia fibula      |         |              |    |                                                                          |
| QWEAS1008-15 | Dosinia fibula      | Dosinia fibula      |         |              |    |                                                                          |
| QWEAS1011-15 | Dosinia fibula      | Dosinia fibula      |         |              |    |                                                                          |
| SSEO1100-16  | Drupa albolabris    | Drupa albolabris    | Species | BOLD:ACB7183 | 14 | Drupa albolabris[12], Drupa ricinus[1]                                   |
| SSEO1101-16  | Drupa albolabris    | Drupa albolabris    |         |              |    |                                                                          |

|              |                                   |                                   |         |              |    |                                                                                                |
|--------------|-----------------------------------|-----------------------------------|---------|--------------|----|------------------------------------------------------------------------------------------------|
| SSEO1006-16  | <i>Echinolittorina reticulata</i> | <i>Echinolittorina reticulata</i> | Species | BOLD:AAA9391 | 61 | <i>Echinolittorina reticulata</i> [49],<br><i>Echinolittorina millegrana</i> [12]              |
| SSEO1003-16  | <i>Echinolittorina reticulata</i> | <i>Echinolittorina reticulata</i> |         |              |    |                                                                                                |
| SSEO1001-16  | <i>Echinolittorina reticulata</i> | <i>Echinolittorina reticulata</i> |         |              |    |                                                                                                |
| SSEO1009-16  | <i>Echinolittorina reticulata</i> | <i>Echinolittorina reticulata</i> |         |              |    |                                                                                                |
| SSEO1038-16  | <i>Echinolittorina reticulata</i> | <i>Echinolittorina reticulata</i> |         |              |    |                                                                                                |
| SSEO1004-16  | <i>Echinolittorina reticulata</i> | <i>Echinolittorina reticulata</i> |         |              |    |                                                                                                |
| SSEO1002-16  | <i>Echinolittorina reticulata</i> | <i>Echinolittorina reticulata</i> |         |              |    |                                                                                                |
| SSEO1007-16  | <i>Echinolittorina reticulata</i> | <i>Echinolittorina reticulata</i> |         |              |    |                                                                                                |
| SSEO1005-16  | <i>Echinolittorina reticulata</i> | <i>Echinolittorina reticulata</i> |         |              |    |                                                                                                |
| SSEO1008-16  | <i>Echinolittorina reticulata</i> | <i>Echinolittorina reticulata</i> |         |              |    |                                                                                                |
| SSEO1000-16  | <i>Echinolittorina reticulata</i> | <i>Echinolittorina reticulata</i> |         |              |    |                                                                                                |
| SSEO1039-16  | <i>Echinolittorina reticulata</i> | <i>Echinolittorina reticulata</i> |         |              |    |                                                                                                |
| QWEAS1600-15 | <i>Echinolittorina vidua</i>      | <i>Echinolittorina vidua</i>      | Species | BOLD:AAA4229 | 29 | <i>Echinolittorina vidua</i> [27],<br><i>Echinolittorina vidua B</i> [2]                       |
| QWEAS1596-15 | <i>Echinolittorina vidua</i>      | <i>Echinolittorina vidua</i>      |         |              |    |                                                                                                |
| QWEAS1599-15 | <i>Echinolittorina vidua</i>      | <i>Echinolittorina vidua</i>      |         |              |    |                                                                                                |
| QWEAS1597-15 | <i>Echinolittorina vidua</i>      | <i>Echinolittorina vidua</i>      |         |              |    |                                                                                                |
| QWEAS1601-15 | <i>Echinolittorina vidua</i>      | <i>Echinolittorina vidua</i>      |         |              |    |                                                                                                |
| QWEAS1598-15 | <i>Echinolittorina vidua</i>      | <i>Echinolittorina vidua</i>      |         |              |    |                                                                                                |
| SSEO170-16   | <i>Elysia abei</i>                | <i>Elysia abei</i>                | Species | BOLD:ACI2275 | 16 | <i>Elysia abei</i> [14], <i>Elysia amakusana</i> [2]                                           |
| SSEO167-16   | <i>Elysia abei</i>                | <i>Elysia abei</i>                |         |              |    |                                                                                                |
| SSEO171-16   | <i>Elysia abei</i>                | <i>Elysia abei</i>                |         |              |    |                                                                                                |
| SSEO168-16   | <i>Elysia abei</i>                | <i>Elysia abei</i>                |         |              |    |                                                                                                |
| SSEO166-16   | <i>Elysia abei</i>                | <i>Elysia abei</i>                |         |              |    |                                                                                                |
| SSEO169-16   | <i>Elysia abei</i>                | <i>Elysia abei</i>                |         |              |    |                                                                                                |
| SSEO174-16   | <i>Elysia amakusana</i>           | <i>Elysia amakusana</i>           |         |              |    |                                                                                                |
| SSEO210-16   | <i>Elysia atroviridis</i>         | <i>Elysia atroviridis</i>         | Species | BOLD:ACI2277 | 95 | <i>Elysia atroviridis</i> [92], <i>Elysia setoensis</i> [2], <i>Elysia cf. flavomacula</i> [1] |
| SSEO214-16   | <i>Elysia atroviridis</i>         | <i>Elysia atroviridis</i>         |         |              |    |                                                                                                |
| SSEO260-16   | <i>Elysia atroviridis</i>         | <i>Elysia atroviridis</i>         |         |              |    |                                                                                                |
| SSEO276-16   | <i>Elysia atroviridis</i>         | <i>Elysia atroviridis</i>         |         |              |    |                                                                                                |
| SSEO268-16   | <i>Elysia atroviridis</i>         | <i>Elysia atroviridis</i>         |         |              |    |                                                                                                |

|            |                    |                    |
|------------|--------------------|--------------------|
| SSEO237-16 | Elysia atroviridis | Elysia atroviridis |
| SSEO256-16 | Elysia atroviridis | Elysia atroviridis |
| SSEO233-16 | Elysia atroviridis | Elysia atroviridis |
| SSEO219-16 | Elysia atroviridis | Elysia atroviridis |
| SSEO262-16 | Elysia atroviridis | Elysia atroviridis |
| SSEO209-16 | Elysia atroviridis | Elysia atroviridis |
| SSEO273-16 | Elysia atroviridis | Elysia atroviridis |
| SSEO267-16 | Elysia atroviridis | Elysia atroviridis |
| SSEO231-16 | Elysia atroviridis | Elysia atroviridis |
| SSEO235-16 | Elysia atroviridis | Elysia atroviridis |
| SSEO217-16 | Elysia atroviridis | Elysia atroviridis |
| SSEO271-16 | Elysia atroviridis | Elysia atroviridis |
| SSEO281-16 | Elysia atroviridis | Elysia atroviridis |
| SSEO258-16 | Elysia atroviridis | Elysia atroviridis |
| SSEO251-16 | Elysia atroviridis | Elysia atroviridis |
| SSEO278-16 | Elysia atroviridis | Elysia atroviridis |
| SSEO245-16 | Elysia atroviridis | Elysia atroviridis |
| SSEO218-16 | Elysia atroviridis | Elysia atroviridis |
| SSEO223-16 | Elysia atroviridis | Elysia atroviridis |
| SSEO206-16 | Elysia atroviridis | Elysia atroviridis |
| SSEO227-16 | Elysia atroviridis | Elysia atroviridis |
| SSEO253-16 | Elysia atroviridis | Elysia atroviridis |
| SSEO247-16 | Elysia atroviridis | Elysia atroviridis |
| SSEO204-16 | Elysia atroviridis | Elysia atroviridis |
| SSEO229-16 | Elysia atroviridis | Elysia atroviridis |
| SSEO208-16 | Elysia atroviridis | Elysia atroviridis |
| SSEO266-16 | Elysia atroviridis | Elysia atroviridis |
| SSEO243-16 | Elysia atroviridis | Elysia atroviridis |
| SSEO225-16 | Elysia atroviridis | Elysia atroviridis |
| SSEO280-16 | Elysia atroviridis | Elysia atroviridis |

|             |                           |                           |         |              |    |                                                                                                      |
|-------------|---------------------------|---------------------------|---------|--------------|----|------------------------------------------------------------------------------------------------------|
| SSEO221-16  | <i>Elysia atroviridis</i> | <i>Elysia atroviridis</i> |         |              |    |                                                                                                      |
| SSEO277-16  | <i>Elysia atroviridis</i> | <i>Elysia atroviridis</i> |         |              |    |                                                                                                      |
| SSEO242-16  | <i>Elysia atroviridis</i> | <i>Elysia atroviridis</i> |         |              |    |                                                                                                      |
| SSEO246-16  | <i>Elysia atroviridis</i> | <i>Elysia atroviridis</i> |         |              |    |                                                                                                      |
| SSEO230-16  | <i>Elysia atroviridis</i> | <i>Elysia atroviridis</i> |         |              |    |                                                                                                      |
| SSEO232-16  | <i>Elysia atroviridis</i> | <i>Elysia atroviridis</i> |         |              |    |                                                                                                      |
| SSEO279-16  | <i>Elysia atroviridis</i> | <i>Elysia atroviridis</i> |         |              |    |                                                                                                      |
| SSEO244-16  | <i>Elysia atroviridis</i> | <i>Elysia atroviridis</i> |         |              |    |                                                                                                      |
| SSEO240-16  | <i>Elysia atroviridis</i> | <i>Elysia atroviridis</i> |         |              |    |                                                                                                      |
| SSEO249-16  | <i>Elysia atroviridis</i> | <i>Elysia atroviridis</i> |         |              |    |                                                                                                      |
| SSEO263-16  | <i>Elysia atroviridis</i> | <i>Elysia atroviridis</i> |         |              |    |                                                                                                      |
| SSEO172-16  | <i>Elysia setoensis</i>   | <i>Elysia setoensis</i>   |         |              |    |                                                                                                      |
| SSEO180-16  | <i>Elysia atroviridis</i> | <i>Elysia atroviridis</i> |         |              |    |                                                                                                      |
| SSEO183-16  | <i>Elysia ornata</i>      | <i>Elysia ornata</i>      | Species | BOLD:AAM5939 | 20 | <i>Elysia cf. marginata</i> 3 JV2013[12],<br><i>Elysia ornata</i> [7], <i>Elysia atroviridis</i> [1] |
| SSEO181-16  | <i>Elysia ornata</i>      | <i>Elysia ornata</i>      |         |              |    |                                                                                                      |
| SSEO184-16  | <i>Elysia ornata</i>      | <i>Elysia ornata</i>      | Species | BOLD:ACI0075 | 6  | <i>Elysia ornata</i> [4], <i>Elysia cf. marginata</i> [2]                                            |
| SSEO199-16  | <i>Elysia ornata</i>      | <i>Elysia ornata</i>      |         |              |    |                                                                                                      |
| SSEO182-16  | <i>Elysia ornata</i>      | <i>Elysia ornata</i>      | Species | BOLD:ACI0076 | 6  | <i>Elysia cf. marginata</i> [4], <i>Elysia ornata</i> [2]                                            |
| QWEAS516-15 | <i>Erronea erronea</i>    | <i>Erronea erronea</i>    | Species | BOLD:AAB7225 | 7  | <i>Erronea caurica</i> [5], <i>Erronea erronea</i> [2]                                               |
| QWEAS181-15 | <i>Euprymna berryi</i>    | <i>Euprymna berryi</i>    |         |              |    |                                                                                                      |
| QWEAS182-15 | <i>Euprymna berryi</i>    | <i>Euprymna berryi</i>    | Species | BOLD:AAC6030 | 15 | <i>Euprymna berryi</i> [8], <i>Euprymna hyllebergi</i> [4]                                           |
| QWEAS183-15 | <i>Euprymna berryi</i>    | <i>Euprymna berryi</i>    |         |              |    |                                                                                                      |
| QWEAS180-15 | <i>Euprymna berryi</i>    | <i>Euprymna berryi</i>    |         |              |    |                                                                                                      |
| QWEAS186-15 | <i>Euprymna morsei</i>    | <i>Euprymna morsei</i>    |         |              |    |                                                                                                      |
| QWEAS184-15 | <i>Euprymna morsei</i>    | <i>Euprymna morsei</i>    | Species | BOLD:AAJ0427 | 10 | <i>Euprymna morsei</i> [6], <i>Euprymna berryi</i> [1]                                               |
| QWEAS185-15 | <i>Euprymna morsei</i>    | <i>Euprymna morsei</i>    |         |              |    |                                                                                                      |
| QWEAS550-15 | <i>Ficus variegata</i>    | <i>Ficus variegata</i>    |         |              |    |                                                                                                      |
| QWEAS548-15 | <i>Ficus variegata</i>    | <i>Ficus variegata</i>    | Species | BOLD:ACB8356 | 6  | <i>Ficus variegata</i> Roding 1798[3],<br><i>Ficus variegata</i> [3]                                 |

|             |                              |                              |         |              |    |                                                                    |
|-------------|------------------------------|------------------------------|---------|--------------|----|--------------------------------------------------------------------|
| QWEAS549-15 | <i>Ficus variegata</i>       | <i>Ficus variegata</i>       |         |              |    |                                                                    |
| SSEO1423-16 | <i>Fusinus forceps</i>       | <i>Fusinus forceps</i>       | Species | BOLD:ACB7195 | 12 | <i>Fusinus forceps</i> [10], <i>Fusinus longicaudus</i> [2]        |
| SSEO1425-16 | <i>Fusinus forceps</i>       | <i>Fusinus forceps</i>       |         |              |    |                                                                    |
| SSEO1426-16 | <i>Fusinus forceps</i>       | <i>Fusinus forceps</i>       |         |              |    |                                                                    |
| SSEO1424-16 | <i>Fusinus forceps</i>       | <i>Fusinus forceps</i>       |         |              |    |                                                                    |
| SSEO1422-16 | <i>Fusinus forceps</i>       | <i>Fusinus forceps</i>       |         |              |    |                                                                    |
| SSEO1427-16 | <i>Fusinus longicaudus</i>   | <i>Fusinus longicaudus</i>   |         |              |    |                                                                    |
| SSEO679-16  | <i>Geloina erosa</i>         | <i>Geloina erosa</i>         | Species | BOLD:AA11140 | 3  | <i>Geloina erosa</i> [2], <i>Geloina expansa</i> [1]               |
| SSEO309-16  | <i>Gonatus berryi</i>        | <i>Gonatus berryi</i>        | Species | BOLD:ACH3990 | 4  | <i>Gonatus californiensis</i> [2], <i>Gonatus berryi</i> [2]       |
| SSEO307-16  | <i>Gonatus madokai</i>       | <i>Gonatus madokai</i>       | Species | BOLD:AAE3426 | 11 | <i>Gonatus madokai</i> [9], <i>Gonatus kamtschaticus</i> [2]       |
| SSEO311-16  | <i>Gonatus madokai</i>       | <i>Gonatus madokai</i>       |         |              |    |                                                                    |
| SSEO310-16  | <i>Gonatus madokai</i>       | <i>Gonatus madokai</i>       |         |              |    |                                                                    |
| SSEO325-16  | <i>Gonatus pyros</i>         | <i>Gonatus pyros</i>         | Species | BOLD:AAE3427 | 7  | <i>Gonatus pyros</i> [5], <i>Gonatus kamtschaticus</i> [2]         |
| SSEO302-16  | <i>Idiosepius biserialis</i> | <i>Idiosepius biserialis</i> | Species | BOLD:AAW9588 | 41 | <i>Idiosepius paradoxus</i> [35], <i>Idiosepius biserialis</i> [6] |
| SSEO300-16  | <i>Idiosepius biserialis</i> | <i>Idiosepius biserialis</i> |         |              |    |                                                                    |
| SSEO301-16  | <i>Idiosepius biserialis</i> | <i>Idiosepius biserialis</i> |         |              |    |                                                                    |
| SSEO299-16  | <i>Idiosepius paradoxus</i>  | <i>Idiosepius paradoxus</i>  |         |              |    |                                                                    |
| SSEO257-16  | <i>Idiosepius paradoxus</i>  | <i>Idiosepius paradoxus</i>  |         |              |    |                                                                    |
| SSEO282-16  | <i>Idiosepius paradoxus</i>  | <i>Idiosepius paradoxus</i>  |         |              |    |                                                                    |
| SSEO272-16  | <i>Idiosepius paradoxus</i>  | <i>Idiosepius paradoxus</i>  |         |              |    |                                                                    |
| SSEO287-16  | <i>Idiosepius paradoxus</i>  | <i>Idiosepius paradoxus</i>  |         |              |    |                                                                    |
| SSEO298-16  | <i>Idiosepius paradoxus</i>  | <i>Idiosepius paradoxus</i>  |         |              |    |                                                                    |
| SSEO269-16  | <i>Idiosepius paradoxus</i>  | <i>Idiosepius paradoxus</i>  |         |              |    |                                                                    |
| SSEO270-16  | <i>Idiosepius paradoxus</i>  | <i>Idiosepius paradoxus</i>  |         |              |    |                                                                    |
| SSEO275-16  | <i>Idiosepius paradoxus</i>  | <i>Idiosepius paradoxus</i>  |         |              |    |                                                                    |
| SSEO295-16  | <i>Idiosepius paradoxus</i>  | <i>Idiosepius paradoxus</i>  |         |              |    |                                                                    |
| SSEO297-16  | <i>Idiosepius paradoxus</i>  | <i>Idiosepius paradoxus</i>  |         |              |    |                                                                    |

|             |                               |                               |         |              |    |                                                                                                                                 |
|-------------|-------------------------------|-------------------------------|---------|--------------|----|---------------------------------------------------------------------------------------------------------------------------------|
| SSEO274-16  | <i>Idiosepius paradoxus</i>   | <i>Idiosepius paradoxus</i>   |         |              |    |                                                                                                                                 |
| SSEO286-16  | <i>Idiosepius paradoxus</i>   | <i>Idiosepius paradoxus</i>   |         |              |    |                                                                                                                                 |
| SSEO284-16  | <i>Idiosepius paradoxus</i>   | <i>Idiosepius paradoxus</i>   |         |              |    |                                                                                                                                 |
| SSEO291-16  | <i>Idiosepius paradoxus</i>   | <i>Idiosepius paradoxus</i>   |         |              |    |                                                                                                                                 |
| SSEO294-16  | <i>Idiosepius paradoxus</i>   | <i>Idiosepius paradoxus</i>   |         |              |    |                                                                                                                                 |
| SSEO293-16  | <i>Idiosepius paradoxus</i>   | <i>Idiosepius paradoxus</i>   |         |              |    |                                                                                                                                 |
| SSEO783-16  | <i>Isognomon acutirostris</i> | <i>Isognomon acutirostris</i> | Species | BOLD:AAW9229 | 3  | <i>Isognomon acutirostris</i> [2],<br><i>Isognomon nucleus</i> [1]                                                              |
| QWEAS875-15 | <i>Isognomon nucleus</i>      | <i>Isognomon nucleus</i>      |         |              |    |                                                                                                                                 |
| SSEO784-16  | <i>Isognomon perna</i>        | <i>Isognomon perna</i>        | Species | BOLD:AAW9227 | 6  | <i>Isognomon perna</i> [4], <i>Isognomon</i><br><i>sp.</i> [2]                                                                  |
| QWEAS866-15 | <i>Isognomon perna</i>        | <i>Isognomon perna</i>        |         |              |    |                                                                                                                                 |
| QWEAS867-15 | <i>Isognomon perna</i>        | <i>Isognomon perna</i>        |         |              |    |                                                                                                                                 |
| SSEO843-16  | <i>Lepeta caeca pacifica</i>  | <i>Lepeta caeca pacifica</i>  | Species | BOLD:AAX5488 | 4  | <i>Lepeta caeca pacifica</i> [3], <i>Lepeta</i><br><i>caeca</i> [1]                                                             |
| SSEO842-16  | <i>Lepeta caeca pacifica</i>  | <i>Lepeta caeca pacifica</i>  |         |              |    |                                                                                                                                 |
| SSEO1014-16 | <i>Littoraria coccinea</i>    | <i>Littoraria coccinea</i>    | Species | BOLD:AAU1059 | 19 | <i>Littoraria coccinea glabrata</i> [8],<br><i>Littoraria glabrata</i> [7], <i>Littoraria</i><br><i>coccinea</i> [3]            |
| QWEAS524-15 | <i>Littoraria intermedia</i>  | <i>Littoraria intermedia</i>  | Species | BOLD:ACB7473 | 5  | <i>Littoraria intermedia</i> [4], <i>Littoraria</i><br><i>articulata</i> [1]                                                    |
| QWEAS525-15 | <i>Littoraria intermedia</i>  | <i>Littoraria intermedia</i>  |         |              |    |                                                                                                                                 |
| SSEO981-16  | <i>Littoraria pintado</i>     | <i>Littoraria pintado</i>     | Species | BOLD:AAX6439 | 8  | <i>Littoraria pintado</i> [3], <i>Littoraria</i><br><i>pintado pintado</i> [3], <i>Littoraria</i><br><i>pintado pullata</i> [2] |
| QWEAS557-15 | <i>Littoraria scabra</i>      | <i>Littoraria scabra</i>      | Species | BOLD:ACB7955 | 4  | <i>Littoraria scabra</i> [2], <i>Littoraria</i><br><i>ardouiniana</i> [2]                                                       |
| QWEAS125-15 | <i>Loliolus japonicus</i>     | <i>Loliolus japonicus</i>     | Species | BOLD:AAX6339 | 20 | <i>Loliolus japonicus</i> [19], <i>Loliolus</i><br><i>beka</i> [1]                                                              |
| QWEAS128-15 | <i>Loliolus japonicus</i>     | <i>Loliolus japonicus</i>     |         |              |    |                                                                                                                                 |
| QWEAS126-15 | <i>Loliolus japonicus</i>     | <i>Loliolus japonicus</i>     |         |              |    |                                                                                                                                 |
| QWEAS129-15 | <i>Loliolus japonicus</i>     | <i>Loliolus japonicus</i>     |         |              |    |                                                                                                                                 |
| QWEAS130-15 | <i>Loliolus japonicus</i>     | <i>Loliolus japonicus</i>     |         |              |    |                                                                                                                                 |
| QWEAS127-15 | <i>Loliolus japonicus</i>     | <i>Loliolus japonicus</i>     |         |              |    |                                                                                                                                 |
| SSEO1307-16 | <i>Lunella cinerea</i>        | <i>Lunella cinerea</i>        | Species | BOLD:AAD3795 | 45 | <i>Lunella sp. ciwp</i> [14], <i>Lunella</i>                                                                                    |

|              |                         |                         |         |              |     |                                                            |
|--------------|-------------------------|-------------------------|---------|--------------|-----|------------------------------------------------------------|
| SSEO1308-16  | Lunella cinerea         | Lunella cinerea         |         |              |     | cinerea[11]                                                |
| SSEO1309-16  | Lunella cinerea         | Lunella cinerea         |         |              |     |                                                            |
| SSEO1313-16  | Lunella coronata        | Lunella coronata        | Species | BOLD:AAD3503 | 141 | Lunella granulata[134], Lunella coronata[7]                |
| SSEO1311-16  | Lunella coronata        | Lunella coronata        |         |              |     |                                                            |
| SSEO1310-16  | Lunella coronata        | Lunella coronata        |         |              |     |                                                            |
| SSEO1270-16  | Lunella granulata       | Lunella granulata       |         |              |     |                                                            |
| SSEO1274-16  | Lunella granulata       | Lunella granulata       |         |              |     |                                                            |
| SSEO1271-16  | Lunella granulata       | Lunella granulata       |         |              |     |                                                            |
| QWEAS1602-15 | Lunella granulata       | Lunella granulata       |         |              |     |                                                            |
| QWEAS1142-15 | Macridiscus aequilatera | Macridiscus aequilatera | Species | BOLD:AAO8015 | 43  | Macridiscus multifarius[22],<br>Macridiscus aequilatera[7] |
| QWEAS1143-15 | Macridiscus aequilatera | Macridiscus aequilatera |         |              |     |                                                            |
| QWEAS1147-15 | Macridiscus aequilatera | Macridiscus aequilatera |         |              |     |                                                            |
| QWEAS1144-15 | Macridiscus aequilatera | Macridiscus aequilatera |         |              |     |                                                            |
| QWEAS1141-15 | Macridiscus aequilatera | Macridiscus aequilatera |         |              |     |                                                            |
| QWEAS1146-15 | Macridiscus aequilatera | Macridiscus aequilatera |         |              |     |                                                            |
| QWEAS1145-15 | Macridiscus aequilatera | Macridiscus aequilatera |         |              |     |                                                            |
| QWEAS1415-15 | Macridiscus multifarius | Macridiscus multifarius |         |              |     |                                                            |
| QWEAS1419-15 | Macridiscus multifarius | Macridiscus multifarius |         |              |     |                                                            |
| QWEAS1414-15 | Macridiscus multifarius | Macridiscus multifarius |         |              |     |                                                            |
| QWEAS1420-15 | Macridiscus multifarius | Macridiscus multifarius |         |              |     |                                                            |
| QWEAS1417-15 | Macridiscus multifarius | Macridiscus multifarius |         |              |     |                                                            |
| QWEAS1416-15 | Macridiscus multifarius | Macridiscus multifarius |         |              |     |                                                            |
| QWEAS1418-15 | Macridiscus multifarius | Macridiscus multifarius |         |              |     |                                                            |
| QWEAS1421-15 | Macridiscus multifarius | Macridiscus multifarius |         |              |     |                                                            |
| QWEAS1403-15 | Meretrix lusoria        | Meretrix lusoria        |         |              |     |                                                            |
| QWEAS1406-15 | Meretrix lusoria        | Meretrix lusoria        |         |              |     |                                                            |
| QWEAS1404-15 | Meretrix lusoria        | Meretrix lusoria        |         |              |     |                                                            |
| QWEAS1446-15 | Meretrix meretrix       | Meretrix meretrix       |         |              |     |                                                            |
| QWEAS1413-15 | Meretrix petechialis    | Meretrix petechialis    |         |              |     |                                                            |
| QWEAS1411-15 | Meretrix petechialis    | Meretrix petechialis    |         |              |     |                                                            |

|              |                      |                      |         |              |    |                                                |
|--------------|----------------------|----------------------|---------|--------------|----|------------------------------------------------|
| QWEAS1051-15 | Meretrix petechialis | Meretrix petechialis |         |              |    |                                                |
| QWEAS1057-15 | Meretrix petechialis | Meretrix petechialis |         |              |    |                                                |
| QWEAS1062-15 | Meretrix petechialis | Meretrix petechialis |         |              |    |                                                |
| QWEAS1055-15 | Meretrix petechialis | Meretrix petechialis |         |              |    |                                                |
| QWEAS1059-15 | Meretrix petechialis | Meretrix petechialis |         |              |    |                                                |
| QWEAS1060-15 | Meretrix petechialis | Meretrix petechialis |         |              |    |                                                |
| QWEAS1049-15 | Meretrix petechialis | Meretrix petechialis |         |              |    |                                                |
| QWEAS1048-15 | Meretrix petechialis | Meretrix petechialis |         |              |    |                                                |
| QWEAS1061-15 | Meretrix petechialis | Meretrix petechialis |         |              |    |                                                |
| QWEAS1054-15 | Meretrix petechialis | Meretrix petechialis |         |              |    |                                                |
| QWEAS1058-15 | Meretrix petechialis | Meretrix petechialis |         |              |    |                                                |
| QWEAS1050-15 | Meretrix petechialis | Meretrix petechialis |         |              |    |                                                |
| QWEAS1053-15 | Meretrix petechialis | Meretrix petechialis |         |              |    |                                                |
| QWEAS1052-15 | Meretrix petechialis | Meretrix petechialis |         |              |    |                                                |
| QWEAS1056-15 | Meretrix petechialis | Meretrix petechialis |         |              |    |                                                |
| QWEAS1407-15 | Meretrix lyrata      | Meretrix lyrata      |         |              |    |                                                |
| QWEAS1409-15 | Meretrix lyrata      | Meretrix lyrata      |         |              |    |                                                |
| QWEAS1068-15 | Meretrix lyrata      | Meretrix lyrata      |         |              |    |                                                |
| QWEAS1070-15 | Meretrix lyrata      | Meretrix lyrata      |         |              |    |                                                |
| QWEAS1072-15 | Meretrix lyrata      | Meretrix lyrata      |         |              |    |                                                |
| QWEAS1069-15 | Meretrix lyrata      | Meretrix lyrata      |         |              |    |                                                |
| QWEAS1071-15 | Meretrix lyrata      | Meretrix lyrata      |         |              |    |                                                |
| QWEAS1073-15 | Meretrix lyrata      | Meretrix lyrata      |         |              |    |                                                |
| QWEAS1067-15 | Meretrix lyrata      | Meretrix lyrata      |         |              |    |                                                |
| QWEAS1408-15 | Meretrix lyrata      | Meretrix lyrata      |         |              |    |                                                |
| QWEAS1445-15 | Meretrix meretrix    | Meretrix meretrix    |         |              |    |                                                |
| QWEAS1443-15 | Meretrix meretrix    | Meretrix meretrix    |         |              |    |                                                |
| QWEAS1036-15 | Meretrix meretrix    | Meretrix meretrix    |         |              |    |                                                |
| QWEAS1038-15 | Meretrix meretrix    | Meretrix meretrix    |         |              |    |                                                |
| QWEAS1035-15 | Meretrix meretrix    | Meretrix meretrix    |         |              |    |                                                |
|              |                      |                      | Species | BOLD:AAH7529 | 45 | Meretrix lyrata[42], Meretrix lamarckii[1]     |
|              |                      |                      | Species | BOLD:AAO5535 | 26 | Meretrix meretrix[25], Meretrix sp. YD-2011[1] |



|              |                              |                              |         |              |     |                                                                               |
|--------------|------------------------------|------------------------------|---------|--------------|-----|-------------------------------------------------------------------------------|
| QWEAS1034-15 | <i>Meretrix meretrix</i>     | <i>Meretrix meretrix</i>     |         |              |     |                                                                               |
| QWEAS1037-15 | <i>Meretrix meretrix</i>     | <i>Meretrix meretrix</i>     |         |              |     |                                                                               |
| SSEO1448-16  | <i>Mitrella bicincta</i>     | <i>Mitrella bicincta</i>     | Species | BOLD:ACB6970 | 18  | <i>Mitrella bicincta</i> [16], <i>Mitrella cf. tuberosa</i> [2]               |
| SSEO1441-16  | <i>Mitrella bicincta</i>     | <i>Mitrella bicincta</i>     |         |              |     |                                                                               |
| SSEO1444-16  | <i>Mitrella bicincta</i>     | <i>Mitrella bicincta</i>     |         |              |     |                                                                               |
| SSEO1449-16  | <i>Mitrella bicincta</i>     | <i>Mitrella bicincta</i>     |         |              |     |                                                                               |
| SSEO1442-16  | <i>Mitrella bicincta</i>     | <i>Mitrella bicincta</i>     |         |              |     |                                                                               |
| SSEO1447-16  | <i>Mitrella bicincta</i>     | <i>Mitrella bicincta</i>     |         |              |     |                                                                               |
| SSEO1445-16  | <i>Mitrella bicincta</i>     | <i>Mitrella bicincta</i>     |         |              |     |                                                                               |
| SSEO1440-16  | <i>Mitrella bicincta</i>     | <i>Mitrella bicincta</i>     |         |              |     |                                                                               |
| QWEAS264-15  | <i>Mitrella cf. tuberosa</i> | <i>Mitrella cf. tuberosa</i> |         |              |     |                                                                               |
| QWEAS265-15  | <i>Mitrella cf. tuberosa</i> | <i>Mitrella cf. tuberosa</i> |         |              |     |                                                                               |
| QWEAS065-15  | <i>Modiolus comptus</i>      | <i>Modiolus comptus</i>      | Species | BOLD:AAX4596 | 10  | <i>Modiolus comptus</i> [8], <i>Modiolus nipponicus</i> [2]                   |
| QWEAS064-15  | <i>Modiolus comptus</i>      | <i>Modiolus comptus</i>      |         |              |     |                                                                               |
| QWEAS063-15  | <i>Modiolus comptus</i>      | <i>Modiolus comptus</i>      |         |              |     |                                                                               |
| QWEAS066-15  | <i>Modiolus comptus</i>      | <i>Modiolus comptus</i>      |         |              |     |                                                                               |
| SSEO461-16   | <i>Modiolus nipponicus</i>   | <i>Modiolus nipponicus</i>   |         |              |     |                                                                               |
| SSEO825-16   | <i>Monodonta perplexa</i>    | <i>Monodonta perplexa</i>    | Species | BOLD:AAX4757 | 5   | <i>Monodonta neritoides</i> [3],<br><i>Monodonta perplexa</i> [2]             |
| QWEAS288-15  | <i>Morula granulata</i>      | <i>Morula granulata</i>      | Species | BOLD:ACH7783 | 6   | <i>Morula granulata</i> [5], <i>Morula ceylonica</i> [1]                      |
| QWEAS287-15  | <i>Morula granulata</i>      | <i>Morula granulata</i>      |         |              |     |                                                                               |
| QWEAS290-15  | <i>Morula granulata</i>      | <i>Morula granulata</i>      |         |              |     |                                                                               |
| QWEAS289-15  | <i>Morula granulata</i>      | <i>Morula granulata</i>      |         |              |     |                                                                               |
| SSEO1128-16  | <i>Morula zebrina</i>        | <i>Morula zebrina</i>        | Species | BOLD:ACH7627 | 10  | <i>Morula uva</i> [4], <i>Morula zebrina</i> [2],<br><i>Morula aspera</i> [1] |
| QWEAS039-15  | <i>Mytilus coruscus</i>      | <i>Mytilus coruscus</i>      | Species | BOLD:AAB1503 | 133 | <i>Mytilus coruscus</i> [115], <i>Mytilus galloprovincialis</i> [16]          |
| QWEAS043-15  | <i>Mytilus coruscus</i>      | <i>Mytilus coruscus</i>      |         |              |     |                                                                               |
| QWEAS040-15  | <i>Mytilus coruscus</i>      | <i>Mytilus coruscus</i>      |         |              |     |                                                                               |
| QWEAS042-15  | <i>Mytilus coruscus</i>      | <i>Mytilus coruscus</i>      |         |              |     |                                                                               |
| QWEAS041-15  | <i>Mytilus coruscus</i>      | <i>Mytilus coruscus</i>      |         |              |     |                                                                               |

|              |                           |                           |         |              |     |                                                                                                                                                                                                                                                                                                                                                                                                                                                                                                                                                                                             |
|--------------|---------------------------|---------------------------|---------|--------------|-----|---------------------------------------------------------------------------------------------------------------------------------------------------------------------------------------------------------------------------------------------------------------------------------------------------------------------------------------------------------------------------------------------------------------------------------------------------------------------------------------------------------------------------------------------------------------------------------------------|
| QWEAS044-15  | Mytilus coruscus          | Mytilus coruscus          |         |              |     |                                                                                                                                                                                                                                                                                                                                                                                                                                                                                                                                                                                             |
| QWEAS045-15  | Mytilus coruscus          | Mytilus coruscus          |         |              |     |                                                                                                                                                                                                                                                                                                                                                                                                                                                                                                                                                                                             |
| SSEO1465-16  | Mytilus galloprovincialis | Mytilus galloprovincialis |         |              |     |                                                                                                                                                                                                                                                                                                                                                                                                                                                                                                                                                                                             |
| SSEO1459-16  | Mytilus galloprovincialis | Mytilus galloprovincialis |         |              |     |                                                                                                                                                                                                                                                                                                                                                                                                                                                                                                                                                                                             |
| SSEO1461-16  | Mytilus galloprovincialis | Mytilus galloprovincialis |         |              |     |                                                                                                                                                                                                                                                                                                                                                                                                                                                                                                                                                                                             |
| SSEO1460-16  | Mytilus galloprovincialis | Mytilus galloprovincialis |         |              |     |                                                                                                                                                                                                                                                                                                                                                                                                                                                                                                                                                                                             |
| SSEO1463-16  | Mytilus galloprovincialis | Mytilus galloprovincialis |         |              |     |                                                                                                                                                                                                                                                                                                                                                                                                                                                                                                                                                                                             |
| SSEO1458-16  | Mytilus galloprovincialis | Mytilus galloprovincialis |         |              |     |                                                                                                                                                                                                                                                                                                                                                                                                                                                                                                                                                                                             |
| SSEO1462-16  | Mytilus galloprovincialis | Mytilus galloprovincialis |         |              |     |                                                                                                                                                                                                                                                                                                                                                                                                                                                                                                                                                                                             |
| SSEO1464-16  | Mytilus galloprovincialis | Mytilus galloprovincialis |         |              |     |                                                                                                                                                                                                                                                                                                                                                                                                                                                                                                                                                                                             |
| SSEO1457-16  | Mytilus edulis            | Mytilus edulis            |         |              |     |                                                                                                                                                                                                                                                                                                                                                                                                                                                                                                                                                                                             |
| QWEAS037-15  | Mytilus galloprovincialis | Mytilus galloprovincialis |         |              |     |                                                                                                                                                                                                                                                                                                                                                                                                                                                                                                                                                                                             |
| QWEAS031-15  | Mytilus galloprovincialis | Mytilus galloprovincialis |         |              |     |                                                                                                                                                                                                                                                                                                                                                                                                                                                                                                                                                                                             |
| QWEAS034-15  | Mytilus galloprovincialis | Mytilus galloprovincialis |         |              |     |                                                                                                                                                                                                                                                                                                                                                                                                                                                                                                                                                                                             |
| QWEAS038-15  | Mytilus galloprovincialis | Mytilus galloprovincialis |         |              |     |                                                                                                                                                                                                                                                                                                                                                                                                                                                                                                                                                                                             |
| QWEAS032-15  | Mytilus galloprovincialis | Mytilus galloprovincialis |         |              |     |                                                                                                                                                                                                                                                                                                                                                                                                                                                                                                                                                                                             |
| QWEAS036-15  | Mytilus galloprovincialis | Mytilus galloprovincialis |         |              |     |                                                                                                                                                                                                                                                                                                                                                                                                                                                                                                                                                                                             |
| QWEAS033-15  | Mytilus galloprovincialis | Mytilus galloprovincialis |         |              |     |                                                                                                                                                                                                                                                                                                                                                                                                                                                                                                                                                                                             |
| QWEAS035-15  | Mytilus galloprovincialis | Mytilus galloprovincialis | Species | BOLD:AAA2184 | 550 | Mytilus galloprovincialis[285], Mytilus edulis[121], Mytilus sp. 2[69], Mytilus trossulus[19], Mytilus sp.[7], Mytilus sp. CHLF1[1], Mytilus sp. CHGF6[1], Mytilus sp. CHGF5[1], Mytilus sp. CHLF2[1], Mytilus sp. CHLF5[1], Mytilus sp. WHBF2[1], Mytilus sp. CHLF6[1], Mytilus sp. CHGF4[1], Mytilus sp. CHLF4[1], Mytilus sp. CHLF3[1], Mytilus sp. CHGF1[1], Mytilus sp. AFRF4[1], Mytilus sp. AFRF3[1], Mytilus sp. AFRF2[1], Mytilus sp. AFRF1[1], Mytilus sp. AUSF1[1], Mytilus sp. AUSF2[1], Mytilus sp. CHGF2[1], Mytilus sp. AUSF4[1], Mytilus sp. AUSF3[1], Mytilus sp. CHGF3[1] |
| QWEAS1565-15 | Nassarius dorsatus        | Nassarius dorsatus        | Species | BOLD:ACB6997 | 5   | Nassarius dorsatus[4], Nassarius sufflatus[1]                                                                                                                                                                                                                                                                                                                                                                                                                                                                                                                                               |
| QWEAS1566-15 | Nassarius dorsatus        | Nassarius dorsatus        |         |              |     |                                                                                                                                                                                                                                                                                                                                                                                                                                                                                                                                                                                             |

|              |                          |                          |         |              |     |                                                                                     |
|--------------|--------------------------|--------------------------|---------|--------------|-----|-------------------------------------------------------------------------------------|
| QWEAS298-15  | Nassarius hepaticus      | Nassarius hepaticus      | Species | BOLD:AAB3092 | 62  | Nassarius hepaticus[60], Nassarius festivus[2]                                      |
| QWEAS300-15  | Nassarius hepaticus      | Nassarius hepaticus      |         |              |     |                                                                                     |
| QWEAS299-15  | Nassarius hepaticus      | Nassarius hepaticus      |         |              |     |                                                                                     |
| QWEAS297-15  | Nassarius hepaticus      | Nassarius hepaticus      |         |              |     |                                                                                     |
| QWEAS302-15  | Nassarius hepaticus      | Nassarius hepaticus      |         |              |     |                                                                                     |
| QWEAS301-15  | Nassarius hepaticus      | Nassarius hepaticus      |         |              |     |                                                                                     |
| SSEO1141-16  | Neptunea arthritica      | Neptunea arthritica      | Species | BOLD:AAC0450 | 10  | Neptunea arthritica[7], Neptunea cumingi[3]                                         |
| SSEO1139-16  | Neptunea arthritica      | Neptunea arthritica      |         |              |     |                                                                                     |
| SSEO1140-16  | Neptunea arthritica      | Neptunea arthritica      |         |              |     |                                                                                     |
| SSEO1373-16  | Neptunea frater          | Neptunea frater          | Species | BOLD:AAF4517 | 12  | Neptunea frater[9], Neptunea kuroshio[3]                                            |
| SSEO1156-16  | Neptunea frater          | Neptunea frater          |         |              |     |                                                                                     |
| SSEO1157-16  | Neptunea frater          | Neptunea frater          |         |              |     |                                                                                     |
| SSEO1160-16  | Neptunea kuroshio        | Neptunea kuroshio        |         |              |     |                                                                                     |
| SSEO1158-16  | Neptunea intersculpta    | Neptunea intersculpta    | Species | BOLD:AAM4420 | 5   | Neptunea intersculpta[4], Neptunea constricta[1]                                    |
| SSEO1159-16  | Neptunea intersculpta    | Neptunea intersculpta    |         |              |     |                                                                                     |
| SSEO466-16   | Neritina petiti          | Neritina petiti          | Species | BOLD:AAM1170 | 11  | Neritina petiti[8], Neritina canalis[1]                                             |
| SSEO468-16   | Neritina petiti          | Neritina petiti          |         |              |     |                                                                                     |
| SSEO464-16   | Neritina petiti          | Neritina petiti          |         |              |     |                                                                                     |
| QWEAS459-15  | Nipponacmea concinna     | Nipponacmea concinna     | Species | BOLD:ACS5305 | 45  | Nipponacmea nigrans[42], Nipponacmea concinna[3]                                    |
| QWEAS1610-15 | Nipponacmea nigrans      | Nipponacmea nigrans      |         |              |     |                                                                                     |
| QWEAS1611-15 | Nipponacmea nigrans      | Nipponacmea nigrans      |         |              |     |                                                                                     |
| QWEAS1609-15 | Nipponacmea nigrans      | Nipponacmea nigrans      |         |              |     |                                                                                     |
| QWEAS1612-15 | Nipponacmea nigrans      | Nipponacmea nigrans      |         |              |     |                                                                                     |
| QWEAS1608-15 | Nipponacmea nigrans      | Nipponacmea nigrans      |         |              |     |                                                                                     |
| QWEAS1603-15 | Nipponacmea fuscoviridis | Nipponacmea fuscoviridis | Species | BOLD:ACS4711 | 163 | Nipponacmea fuscoviridis[157], Nipponacmea sp. JL2014[3], Nipponacmea schrenckii[3] |
| QWEAS1605-15 | Nipponacmea fuscoviridis | Nipponacmea fuscoviridis |         |              |     |                                                                                     |
| QWEAS1607-15 | Nipponacmea fuscoviridis | Nipponacmea fuscoviridis |         |              |     |                                                                                     |

|              |                          |                          |         |              |     |                                                       |
|--------------|--------------------------|--------------------------|---------|--------------|-----|-------------------------------------------------------|
| QWEAS1606-15 | Nipponacmea fuscoviridis | Nipponacmea fuscoviridis |         |              |     |                                                       |
| QWEAS1604-15 | Nipponacmea fuscoviridis | Nipponacmea fuscoviridis |         |              |     |                                                       |
| QWEAS1614-15 | Nipponacmea radula       | Nipponacmea radula       | Species | BOLD:AAX6432 | 113 | Nipponacmea radula[92],<br>Nipponacmea schrenckii[21] |
| QWEAS1615-15 | Nipponacmea radula       | Nipponacmea radula       |         |              |     |                                                       |
| QWEAS1617-15 | Nipponacmea radula       | Nipponacmea radula       |         |              |     |                                                       |
| QWEAS1613-15 | Nipponacmea radula       | Nipponacmea radula       |         |              |     |                                                       |
| QWEAS1616-15 | Nipponacmea radula       | Nipponacmea radula       |         |              |     |                                                       |
| SSEO541-16   | Nipponacmea radula       | Nipponacmea radula       |         |              |     |                                                       |
| QWEAS448-15  | Nipponacmea schrenckii   | Nipponacmea schrenckii   |         |              |     |                                                       |
| QWEAS450-15  | Nipponacmea schrenckii   | Nipponacmea schrenckii   |         |              |     |                                                       |
| QWEAS451-15  | Nipponacmea schrenckii   | Nipponacmea schrenckii   |         |              |     |                                                       |
| QWEAS449-15  | Nipponacmea schrenckii   | Nipponacmea schrenckii   |         |              |     |                                                       |
| QWEAS447-15  | Nipponacmea schrenckii   | Nipponacmea schrenckii   |         |              |     |                                                       |
| QWEAS446-15  | Nipponacmea schrenckii   | Nipponacmea schrenckii   |         |              |     |                                                       |
| SSEO337-16   | Octopus cyanea           | Octopus cyanea           | Species | BOLD:AAF4471 | 21  | Octopus cyanea[11], Octopus sp.[8], Octopus bocki[1]  |
| SSEO338-16   | Octopus cyanea           | Octopus cyanea           |         |              |     |                                                       |
| QWEAS1108-15 | Paphia gallus            | Paphia gallus            | Species | BOLD:AAK5288 | 55  | Paphia gallus[38], Paphia exarata[1]                  |
| QWEAS1110-15 | Paphia gallus            | Paphia gallus            |         |              |     |                                                       |
| QWEAS1395-15 | Paphia gallus            | Paphia gallus            |         |              |     |                                                       |
| QWEAS1390-15 | Paphia gallus            | Paphia gallus            |         |              |     |                                                       |
| QWEAS1398-15 | Paphia gallus            | Paphia gallus            |         |              |     |                                                       |
| QWEAS1397-15 | Paphia gallus            | Paphia gallus            |         |              |     |                                                       |
| QWEAS1392-15 | Paphia gallus            | Paphia gallus            |         |              |     |                                                       |
| QWEAS1401-15 | Paphia gallus            | Paphia gallus            |         |              |     |                                                       |
| QWEAS1391-15 | Paphia gallus            | Paphia gallus            |         |              |     |                                                       |
| QWEAS1399-15 | Paphia gallus            | Paphia gallus            |         |              |     |                                                       |
| QWEAS1400-15 | Paphia gallus            | Paphia gallus            |         |              |     |                                                       |
| QWEAS1394-15 | Paphia gallus            | Paphia gallus            |         |              |     |                                                       |

|              |                                   |                                   |         |              |    |                                                                        |
|--------------|-----------------------------------|-----------------------------------|---------|--------------|----|------------------------------------------------------------------------|
| QWEAS1402-15 | <i>Paphia gallus</i>              | <i>Paphia gallus</i>              |         |              |    |                                                                        |
| QWEAS1396-15 | <i>Paphia gallus</i>              | <i>Paphia gallus</i>              |         |              |    |                                                                        |
| QWEAS1393-15 | <i>Paphia gallus</i>              | <i>Paphia gallus</i>              |         |              |    |                                                                        |
| QWEAS1229-15 | <i>Paphia gallus</i>              | <i>Paphia gallus</i>              |         |              |    |                                                                        |
| QWEAS1228-15 | <i>Paphia gallus</i>              | <i>Paphia gallus</i>              |         |              |    |                                                                        |
| QWEAS1109-15 | <i>Paphia gallus</i>              | <i>Paphia gallus</i>              |         |              |    |                                                                        |
| QWEAS1230-15 | <i>Paphia gallus</i>              | <i>Paphia gallus</i>              |         |              |    |                                                                        |
| QWEAS1111-15 | <i>Paphia textile</i>             | <i>Paphia textile</i>             | Species | BOLD:AAO8673 | 12 | <i>Paphia textile</i> [6], <i>Paphia undulata</i> [2]                  |
| QWEAS1112-15 | <i>Paphia textile</i>             | <i>Paphia textile</i>             |         |              |    |                                                                        |
| QWEAS1466-15 | <i>Paphia textile</i>             | <i>Paphia textile</i>             |         |              |    |                                                                        |
| QWEAS1468-15 | <i>Paphia undulata</i>            | <i>Paphia undulata</i>            |         |              |    |                                                                        |
| QWEAS440-15  | <i>Patelloida pygmaea</i>         | <i>Patelloida pygmaea</i>         | Species | BOLD:ACB8437 | 19 | <i>Patelloida pygmaea</i> [9], <i>Patelloida conulus</i> [9]           |
| QWEAS442-15  | <i>Patelloida pygmaea</i>         | <i>Patelloida pygmaea</i>         |         |              |    |                                                                        |
| QWEAS439-15  | <i>Patelloida pygmaea</i>         | <i>Patelloida pygmaea</i>         |         |              |    |                                                                        |
| QWEAS441-15  | <i>Patelloida pygmaea</i>         | <i>Patelloida pygmaea</i>         |         |              |    |                                                                        |
| QWEAS435-15  | <i>Patelloida pygmaea</i>         | <i>Patelloida pygmaea</i>         |         |              |    |                                                                        |
| QWEAS438-15  | <i>Patelloida pygmaea</i>         | <i>Patelloida pygmaea</i>         |         |              |    |                                                                        |
| QWEAS437-15  | <i>Patelloida pygmaea</i>         | <i>Patelloida pygmaea</i>         |         |              |    |                                                                        |
| QWEAS436-15  | <i>Patelloida pygmaea</i>         | <i>Patelloida pygmaea</i>         |         |              |    |                                                                        |
| QWEAS443-15  | <i>Patelloida pygmaea</i>         | <i>Patelloida pygmaea</i>         |         |              |    |                                                                        |
| QWEAS455-15  | <i>Patelloida saccharina lanx</i> | <i>Patelloida saccharina lanx</i> | Species | BOLD:AAE7072 | 15 | <i>Patelloida saccharina lanx</i> [14], <i>Patelloida sp.</i> ESU 1[1] |
| QWEAS453-15  | <i>Patelloida saccharina lanx</i> | <i>Patelloida saccharina lanx</i> |         |              |    |                                                                        |
| QWEAS456-15  | <i>Patelloida saccharina lanx</i> | <i>Patelloida saccharina lanx</i> |         |              |    |                                                                        |
| QWEAS458-15  | <i>Patelloida saccharina lanx</i> | <i>Patelloida saccharina lanx</i> |         |              |    |                                                                        |
| QWEAS452-15  | <i>Patelloida saccharina lanx</i> | <i>Patelloida saccharina lanx</i> |         |              |    |                                                                        |

|              |                            |                            |         |              |    |                                                  |
|--------------|----------------------------|----------------------------|---------|--------------|----|--------------------------------------------------|
| QWEAS454-15  | Patelloida saccharina lanx | Patelloida saccharina lanx |         |              |    |                                                  |
| QWEAS457-15  | Patelloida saccharina lanx | Patelloida saccharina lanx |         |              |    |                                                  |
| QWEAS1085-15 | Pelecypora isocardia       | Pelecypora isocardia       | Species | BOLD:AAO7896 | 8  | Pelecypora isocardia[4], Pelecypora trigona[2]   |
| QWEAS1084-15 | Pelecypora isocardia       | Pelecypora isocardia       |         |              |    |                                                  |
| QWEAS1498-15 | Pelecypora trigona         | Pelecypora trigona         |         |              |    |                                                  |
| QWEAS1500-15 | Periglypta compressa       | Periglypta compressa       | Species | BOLD:AAL2655 | 6  | Periglypta puerpera[4], Periglypta compressa[2]  |
| QWEAS1204-15 | Periglypta puerpera        | Periglypta puerpera        |         |              |    |                                                  |
| QWEAS1203-15 | Periglypta puerpera        | Periglypta puerpera        | Species | BOLD:AAL2654 | 35 | Periglypta puerpera[34], Periglypta puerperal[1] |
| QWEAS1194-15 | Periglypta puerpera        | Periglypta puerpera        |         |              |    |                                                  |
| QWEAS1199-15 | Periglypta puerpera        | Periglypta puerpera        |         |              |    |                                                  |
| QWEAS1201-15 | Periglypta puerpera        | Periglypta puerpera        |         |              |    |                                                  |
| QWEAS1197-15 | Periglypta puerpera        | Periglypta puerpera        |         |              |    |                                                  |
| QWEAS1196-15 | Periglypta puerpera        | Periglypta puerpera        |         |              |    |                                                  |
| QWEAS1198-15 | Periglypta puerpera        | Periglypta puerpera        |         |              |    |                                                  |
| QWEAS1202-15 | Periglypta puerpera        | Periglypta puerpera        |         |              |    |                                                  |
| QWEAS1200-15 | Periglypta puerpera        | Periglypta puerpera        |         |              |    |                                                  |
| QWEAS1195-15 | Periglypta puerpera        | Periglypta puerpera        |         |              |    |                                                  |
| QWEAS1193-15 | Periglypta puerpera        | Periglypta puerpera        |         |              |    |                                                  |
| QWEAS1569-15 | Peronia verruculata        | Peronia verruculata        | Species | BOLD:AAM2482 | 25 | Peronia verruculata[18], Peronia sp. CC-2010[3]  |
| QWEAS1567-15 | Peronia verruculata        | Peronia verruculata        |         |              |    |                                                  |
| QWEAS1568-15 | Peronia verruculata        | Peronia verruculata        |         |              |    |                                                  |
| SSEO763-16   | Pinctada albina            | Pinctada albina            | Species | BOLD:AAH9358 | 4  | Pinctada albina[2], Pinctada maculata[1]         |
| QWEAS844-15  | Pinctada fucata            | Pinctada fucata            | Species | BOLD:AA3639  | 9  | Pinctada fucata[7], Pinctada martensi[4]         |
| QWEAS841-15  | Pinctada fucata            | Pinctada fucata            |         |              |    |                                                  |
| SSEO785-16   | Pinctada fucata            | Pinctada fucata            |         |              |    |                                                  |
| QWEAS843-15  | Pinctada fucata            | Pinctada fucata            |         |              |    |                                                  |
| QWEAS840-15  | Pinctada fucata            | Pinctada fucata            |         |              |    |                                                  |

|              |                                |                                |         |              |    |                                                                                                                                      |
|--------------|--------------------------------|--------------------------------|---------|--------------|----|--------------------------------------------------------------------------------------------------------------------------------------|
| QWEAS845-15  | <i>Pinctada fucata</i>         | <i>Pinctada fucata</i>         |         |              |    |                                                                                                                                      |
| QWEAS842-15  | <i>Pinctada fucata</i>         | <i>Pinctada fucata</i>         |         |              |    |                                                                                                                                      |
| SSEO786-16   | <i>Pinctada martensi</i>       | <i>Pinctada martensi</i>       |         |              |    |                                                                                                                                      |
| SSEO749-16   | <i>Pinctada martensi</i>       | <i>Pinctada martensi</i>       |         |              |    |                                                                                                                                      |
| QWEAS846-15  | <i>Pinctada margaritifera</i>  | <i>Pinctada margaritifera</i>  | Species | BOLD:AAY3638 | 15 | <i>Pinctada margaritifera</i> [12],<br><i>Pinctada maxima</i> [1]                                                                    |
| QWEAS852-15  | <i>Pinctada margaritifera</i>  | <i>Pinctada margaritifera</i>  |         |              |    |                                                                                                                                      |
| QWEAS855-15  | <i>Pinctada margaritifera</i>  | <i>Pinctada margaritifera</i>  |         |              |    |                                                                                                                                      |
| QWEAS854-15  | <i>Pinctada margaritifera</i>  | <i>Pinctada margaritifera</i>  |         |              |    |                                                                                                                                      |
| QWEAS849-15  | <i>Pinctada margaritifera</i>  | <i>Pinctada margaritifera</i>  |         |              |    |                                                                                                                                      |
| SSEO764-16   | <i>Pinctada margaritifera</i>  | <i>Pinctada margaritifera</i>  |         |              |    |                                                                                                                                      |
| QWEAS858-15  | <i>Pinctada sp.</i>            | <i>Pinctada sp.</i>            | Species | BOLD:ACX4447 | 4  | <i>Pinctada sp.</i> [3], <i>Pinctada maculata</i> [1]                                                                                |
| QWEAS856-15  | <i>Pinctada sp.</i>            | <i>Pinctada sp.</i>            |         |              |    |                                                                                                                                      |
| QWEAS859-15  | <i>Pinctada sp.</i>            | <i>Pinctada sp.</i>            |         |              |    |                                                                                                                                      |
| QWEAS1081-15 | <i>Pitar japonicum</i>         | <i>Pitar japonicum</i>         | Species | BOLD:AAO6833 | 4  | <i>Pitar japonicum</i> [2], <i>Pitar sulfureum</i> [1]                                                                               |
| QWEAS1079-15 | <i>Pitar striatus</i>          | <i>Pitar striatus</i>          | Species | BOLD:AAL4095 | 11 | <i>Pitar striatus</i> [7], <i>Pitar japonicum</i> [1]                                                                                |
| QWEAS1078-15 | <i>Pitar striatus</i>          | <i>Pitar striatus</i>          |         |              |    |                                                                                                                                      |
| QWEAS1080-15 | <i>Pitar striatus</i>          | <i>Pitar striatus</i>          |         |              |    |                                                                                                                                      |
| SSEO161-16   | <i>Plakobranthus ocellatus</i> | <i>Plakobranthus ocellatus</i> | Species | BOLD:ACB7131 | 49 | <i>Plakobranthus ocellatus</i> [41],<br><i>Plakobranthus sp. white</i> JV2013[7],<br><i>Plakobranthus cf. ocellatus</i><br>KH2010[1] |
| SSEO164-16   | <i>Plakobranthus ocellatus</i> | <i>Plakobranthus ocellatus</i> |         |              |    |                                                                                                                                      |
| SSEO163-16   | <i>Plakobranthus ocellatus</i> | <i>Plakobranthus ocellatus</i> |         |              |    |                                                                                                                                      |
| SSEO165-16   | <i>Plakobranthus ocellatus</i> | <i>Plakobranthus ocellatus</i> |         |              |    |                                                                                                                                      |
| SSEO162-16   | <i>Plakobranthus ocellatus</i> | <i>Plakobranthus ocellatus</i> | Species | BOLD:ACH4500 | 4  | <i>Plakobranthus sp. purple</i> JV2013[2], <i>Plakobranthus ocellatus</i> [2]                                                        |
| SSEO165-16   | <i>Plakobranthus ocellatus</i> | <i>Plakobranthus ocellatus</i> | Species | BOLD:ACH4499 | 3  | <i>Plakobranthus ocellatus</i> [2],<br><i>Plakobranthus sp. black</i> JV2013[1]                                                      |
| SSEO162-16   | <i>Plakobranthus ocellatus</i> | <i>Plakobranthus ocellatus</i> | Species | BOLD:ACH4501 | 5  | <i>Plakobranthus sp. blue</i> JV2013[3],<br><i>Plakobranthus ocellatus</i> [2]                                                       |
| QWEAS1579-15 | <i>Platevindex mortoni</i>     | <i>Platevindex mortoni</i>     | Species | BOLD:AAM4035 | 6  | <i>Platevindex cf. mortoni</i>                                                                                                       |

|             |                    |                    |         |              |    |                                                |
|-------------|--------------------|--------------------|---------|--------------|----|------------------------------------------------|
|             |                    |                    |         |              |    | HDS-2009[4], Platevindex mortoni[2]            |
| SSEO1116-16 | Rapana bezoar      | Rapana bezoar      | Species | BOLD:AAA6876 | 97 | Rapana venosa[91], Rapana bezoar[1]            |
| QWEAS332-15 | Rapana venosa      | Rapana venosa      |         |              |    |                                                |
| QWEAS334-15 | Rapana venosa      | Rapana venosa      |         |              |    |                                                |
| QWEAS331-15 | Rapana venosa      | Rapana venosa      |         |              |    |                                                |
| QWEAS330-15 | Rapana venosa      | Rapana venosa      |         |              |    |                                                |
| QWEAS333-15 | Rapana venosa      | Rapana venosa      |         |              |    |                                                |
| SSEO1495-16 | Rapana venosa      | Rapana venosa      |         |              |    |                                                |
| SSEO1493-16 | Rapana venosa      | Rapana venosa      |         |              |    |                                                |
| SSEO1494-16 | Rapana venosa      | Rapana venosa      |         |              |    |                                                |
| QWEAS343-15 | Rapana rapiformis  | Rapana rapiformis  | Species | BOLD:AAY0420 | 16 | Rapana rapiformis[14], Rapana rapiormis[1]     |
| QWEAS344-15 | Rapana rapiformis  | Rapana rapiformis  |         |              |    |                                                |
| QWEAS342-15 | Rapana rapiformis  | Rapana rapiformis  |         |              |    |                                                |
| QWEAS345-15 | Rapana rapiformis  | Rapana rapiformis  |         |              |    |                                                |
| QWEAS341-15 | Rapana rapiformis  | Rapana rapiformis  |         |              |    |                                                |
| QWEAS340-15 | Rapana rapiformis  | Rapana rapiformis  |         |              |    |                                                |
| SSEO283-16  | Roboastra gracilis | Roboastra gracilis | Species | BOLD:AAX8780 | 3  | Roboastra gracilis[2], Roboastra tigris[1]     |
| QWEAS024-15 | Saccostrea mordax  | Saccostrea mordax  | Species | BOLD:AAM4926 | 15 | Saccostrea mordax[10], Saccostrea cucullata[1] |
| QWEAS027-15 | Saccostrea mordax  | Saccostrea mordax  |         |              |    |                                                |
| QWEAS028-15 | Saccostrea mordax  | Saccostrea mordax  |         |              |    |                                                |
| QWEAS025-15 | Saccostrea mordax  | Saccostrea mordax  |         |              |    |                                                |
| QWEAS026-15 | Saccostrea mordax  | Saccostrea mordax  |         |              |    |                                                |
| QWEAS151-15 | Sepia esculenta    | Sepia esculenta    | Species | BOLD:AAE9622 | 27 | Sepia esculenta[16], Sepia aculeata[1]         |
| QWEAS156-15 | Sepia esculenta    | Sepia esculenta    |         |              |    |                                                |
| QWEAS157-15 | Sepia esculenta    | Sepia esculenta    |         |              |    |                                                |
| QWEAS154-15 | Sepia esculenta    | Sepia esculenta    |         |              |    |                                                |
| QWEAS150-15 | Sepia esculenta    | Sepia esculenta    |         |              |    |                                                |
| QWEAS153-15 | Sepia esculenta    | Sepia esculenta    |         |              |    |                                                |



|              |                                |                                |         |              |     |                                                                                                                                                                                                                                                                                                                                                                                                                                                                |
|--------------|--------------------------------|--------------------------------|---------|--------------|-----|----------------------------------------------------------------------------------------------------------------------------------------------------------------------------------------------------------------------------------------------------------------------------------------------------------------------------------------------------------------------------------------------------------------------------------------------------------------|
| QWEAS152-15  | <i>Sepia esculenta</i>         | <i>Sepia esculenta</i>         |         |              |     |                                                                                                                                                                                                                                                                                                                                                                                                                                                                |
| QWEAS155-15  | <i>Sepia esculenta</i>         | <i>Sepia esculenta</i>         |         |              |     |                                                                                                                                                                                                                                                                                                                                                                                                                                                                |
| SSEO064-16   | <i>Sepia lorigera</i>          | <i>Sepia lorigera</i>          | Species | BOLD:AAJ7641 | 3   | <i>Sepia lorigera</i> [2], <i>Sepia</i> sp. SI0604[1]                                                                                                                                                                                                                                                                                                                                                                                                          |
| SSEO192-16   | <i>Sepia tenuipes</i>          | <i>Sepia tenuipes</i>          | Species | BOLD:AAA1559 | 317 | <i>Sepia officinalis</i> [314], <i>Sepia tenuipes</i> [2]                                                                                                                                                                                                                                                                                                                                                                                                      |
| SSEO062-16   | <i>Sepiella maindroni</i>      | <i>Sepiella maindroni</i>      | Species | BOLD:AAD8672 | 2   | <i>Sepiella maindroni</i> [1], <i>Sepiella inermis</i> [1]                                                                                                                                                                                                                                                                                                                                                                                                     |
| SSEO328-16   | <i>Sepioteuthis lessoniana</i> | <i>Sepioteuthis lessoniana</i> | Species | BOLD:AAA9505 | 57  | <i>Sepioteuthis lessoniana</i> [36], <i>Sepioteuthis</i> cf. <i>lessoniana</i> [15], <i>Sepioteuthis</i> cf. <i>lessoniana</i> VN108[1], <i>Sepioteuthis</i> cf. <i>lessoniana</i> VN068[1], <i>Sepioteuthis</i> cf. <i>lessoniana</i> BAL00610[1], <i>Sepioteuthis</i> cf. <i>lessoniana</i> ACEH12MAY02[1], <i>Sepioteuthis</i> cf. <i>lessoniana</i> BAL00501[1], <i>Sepioteuthis</i> cf. <i>lessoniana</i> BAL00637[1]                                     |
| SSEO317-16   | <i>Sepioteuthis lessoniana</i> | <i>Sepioteuthis lessoniana</i> |         |              |     |                                                                                                                                                                                                                                                                                                                                                                                                                                                                |
| SSEO327-16   | <i>Sepioteuthis lessoniana</i> | <i>Sepioteuthis lessoniana</i> |         |              |     |                                                                                                                                                                                                                                                                                                                                                                                                                                                                |
| SSEO319-16   | <i>Sepioteuthis lessoniana</i> | <i>Sepioteuthis lessoniana</i> |         |              |     |                                                                                                                                                                                                                                                                                                                                                                                                                                                                |
| SSEO318-16   | <i>Sepioteuthis lessoniana</i> | <i>Sepioteuthis lessoniana</i> |         |              |     |                                                                                                                                                                                                                                                                                                                                                                                                                                                                |
| SSEO316-16   | <i>Sepioteuthis lessoniana</i> | <i>Sepioteuthis lessoniana</i> |         |              |     |                                                                                                                                                                                                                                                                                                                                                                                                                                                                |
| SSEO326-16   | <i>Sepioteuthis lessoniana</i> | <i>Sepioteuthis lessoniana</i> |         |              |     |                                                                                                                                                                                                                                                                                                                                                                                                                                                                |
| SSEO320-16   | <i>Sepioteuthis lessoniana</i> | <i>Sepioteuthis lessoniana</i> |         |              |     |                                                                                                                                                                                                                                                                                                                                                                                                                                                                |
| SSEO330-16   | <i>Sepioteuthis lessoniana</i> | <i>Sepioteuthis lessoniana</i> | Species | BOLD:AAA9503 | 138 | <i>Sepioteuthis</i> cf. <i>lessoniana</i> [74], <i>Sepioteuthis lessoniana</i> [45], <i>Sepioteuthis</i> cf. <i>lessoniana</i> TIC00513[1], <i>Sepioteuthis</i> cf. <i>lessoniana</i> TIC008[1], <i>Sepioteuthis</i> cf. <i>lessoniana</i> TIC00421[1], <i>Sepioteuthis</i> cf. <i>lessoniana</i> TIC022[1], <i>Sepioteuthis</i> cf. <i>lessoniana</i> VN150[1], <i>Sepioteuthis</i> cf. <i>lessoniana</i> VN070[1], <i>Sepioteuthis</i> cf. <i>lessoniana</i> |
| SSEO333-16   | <i>Sepioteuthis lessoniana</i> | <i>Sepioteuthis lessoniana</i> |         |              |     |                                                                                                                                                                                                                                                                                                                                                                                                                                                                |
| SSEO334-16   | <i>Sepioteuthis lessoniana</i> | <i>Sepioteuthis lessoniana</i> |         |              |     |                                                                                                                                                                                                                                                                                                                                                                                                                                                                |
| SSEO329-16   | <i>Sepioteuthis lessoniana</i> | <i>Sepioteuthis lessoniana</i> |         |              |     |                                                                                                                                                                                                                                                                                                                                                                                                                                                                |
| SSEO331-16   | <i>Sepioteuthis lessoniana</i> | <i>Sepioteuthis lessoniana</i> |         |              |     |                                                                                                                                                                                                                                                                                                                                                                                                                                                                |
| SSEO332-16   | <i>Sepioteuthis lessoniana</i> | <i>Sepioteuthis lessoniana</i> |         |              |     |                                                                                                                                                                                                                                                                                                                                                                                                                                                                |
| SSEO003-15   | <i>Sepioteuthis lessoniana</i> | <i>Sepioteuthis lessoniana</i> |         |              |     |                                                                                                                                                                                                                                                                                                                                                                                                                                                                |
| SSEO002-15   | <i>Sepioteuthis lessoniana</i> | <i>Sepioteuthis lessoniana</i> |         |              |     |                                                                                                                                                                                                                                                                                                                                                                                                                                                                |
| SSEO001-15   | <i>Sepioteuthis lessoniana</i> | <i>Sepioteuthis lessoniana</i> |         |              |     |                                                                                                                                                                                                                                                                                                                                                                                                                                                                |
| QWEAS1354-15 | <i>Sepioteuthis lessoniana</i> | <i>Sepioteuthis lessoniana</i> |         |              |     |                                                                                                                                                                                                                                                                                                                                                                                                                                                                |

|              |                     |                     |         |              |     |                                                                                                                                                                                                                                                                                                                                                                                                                                                                  |
|--------------|---------------------|---------------------|---------|--------------|-----|------------------------------------------------------------------------------------------------------------------------------------------------------------------------------------------------------------------------------------------------------------------------------------------------------------------------------------------------------------------------------------------------------------------------------------------------------------------|
|              |                     |                     |         |              |     | TIC00101[1], Sepioteuthis cf. lessoniana TIC016[1], Sepioteuthis cf. lessoniana RAJ005[1], Sepioteuthis cf. lessoniana DUM035[1], Sepioteuthis cf. lessoniana DON013[1], Sepioteuthis cf. lessoniana BAL00604[1], Sepioteuthis cf. lessoniana DUM04402[1], Sepioteuthis cf. lessoniana DUM04410[1], Sepioteuthis cf. lessoniana RAJ00401[1], Sepioteuthis cf. lessoniana PSE001[1], Sepioteuthis cf. lessoniana MAN040[1], Sepioteuthis cf. lessoniana RAJ020[1] |
| QWEAS1483-15 | Siphonaria japonica | Siphonaria japonica | Species | BOLD:ACH7183 | 264 | Siphonaria japonica[259], Siphonaria sp.[2], Siphonaria sp. UF 350553[1], Siphonaria sp. UF 310519[1], Siphonaria sp. UF 310521[1]                                                                                                                                                                                                                                                                                                                               |
| QWEAS1481-15 | Siphonaria japonica | Siphonaria japonica |         |              |     |                                                                                                                                                                                                                                                                                                                                                                                                                                                                  |
| QWEAS1476-15 | Siphonaria japonica | Siphonaria japonica |         |              |     |                                                                                                                                                                                                                                                                                                                                                                                                                                                                  |
| QWEAS1478-15 | Siphonaria japonica | Siphonaria japonica |         |              |     |                                                                                                                                                                                                                                                                                                                                                                                                                                                                  |
| QWEAS1482-15 | Siphonaria japonica | Siphonaria japonica |         |              |     |                                                                                                                                                                                                                                                                                                                                                                                                                                                                  |
| QWEAS1479-15 | Siphonaria japonica | Siphonaria japonica |         |              |     |                                                                                                                                                                                                                                                                                                                                                                                                                                                                  |
| QWEAS1475-15 | Siphonaria japonica | Siphonaria japonica |         |              |     |                                                                                                                                                                                                                                                                                                                                                                                                                                                                  |
| QWEAS1477-15 | Siphonaria japonica | Siphonaria japonica |         |              |     |                                                                                                                                                                                                                                                                                                                                                                                                                                                                  |
| QWEAS1484-15 | Siphonaria japonica | Siphonaria japonica |         |              |     |                                                                                                                                                                                                                                                                                                                                                                                                                                                                  |
| QWEAS1485-15 | Siphonaria japonica | Siphonaria japonica |         |              |     |                                                                                                                                                                                                                                                                                                                                                                                                                                                                  |
| QWEAS1480-15 | Siphonaria japonica | Siphonaria japonica |         |              |     |                                                                                                                                                                                                                                                                                                                                                                                                                                                                  |
| QWEAS1486-15 | Siphonaria japonica | Siphonaria japonica |         |              |     |                                                                                                                                                                                                                                                                                                                                                                                                                                                                  |
| SSEO290-16   | Tambja morosa       | Tambja morosa       | Species | BOLD:AAH9566 | 5   | Tambja morosa[3], Tambja                                                                                                                                                                                                                                                                                                                                                                                                                                         |

|             |                      |                      |         |              |     |                                                     |
|-------------|----------------------|----------------------|---------|--------------|-----|-----------------------------------------------------|
|             |                      |                      |         |              |     | olivaria[2]                                         |
| SSEO1261-16 | Terebralia palustris | Terebralia palustris | Species | BOLD:AAF2150 | 191 | Terebralia palustris[190],<br>Terebralia sulcata[1] |
| QWEAS355-15 | Thais javanica       | Thais javanica       | Species | BOLD:ACB7301 | 7   | Thais javanica[6], Thais<br>rufotincta[1]           |
| QWEAS354-15 | Thais javanica       | Thais javanica       |         |              |     |                                                     |
| SSEO1338-16 | Turbo argyrostomus   | Turbo argyrostomus   | Species | BOLD:AAF6399 | 6   | Turbo cepoides[3], Turbo<br>argyrostomus[3]         |
| SSEO1350-16 | Turbo cornutus       | Turbo cornutus       | Species | BOLD:AAF6398 | 16  | Turbo cornutus[13], Turbo<br>chinensis[3]           |
| SSEO1522-16 | Turbo cornutus       | Turbo cornutus       |         |              |     |                                                     |
| SSEO1521-16 | Turbo cornutus       | Turbo cornutus       |         |              |     |                                                     |
| SSEO1344-16 | Turbo cornutus       | Turbo cornutus       |         |              |     |                                                     |
| SSEO1523-16 | Turbo cornutus       | Turbo cornutus       |         |              |     |                                                     |
| QWEAS467-15 | Turritella terebra   | Turritella terebra   | Species | BOLD:ACB7650 | 12  | Turritella terebra[10], Turritella<br>bacillum[2]   |
| QWEAS465-15 | Turritella terebra   | Turritella terebra   |         |              |     |                                                     |
| QWEAS466-15 | Turritella terebra   | Turritella terebra   |         |              |     |                                                     |
| QWEAS463-15 | Turritella terebra   | Turritella terebra   |         |              |     |                                                     |
| QWEAS464-15 | Turritella terebra   | Turritella terebra   |         |              |     |                                                     |

**Supplementary Fig 1.** The relationship between GC content and COI distance across genera. Mean nearest neighbour distance (% K2P) between congeneric species at COI plotted against mean GC content (%) in the 123 genera of marine molluscs. The regression was significant ( $P < 0.001$ ;  $R^2 = 0.167$ ).

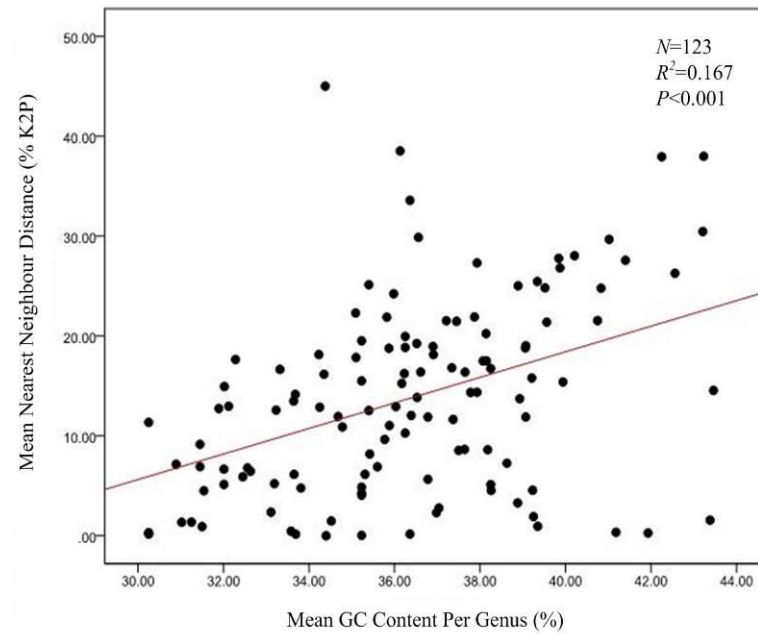

**Supplementary Fig 2.** Histogram of threshold optimization method reporting the frequencies of false-positive error (no conspecific matches within threshold but conspecific samples available) and false-negative error (more than one species recorded within threshold) identifications across thresholds values from 0.01 to 0.1.

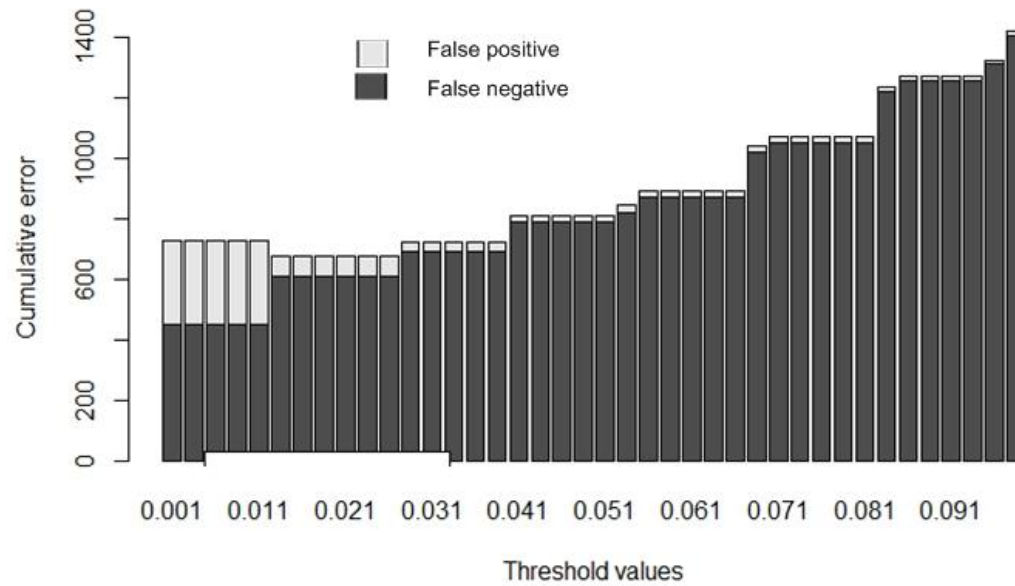

**Supplementary Fig 3.** Density plot of genetic distances generated by the function 'localMinima' in SPIDER package corresponding to the transition between intra- and interspecific distances. The minimum of a density plot of genetic distances is highlighted in grey.

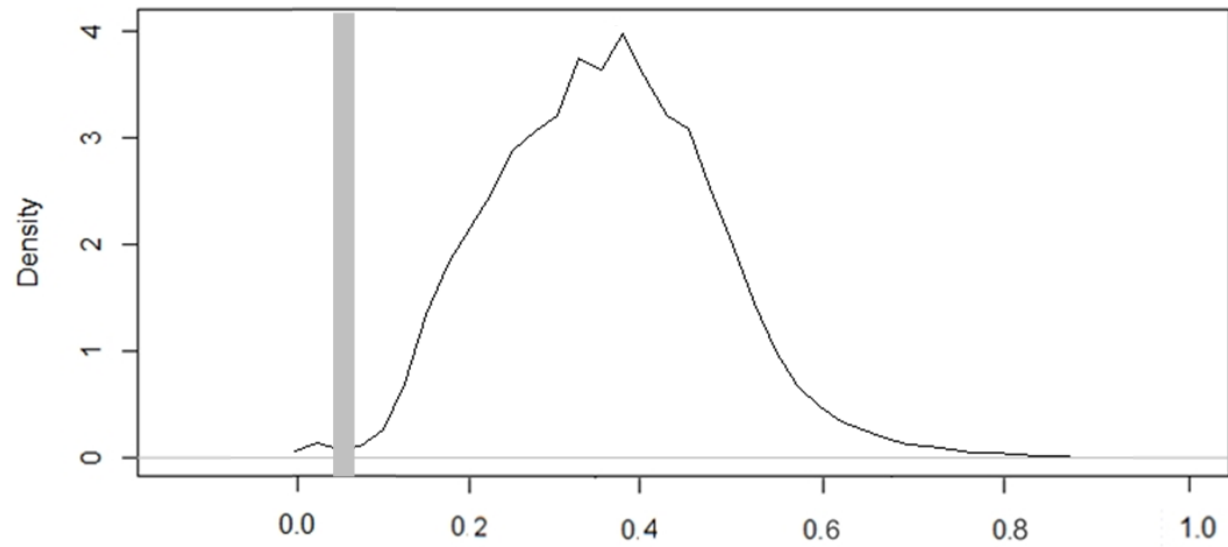

**Supplementary Fig 4 Neighbour-Joining (NJ) tree of 2801 COI barcodes based on K2P model (performed on the BOLD database).** The highlighted cluster in magenta and yellow indicate species with a high cryptic diversity and species formed paraphyly clusters, respectively. The framed clusters indicate the species characterized by haplotype sharing.

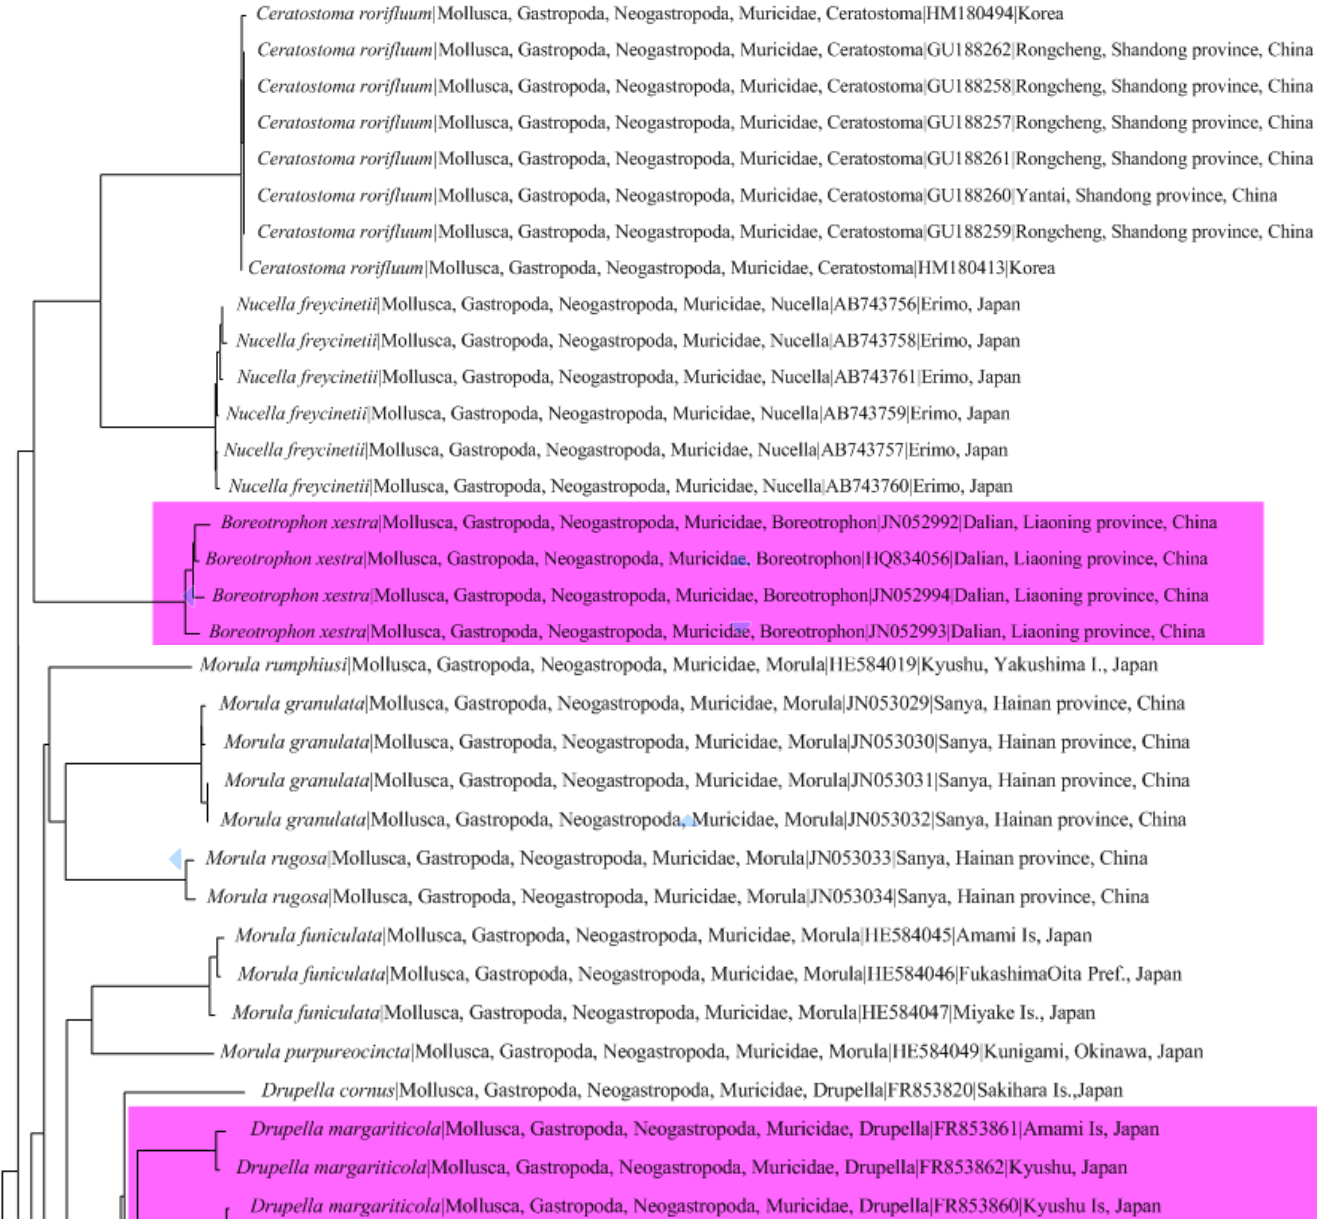

*Drupella margariticola*|Mollusca, Gastropoda, Neogastropoda, Muricidae, Drupella|GU188268|Beihai, Guangxi province, China  
*Drupella margariticola*|Mollusca, Gastropoda, Neogastropoda, Muricidae, Drupella|JN053037|Sanya, Hainan province, China  
*Drupella margariticola*|Mollusca, Gastropoda, Neogastropoda, Muricidae, Drupella|GU188271|Sanya, Hainan province, China  
*Drupella margariticola*|Mollusca, Gastropoda, Neogastropoda, Muricidae, Drupella|FR853823|Hong Kong, China  
*Drupella margariticola*|Mollusca, Gastropoda, Neogastropoda, Muricidae, Drupella|JN053036|Beihai, Guangxi province, China  
*Drupella margariticola*|Mollusca, Gastropoda, Neogastropoda, Muricidae, Drupella|FR853857|Hong Kong, China  
*Drupella margariticola*|Mollusca, Gastropoda, Neogastropoda, Muricidae, Drupella|FR853858|Hong Kong, China  
*Drupella margariticola*|Mollusca, Gastropoda, Neogastropoda, Muricidae, Drupella|GU188270|Sanya, Hainan province, China  
*Drupella margariticola*|Mollusca, Gastropoda, Neogastropoda, Muricidae, Drupella|GU188269|Beihai, Guangxi province, China  
*Drupella margariticola*|Mollusca, Gastropoda, Neogastropoda, Muricidae, Drupella|FR853859|Hong Kong, China

*Drupella eburnea*|Mollusca, Gastropoda, Neogastropoda, Muricidae, Drupella|FR853828|SakaematsuKyushu Is, Japan

*Drupella rugosa*|Mollusca, Gastropoda, Neogastropoda, Muricidae, Drupella|FR853827|Kyushu Is, Japan

*Drupella rugosa*|Mollusca, Gastropoda, Neogastropoda, Muricidae, Drupella|FR853837|Hong Kong, China

*Drupella rugosa*|Mollusca, Gastropoda, Neogastropoda, Muricidae, Drupella|FR853835|Hong Kong, China

*Drupella rugosa*|Mollusca, Gastropoda, Neogastropoda, Muricidae, Drupella|FR853848|Hong Kong, China

*Drupella rugosa*|Mollusca, Gastropoda, Neogastropoda, Muricidae, Drupella|FR853833|Hong Kong, China

*Drupella rugosa*|Mollusca, Gastropoda, Neogastropoda, Muricidae, Drupella|FR853834|Hong Kong, China

*Drupella rugosa*|Mollusca, Gastropoda, Neogastropoda, Muricidae, Drupella|FR853831|Hong Kong, China

*Drupella rugosa*|Mollusca, Gastropoda, Neogastropoda, Muricidae, Drupella|FR853832|Hong Kong, China

*Drupella rugosa*|Mollusca, Gastropoda, Neogastropoda, Muricidae, Drupella|FR853836|Hong Kong, China

*Drupella rugosa*|Mollusca, Gastropoda, Neogastropoda, Muricidae, Drupella|FR853829|Kyushu Is, Japan

*Drupella rugosa*|Mollusca, Gastropoda, Neogastropoda, Muricidae, Drupella|FR853838|Hong Kong, China

*Drupella fragum*|Mollusca, Gastropoda, Neogastropoda, Muricidae, Drupella|FR853845|FukushimaOita Pref., Japan

*Drupella fragum*|Mollusca, Gastropoda, Neogastropoda, Muricidae, Drupella|FR853847|FukushimaOita Pref., Japan

*Drupella fragum*|Mollusca, Gastropoda, Neogastropoda, Muricidae, Drupella|FR853887|FukushimaOita Pref., Japan

*Drupella fragum*|Mollusca, Gastropoda, Neogastropoda, Muricidae, Drupella|FR853884|FukushimaOita Pref., Japan

*Drupella fragum*|Mollusca, Gastropoda, Neogastropoda, Muricidae, Drupella|FR853891|FukushimaOita Pref., Japan

*Drupella fragum*|Mollusca, Gastropoda, Neogastropoda, Muricidae, Drupella|FR853886|FukushimaOita Pref., Japan

*Drupella fragum*|Mollusca, Gastropoda, Neogastropoda, Muricidae, Drupella|FR853890|FukushimaOita Pref., Japan

*Drupella fragum*|Mollusca, Gastropoda, Neogastropoda, Muricidae, Drupella|FR853846|FukushimaOita Pref., Japan

*Drupella fragum*|Mollusca, Gastropoda, Neogastropoda, Muricidae, Drupella|FR853889|FukushimaOita Pref., Japan

*Drupella fragum*|Mollusca, Gastropoda, Neogastropoda, Muricidae, Drupella|FR853892|FukushimaOita Pref., Japan

*Drupella fragum*|Mollusca, Gastropoda, Neogastropoda, Muricidae, Drupella|FR853885|FukushimaOita Pref., Japan

*Drupella fragum*|Mollusca, Gastropoda, Neogastropoda, Muricidae, Drupella|FR853888|FukushimaOita Pref., Japan

*Morula japonica*|Mollusca, Gastropoda, Neogastropoda, Muricidae, Morula|HE584023|Amami Is, Sakihara Is., Japan

*Morula spinosa*|Mollusca, Gastropoda, Neogastropoda, Muricidae, Morula|HE584025|Kagoshima, Japan

*Morula spinosa*|Mollusca, Gastropoda, Neogastropoda, Muricidae, Morula|HE584026|Miyazaki, Japan

*Morula striata*|Mollusca, Gastropoda, Neogastropoda, Muricidae, Morula|HE584027|Amami Is, Sakihara Is., Japan

*Morula striata*|Mollusca, Gastropoda, Neogastropoda, Muricidae, Morula|HE584028|Yaeyama Is, Okinawa, Japan

*Morula zebrina*|Mollusca, Gastropoda, Neogastropoda, Muricidae, Morula|HE584033|Kyushu, Yakushima I., Japan



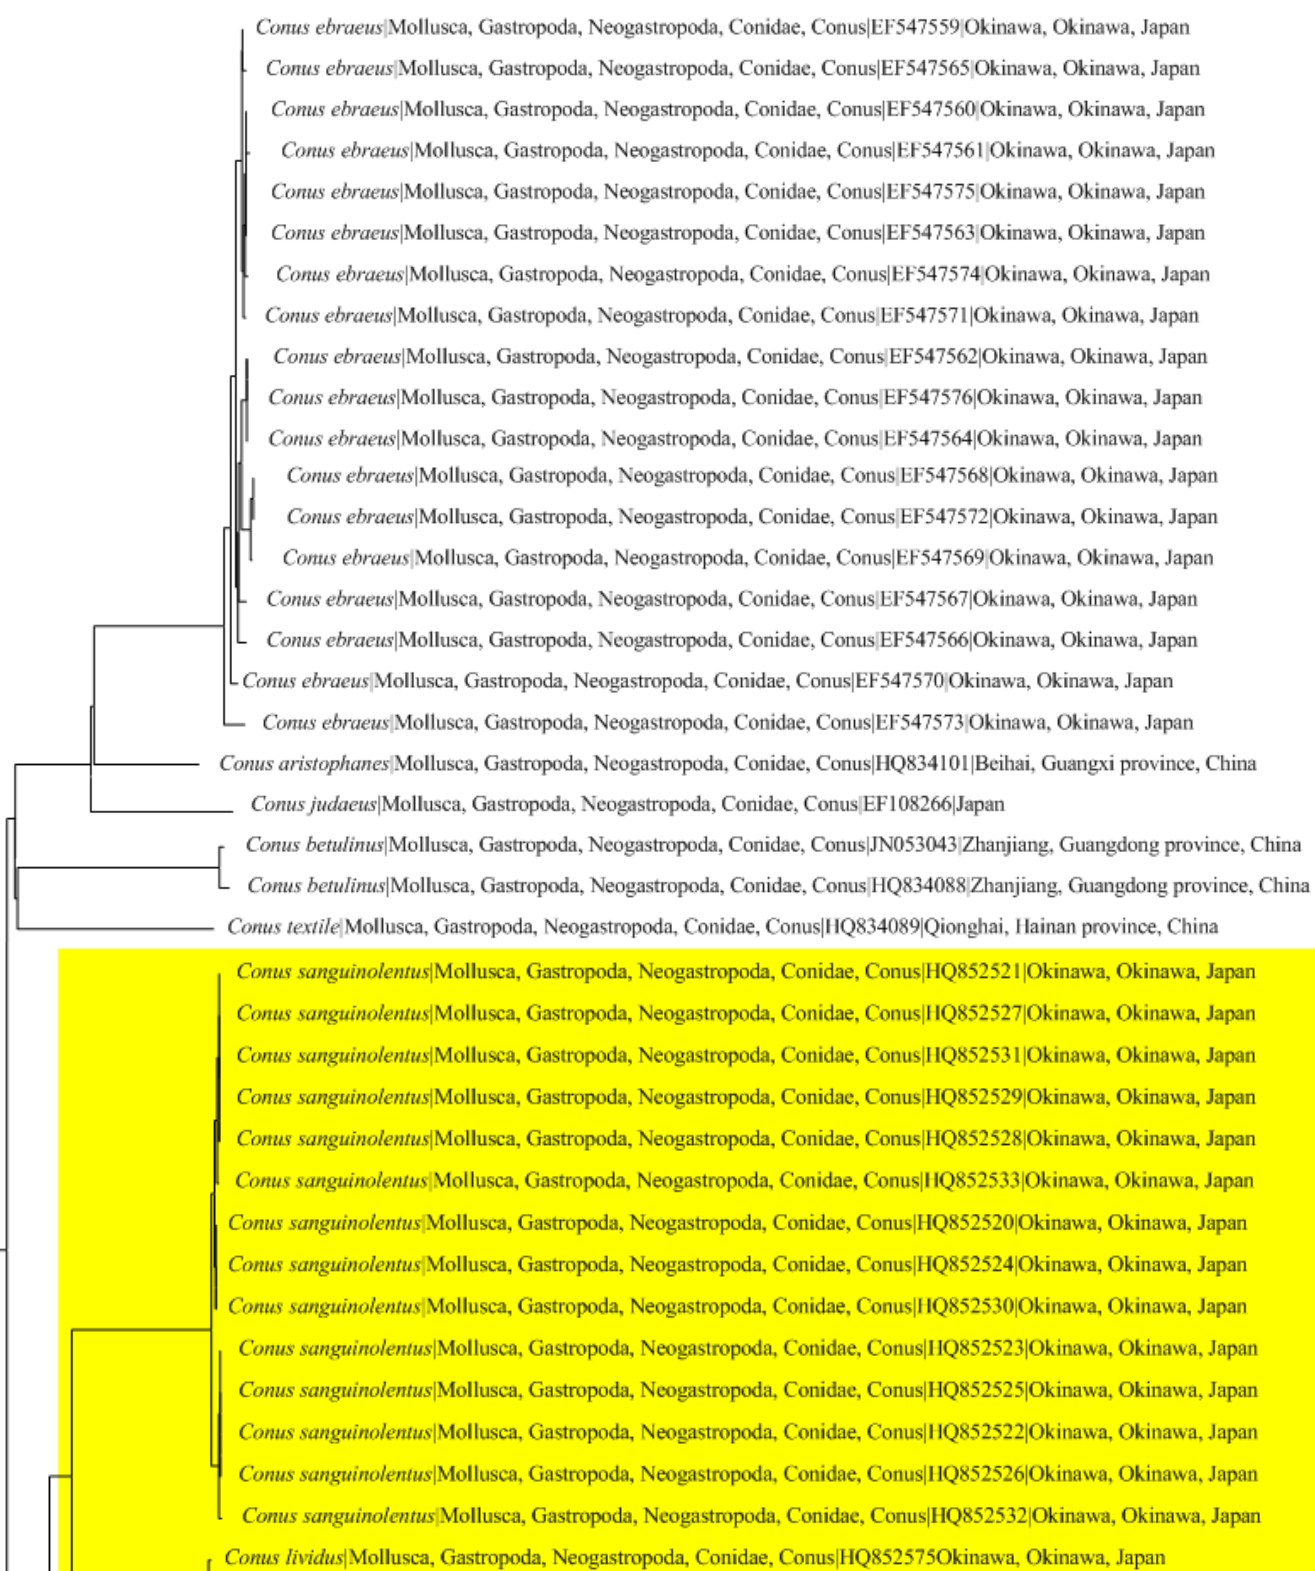

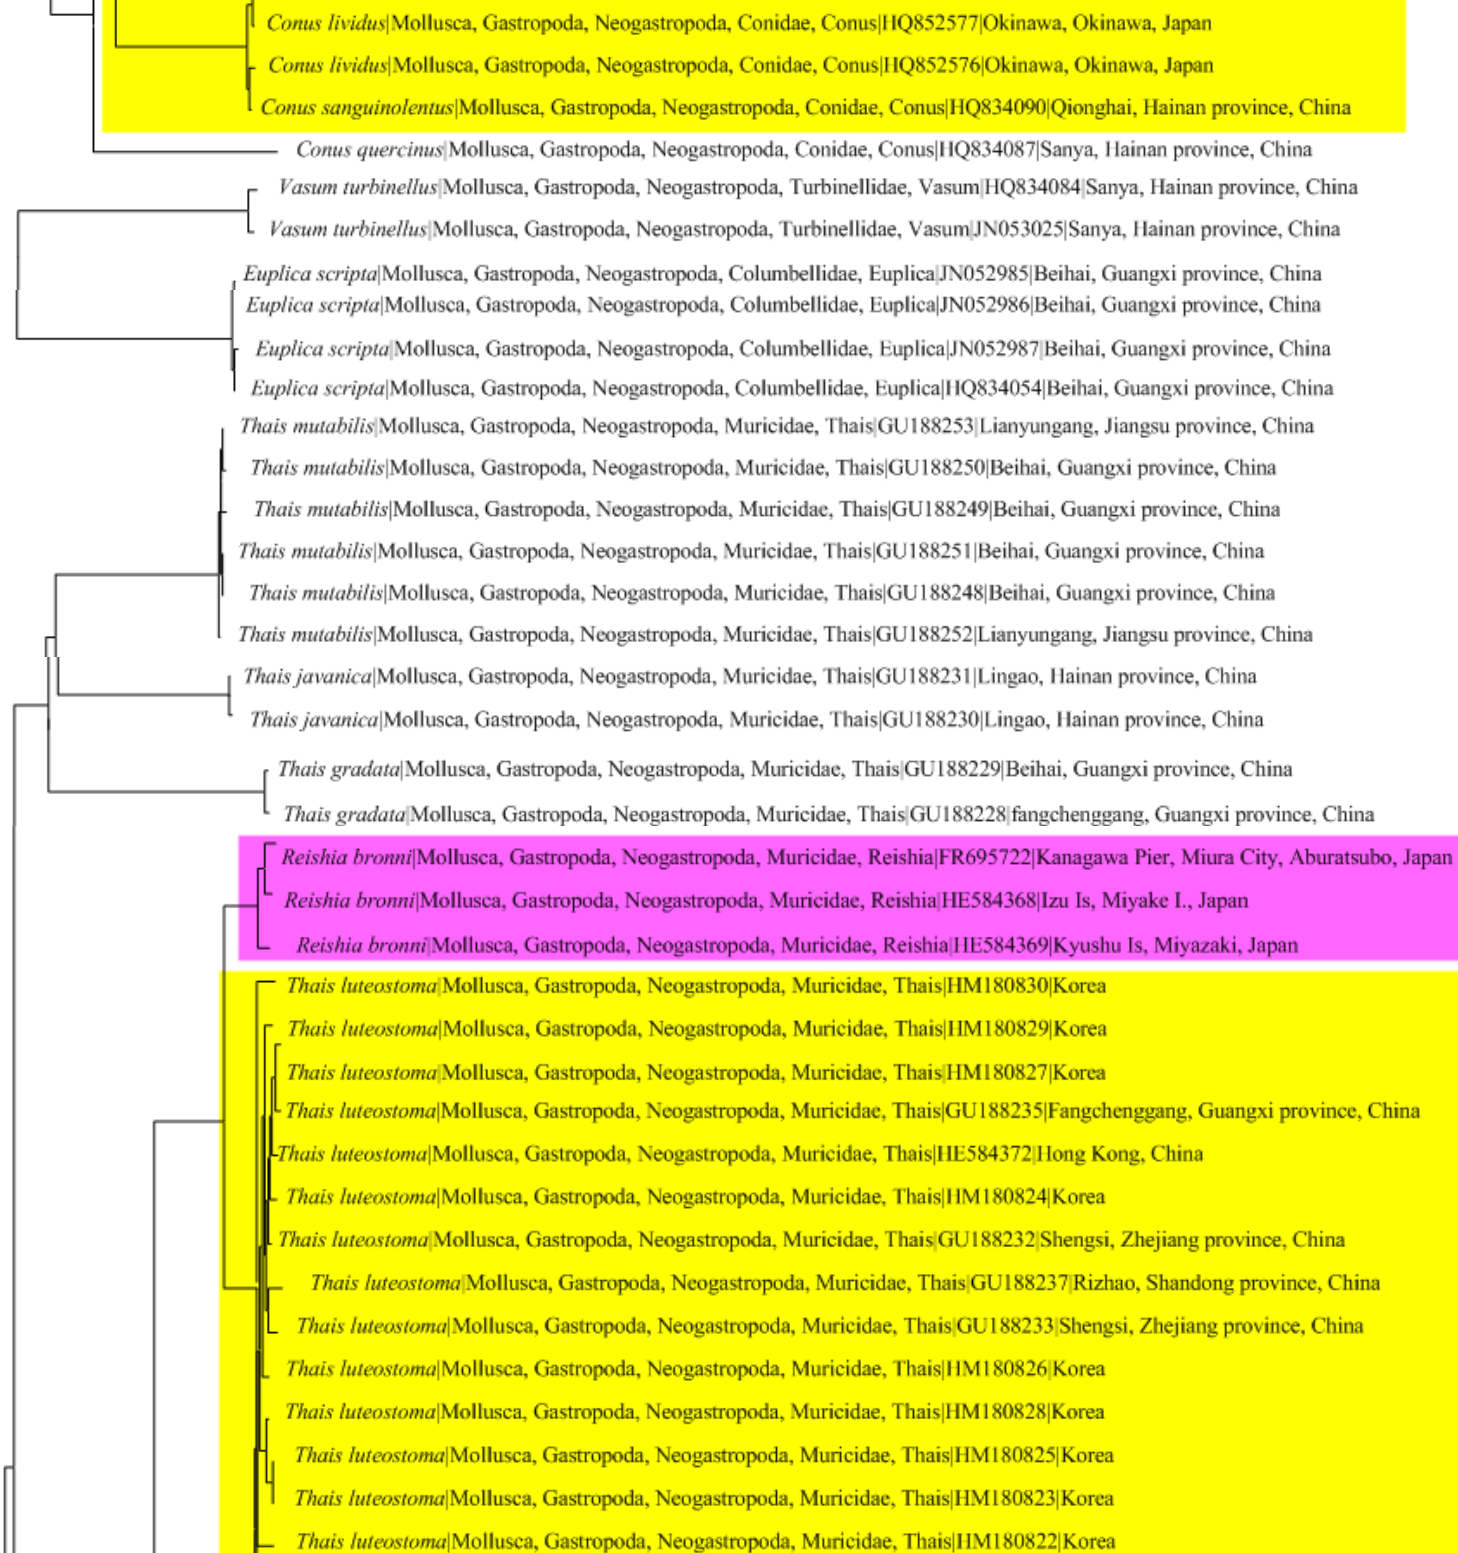

*Thais luteostoma*|Mollusca, Gastropoda, Neogastropoda, Muricidae, Thais|GU188236|Rizhao, Shandong province, China

*Thais luteostoma*|Mollusca, Gastropoda, Neogastropoda, Muricidae, Thais|GU188234|Nanji, Zhejiang province, China

*Thais luteostoma*|Mollusca, Gastropoda, Neogastropoda, Muricidae, Thais|HM180831|Korea

*Thais javanica*|Mollusca, Gastropoda, Neogastropoda, Muricidae, Thais|GU188231|Lingao, Hainan province, China

*Thais javanica*|Mollusca, Gastropoda, Neogastropoda, Muricidae, Thais|GU188230|Lingao, Hainan province, China

*Thais gradata*|Mollusca, Gastropoda, Neogastropoda, Muricidae, Thais|GU188229|Beihai, Guangxi province, China

*Thais gradata*|Mollusca, Gastropoda, Neogastropoda, Muricidae, Thais|GU188228|Fangchenggang, Guangxi province, China

*Thais clavigera*|Mollusca, Gastropoda, Neogastropoda, Muricidae, Thais|HM180818|Korea

*Thais clavigera*|Mollusca, Gastropoda, Neogastropoda, Muricidae, Thais|GU188216|Zhanjiang, Guangdong province, China

*Thais clavigera*|Mollusca, Gastropoda, Neogastropoda, Muricidae, Thais|GU188212|Zhanjiang, Guangdong province, China

*Thais clavigera*|Mollusca, Gastropoda, Neogastropoda, Muricidae, Thais|GU188214|Rizhao, Shandong province, China

*Thais clavigera*|Mollusca, Gastropoda, Neogastropoda, Muricidae, Thais|GU188218|Shengsi, Zhejiang province, China

*Thais clavigera*|Mollusca, Gastropoda, Neogastropoda, Muricidae, Thais|HM180817|Korea

*Thais clavigera*|Mollusca, Gastropoda, Neogastropoda, Muricidae, Thais|GU188213|Fangchenggang, Guangxi province, China

*Thais clavigera*|Mollusca, Gastropoda, Neogastropoda, Muricidae, Thais|HM180820|Korea

*Thais clavigera*|Mollusca, Gastropoda, Neogastropoda, Muricidae, Thais|HM180819|Korea

*Thais clavigera*|Mollusca, Gastropoda, Neogastropoda, Muricidae, Thais|GU188217|Qingdao, Shandong province, China

*Thais clavigera*|Mollusca, Gastropoda, Neogastropoda, Muricidae, Thais|HM180821|Korea

*Rapana venosa*|Mollusca, Gastropoda, Neogastropoda, Muricidae, Rapana|HM180816|Korea

*Rapana venosa*|Mollusca, Gastropoda, Neogastropoda, Muricidae, Rapana|HM180814|Korea

*Rapana venosa*|Mollusca, Gastropoda, Neogastropoda, Muricidae, Rapana|GU188177|Lianyungang, Jiangsu province, China

*Rapana venosa*|Mollusca, Gastropoda, Neogastropoda, Muricidae, Rapana|GU188175|Ganyu, Jiangsu province, China

*Rapana venosa*|Mollusca, Gastropoda, Neogastropoda, Muricidae, Rapana|GU188176|Ganyu, Jiangsu province, China

*Rapana venosa*|Mollusca, Gastropoda, Neogastropoda, Muricidae, Rapana|HM180815|Korea

*Rapana venosa*|Mollusca, Gastropoda, Neogastropoda, Muricidae, Rapana|GU188179|Lianyungang, Jiangsu province, China

*Rapana venosa*|Mollusca, Gastropoda, Neogastropoda, Muricidae, Rapana|GU188178|Lianyungang, Jiangsu province, China

*Rapana venosa*|Mollusca, Gastropoda, Neogastropoda, Muricidae, Rapana|HE584367|Kyushu, Kumamoto, Japan

*Rapana bezoar*|Mollusca, Gastropoda, Neogastropoda, Muricidae, Rapana|FN677421|Tosa Bay, Japan

*Rapana bezoar*|Mollusca, Gastropoda, Neogastropoda, Muricidae, Rapana|GU188170|Zhanjiang, Guangdong province, China

*Rapana bezoar*|Mollusca, Gastropoda, Neogastropoda, Muricidae, Rapana|GU188169|Zhanjiang, Guangdong province, China

*Rapana bezoar*|Mollusca, Gastropoda, Neogastropoda, Muricidae, Rapana|GU188168|Zhanjiang, Guangdong province, China

*Rapana bezoar*|Mollusca, Gastropoda, Neogastropoda, Muricidae, Rapana|GU188167|Zhanjiang, Guangdong province, China

*Rapana bezoar*|Mollusca, Gastropoda, Neogastropoda, Muricidae, Rapana|GU188166|Wenchang, Hainan province, China

*Rapana rapiformis*|Mollusca, Gastropoda, Neogastropoda, Muricidae, Rapana|GU188194|Haikou, Hainan province, China

*Rapana rapiformis*|Mollusca, Gastropoda, Neogastropoda, Muricidae, Rapana|GU188193|Haikou, Hainan province, China

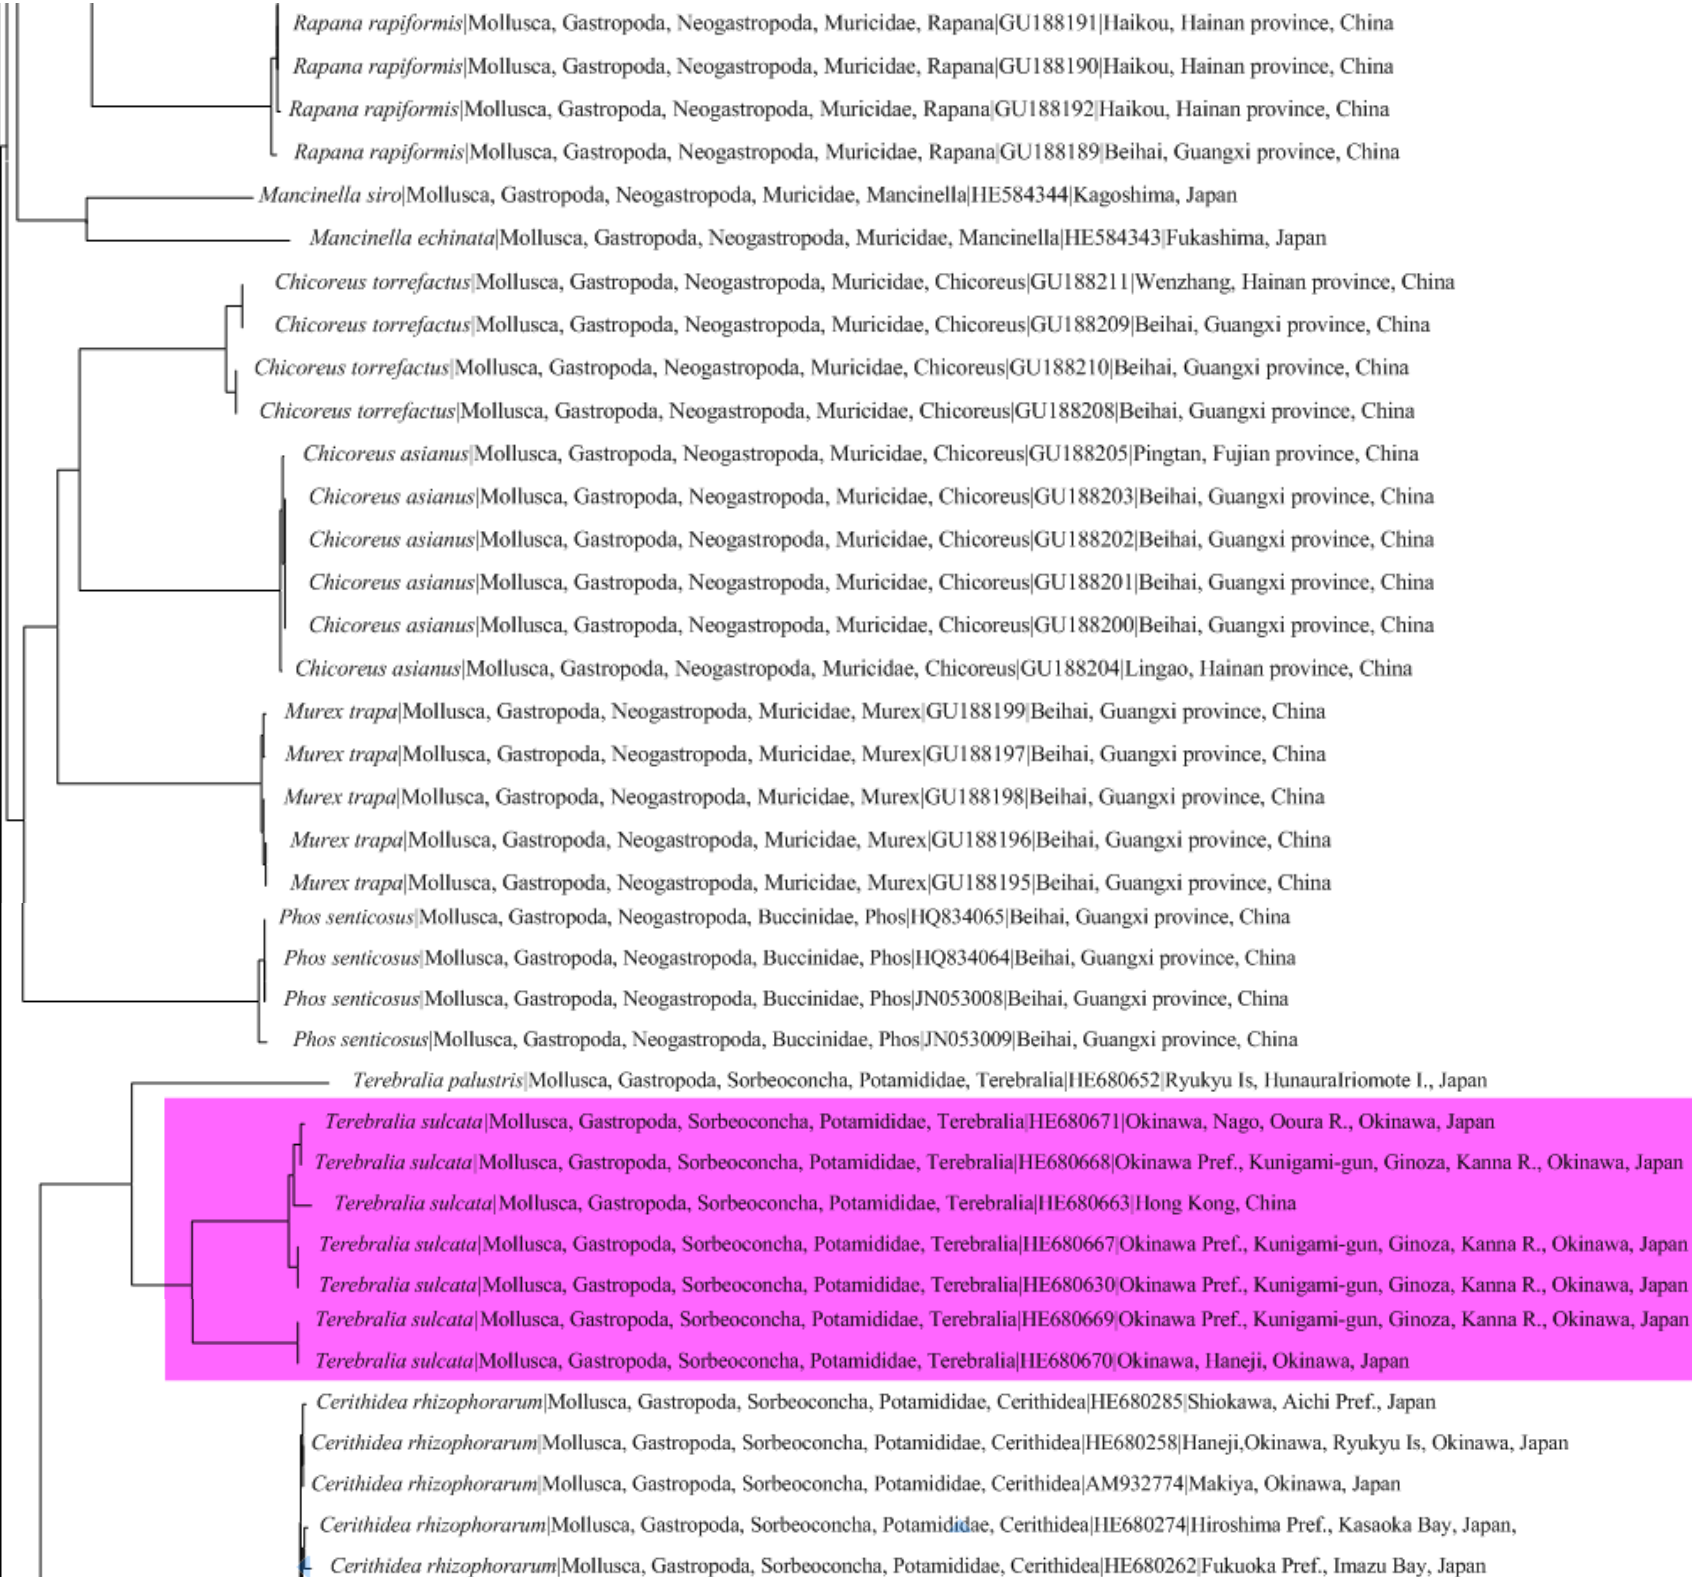

*Cerithidea rhizophorarum*[Mollusca, Gastropoda, Sorbeoconcha, Potamididae, Cerithidea|HE680278|Nagasaki Pref., Isahaya Bay, Japan  
*Cerithidea rhizophorarum*[Mollusca, Gastropoda, Sorbeoconcha, Potamididae, Cerithidea|HE680276|Nagasaki Pref., Isahaya Bay, Japan  
*Cerithidea rhizophorarum*[Mollusca, Gastropoda, Sorbeoconcha, Potamididae, Cerithidea|HE680256|Funaura, Japan  
*Cerithidea rhizophorarum*[Mollusca, Gastropoda, Sorbeoconcha, Potamididae, Cerithidea|HE680254|Funaura, Japan  
*Cerithidea rhizophorarum*[Mollusca, Gastropoda, Sorbeoconcha, Potamididae, Cerithidea|HE680255|Funaura, Japan  
*Cerithidea rhizophorarum*[Mollusca, Gastropoda, Sorbeoconcha, Potamididae, Cerithidea|HE680284|Aichi Pref., Shiokawa, Japan  
*Cerithidea rhizophorarum*[Mollusca, Gastropoda, Sorbeoconcha, Potamididae, Cerithidea|HE680277|Nagasaki Pref., Isahaya Bay, Japan  
*Cerithidea rhizophorarum*[Mollusca, Gastropoda, Sorbeoconcha, Potamididae, Cerithidea|HE680268|Kagoshima Pref., Kiire, Japan  
*Cerithidea rhizophorarum*[Mollusca, Gastropoda, Sorbeoconcha, Potamididae, Cerithidea|HE680266|Kagoshima Pref., Kiire, Japan  
*Cerithidea rhizophorarum*[Mollusca, Gastropoda, Sorbeoconcha, Potamididae, Cerithidea|HE680273|Hiroshima Pref., Kasaoka Bay, Japan,  
*Cerithidea rhizophorarum*[Mollusca, Gastropoda, Sorbeoconcha, Potamididae, Cerithidea|HE680260|Kyushu, Kumamoto Pref., Hikawa, Japan  
*Cerithidea rhizophorarum*[Mollusca, Gastropoda, Sorbeoconcha, Potamididae, Cerithidea|HE680271|Hiroshima Pref., Kasaoka Bay, Japan  
*Cerithidea rhizophorarum*[Mollusca, Gastropoda, Sorbeoconcha, Potamididae, Cerithidea|JF694694|South China Sea  
*Cerithidea rhizophorarum*[Mollusca, Gastropoda, Sorbeoconcha, Potamididae, Cerithidea|HE680279|Nagasaki Pref., Isahaya Bay, Japan  
*Cerithidea rhizophorarum*[Mollusca, Gastropoda, Sorbeoconcha, Potamididae, Cerithidea|HE680259|Kyushu, Kumamoto Pref., Hikawa, Japan  
*Cerithidea rhizophorarum*[Mollusca, Gastropoda, Sorbeoconcha, Potamididae, Cerithidea|HE680264|Fukuoka Pref., Imazu Bay, Japan  
*Cerithidea rhizophorarum*[Mollusca, Gastropoda, Sorbeoconcha, Potamididae, Cerithidea|HE680283|Aichi Pref., Shiokawa, Japan  
*Cerithidea rhizophorarum*[Mollusca, Gastropoda, Sorbeoconcha, Potamididae, Cerithidea|HE680272|Hiroshima Pref., Kasaoka Bay, Japan,  
*Cerithidea rhizophorarum*[Mollusca, Gastropoda, Sorbeoconcha, Potamididae, Cerithidea|HE680269|Kagoshima Pref., Kiire, Japan  
*Cerithidea rhizophorarum*[Mollusca, Gastropoda, Sorbeoconcha, Potamididae, Cerithidea|HE680281|Nagasaki Pref., Isahaya Bay, Japan  
*Cerithidea rhizophorarum*[Mollusca, Gastropoda, Sorbeoconcha, Potamididae, Cerithidea|HE680267|Kagoshima Pref., Kiire, Japan  
*Cerithidea rhizophorarum*[Mollusca, Gastropoda, Sorbeoconcha, Potamididae, Cerithidea|HE680270|Kagoshima, Kiire, Japan  
*Cerithidea rhizophorarum*[Mollusca, Gastropoda, Sorbeoconcha, Potamididae, Cerithidea|HE680265|Fukuoka Pref., Imazu Bay, Japan  
*Cerithidea rhizophorarum*[Mollusca, Gastropoda, Sorbeoconcha, Potamididae, Cerithidea|HE680275|Hiroshima Pref., Kasaoka Bay, Japan,  
*Cerithidea rhizophorarum*[Mollusca, Gastropoda, Sorbeoconcha, Potamididae, Cerithidea|HE680280|Nagasaki Pref., Isahaya Bay, Japan  
*Cerithidea rhizophorarum*[Mollusca, Gastropoda, Sorbeoconcha, Potamididae, Cerithidea|HE680263|Fukuoka Pref., Imazu Bay, Japan  
*Cerithidea rhizophorarum*[Mollusca, Gastropoda, Sorbeoconcha, Potamididae, Cerithidea|HE680261|Fukuoka Pref., Imazu Bay, Japan  
*Cerithidea rhizophorarum*[Mollusca, Gastropoda, Sorbeoconcha, Potamididae, Cerithidea|HE680282|Nagasaki Pref., Isahaya Bay, Japan  
*Cerithidea rhizophorarum*[Mollusca, Gastropoda, Sorbeoconcha, Potamididae, Cerithidea|HE680257|Funaura, Japan  
*Cerithidea rhizophorarum*[Mollusca, Gastropoda, Sorbeoconcha, Potamididae, Cerithidea|JF694695|Taiwan Strait, Hsinchu, Taiwan, China  
*Cerithidea ornate*[Mollusca, Gastropoda, Sorbeoconcha, Potamididae, Cerithidea|HE680224|Hikawa, Kumamoto Pref., Kyushu, Japan  
*Cerithidea ornate*[Mollusca, Gastropoda, Sorbeoconcha, Potamididae, Cerithidea|HE680223|Hikawa, Kumamoto Pref., Kyushu, Japan  
*Cerithidea ornate*[Mollusca, Gastropoda, Sorbeoconcha, Potamididae, Cerithidea|AM932766|Mouth of Hikawa River, Hikawa Town, Kyushu, Japan  
*Cerithidea ornate*[Mollusca, Gastropoda, Sorbeoconcha, Potamididae, Cerithidea|HE680222|Hikawa, Kumamoto Pref., Kyushu, Japan  
*Cerithidea ornate*[Mollusca, Gastropoda, Sorbeoconcha, Potamididae, Cerithidea|AM932767|Sandybyakken, Japan  
*Cerithidea largillierti*[Mollusca, Gastropoda, Sorbeoconcha, Potamididae, Cerithidea|AM932789|Nagata, Ashikari Town, Japan  
*Clypeomorus trailii*[Mollusca, Gastropoda, Sorbeoconcha, Cerithiidae, Clypeomorus|JF693364|Beihai, Guangxi province, China  
*Clypeomorus trailii*[Mollusca, Gastropoda, Sorbeoconcha, Cerithiidae, Clypeomorus|JF693363|Beihai, Guangxi province, China

- 
- Drupa rubusidaeus*[Mollusca, Gastropoda, Neogastropoda, Muricidae, Drupa|HE584526|Okinawa, Japan  
*Drupa rubusidaeus*[Mollusca, Gastropoda, Neogastropoda, Muricidae, Drupa|HE584527|Kakeroma, Ryukyu Is, Japan  
*Drupa albolabris*[Mollusca, Gastropoda, Neogastropoda, Muricidae, Drupa|HE584498|Chichijima, Ogasawara Is, Japan  
*Drupa albolabris*[Mollusca, Gastropoda, Neogastropoda, Muricidae, Drupa|HE584499|Tsuchihama, Kasari, Amami, Japan  
*Drupa grossularia*[Mollusca, Gastropoda, Neogastropoda, Muricidae, Drupa|HE584488|Amami-O-Shima, Ryukyu Is, Japan  
*Cerithidea alata*[Mollusca, Gastropoda, Sorbeoconcha, Potamididae, Cerithidea|HE680311|Yokaku Bay, Kumamoto Pref., Japan  
*Cerithidea alata*[Mollusca, Gastropoda, Sorbeoconcha, Potamididae, Cerithidea|HE680310|Yokaku Bay, Kumamoto Pref., Japan  
*Cerithidea alata*[Mollusca, Gastropoda, Sorbeoconcha, Potamididae, Cerithidea|HE680308|Yokaku Bay, Kumamoto Pref., Japan  
*Cerithidea alata*[Mollusca, Gastropoda, Sorbeoconcha, Potamididae, Cerithidea|HE680309|Yokaku Bay, Kumamoto Pref., Japan  
*Cerithidea alata*[Mollusca, Gastropoda, Sorbeoconcha, Potamididae, Cerithidea|HE680306|Yokaku Bay, Kumamoto Pref., Japan  
*Cerithidea alata*[Mollusca, Gastropoda, Sorbeoconcha, Potamididae, Cerithidea|HE680305|Yokaku Bay, Kumamoto Pref., Japan  
*Cerithidea alata*[Mollusca, Gastropoda, Sorbeoconcha, Potamididae, Cerithidea|HE680304|Yokaku Bay, Kumamoto Pref., Japan  
*Cerithidea alata*[Mollusca, Gastropoda, Sorbeoconcha, Potamididae, Cerithidea|HE680307|Yokaku Bay, Kumamoto Pref., Japan  
*Cerithidea djadjariensis*[Mollusca, Gastropoda, Sorbeoconcha, Potamididae, Cerithidea|HE680554|Senaga-jima, Okinawa Pref., Okinawa, Japan  
*Cerithidea djadjariensis*[Mollusca, Gastropoda, Sorbeoconcha, Potamididae, Cerithidea|HE680553|Senaga-jima, Okinawa Pref., Okinawa, Japan  
*Cerithidea djadjariensis*[Mollusca, Gastropoda, Sorbeoconcha, Potamididae, Cerithidea|HE680581|Matsuzaka, Mie Pref., Japan  
*Cerithidea djadjariensis*[Mollusca, Gastropoda, Sorbeoconcha, Potamididae, Cerithidea|HE680570|Kiire, Kagoshima Pref., Japan  
*Cerithidea djadjariensis*[Mollusca, Gastropoda, Sorbeoconcha, Potamididae, Cerithidea|HE680582|Isahaya Bay, Nagasaki Pref., Japan  
*Cerithidea djadjariensis*[Mollusca, Gastropoda, Sorbeoconcha, Potamididae, Cerithidea|HE680557|Iriomote I., Ryukyu Is, Japan  
*Cerithidea djadjariensis*[Mollusca, Gastropoda, Sorbeoconcha, Potamididae, Cerithidea|HE680569|Hikawa, Kumamoto Pref., Kyushu, Japan  
*Cerithidea djadjariensis*[Mollusca, Gastropoda, Sorbeoconcha, Potamididae, Cerithidea|HE680568|Hikawa, Kumamoto Pref., Kyushu, Japan  
*Cerithidea djadjariensis*[Mollusca, Gastropoda, Sorbeoconcha, Potamididae, Cerithidea|HE680559|Hikawa, Kumamoto Pref., Kyushu, Japan  
*Cerithidea djadjariensis*[Mollusca, Gastropoda, Sorbeoconcha, Potamididae, Cerithidea|HE680563|Hikawa, Kumamoto Pref., Kyushu, Japan  
*Cerithidea djadjariensis*[Mollusca, Gastropoda, Sorbeoconcha, Potamididae, Cerithidea|HE680564|Hikawa, Kumamoto Pref., Kyushu, Japan  
*Cerithidea djadjariensis*[Mollusca, Gastropoda, Sorbeoconcha, Potamididae, Cerithidea|HE680565|Hikawa, Kumamoto Pref., Kyushu, Japan  
*Cerithidea djadjariensis*[Mollusca, Gastropoda, Sorbeoconcha, Potamididae, Cerithidea|HE680573|Matsuzaka, Mie Pref., Japan  
*Cerithidea djadjariensis*[Mollusca, Gastropoda, Sorbeoconcha, Potamididae, Cerithidea|HE680571|Kiire, Kagoshima Pref., Japan  
*Cerithidea djadjariensis*[Mollusca, Gastropoda, Sorbeoconcha, Potamididae, Cerithidea|HE680579|Matsuzaka, Mie Pref., Japan  
*Cerithidea djadjariensis*[Mollusca, Gastropoda, Sorbeoconcha, Potamididae, Cerithidea|HE680578|Matsuzaka, Mie Pref., Japan  
*Cerithidea djadjariensis*[Mollusca, Gastropoda, Sorbeoconcha, Potamididae, Cerithidea|HE680562|Hikawa, Kumamoto Pref., Kyushu, Japan  
*Cerithidea djadjariensis*[Mollusca, Gastropoda, Sorbeoconcha, Potamididae, Cerithidea|HE680560|Hikawa, Kumamoto Pref., Kyushu, Japan  
*Cerithidea djadjariensis*[Mollusca, Gastropoda, Sorbeoconcha, Potamididae, Cerithidea|HE680556|Isahaya Bay, Nagasaki Pref., Japan  
*Cerithidea djadjariensis*[Mollusca, Gastropoda, Sorbeoconcha, Potamididae, Cerithidea|HE680577|Matsuzaka, Mie Pref., Japan  
*Cerithidea djadjariensis*[Mollusca, Gastropoda, Sorbeoconcha, Potamididae, Cerithidea|HE680576|Matsuzaka, Mie Pref., Japan  
*Cerithidea djadjariensis*[Mollusca, Gastropoda, Sorbeoconcha, Potamididae, Cerithidea|HE680575|Matsuzaka, Mie Pref., Japan  
*Cerithidea djadjariensis*[Mollusca, Gastropoda, Sorbeoconcha, Potamididae, Cerithidea|HE680574|Matsuzaka, Mie Pref., Japan  
*Cerithidea djadjariensis*[Mollusca, Gastropoda, Sorbeoconcha, Potamididae, Cerithidea|HE680572|Matsuzaka, Mie Pref., Japan

*Cerithidea djadjariensis*[Mollusca, Gastropoda, Sorbeoconcha, Potamididae, Cerithidea|HE680567|Hikawa, Kumamoto Pref., Kyushu, Japan  
*Cerithidea djadjariensis*[Mollusca, Gastropoda, Sorbeoconcha, Potamididae, Cerithidea|HE680566|Hikawa, Kumamoto Pref., Kyushu, Japan  
*Cerithidea djadjariensis*[Mollusca, Gastropoda, Sorbeoconcha, Potamididae, Cerithidea|HE680561|Hikawa, Kumamoto Pref., Kyushu, Japan  
*Cerithidea djadjariensis*[Mollusca, Gastropoda, Sorbeoconcha, Potamididae, Cerithidea|HE680580|Matsuzaka, Mie Pref., Japan  
*Cerithidea djadjariensis*[Mollusca, Gastropoda, Sorbeoconcha, Potamididae, Cerithidea|HE680584|Kiire, Kagoshima Pref., Japan  
*Cerithidea djadjariensis*[Mollusca, Gastropoda, Sorbeoconcha, Potamididae, Cerithidea|HE680583|Isahaya Bay, Nagasaki Pref., Japan  
*Cerithidea djadjariensis*[Mollusca, Gastropoda, Sorbeoconcha, Potamididae, Cerithidea|HE680558|Iriomote I., Ryukyu Is, Japan

*Cerithidea cingulata*[Mollusca, Gastropoda, Sorbeoconcha, Potamididae, Cerithidea|HE680455|Yokakuwan, Kawaura, Kumamoto Pref., Japan  
*Cerithidea cingulata*[Mollusca, Gastropoda, Sorbeoconcha, Potamididae, Cerithidea|HE680454|Yokakuwan, Kawaura, Kumamoto Pref., Japan  
*Cerithidea cingulata*[Mollusca, Gastropoda, Sorbeoconcha, Potamididae, Cerithidea|HE680452|Tsuyazaki, Fukuoka Pref., Japan  
*Cerithidea cingulata*[Mollusca, Gastropoda, Sorbeoconcha, Potamididae, Cerithidea|HE680451|Tsuyazaki, Fukuoka Pref., Japan  
*Cerithidea cingulata*[Mollusca, Gastropoda, Sorbeoconcha, Potamididae, Cerithidea|HE680450|Tsuyazaki, Fukuoka Pref., Japan  
*Cerithidea cingulata*[Mollusca, Gastropoda, Sorbeoconcha, Potamididae, Cerithidea|HE680439|Tsuyazaki, Fukuoka Pref., Japan  
*Cerithidea cingulata*[Mollusca, Gastropoda, Sorbeoconcha, Potamididae, Cerithidea|HE680449|Tsuyazaki, Fukuoka Pref., Japan  
*Cerithidea cingulata*[Mollusca, Gastropoda, Sorbeoconcha, Potamididae, Cerithidea|HE680447|Tsuyazaki, Fukuoka Pref., Japan  
*Cerithidea cingulata*[Mollusca, Gastropoda, Sorbeoconcha, Potamididae, Cerithidea|HE680440|Tsuyazaki, Fukuoka Pref., Japan  
*Cerithidea cingulata*[Mollusca, Gastropoda, Sorbeoconcha, Potamididae, Cerithidea|HE680436|Tsuyazaki, Fukuoka Pref., Japan  
*Cerithidea cingulata*[Mollusca, Gastropoda, Sorbeoconcha, Potamididae, Cerithidea|HE680435|Tsuyazaki, Fukuoka Pref., Japan  
*Cerithidea cingulata*[Mollusca, Gastropoda, Sorbeoconcha, Potamididae, Cerithidea|HE680434|Tsuyazaki, Fukuoka Pref., Japan  
*Cerithidea cingulata*[Mollusca, Gastropoda, Sorbeoconcha, Potamididae, Cerithidea|HE680446|Tsuyazaki, Fukuoka Pref., Japan  
*Cerithidea cingulata*[Mollusca, Gastropoda, Sorbeoconcha, Potamididae, Cerithidea|HE680445|Tsuyazaki, Fukuoka Pref., Japan  
*Cerithidea cingulata*[Mollusca, Gastropoda, Sorbeoconcha, Potamididae, Cerithidea|HE680444|Tsuyazaki, Fukuoka Pref., Japan  
*Cerithidea cingulata*[Mollusca, Gastropoda, Sorbeoconcha, Potamididae, Cerithidea|HE680443|Tsuyazaki, Fukuoka Pref., Japan  
*Cerithidea cingulata*[Mollusca, Gastropoda, Sorbeoconcha, Potamididae, Cerithidea|HE680448|Tsuyazaki, Fukuoka Pref., Japan  
*Cerithidea cingulata*[Mollusca, Gastropoda, Sorbeoconcha, Potamididae, Cerithidea|HE680438|Tsuyazaki, Fukuoka Pref., Japan  
*Cerithidea cingulata*[Mollusca, Gastropoda, Sorbeoconcha, Potamididae, Cerithidea|HE680437|Tsuyazaki, Fukuoka Pref., Japan  
*Cerithidea cingulata*[Mollusca, Gastropoda, Sorbeoconcha, Potamididae, Cerithidea|HE680442|Tsuyazaki, Fukuoka Pref., Japan  
*Cerithidea cingulata*[Mollusca, Gastropoda, Sorbeoconcha, Potamididae, Cerithidea|HE680441|Tsuyazaki, Fukuoka Pref., Japan  
*Cerithidea cingulata*[Mollusca, Gastropoda, Sorbeoconcha, Potamididae, Cerithidea|HE680433|Shioya Bay, Okinawa, Okinawa, Japan  
*Cerithidea cingulata*[Mollusca, Gastropoda, Sorbeoconcha, Potamididae, Cerithidea|HE680432|Shioya Bay, Okinawa, Okinawa, Japan  
*Turritella terebra*[Mollusca, Gastropoda, Sorbeoconcha, Turritellidae, Turritella|JF693447|Lianyungang, Jiangsu province, China  
*Turritella terebra*[Mollusca, Gastropoda, Sorbeoconcha, Turritellidae, Turritella|JF693445|Ningde, Fujian province, China  
*Turritella terebra*[Mollusca, Gastropoda, Sorbeoconcha, Turritellidae, Turritella|JF693444|Wenzhou, Zhejiang province, China  
*Turritella terebra*[Mollusca, Gastropoda, Sorbeoconcha, Turritellidae, Turritella|JF693443|Beihai, Guangxi province, China  
*Turritella terebra*[Mollusca, Gastropoda, Sorbeoconcha, Turritellidae, Turritella|JF693446|Beihai, Guangxi province, China  
*Mauritia arabica*[Mollusca, Gastropoda, Littorinimorpha, Cypraeidae, Erronea|JF693395|Lingao, Hainan province, China  
*Mauritia arabica*[Mollusca, Gastropoda, Littorinimorpha, Cypraeidae, Erronea|JF693394|Lingao, Hainan province, China

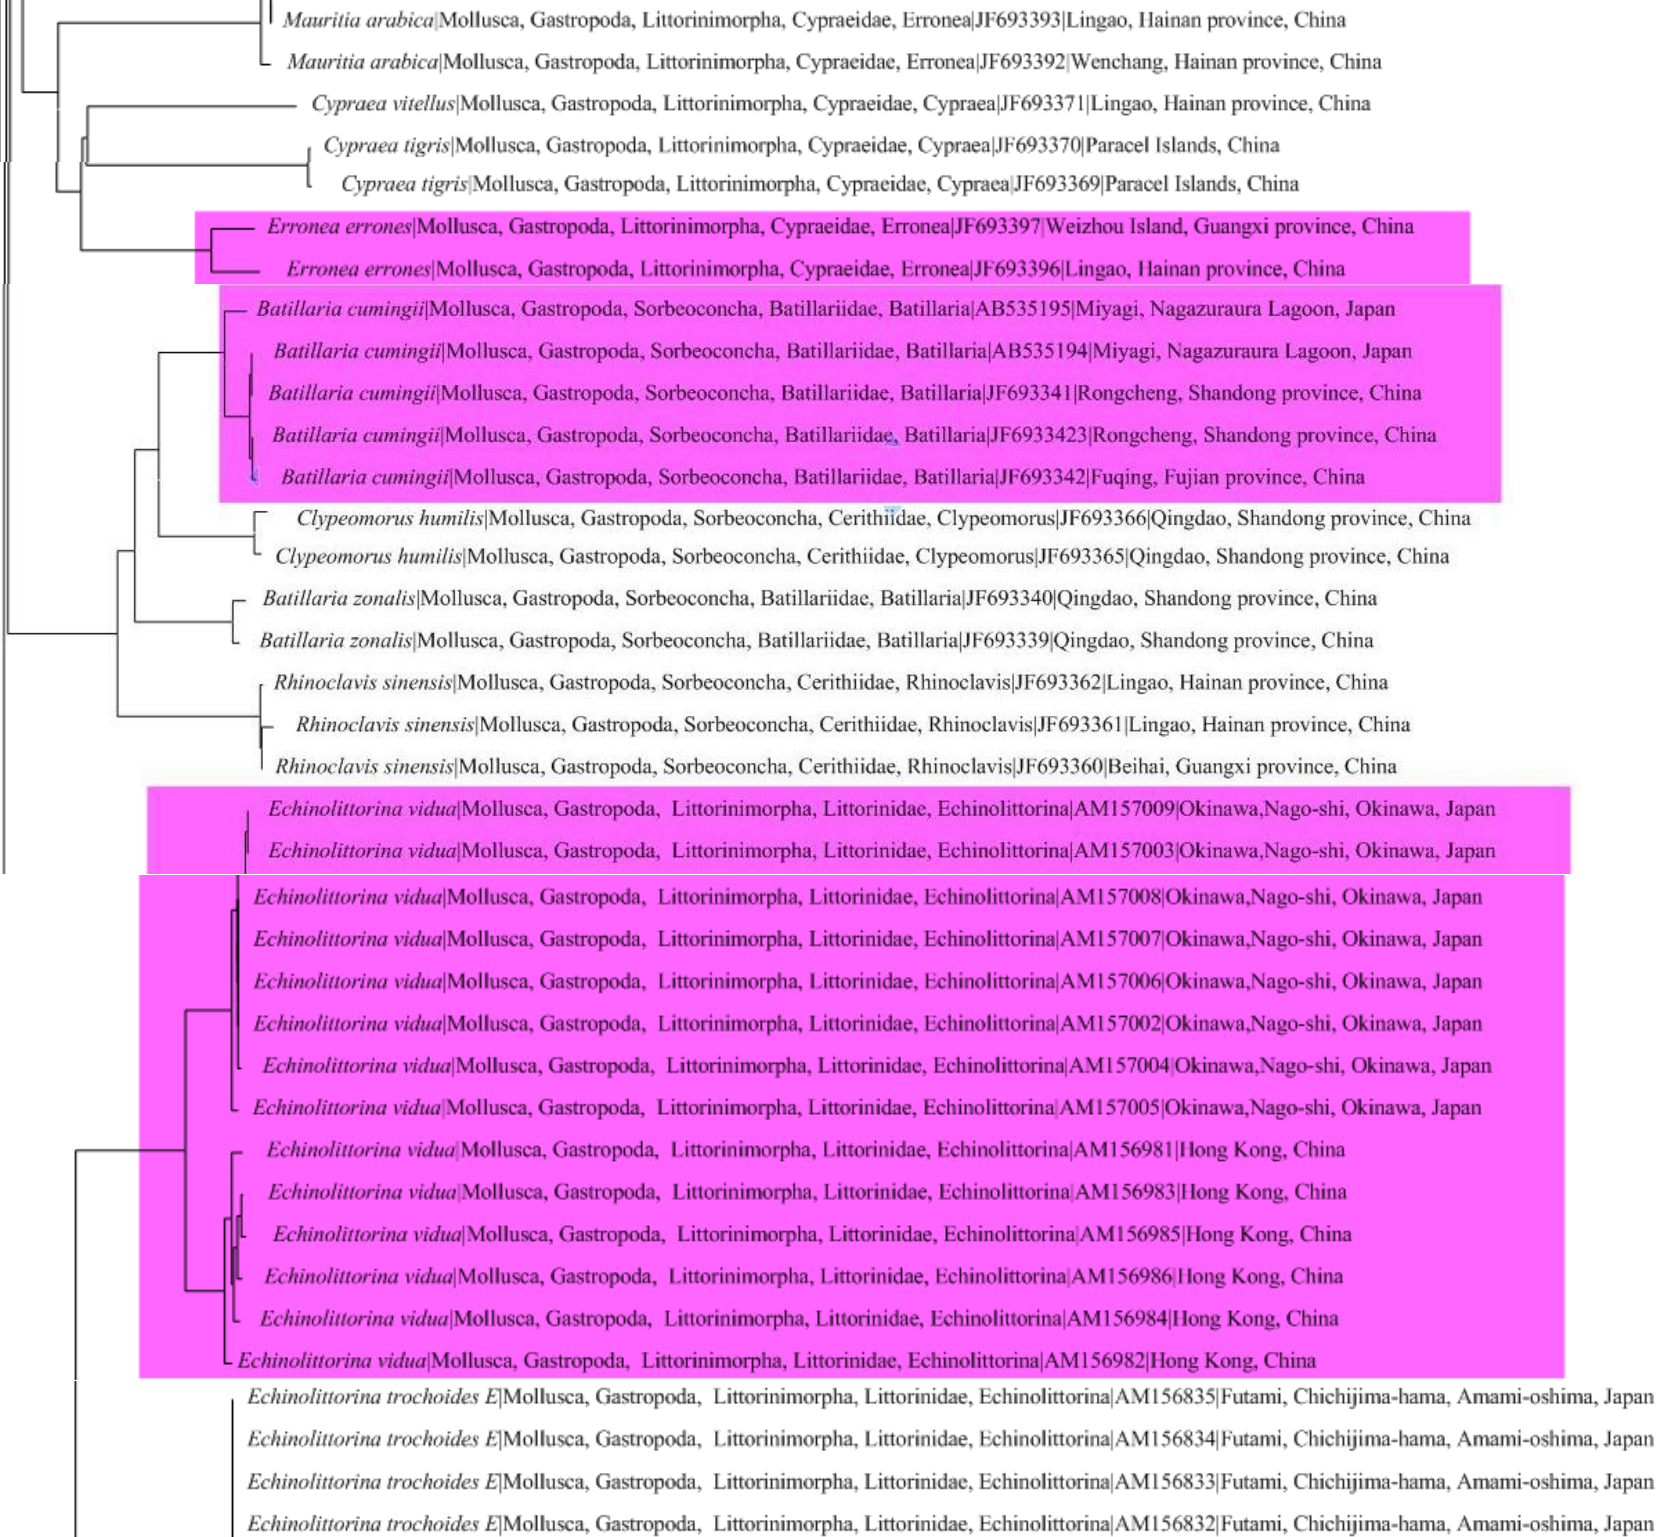



*Echinolittorina trochoides* E[Mollusca, Gastropoda, Littorinimorpha, Littorinidae, Echinolittorina|AM156827|Shirahama, Wakayama, Japan  
*Echinolittorina trochoides* E[Mollusca, Gastropoda, Littorinimorpha, Littorinidae, Echinolittorina|AM156824|Nakazato, Kikaijima, Kagoshima, Japan  
*Echinolittorina trochoides* E[Mollusca, Gastropoda, Littorinimorpha, Littorinidae, Echinolittorina|AM156821|Nago-shi, Okinawa, Okinawa, Japan  
*Echinolittorina trochoides* E[Mollusca, Gastropoda, Littorinimorpha, Littorinidae, Echinolittorina|AM156820|Nago-shi, Okinawa, Okinawa, Japan  
*Echinolittorina trochoides* E[Mollusca, Gastropoda, Littorinimorpha, Littorinidae, Echinolittorina|AM156819|Mitsuishi, Kanagawa, Japan  
*Echinolittorina trochoides* E[Mollusca, Gastropoda, Littorinimorpha, Littorinidae, Echinolittorina|AJ623058|Japan  
*Echinolittorina trochoides* E[Mollusca, Gastropoda, Littorinimorpha, Littorinidae, Echinolittorina|AJ623057|Tsubaki, Wakayama, Japan  
*Echinolittorina trochoides* E[Mollusca, Gastropoda, Littorinimorpha, Littorinidae, Echinolittorina|AM156828|Mitsune, Hachijo-jima, Japan  
*Echinolittorina trochoides* E[Mollusca, Gastropoda, Littorinimorpha, Littorinidae, Echinolittorina|AM156823|Nakazato, Kikaijima, Kagoshima, Japan  
*Echinolittorina trochoides* E[Mollusca, Gastropoda, Littorinimorpha, Littorinidae, Echinolittorina|AM156825|Nakazato, Kikaijima, Kagoshima, Japan  
*Echinolittorina trochoides* E[Mollusca, Gastropoda, Littorinimorpha, Littorinidae, Echinolittorina|AM156818|Mitsuishi, Kanagawa, Japan  
*Echinolittorina trochoides* E[Mollusca, Gastropoda, Littorinimorpha, Littorinidae, Echinolittorina|AM156826|Shirahama, Wakayama, Japan  
*Echinolittorina trochoides* E[Mollusca, Gastropoda, Littorinimorpha, Littorinidae, Echinolittorina|AM156830|Mitsune, Hachijo-jima, Japan  
*Echinolittorina trochoides* E[Mollusca, Gastropoda, Littorinimorpha, Littorinidae, Echinolittorina|AM156822|Nago-shi, Okinawa, Okinawa, Japan  
*Echinolittorina trochoides* E[Mollusca, Gastropoda, Littorinimorpha, Littorinidae, Echinolittorina|AM156831|Tsuchi-hama, Amami-oshima, Japan  
*Echinolittorina trochoides* E[Mollusca, Gastropoda, Littorinimorpha, Littorinidae, Echinolittorina|AM156829|Mitsune, Hachijo-jima, Japan  
*Echinolittorina trochoides* E[Mollusca, Gastropoda, Littorinimorpha, Littorinidae, Echinolittorina|AM156817|Japan  
*Echinolittorina trochoides* A[Mollusca, Gastropoda, Littorinimorpha, Littorinidae, Echinolittorina|AM157086|Hong Kong, China  
*Echinolittorina radiata* [Mollusca, Gastropoda, Littorinimorpha, Littorinidae, Echinolittorina|AJ623040|Tsubaki, Wakayama, Japan  
*Echinolittorina radiata* [Mollusca, Gastropoda, Littorinimorpha, Littorinidae, Echinolittorina|JF693405|Shengshan, Zhejiang province, China  
*Echinolittorina radiata* [Mollusca, Gastropoda, Littorinimorpha, Littorinidae, Echinolittorina|JF693406|Zhoushan, Zhejiang province, China  
*Echinolittorina reticulata* [Mollusca, Gastropoda, Littorinimorpha, Littorinidae, Echinolittorina|AM157067|Ishigaki, Japan  
*Echinolittorina reticulata* [Mollusca, Gastropoda, Littorinimorpha, Littorinidae, Echinolittorina|AM157061|Okinawa, Nago-shi, Okinawa, Japan  
*Echinolittorina reticulata* [Mollusca, Gastropoda, Littorinimorpha, Littorinidae, Echinolittorina|AJ623042|Ishigaki, Japan  
*Echinolittorina reticulata* [Mollusca, Gastropoda, Littorinimorpha, Littorinidae, Echinolittorina|AM157065|Ishigaki, Japan  
*Echinolittorina reticulata* [Mollusca, Gastropoda, Littorinimorpha, Littorinidae, Echinolittorina|AM157064|Ishigaki, Japan  
*Echinolittorina reticulata* [Mollusca, Gastropoda, Littorinimorpha, Littorinidae, Echinolittorina|AM157063|Hachijo-jima, Mitsune, Japan  
*Echinolittorina reticulata* [Mollusca, Gastropoda, Littorinimorpha, Littorinidae, Echinolittorina|AM157060|Okinawa, Nago-shi, Okinawa, Japan  
*Echinolittorina reticulata* [Mollusca, Gastropoda, Littorinimorpha, Littorinidae, Echinolittorina|AM157058|Okinawa, Nago-shi, Okinawa, Japan  
*Echinolittorina reticulata* [Mollusca, Gastropoda, Littorinimorpha, Littorinidae, Echinolittorina|AM157057|Okinawa, Nago-shi, Okinawa, Japan  
*Echinolittorina reticulata* [Mollusca, Gastropoda, Littorinimorpha, Littorinidae, Echinolittorina|AM157059|Okinawa, Nago-shi, Okinawa, Japan  
*Echinolittorina reticulata* [Mollusca, Gastropoda, Littorinimorpha, Littorinidae, Echinolittorina|AM157062|Okinawa, Nago-shi, Okinawa, Japan  
*Echinolittorina reticulata* [Mollusca, Gastropoda, Littorinimorpha, Littorinidae, Echinolittorina|AM157066|Ishigaki, Japan  
*Echinolittorina cinerea* [Mollusca, Gastropoda, Littorinimorpha, Littorinidae, Echinolittorina|AJ622991|Ishigaki, Japan  
*Tectarius spinulosus* [Mollusca, Gastropoda, Littorinimorpha, Littorinidae, Tectarius|AB611827|Kagoshima, Japan  
*Tectarius spinulosus* [Mollusca, Gastropoda, Littorinimorpha, Littorinidae, Tectarius|AJ488641|Ishigaki Island, Japan  
*Littoraria coccinea* [Mollusca, Gastropoda, Littorinimorpha, Littorinidae, Littoraria|FN557093|Ishigaki I., Japan  
*Littoraria intermedia* [Mollusca, Gastropoda, Littorinimorpha, Littorinidae, Littoraria|FN557104|Kyushu, Miyazaki, Kushima, Honjo R., Japan  
*Littoraria scabra* [Mollusca, Gastropoda, Littorinimorpha, Littorinidae, Littoraria|FN557135|Naha, Okinawa, Japan

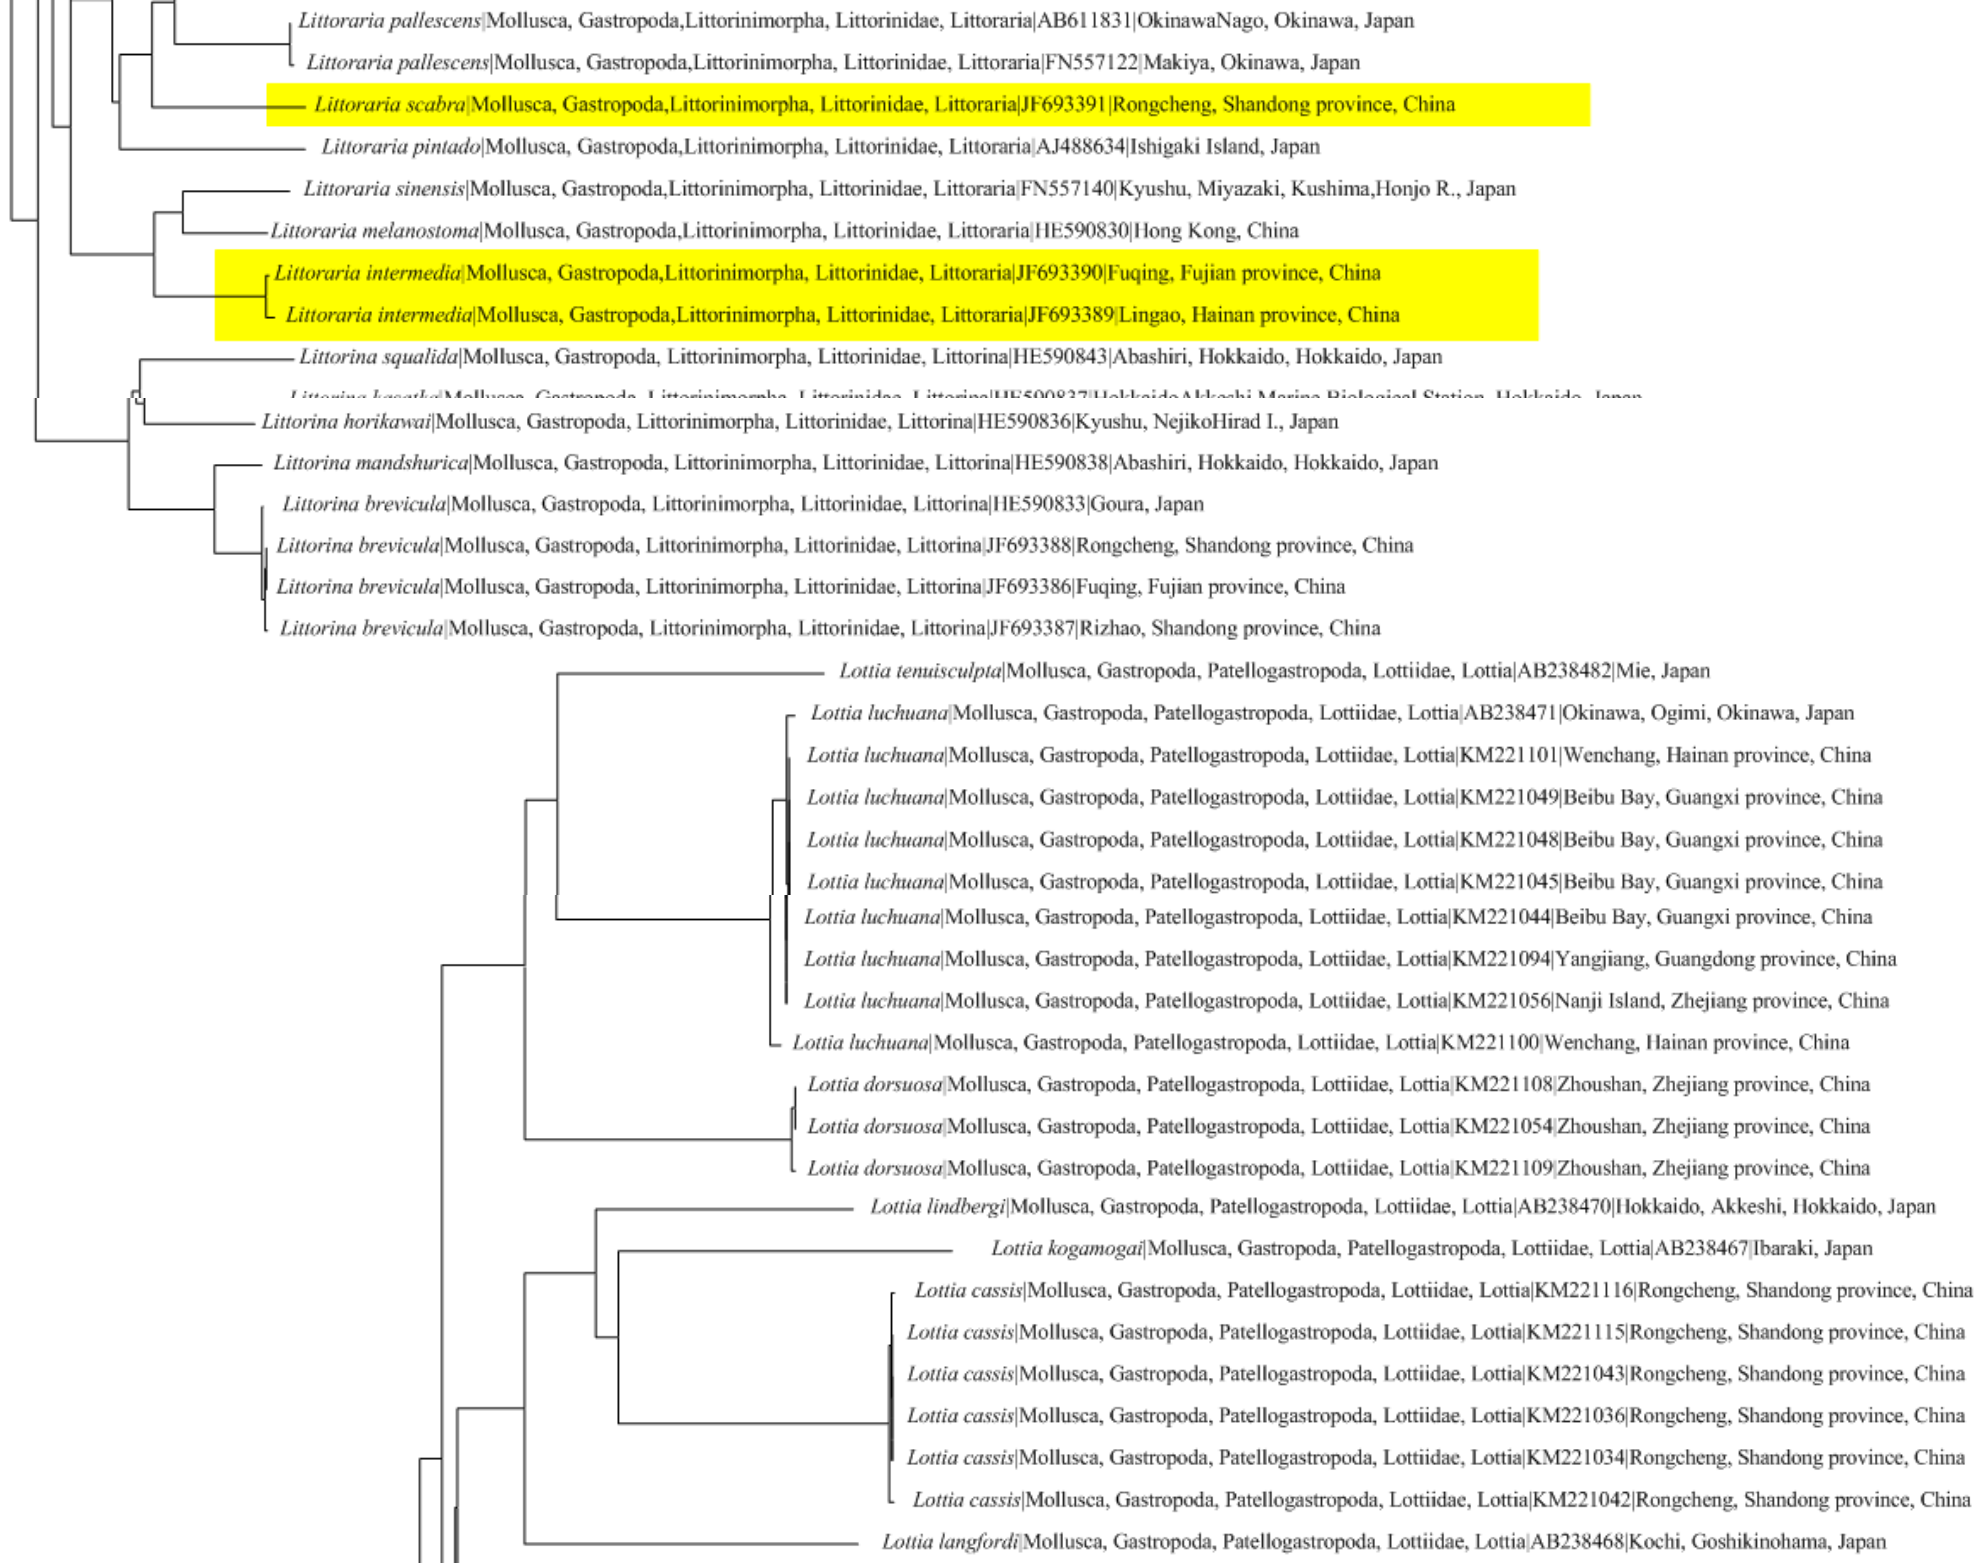

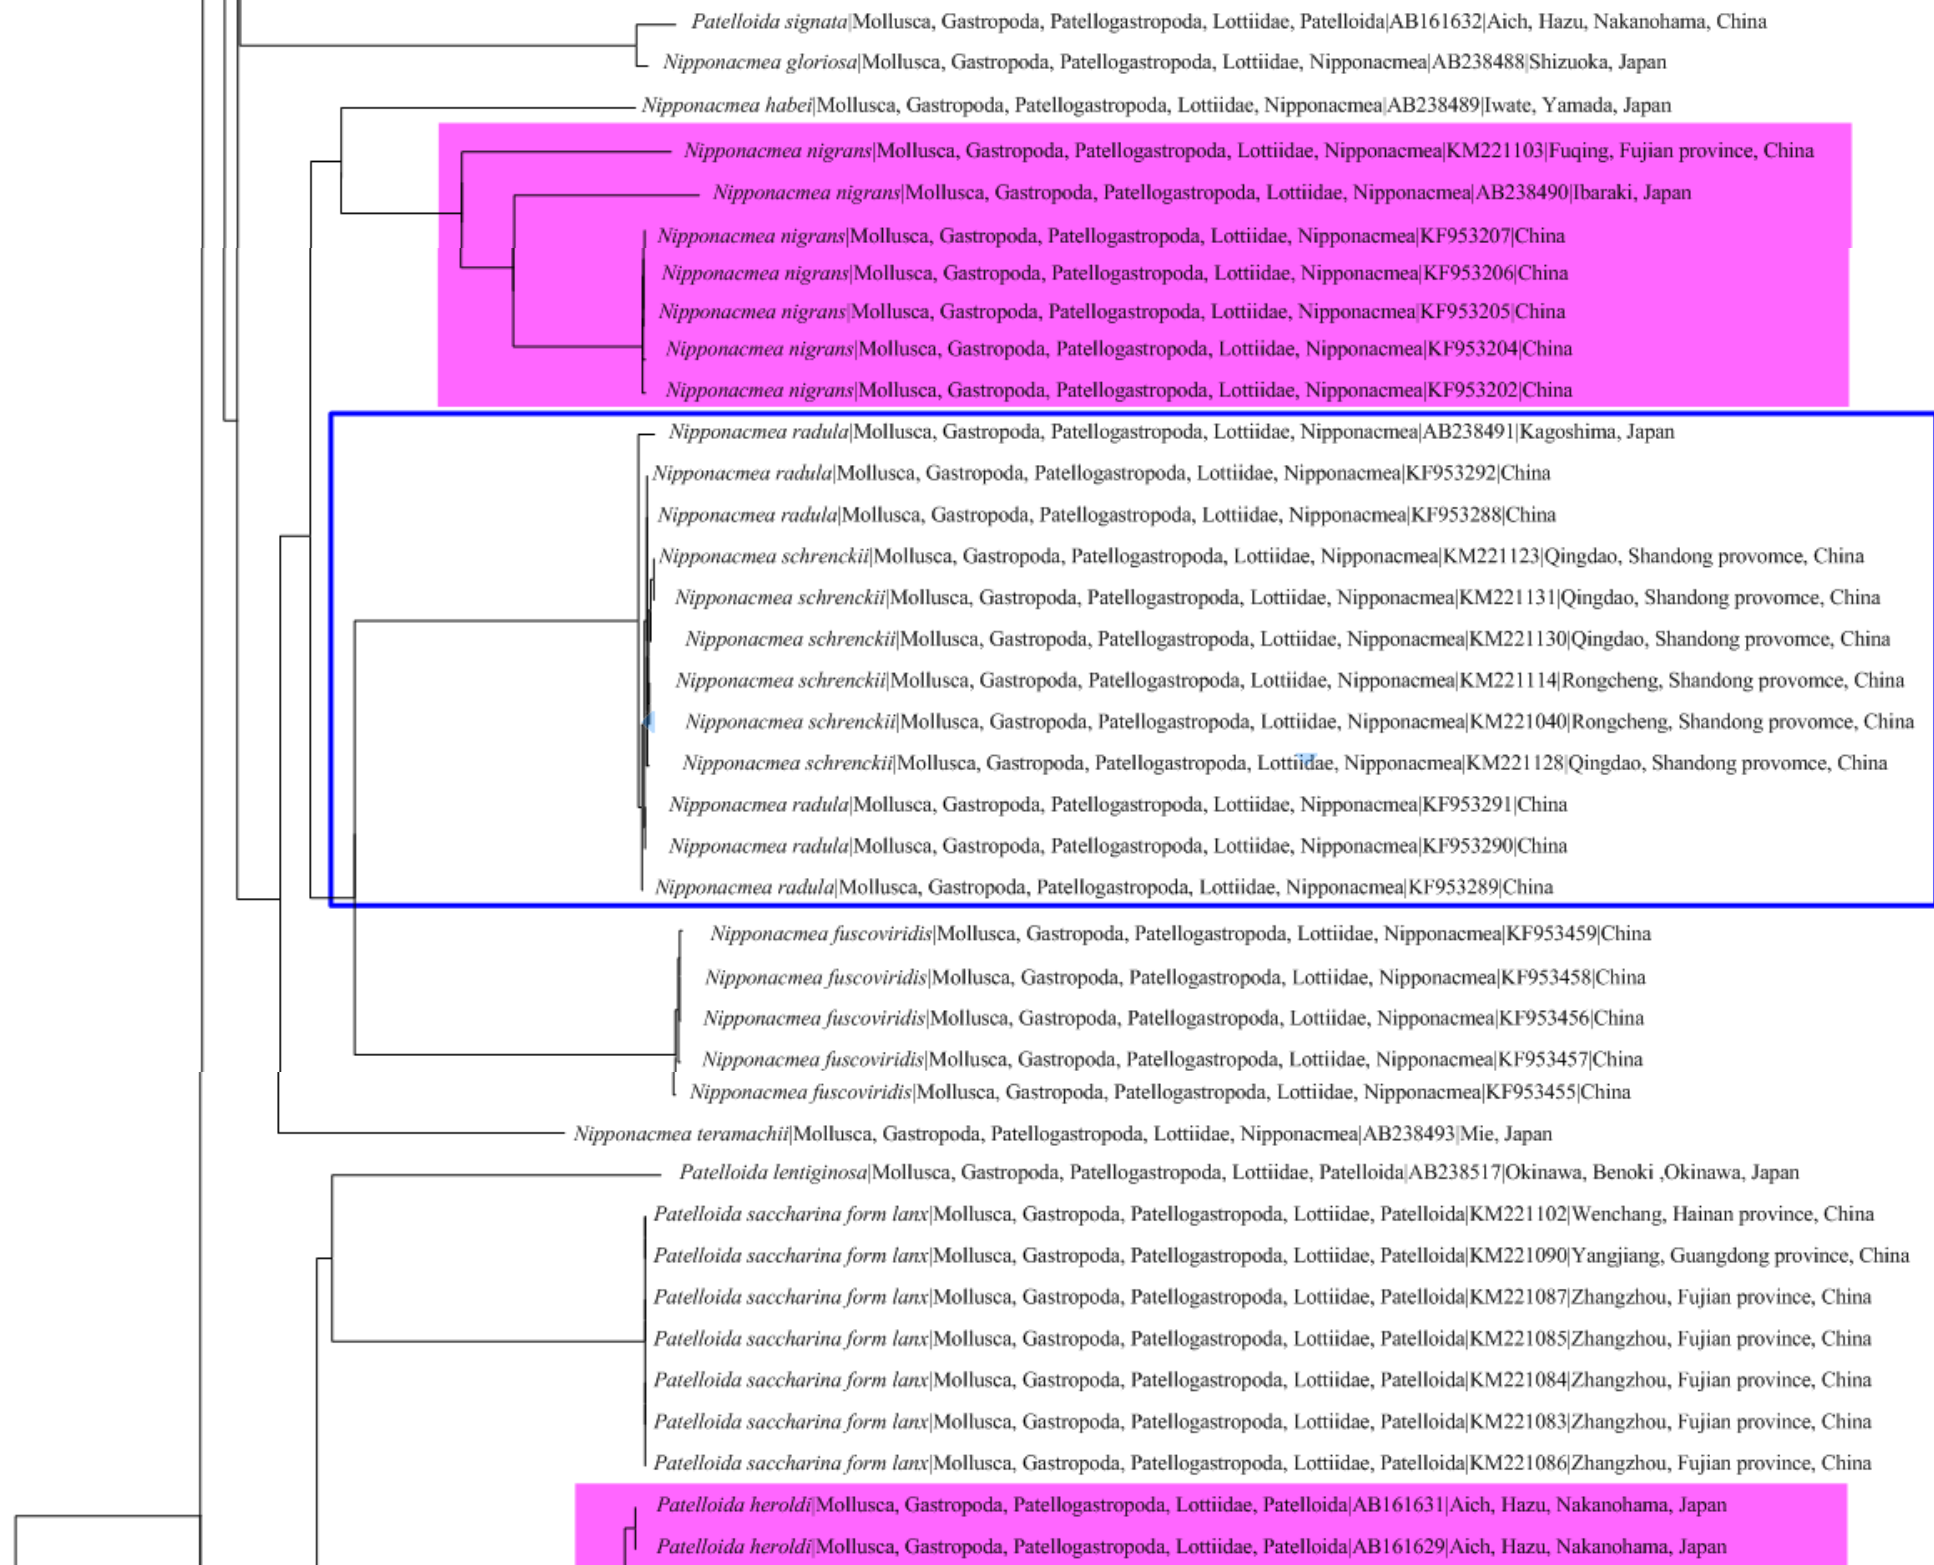

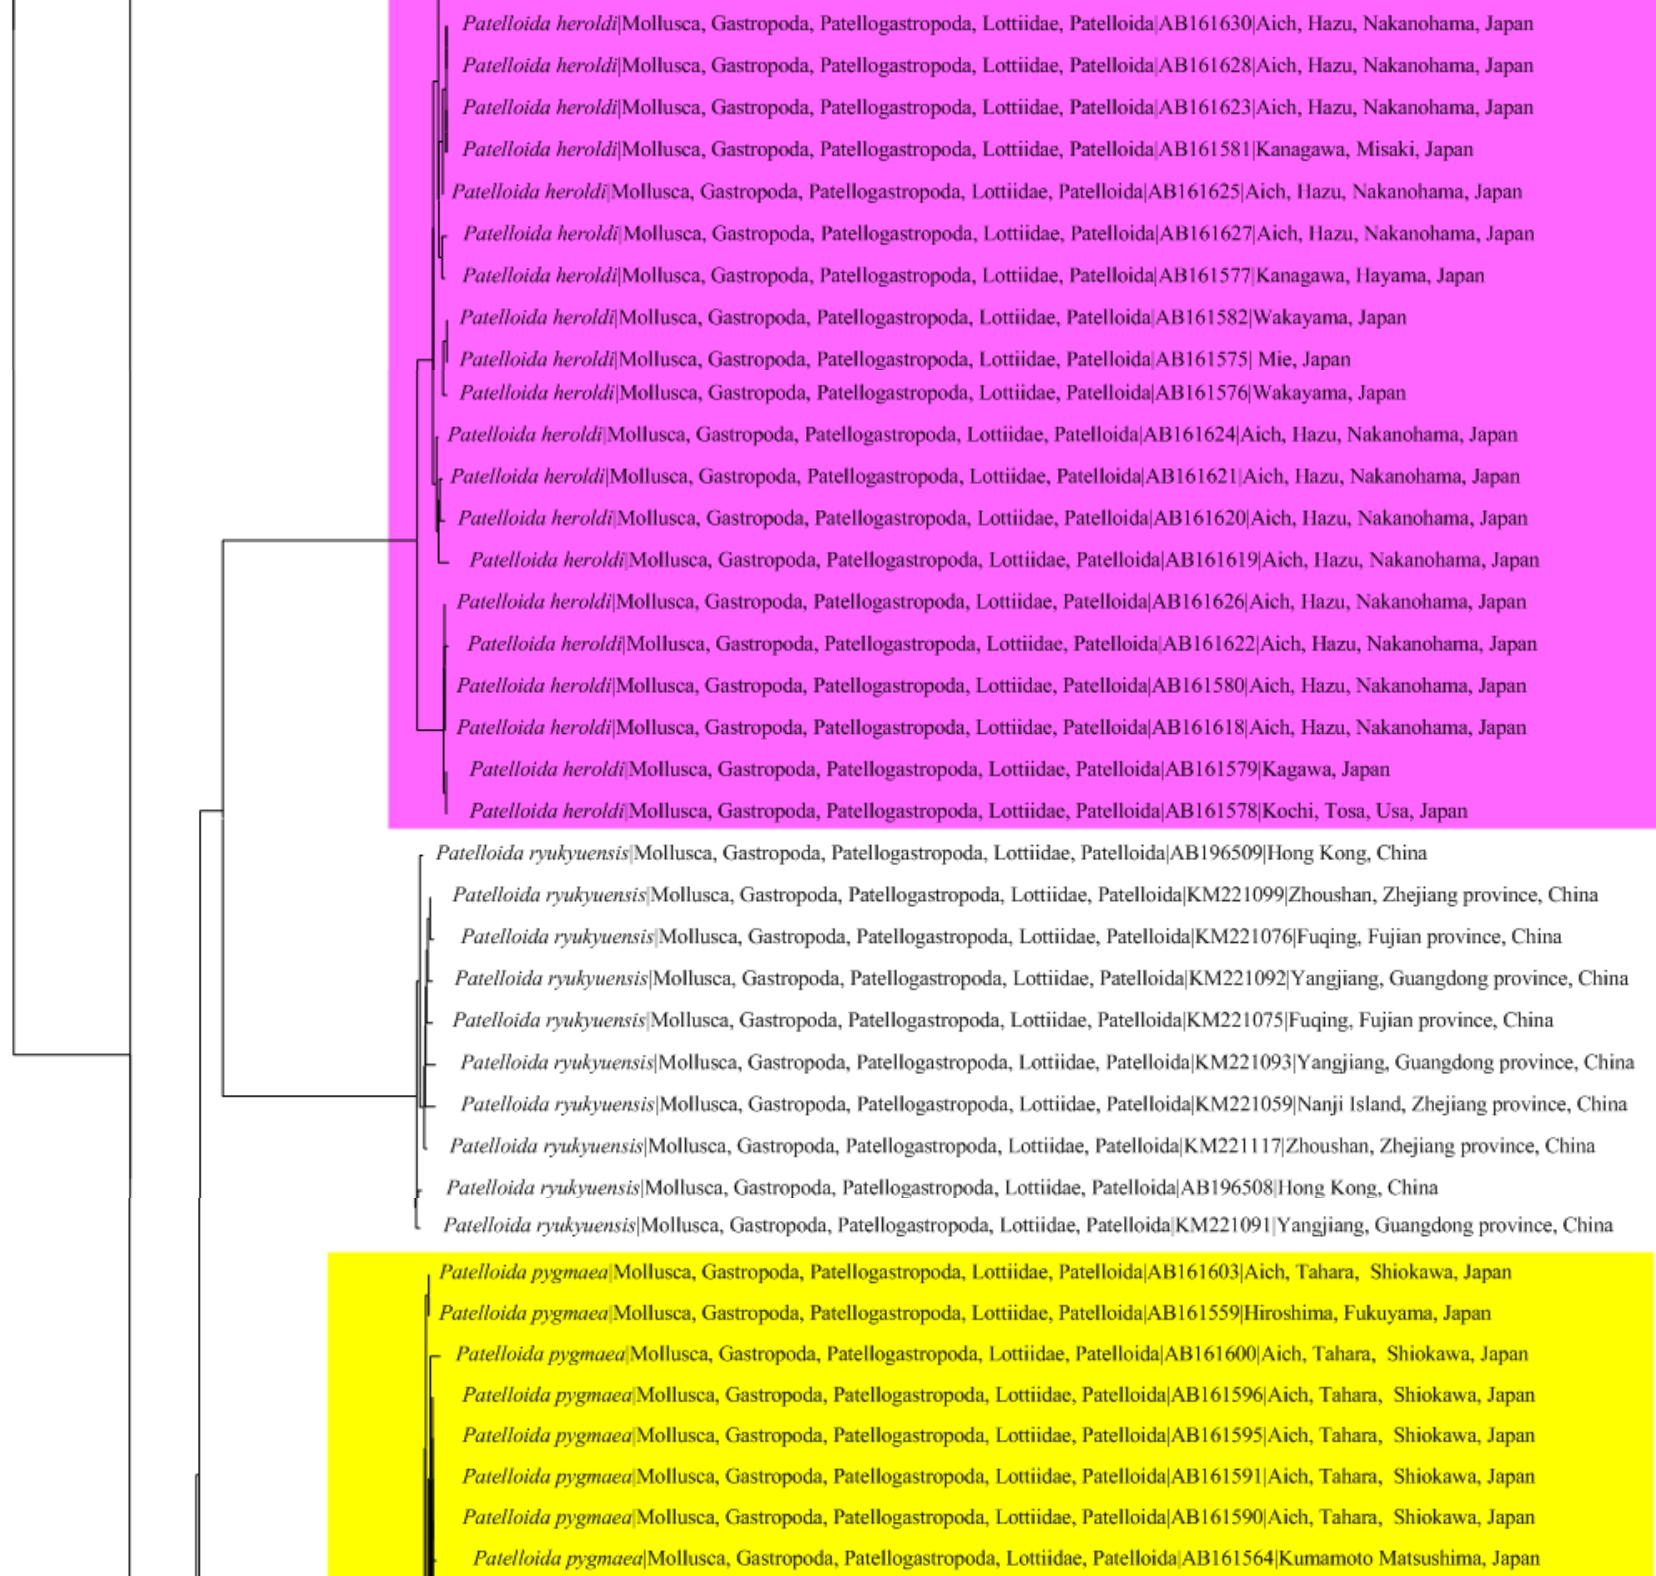

*Patelloida pygmaea*|Mollusca, Gastropoda, Patellogastropoda, Lottiidae, Patelloida|AB161563|Kumamoto, Kawaura, Japan  
*Patelloida pygmaea*|Mollusca, Gastropoda, Patellogastropoda, Lottiidae, Patelloida|AB161557|Chiba, Japan  
*Patelloida pygmaea*|Mollusca, Gastropoda, Patellogastropoda, Lottiidae, Patelloida|AB161552|Aich, Tahara, Shiokawa, Japan  
*Patelloida pygmaea*|Mollusca, Gastropoda, Patellogastropoda, Lottiidae, Patelloida|AB161597|Aich, Tahara, Shiokawa, Japan  
*Patelloida pygmaea*|Mollusca, Gastropoda, Patellogastropoda, Lottiidae, Patelloida|AB161601|Aich, Tahara, Shiokawa, Japan  
*Patelloida pygmaea*|Mollusca, Gastropoda, Patellogastropoda, Lottiidae, Patelloida|AB161592|Aich, Tahara, Shiokawa, Japan  
*Patelloida pygmaea*|Mollusca, Gastropoda, Patellogastropoda, Lottiidae, Patelloida|AB161594|Aich, Tahara, Shiokawa, Japan  
*Patelloida pygmaea*|Mollusca, Gastropoda, Patellogastropoda, Lottiidae, Patelloida|AB161593|Aich, Tahara, Shiokawa, Japan  
*Patelloida pygmaea*|Mollusca, Gastropoda, Patellogastropoda, Lottiidae, Patelloida|AB161562|Kumamoto, Hondo, Japan  
*Patelloida pygmaea*|Mollusca, Gastropoda, Patellogastropoda, Lottiidae, Patelloida|AB161602|Aich, Tahara, Shiokawa, Japan  
*Patelloida pygmaea*|Mollusca, Gastropoda, Patellogastropoda, Lottiidae, Patelloida|AB161561|Fukuoka, Tsuyazaki, Japan  
*Patelloida pygmaea*|Mollusca, Gastropoda, Patellogastropoda, Lottiidae, Patelloida|AB161555|Ehime, Misho, Japan  
*Patelloida pygmaea*|Mollusca, Gastropoda, Patellogastropoda, Lottiidae, Patelloida|AB161553|Yamaguchi, Esaki, Japan  
*Patelloida pygmaea*|Mollusca, Gastropoda, Patellogastropoda, Lottiidae, Patelloida|AB161556|Nagasaki, Tsushima, Japan  
*Patelloida pygmaea*|Mollusca, Gastropoda, Patellogastropoda, Lottiidae, Patelloida|AB161558|Okayama, Japan  
*Patelloida pygmaea*|Mollusca, Gastropoda, Patellogastropoda, Lottiidae, Patelloida|AB161560|Wakayama, Japan  
*Patelloida pygmaea*|Mollusca, Gastropoda, Patellogastropoda, Lottiidae, Patelloida|AB161554|Fukushima, Japan  
*Patelloida pygmaea*|Mollusca, Gastropoda, Patellogastropoda, Lottiidae, Patelloida|KM221150|Qingdao, Shandong province, China  
*Patelloida pygmaea*|Mollusca, Gastropoda, Patellogastropoda, Lottiidae, Patelloida|KM221149|Qingdao, Shandong province, China  
*Patelloida pygmaea*|Mollusca, Gastropoda, Patellogastropoda, Lottiidae, Patelloida|KM221148|Qingdao, Shandong province, China  
*Patelloida pygmaea*|Mollusca, Gastropoda, Patellogastropoda, Lottiidae, Patelloida|KM221147|Qingdao, Shandong province, China  
*Patelloida pygmaea*|Mollusca, Gastropoda, Patellogastropoda, Lottiidae, Patelloida|KM221041|Rongcheng, Shandong province, China  
*Patelloida pygmaea*|Mollusca, Gastropoda, Patellogastropoda, Lottiidae, Patelloida|KM221113|Yantai, Shandong province, China  
*Patelloida pygmaea*|Mollusca, Gastropoda, Patellogastropoda, Lottiidae, Patelloida|KM221033|Yantai, Shandong province, China  
*Patelloida pygmaea*|Mollusca, Gastropoda, Patellogastropoda, Lottiidae, Patelloida|KM221111|Yantai, Shandong province, China  
*Patelloida pygmaea*|Mollusca, Gastropoda, Patellogastropoda, Lottiidae, Patelloida|KM221112|Yantai, Shandong province, China  
*Patelloida conulus*|Mollusca, Gastropoda, Patellogastropoda, Lottiidae, Patelloida|AB238514|Aich, Tahara, Japan  
*Patelloida conulus*|Mollusca, Gastropoda, Patellogastropoda, Lottiidae, Patelloida|AB161616|Aich, Tahara, Shiokawa, Japan  
*Patelloida conulus*|Mollusca, Gastropoda, Patellogastropoda, Lottiidae, Patelloida|AB161571|Nagasaki, Minamikushiyama, Japan  
*Patelloida conulus*|Mollusca, Gastropoda, Patellogastropoda, Lottiidae, Patelloida|AB161567|Oita, Japan  
*Patelloida conulus*|Mollusca, Gastropoda, Patellogastropoda, Lottiidae, Patelloida|AB161565|Aich, Tahara, Shiokawa, Japan  
*Patelloida conulus*|Mollusca, Gastropoda, Patellogastropoda, Lottiidae, Patelloida|AB161604|Aich, Tahara, Shiokawa, Japan  
*Patelloida conulus*|Mollusca, Gastropoda, Patellogastropoda, Lottiidae, Patelloida|AB161615|Aich, Tahara, Shiokawa, Japan  
*Patelloida conulus*|Mollusca, Gastropoda, Patellogastropoda, Lottiidae, Patelloida|AB161569|Kumamoto Matsushima, Japan  
*Patelloida conulus*|Mollusca, Gastropoda, Patellogastropoda, Lottiidae, Patelloida|AB161570|Kumamoto, Hondo, Japan  
*Patelloida conulus*|Mollusca, Gastropoda, Patellogastropoda, Lottiidae, Patelloida|AB161617|Aich, Tahara, Shiokawa, Japan  
*Patelloida conulus*|Mollusca, Gastropoda, Patellogastropoda, Lottiidae, Patelloida|AB161614|Aich, Tahara, Shiokawa, Japan  
*Patelloida conulus*|Mollusca, Gastropoda, Patellogastropoda, Lottiidae, Patelloida|AB161612|Aich, Tahara, Shiokawa, Japan  
*Patelloida conulus*|Mollusca, Gastropoda, Patellogastropoda, Lottiidae, Patelloida|AB161605|Aich, Tahara, Shiokawa, Japan

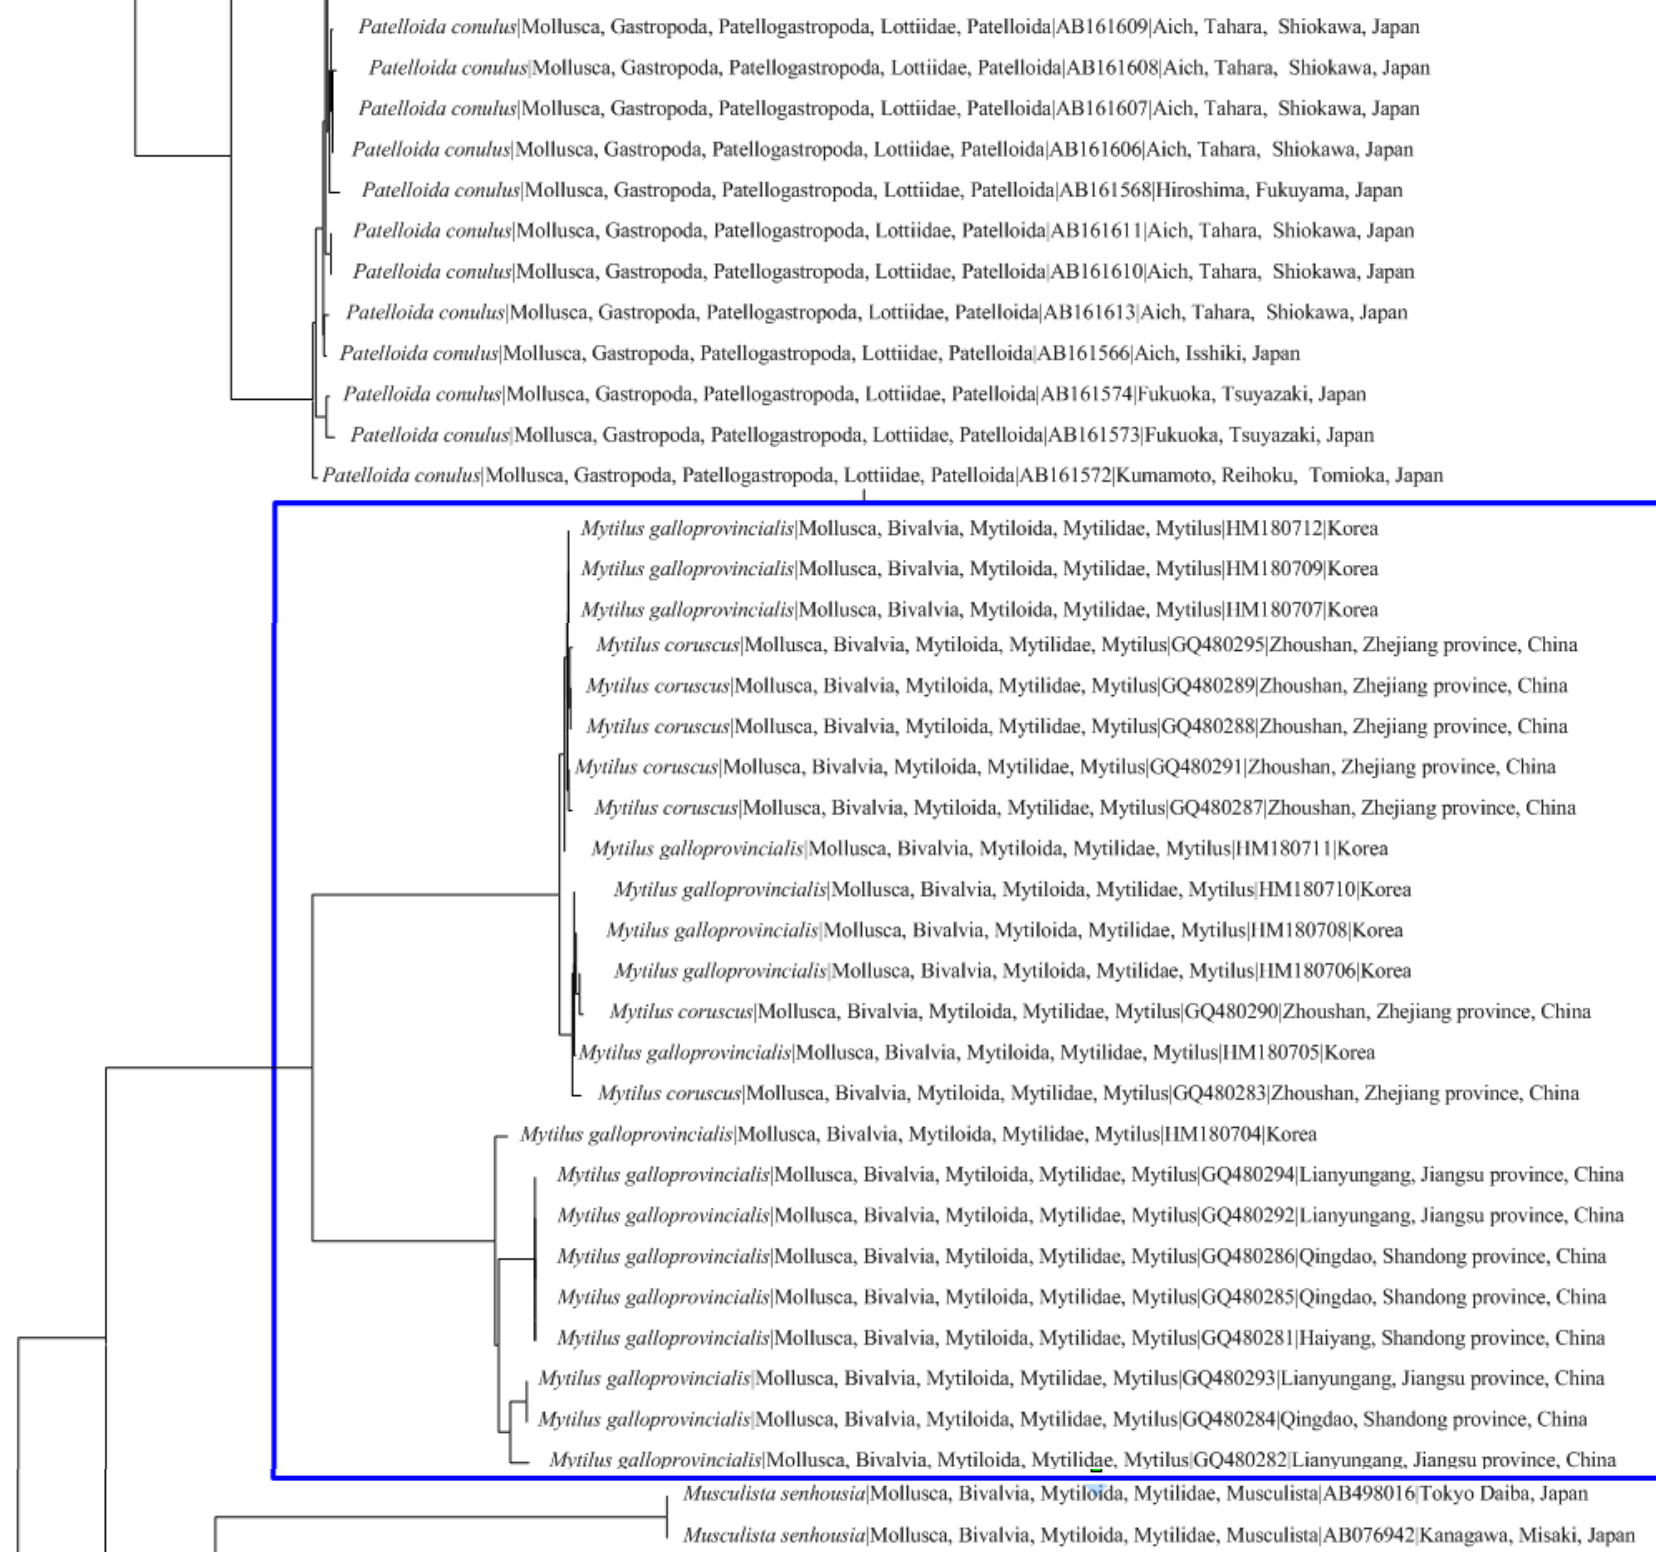

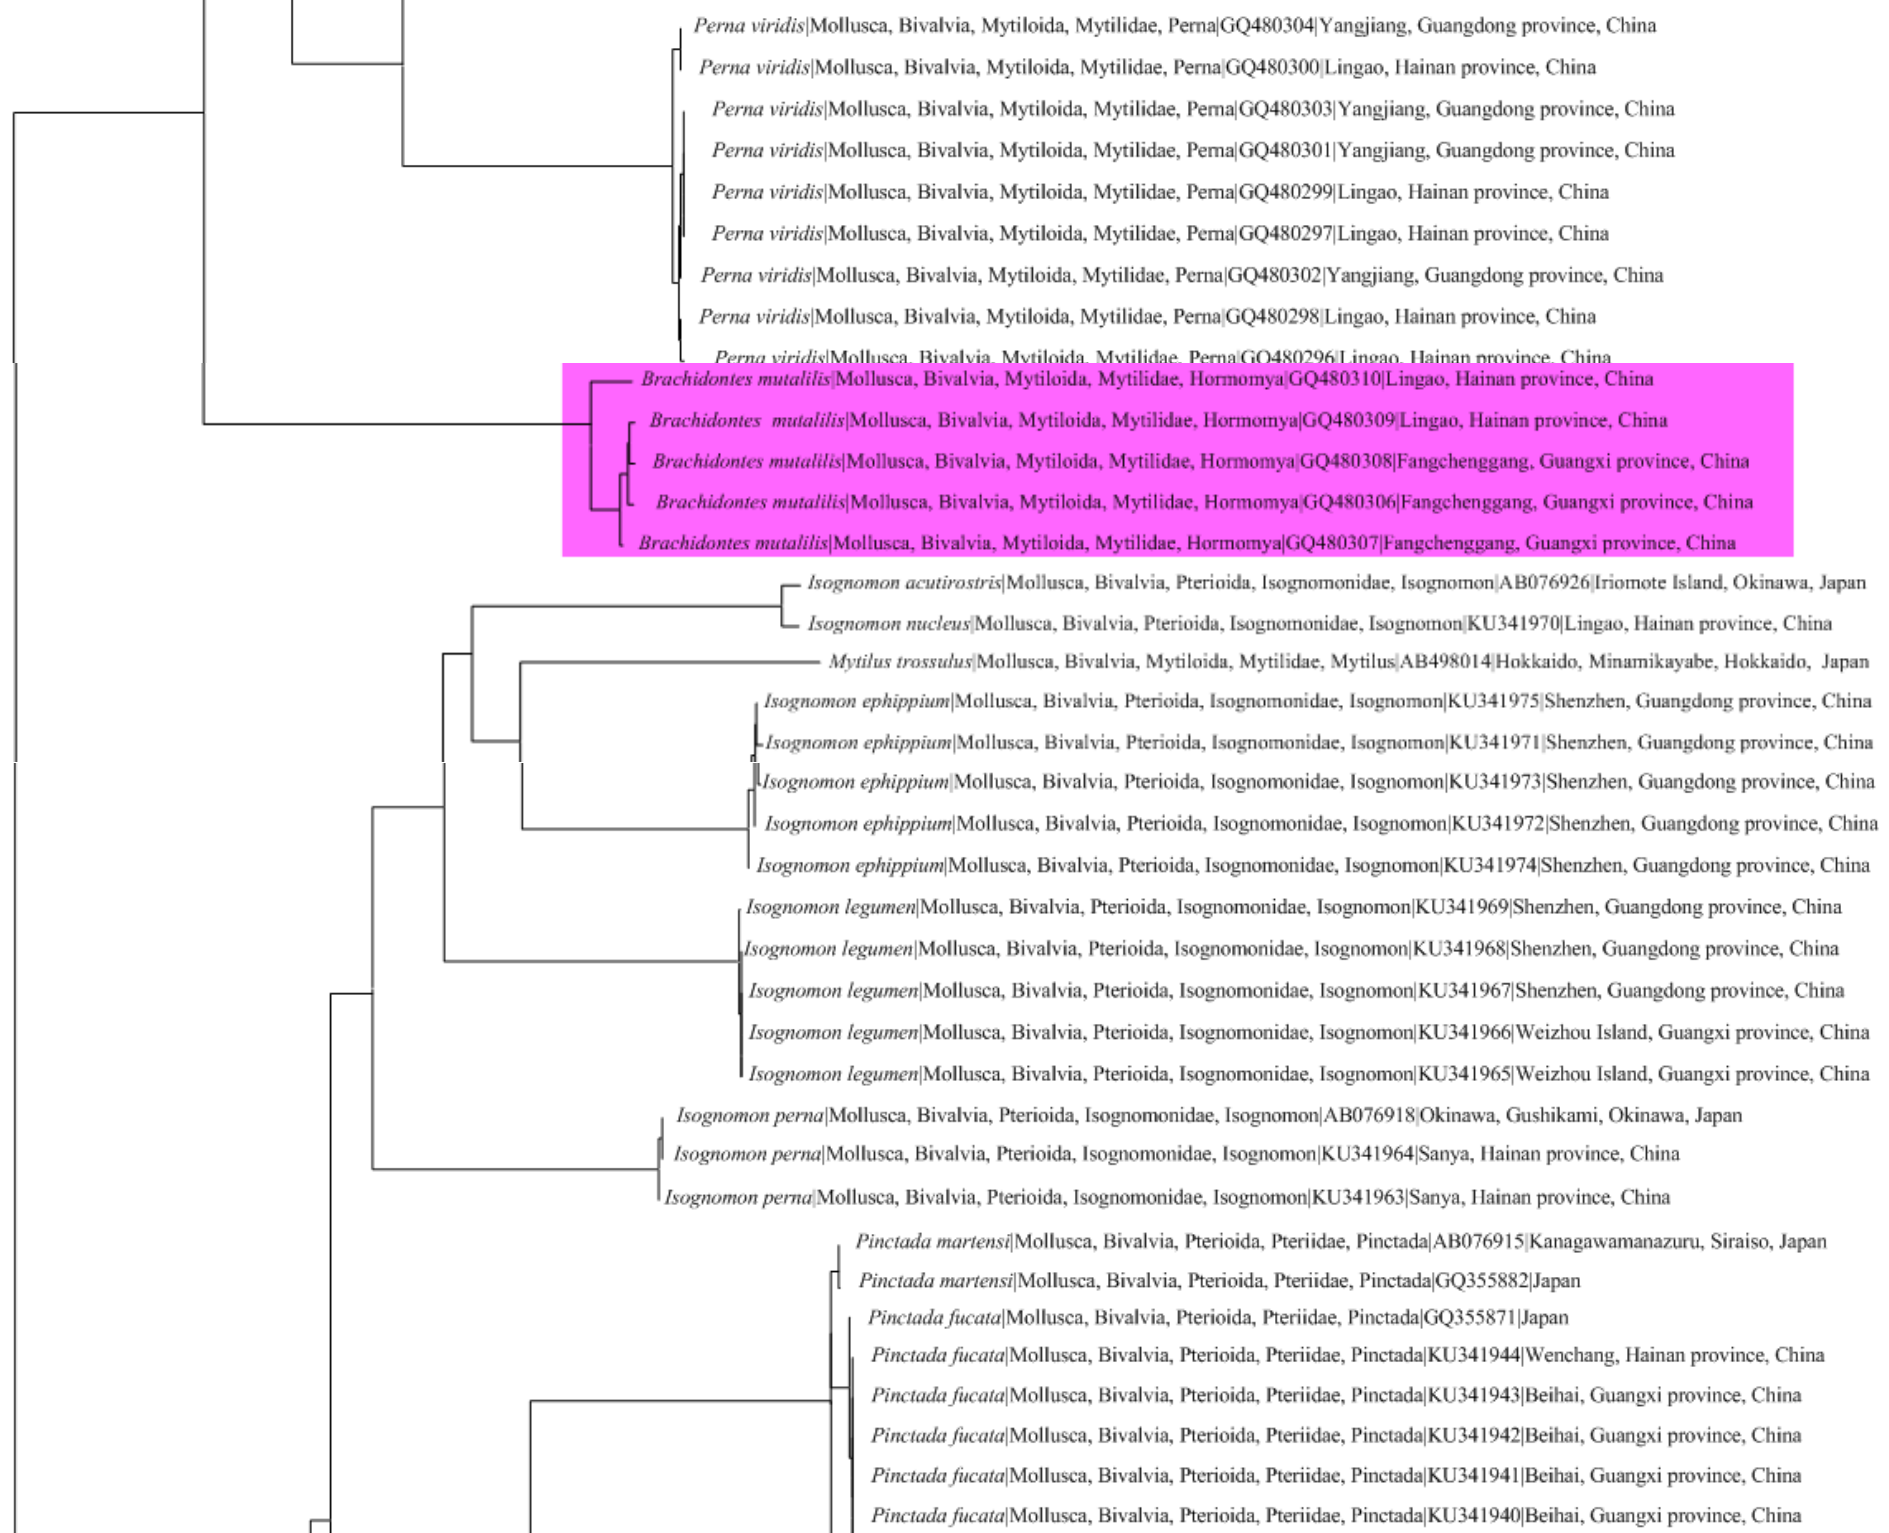

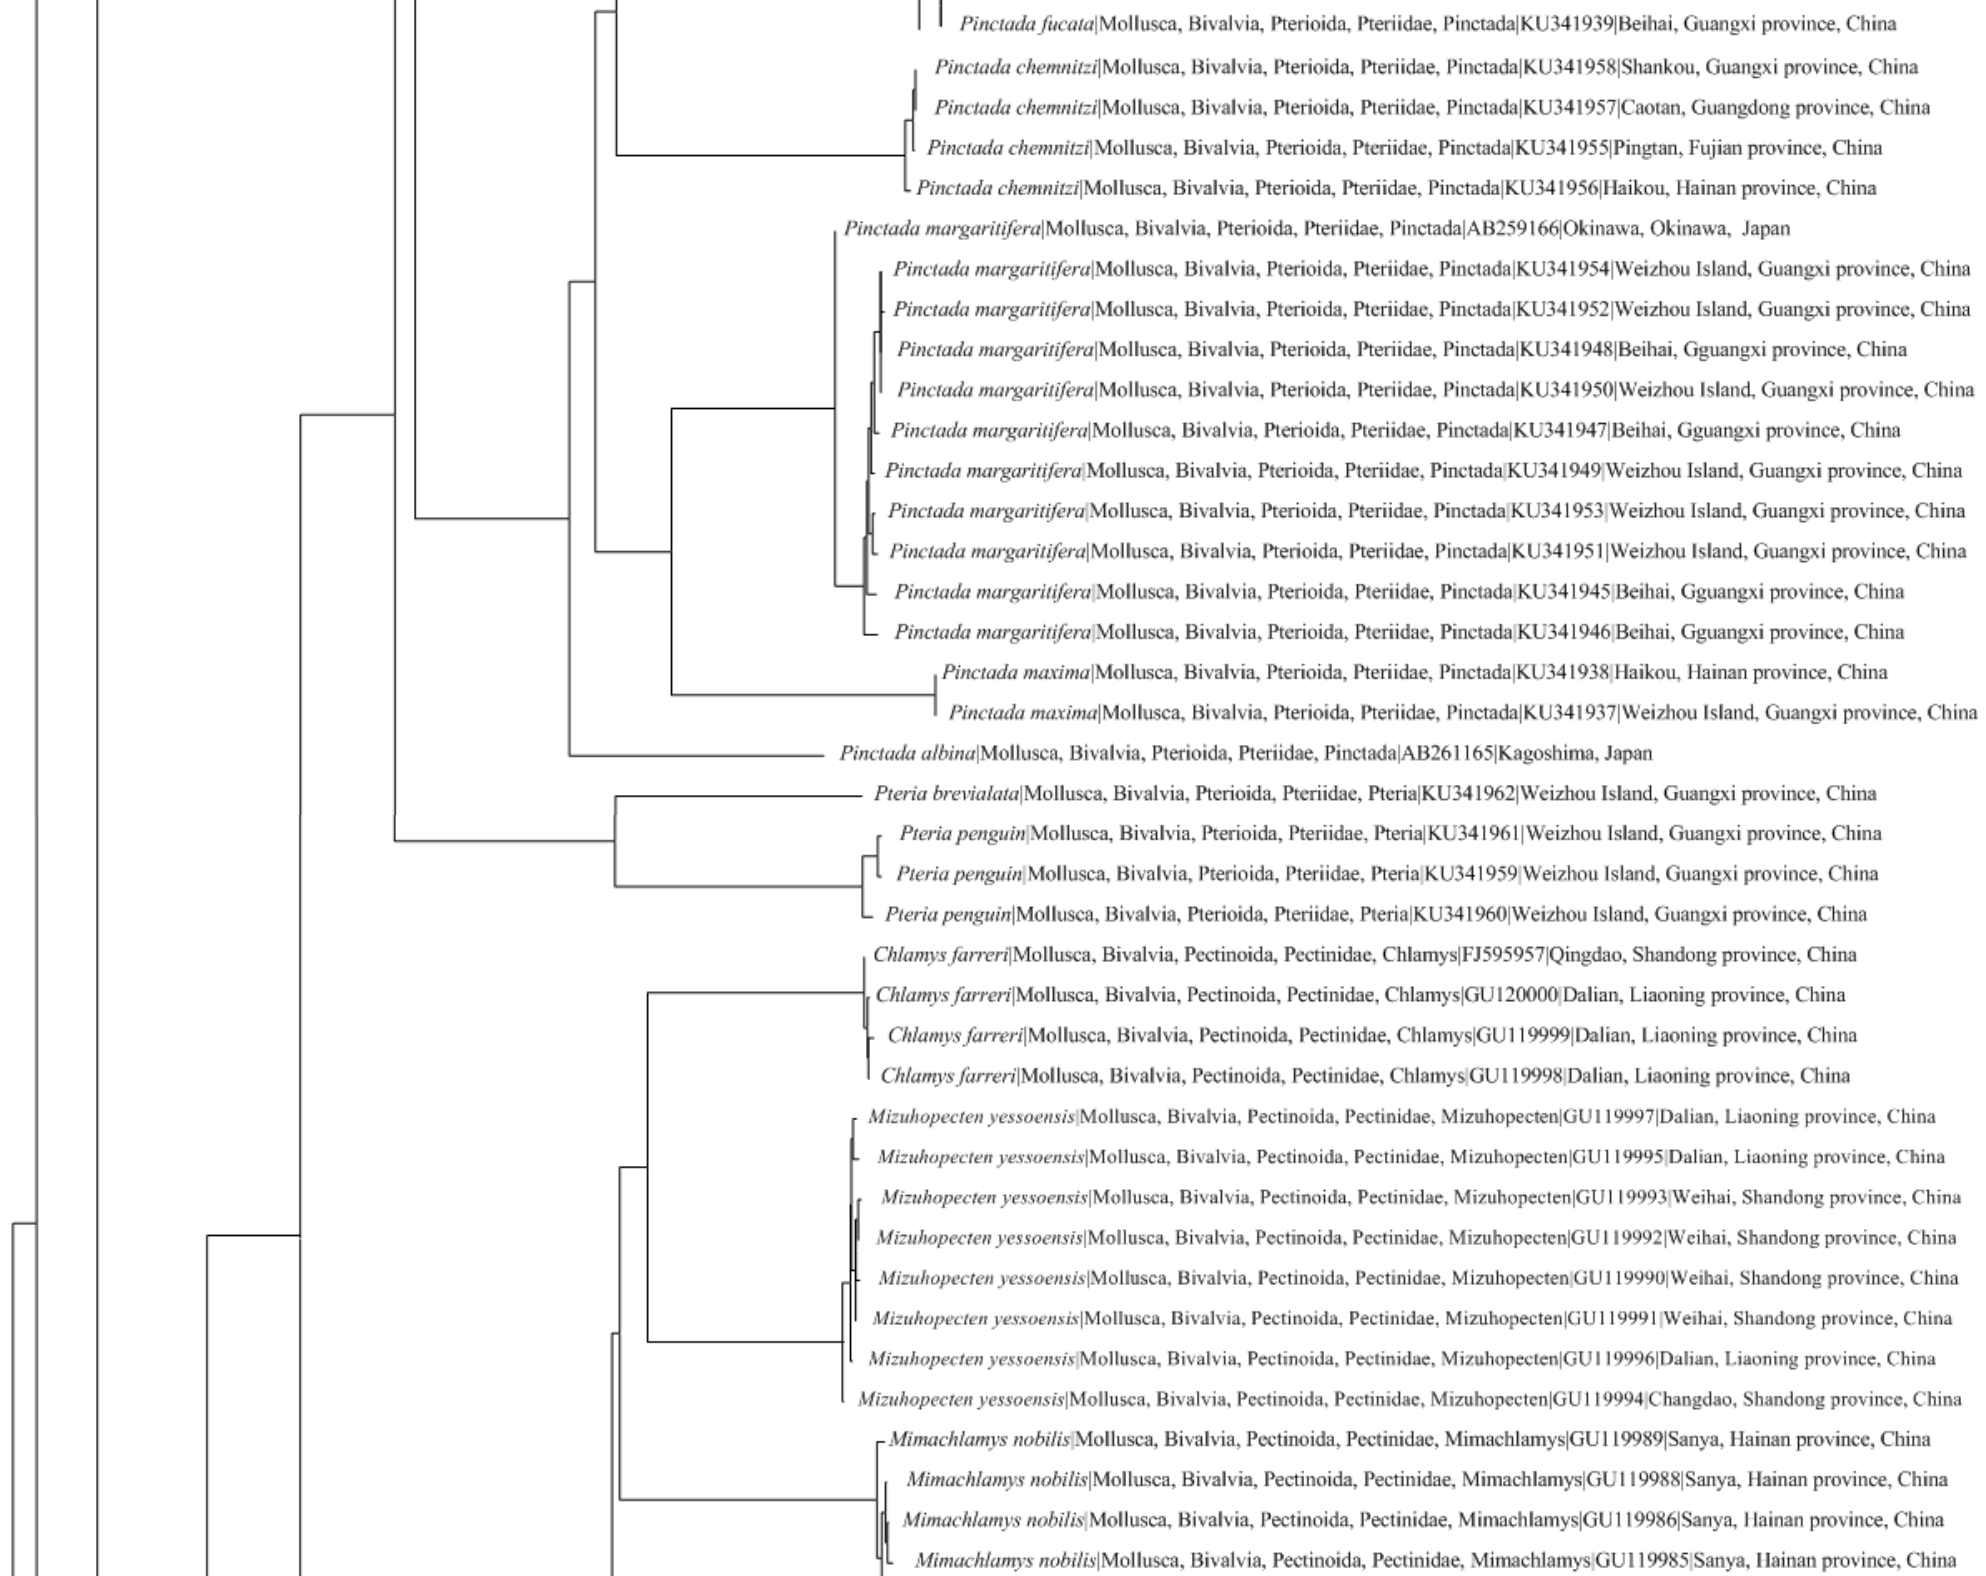



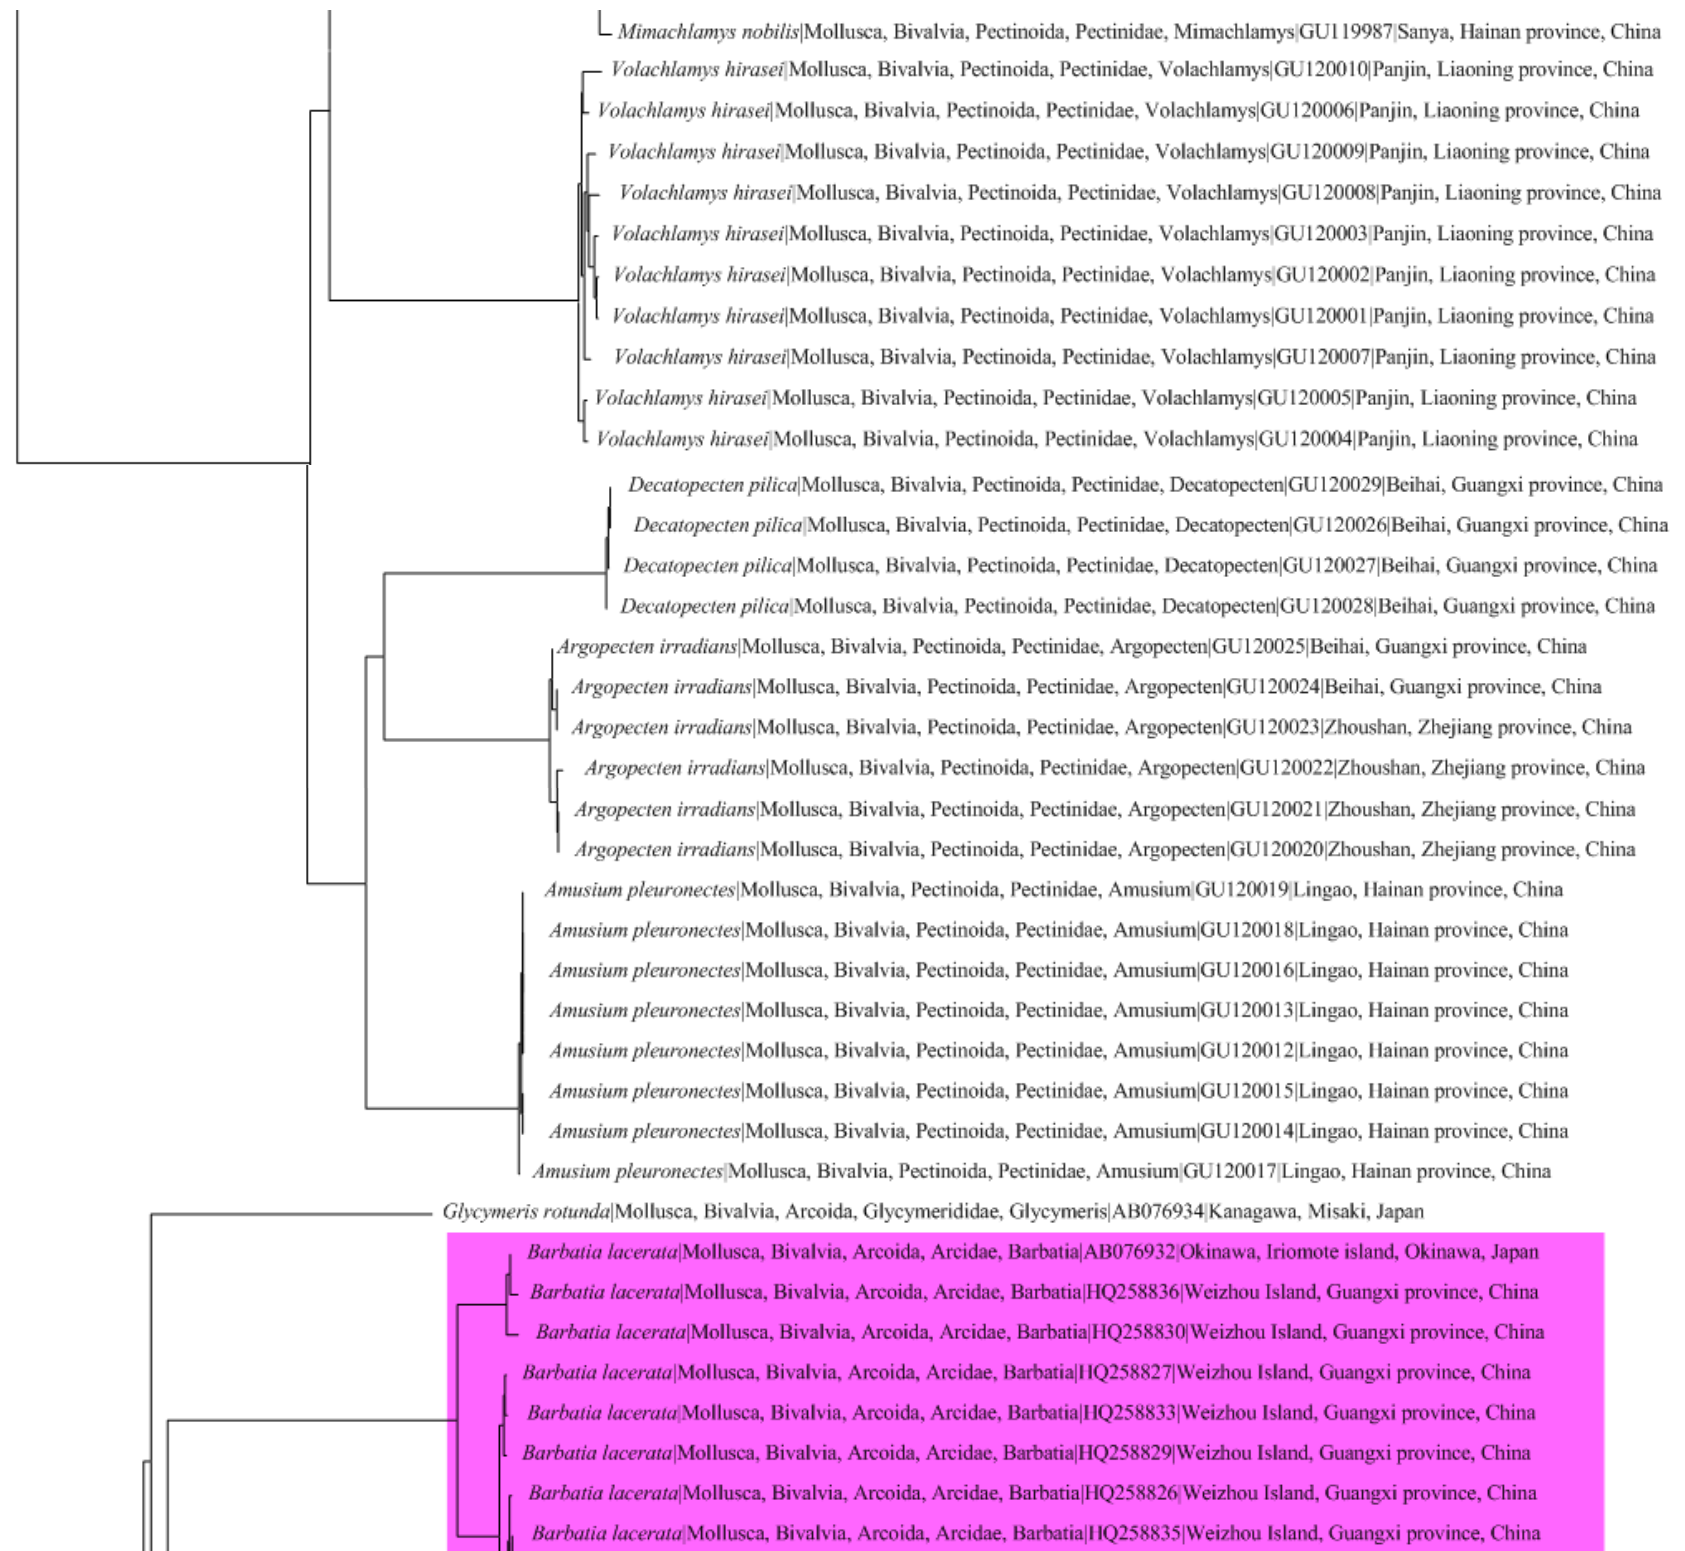

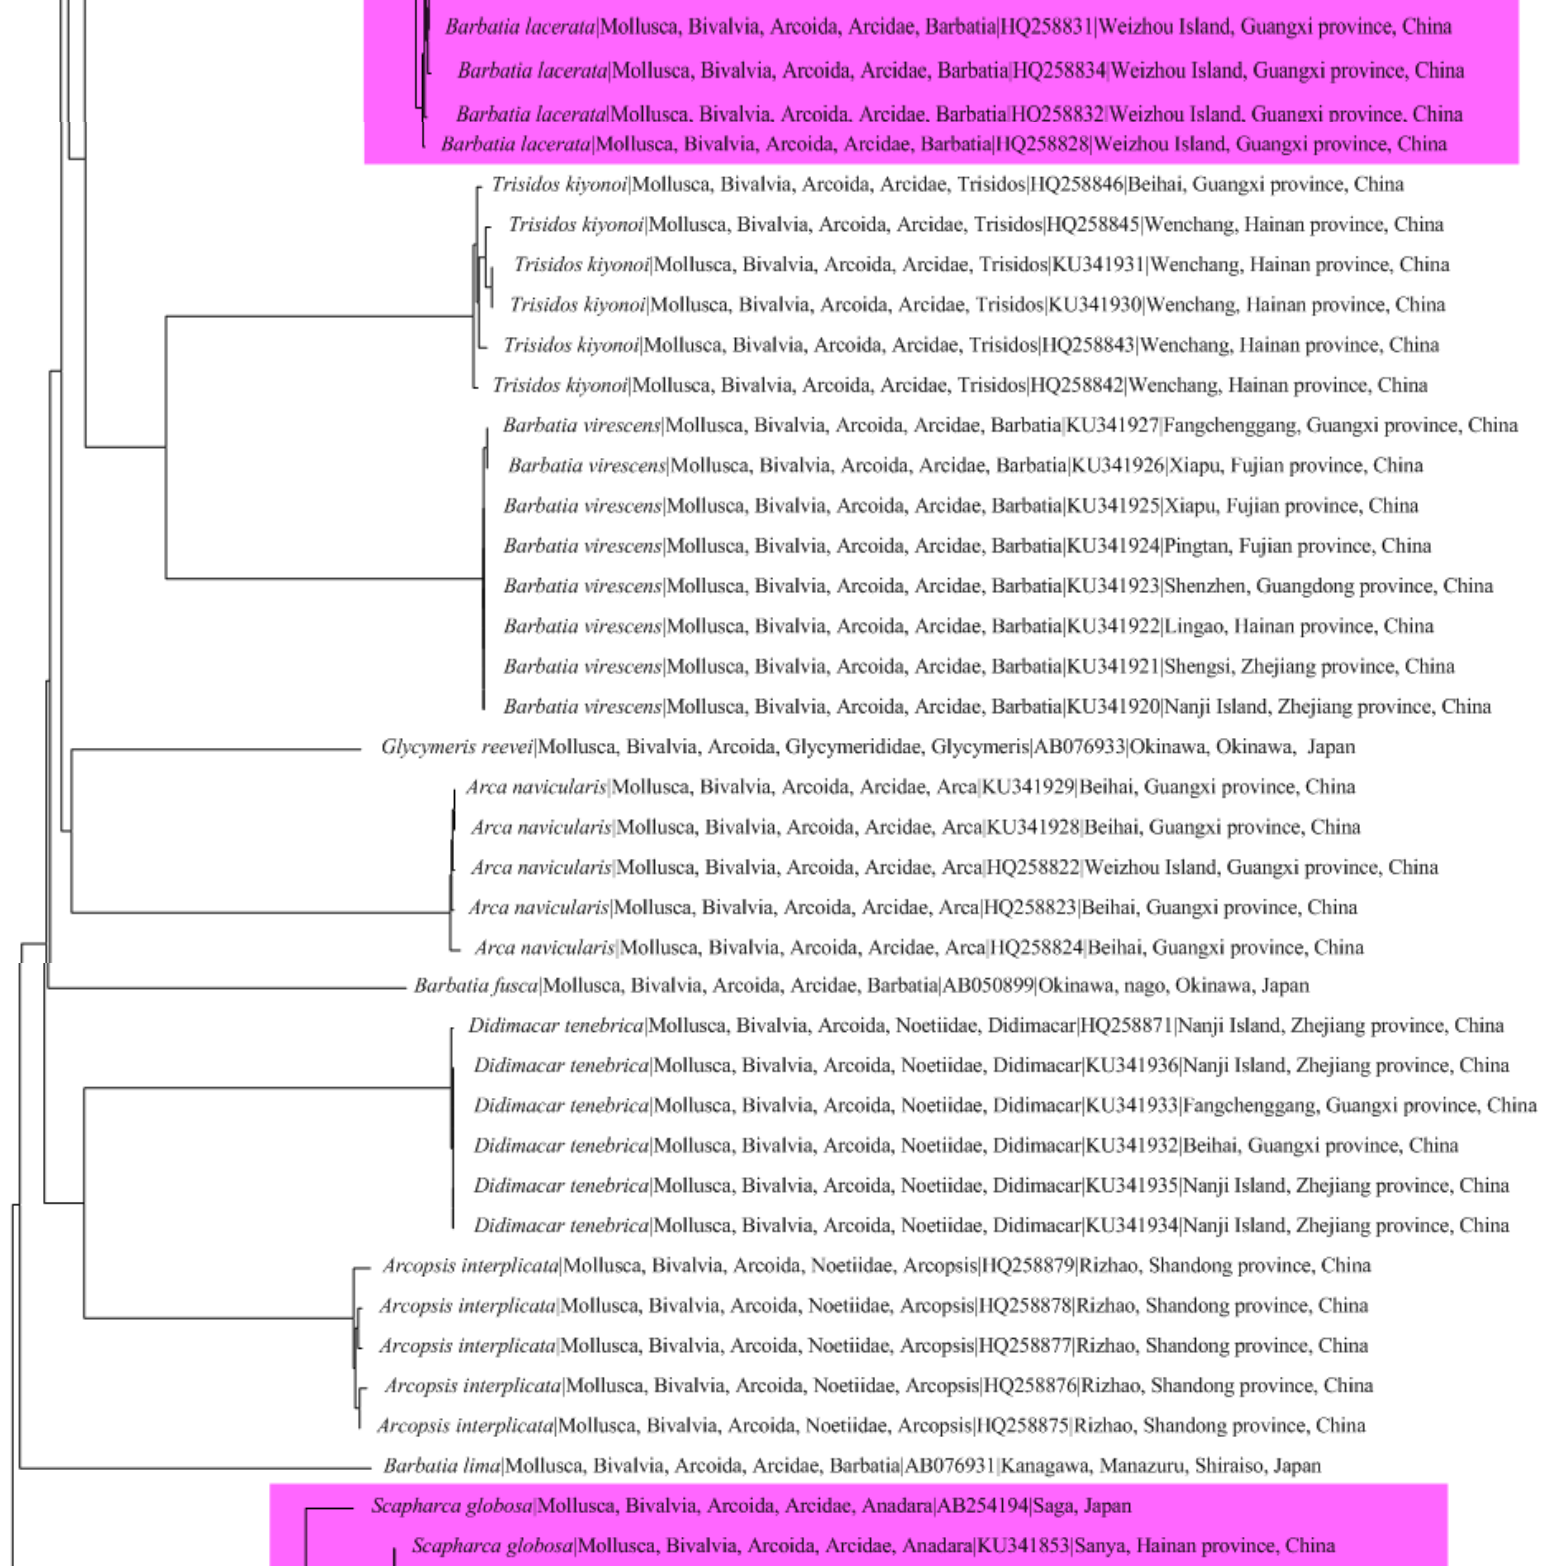

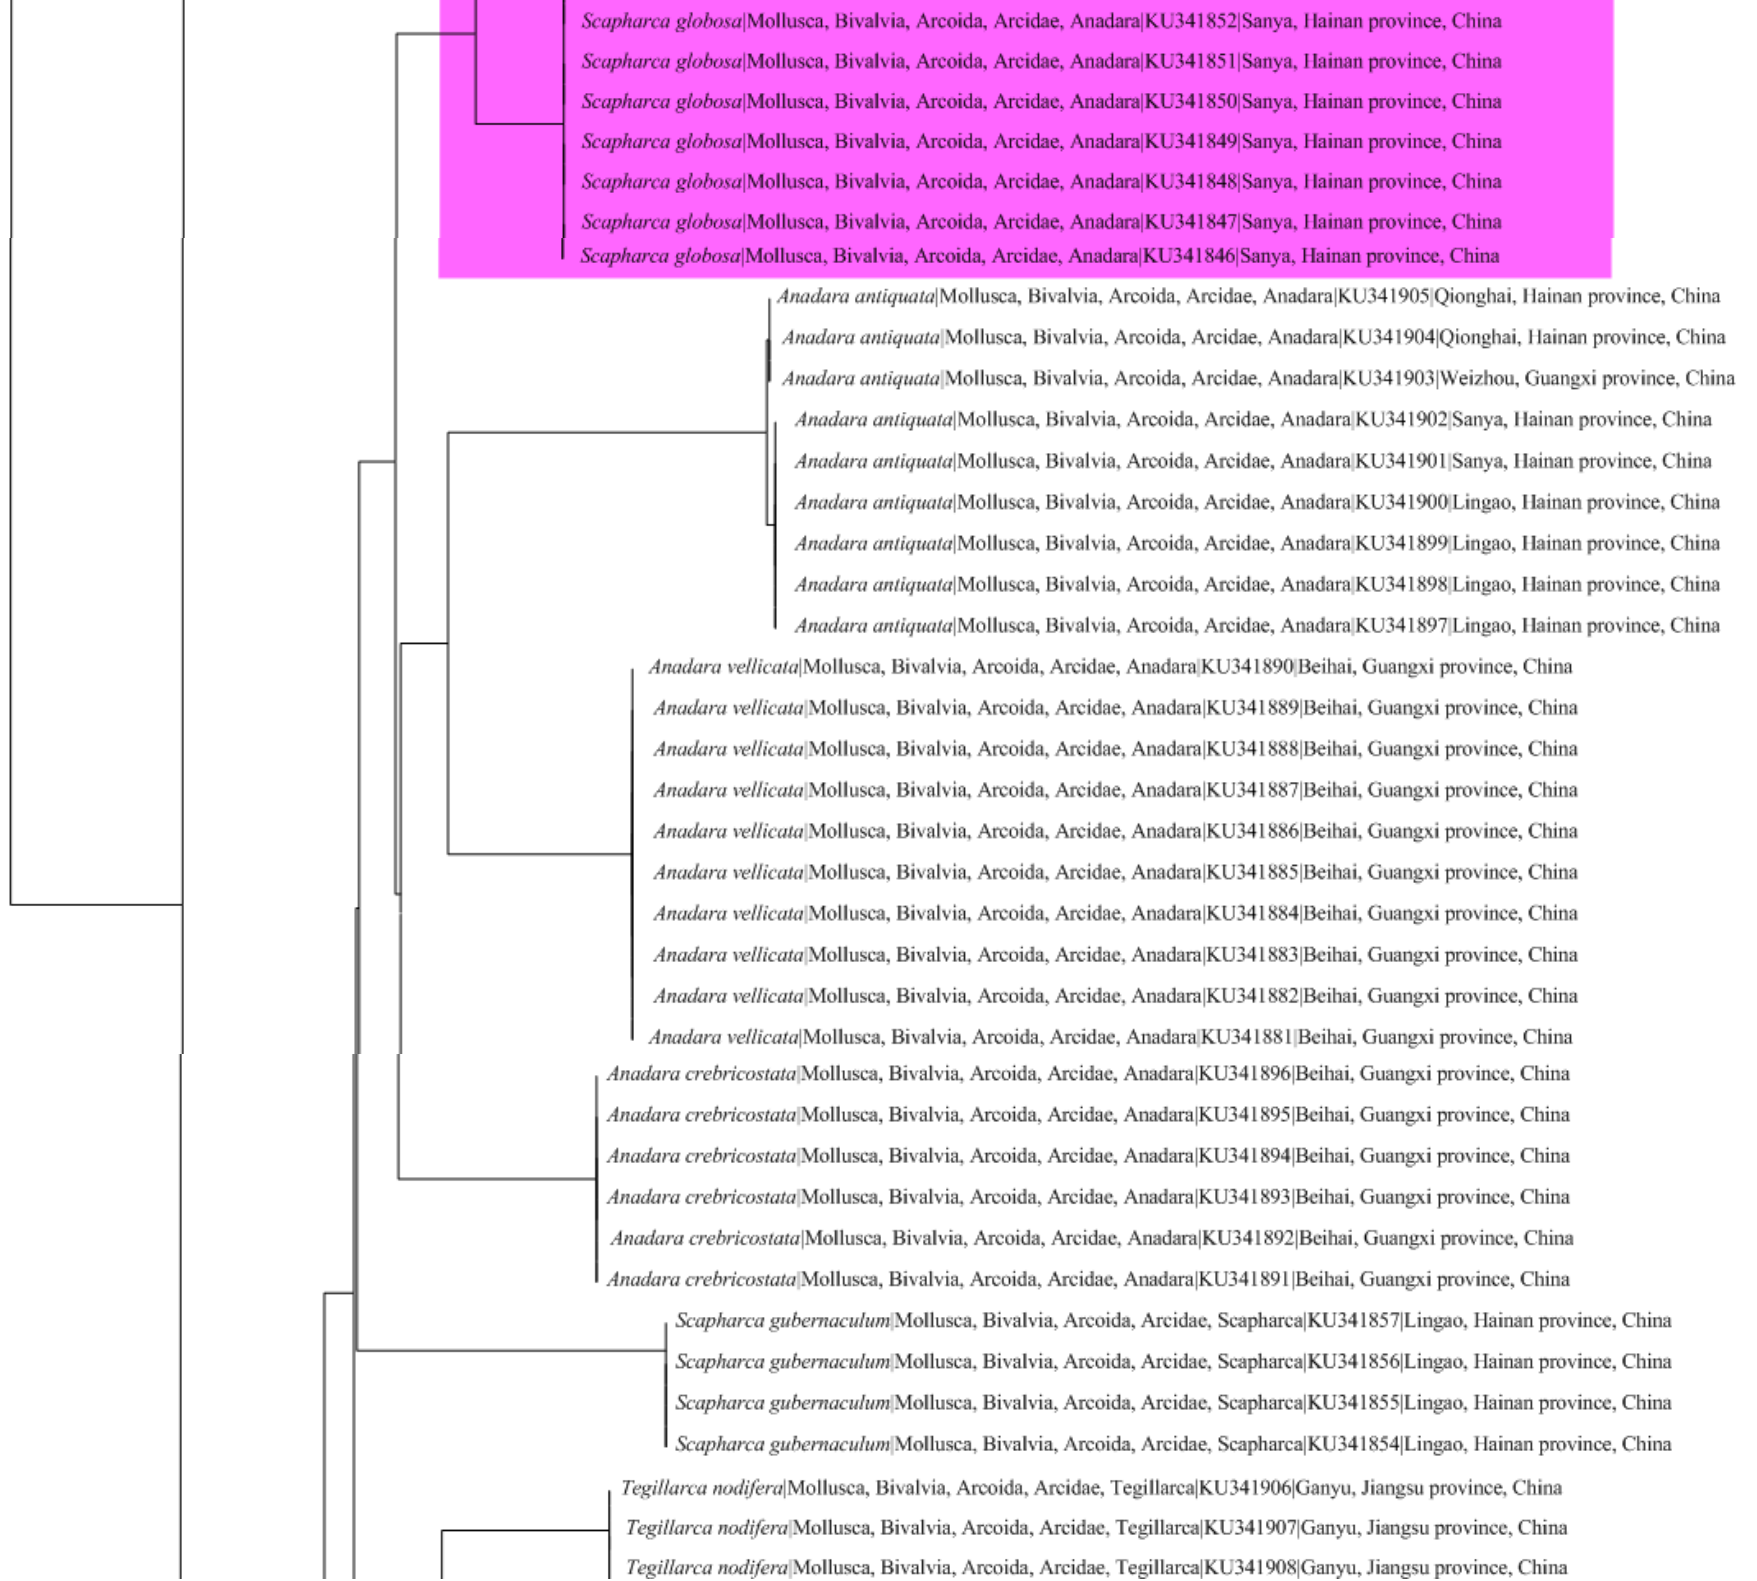

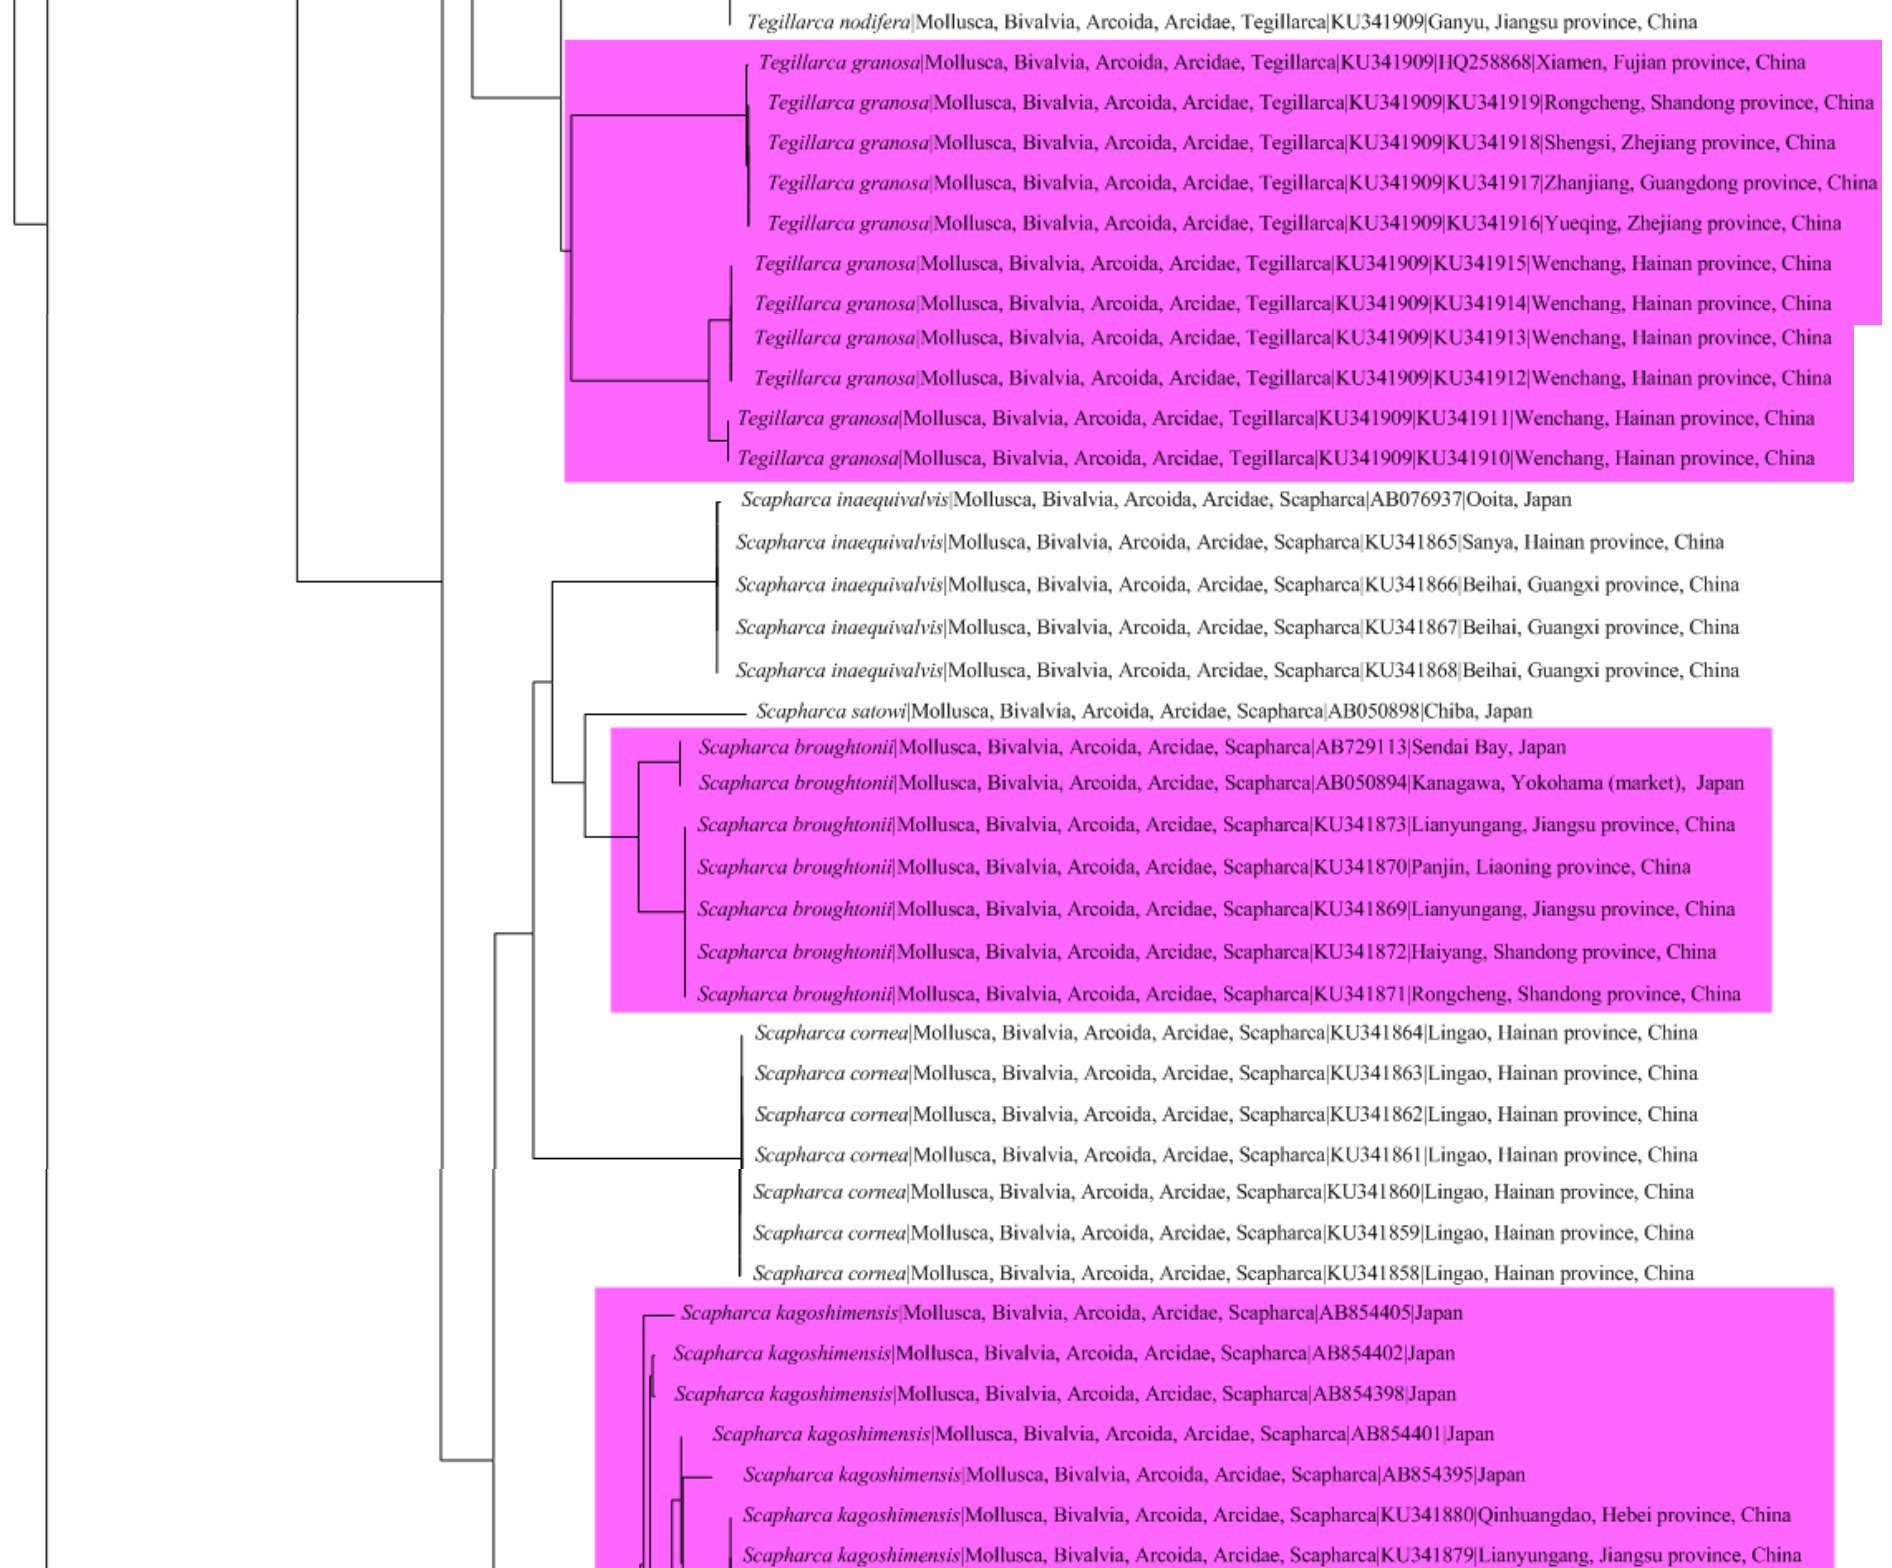

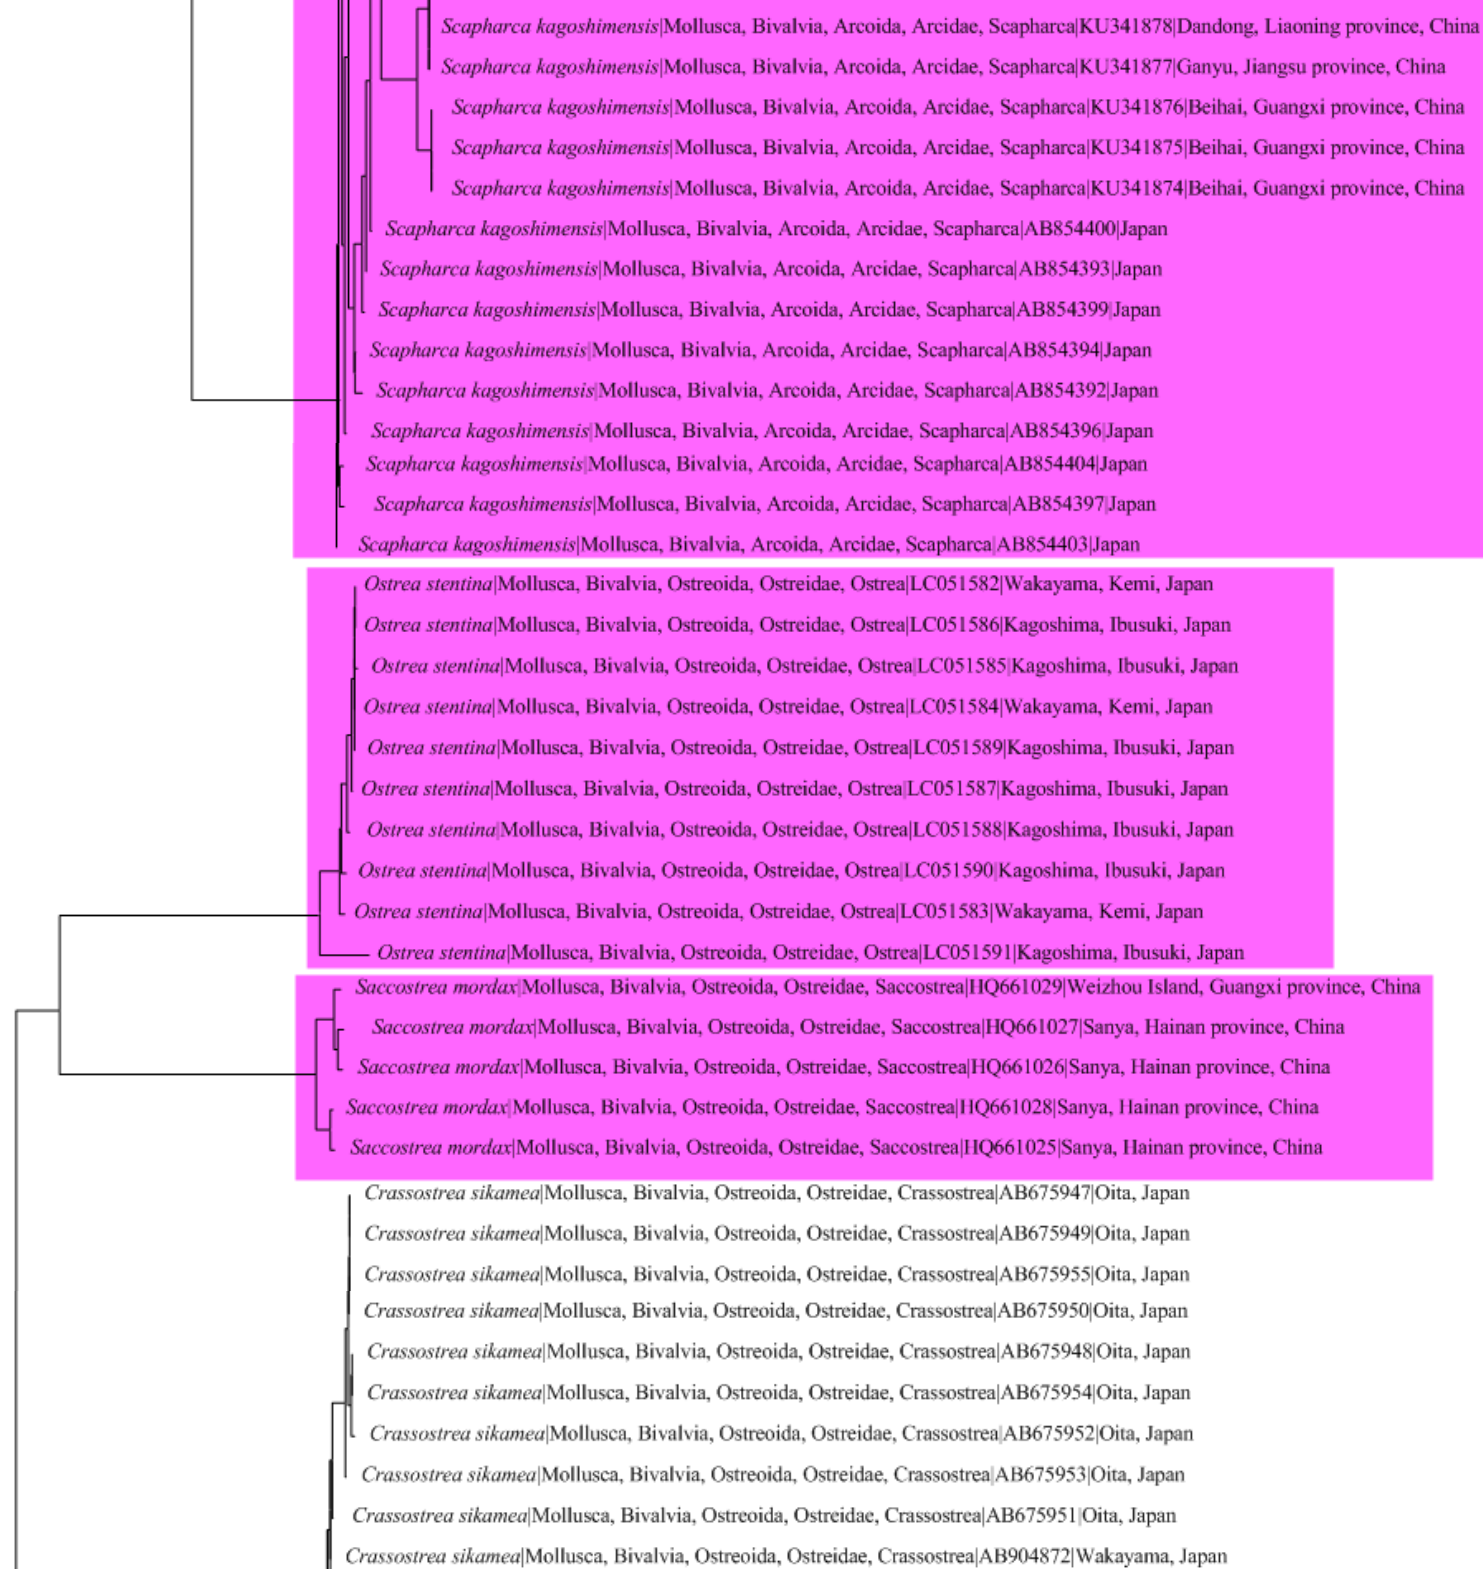

*Crassostrea sikamea*[Mollusca, Bivalvia, Ostreoida, Ostreidae, Crassostrea|AB904875|Wakayama, Japan  
*Crassostrea sikamea*[Mollusca, Bivalvia, Ostreoida, Ostreidae, Crassostrea|AB904874|Wakayama, Japan  
*Crassostrea sikamea*[Mollusca, Bivalvia, Ostreoida, Ostreidae, Crassostrea|AB904877|Wakayama, Japan  
*Crassostrea sikamea*[Mollusca, Bivalvia, Ostreoida, Ostreidae, Crassostrea|AB904878|Wakayama, Japan  
*Crassostrea sikamea*[Mollusca, Bivalvia, Ostreoida, Ostreidae, Crassostrea|HQ661018|Nantong, Jiangsu province, China  
*Crassostrea sikamea*[Mollusca, Bivalvia, Ostreoida, Ostreidae, Crassostrea|HQ661015|Beihai, Guangxi province, China  
*Crassostrea sikamea*[Mollusca, Bivalvia, Ostreoida, Ostreidae, Crassostrea|HQ661019|Nantong, Jiangsu province, China  
*Crassostrea sikamea*[Mollusca, Bivalvia, Ostreoida, Ostreidae, Crassostrea|HQ661012|Fuqing, Fujian province, China  
*Crassostrea sikamea*[Mollusca, Bivalvia, Ostreoida, Ostreidae, Crassostrea|HQ661013|Beihai, Guangxi province, China  
*Crassostrea sikamea*[Mollusca, Bivalvia, Ostreoida, Ostreidae, Crassostrea|HQ661011|Fuqing, Fujian province, China  
*Crassostrea sikamea*[Mollusca, Bivalvia, Ostreoida, Ostreidae, Crassostrea|AB904876|Wakayama, Japan  
*Crassostrea sikamea*[Mollusca, Bivalvia, Ostreoida, Ostreidae, Crassostrea|AB904873|Wakayama, Japan  
*Crassostrea sikamea*[Mollusca, Bivalvia, Ostreoida, Ostreidae, Crassostrea|HQ661017|Wenchang, Hainan province, China  
*Crassostrea sikamea*[Mollusca, Bivalvia, Ostreoida, Ostreidae, Crassostrea|HQ661014|Beihai, Guangxi province, China  
*Crassostrea sikamea*[Mollusca, Bivalvia, Ostreoida, Ostreidae, Crassostrea|HQ661010|Shengsi, Zhejiang province, China  
*Crassostrea sikamea*[Mollusca, Bivalvia, Ostreoida, Ostreidae, Crassostrea|HQ661016|Beihai, Guangxi province, China  
*Crassostrea angulata*[Mollusca, Bivalvia, Ostreoida, Ostreidae, Crassostrea|AB904890|Kagoshima, Japan  
*Crassostrea angulata*[Mollusca, Bivalvia, Ostreoida, Ostreidae, Crassostrea|AB904886|Kagoshima, Japan  
*Crassostrea angulata*[Mollusca, Bivalvia, Ostreoida, Ostreidae, Crassostrea|AB904885|Kagoshima, Japan  
*Crassostrea angulata*[Mollusca, Bivalvia, Ostreoida, Ostreidae, Crassostrea|AB904879|Kagoshima, Japan  
*Crassostrea angulata*[Mollusca, Bivalvia, Ostreoida, Ostreidae, Crassostrea|AB904880|Kagoshima, Japan  
*Crassostrea angulata*[Mollusca, Bivalvia, Ostreoida, Ostreidae, Crassostrea|AB904887|Kagoshima, Japan  
*Crassostrea angulata*[Mollusca, Bivalvia, Ostreoida, Ostreidae, Crassostrea|AB904882|Kagoshima, Japan  
*Crassostrea angulata*[Mollusca, Bivalvia, Ostreoida, Ostreidae, Crassostrea|HQ661009|Pingtan, Fujian province, China  
*Crassostrea angulata*[Mollusca, Bivalvia, Ostreoida, Ostreidae, Crassostrea|HQ661008|Yangjiang, Guangdong province, China  
*Crassostrea angulata*[Mollusca, Bivalvia, Ostreoida, Ostreidae, Crassostrea|EU672832|Taiwan, China  
*Crassostrea angulata*[Mollusca, Bivalvia, Ostreoida, Ostreidae, Crassostrea|AB904888|Kagoshima, Japan  
*Crassostrea angulata*[Mollusca, Bivalvia, Ostreoida, Ostreidae, Crassostrea|AB904883|Kagoshima, Japan  
*Crassostrea angulata*[Mollusca, Bivalvia, Ostreoida, Ostreidae, Crassostrea|AB904881|Kagoshima, Japan  
*Crassostrea gigas*[Mollusca, Bivalvia, Ostreoida, Ostreidae, Crassostrea|KJ855241|Komaru, Japan  
*Crassostrea gigas*[Mollusca, Bivalvia, Ostreoida, Ostreidae, Crassostrea|AB904889|Kagoshima, Japan  
*Crassostrea gigas*[Mollusca, Bivalvia, Ostreoida, Ostreidae, Crassostrea|HQ661007|Lianyungang, Jiangsu province, China  
*Crassostrea gigas*[Mollusca, Bivalvia, Ostreoida, Ostreidae, Crassostrea|HQ661004|Qingdao, Shandong province, China  
*Crassostrea gigas*[Mollusca, Bivalvia, Ostreoida, Ostreidae, Crassostrea|HQ661003|Rongcheng, Shandong province, China  
*Crassostrea gigas*[Mollusca, Bivalvia, Ostreoida, Ostreidae, Crassostrea|HQ661006|Lianyungang, Jiangsu province, China  
*Crassostrea gigas*[Mollusca, Bivalvia, Ostreoida, Ostreidae, Crassostrea|HQ661005|Yantai, Shandong province, China  
*Crassostrea gigas*[Mollusca, Bivalvia, Ostreoida, Ostreidae, Crassostrea|HQ661002|Rongcheng, Shandong province, China  
*Crassostrea gigas*[Mollusca, Bivalvia, Ostreoida, Ostreidae, Crassostrea|AB904884|Kagoshima, Japan  
*Crassostrea gigas*[Mollusca, Bivalvia, Ostreoida, Ostreidae, Crassostrea|AB636166|Japan

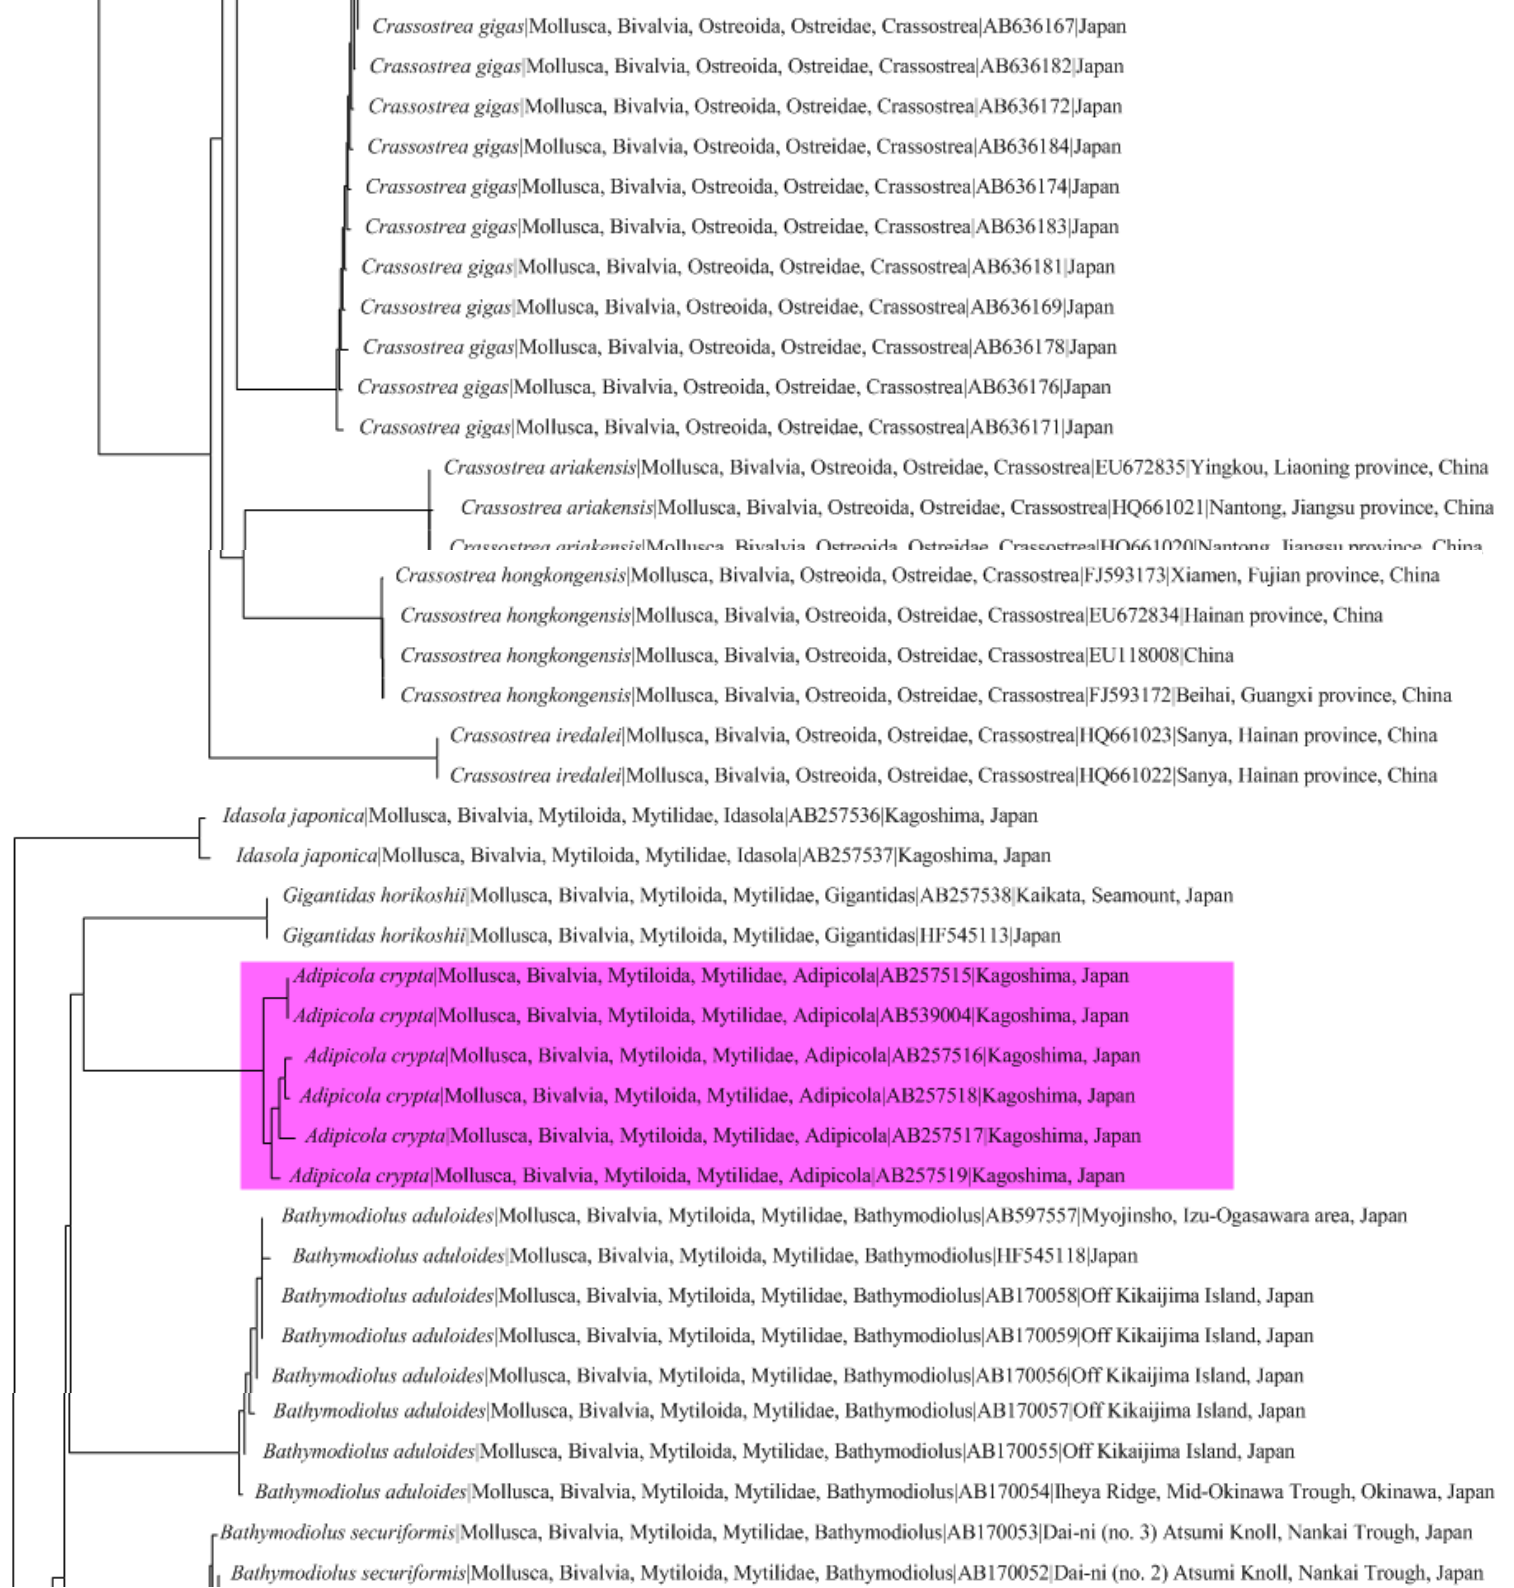

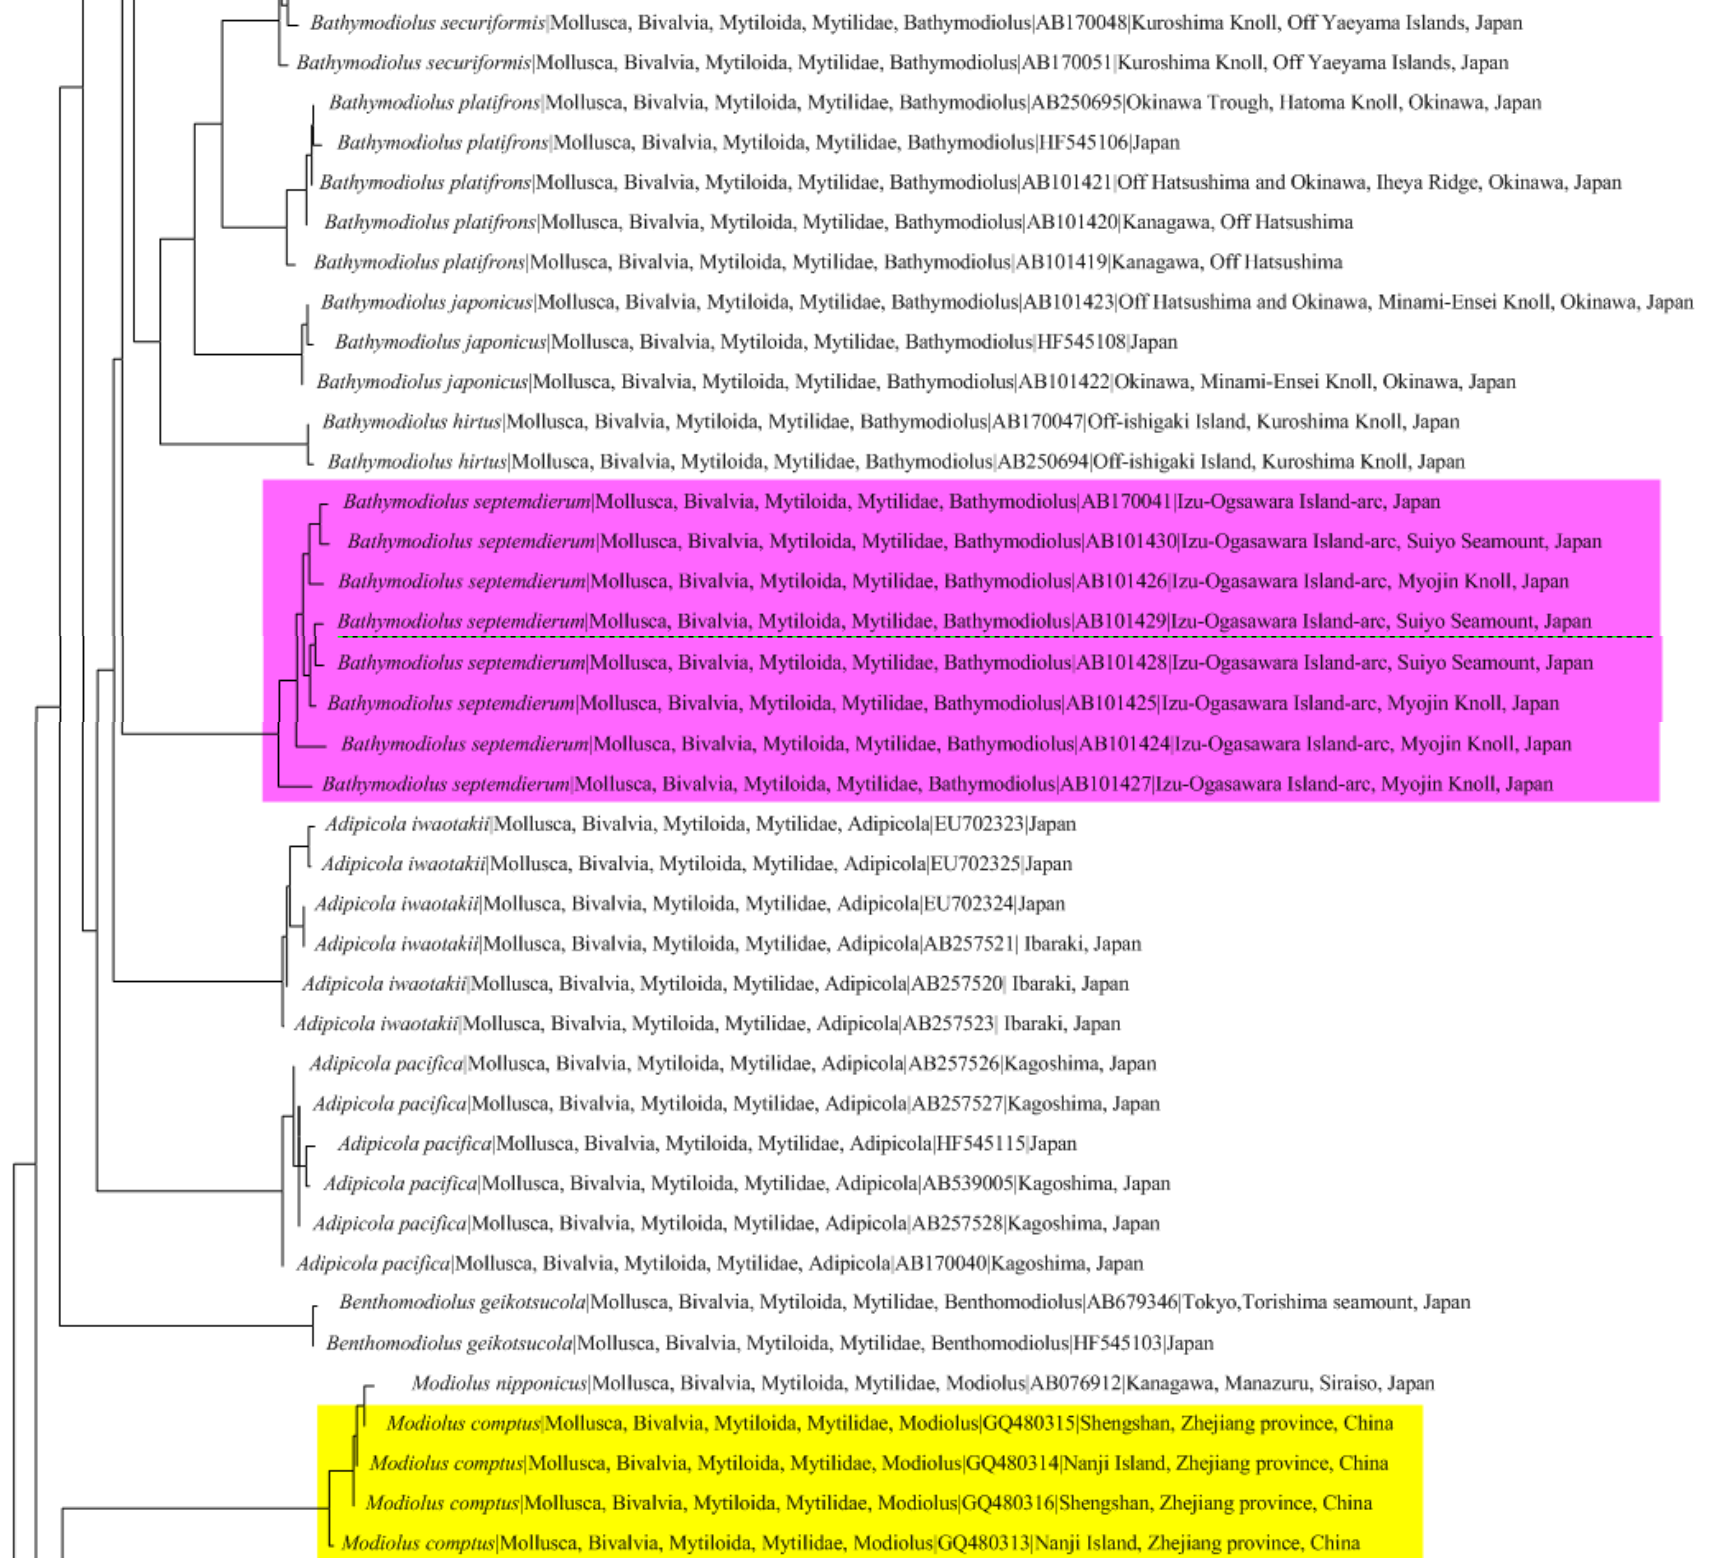



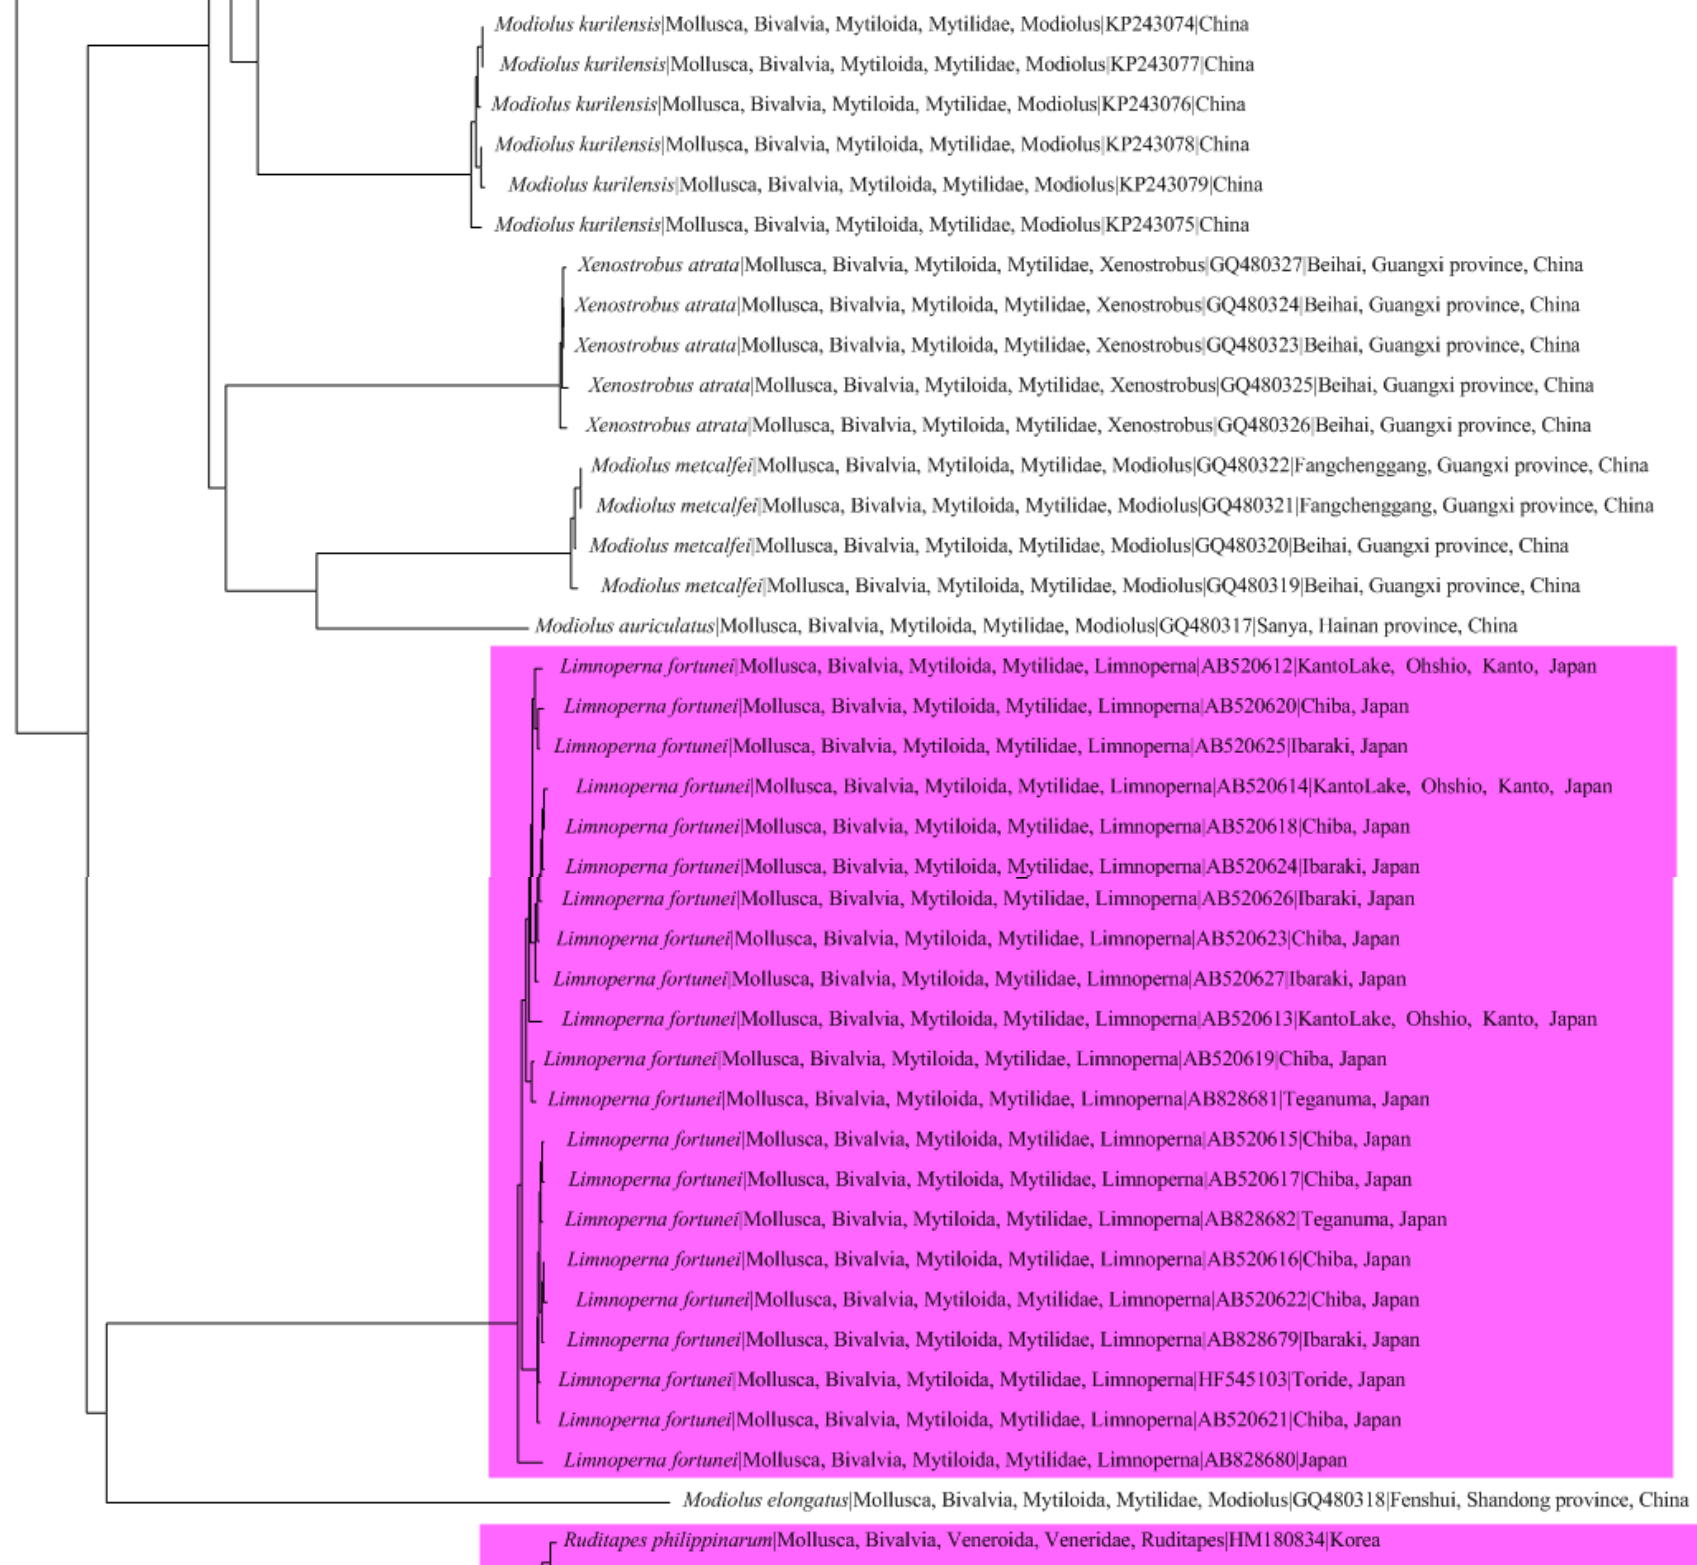

*Ruditapes philippinarum*[Mollusca, Bivalvia, Veneroida, Veneridae, Ruditapes|HM180833|Korea  
*Ruditapes philippinarum*[Mollusca, Bivalvia, Veneroida, Veneridae, Ruditapes|HM124595|China  
*Ruditapes philippinarum*[Mollusca, Bivalvia, Veneroida, Veneridae, Ruditapes|HQ703309|Ganyu, Jiangsu province, China  
*Ruditapes philippinarum*[Mollusca, Bivalvia, Veneroida, Veneridae, Ruditapes|HQ703308|Shenzhen, Guangdong province, China  
*Ruditapes philippinarum*[Mollusca, Bivalvia, Veneroida, Veneridae, Ruditapes|GQ855266|Beihai, Guangxi province, China  
*Ruditapes philippinarum*[Mollusca, Bivalvia, Veneroida, Veneridae, Ruditapes|GQ855265|Nanji Island, Zhejiang province, China  
*Ruditapes philippinarum*[Mollusca, Bivalvia, Veneroida, Veneridae, Ruditapes|HQ703310|Nanji Island, Zhejiang province, China  
*Ruditapes philippinarum*[Mollusca, Bivalvia, Veneroida, Veneridae, Ruditapes|JN898947|China  
*Ruditapes philippinarum*[Mollusca, Bivalvia, Veneroida, Veneridae, Ruditapes|HQ703311|Baimajing, Hainan province, China  
*Ruditapes philippinarum*[Mollusca, Bivalvia, Veneroida, Veneridae, Ruditapes|HQ703306|Zhangpu, Fujian province, China  
*Ruditapes philippinarum*[Mollusca, Bivalvia, Veneroida, Veneridae, Ruditapes|HQ703307|Zhangpu, Fujian province, China  
*Ruditapes philippinarum*[Mollusca, Bivalvia, Veneroida, Veneridae, Ruditapes|GQ855267|Zhangpu, Fujian province, China  
*Ruditapes philippinarum*[Mollusca, Bivalvia, Veneroida, Veneridae, Ruditapes|GQ855263|Qingdao, Shandong province, China  
*Ruditapes philippinarum*[Mollusca, Bivalvia, Veneroida, Veneridae, Ruditapes|HQ703304|Jimo, Shandong province, China  
*Ruditapes philippinarum*[Mollusca, Bivalvia, Veneroida, Veneridae, Ruditapes|AB244401|Hokkaido, Notsuke Bay, Hokkaido, Japan  
*Ruditapes philippinarum*[Mollusca, Bivalvia, Veneroida, Veneridae, Ruditapes|AB244392|Kumamoto, Ariake Sea, Japan  
*Ruditapes philippinarum*[Mollusca, Bivalvia, Veneroida, Veneridae, Ruditapes|AB244400|Hokkaido, Notsuke Bay, Hokkaido, Japan  
*Ruditapes philippinarum*[Mollusca, Bivalvia, Veneroida, Veneridae, Ruditapes|AB244393|Kumamoto, Ariake Sea, Japan  
*Ruditapes philippinarum*[Mollusca, Bivalvia, Veneroida, Veneridae, Ruditapes|AB244399|Hokkaido, Notsuke Bay, Hokkaido, Japan  
*Ruditapes philippinarum*[Mollusca, Bivalvia, Veneroida, Veneridae, Ruditapes|AB244398|Hokkaido, Notsuke Bay, Hokkaido, Japan  
*Ruditapes philippinarum*[Mollusca, Bivalvia, Veneroida, Veneridae, Ruditapes|AB244397|Hokkaido, Notsuke Bay, Hokkaido, Japan  
*Ruditapes philippinarum*[Mollusca, Bivalvia, Veneroida, Veneridae, Ruditapes|AB244396|Kumamoto, Ariake Sea, Japan  
*Ruditapes philippinarum*[Mollusca, Bivalvia, Veneroida, Veneridae, Ruditapes|GQ855264|Rongcheng, Shandong province, China  
*Ruditapes philippinarum*[Mollusca, Bivalvia, Veneroida, Veneridae, Ruditapes|HQ703305|Rongcheng, Shandong province, China  
*Ruditapes philippinarum*[Mollusca, Bivalvia, Veneroida, Veneridae, Ruditapes|AB244394|Kumamoto, Ariake Sea, Japan  
*Ruditapes philippinarum*[Mollusca, Bivalvia, Veneroida, Veneridae, Ruditapes|AB244389|Kyoto, Miyazu Bay, Japan  
*Ruditapes philippinarum*[Mollusca, Bivalvia, Veneroida, Veneridae, Ruditapes|AB244395|Kumamoto, Ariake Sea, Japan  
*Ruditapes philippinarum*[Mollusca, Bivalvia, Veneroida, Veneridae, Ruditapes|AB244390|Kyoto, Miyazu Bay, Japan  
*Ruditapes philippinarum*[Mollusca, Bivalvia, Veneroida, Veneridae, Ruditapes|AB244391|Kyoto, Miyazu Bay, Japan

*Macridiscus semicancellata*[Mollusca, Bivalvia, Veneroida, Veneridae, Macridiscus|HQ224694|China  
*Macridiscus semicancellata*[Mollusca, Bivalvia, Veneroida, Veneridae, Macridiscus|HQ224693|China  
*Macridiscus semicancellata*[Mollusca, Bivalvia, Veneroida, Veneridae, Macridiscus|HQ224692|China  
*Macridiscus semicancellata*[Mollusca, Bivalvia, Veneroida, Veneridae, Macridiscus|HQ224690|China  
*Macridiscus aequilatera*[Mollusca, Bivalvia, Veneroida, Veneridae, Macridiscus|GQ855273|Beihai, Guangxi province, China  
*Macridiscus semicancellata*[Mollusca, Bivalvia, Veneroida, Veneridae, Macridiscus|HQ703276|Beihai, Guangxi province, China  
*Macridiscus aequilatera*[Mollusca, Bivalvia, Veneroida, Veneridae, Macridiscus|GQ855276|Zhoushan, Zhejiang province, China  
*Macridiscus aequilatera*[Mollusca, Bivalvia, Veneroida, Veneridae, Macridiscus|GQ855272|Yangjiang, Guangdong province, China  
*Macridiscus semicancellata*[Mollusca, Bivalvia, Veneroida, Veneridae, Macridiscus|HQ703275|Yangjiang, Guangdong province, China  
*Macridiscus semicancellata*[Mollusca, Bivalvia, Veneroida, Veneridae, Macridiscus|HQ703278|Beihai, Guangxi province, China  
*Macridiscus semicancellata*[Mollusca, Bivalvia, Veneroida, Veneridae, Macridiscus|HQ224688|China

*Macridiscus semicancellata*[Mollusca, Bivalvia, Veneroidea, Veneridae, Macridiscus|HQ224689|China  
*Macridiscus semicancellata*[Mollusca, Bivalvia, Veneroidea, Veneridae, Macridiscus|HQ224687|China  
*Macridiscus semicancellata*[Mollusca, Bivalvia, Veneroidea, Veneridae, Macridiscus|HQ703281|Pingtan, Fujian province, China  
*Macridiscus semicancellata*[Mollusca, Bivalvia, Veneroidea, Veneridae, Macridiscus|HQ224686|China  
*Macridiscus aequilatera*[Mollusca, Bivalvia, Veneroidea, Veneridae, Macridiscus|GQ855275|Beihai, Guangxi province, China  
*Macridiscus semicancellata*[Mollusca, Bivalvia, Veneroidea, Veneridae, Macridiscus|HQ703279|Beihai, Guangxi province, China  
*Macridiscus semicancellata*[Mollusca, Bivalvia, Veneroidea, Veneridae, Macridiscus|HO703280|Beihai, Guangxi province, China  
*Macridiscus aequilatera*[Mollusca, Bivalvia, Veneroidea, Veneridae, Macridiscus|GQ855274|Beihai, Guangxi province, China  
*Macridiscus semicancellata*[Mollusca, Bivalvia, Veneroidea, Veneridae, Macridiscus|HQ703277|Beihai, Guangxi province, China  
*Macridiscus multifarius*[Mollusca, Bivalvia, Veneroidea, Veneridae, Macridiscus|HQ224679|China  
*Macridiscus multifarius*[Mollusca, Bivalvia, Veneroidea, Veneridae, Macridiscus|HQ224678|China  
*Macridiscus multifarius*[Mollusca, Bivalvia, Veneroidea, Veneridae, Macridiscus|HQ224674|China  
*Macridiscus aequilatera*[Mollusca, Bivalvia, Veneroidea, Veneridae, Macridiscus|HQ703267|Haiyang, Shandong province, China  
*Macridiscus aequilatera*[Mollusca, Bivalvia, Veneroidea, Veneridae, Macridiscus|HQ703272|Haiyang, Shandong province, China  
*Macridiscus aequilatera*[Mollusca, Bivalvia, Veneroidea, Veneridae, Macridiscus|HQ703271|Haiyang, Shandong province, China  
*Macridiscus aequilatera*[Mollusca, Bivalvia, Veneroidea, Veneridae, Macridiscus|HQ703269|Haiyang, Shandong province, China  
*Macridiscus aequilatera*[Mollusca, Bivalvia, Veneroidea, Veneridae, Macridiscus|HQ703266|Haiyang, Shandong province, China  
*Macridiscus aequilatera*[Mollusca, Bivalvia, Veneroidea, Veneridae, Macridiscus|HQ703270|Haiyang, Shandong province, China  
*Macridiscus aequilatera*[Mollusca, Bivalvia, Veneroidea, Veneridae, Macridiscus|HQ703268|Haiyang, Shandong province, China  
*Macridiscus multifarius*[Mollusca, Bivalvia, Veneroidea, Veneridae, Macridiscus|HQ224673|China  
*Macridiscus multifarius*[Mollusca, Bivalvia, Veneroidea, Veneridae, Macridiscus|HQ224672|China  
*Macridiscus multifarius*[Mollusca, Bivalvia, Veneroidea, Veneridae, Macridiscus|HQ224676|China  
*Macridiscus multifarius*[Mollusca, Bivalvia, Veneroidea, Veneridae, Macridiscus|HQ224677|China  
*Macridiscus multifarius*[Mollusca, Bivalvia, Veneroidea, Veneridae, Macridiscus|HQ224675|China  
*Macridiscus melanaegis*[Mollusca, Bivalvia, Veneroidea, Veneridae, Macridiscus|HQ703274|Weihai, Shandong province, China  
*Macridiscus melanaegis*[Mollusca, Bivalvia, Veneroidea, Veneridae, Macridiscus|HQ703273|Weihai, Shandong province, China  
*Anomalocardia producta*[Mollusca, Bivalvia, Veneroidea, Veneridae, Cryptonema|HQ703056|Beihai, Guangxi province, China  
*Anomalocardia producta*[Mollusca, Bivalvia, Veneroidea, Veneridae, Cryptonema|HQ703055|Sanya, Hainan province, China  
*Anomalocardia producta*[Mollusca, Bivalvia, Veneroidea, Veneridae, Cryptonema|HQ703054|Beihai, Guangxi province, China  
*Anomalocardia producta*[Mollusca, Bivalvia, Veneroidea, Veneridae, Cryptonema|HQ703052|Wenchang, Hainan province, China  
*Anomalocardia producta*[Mollusca, Bivalvia, Veneroidea, Veneridae, Cryptonema|HQ703053|Wenchang, Hainan province, China  
*Venerupis bruguieri*[Mollusca, Bivalvia, Veneroidea, Veneridae, Venerupis|DQ184829|Tanoura, Nagashima, Yamaguchi Prefecture, Japan  
*Ruditapes variegata*[Mollusca, Bivalvia, Veneroidea, Veneridae, Ruditapes|GQ855270|Danzhou, Hainan province, China  
*Ruditapes variegata*[Mollusca, Bivalvia, Veneroidea, Veneridae, Ruditapes|GQ855271|Beihai, Guangxi province, China  
*Ruditapes variegata*[Mollusca, Bivalvia, Veneroidea, Veneridae, Ruditapes|GQ855269|Weizhou Island, Guangxi province, China  
*Ruditapes variegata*[Mollusca, Bivalvia, Veneroidea, Veneridae, Ruditapes|HQ703317|Weizhou Island, Guangxi province, China  
*Ruditapes variegata*[Mollusca, Bivalvia, Veneroidea, Veneridae, Ruditapes|HQ703316|Sanya, Hainan province, China  
*Ruditapes variegata*[Mollusca, Bivalvia, Veneroidea, Veneridae, Ruditapes|HQ703312|Beihai, Guangxi province, China  
*Ruditapes variegata*[Mollusca, Bivalvia, Veneroidea, Veneridae, Ruditapes|HQ703315|Sanya, Hainan province, China

*Ruditapes variegata*[Mollusca, Bivalvia, Veneroidea, Veneridae, Ruditapes|HQ703313|Beihai, Guangxi province, China

*Ruditapes variegata*[Mollusca, Bivalvia, Veneroidea, Veneridae, Ruditapes|GQ855268|Beihai, Guangxi province, China

*Ruditapes variegata*[Mollusca, Bivalvia, Veneroidea, Veneridae, Ruditapes|HQ703314|Weizhou Island, Guangxi province, China

*Arca avellana*[Mollusca, Bivalvia, Arcoida, Arcidae, Arca|HM180483|Korea

*Arca avellana*[Mollusca, Bivalvia, Arcoida, Arcidae, Arca|HM180481|Korea

*Arca avellana*[Mollusca, Bivalvia, Arcoida, Arcidae, Arca|HM180482|Korea

*Mercenaria mercenaria*[Mollusca, Bivalvia, Veneroidea, Veneridae, Mercenaria|AB670719|Tokyo Bay, Japan

*Mercenaria mercenaria*[Mollusca, Bivalvia, Veneroidea, Veneridae, Mercenaria|AB670720|Tokyo Bay, Japan

*Mercenaria mercenaria*[Mollusca, Bivalvia, Veneroidea, Veneridae, Mercenaria|AB685196|Tokyo Bay, Japan

*Mercenaria mercenaria*[Mollusca, Bivalvia, Veneroidea, Veneridae, Mercenaria|AB670723|Tokyo Bay, Japan

*Mercenaria mercenaria*[Mollusca, Bivalvia, Veneroidea, Veneridae, Mercenaria|AB670733|Tokyo Bay, Japan

*Mercenaria mercenaria*[Mollusca, Bivalvia, Veneroidea, Veneridae, Mercenaria|AB685203|Tokyo Bay, Japan

*Mercenaria mercenaria*[Mollusca, Bivalvia, Veneroidea, Veneridae, Mercenaria|AB685210|Tokyo Bay, Japan

*Mercenaria mercenaria*[Mollusca, Bivalvia, Veneroidea, Veneridae, Mercenaria|AB685211|Tokyo Bay, Japan

*Mercenaria mercenaria*[Mollusca, Bivalvia, Veneroidea, Veneridae, Mercenaria|AB685206|Tokyo Bay, Japan

*Mercenaria mercenaria*[Mollusca, Bivalvia, Veneroidea, Veneridae, Mercenaria|AB670726|Tokyo Bay, Japan

*Mercenaria mercenaria*[Mollusca, Bivalvia, Veneroidea, Veneridae, Mercenaria|AB685198|Tokyo Bay, Japan

*Mercenaria mercenaria*[Mollusca, Bivalvia, Veneroidea, Veneridae, Mercenaria|AB685200|Tokyo Bay, Japan

*Mercenaria mercenaria*[Mollusca, Bivalvia, Veneroidea, Veneridae, Mercenaria|AB670727|Tokyo Bay, Japan

*Mercenaria mercenaria*[Mollusca, Bivalvia, Veneroidea, Veneridae, Mercenaria|AB670724|Tokyo Bay, Japan

*Mercenaria mercenaria*[Mollusca, Bivalvia, Veneroidea, Veneridae, Mercenaria|AB670732|Tokyo Bay, Japan

*Mercenaria mercenaria*[Mollusca, Bivalvia, Veneroidea, Veneridae, Mercenaria|AB670730|Tokyo Bay, Japan

*Mercenaria mercenaria*[Mollusca, Bivalvia, Veneroidea, Veneridae, Mercenaria|AB670729|Tokyo Bay, Japan

*Mercenaria mercenaria*[Mollusca, Bivalvia, Veneroidea, Veneridae, Mercenaria|AB685212|Tokyo Bay, Japan

*Mercenaria mercenaria*[Mollusca, Bivalvia, Veneroidea, Veneridae, Mercenaria|AB670722|Tokyo Bay, Japan

*Mercenaria mercenaria*[Mollusca, Bivalvia, Veneroidea, Veneridae, Mercenaria|AB685201|Tokyo Bay, Japan

*Mercenaria mercenaria*[Mollusca, Bivalvia, Veneroidea, Veneridae, Mercenaria|AB685194|Tokyo Bay, Japan

*Mercenaria mercenaria*[Mollusca, Bivalvia, Veneroidea, Veneridae, Mercenaria|AB685197|Tokyo Bay, Japan

*Mercenaria mercenaria*[Mollusca, Bivalvia, Veneroidea, Veneridae, Mercenaria|AB685207|Tokyo Bay, Japan

*Mercenaria mercenaria*[Mollusca, Bivalvia, Veneroidea, Veneridae, Mercenaria|AB685209|Tokyo Bay, Japan

*Mercenaria mercenaria*[Mollusca, Bivalvia, Veneroidea, Veneridae, Mercenaria|AB670728|Tokyo Bay, Japan

*Mercenaria mercenaria*[Mollusca, Bivalvia, Veneroidea, Veneridae, Mercenaria|AB685193|Tokyo Bay, Japan

*Mercenaria mercenaria*[Mollusca, Bivalvia, Veneroidea, Veneridae, Mercenaria|AB670734|Tokyo Bay, Japan

*Mercenaria mercenaria*[Mollusca, Bivalvia, Veneroidea, Veneridae, Mercenaria|AB685195|Tokyo Bay, Japan

*Mercenaria mercenaria*[Mollusca, Bivalvia, Veneroidea, Veneridae, Mercenaria|AB685208|Tokyo Bay, Japan

*Mercenaria mercenaria*[Mollusca, Bivalvia, Veneroidea, Veneridae, Mercenaria|AB670721|Tokyo Bay, Japan

*Mercenaria mercenaria*[Mollusca, Bivalvia, Veneroidea, Veneridae, Mercenaria|AB685199|Tokyo Bay, Japan

*Mercenaria mercenaria*[Mollusca, Bivalvia, Veneroidea, Veneridae, Mercenaria|AB685204|Tokyo Bay, Japan

A phylogenetic tree showing the relationships between several species of bivalves. The tree is rooted on the left and branches out to the right. The species names and their associated taxonomic information and collection details are listed to the right of the branches. The tree is divided into several major clades, some of which are highlighted with a pink background. The clades include Mercenaria, Periglypta, Globivenus, and Chemnitzia. The Mercenaria clade is the largest and is highlighted in pink. The Periglypta clade is also highlighted in pink. The Globivenus clade is not highlighted. The Chemnitzia clade is not highlighted.

*Mercenaria mercenaria*|Mollusca, Bivalvia, Veneroida, Veneridae, Mercenaria|AB670731|Tokyo Bay, Japan  
*Mercenaria mercenaria*|Mollusca, Bivalvia, Veneroida, Veneridae, Mercenaria|AB685202|Tokyo Bay, Japan  
*Mercenaria mercenaria*|Mollusca, Bivalvia, Veneroida, Veneridae, Mercenaria|HQ703074|Lianyungang, Jiangsu province, China  
*Mercenaria mercenaria*|Mollusca, Bivalvia, Veneroida, Veneridae, Mercenaria|HQ7030756|Lianyungang, Jiangsu province, China  
*Mercenaria mercenaria*|Mollusca, Bivalvia, Veneroida, Veneridae, Mercenaria|HQ703073|Lianyungang, Jiangsu province, China  
*Mercenaria mercenaria*|Mollusca, Bivalvia, Veneroida, Veneridae, Mercenaria|DQ399403|China  
*Mercenaria mercenaria*|Mollusca, Bivalvia, Veneroida, Veneridae, Mercenaria|JN898950|China  
*Mercenaria mercenaria*|Mollusca, Bivalvia, Veneroida, Veneridae, Mercenaria|HM124619|China  
*Mercenaria mercenaria*|Mollusca, Bivalvia, Veneroida, Veneridae, Mercenaria|HM124618|China  
*Mercenaria mercenaria*|Mollusca, Bivalvia, Veneroida, Veneridae, Mercenaria|HQ703075|Lianyungang, Jiangsu province, China  
*Mercenaria mercenaria*|Mollusca, Bivalvia, Veneroida, Veneridae, Mercenaria|HQ703072|Lianyungang, Jiangsu province, China  
*Mercenaria mercenaria*|Mollusca, Bivalvia, Veneroida, Veneridae, Mercenaria|HQ703071|Lianyungang, Jiangsu province, China  
*Periglypta compressa*|Mollusca, Bivalvia, Veneroida, Veneridae, Periglypta|HM124606|China  
*Periglypta puerpera*|Mollusca, Bivalvia, Veneroida, Veneridae, Periglypta|HQ703322|Lingshui, Hainan province, China  
*Periglypta puerpera*|Mollusca, Bivalvia, Veneroida, Veneridae, Periglypta|HQ703328|Sanya, Hainan province, China  
*Periglypta puerpera*|Mollusca, Bivalvia, Veneroida, Veneridae, Periglypta|HQ703327|Qionghai, Hainan province, China  
*Periglypta puerpera*|Mollusca, Bivalvia, Veneroida, Veneridae, Periglypta|HQ703323|Wenchang, Hainan province, China  
*Periglypta puerpera*|Mollusca, Bivalvia, Veneroida, Veneridae, Periglypta|HQ703321|Sanya, Hainan province, China  
*Periglypta puerpera*|Mollusca, Bivalvia, Veneroida, Veneridae, Periglypta|HQ703319|Sanya, Hainan province, China  
*Periglypta puerpera*|Mollusca, Bivalvia, Veneroida, Veneridae, Periglypta|HQ703320|Sanya, Hainan province, China  
*Periglypta puerpera*|Mollusca, Bivalvia, Veneroida, Veneridae, Periglypta|HQ703318|Sanya, Hainan province, China  
*Periglypta puerpera*|Mollusca, Bivalvia, Veneroida, Veneridae, Periglypta|HQ703326|Qionghai, Hainan province, China  
*Periglypta puerpera*|Mollusca, Bivalvia, Veneroida, Veneridae, Periglypta|HQ703324|Wenchang, Hainan province, China  
*Periglypta puerpera*|Mollusca, Bivalvia, Veneroida, Veneridae, Periglypta|HQ703322|Linsui, Hainan province, China  
*Periglypta puerpera*|Mollusca, Bivalvia, Veneroida, Veneridae, Periglypta|HQ703325|Qionghai, Hainan province, China  
*Globivenus toreuma*|Mollusca, Bivalvia, Veneroida, Veneridae, Globivenus|HQ703342|Lingao, Hainan province, China  
*Globivenus lamellaris*|Mollusca, Bivalvia, Veneroida, Veneridae, Globivenus|HM124608|China  
*Globivenus lamellaris*|Mollusca, Bivalvia, Veneroida, Veneridae, Globivenus|HQ703341|Beihai, Guangxi province, China  
*Globivenus lamellaris*|Mollusca, Bivalvia, Veneroida, Veneridae, Globivenus|HQ703339|Beihai, Guangxi province, China  
*Globivenus lamellaris*|Mollusca, Bivalvia, Veneroida, Veneridae, Globivenus|HQ703337|Beihai, Guangxi province, China  
*Globivenus lamellaris*|Mollusca, Bivalvia, Veneroida, Veneridae, Globivenus|HQ703335|Sanya, Hainan province, China  
*Globivenus lamellaris*|Mollusca, Bivalvia, Veneroida, Veneridae, Globivenus|HQ703334|Sanya, Hainan province, China  
*Globivenus lamellaris*|Mollusca, Bivalvia, Veneroida, Veneridae, Globivenus|HQ703336|Sanya, Hainan province, China  
*Globivenus lamellaris*|Mollusca, Bivalvia, Veneroida, Veneridae, Globivenus|HQ703338|Beihai, Guangxi province, China  
*Globivenus lamellaris*|Mollusca, Bivalvia, Veneroida, Veneridae, Globivenus|HQ703340|Beihai, Guangxi province, China  
*Periglypta chemnitzii*|Mollusca, Bivalvia, Veneroida, Veneridae, Globivenus|HM124614|China  
*Periglypta chemnitzii*|Mollusca, Bivalvia, Veneroida, Veneridae, Globivenus|HQ703333|Beihai, Guangxi province, China  
*Periglypta chemnitzii*|Mollusca, Bivalvia, Veneroida, Veneridae, Globivenus|HQ703332|Beihai, Guangxi province, China  
*Periglypta chemnitzii*|Mollusca, Bivalvia, Veneroida, Veneridae, Globivenus|HQ703331|Beihai, Guangxi province, China  
*Periglypta chemnitzii*|Mollusca, Bivalvia, Veneroida, Veneridae, Globivenus|HQ703330|Beihai, Guangxi province, China

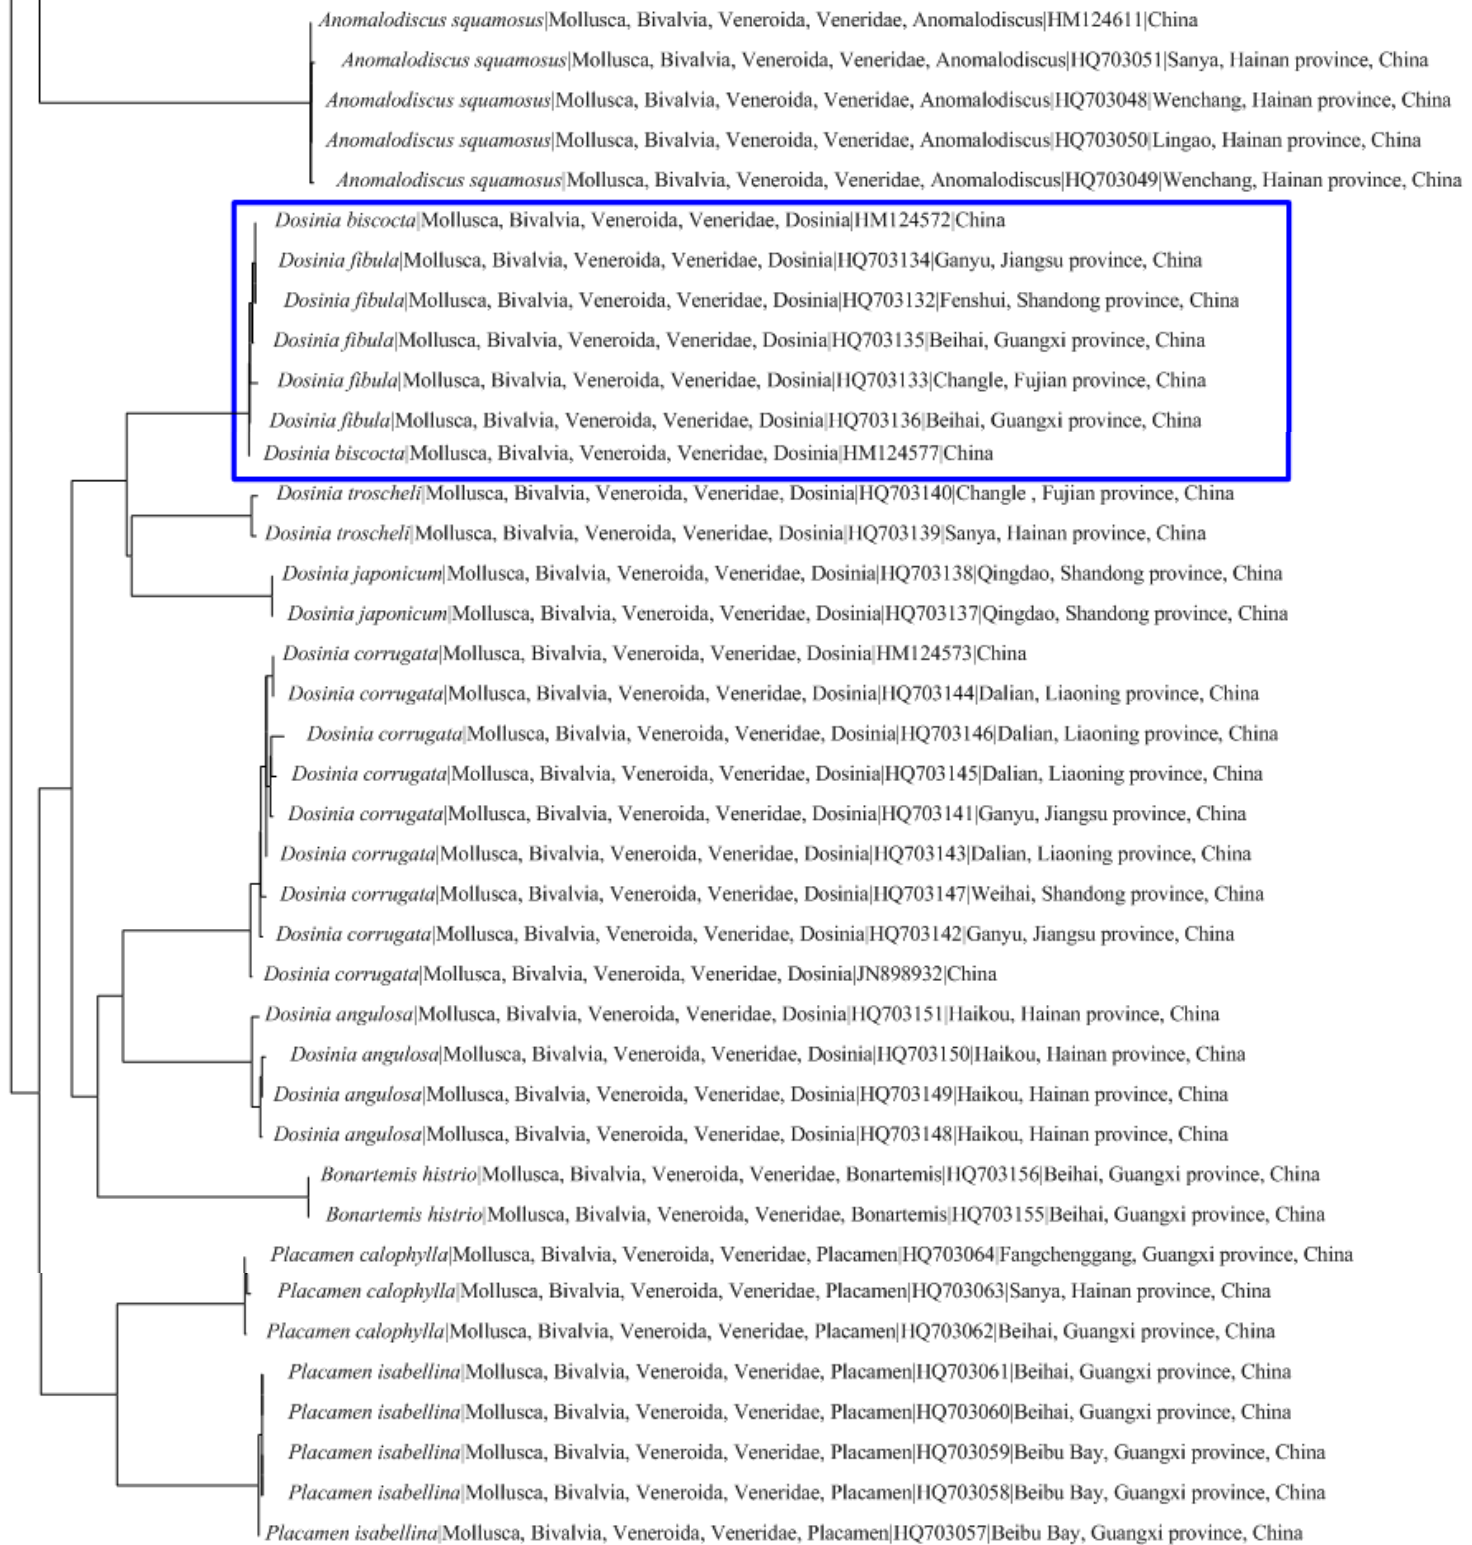

*Protothaca jedoensis*[Mollusca, Bivalvia, Veneroida, Veneridae, Protothaca|HM124605|China  
*Protothaca jedoensis*[Mollusca, Bivalvia, Veneroida, Veneridae, Protothaca|HQ703065|Haiyang, Shandong province, China  
*Protothaca jedoensis*[Mollusca, Bivalvia, Veneroida, Veneridae, Protothaca|HM124607|China  
*Protothaca jedoensis*[Mollusca, Bivalvia, Veneroida, Veneridae, Protothaca|HQ703066|Ganyu, Jiangsu province, China  
*Protothaca jedoensis*[Mollusca, Bivalvia, Veneroida, Veneridae, Protothaca|HQ703068|Qingdao, Shandong province, China  
*Protothaca jedoensis*[Mollusca, Bivalvia, Veneroida, Veneridae, Protothaca|HQ703067|Ganyu, Jiangsu province, China  
*Protothaca jedoensis*[Mollusca, Bivalvia, Veneroida, Veneridae, Protothaca|HQ703070|Rushan, Shandong province, China  
*Protothaca jedoensis*[Mollusca, Bivalvia, Veneroida, Veneridae, Protothaca|HQ703069|Qingdao, Shandong province, China

*Meretrix lusoria*[Mollusca, Bivalvia, Veneroida, Veneridae, Meretrix|AB280786|Oita, Japan  
*Meretrix lusoria*[Mollusca, Bivalvia, Veneroida, Veneridae, Meretrix|AB613023|Kyoto, Asokai Lagoon, Japan  
*Meretrix lusoria*[Mollusca, Bivalvia, Veneroida, Veneridae, Meretrix|AB853864|Aomori, Mutsu, Japan  
*Meretrix lusoria*[Mollusca, Bivalvia, Veneroida, Veneridae, Meretrix|AB853865|Kumamoto Matsushima, Japan  
*Meretrix lusoria*[Mollusca, Bivalvia, Veneroida, Veneridae, Meretrix|AB613022|Kyoto, Asokai Lagoon, Japan  
*Meretrix lusoria*[Mollusca, Bivalvia, Veneroida, Veneridae, Meretrix|AB076924|Aich, Yokkaichi, Japan  
*Meretrix petechialis*[Mollusca, Bivalvia, Veneroida, Veneridae, Meretrix|HQ703167|Ganyu, Jiangsu province, China  
*Meretrix petechialis*[Mollusca, Bivalvia, Veneroida, Veneridae, Meretrix|HQ703164|Panjin, Liaoning province, China  
*Meretrix petechialis*[Mollusca, Bivalvia, Veneroida, Veneridae, Meretrix|HQ703165|Panjin, Liaoning province, China  
*Meretrix petechialis*[Mollusca, Bivalvia, Veneroida, Veneridae, Meretrix|HQ703171|Nanyang, Jiangsu province, China  
*Meretrix petechialis*[Mollusca, Bivalvia, Veneroida, Veneridae, Meretrix|HM124584|China  
*Meretrix petechialis*[Mollusca, Bivalvia, Veneroida, Veneridae, Meretrix|HQ703172|Fenshui, Shandong province, China  
*Meretrix petechialis*[Mollusca, Bivalvia, Veneroida, Veneridae, Meretrix|HQ703169|Nanyang, Jiangsu province, China  
*Meretrix meretrix*[Mollusca, Bivalvia, Veneroida, Veneridae, Meretrix|DQ399400|China  
*Meretrix petechialis*[Mollusca, Bivalvia, Veneroida, Veneridae, Meretrix|HQ703168|Ganyu, Jiangsu province, China  
*Meretrix meretrix*[Mollusca, Bivalvia, Veneroida, Veneridae, Meretrix|DQ399402|China  
*Meretrix petechialis*[Mollusca, Bivalvia, Veneroida, Veneridae, Meretrix|AB853869|China  
*Meretrix meretrix*[Mollusca, Bivalvia, Veneroida, Veneridae, Meretrix|DQ399401|China  
*Meretrix meretrix*[Mollusca, Bivalvia, Veneroida, Veneridae, Meretrix|DQ399398|China  
*Meretrix meretrix*[Mollusca, Bivalvia, Veneroida, Veneridae, Meretrix|JN898949|China  
*Meretrix petechialis*[Mollusca, Bivalvia, Veneroida, Veneridae, Meretrix|HQ703170|Nanyang, Jiangsu province, China  
*Meretrix petechialis*[Mollusca, Bivalvia, Veneroida, Veneridae, Meretrix|HQ703166|Ganyu, Jiangsu province, China  
*Meretrix lusoria*[Mollusca, Bivalvia, Veneroida, Veneridae, Meretrix|FJ434681|China  
*Meretrix meretrix*[Mollusca, Bivalvia, Veneroida, Veneridae, Meretrix|DQ399399|China  
*Meretrix petechialis*[Mollusca, Bivalvia, Veneroida, Veneridae, Meretrix|HM124582|China  
*Meretrix petechialis*[Mollusca, Bivalvia, Veneroida, Veneridae, Meretrix|HQ703184|Yueqing, Zhejiang province, China  
*Meretrix petechialis*[Mollusca, Bivalvia, Veneroida, Veneridae, Meretrix|HQ703178|Beihai, Guangxi province, China  
*Meretrix petechialis*[Mollusca, Bivalvia, Veneroida, Veneridae, Meretrix|HQ703174|Xiamen, Fujian province, China  
*Meretrix petechialis*[Mollusca, Bivalvia, Veneroida, Veneridae, Meretrix|HQ703175|Xiamen, Fujian province, China  
*Meretrix petechialis*[Mollusca, Bivalvia, Veneroida, Veneridae, Meretrix|HQ703176|Zhanjiang, Guangdong province, China  
*Meretrix petechialis*[Mollusca, Bivalvia, Veneroida, Veneridae, Meretrix|HQ703182|Haikou, Hainan province, China

*Meretrix petechialis*[Mollusca, Bivalvia, Veneroida, Veneridae, Meretrix|HQ703181|Haikou, Hainan province, China  
*Meretrix petechialis*[Mollusca, Bivalvia, Veneroida, Veneridae, Meretrix|HM124583|China  
*Meretrix lusoria*[Mollusca, Bivalvia, Veneroida, Veneridae, Meretrix|JN043624|China  
*Meretrix lusoria*[Mollusca, Bivalvia, Veneroida, Veneridae, Meretrix|JN898935|China  
*Meretrix lusoria*[Mollusca, Bivalvia, Veneroida, Veneridae, Meretrix|JN898936|China  
*Meretrix petechialis*[Mollusca, Bivalvia, Veneroida, Veneridae, Meretrix|HQ703187|Yangjiang, Guangdong province, China  
*Meretrix petechialis*[Mollusca, Bivalvia, Veneroida, Veneridae, Meretrix|HQ703173|Sanya, Hainan province, China  
*Meretrix petechialis*[Mollusca, Bivalvia, Veneroida, Veneridae, Meretrix|HQ703186|Beihai, Guangxi province, China  
*Meretrix petechialis*[Mollusca, Bivalvia, Veneroida, Veneridae, Meretrix|HQ703180|Shantou, Guangdong province, China  
*Meretrix petechialis*[Mollusca, Bivalvia, Veneroida, Veneridae, Meretrix|HQ703177|Zhanjiang, Guangdong province, China  
*Meretrix petechialis*[Mollusca, Bivalvia, Veneroida, Veneridae, Meretrix|HQ703185|Beihai, Guangxi province, China  
*Meretrix petechialis*[Mollusca, Bivalvia, Veneroida, Veneridae, Meretrix|HO703179|Beihai, Guangxi province, China  
*Meretrix petechialis*[Mollusca, Bivalvia, Veneroida, Veneridae, Meretrix|HQ703183|Lingao, Hainan province, China  
*Meretrix meretrix*[Mollusca, Bivalvia, Veneroida, Veneridae, Meretrix|JN043623|China  
*Meretrix meretrix*[Mollusca, Bivalvia, Veneroida, Veneridae, Meretrix|HM124578|China  
*Meretrix meretrix*[Mollusca, Bivalvia, Veneroida, Veneridae, Meretrix|HQ703163|Weizhou Island, Hainan province, China  
*Meretrix meretrix*[Mollusca, Bivalvia, Veneroida, Veneridae, Meretrix|HQ703162|Beihai, Guangxi province, China  
*Meretrix meretrix*[Mollusca, Bivalvia, Veneroida, Veneridae, Meretrix|HQ703161|Lingao, Hainan province, China  
*Meretrix meretrix*[Mollusca, Bivalvia, Veneroida, Veneridae, Meretrix|HQ703159|Lingao, Hainan province, China  
*Meretrix meretrix*[Mollusca, Bivalvia, Veneroida, Veneridae, Meretrix|HQ703160|Lingao, Hainan province, China  
*Meretrix lyrata*[Mollusca, Bivalvia, Veneroida, Veneridae, Meretrix|HM124580|China  
*Meretrix lyrata*[Mollusca, Bivalvia, Veneroida, Veneridae, Meretrix|HM124581|China  
*Meretrix lyrata*[Mollusca, Bivalvia, Veneroida, Veneridae, Meretrix|JN043622|China  
*Meretrix lyrata*[Mollusca, Bivalvia, Veneroida, Veneridae, Meretrix|HQ703198|Wenchang, Hainan province, China  
*Meretrix lyrata*[Mollusca, Bivalvia, Veneroida, Veneridae, Meretrix|HQ703197|Beihai, Guangxi province, China  
*Meretrix lyrata*[Mollusca, Bivalvia, Veneroida, Veneridae, Meretrix|HQ703192|Zhangpu, Fujian province, China  
*Meretrix lyrata*[Mollusca, Bivalvia, Veneroida, Veneridae, Meretrix|HQ703195|Sanya, Hainan province, China  
*Meretrix lyrata*[Mollusca, Bivalvia, Veneroida, Veneridae, Meretrix|HQ703196|Sanya, Hainan province, China  
*Meretrix lyrata*[Mollusca, Bivalvia, Veneroida, Veneridae, Meretrix|HQ703194|Zhanjiang, Guangdong province, China  
*Meretrix lyrata*[Mollusca, Bivalvia, Veneroida, Veneridae, Meretrix|HQ703193|Zhangpu, Fujian province, China  
*Meretrix lyrata*[Mollusca, Bivalvia, Veneroida, Veneridae, Meretrix|JN898944|China  
*Meretrix lamarckii*[Mollusca, Bivalvia, Veneroida, Veneridae, Meretrix|JN043625|China  
*Meretrix lamarckii*[Mollusca, Bivalvia, Veneroida, Veneridae, Meretrix|HM124579|China  
*Meretrix lamarckii*[Mollusca, Bivalvia, Veneroida, Veneridae, Meretrix|HQ703191|Sanya, Hainan province, China  
*Meretrix lamarckii*[Mollusca, Bivalvia, Veneroida, Veneridae, Meretrix|HQ703190|Haikou, Hainan province, China  
*Meretrix lamarckii*[Mollusca, Bivalvia, Veneroida, Veneridae, Meretrix|HQ703188|Haikou, Hainan province, China  
*Meretrix lamarckii*[Mollusca, Bivalvia, Veneroida, Veneridae, Meretrix|HQ703189|Haikou, Hainan province, China  
*Callista brevisiphonata*[Mollusca, Bivalvia, Veneroida, Veneridae, Callista|HM124569|China  
*Callista brevisiphonata*[Mollusca, Bivalvia, Veneroida, Veneridae, Callista|HQ703040|Qingdao, Shandong province, China  
*Callista brevisiphonata*[Mollusca, Bivalvia, Veneroida, Veneridae, Callista|JN898931|China



*Callista brevisiphonata*[Mollusca, Bivalvia, Veneroidea, Veneridae, Callista|HQ703039|Qingdao, Shandong province, China  
*Callista brevisiphonata*[Mollusca, Bivalvia, Veneroidea, Veneridae, Callista|HQ703038|Qingdao, Shandong province, China  
*Callista brevisiphonata*[Mollusca, Bivalvia, Veneroidea, Veneridae, Callista|HQ703037|Qingdao, Shandong province, China

*Saxidomus purpuratus*[Mollusca, Bivalvia, Veneroidea, Veneridae, Saxidomus|EU118007|China  
*Saxidomus purpuratus*[Mollusca, Bivalvia, Veneroidea, Veneridae, Saxidomus|KP419933|China  
*Saxidomus purpuratus*[Mollusca, Bivalvia, Veneroidea, Veneridae, Saxidomus|HQ703047|Dalian, Liaoning province, China  
*Saxidomus purpuratus*[Mollusca, Bivalvia, Veneroidea, Veneridae, Saxidomus|HQ703042|Panjin, Liaoning province, China  
*Saxidomus purpuratus*[Mollusca, Bivalvia, Veneroidea, Veneridae, Saxidomus|HQ703045|Dalian, Liaoning province, China  
*Saxidomus purpuratus*[Mollusca, Bivalvia, Veneroidea, Veneridae, Saxidomus|HQ703046|Dalian, Liaoning province, China  
*Saxidomus purpuratus*[Mollusca, Bivalvia, Veneroidea, Veneridae, Saxidomus|HQ703041|Panjin, Liaoning province, China  
*Saxidomus purpuratus*[Mollusca, Bivalvia, Veneroidea, Veneridae, Saxidomus|HM124571|China  
*Saxidomus purpuratus*[Mollusca, Bivalvia, Veneroidea, Veneridae, Saxidomus|JN898951|China  
*Saxidomus purpuratus*[Mollusca, Bivalvia, Veneroidea, Veneridae, Saxidomus|HQ703044|Panjin, Liaoning province, China  
*Saxidomus purpuratus*[Mollusca, Bivalvia, Veneroidea, Veneridae, Saxidomus|HQ703043|Panjin, Liaoning province, China

*Cyclina sinensis*[Mollusca, Bivalvia, Veneroidea, Veneridae, Cyclina|HM021147|Japan  
*Cyclina sinensis*[Mollusca, Bivalvia, Veneroidea, Veneridae, Cyclina|HM021148|Japan  
*Cyclina sinensis*[Mollusca, Bivalvia, Veneroidea, Veneridae, Cyclina|HM021149|Japan  
*Cyclina sinensis*[Mollusca, Bivalvia, Veneroidea, Veneridae, Cyclina|HQ703131|Xiangshui, Jiangsu province, China  
*Cyclina sinensis*[Mollusca, Bivalvia, Veneroidea, Veneridae, Cyclina|HQ703129|Changyi, Shandong province, China  
*Cyclina sinensis*[Mollusca, Bivalvia, Veneroidea, Veneridae, Cyclina|HQ703128|Tanggu, Tianjin, China  
*Cyclina sinensis*[Mollusca, Bivalvia, Veneroidea, Veneridae, Cyclina|HQ703124|Lvshun, Liaoning province, China  
*Cyclina sinensis*[Mollusca, Bivalvia, Veneroidea, Veneridae, Cyclina|HQ703122|Jimo, Shandong province, China  
*Cyclina sinensis*[Mollusca, Bivalvia, Veneroidea, Veneridae, Cyclina|HQ703120|Panjin, Liaoning province, China  
*Cyclina sinensis*[Mollusca, Bivalvia, Veneroidea, Veneridae, Cyclina|HQ703116|Shengsi, Zhejiang province, China  
*Cyclina sinensis*[Mollusca, Bivalvia, Veneroidea, Veneridae, Cyclina|HQ703117|Yueqing, Zhejiang province, China  
*Cyclina sinensis*[Mollusca, Bivalvia, Veneroidea, Veneridae, Cyclina|HQ703119|Qinhuangdao, Hebei province, China  
*Cyclina sinensis*[Mollusca, Bivalvia, Veneroidea, Veneridae, Cyclina|HQ703118|Dandong, Liaoning province, China  
*Cyclina sinensis*[Mollusca, Bivalvia, Veneroidea, Veneridae, Cyclina|HQ703115|Zhoushan, Zhejiang province, China  
*Cyclina sinensis*[Mollusca, Bivalvia, Veneroidea, Veneridae, Cyclina|HQ703130|Xiamen, Fujian province, China  
*Cyclina sinensis*[Mollusca, Bivalvia, Veneroidea, Veneridae, Cyclina|HQ703127|Sanya, Hainan province, China  
*Cyclina sinensis*[Mollusca, Bivalvia, Veneroidea, Veneridae, Cyclina|HQ703125|Maoming, Guangdong province, China  
*Cyclina sinensis*[Mollusca, Bivalvia, Veneroidea, Veneridae, Cyclina|HQ703121|Dongxing, Guangxi province, China  
*Cyclina sinensis*[Mollusca, Bivalvia, Veneroidea, Veneridae, Cyclina|HQ703123|Lianyuangang, Jiangsu province, China  
*Cyclina sinensis*[Mollusca, Bivalvia, Veneroidea, Veneridae, Cyclina|HQ703126|Qidong, Jiangsu province, China

*Cyclosunetta menstrualis*[Mollusca, Bivalvia, Veneroidea, Veneridae, Cyclosunetta|HM124588|China  
*Cyclosunetta menstrualis*[Mollusca, Bivalvia, Veneroidea, Veneridae, Cyclosunetta|HQ703216|Fenshui, Shandong province, China  
*Cyclosunetta menstrualis*[Mollusca, Bivalvia, Veneroidea, Veneridae, Cyclosunetta|HQ703214|Fenshui, Shandong province, China  
*Cyclosunetta menstrualis*[Mollusca, Bivalvia, Veneroidea, Veneridae, Cyclosunetta|HQ703215|Fenshui, Shandong province, China  
*Cyclosunetta menstrualis*[Mollusca, Bivalvia, Veneroidea, Veneridae, Cyclosunetta|HQ703213|Fenshui, Shandong province, China

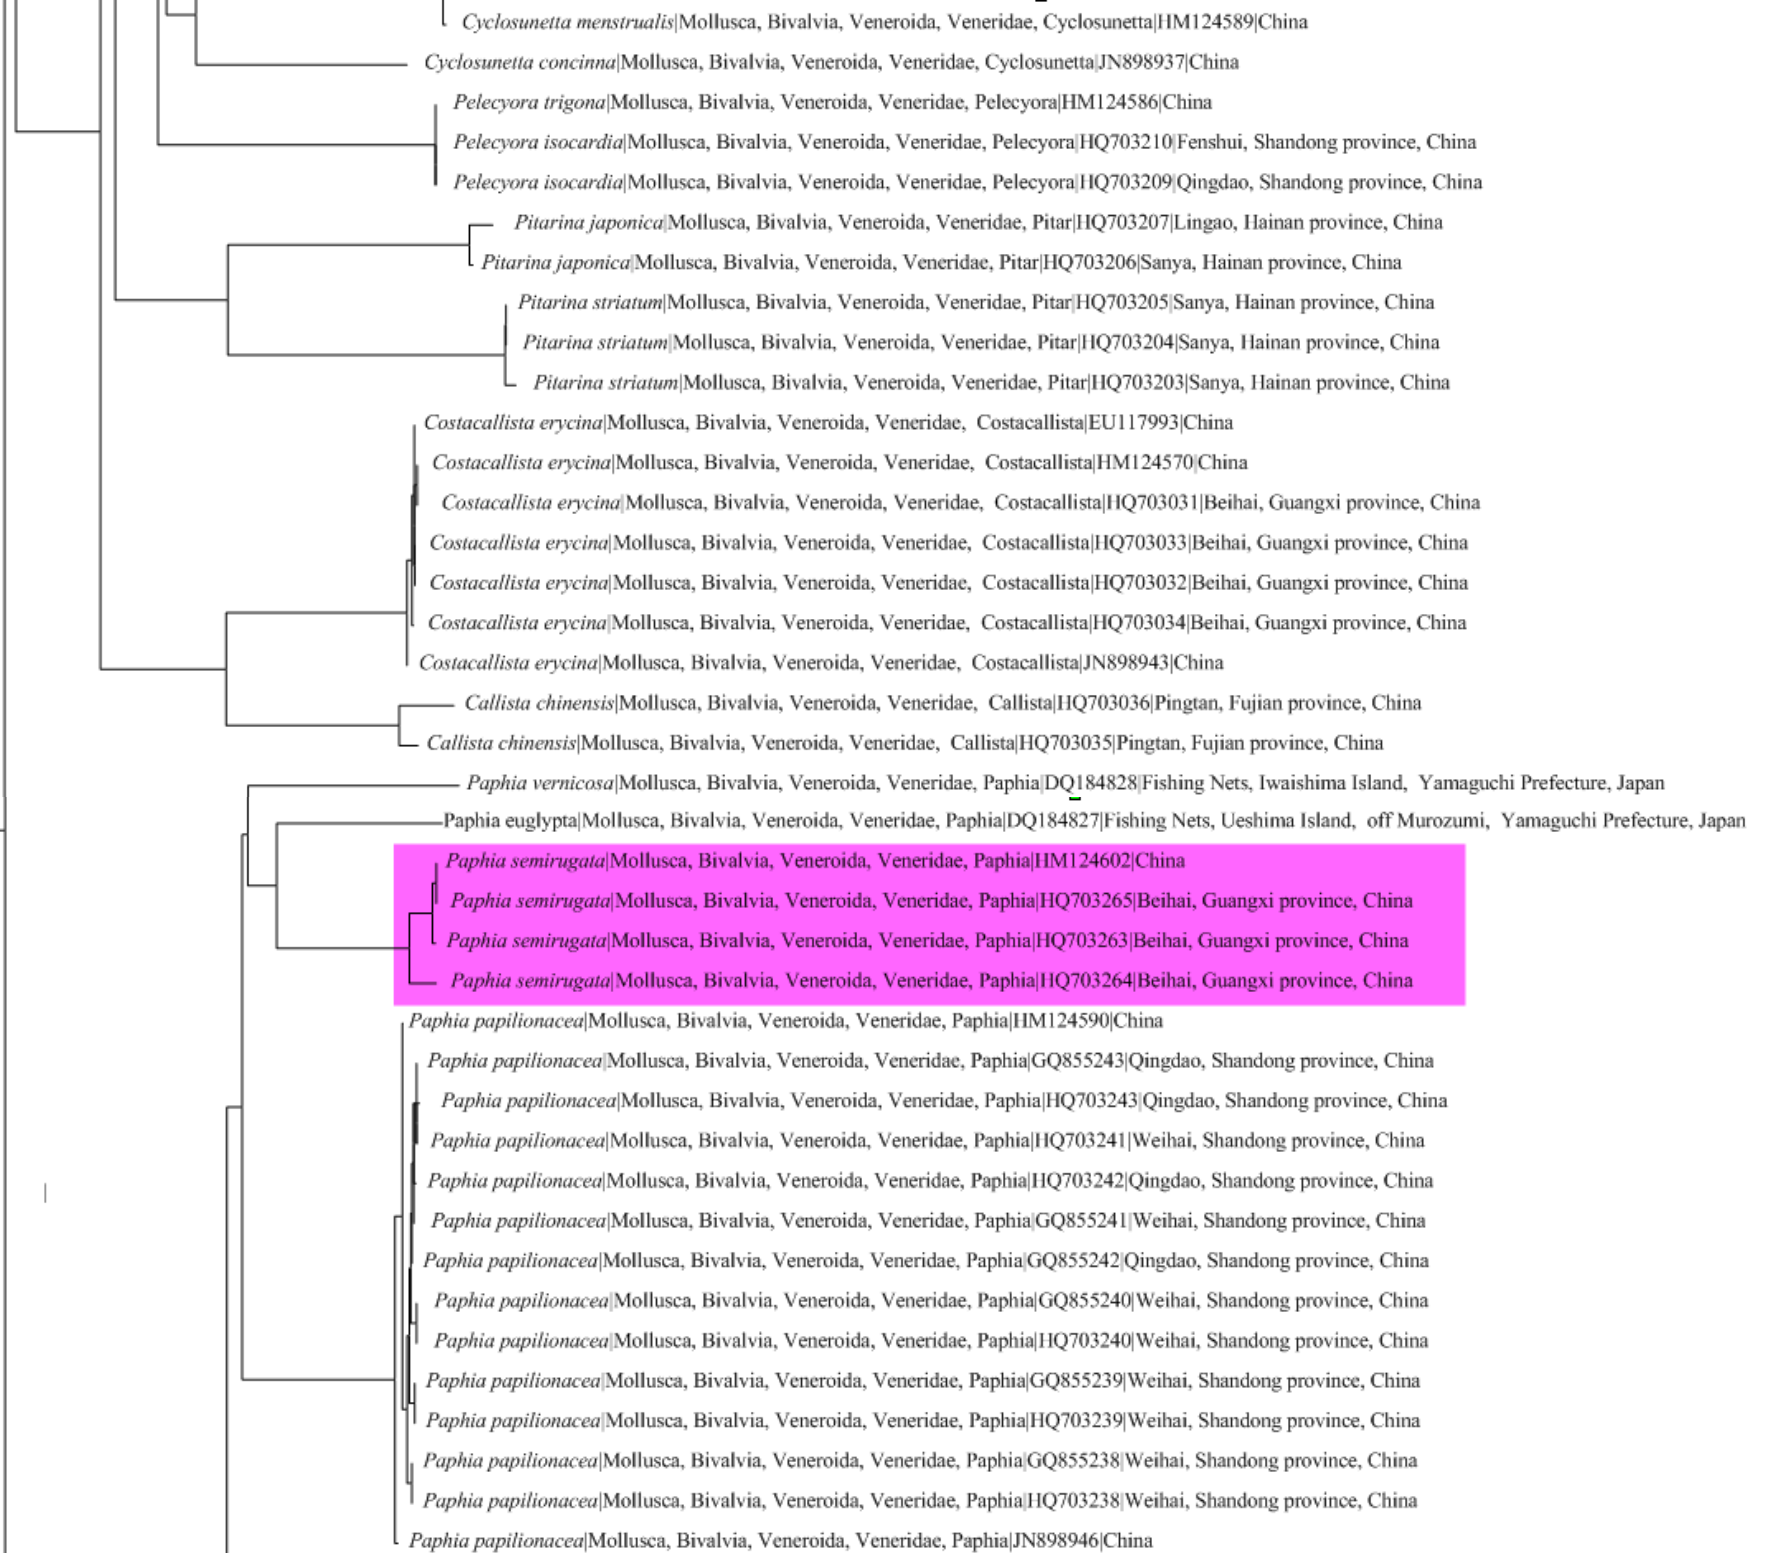

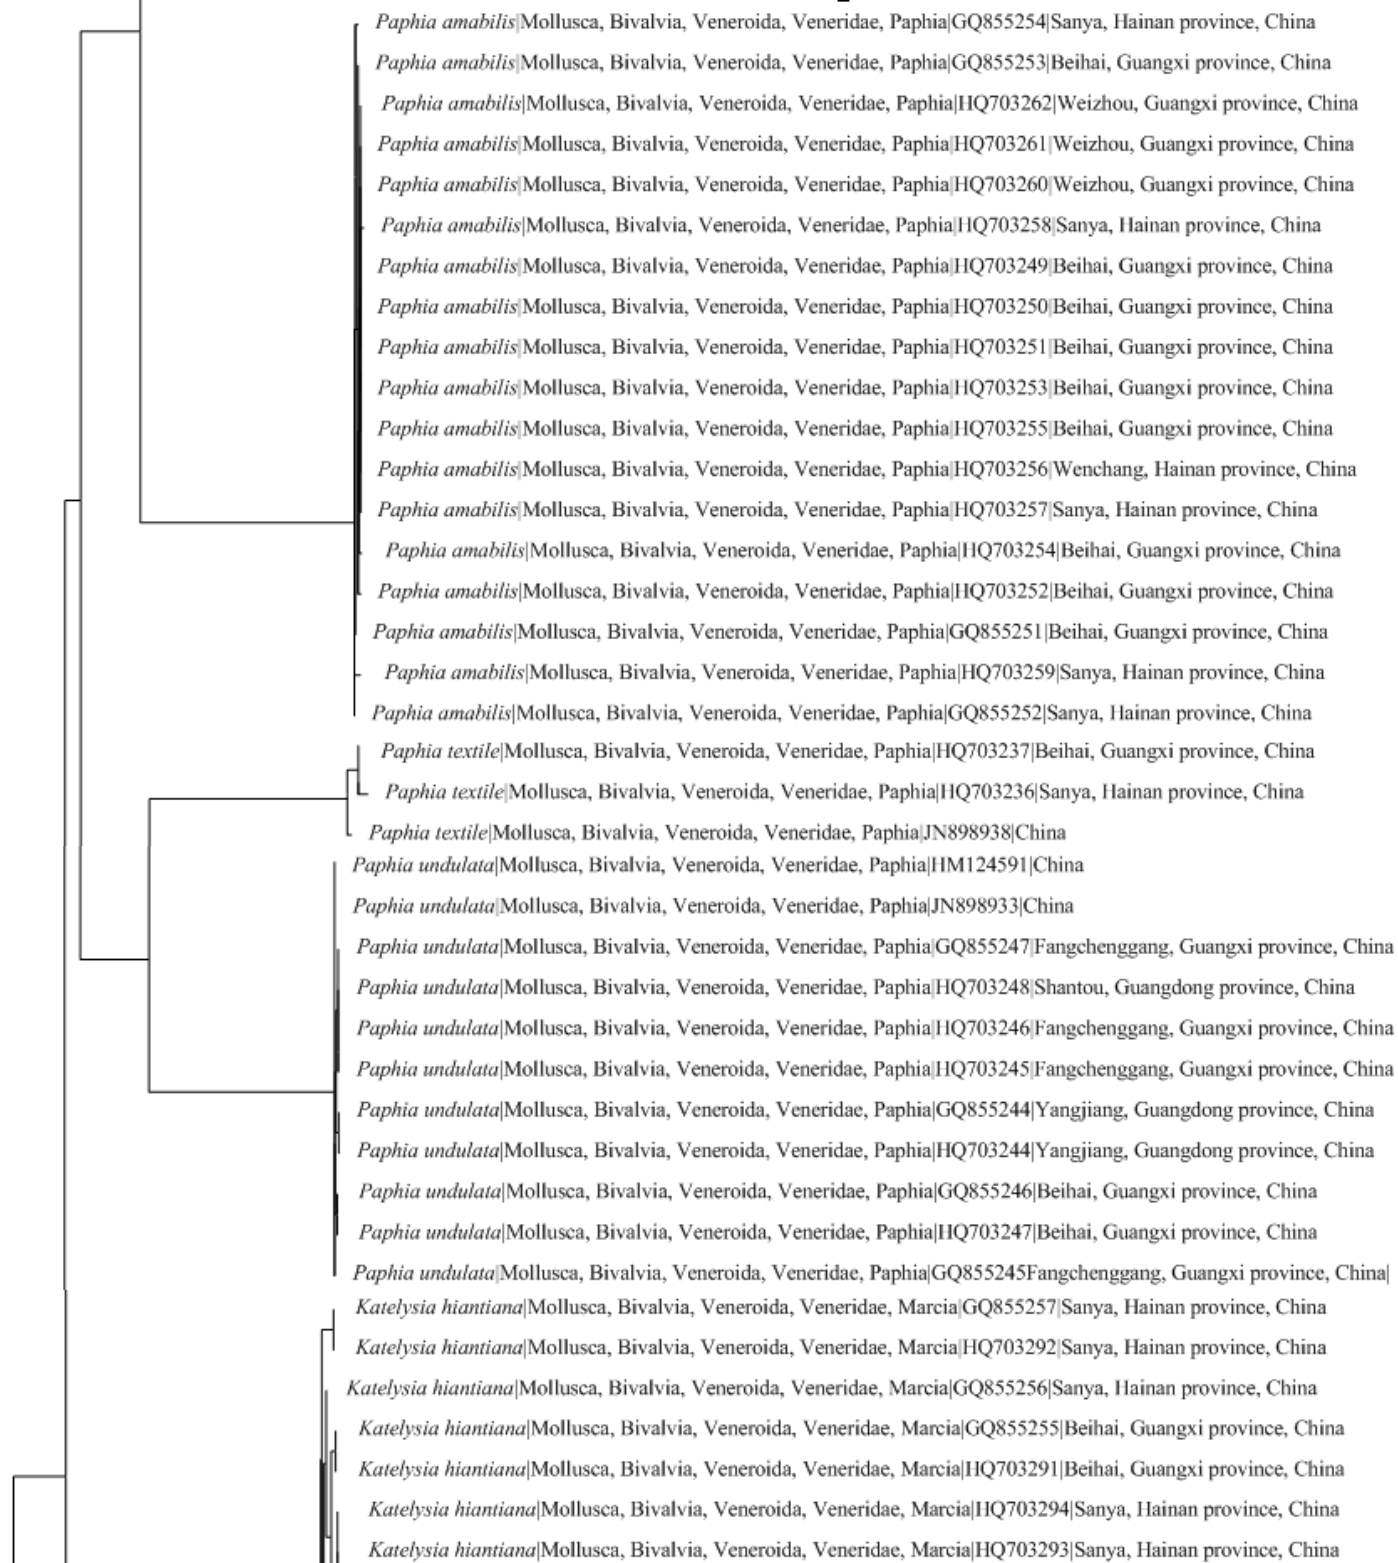

*Katelysia hiantiana*[Mollusca, Bivalvia, Veneroidea, Veneridae, Marcia|HQ703289|Maoming, Guangdong province, China  
*Katelysia hiantiana*[Mollusca, Bivalvia, Veneroidea, Veneridae, Marcia|HQ703287|Lingshui, Hainan province, China  
*Katelysia hiantiana*[Mollusca, Bivalvia, Veneroidea, Veneridae, Marcia|HQ703288|Zhanjiang, Guangdong province, China  
*Katelysia hiantiana*[Mollusca, Bivalvia, Veneroidea, Veneridae, Marcia|HQ703290|Beihai, Guangxi province, China  
*Katelysia hiantina*[Mollusca, Bivalvia, Veneroidea, Veneridae, Katelysia|HM124599|China  
*Katelysia hiantina*[Mollusca, Bivalvia, Veneroidea, Veneridae, Katelysia|JN898939|China  
*Marcia marmorata*[Mollusca, Bivalvia, Veneroidea, Veneridae, Marcia|HQ703303|Baimajing, Hainan province, China  
*Marcia marmorata*[Mollusca, Bivalvia, Veneroidea, Veneridae, Marcia|HQ703302|Beihai, Guangxi province, China  
*Marcia marmorata*[Mollusca, Bivalvia, Veneroidea, Veneridae, Marcia|HQ703300|Beihai, Guangxi province, China  
*Marcia marmorata*[Mollusca, Bivalvia, Veneroidea, Veneridae, Marcia|HQ703299|Beihai, Guangxi province, China  
*Marcia marmorata*[Mollusca, Bivalvia, Veneroidea, Veneridae, Marcia|HQ703296|Sanya, Hainan province, China  
*Marcia marmorata*[Mollusca, Bivalvia, Veneroidea, Veneridae, Marcia|HQ703297|Sanya, Hainan province, China  
*Marcia marmorata*[Mollusca, Bivalvia, Veneroidea, Veneridae, Marcia|HQ703301|Beihai, Guangxi province, China  
*Marcia marmorata*[Mollusca, Bivalvia, Veneroidea, Veneridae, Marcia|HQ703298|Beihai, Guangxi province, China  
*Tapes dorsatus*[Mollusca, Bivalvia, Veneroidea, Veneridae, Tapes|HM124594|China  
*Tapes dorsatus*[Mollusca, Bivalvia, Veneroidea, Veneridae, Tapes|GQ855277|Beihai, Guangxi province, China  
*Tapes dorsatus*[Mollusca, Bivalvia, Veneroidea, Veneridae, Tapes|HQ703230|Beihai, Guangxi province, China  
*Tapes dorsatus*[Mollusca, Bivalvia, Veneroidea, Veneridae, Tapes|HQ703228|Beihai, Guangxi province, China  
*Tapes dorsatus*[Mollusca, Bivalvia, Veneroidea, Veneridae, Tapes|HQ703225|Hepu, Guangxi province, China  
*Tapes dorsatus*[Mollusca, Bivalvia, Veneroidea, Veneridae, Tapes|HQ703224|Hepu, Guangxi province, China  
*Tapes dorsatus*[Mollusca, Bivalvia, Veneroidea, Veneridae, Tapes|HQ703227|Hepu, Guangxi province, China  
*Tapes dorsatus*[Mollusca, Bivalvia, Veneroidea, Veneridae, Tapes|HQ703226|Hepu, Guangxi province, China  
*Tapes dorsatus*[Mollusca, Bivalvia, Veneroidea, Veneridae, Tapes|HQ703229|Beihai, Guangxi province, China  
*Tapes dorsatus*[Mollusca, Bivalvia, Veneroidea, Veneridae, Tapes|JN898942|China  
*Marcia japonica*[Mollusca, Bivalvia, Veneroidea, Veneridae, Marcia|GQ855262|Wenchang, Hainan province, China  
*Marcia japonica*[Mollusca, Bivalvia, Veneroidea, Veneridae, Marcia|HQ703285|Wenchang, Hainan province, China  
*Marcia japonica*[Mollusca, Bivalvia, Veneroidea, Veneridae, Marcia|HQ703284|Sanya, Hainan province, China  
*Marcia japonica*[Mollusca, Bivalvia, Veneroidea, Veneridae, Marcia|HQ703283|Sanya, Hainan province, China  
*Marcia japonica*[Mollusca, Bivalvia, Veneroidea, Veneridae, Marcia|HQ703282|Sanya, Hainan province, China  
*Marcia japonica*[Mollusca, Bivalvia, Veneroidea, Veneridae, Marcia|HQ703286|Wenchang, Hainan province, China  
*Marcia japonica*[Mollusca, Bivalvia, Veneroidea, Veneridae, Marcia|GQ855258|Sanya, Hainan province, China  
*Marcia japonica*[Mollusca, Bivalvia, Veneroidea, Veneridae, Marcia|GQ855261|Wenchang, Hainan province, China  
*Marcia japonica*[Mollusca, Bivalvia, Veneroidea, Veneridae, Marcia|GQ855259|Sanya, Hainan province, China  
*Marcia japonica*[Mollusca, Bivalvia, Veneroidea, Veneridae, Marcia|GQ855260|Sanya, Hainan province, China  
*Tapes literatus*[Mollusca, Bivalvia, Veneroidea, Veneridae, Tapes|HM124603|China  
*Tapes literatus*[Mollusca, Bivalvia, Veneroidea, Veneridae, Tapes|JN898941|China  
*Tapes literatus*[Mollusca, Bivalvia, Veneroidea, Veneridae, Tapes|GQ855280|Sanya, Hainan province, China  
*Tapes literatus*[Mollusca, Bivalvia, Veneroidea, Veneridae, Tapes|GQ855279|Lingshui, Hainan province, China

*Tapes literatus*|Mollusca, Bivalvia, Veneroidea, Veneridae, Tapes|HQ703222|Sanya, Hainan province, China  
*Tapes literatus*|Mollusca, Bivalvia, Veneroidea, Veneridae, Tapes|HQ703221|Wenchang, Hainan province, China  
*Tapes literatus*|Mollusca, Bivalvia, Veneroidea, Veneridae, Tapes|HQ703220|Wenchang, Hainan province, China  
*Tapes literatus*|Mollusca, Bivalvia, Veneroidea, Veneridae, Tapes|HQ703218|Lingshui, Hainan province, China  
*Tapes literatus*|Mollusca, Bivalvia, Veneroidea, Veneridae, Tapes|GQ855278|Sanya, Hainan province, China  
*Tapes literatus*|Mollusca, Bivalvia, Veneroidea, Veneridae, Tapes|HQ703223|Sanya, Hainan province, China  
*Tapes literatus*|Mollusca, Bivalvia, Veneroidea, Veneridae, Tapes|HQ703219|Lingshui, Hainan province, China  
*Tapes literatus*|Mollusca, Bivalvia, Veneroidea, Veneridae, Tapes|HQ703217|Sanya, Hainan province, China

*Paphia gallus*|Mollusca, Bivalvia, Veneroidea, Veneridae, Paphia|JQ277803|China  
*Paphia gallus*|Mollusca, Bivalvia, Veneroidea, Veneridae, Paphia|JQ277805|China  
*Paphia gallus*|Mollusca, Bivalvia, Veneroidea, Veneridae, Paphia|JQ277807|China  
*Paphia gallus*|Mollusca, Bivalvia, Veneroidea, Veneridae, Paphia|JQ277810|China  
*Paphia gallus*|Mollusca, Bivalvia, Veneroidea, Veneridae, Paphia|HQ703235|Beihai, Guangxi province, China  
*Paphia gallus*|Mollusca, Bivalvia, Veneroidea, Veneridae, Paphia|HQ703233|Baimajing, Hainan province, China  
*Paphia gallus*|Mollusca, Bivalvia, Veneroidea, Veneridae, Paphia|GQ855249|Danzhou, Hainan province, China  
*Paphia gallus*|Mollusca, Bivalvia, Veneroidea, Veneridae, Paphia|JQ277814|China  
*Paphia gallus*|Mollusca, Bivalvia, Veneroidea, Veneridae, Paphia|JQ277812|China  
*Paphia gallus*|Mollusca, Bivalvia, Veneroidea, Veneridae, Paphia|GQ855250|Beihai, Guangxi province, China  
*Paphia gallus*|Mollusca, Bivalvia, Veneroidea, Veneridae, Paphia|HQ703234|Beihai, Guangxi province, China  
*Paphia gallus*|Mollusca, Bivalvia, Veneroidea, Veneridae, Paphia|JQ277804|China  
*Paphia gallus*|Mollusca, Bivalvia, Veneroidea, Veneridae, Paphia|GQ855248|Beihai, Guangxi province, China  
*Paphia gallus*|Mollusca, Bivalvia, Veneroidea, Veneridae, Paphia|JQ277806|China  
*Paphia gallus*|Mollusca, Bivalvia, Veneroidea, Veneridae, Paphia|JQ277808|China  
*Paphia gallus*|Mollusca, Bivalvia, Veneroidea, Veneridae, Paphia|JQ277811|China  
*Paphia gallus*|Mollusca, Bivalvia, Veneroidea, Veneridae, Paphia|JQ277813|China  
*Paphia gallus*|Mollusca, Bivalvia, Veneroidea, Veneridae, Paphia|JQ277809|China  
*Paphia gallus*|Mollusca, Bivalvia, Veneroidea, Veneridae, Paphia|HM124597|China

*Paphia sinuosa*|Mollusca, Bivalvia, Veneroidea, Veneridae, Paphia|JQ277815|China  
*Paphia sinuosa*|Mollusca, Bivalvia, Veneroidea, Veneridae, Paphia|HQ703231|Pingtan, Fujian province, China

*Geloina expansa*|Mollusca, Bivalvia, Veneroidea, Corbiculidae, Geloina|AB498812|Okinawa, Iriomote Island, Okinawa, Japan

*Geloina erosa*|Mollusca, Bivalvia, Veneroidea, Corbiculidae, Geloina|AB076927|Okinawa, Iriomote, Okinawa, Japan

*Corbicula sandai*|Mollusca, Bivalvia, Veneroidea, Corbiculidae, Corbicula|AB498811|Shiga, Lake Biwa, Japan

*Corbicula sandai*|Mollusca, Bivalvia, Veneroidea, Corbiculidae, Corbicula|AB845590|Shiga, Hikone, Lake Biwa, Japan,

*Corbicula sandai*|Mollusca, Bivalvia, Veneroidea, Corbiculidae, Corbicula|KC211278|Japan

*Corbicula sandai*|Mollusca, Bivalvia, Veneroidea, Corbiculidae, Corbicula|KC211280|Japan

*Corbicula sandai*|Mollusca, Bivalvia, Veneroidea, Corbiculidae, Corbicula|KC211279|Japan

*Corbicula sandai*|Mollusca, Bivalvia, Veneroidea, Corbiculidae, Corbicula|KC211277|Japan

*Corbicula leana*|Mollusca, Bivalvia, Veneroidea, Corbiculidae, Corbicula|ollusca|AB845591|Hyogo, minami-awaji, Hatsuo Riv, Japan

*Corbicula leana*|Mollusca, Bivalvia, Veneroidea, Corbiculidae, Corbicula|AB498810|Fukuoka, Chikugo River, Japan

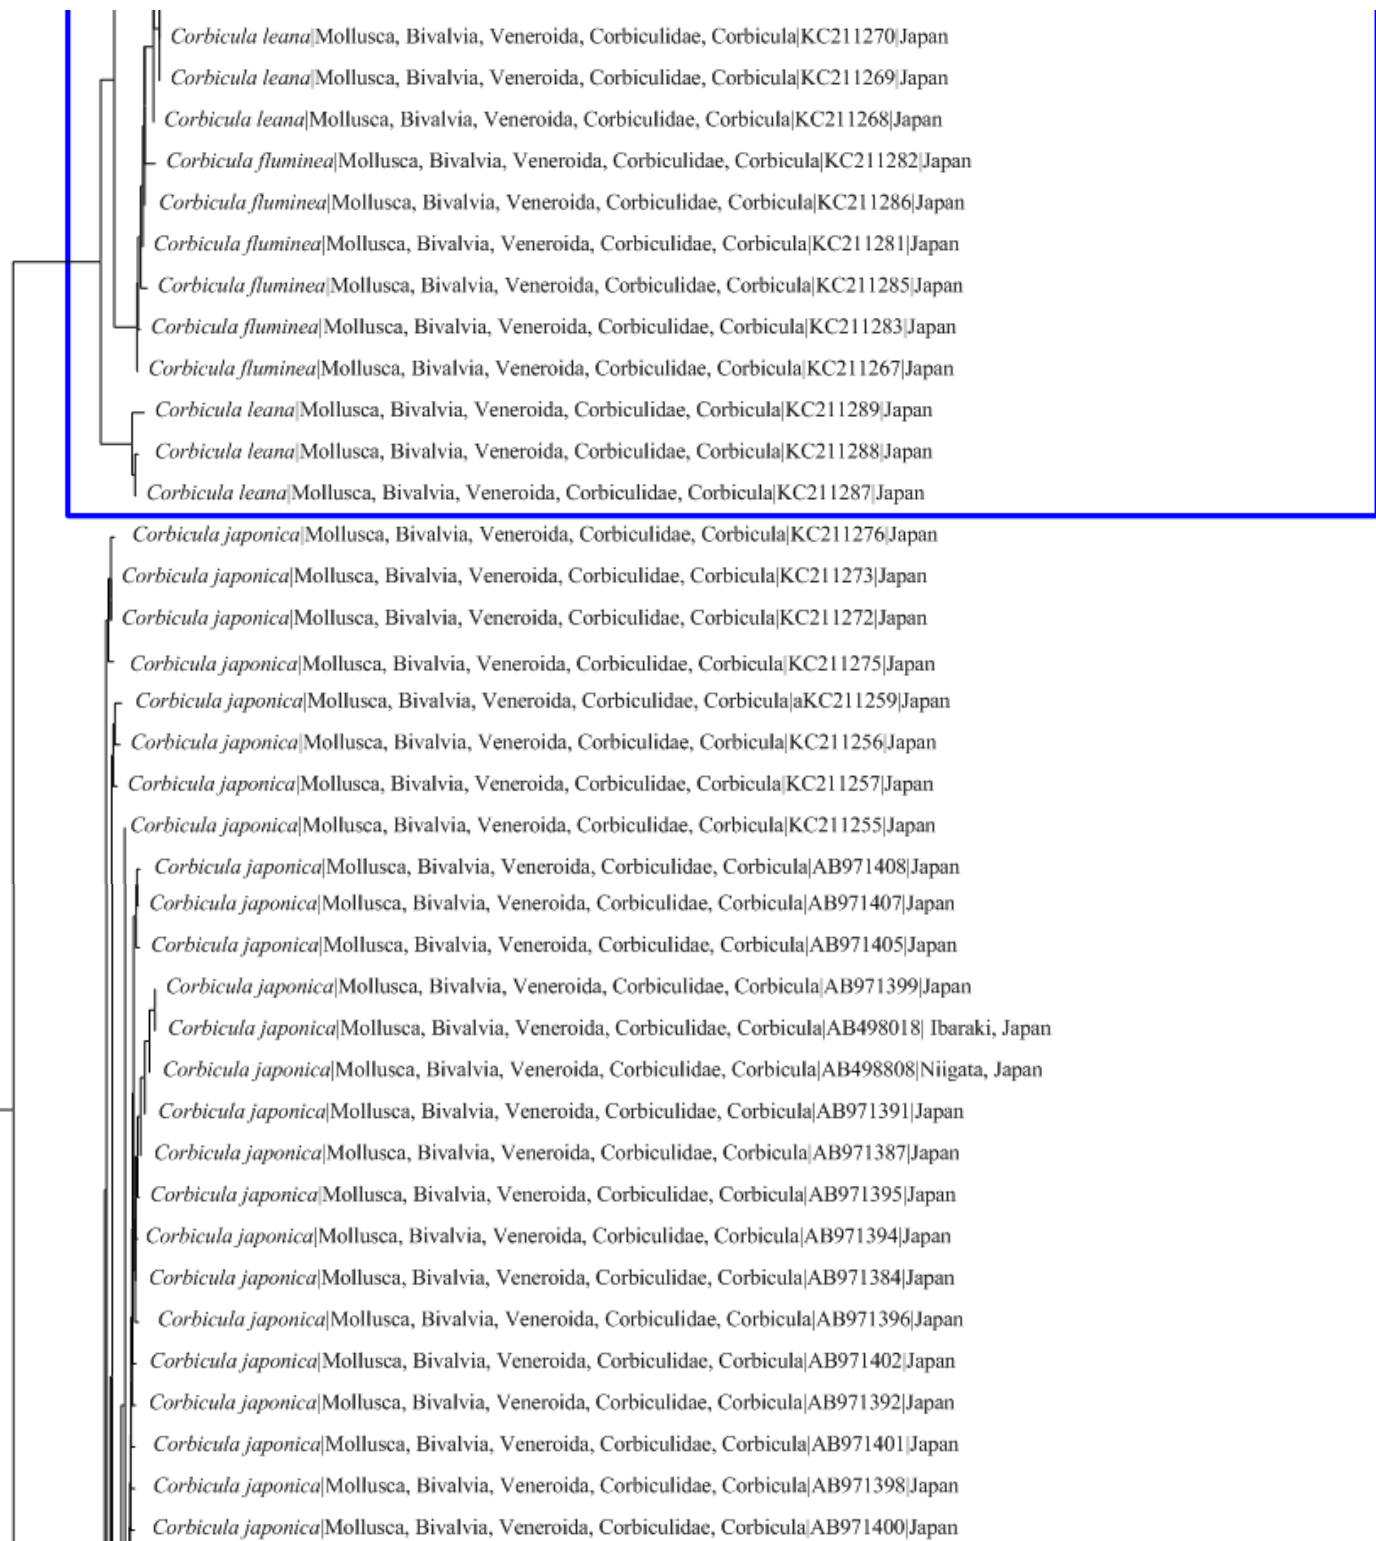

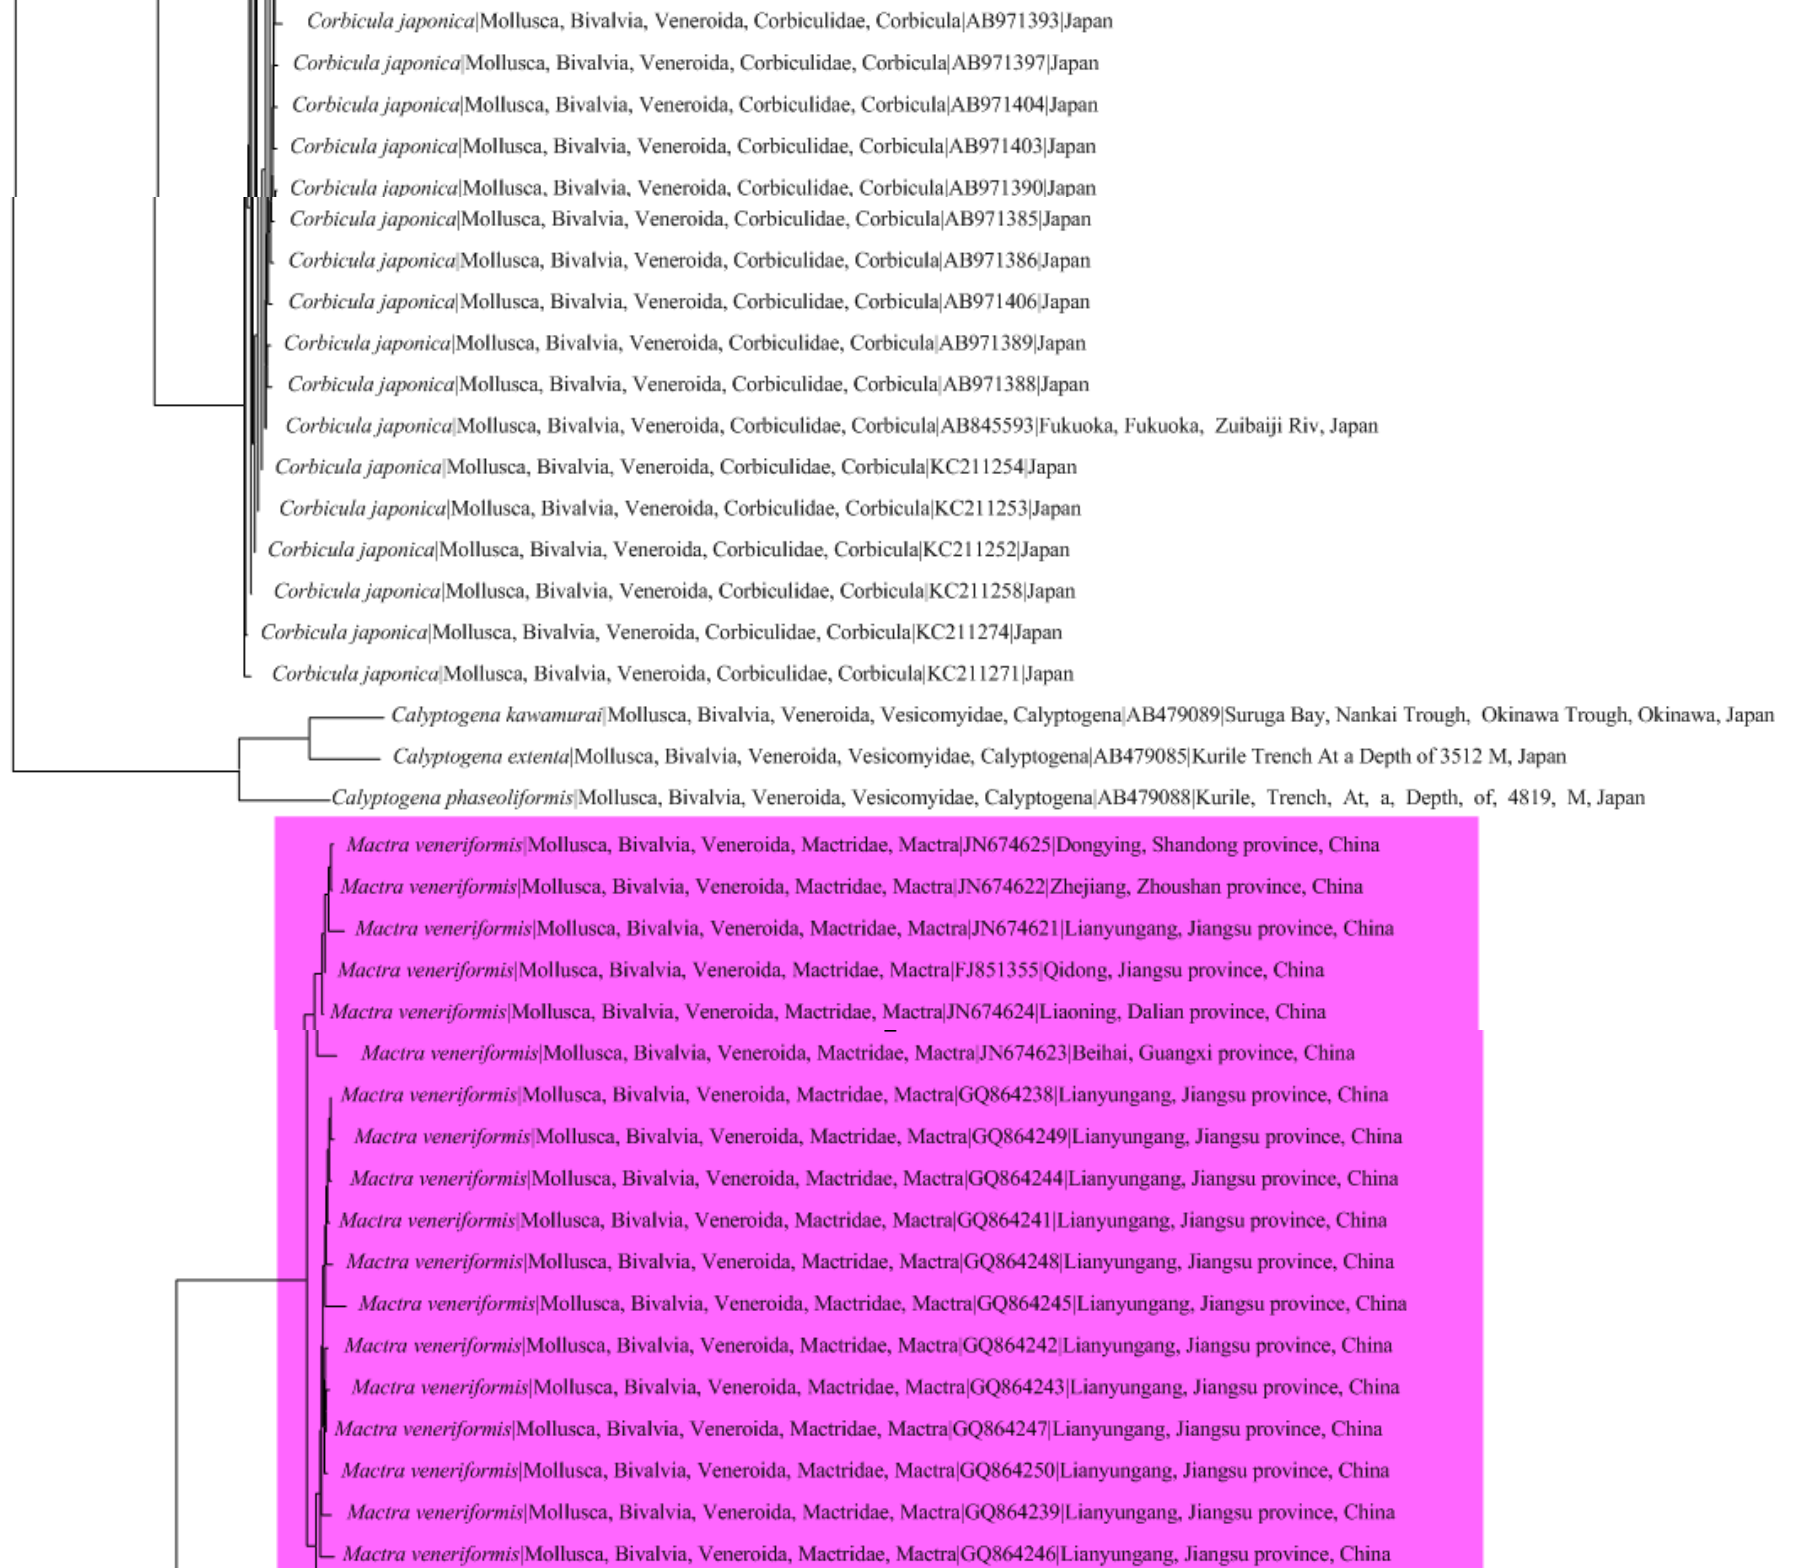

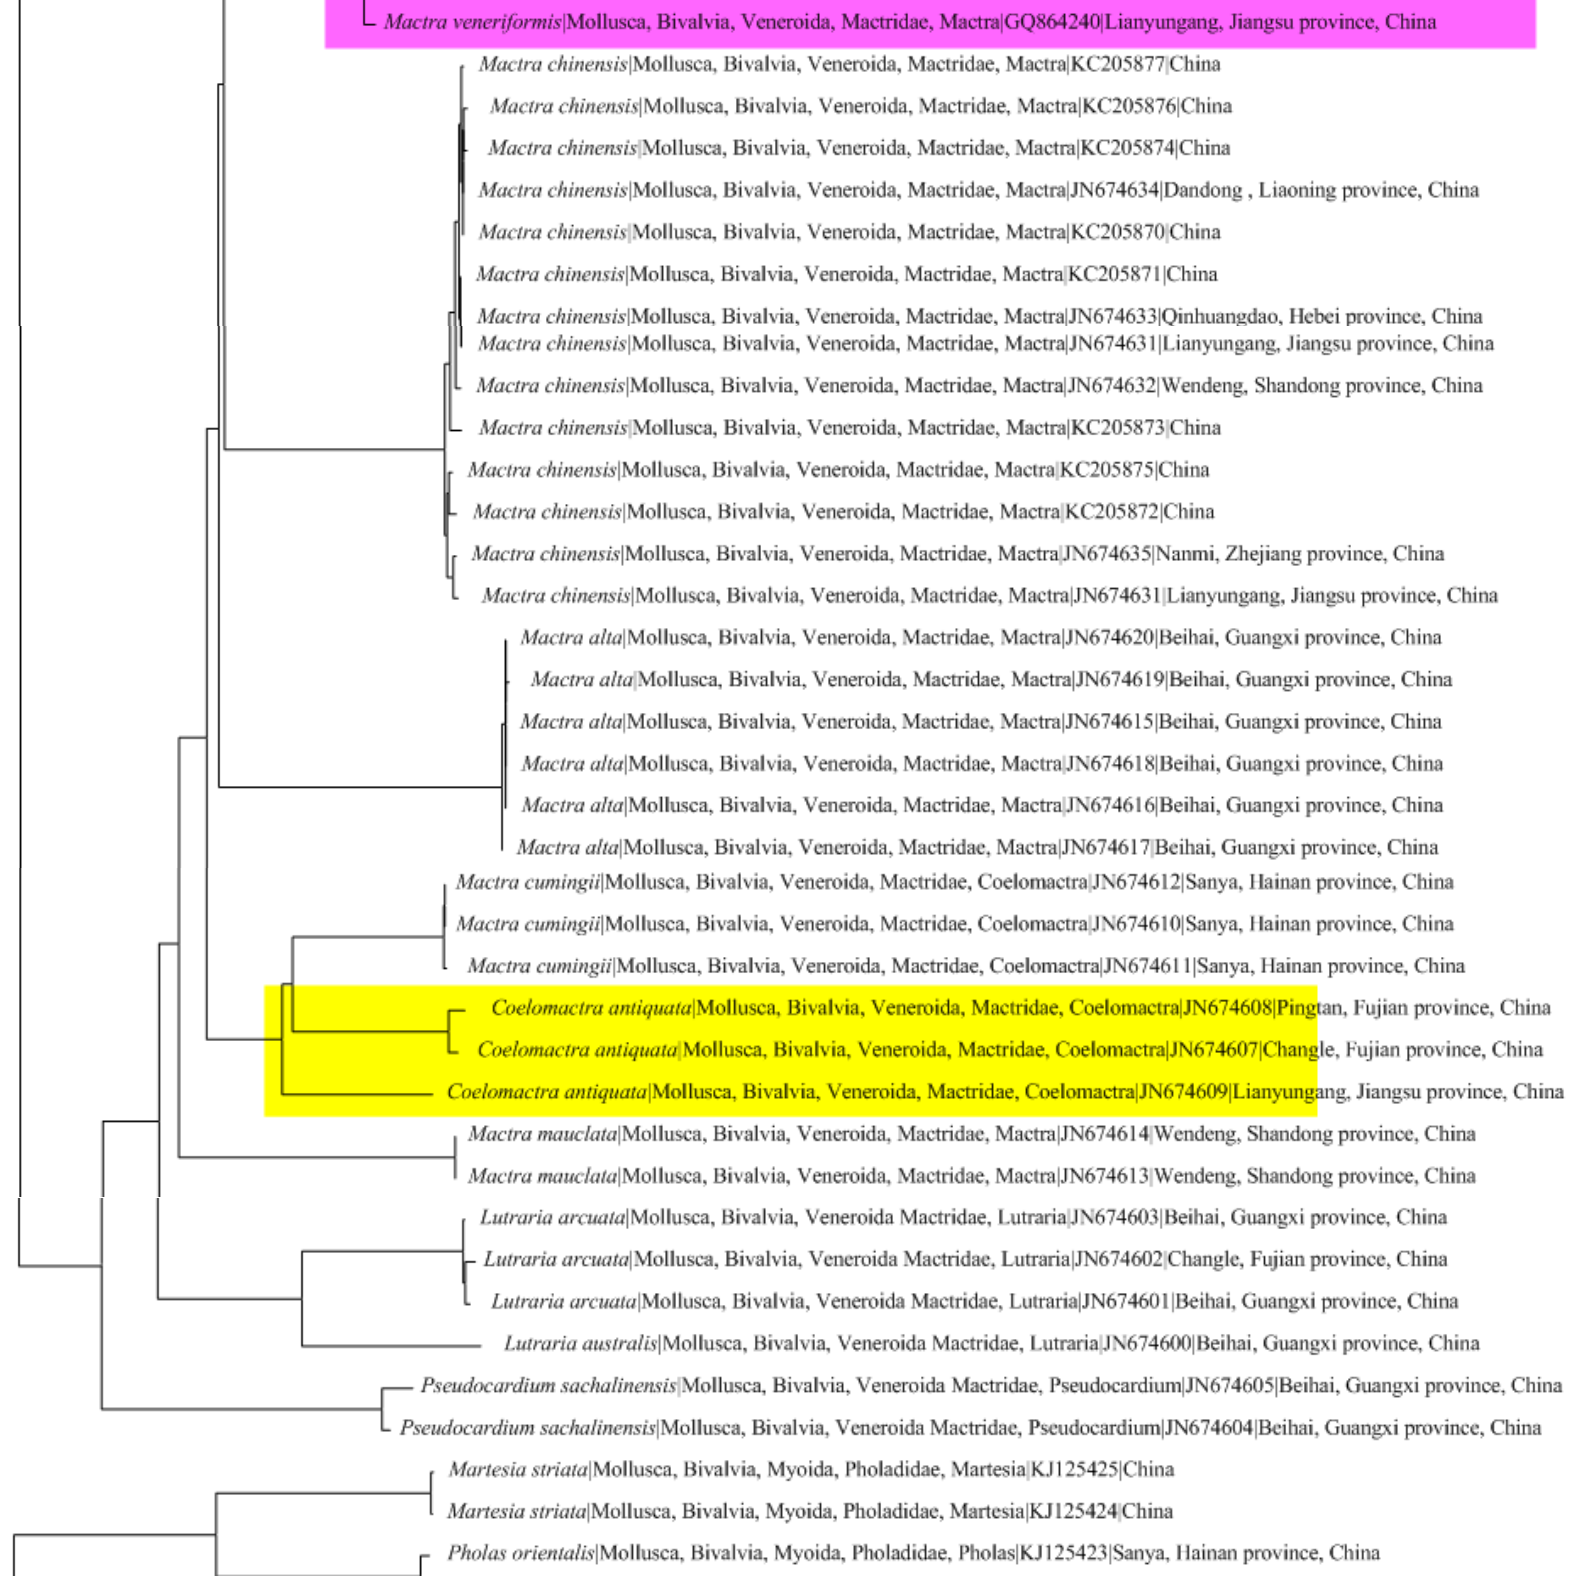



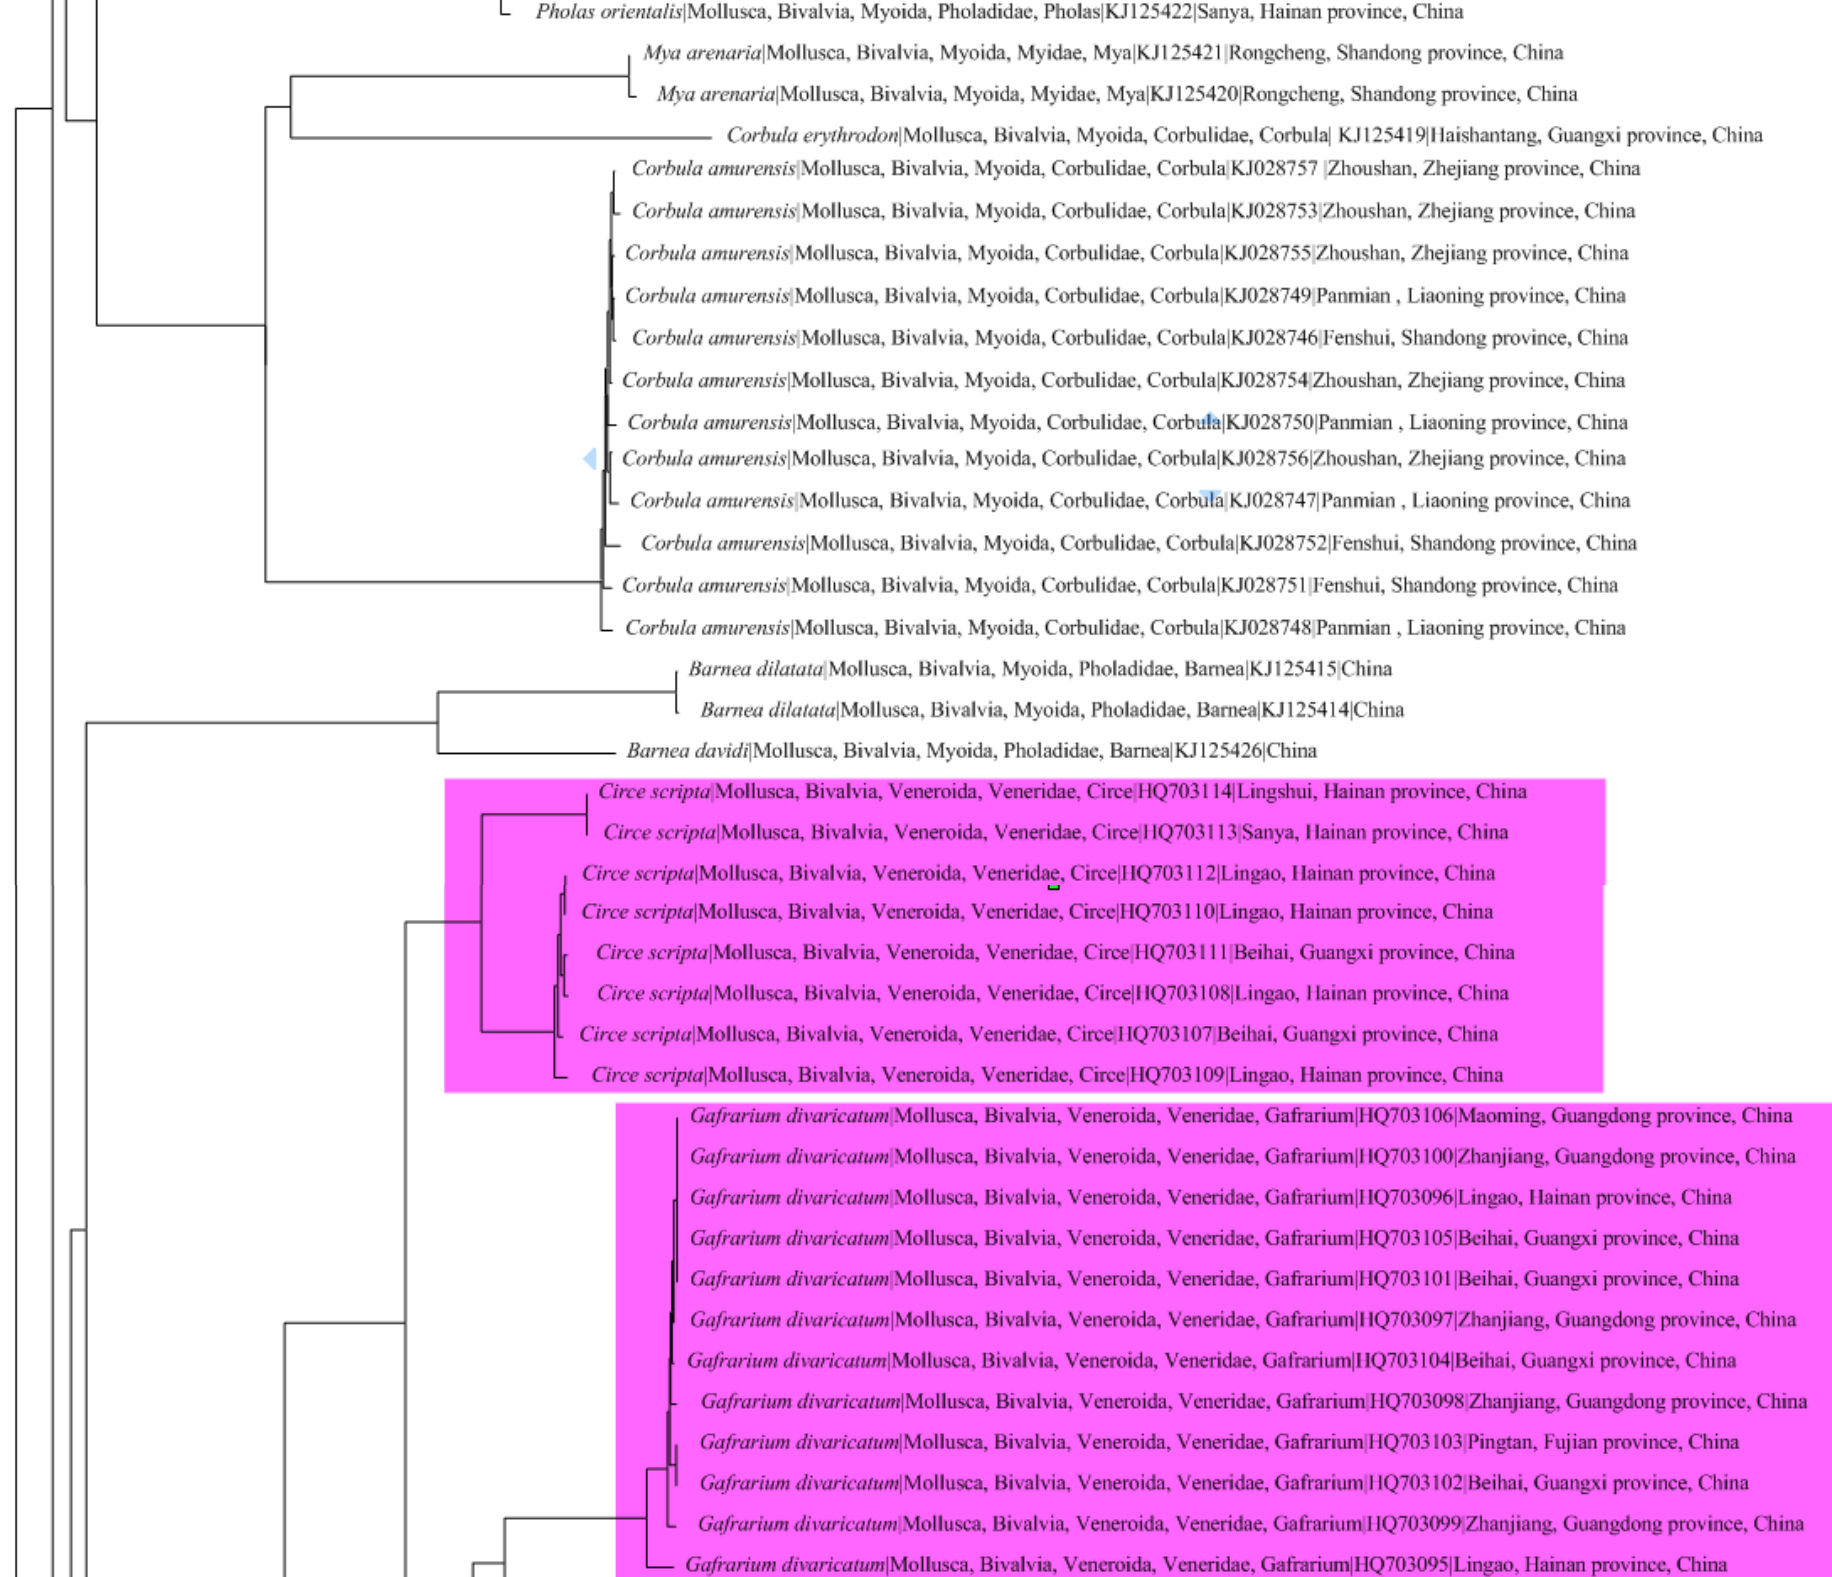

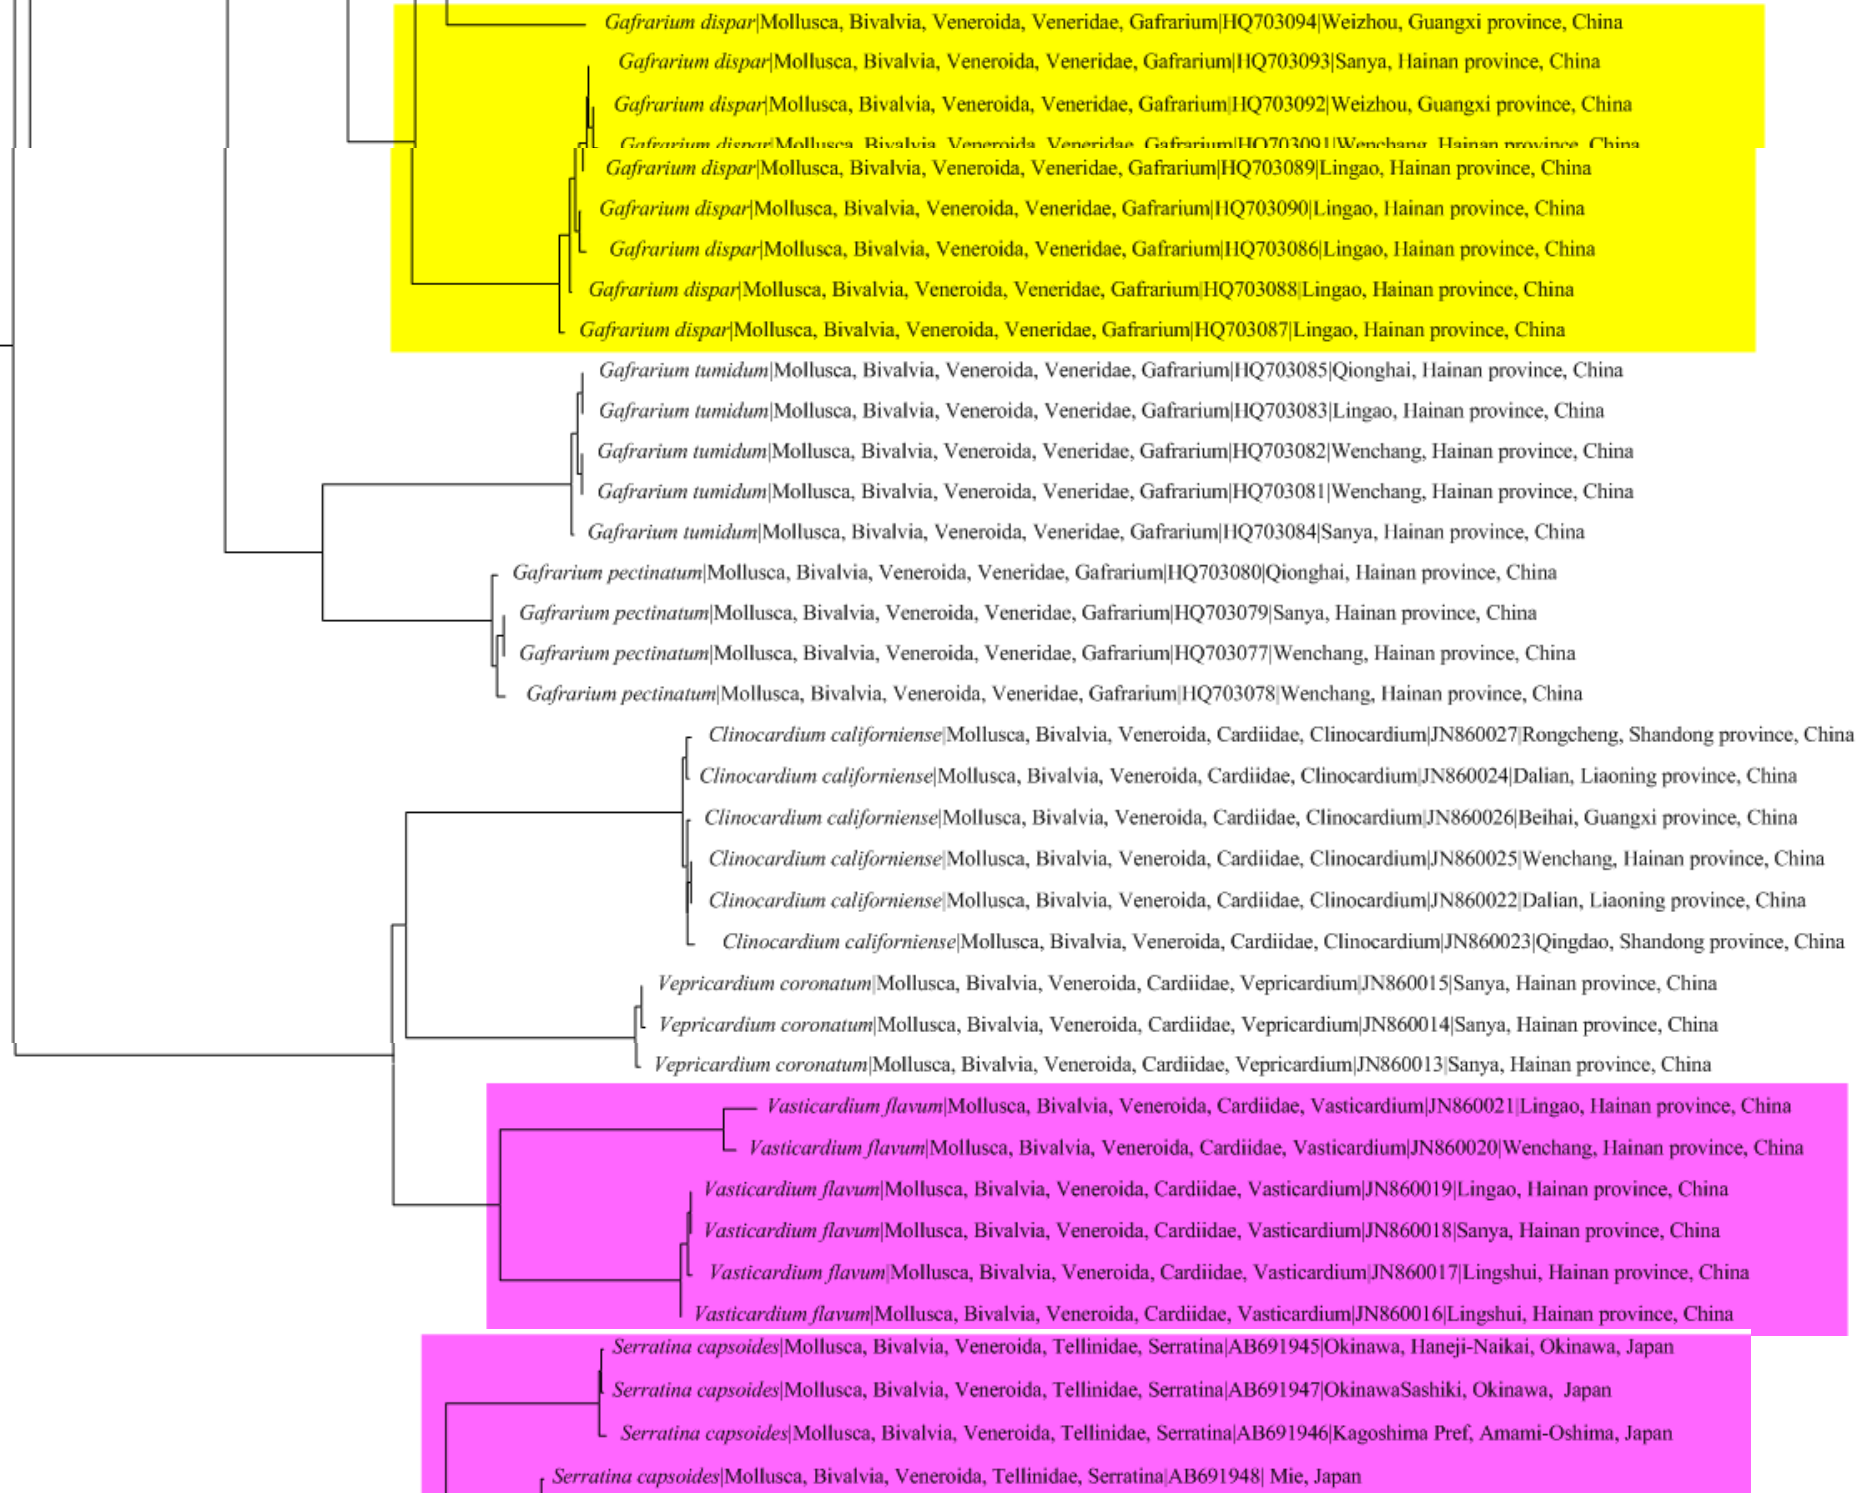

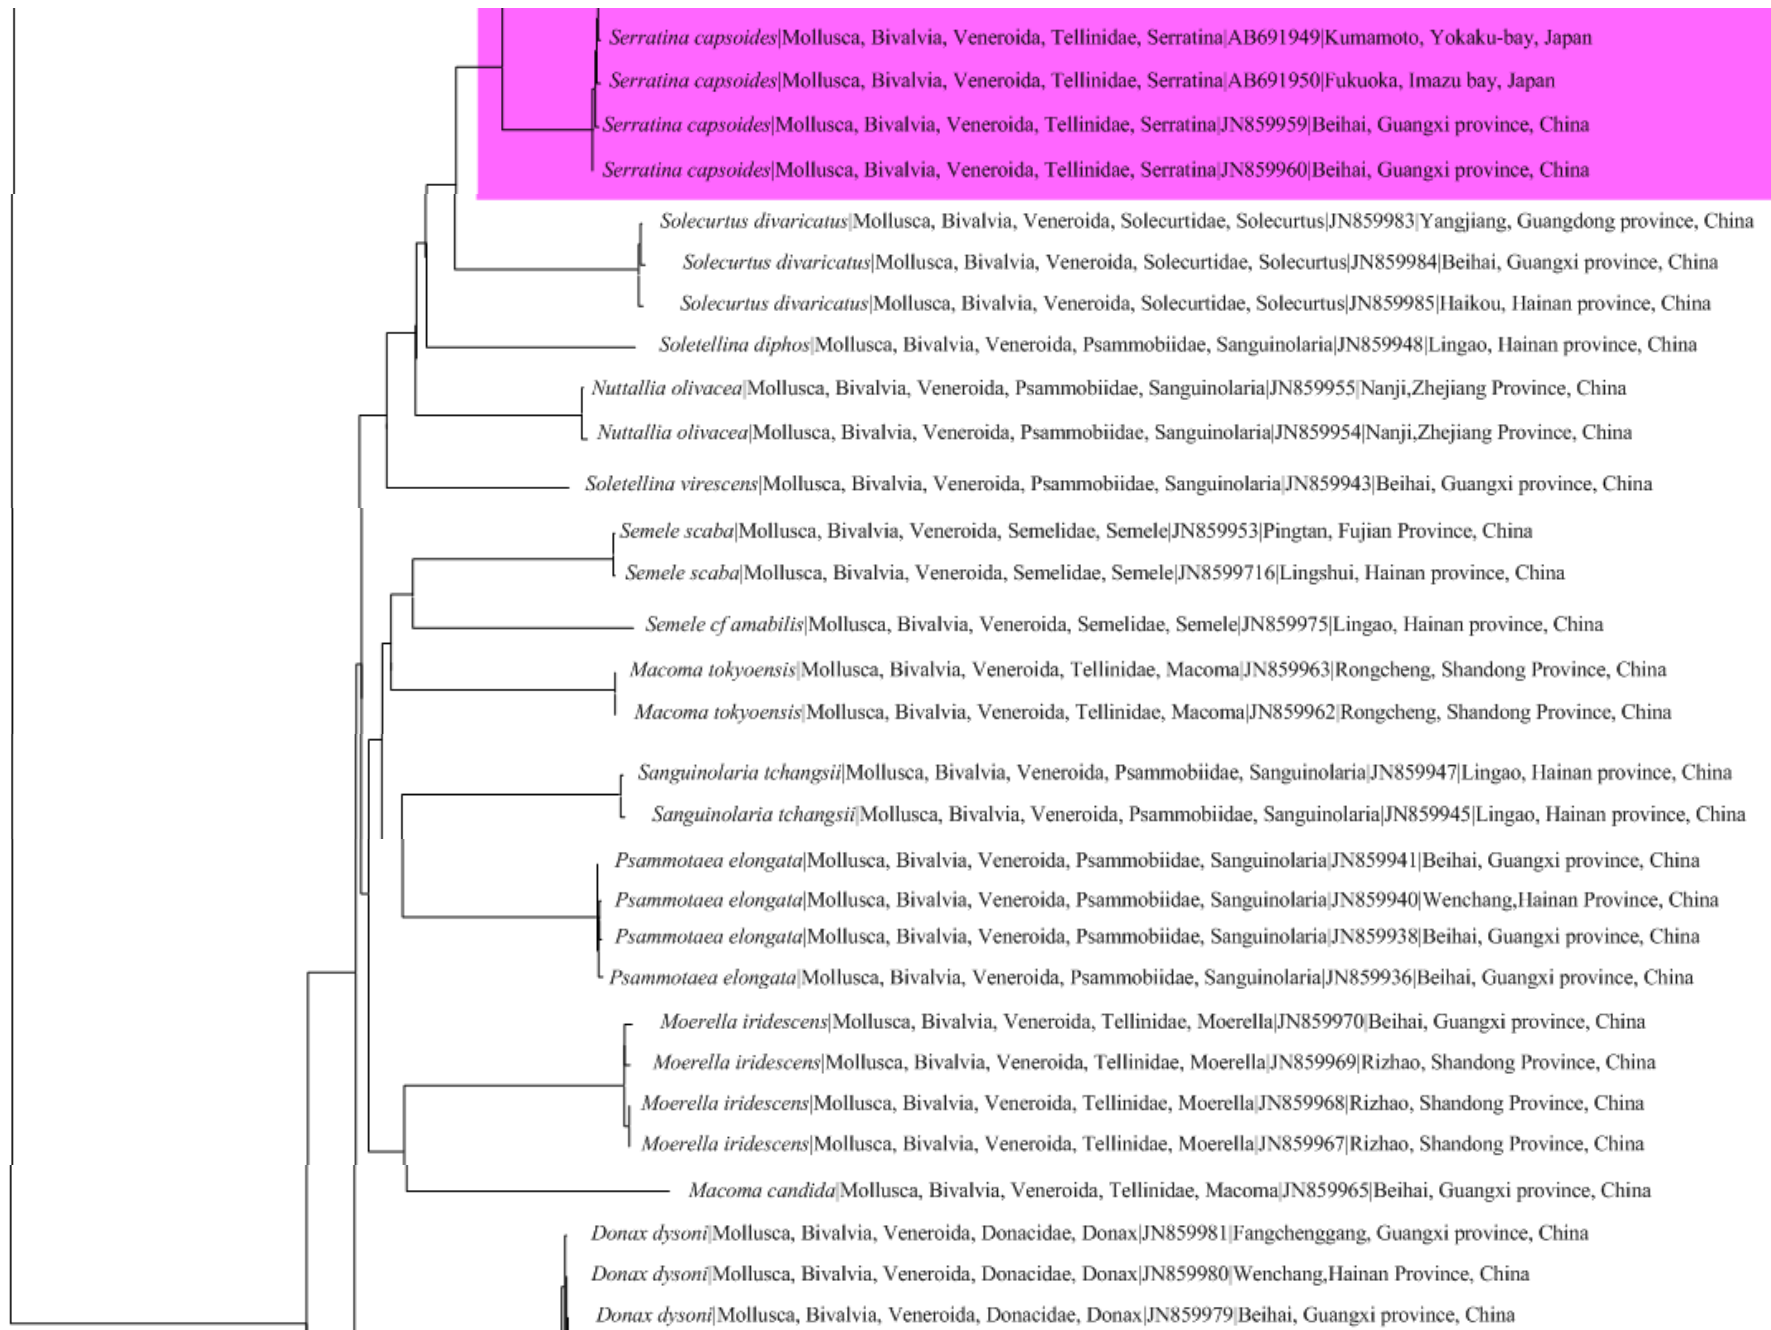

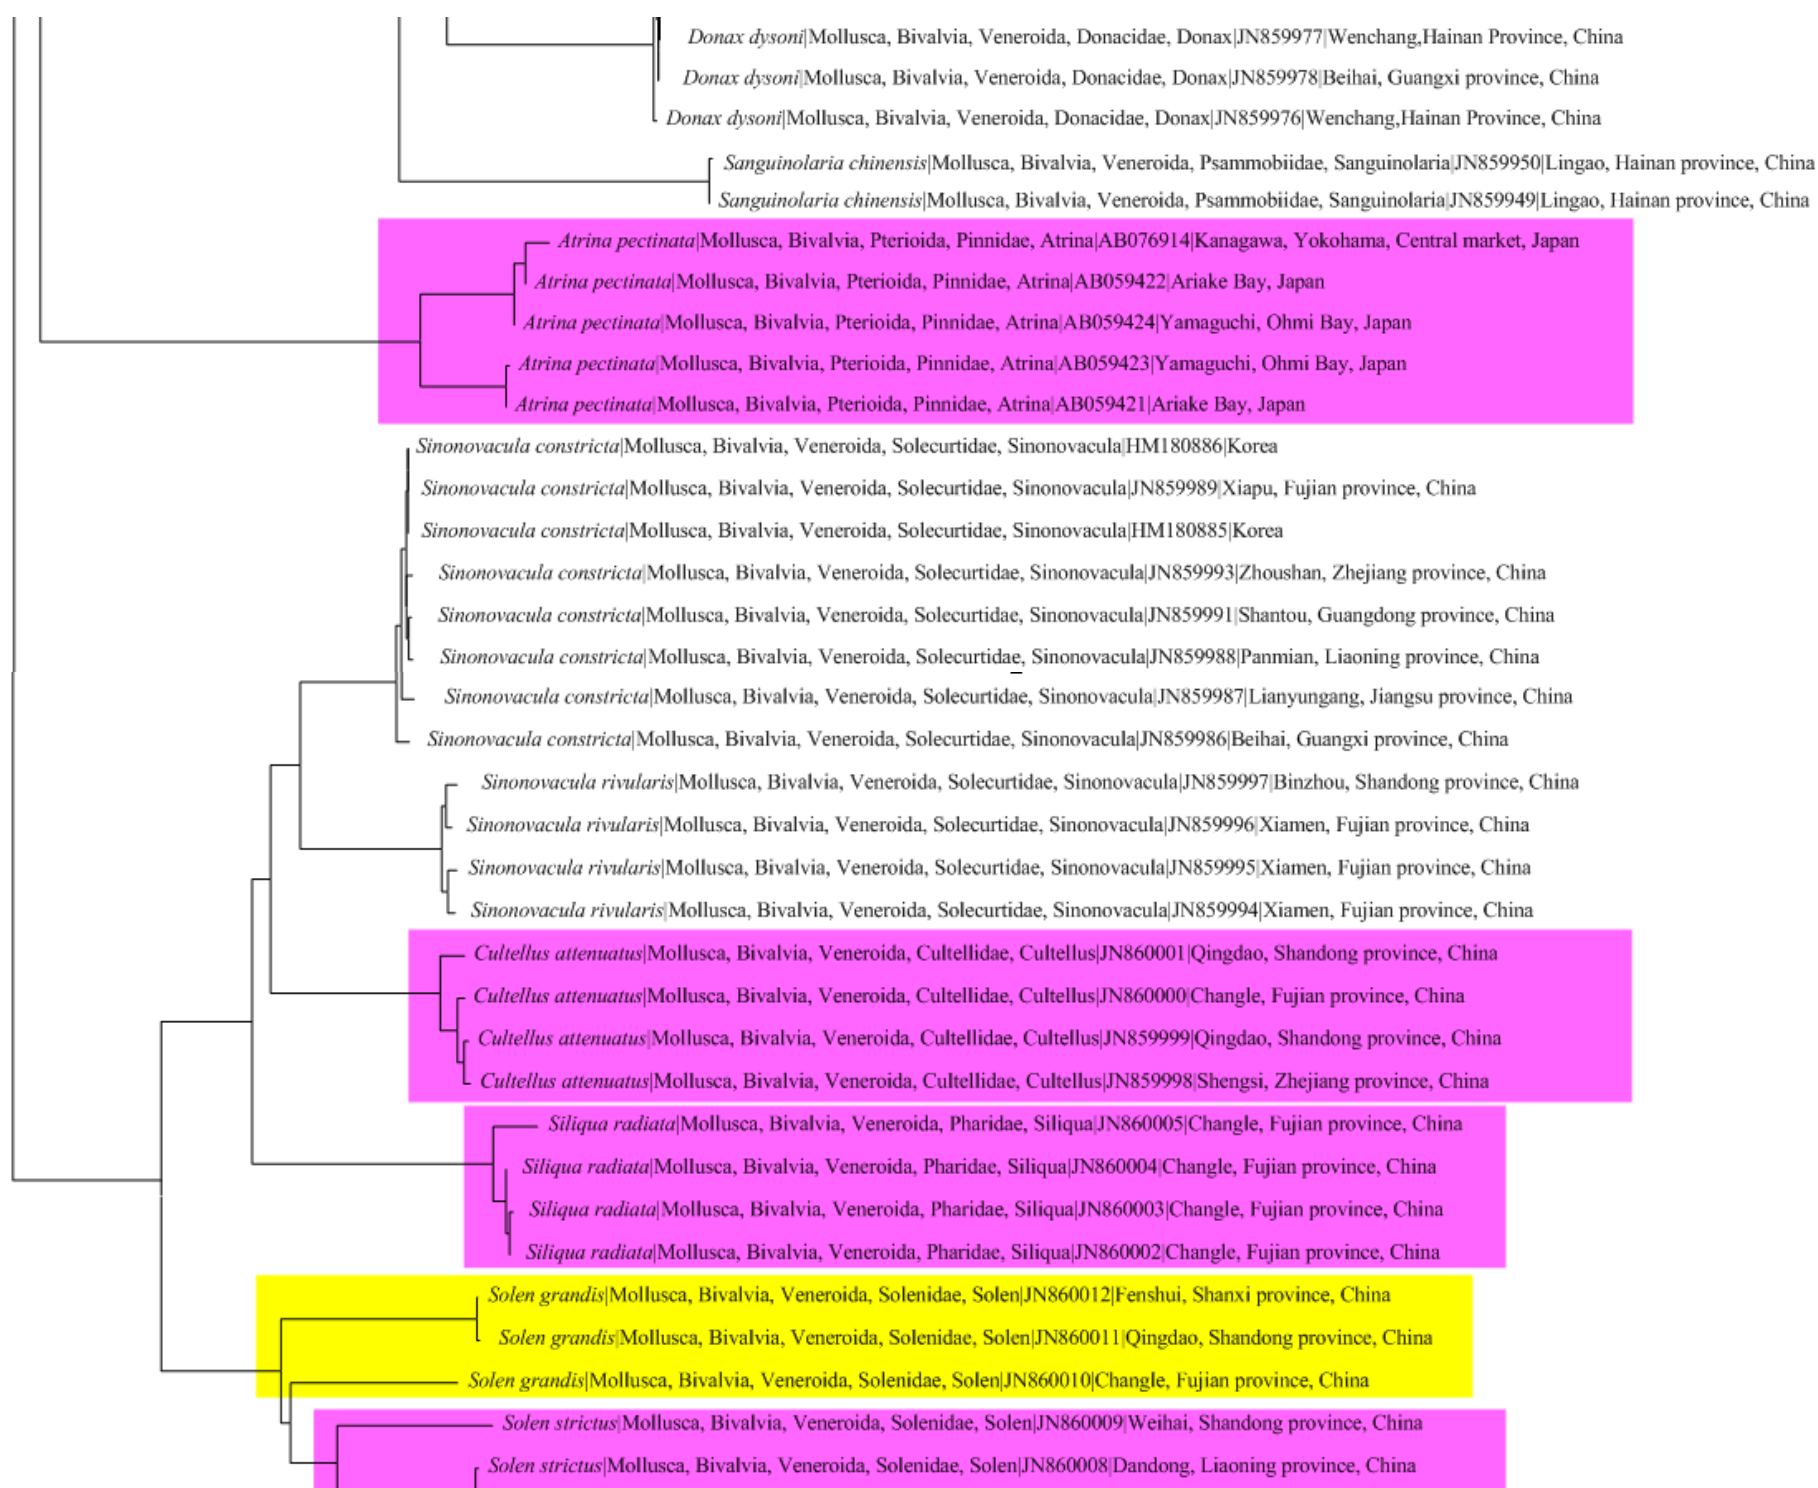

*Solen strictus*|Mollusca, Bivalvia, Veneroidea, Solenidae, Solen|JN860007|Beihai, Guangxi province, China

*Solen strictus*|Mollusca, Bivalvia, Veneroidea, Solenidae, Solen|JN860006|Fangchenggang, Guangxi province, China

*Cellana toreuma*|Mollusca, Gastropoda, Patellogastropoda, Nacellidae, Cellana|AB238564|AkitaOga, Japan

*Cellana toreuma*|Mollusca, Gastropoda, Patellogastropoda, Nacellidae, Cellana|KM221163|Rongcheng, Shandong province, China

*Cellana toreuma*|Mollusca, Gastropoda, Patellogastropoda, Nacellidae, Cellana|KM221055|Shengsi, Zhejiang province, China

*Cellana toreuma*|Mollusca, Gastropoda, Patellogastropoda, Nacellidae, Cellana|KM221053|Zhoushan, Zhejiang province, China

*Cellana toreuma*|Mollusca, Gastropoda, Patellogastropoda, Nacellidae, Cellana|KM221057|Nanmi, Zhejiang province, China

*Cellana toreuma*|Mollusca, Gastropoda, Patellogastropoda, Nacellidae, Cellana|KM221078|Pingtan, Fujian province, China

*Cellana toreuma*|Mollusca, Gastropoda, Patellogastropoda, Nacellidae, Cellana|KM221079|Pingtan, Fujian province, China

*Cellana toreuma*|Mollusca, Gastropoda, Patellogastropoda, Nacellidae, Cellana|KM221066|Sanya, Hainan province, China

*Cellana toreuma*|Mollusca, Gastropoda, Patellogastropoda, Nacellidae, Cellana|AB445030|Kagawa, Japan

*Cellana toreuma*|Mollusca, Gastropoda, Patellogastropoda, Nacellidae, Cellana|AB445028|Aomori, Tappizaki, Japan

*Cellana toreuma*|Mollusca, Gastropoda, Patellogastropoda, Nacellidae, Cellana|AB445027|Miyagi Ayukawa, Japan

*Cellana toreuma*|Mollusca, Gastropoda, Patellogastropoda, Nacellidae, Cellana|AB445026|Kanagawa, Hayama, Japan

*Cellana toreuma*|Mollusca, Gastropoda, Patellogastropoda, Nacellidae, Cellana|AB445025|Mie, Japan

*Cellana toreuma*|Mollusca, Gastropoda, Patellogastropoda, Nacellidae, Cellana|AB445024|Aich, Morozaki, Japan

*Cellana toreuma*|Mollusca, Gastropoda, Patellogastropoda, Nacellidae, Cellana|AB445020|Fukui, Japan

*Cellana toreuma*|Mollusca, Gastropoda, Patellogastropoda, Nacellidae, Cellana|AB445019|IwateYamada, Japan

*Cellana toreuma*|Mollusca, Gastropoda, Patellogastropoda, Nacellidae, Cellana|AB445031|Wakayama, Japan

*Cellana toreuma*|Mollusca, Gastropoda, Patellogastropoda, Nacellidae, Cellana|AB445029| Miyazaki, Takanabe, Japan

*Cellana toreuma*|Mollusca, Gastropoda, Patellogastropoda, Nacellidae, Cellana|AB445032|Kumamoto, Reihoku, Japan

*Cellana toreuma*|Mollusca, Gastropoda, Patellogastropoda, Nacellidae, Cellana|KM221162|Sanya, Hainan province, China

*Cellana toreuma*|Mollusca, Gastropoda, Patellogastropoda, Nacellidae, Cellana|GQ455984|Japan

*Cellana toreuma*|Mollusca, Gastropoda, Patellogastropoda, Nacellidae, Cellana|KM221118|Qingdao, Shandong province, China

*Cellana toreuma*|Mollusca, Gastropoda, Patellogastropoda, Nacellidae, Cellana|GQ455985|Japan

*Notoacmea schrenckii*|Mollusca, Gastropoda, Patellogastropoda, Acmaeidae, Notoacmea|HM180721|Korea

*Notoacmea schrenckii*|Mollusca, Gastropoda, Patellogastropoda, Acmaeidae, Notoacmea|HM180723|Korea

*Notoacmea schrenckii*|Mollusca, Gastropoda, Patellogastropoda, Acmaeidae, Notoacmea|HM180722|Korea

*Notoacmea schrenckii*|Mollusca, Gastropoda, Patellogastropoda, Acmaeidae, Notoacmea|HM180724|Korea

*Notoacmea schrenckii*|Mollusca, Gastropoda, Patellogastropoda, Acmaeidae, Notoacmea|HM180720|Korea

*Notoacmea schrenckii*|Mollusca, Gastropoda, Patellogastropoda, Acmaeidae, Notoacmea|HM180719|Korea

*Cellana radiata enneagona*|Mollusca, Gastropoda, Docoglossa, Nacellidae, Cellana|GQ455965|Ogasawara, Japan

*Cellana radiata enneagona*|Mollusca, Gastropoda, Docoglossa, Nacellidae, Cellana|GQ455964|Ogasawara, Japan

*Cellana radiata*|Mollusca, Gastropoda, Docoglossa, Nacellidae, Cellana|AB433646|Tokyo, Minami Iwojima, Japan

*Cellana radiata*|Mollusca, Gastropoda, Docoglossa, Nacellidae, Cellana|AB433645|Tokyo, Ogasawara Islands, Chichijima Sakaiura, Japan

*Cellana radiata*|Mollusca, Gastropoda, Docoglossa, Nacellidae, Cellana|AB263731|Ogasawara Islands, Chichijima, John Beach, Japan

*Cellana radiata*|Mollusca, Gastropoda, Docoglossa, Nacellidae, Cellana|AB263730|Ogasawara Islands, Chichijima, John Beach, Japan

*Cellana radiata*|Mollusca, Gastropoda, Docoglossa, Nacellidae, Cellana|AB263729|Ogasawara, Islands, Chichijima, Miyanojima, Japan

*Cellana radiata*|Mollusca, Gastropoda, Docoglossa, Nacellidae, Cellana|AB263726|Ogasawara, Islands, Chichijima, Sakaiura, Japan

*Cellana radiata*|Mollusca, Gastropoda, Docoglossa, Nacellidae, Cellana|AB263725|Ogasawara, Islands, Chichijima, Sakaiura, Japan  
*Cellana radiata*|Mollusca, Gastropoda, Docoglossa, Nacellidae, Cellana|AB263727|Ogasawara, Islands, Chichijima, Sakaiura, Japan  
*Cellana radiata*|Mollusca, Gastropoda, Docoglossa, Nacellidae, Cellana|AB263728|Ogasawara, Islands, Chichijima, Miyanohama, Japan  
*Cellana radiata*|Mollusca, Gastropoda, Docoglossa, Nacellidae, Cellana|AB433644|Tokyo, Ogasawara Islands, Chichijima Sakaiura, Japan  
*Cellana radiata*|Mollusca, Gastropoda, Docoglossa, Nacellidae, Cellana|AB263724|Ogasawara, Islands, Chichijima, Sakaiura, Japan

*Cellana testudinaria*|Mollusca, Gastropoda, Docoglossa, Nacellidae, Cellana|AB238563|Okinawa, Okinawa, Japan

*Cellana grata*|Mollusca, Gastropoda, Patellogastropoda, Nacellidae, Cellana|AB238546|Mie, Japan

*Cellana grata*|Mollusca, Gastropoda, Patellogastropoda, Nacellidae, Cellana|GQ455949|Japan

*Cellana grata*|Mollusca, Gastropoda, Patellogastropoda, Nacellidae, Cellana|GQ455948|Japan

*Cellana grata*|Mollusca, Gastropoda, Patellogastropoda, Nacellidae, Cellana|GQ455950|Japan

*Cellana grata*|Mollusca, Gastropoda, Patellogastropoda, Nacellidae, Cellana|GQ455946|HongKong, China

*Cellana grata*|Mollusca, Gastropoda, Patellogastropoda, Nacellidae, Cellana|GQ455945|HongKong, China

*Cellana grata*|Mollusca, Gastropoda, Patellogastropoda, Nacellidae, Cellana|KM221155|Xiapu, Fujian province, China

*Cellana grata*|Mollusca, Gastropoda, Patellogastropoda, Nacellidae, Cellana|KM221067|Xiapu, Fujian province, China

*Cellana grata*|Mollusca, Gastropoda, Patellogastropoda, Nacellidae, Cellana|KM221095|Nanmi, Fujian province, China

*Cellana grata*|Mollusca, Gastropoda, Patellogastropoda, Nacellidae, Cellana|KM221105|Nanmi, Fujian province, China

*Cellana grata*|Mollusca, Gastropoda, Patellogastropoda, Nacellidae, Cellana|KM221156|Xiapu, Fujian province, China

*Cellana grata*|Mollusca, Gastropoda, Patellogastropoda, Nacellidae, Cellana|KM221072|Xiapu, Fujian province, China

*Cellana mazatlandica*|Mollusca, Gastropoda, Patellogastropoda, Nacellidae, Cellana|AB433642|Tokyo, Ogasawara Islands, Chichijima, Japan,

*Cellana mazatlandica*|Mollusca, Gastropoda, Patellogastropoda, Nacellidae, Cellana|AB433641|Tokyo, Ogasawara Islands, Minamijima, Japan

*Cellana mazatlandica*|Mollusca, Gastropoda, Patellogastropoda, Nacellidae, Cellana|AB433640|Tokyo, Ogasawara Islands, Chichijima, Japan,

*Cellana mazatlandica*|Mollusca, Gastropoda, Patellogastropoda, Nacellidae, Cellana|AB433639|Tokyo, Ogasawara Islands, Mukojima, Japan

*Cellana mazatlandica*|Mollusca, Gastropoda, Patellogastropoda, Nacellidae, Cellana|AB433638|Tokyo, Ogasawara Islands, Hahajima, Japan

*Cellana mazatlandica*|Mollusca, Gastropoda, Patellogastropoda, Nacellidae, Cellana|AB433637|Tokyo, Ogasawara Islands, Hahajima, Japan

*Cellana mazatlandica*|Mollusca, Gastropoda, Patellogastropoda, Nacellidae, Cellana|AB433636|Tokyo, Ogasawara Islands, Hahajima, Japan

*Cellana mazatlandica*|Mollusca, Gastropoda, Patellogastropoda, Nacellidae, Cellana|AB433635|Tokyo, Ogasawara Islands, Anejima, Japan

*Cellana mazatlandica*|Mollusca, Gastropoda, Patellogastropoda, Nacellidae, Cellana|GQ455955|Ogasawara, Japan

*Cellana mazatlandica*|Mollusca, Gastropoda, Patellogastropoda, Nacellidae, Cellana|GQ455953|Ogasawara, Japan

*Cellana mazatlandica*|Mollusca, Gastropoda, Patellogastropoda, Nacellidae, Cellana|GQ455954|Ogasawara, Japan

*Cellana mazatlandica*|Mollusca, Gastropoda, Patellogastropoda, Nacellidae, Cellana|GQ455952|Ogasawara, Japan

*Cellana mazatlandica*|Mollusca, Gastropoda, Patellogastropoda, Nacellidae, Cellana|GQ455951|Ogasawara, Japan

*Cellana nigrolineata*|Mollusca, Gastropoda, Patellogastropoda, Nacellidae, Cellana|AB238548|Mie, Japan

*Cellana nigrolineata*|Mollusca, Gastropoda, Patellogastropoda, Nacellidae, Cellana|AB548155|Yamaguchi, Hikari, Japan

*Cellana nigrolineata*|Mollusca, Gastropoda, Patellogastropoda, Nacellidae, Cellana|AB548154|Yamaguchi, Hikari, Japan

*Cellana nigrolineata*|Mollusca, Gastropoda, Patellogastropoda, Nacellidae, Cellana|AB548158|Wakayama, Japan

*Cellana nigrolineata*|Mollusca, Gastropoda, Patellogastropoda, Nacellidae, Cellana|AB548157|Wakayama, Japan

*Cellana nigrolineata*|Mollusca, Gastropoda, Patellogastropoda, Nacellidae, Cellana|AB548173|Shizuoka, Japan

*Cellana nigrolineata*|Mollusca, Gastropoda, Patellogastropoda, Nacellidae, Cellana|AB548172|Shizuoka, Japan  
*Cellana nigrolineata*|Mollusca, Gastropoda, Patellogastropoda, Nacellidae, Cellana|AB548161|Shizuoka, Japan  
*Cellana nigrolineata*|Mollusca, Gastropoda, Patellogastropoda, Nacellidae, Cellana|AB548189|Oita, Japan  
*Cellana nigrolineata*|Mollusca, Gastropoda, Patellogastropoda, Nacellidae, Cellana|AB548188|Oita, Japan  
*Cellana nigrolineata*|Mollusca, Gastropoda, Patellogastropoda, Nacellidae, Cellana|AB548187|Oita, Japan  
*Cellana nigrolineata*|Mollusca, Gastropoda, Patellogastropoda, Nacellidae, Cellana|AB548175|Miyagi Ayukawa, Japan  
*Cellana nigrolineata*|Mollusca, Gastropoda, Patellogastropoda, Nacellidae, Cellana|AB548174|Miyagi Ayukawa, Japan  
*Cellana nigrolineata*|Mollusca, Gastropoda, Patellogastropoda, Nacellidae, Cellana|AB548169|Kanagawa, Hayama, Japan  
*Cellana nigrolineata*|Mollusca, Gastropoda, Patellogastropoda, Nacellidae, Cellana|AB548168|Kanagawa, Hayama, Japan  
*Cellana nigrolineata*|Mollusca, Gastropoda, Patellogastropoda, Nacellidae, Cellana|AB548162|Kagawa, Japan  
*Cellana nigrolineata*|Mollusca, Gastropoda, Patellogastropoda, Nacellidae, Cellana|AB548182|Ehime, Hirauro, Japan  
*Cellana nigrolineata*|Mollusca, Gastropoda, Patellogastropoda, Nacellidae, Cellana|AB548181|Ehime, Hirauro, Japan  
*Cellana nigrolineata*|Mollusca, Gastropoda, Patellogastropoda, Nacellidae, Cellana|AB548164|Shizuoka, Japan  
*Cellana nigrolineata*|Mollusca, Gastropoda, Patellogastropoda, Nacellidae, Cellana|AB548163|Wakayama, Japan  
*Cellana nigrolineata*|Mollusca, Gastropoda, Patellogastropoda, Nacellidae, Cellana|AB548186|Shizuoka, Japan  
*Cellana nigrolineata*|Mollusca, Gastropoda, Patellogastropoda, Nacellidae, Cellana|AB548178|Kochi Hanemisaki, Japan  
*Cellana nigrolineata*|Mollusca, Gastropoda, Patellogastropoda, Nacellidae, Cellana|AB548166|Hyogo Yura, Japan  
*Cellana nigrolineata*|Mollusca, Gastropoda, Patellogastropoda, Nacellidae, Cellana|AB548177|Chiba, Japan  
*Cellana nigrolineata*|Mollusca, Gastropoda, Patellogastropoda, Nacellidae, Cellana|AB548176|Chiba, Japan  
*Cellana nigrolineata*|Mollusca, Gastropoda, Patellogastropoda, Nacellidae, Cellana|AB548167|Hyogo Yura, Japan  
*Cellana nigrolineata*|Mollusca, Gastropoda, Patellogastropoda, Nacellidae, Cellana|GQ455956|Japan  
*Cellana nigrolineata*|Mollusca, Gastropoda, Patellogastropoda, Nacellidae, Cellana|AB548212|Nagasaki, Mie, Japan  
*Cellana nigrolineata*|Mollusca, Gastropoda, Patellogastropoda, Nacellidae, Cellana|AB548211|Nagasaki, Mie, Japan  
*Cellana nigrolineata*|Mollusca, Gastropoda, Patellogastropoda, Nacellidae, Cellana|AB548180|Miyazaki, Shirahama, Japan  
*Cellana nigrolineata*|Mollusca, Gastropoda, Patellogastropoda, Nacellidae, Cellana|AB548179|Miyazaki, Shirahama, Japan  
*Cellana nigrolineata*|Mollusca, Gastropoda, Patellogastropoda, Nacellidae, Cellana|AB548184|Kagoshima, Japan  
*Cellana nigrolineata*|Mollusca, Gastropoda, Patellogastropoda, Nacellidae, Cellana|AB548183|Kagoshima, Japan  
*Cellana nigrolineata*|Mollusca, Gastropoda, Patellogastropoda, Nacellidae, Cellana|AB548185|Kagoshima, Japan  
*Cellana nigrolineata*|Mollusca, Gastropoda, Patellogastropoda, Nacellidae, Cellana|AB548165|Fukuoka Iazu, Japan  
*Cellana nigrolineata*|Mollusca, Gastropoda, Patellogastropoda, Nacellidae, Cellana|AB548199|Kagoshima, Japan  
*Cellana nigrolineata*|Mollusca, Gastropoda, Patellogastropoda, Nacellidae, Cellana|AB548200|Kagoshima, Japan  
*Cellana nigrolineata*|Mollusca, Gastropoda, Patellogastropoda, Nacellidae, Cellana|AB548196|Kagoshima, Japan  
*Cellana nigrolineata*|Mollusca, Gastropoda, Patellogastropoda, Nacellidae, Cellana|AB548197|Kagoshima, Japan  
*Cellana nigrolineata*|Mollusca, Gastropoda, Patellogastropoda, Nacellidae, Cellana|AB548206|Kagoshima, Japan  
*Cellana nigrolineata*|Mollusca, Gastropoda, Patellogastropoda, Nacellidae, Cellana|AB548207|Kagoshima, Japan  
*Cellana nigrolineata*|Mollusca, Gastropoda, Patellogastropoda, Nacellidae, Cellana|AB548208|Kagoshima, Japan

*Cellana nigrolineata*|Mollusca, Gastropoda, Patellogastropoda, Nacellidae, Cellana|AB548209|Kagoshima, Japan  
*Cellana nigrolineata*|Mollusca, Gastropoda, Patellogastropoda, Nacellidae, Cellana|AB548210|Kagoshima, Japan  
*Cellana nigrolineata*|Mollusca, Gastropoda, Patellogastropoda, Nacellidae, Cellana|AB548201|Kagoshima, Japan  
*Cellana nigrolineata*|Mollusca, Gastropoda, Patellogastropoda, Nacellidae, Cellana|AB548202|Kagoshima, Japan  
*Cellana nigrolineata*|Mollusca, Gastropoda, Patellogastropoda, Nacellidae, Cellana|AB548203|Kagoshima, Japan  
*Cellana nigrolineata*|Mollusca, Gastropoda, Patellogastropoda, Nacellidae, Cellana|AB548204|Kagoshima, Japan  
*Cellana nigrolineata*|Mollusca, Gastropoda, Patellogastropoda, Nacellidae, Cellana|AB548205|Kagoshima, Japan  
*Cellana nigrolineata*|Mollusca, Gastropoda, Patellogastropoda, Nacellidae, Cellana|AB548192|Kagoshima, Japan  
*Cellana nigrolineata*|Mollusca, Gastropoda, Patellogastropoda, Nacellidae, Cellana|AB548193|Kagoshima, Japan  
*Cellana nigrolineata*|Mollusca, Gastropoda, Patellogastropoda, Nacellidae, Cellana|AB548194|Kagoshima, Japan  
*Cellana nigrolineata*|Mollusca, Gastropoda, Patellogastropoda, Nacellidae, Cellana|AB548195|Kagoshima, Japan  
*Cellana nigrolineata*|Mollusca, Gastropoda, Patellogastropoda, Nacellidae, Cellana|AB548198|Kagoshima, Japan  
*Cellana nigrolineata*|Mollusca, Gastropoda, Patellogastropoda, Nacellidae, Cellana|AB548156|Kagoshima, Japan  
*Cellana nigrolineata*|Mollusca, Gastropoda, Patellogastropoda, Nacellidae, Cellana|AB548190|Kagoshima, Japan  
*Cellana nigrolineata*|Mollusca, Gastropoda, Patellogastropoda, Nacellidae, Cellana|AB548191|Kagoshima, Japan  
*Cellana nigrolineata*|Mollusca, Gastropoda, Patellogastropoda, Nacellidae, Cellana|AB548170|Kumamoto, KarakizakiJ, apan  
*Cellana nigrolineata*|Mollusca, Gastropoda, Patellogastropoda, Nacellidae, Cellana|AB548171|Kumamoto, KarakizakiJ, apan  
*Cellana nigrolineata*|Mollusca, Gastropoda, Patellogastropoda, Nacellidae, Cellana|AB548160|Kumamoto, Reihoku, Japan  
*Cellana nigrolineata*|Mollusca, Gastropoda, Patellogastropoda, Nacellidae, Cellana|AB548159|Kumamoto, Reihoku, Japan

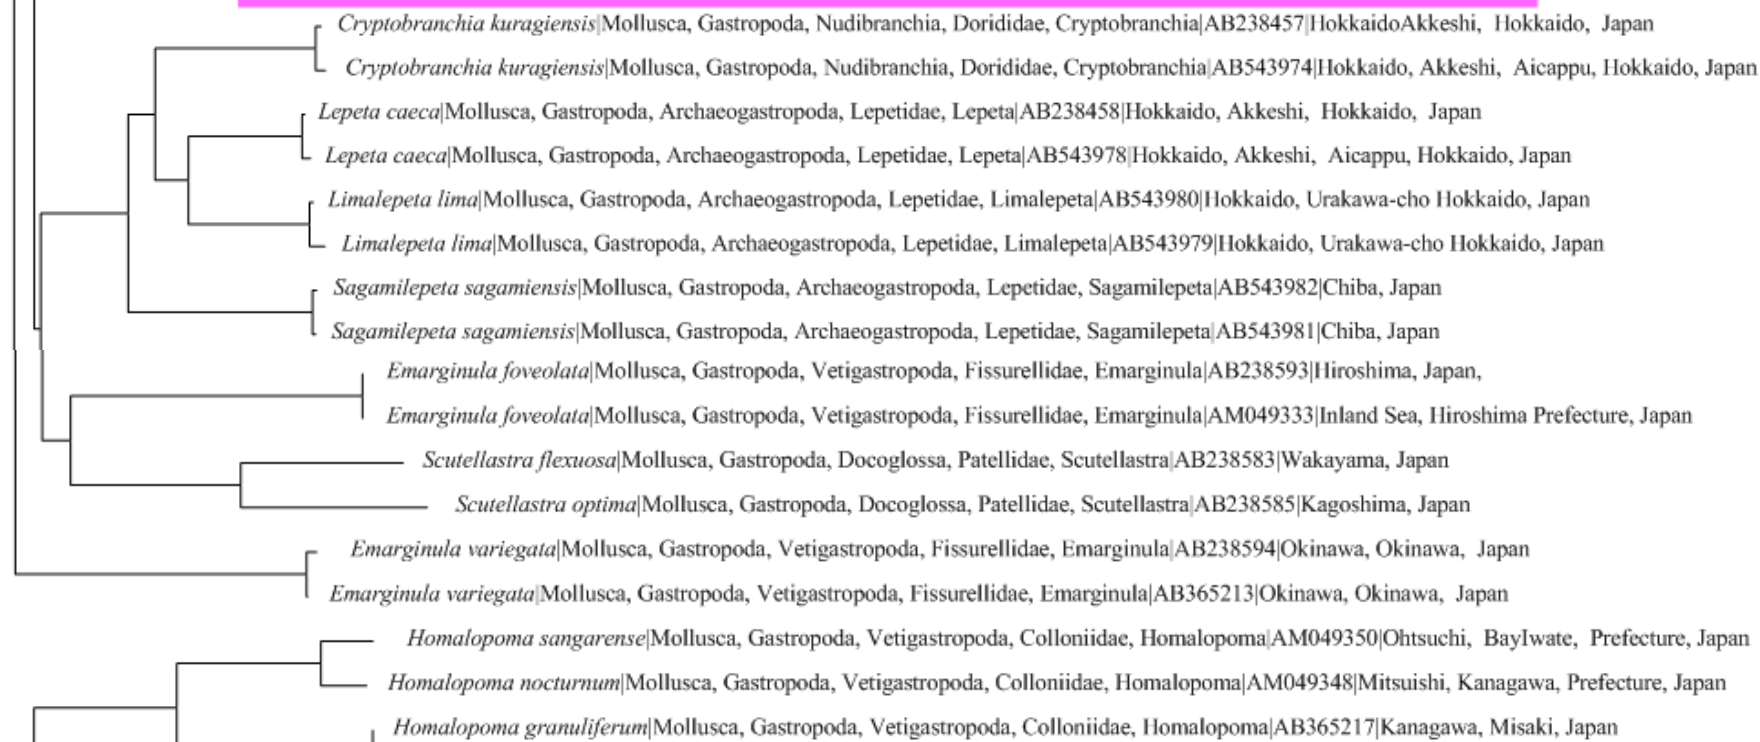



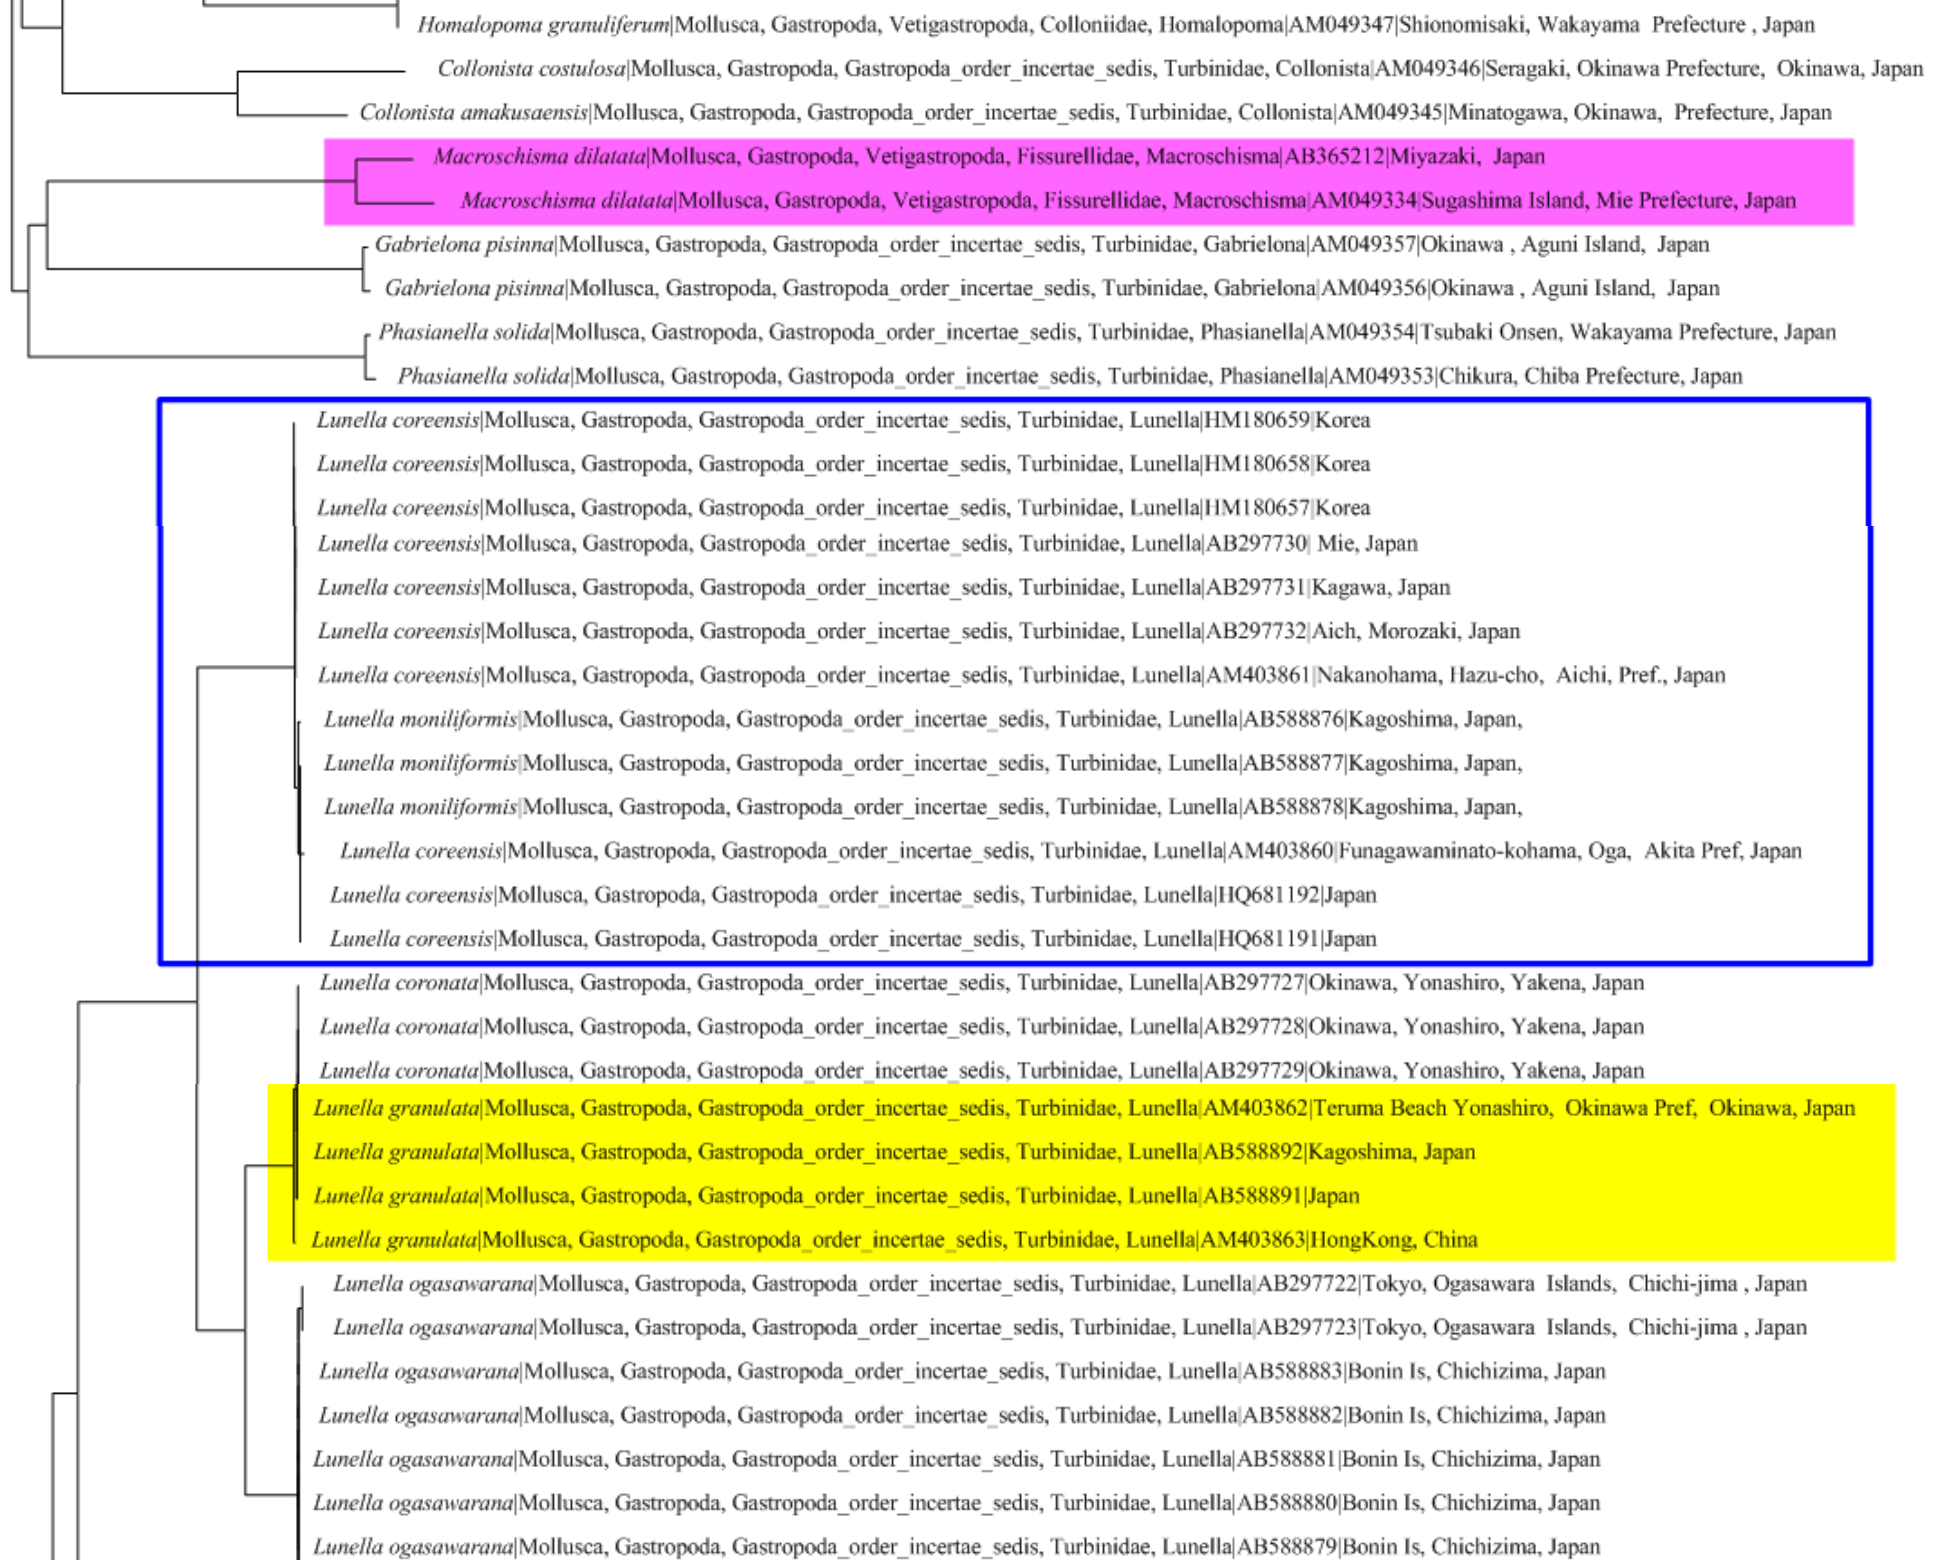

*Lunella ogasawarana*|Mollusca, Gastropoda, Gastropoda\_order\_incertae\_sedis, Turbinidae, Lunella|AB588879|Bonin Is, Chichizima, Japan  
*Lunella ogasawarana*|Mollusca, Gastropoda, Gastropoda\_order\_incertae\_sedis, Turbinidae, Lunella|AB297725|Tokyo, Ogasawara Islands, Chichi-jima, Japan  
*Lunella ogasawarana*|Mollusca, Gastropoda, Gastropoda\_order\_incertae\_sedis, Turbinidae, Lunella|AB297724|Tokyo, Ogasawara Islands, Chichi-jima, Japan  
*Lunella ogasawarana*|Mollusca, Gastropoda, Gastropoda\_order\_incertae\_sedis, Turbinidae, Lunella|AB297726|Tokyo, Ogasawara Islands, Chichi-jima, Japan  
*Lunella cinerea*|Mollusca, Gastropoda, Gastropoda\_order\_incertae\_sedis, Turbinidae, Lunella|AB297733|Okinawa, Iriomote Island, Okinawa, Japan  
*Lunella cinerea*|Mollusca, Gastropoda, Gastropoda\_order\_incertae\_sedis, Turbinidae, Lunella|AB297734|Okinawa, Iriomote Island, Okinawa, Japan  
*Lunella cinerea*|Mollusca, Gastropoda, Gastropoda\_order\_incertae\_sedis, Turbinidae, Lunella|AB588872|Okinawa, Iriomote Is, Okinawa, Japan  
*Lunella cinerea*|Mollusca, Gastropoda, Gastropoda\_order\_incertae\_sedis, Turbinidae, Lunella|AB297735|Okinawa, Iriomote Island, Okinawa, Japan  
*Angaria formosa*|Mollusca, Gastropoda, Gastropoda\_order\_incertae\_sedis, Turbinidae, Angaria|AM049343|Hinomisaki, Wakayama Prefecture, Japan  
*Angaria formosa*|Mollusca, Gastropoda, Gastropoda\_order\_incertae\_sedis, Turbinidae, Angaria|AM049342|Sunabe, Okinawa Prefecture, Okinawa, Japan  
*Dillwynella vitrea*|Mollusca, Gastropoda, Archaeogastropoda, Skeneidae, Dillwynella|EU530143|Japan  
*Dillwynella vitrea*|Mollusca, Gastropoda, Archaeogastropoda, Skeneidae, Dillwynella|AM049336|Owase City, Mie Prefecture, Japan  
*Turbo cornutus*|Mollusca, Gastropoda, Gastropoda\_order\_incertae\_sedis, Turbinidae, Turbo|HM180934|Korea  
*Turbo cornutus*|Mollusca, Gastropoda, Gastropoda\_order\_incertae\_sedis, Turbinidae, Turbo|AM403881|Morozaki, Minamichita-cho, Aichi Pref. Japan  
*Turbo cornutus*|Mollusca, Gastropoda, Gastropoda\_order\_incertae\_sedis, Turbinidae, Turbo|AM403882|Kii Nagashima, Mie Pref., Japan  
*Turbo cornutus*|Mollusca, Gastropoda, Gastropoda\_order\_incertae\_sedis, Turbinidae, Turbo|HM180933|Korea  
*Turbo cornutus*|Mollusca, Gastropoda, Gastropoda\_order\_incertae\_sedis, Turbinidae, Turbo|HM180932|Korea  
*Turbo marmoratus*|Mollusca, Gastropoda, Gastropoda\_order\_incertae\_sedis, Turbinidae, Turbo|AM403894|Kin, Okinawa Pref., Japan  
*Turbo marmoratus*|Mollusca, Gastropoda, Gastropoda\_order\_incertae\_sedis, Turbinidae, Turbo|AM403895|Chinen, Okinawa Pref, Japan  
*Turbo argyrostomus*|Mollusca, Gastropoda, Gastropoda\_order\_incertae\_sedis, Turbinidae, Turbo|AM403899|Itoman, Okinawa, Pref., Japan  
*Turbo chrysostomus*|Mollusca, Gastropoda, Gastropoda\_order\_incertae\_sedis, Turbinidae, Turbo|AM403903|Iriomote I., Taketomi, Okinawa Pref. Japan  
*Turbo setosus*|Mollusca, Gastropoda, Gastropoda\_order\_incertae\_sedis, Turbinidae, Turbo|AM403909|Higashizaki, Yonaguni I., Okinawa Pref., Japan  
*Turbo stenogyrus*|Mollusca, Gastropoda, Gastropoda\_order\_incertae\_sedis, Turbinidae, Turbo|AM403915|HinomisakiHidaka, Wakayama, Pref, Japan  
*Turbo stenogyrus*|Mollusca, Gastropoda, Gastropoda\_order\_incertae\_sedis, Turbinidae, Turbo|AM403916|Teruma Beach Yonashiro, Okinawa Pref, Okinawa, Japan  
*Turbo reevii*|Mollusca, Gastropoda, Gastropoda\_order\_incertae\_sedis, Turbinidae, Turbo|AM403878|Sakai, Minabe, Wakayama Pref., Japan  
*Turbo petholatus*|Mollusca, Gastropoda, Gastropoda\_order\_incertae\_sedis, Turbinidae, Turbo|AM049383|Seragaki, Okinawa Prefecture, Okinawa, Japan  
*Pomaulax japonicus*|Mollusca, Gastropoda, Gastropoda\_order\_incertae\_sedis, Turbinidae, Pomaulax|AB297737|Chiba, Japan  
*Pomaulax japonicus*|Mollusca, Gastropoda, Gastropoda\_order\_incertae\_sedis, Turbinidae, Pomaulax|AM049380|KatsuuraChiba, Prefecture, Japan  
*Guildfordia yoka*|Mollusca, Gastropoda, Gastropoda\_order\_incertae\_sedis, Turbinidae, Guildfordia|EU530156|Japan  
*Guildfordia yoka*|Mollusca, Gastropoda, Gastropoda\_order\_incertae\_sedis, Turbinidae, Guildfordia|AM049377|Okinawa I., Okinawa Prefecture, Okinawa, Japan  
*Guildfordia yoka*|Mollusca, Gastropoda, Gastropoda\_order\_incertae\_sedis, Turbinidae, Guildfordia|AM049378|Okinawa, I., Okinawa Prefecture, Okinawa, Japan  
*Guildfordia triumphans*|Mollusca, Gastropoda, Gastropoda\_order\_incertae\_sedis, Turbinidae, Guildfordia|AM049376|Straits of Koshiki, Kagoshima Pref. Japan  
*Guildfordia triumphans*|Mollusca, Gastropoda, Gastropoda\_order\_incertae\_sedis, Turbinidae, Guildfordia|AM049375|Sakai, Wakayama Prefecture, Japan  
*Chlorostoma turbinatum*|Mollusca, Gastropoda, Vetigastropoda, Trochidae, Chlorostoma|HM180526|Korea  
*Chlorostoma turbinatum*|Mollusca, Gastropoda, Vetigastropoda, Trochidae, Chlorostoma|HM180522|Korea  
*Chlorostoma turbinatum*|Mollusca, Gastropoda, Vetigastropoda, Trochidae, Chlorostoma|HM180518|Korea

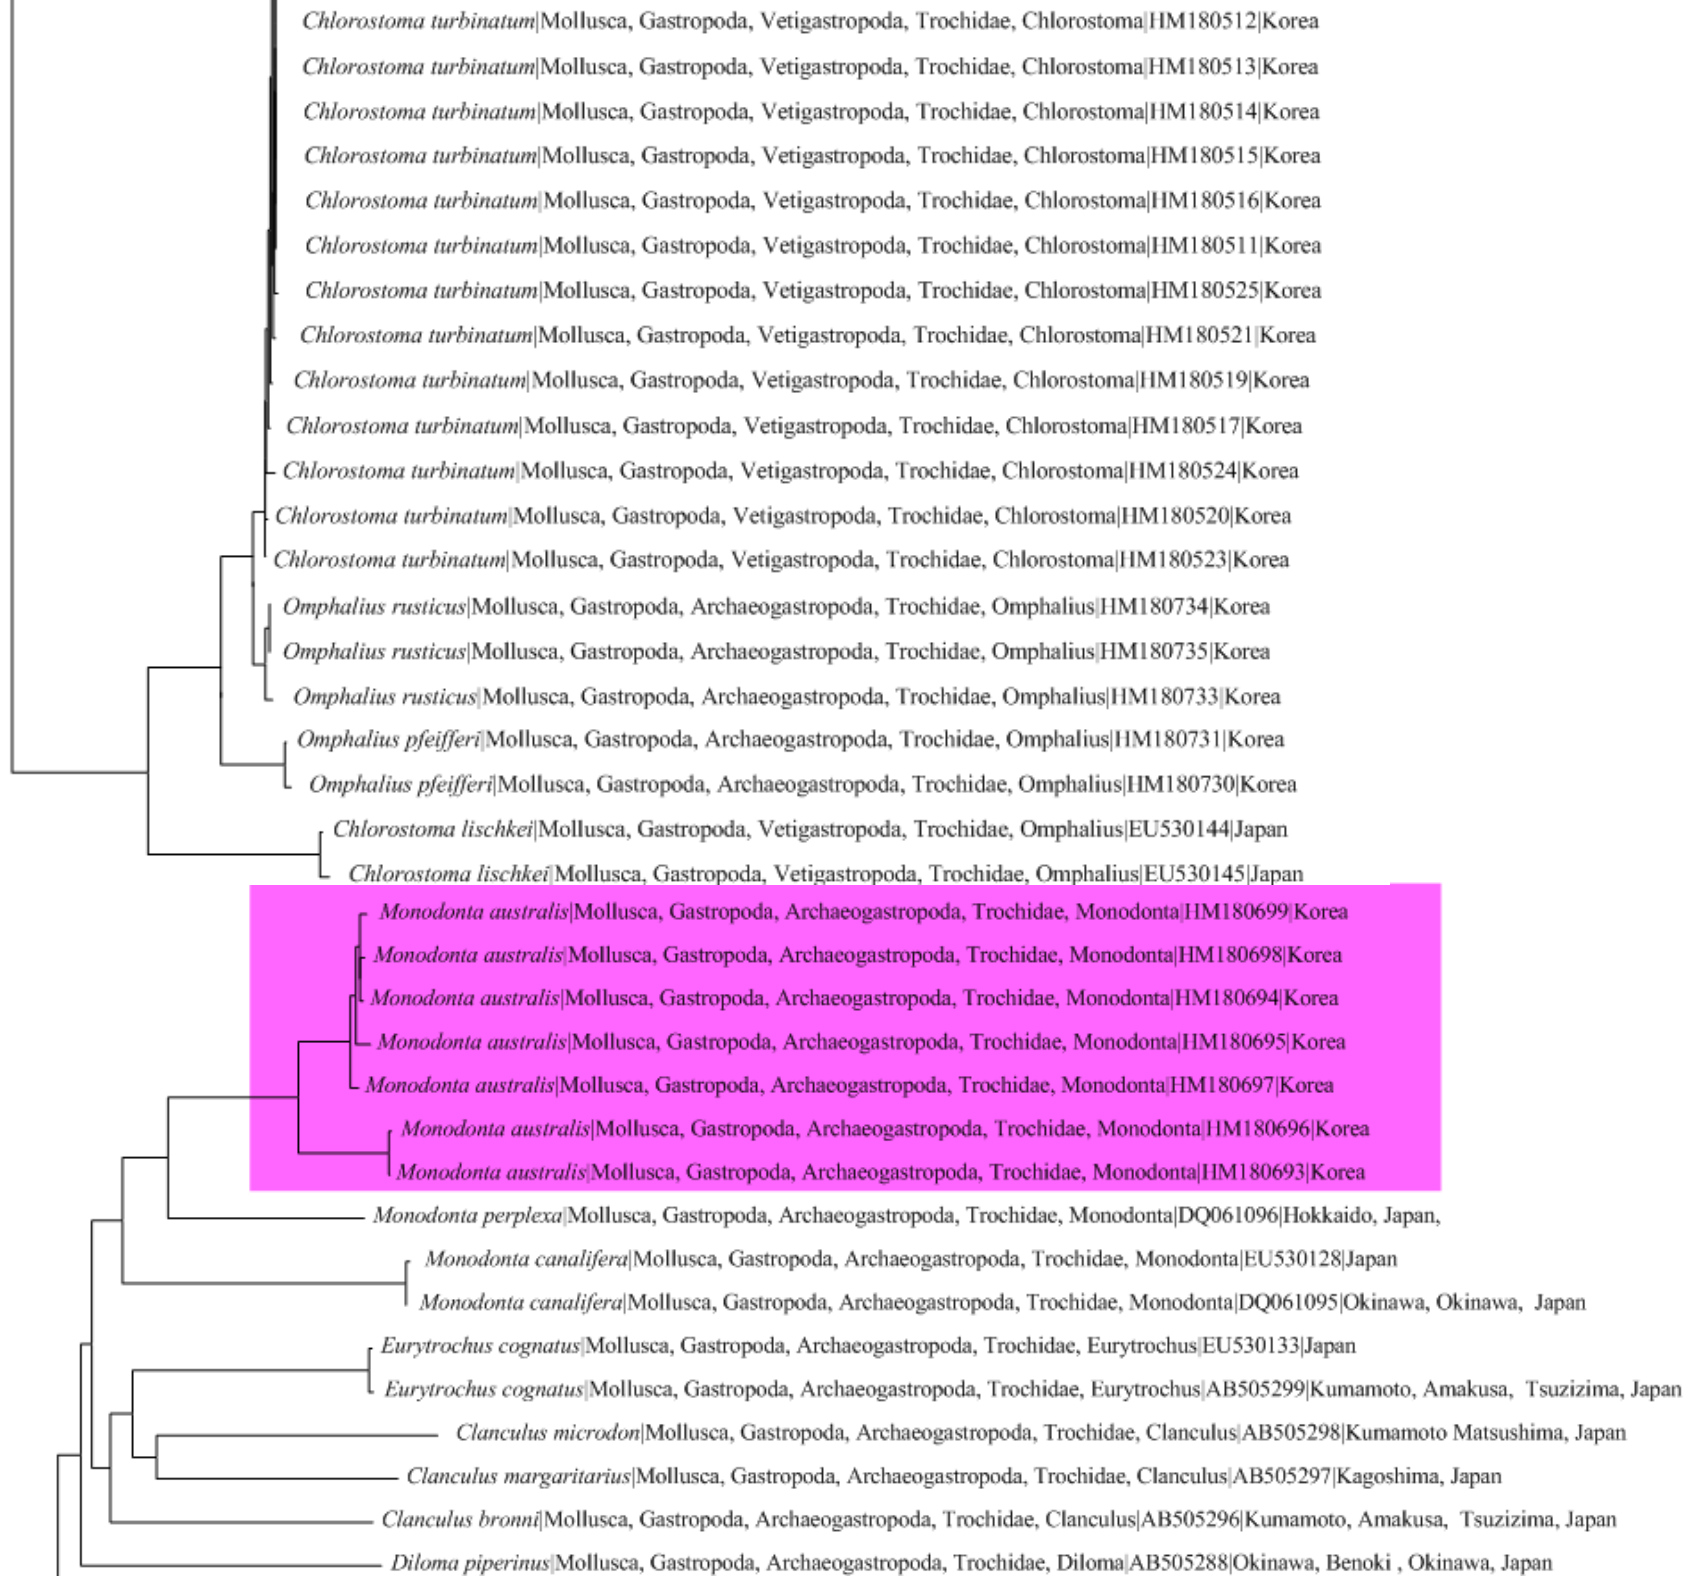

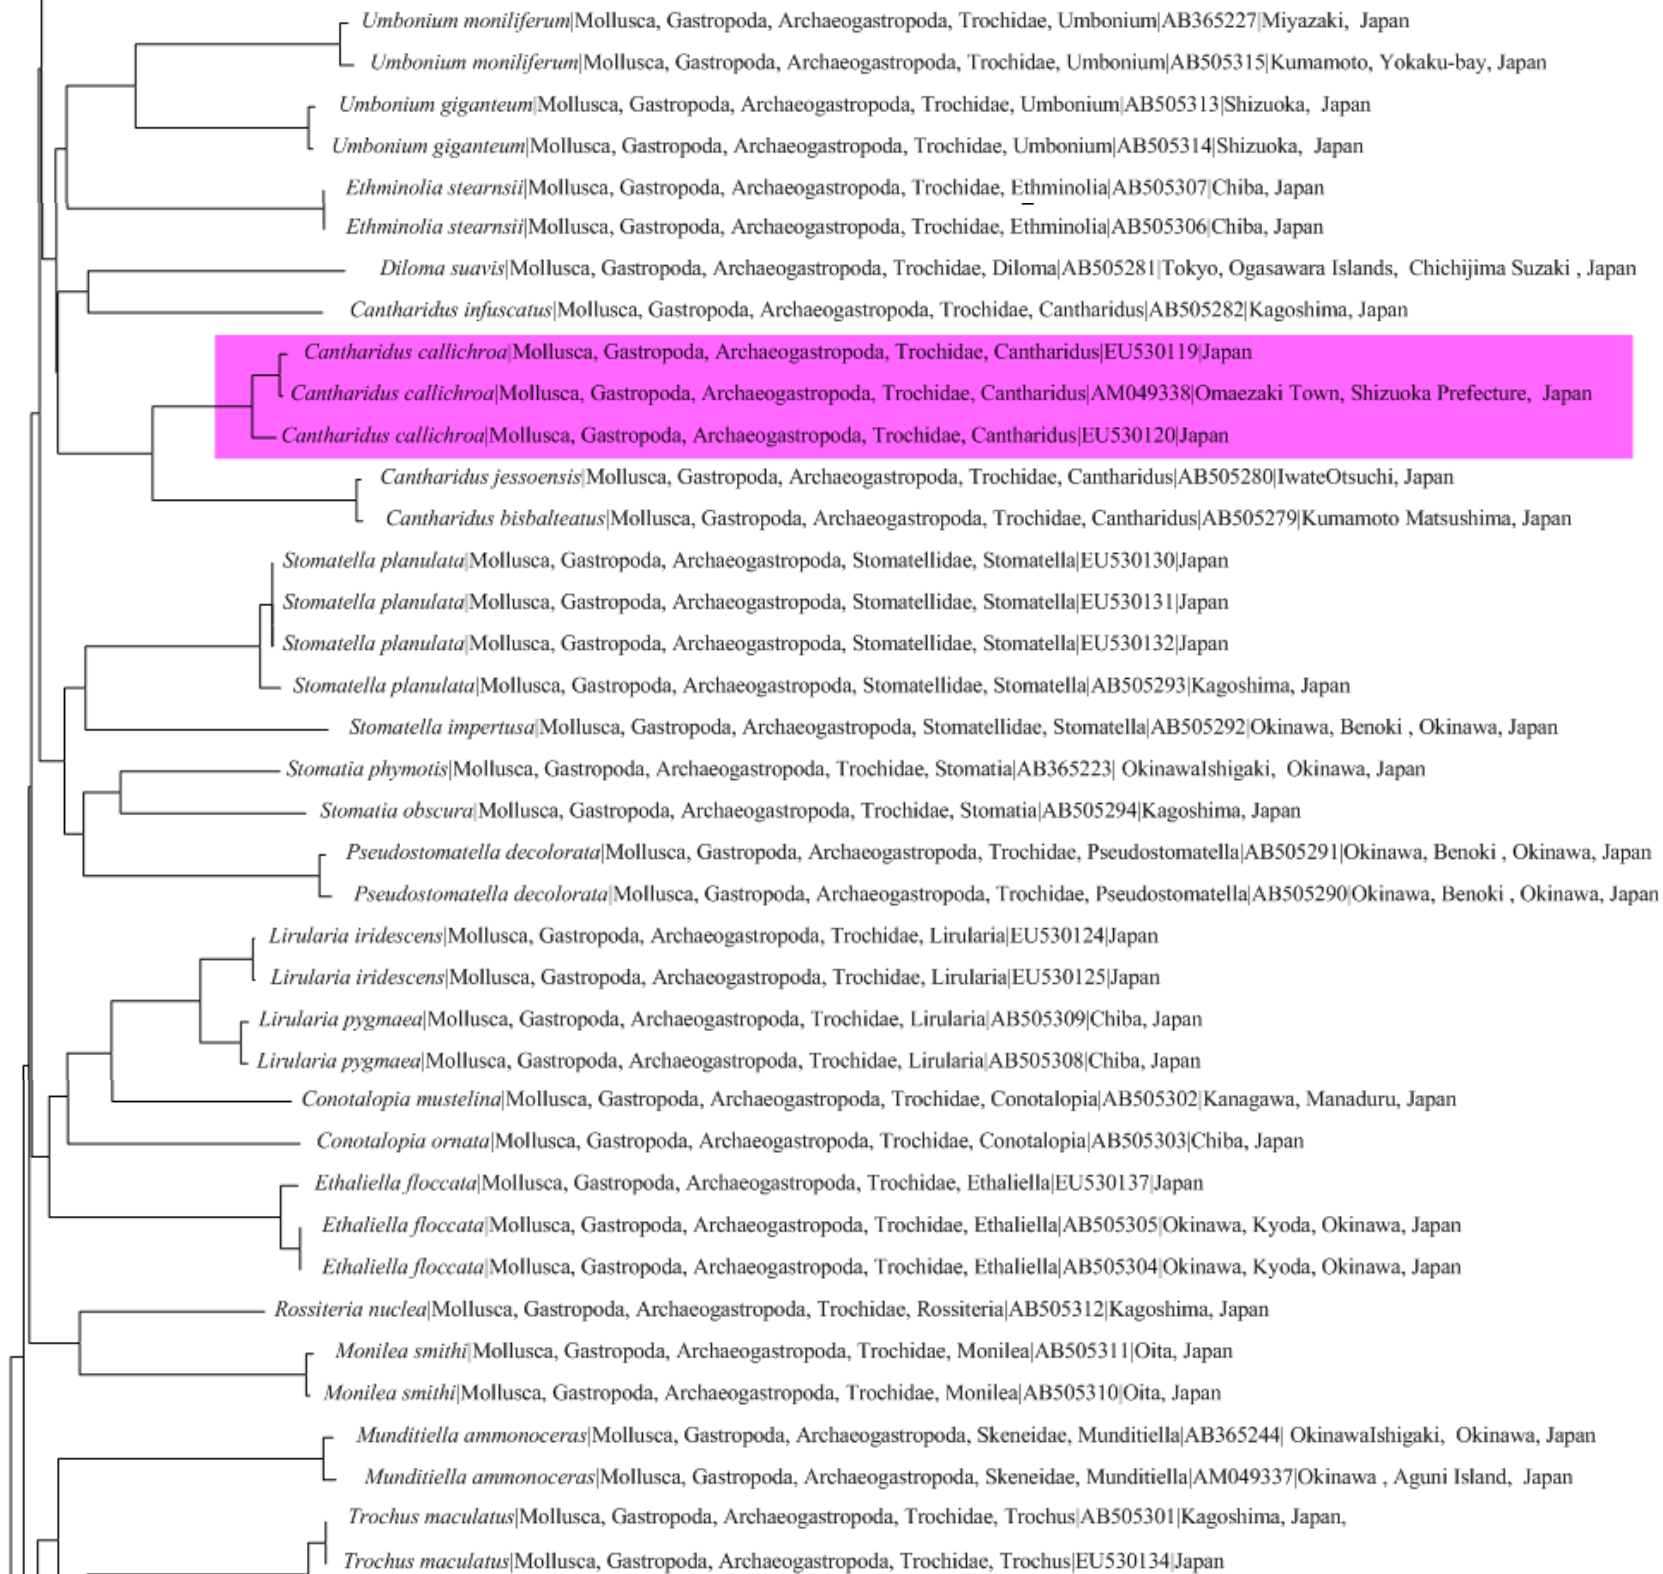

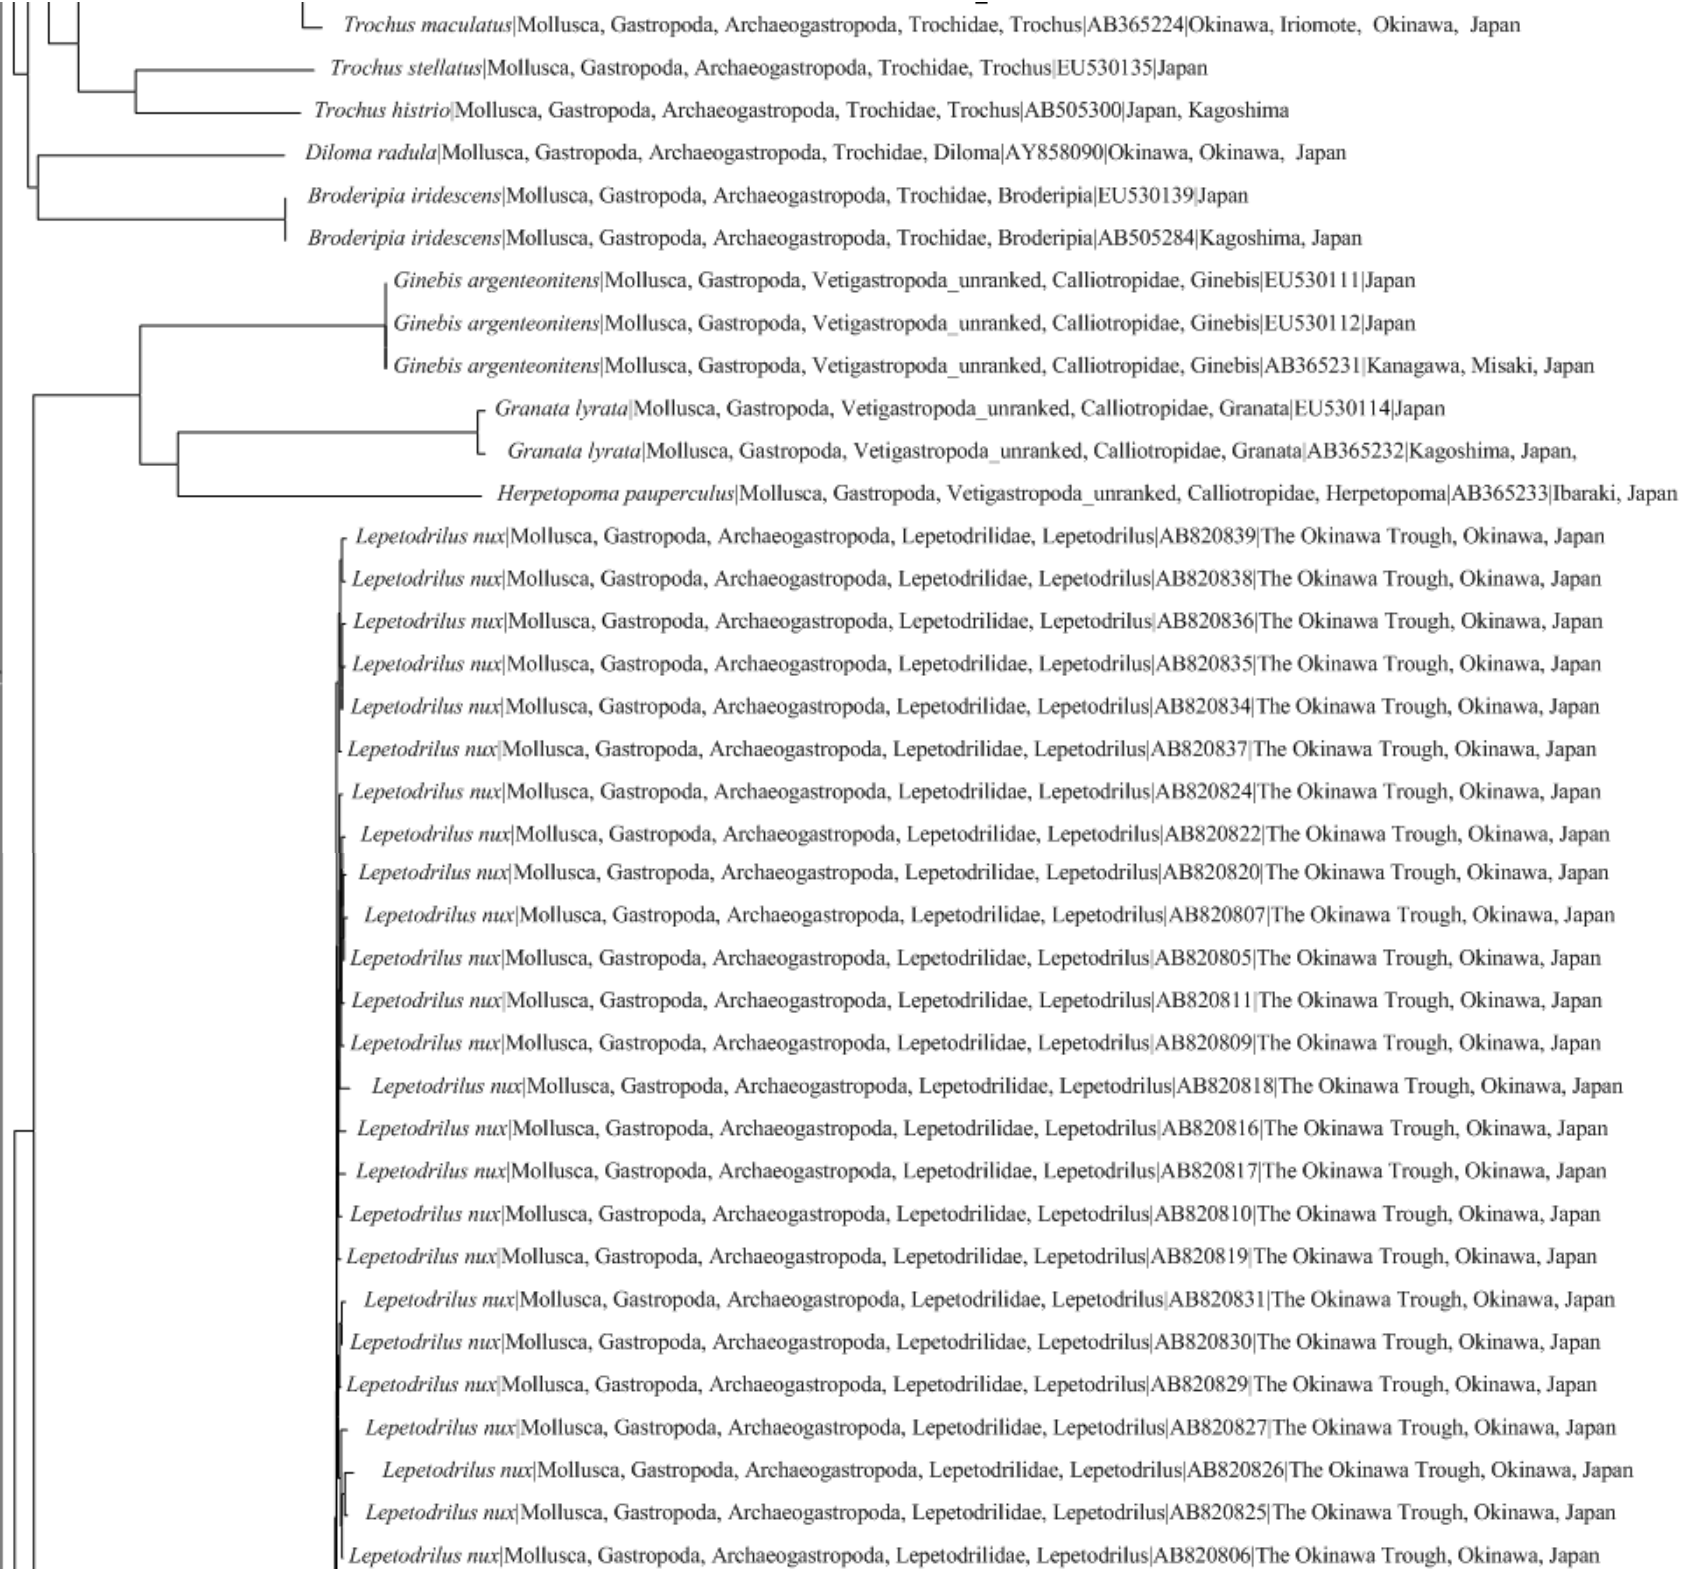

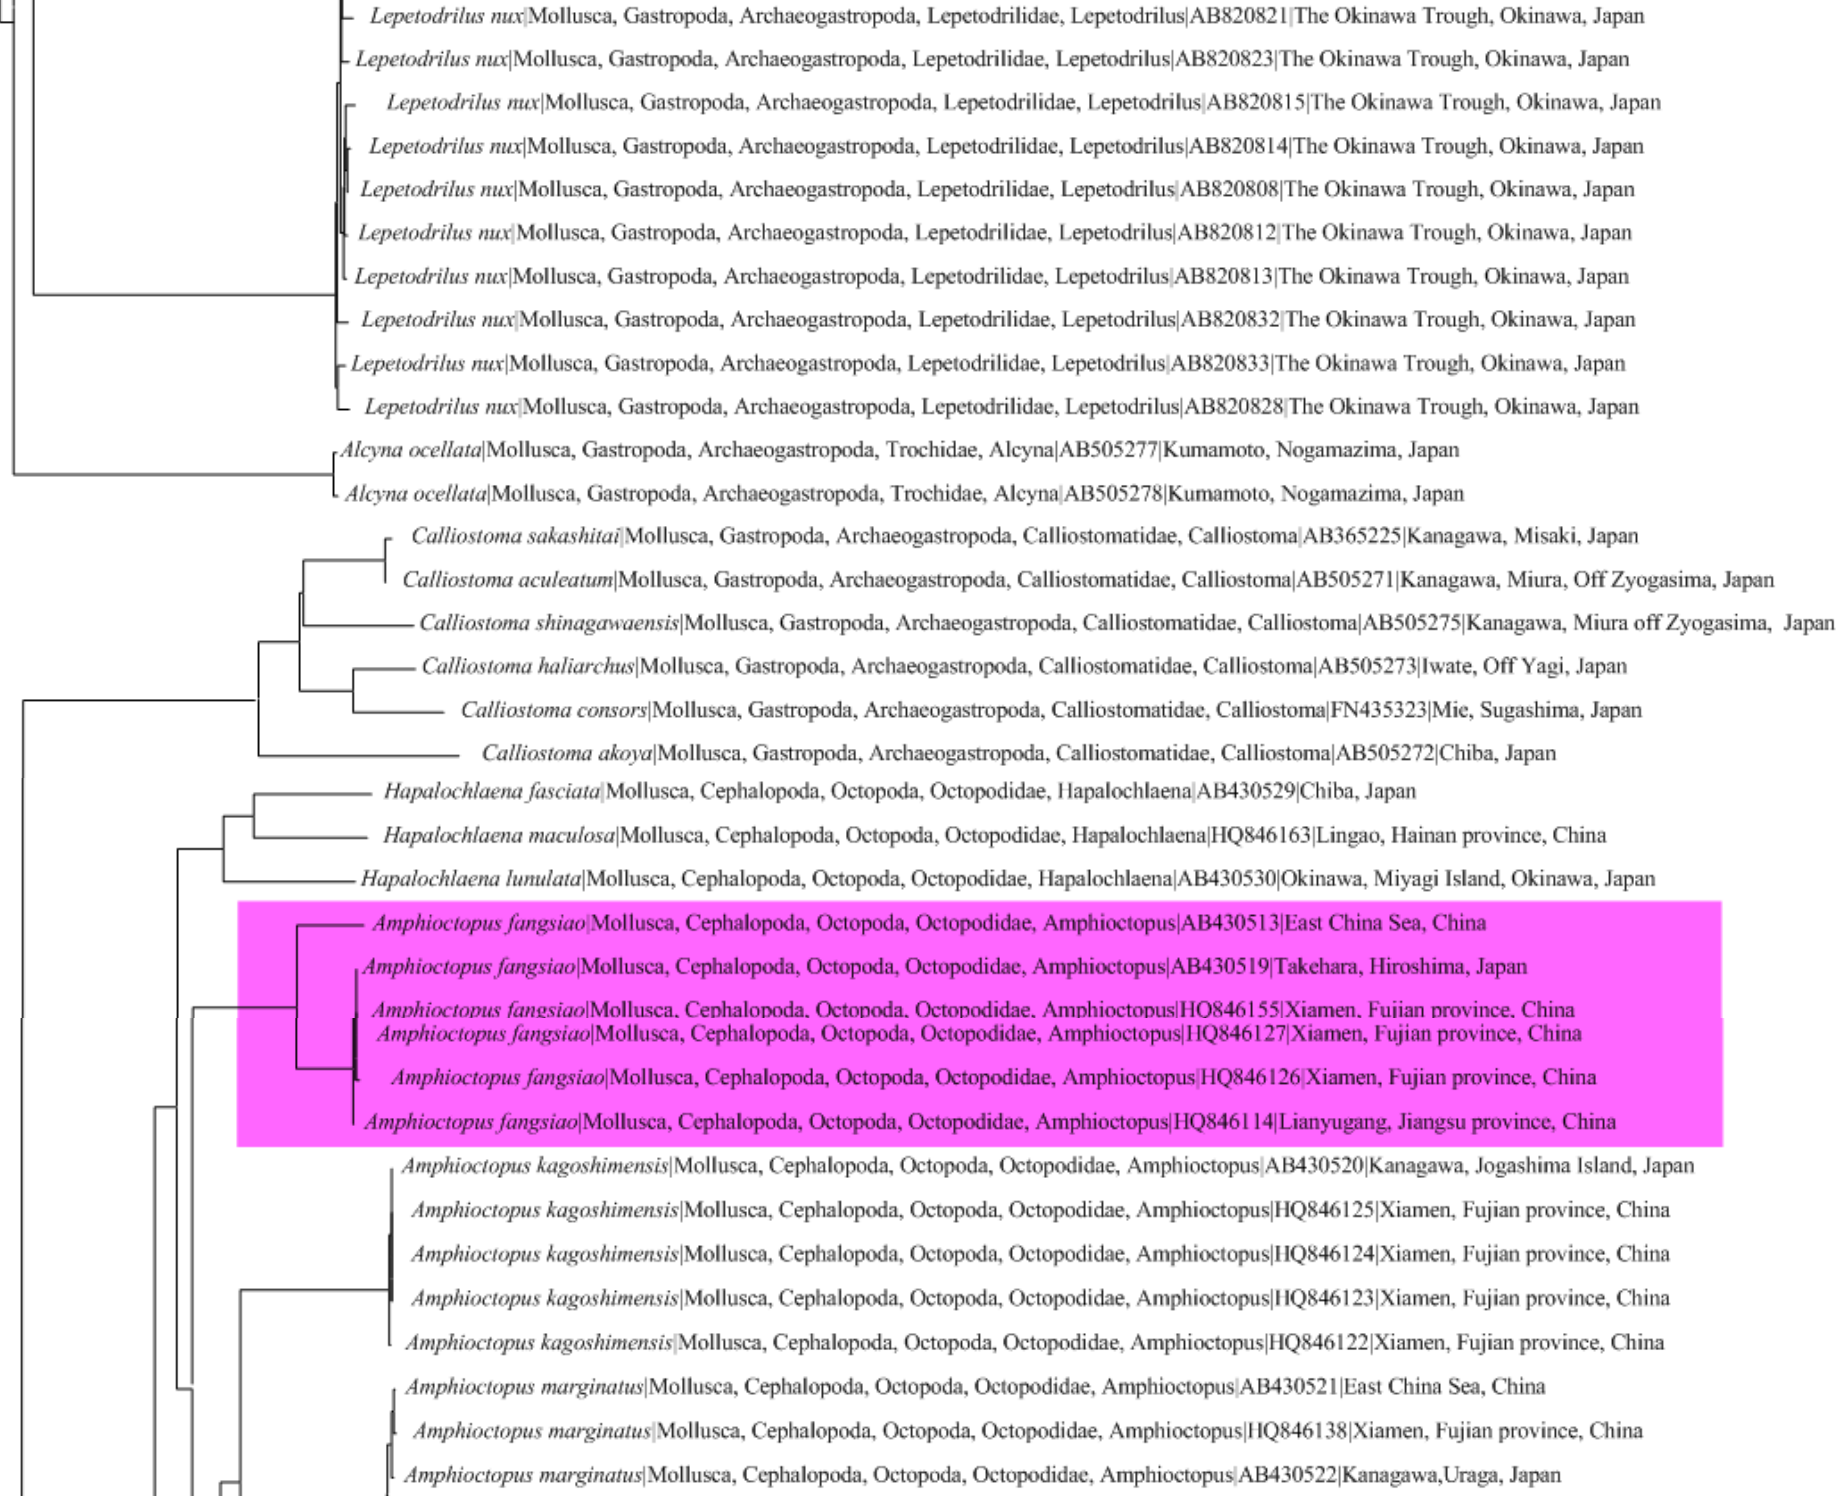

*Amphioctopus marginatus*[Mollusca, Cephalopoda, Octopoda, Octopodidae, Amphioctopus|HQ846140|Xiamen, Fujian province, China  
*Amphioctopus marginatus*[Mollusca, Cephalopoda, Octopoda, Octopodidae, Amphioctopus|HQ846140|Xiamen, Fujian province, China  
*Amphioctopus marginatus*[Mollusca, Cephalopoda, Octopoda, Octopodidae, Amphioctopus|HQ846139|Xiamen, Fujian province, China  
*Amphioctopus aegina*[Mollusca, Cephalopoda, Octopoda, Octopodidae, Amphioctopus|JX456267|China  
*Amphioctopus aegina*[Mollusca, Cephalopoda, Octopoda, Octopodidae, Amphioctopus|HQ846135|Xiamen, Fujian province, China  
*Amphioctopus aegina*[Mollusca, Cephalopoda, Octopoda, Octopodidae, Amphioctopus|HQ846136|Xiamen, Fujian province, China  
*Amphioctopus aegina*[Mollusca, Cephalopoda, Octopoda, Octopodidae, Amphioctopus|HQ846137|Xiamen, Fujian province, China  
*Amphioctopus aegina*[Mollusca, Cephalopoda, Octopoda, Octopodidae, Amphioctopus|HQ846134|Lingao, Hainan province, China  
*Amphioctopus aegina*[Mollusca, Cephalopoda, Octopoda, Octopodidae, Amphioctopus|HQ846133|Lingao, Hainan province, China  
*Amphioctopus aegina*[Mollusca, Cephalopoda, Octopoda, Octopodidae, Amphioctopus|HQ846132|Lingao, Hainan province, China  
*Amphioctopus ovulum*[Mollusca, Cephalopoda, Octopoda, Octopodidae, Amphioctopus|AB430523|China  
*Amphioctopus ovulum*[Mollusca, Cephalopoda, Octopoda, Octopodidae, Amphioctopus|HQ846159|Xiamen, Fujian province, China  
*Amphioctopus ovulum*[Mollusca, Cephalopoda, Octopoda, Octopodidae, Amphioctopus|HQ846157|Xiamen, Fujian province, China  
*Amphioctopus ovulum*[Mollusca, Cephalopoda, Octopoda, Octopodidae, Amphioctopus|HQ846158|Xiamen, Fujian province, China  
*Amphioctopus ovulum*[Mollusca, Cephalopoda, Octopoda, Octopodidae, Amphioctopus|HQ846156|Xiamen, Fujian province, China  
*Amphioctopus ovulum*[Mollusca, Cephalopoda, Octopoda, Octopodidae, Amphioctopus|AB430524|Kouchi, Japan  
*Octopus oliveri*[Mollusca, Cephalopoda, Octopoda, Octopodidae, Octopus|AB430532|Tokyo, Ogasawara Island, Japan  
*Octopus vulgaris*[Mollusca, Cephalopoda, Octopoda, Octopodidae, Octopus|AB430546|Hyougo, Japan  
*Octopus vulgaris*[Mollusca, Cephalopoda, Octopoda, Octopodidae, Octopus|AB430547|Kanagawa, Misaki, Japan  
*Octopus vulgaris*[Mollusca, Cephalopoda, Octopoda, Octopodidae, Octopus|JX456268|China  
*Octopus vulgaris*[Mollusca, Cephalopoda, Octopoda, Octopodidae, Octopus|JX456270|China  
*Octopus vulgaris*[Mollusca, Cephalopoda, Octopoda, Octopodidae, Octopus|HQ846110|Wenzhou, Zhejiang province, China  
*Octopus vulgaris*[Mollusca, Cephalopoda, Octopoda, Octopodidae, Octopus|HQ846154|Xiamen, Fujian province, China  
*Octopus cyanea*[Mollusca, Cephalopoda, Octopoda, Octopodidae, Octopus|AB430534|Tokyo, Ogasawara Island, Japan,  
*Octopus cyanea*[Mollusca, Cephalopoda, Octopoda, Octopodidae, Octopus|AB430535|Okinawa, Nakagusuku, Okinawa, Japan  
*Octopus laqueus*[Mollusca, Cephalopoda, Octopoda, Octopodidae, Octopus|AB430543|Okinawa, Kadena, Mizugama, Okinawa, Japan  
*Octopus parvus*[Mollusca, Cephalopoda, Octopoda, Octopodidae, Octopus|AB430544|Kanagawa, Misaki, Japan  
*Octopus tankahkeei*[Mollusca, Cephalopoda, Octopoda, Octopodidae, Octopus|JX456264|China  
*Cistopus indicus*[Mollusca, Cephalopoda, Octopoda, Octopodidae, Cistopus|JX456269|China  
*Cistopus taiwanicus*[Mollusca, Cephalopoda, Octopoda, Octopodidae, Cistopus|HQ846142|Xiamen, Fujian province, China  
*Cistopus taiwanicus*[Mollusca, Cephalopoda, Octopoda, Octopodidae, Cistopus|HQ846143|Xiamen, Fujian province, China  
*Octopus incella*[Mollusca, Cephalopoda, Octopoda, Octopodidae, Octopus|AB430542|Okinawa, Motobu, Hamamoto, Okinawa, Japan  
*Octopus nanhaiensis*[Mollusca, Cephalopoda, Octopoda, Octopodidae, Octopus|HQ846121|Sanya, Hainan province, China  
*Octopus wolffi*[Mollusca, Cephalopoda, Octopoda, Octopodidae, Octopus|AB430545|Okinawa, Kadena, Mizugama, Okinawa, Japan  
*Octopus conispadiceus*[Mollusca, Cephalopoda, Octopoda, Octopodidae, Octopus|AB430533|Hokkaido, Kushiro, Hokkaido, Japan

*Sepia subtenuiipes*[Mollusca, Cephalopoda, Sepiida, Sepiidae, Sepia|AB430414|Shizuoka, Japan  
*Octopus longispadiceus*[Mollusca, Cephalopoda, Octopoda, Octopodidae, Octopus|AB430537|Hyogo, Kasumi, Shirosaki, Japan  
*Callistoctopus ornatus*[Mollusca, Cephalopoda, Octopoda, Octopodidae, Callistoctopus|AB430528|Okinawa, Ohdo Beach, Okinawa, Japan  
*Callistoctopus aspilosomatis*[Mollusca, Cephalopoda, Octopoda, Octopodidae, Callistoctopus|AB430525|Okinawa, Miyagi Island, Okinawa, Japan  
*Callistoctopus minor*[Mollusca, Cephalopoda, Octopoda, Octopodidae, Callistoctopus|AB430541|Ehime, Imabari, Miyakubo, Japan  
*Callistoctopus minor*[Mollusca, Cephalopoda, Octopoda, Octopodidae, Callistoctopus|HQ846113|Rongcheng, Shandong province, China  
*Callistoctopus minor*[Mollusca, Cephalopoda, Octopoda, Octopodidae, Callistoctopus|HQ846115|Rongcheng, Shandong province, China  
*Callistoctopus minor*[Mollusca, Cephalopoda, Octopoda, Octopodidae, Callistoctopus|HQ846119|Dandong, Liaoning province, China  
*Callistoctopus minor*[Mollusca, Cephalopoda, Octopoda, Octopodidae, Callistoctopus|HQ846118|Dandong, Liaoning province, China  
*Callistoctopus minor*[Mollusca, Cephalopoda, Octopoda, Octopodidae, Callistoctopus|HQ846116|Rizhao, Shandong province, China  
*Callistoctopus minor*[Mollusca, Cephalopoda, Octopoda, Octopodidae, Callistoctopus|HQ846117|Rizhao, Shandong province, China  
*Callistoctopus luteus*[Mollusca, Cephalopoda, Octopoda, Octopodidae, Callistoctopus|AB430527|Kanagawa, Miura, Japan  
*Callistoctopus luteus*[Mollusca, Cephalopoda, Octopoda, Octopodidae, Callistoctopus|AB430526|Okinawa, Ohdo Beach, Okinawa, Japan

*Sepioteuthis lessoniana*[Mollusca, Cephalopoda, Myopsida, Loliginidae, Sepioteuthis|AB986226|Tokushima, Mugi, Japan  
*Sepioteuthis lessoniana*[Mollusca, Cephalopoda, Myopsida, Loliginidae, Sepioteuthis|AB986225|Tokushima, Mugi, Japan  
*Sepioteuthis lessoniana*[Mollusca, Cephalopoda, Myopsida, Loliginidae, Sepioteuthis|AB986224|Tokushima, Mugi, Japan  
*Sepioteuthis lessoniana*[Mollusca, Cephalopoda, Myopsida, Loliginidae, Sepioteuthis|AB986222|Tokushima, Mugi, Japan  
*Sepioteuthis lessoniana*[Mollusca, Cephalopoda, Myopsida, Loliginidae, Sepioteuthis|EU349466|HongKong, China  
*Sepioteuthis lessoniana*[Mollusca, Cephalopoda, Myopsida, Loliginidae, Sepioteuthis|HQ529540|Rizhao, Shandong province, China  
*Sepioteuthis lessoniana*[Mollusca, Cephalopoda, Myopsida, Loliginidae, Sepioteuthis|HQ529542|Rizhao, Shandong province, China  
*Sepioteuthis lessoniana*[Mollusca, Cephalopoda, Myopsida, Loliginidae, Sepioteuthis|HQ529541|Rizhao, Shandong province, China  
*Sepioteuthis lessoniana*[Mollusca, Cephalopoda, Myopsida, Loliginidae, Sepioteuthis|AB986223|Tokushima, Mugi, Japan  
*Sepioteuthis lessoniana*[Mollusca, Cephalopoda, Myopsida, Loliginidae, Sepioteuthis|AB986221|Tokushima, Mugi, Japan  
*Sepioteuthis lessoniana*[Mollusca, Cephalopoda, Myopsida, Loliginidae, Sepioteuthis|AB986220|Kagoshima, Tanega-shima Island, Japan  
*Sepioteuthis lessoniana*[Mollusca, Cephalopoda, Myopsida, Loliginidae, Sepioteuthis|AB986219|Kagoshima, Tanega-shima Island, Japan  
*Sepioteuthis lessoniana*[Mollusca, Cephalopoda, Myopsida, Loliginidae, Sepioteuthis|AB986218|Kagoshima, Tanega-shima Island, Japan  
*Sepioteuthis lessoniana*[Mollusca, Cephalopoda, Myopsida, Loliginidae, Sepioteuthis|AB986217|Kagoshima, Tanega-shima Island, Japan  
*Sepioteuthis lessoniana*[Mollusca, Cephalopoda, Myopsida, Loliginidae, Sepioteuthis|AB986216|Kagoshima, Tanega-shima Island, Japan  
*Sepioteuthis lessoniana*[Mollusca, Cephalopoda, Myopsida, Loliginidae, Sepioteuthis|AB986215|Kagoshima, Tanega-shima Island, Japan  
*Sepioteuthis lessoniana*[Mollusca, Cephalopoda, Myopsida, Loliginidae, Sepioteuthis|AB986214|Kagoshima, Tanega-shima Island, Japan  
*Sepioteuthis lessoniana*[Mollusca, Cephalopoda, Myopsida, Loliginidae, Sepioteuthis|AB986213|Kagoshima, Tanega-shima Island, Japan

*Uroteuthis edulis*[Mollusca, Cephalopoda, Myopsida, Loliginidae, Uroteuthis|EU349447|Japan  
*Uroteuthis edulis*[Mollusca, Cephalopoda, Myopsida, Loliginidae, Uroteuthis|EU349448|Japan  
*Uroteuthis edulis*[Mollusca, Cephalopoda, Myopsida, Loliginidae, Uroteuthis|EU349449|Japan  
*Uroteuthis edulis*[Mollusca, Cephalopoda, Myopsida, Loliginidae, Uroteuthis|EU349450|Japan



*Uroteuthis edulis*[Mollusca, Cephalopoda, Myopsida, Loliginidae, Uroteuthis|EU349452|Japan  
*Uroteuthis edulis*[Mollusca, Cephalopoda, Myopsida, Loliginidae, Uroteuthis|EU349454|Japan  
*Uroteuthis edulis*[Mollusca, Cephalopoda, Myopsida, Loliginidae, Uroteuthis|EU349455|Japan  
*Uroteuthis edulis*[Mollusca, Cephalopoda, Myopsida, Loliginidae, Uroteuthis|EU349456|Japan  
*Uroteuthis edulis*[Mollusca, Cephalopoda, Myopsida, Loliginidae, Uroteuthis|EU349459|Shanghai, China  
*Uroteuthis edulis*[Mollusca, Cephalopoda, Myopsida, Loliginidae, Uroteuthis|EU349461|Shanghai, China  
*Uroteuthis edulis*[Mollusca, Cephalopoda, Myopsida, Loliginidae, Uroteuthis|EU349458|Shanghai, China  
*Uroteuthis edulis*[Mollusca, Cephalopoda, Myopsida, Loliginidae, Uroteuthis|EU349462|Shanghai, China  
*Uroteuthis edulis*[Mollusca, Cephalopoda, Myopsida, Loliginidae, Uroteuthis|EU349453|Japan  
*Uroteuthis edulis*[Mollusca, Cephalopoda, Myopsida, Loliginidae, Uroteuthis|EU349451|Japan  
*Uroteuthis edulis*[Mollusca, Cephalopoda, Myopsida, Loliginidae, Uroteuthis|EU349460|Shanghai, China  
*Uroteuthis edulis*[Mollusca, Cephalopoda, Myopsida, Loliginidae, Uroteuthis|KF032037|Saga, Japan  
*Uroteuthis edulis*[Mollusca, Cephalopoda, Myopsida, Loliginidae, Uroteuthis|AB675080|Yamaguchi, Japan  
*Uroteuthis edulis*[Mollusca, Cephalopoda, Myopsida, Loliginidae, Uroteuthis|AB675081|Shimane, Japan,  
*Uroteuthis edulis*[Mollusca, Cephalopoda, Myopsida, Loliginidae, Uroteuthis|KF032039|Saga, Japan  
*Uroteuthis edulis*[Mollusca, Cephalopoda, Myopsida, Loliginidae, Uroteuthis|KF032038|Saga, Japan  
*Uroteuthis edulis*[Mollusca, Cephalopoda, Myopsida, Loliginidae, Uroteuthis|KF032040|Numazu, Japan  
*Uroteuthis chinensis*[Mollusca, Cephalopoda, Myopsida, Loliginidae, Uroteuthis|EU349437|Xiamen, Fujian province, China  
*Uroteuthis chinensis*[Mollusca, Cephalopoda, Myopsida, Loliginidae, Uroteuthis|EU349444|Xiamen, Fujian province, China  
*Uroteuthis chinensis*[Mollusca, Cephalopoda, Myopsida, Loliginidae, Uroteuthis|EU349445|Xiamen, Fujian province, China  
*Uroteuthis chinensis*[Mollusca, Cephalopoda, Myopsida, Loliginidae, Uroteuthis|EU349438|Xiamen, Fujian province, China  
*Uroteuthis chinensis*[Mollusca, Cephalopoda, Myopsida, Loliginidae, Uroteuthis|EU349443|Xiamen, Fujian province, China  
*Uroteuthis chinensis*[Mollusca, Cephalopoda, Myopsida, Loliginidae, Uroteuthis|EU349446|Xiamen, Fujian province, China  
*Uroteuthis chinensis*[Mollusca, Cephalopoda, Myopsida, Loliginidae, Uroteuthis|HQ529528|Sanya, Hainan province, China  
*Loliolus japonica*[Mollusca, Cephalopoda, Teuthida, Loliginidae, Loliolus|HQ529522|Qinzhou, Guangxi province, China  
*Loliolus japonica*[Mollusca, Cephalopoda, Teuthida, Loliginidae, Loliolus|HQ529521|Qinzhou, Guangxi province, China  
*Loliolus japonica*[Mollusca, Cephalopoda, Teuthida, Loliginidae, Loliolus|HQ529517|Xiamen, Fujian province, China  
*Loliolus japonica*[Mollusca, Cephalopoda, Teuthida, Loliginidae, Loliolus|HQ529519|Xiamen, Fujian province, China  
*Loliolus japonica*[Mollusca, Cephalopoda, Teuthida, Loliginidae, Loliolus|HQ529520|Xiamen, Fujian province, China  
*Loliolus japonica*[Mollusca, Cephalopoda, Teuthida, Loliginidae, Loliolus|HQ529518|Xiamen, Fujian province, China  
*Loliolus beka*[Mollusca, Cephalopoda, Teuthida, Loliginidae, Loliolus|HQ529516|Yangjiang, Guangdong province, China  
*Loliolus beka*[Mollusca, Cephalopoda, Teuthida, Loliginidae, Loliolus|HQ529515|Yangjiang, Guangdong province, China  
*Loliolus beka*[Mollusca, Cephalopoda, Teuthida, Loliginidae, Loliolus|HQ529514|Rizhao, Shandong province, China  
*Loliolus beka*[Mollusca, Cephalopoda, Teuthida, Loliginidae, Loliolus|HQ529512|Rizhao, Shandong province, China

*Lololus beka*|Mollusca, Cephalopoda, Teuthida, Loliginidae, Lololus|HQ529502|Rizhao, Shandong province, China  
*Lololus beka*|Mollusca, Cephalopoda, Teuthida, Loliginidae, Lololus|HQ529513|Rizhao, Shandong province, China  
*Lololus beka*|Mollusca, Cephalopoda, Teuthida, Loliginidae, Lololus|HQ529505|Qingdao, Shandong province, China  
*Lololus beka*|Mollusca, Cephalopoda, Teuthida, Loliginidae, Lololus|HQ529511|Rizhao, Shandong province, China  
*Lololus beka*|Mollusca, Cephalopoda, Teuthida, Loliginidae, Lololus|HQ529510|Rizhao, Shandong province, China  
*Lololus beka*|Mollusca, Cephalopoda, Teuthida, Loliginidae, Lololus|HQ529507|Qingdao, Shandong province, China  
*Lololus beka*|Mollusca, Cephalopoda, Teuthida, Loliginidae, Lololus|HQ529503|Rizhao, Shandong province, China  
*Lololus beka*|Mollusca, Cephalopoda, Teuthida, Loliginidae, Lololus|HQ529509|Qingdao, Shandong province, China  
*Lololus beka*|Mollusca, Cephalopoda, Teuthida, Loliginidae, Lololus|HQ529506|Qingdao, Shandong province, China  
*Lololus beka*|Mollusca, Cephalopoda, Teuthida, Loliginidae, Lololus|HQ529508|Qingdao, Shandong province, China  
*Lololus beka*|Mollusca, Cephalopoda, Teuthida, Loliginidae, Lololus|HQ529503|Rizhao, Shandong province, China  
*Lololus uyii*|Mollusca, Cephalopoda, Teuthida, Loliginidae, Lololus|HQ529527|Sanya, Hainan province, China  
*Lololus uyii*|Mollusca, Cephalopoda, Teuthida, Loliginidae, Lololus|HQ529523|Sanya, Hainan province, China  
*Lololus uyii*|Mollusca, Cephalopoda, Teuthida, Loliginidae, Lololus|HQ529524|Yangjiang, Guangdong province, China  
*Lololus uyii*|Mollusca, Cephalopoda, Teuthida, Loliginidae, Lololus|HQ529526|Sanya, Hainan province, China  
*Lololus uyii*|Mollusca, Cephalopoda, Teuthida, Loliginidae, Lololus|HQ529525|Sanya, Hainan province, China  
*Uroteuthis duvaucelii*|Mollusca, Cephalopoda, Myopsida, Loliginidae, Uroteuthis|EU349463|Hongkong, China  
*Uroteuthis duvaucelii*|Mollusca, Cephalopoda, Myopsida, Loliginidae, Uroteuthis|EU349464|Hongkong, China  
*Uroteuthis duvaucelii*|Mollusca, Cephalopoda, Myopsida, Loliginidae, Uroteuthis|EU349465|Shanghai, China  
*Uroteuthis duvaucelii*|Mollusca, Cephalopoda, Myopsida, Loliginidae, Uroteuthis|HO529534|Pingtan, Fujian province, China  
*Uroteuthis duvaucelii*|Mollusca, Cephalopoda, Myopsida, Loliginidae, Uroteuthis|HQ529530|Qinzhou, Guangxi province, China  
*Uroteuthis duvaucelii*|Mollusca, Cephalopoda, Myopsida, Loliginidae, Uroteuthis|HQ529531|Sanya, Hainan province, China  
*Uroteuthis duvaucelii*|Mollusca, Cephalopoda, Myopsida, Loliginidae, Uroteuthis|HQ529532|Sanya, Hainan province, China  
*Uroteuthis duvaucelii*|Mollusca, Cephalopoda, Myopsida, Loliginidae, Uroteuthis|HQ529533|Pingtan, Fujian province, China  
*Uroteuthis duvaucelii*|Mollusca, Cephalopoda, Myopsida, Loliginidae, Uroteuthis|HQ529535|Beihai, Guangxi province, China  
*Uroteuthis duvaucelii*|Mollusca, Cephalopoda, Myopsida, Loliginidae, Uroteuthis|HQ529529|Qinzhou, Guangxi province, China  
*Uroteuthis duvaucelii*|Mollusca, Cephalopoda, Myopsida, Loliginidae, Uroteuthis|HQ529536|Beihai, Guangxi province, China  
*Architeuthis dux*|Mollusca, Cephalopoda, Decapodiformes\_incertae\_sedis, Idiosepiidae, Idiosepius|KC701730|Ogasawara, Japan  
*Architeuthis dux*|Mollusca, Cephalopoda, Decapodiformes\_incertae\_sedis, Idiosepiidae, Idiosepius|KC701731|Sea of Japan, Japan  
*Architeuthis dux*|Mollusca, Cephalopoda, Decapodiformes\_incertae\_sedis, Idiosepiidae, Idiosepius|KC701751|Sea of Japan, Japan  
*Architeuthis dux*|Mollusca, Cephalopoda, Decapodiformes\_incertae\_sedis, Idiosepiidae, Idiosepius|KC701741|Ohta City, Shimane Pref., Sea of Japan, Japan  
*Architeuthis dux*|Mollusca, Cephalopoda, Decapodiformes\_incertae\_sedis, Idiosepiidae, Idiosepius|KC701762|Sea of Japan, Japan  
*Architeuthis dux*|Mollusca, Cephalopoda, Decapodiformes\_incertae\_sedis, Idiosepiidae, Idiosepius|KC701757|Off Chichijima, Ogasawara, Japan  
*Uroteuthis sibogae*|Mollusca, Cephalopoda, Myopsida, Loliginidae, Uroteuthis|HQ529539|Xiamen, Fujian province, China  
*Uroteuthis sibogae*|Mollusca, Cephalopoda, Myopsida, Loliginidae, Uroteuthis|HQ529537|Xiamen, Fujian province, China

*Uroteuthis sibogae*|Mollusca, Cephalopoda, Myopsida, Loliginidae, Uroteuthis|HQ529538|Xiamen, Fujian province, China

*Heterololigo bleekeri*|Mollusca, Cephalopoda, Myopsida, Loliginidae, Heterololigo|AB441178|Japan

*Heterololigo bleekeri*|Mollusca, Cephalopoda, Myopsida, Loliginidae, Heterololigo|AB441181|Japan

*Heterololigo bleekeri*|Mollusca, Cephalopoda, Myopsida, Loliginidae, Heterololigo|AB441188|Japan

*Heterololigo bleekeri*|Mollusca, Cephalopoda, Myopsida, Loliginidae, Heterololigo|AB441190|Japan

*Heterololigo bleekeri*|Mollusca, Cephalopoda, Myopsida, Loliginidae, Heterololigo|AB441179|Japan

*Heterololigo bleekeri*|Mollusca, Cephalopoda, Myopsida, Loliginidae, Heterololigo|AB441185|Japan

*Heterololigo bleekeri*|Mollusca, Cephalopoda, Myopsida, Loliginidae, Heterololigo|AB441186|Japan

*Heterololigo bleekeri*|Mollusca, Cephalopoda, Myopsida, Loliginidae, Heterololigo|AB441180|Japan

*Heterololigo bleekeri*|Mollusca, Cephalopoda, Myopsida, Loliginidae, Heterololigo|AB441187|Japan

*Heterololigo bleekeri*|Mollusca, Cephalopoda, Myopsida, Loliginidae, Heterololigo|AB441182|Japan

*Heterololigo bleekeri*|Mollusca, Cephalopoda, Myopsida, Loliginidae, Heterololigo|AB441184|Japan

*Heterololigo bleekeri*|Mollusca, Cephalopoda, Myopsida, Loliginidae, Heterololigo|AB441189|Japan

*Heterololigo bleekeri*|Mollusca, Cephalopoda, Myopsida, Loliginidae, Heterololigo|AB573758|Japan

*Heterololigo bleekeri*|Mollusca, Cephalopoda, Myopsida, Loliginidae, Heterololigo|AB573756|Japan

*Heterololigo bleekeri*|Mollusca, Cephalopoda, Myopsida, Loliginidae, Heterololigo|AB573759|Japan

*Heterololigo bleekeri*|Mollusca, Cephalopoda, Myopsida, Loliginidae, Heterololigo|AB573761|Japan

*Heterololigo bleekeri*|Mollusca, Cephalopoda, Myopsida, Loliginidae, Heterololigo|AB573754|Japan

*Heterololigo bleekeri*|Mollusca, Cephalopoda, Myopsida, Loliginidae, Heterololigo|AB573755|Japan

*Heterololigo bleekeri*|Mollusca, Cephalopoda, Myopsida, Loliginidae, Heterololigo|AB573757|Japan

*Heterololigo bleekeri*|Mollusca, Cephalopoda, Myopsida, Loliginidae, Heterololigo|AB573760|Japan

*Idiosepius biserialis*|Mollusca, Cephalopoda, Decapodiformes\_incertae\_sedis, Idiosepiidae, Idiosepius|EU008953|Takasu, Japan

*Idiosepius biserialis*|Mollusca, Cephalopoda, Decapodiformes\_incertae\_sedis, Idiosepiidae, Idiosepius|EU008954|Takasu, Japan

*Idiosepius biserialis*|Mollusca, Cephalopoda, Decapodiformes\_incertae\_sedis, Idiosepiidae, Idiosepius|EU008955|Takasu, Japan

*Idiosepius paradoxus*|Mollusca, Cephalopoda, Decapodiformes\_incertae\_sedis, Idiosepiidae, Idiosepius|EU008979|Nagoya, Japan

*Idiosepius paradoxus*|Mollusca, Cephalopoda, Decapodiformes\_incertae\_sedis, Idiosepiidae, Idiosepius|EU008982|Nagoya, Japan

*Idiosepius paradoxus*|Mollusca, Cephalopoda, Decapodiformes\_incertae\_sedis, Idiosepiidae, Idiosepius|EU008983|Nagoya, Japan

*Idiosepius paradoxus*|Mollusca, Cephalopoda, Decapodiformes\_incertae\_sedis, Idiosepiidae, Idiosepius|EU008985|Nagoya, Japan

*Idiosepius paradoxus*|Mollusca, Cephalopoda, Decapodiformes\_incertae\_sedis, Idiosepiidae, Idiosepius|EU008988|Seto Inland Sea, Japan

*Idiosepius paradoxus*|Mollusca, Cephalopoda, Decapodiformes\_incertae\_sedis, Idiosepiidae, Idiosepius|EU008989|Seto Inland Sea, Japan

*Idiosepius paradoxus*|Mollusca, Cephalopoda, Decapodiformes\_incertae\_sedis, Idiosepiidae, Idiosepius|EU008990|Ushimado, Japan

*Idiosepius paradoxus*|Mollusca, Cephalopoda, Decapodiformes\_incertae\_sedis, Idiosepiidae, Idiosepius|EU008992|Ushimado, Japan

*Idiosepius paradoxus*|Mollusca, Cephalopoda, Decapodiformes\_incertae\_sedis, Idiosepiidae, Idiosepius|EU008993|Ushimado, Japan

*Idiosepius paradoxus*|Mollusca, Cephalopoda, Decapodiformes\_incertae\_sedis, Idiosepiidae, Idiosepius|EU008994|Ushimado, Japan

*Idiosepius paradoxus*|Mollusca, Cephalopoda, Decapodiformes\_incertae\_sedis, Idiosepiidae, Idiosepius|EU008996|Ushimado, Japan

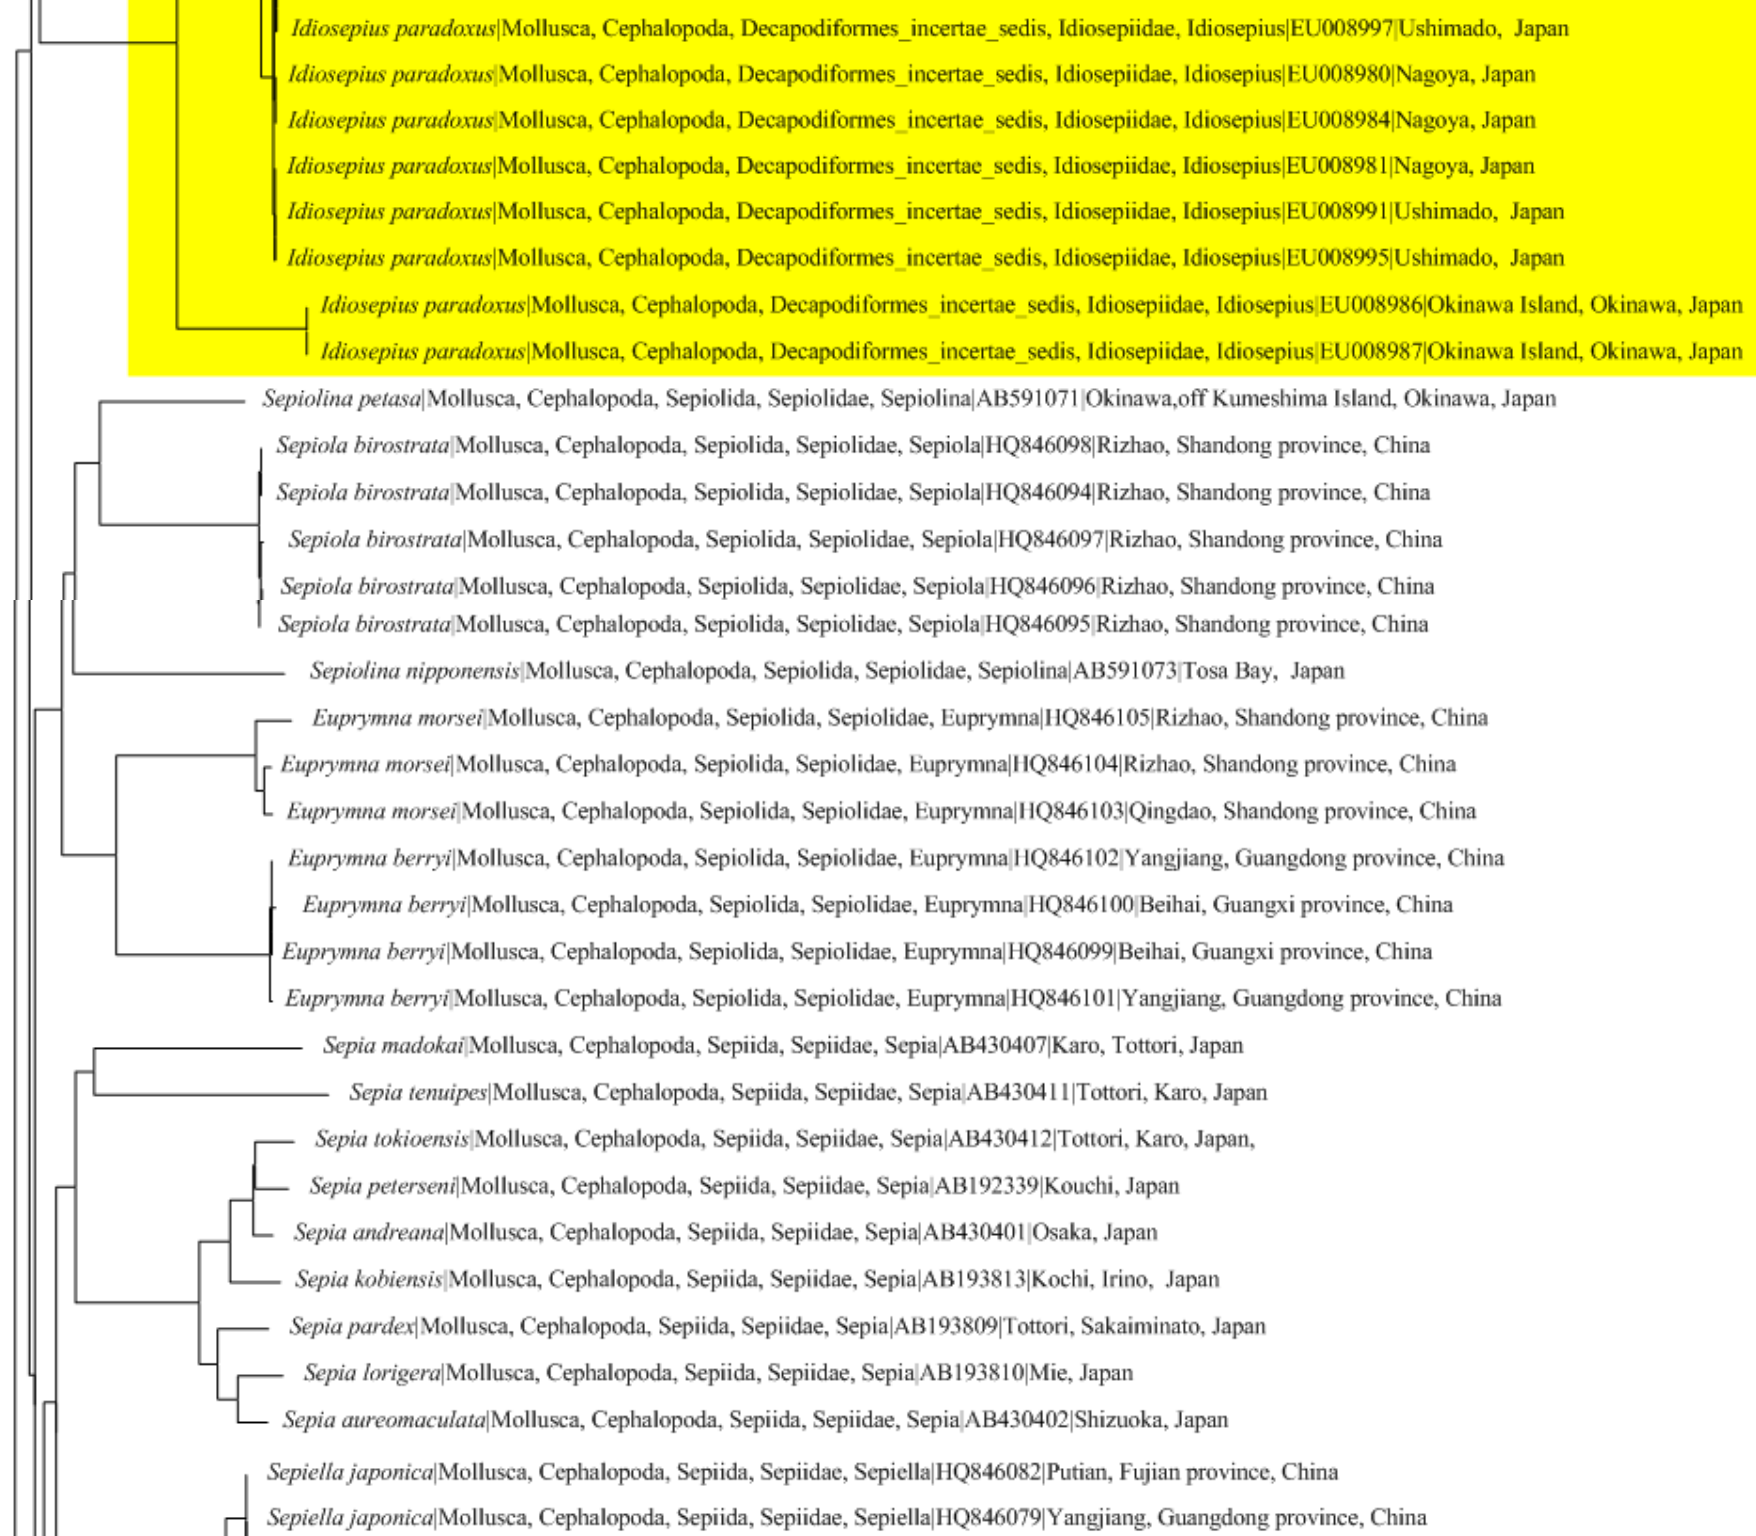

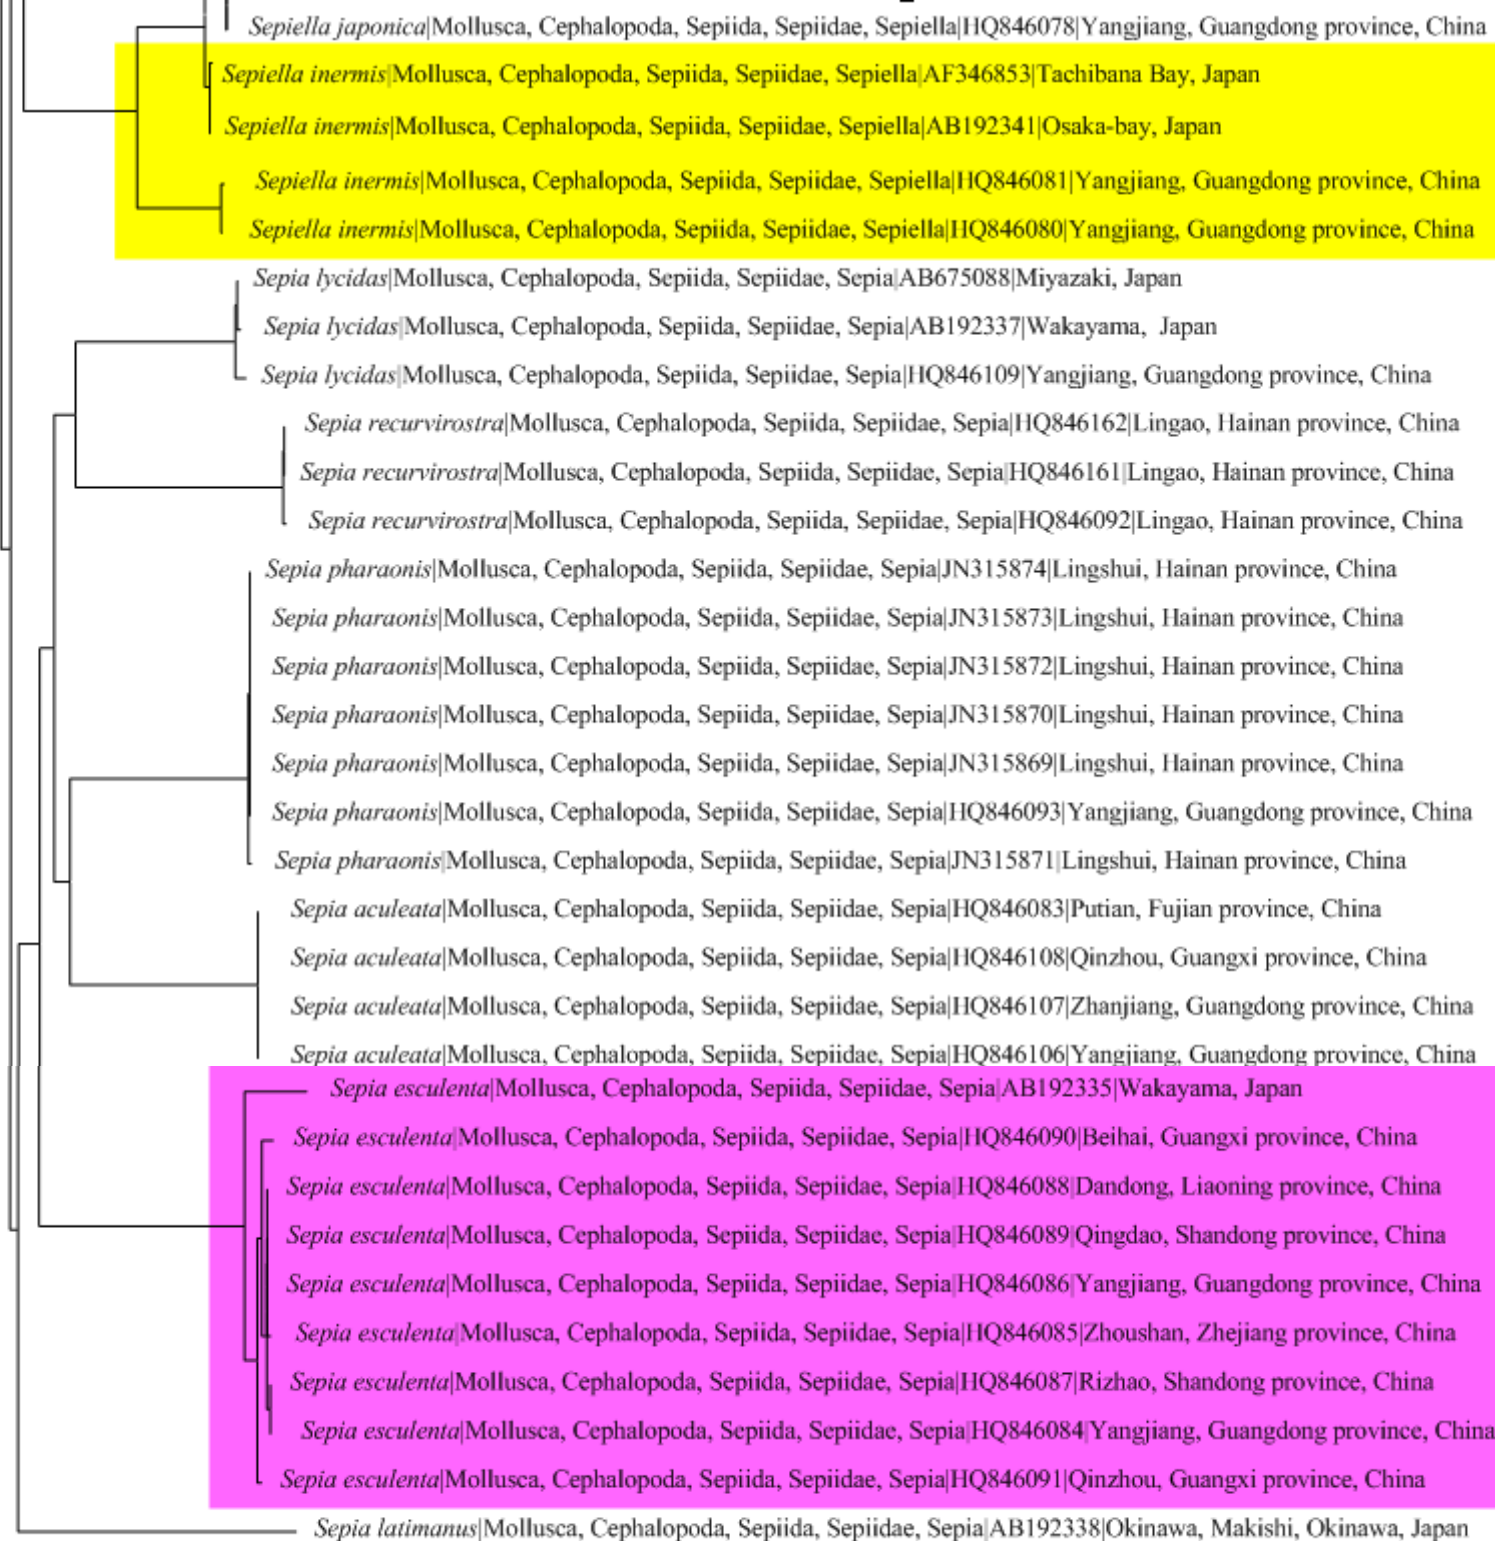

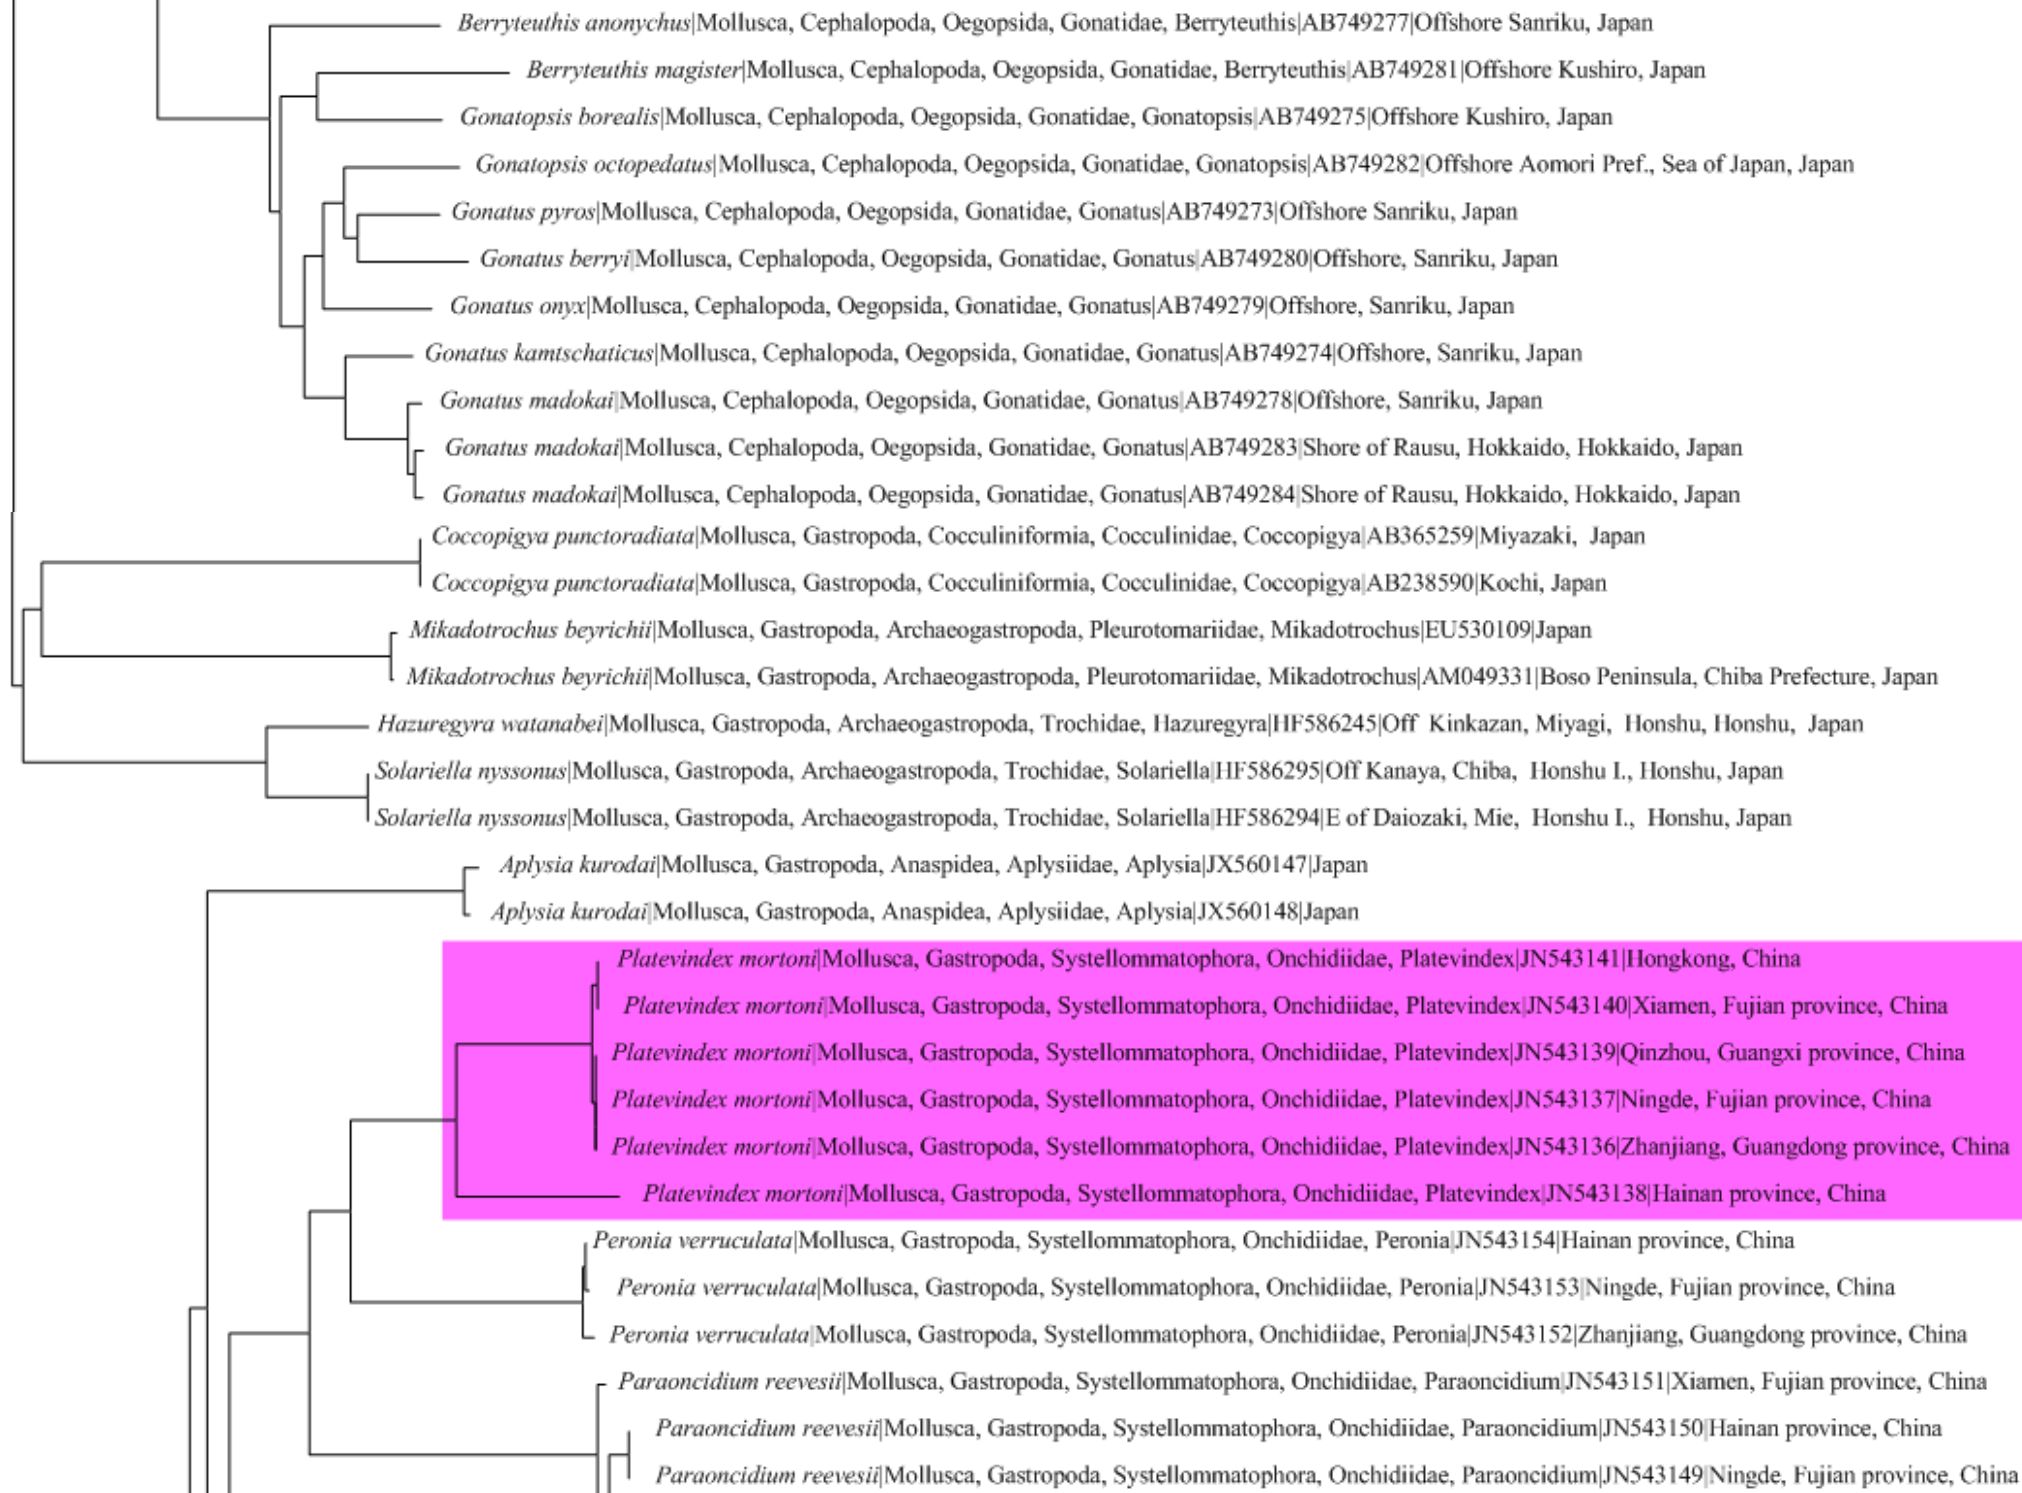

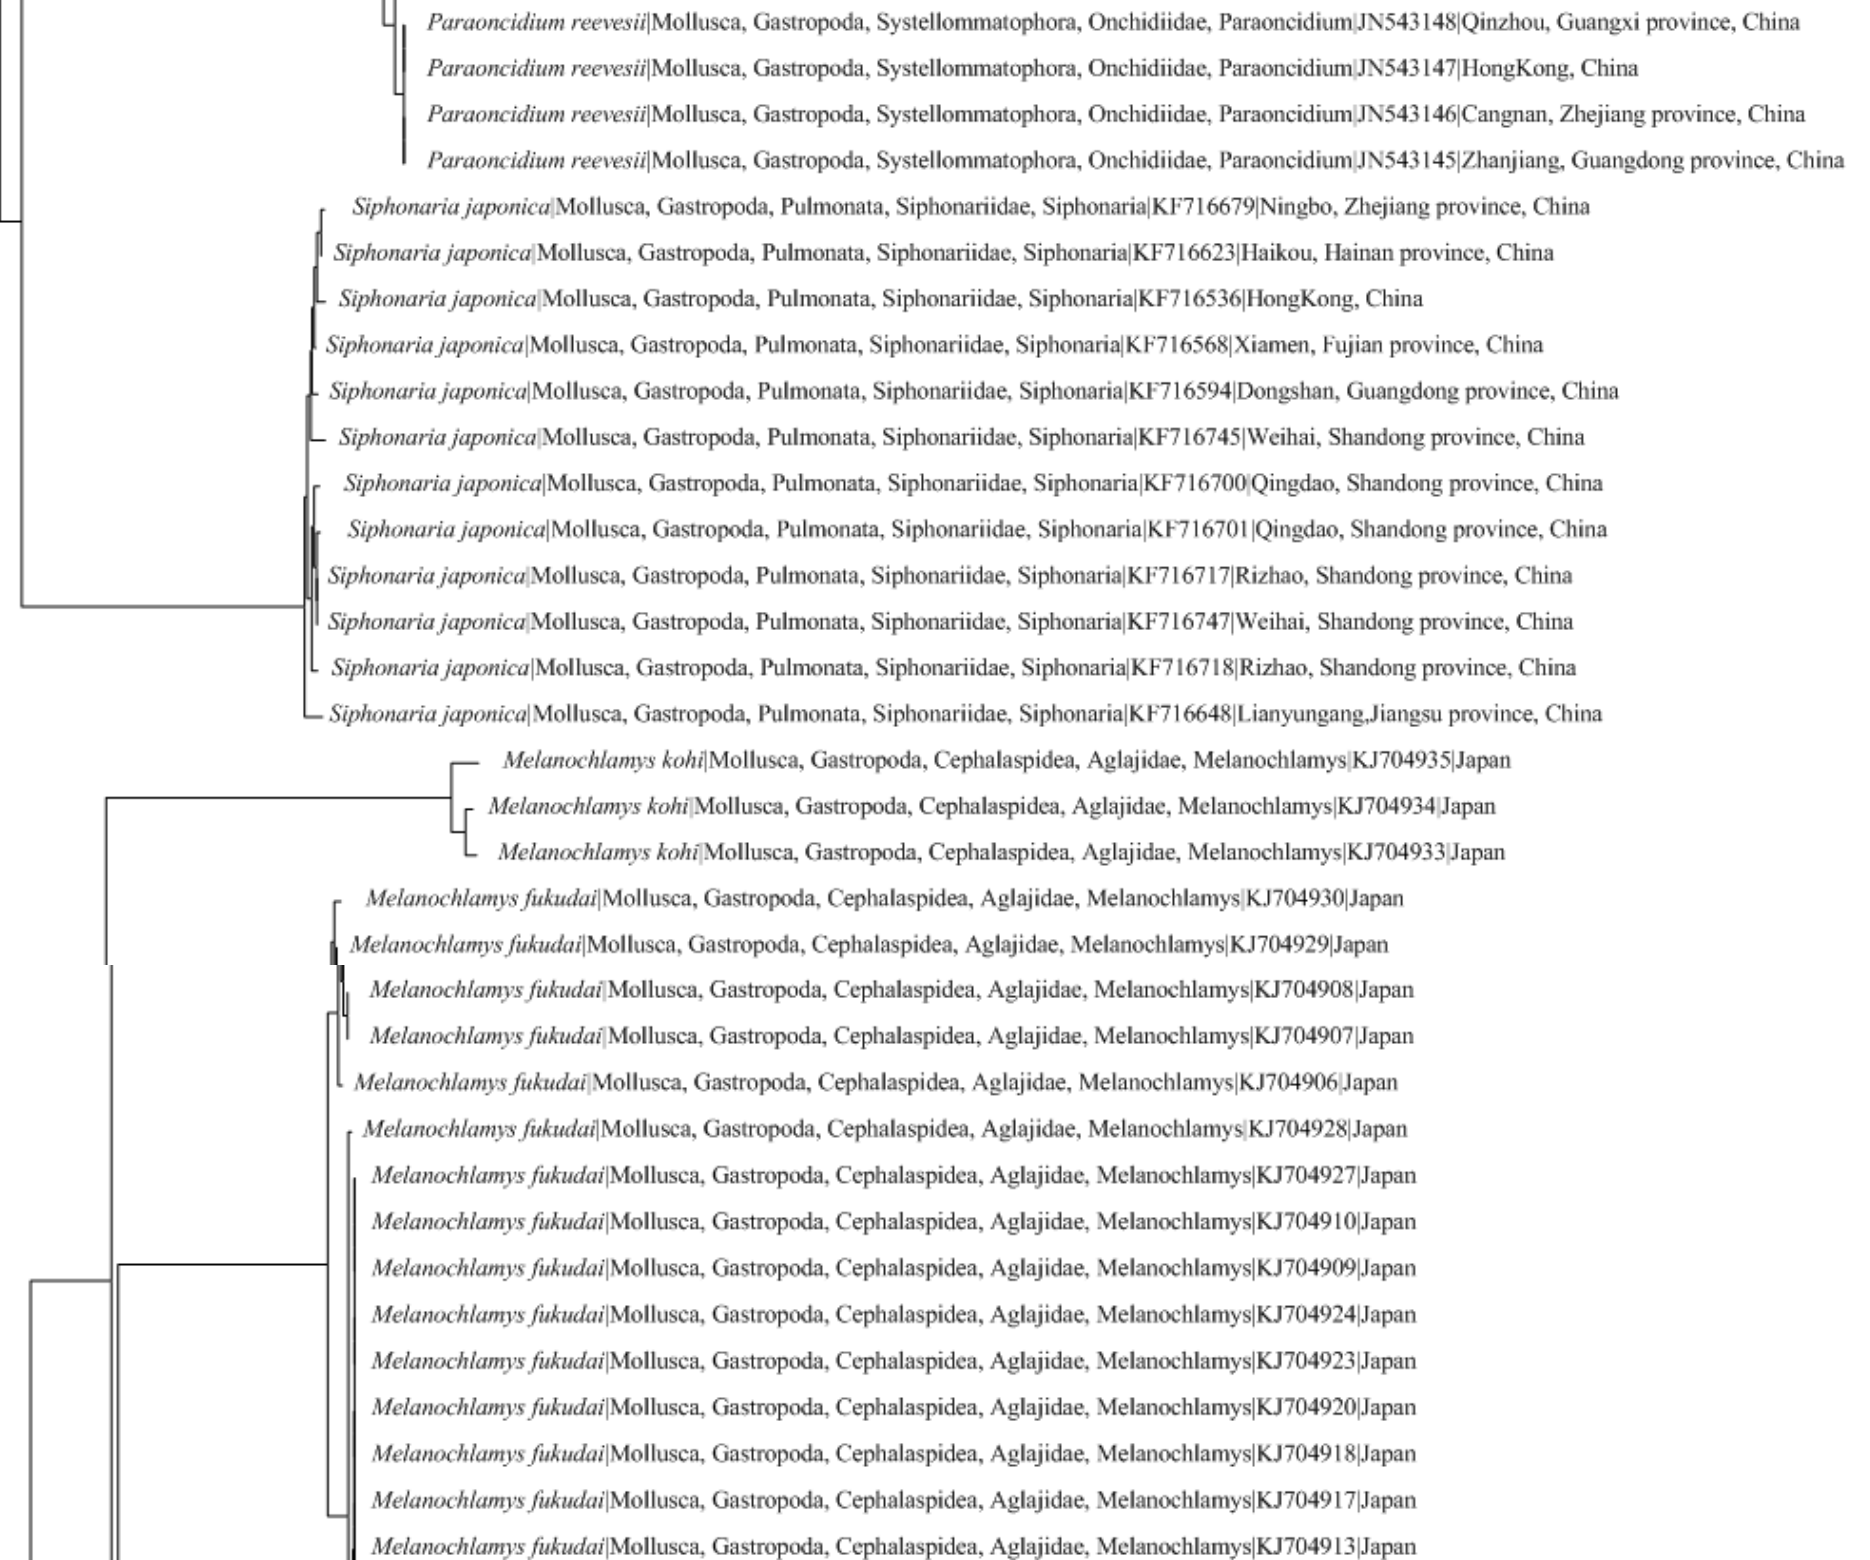





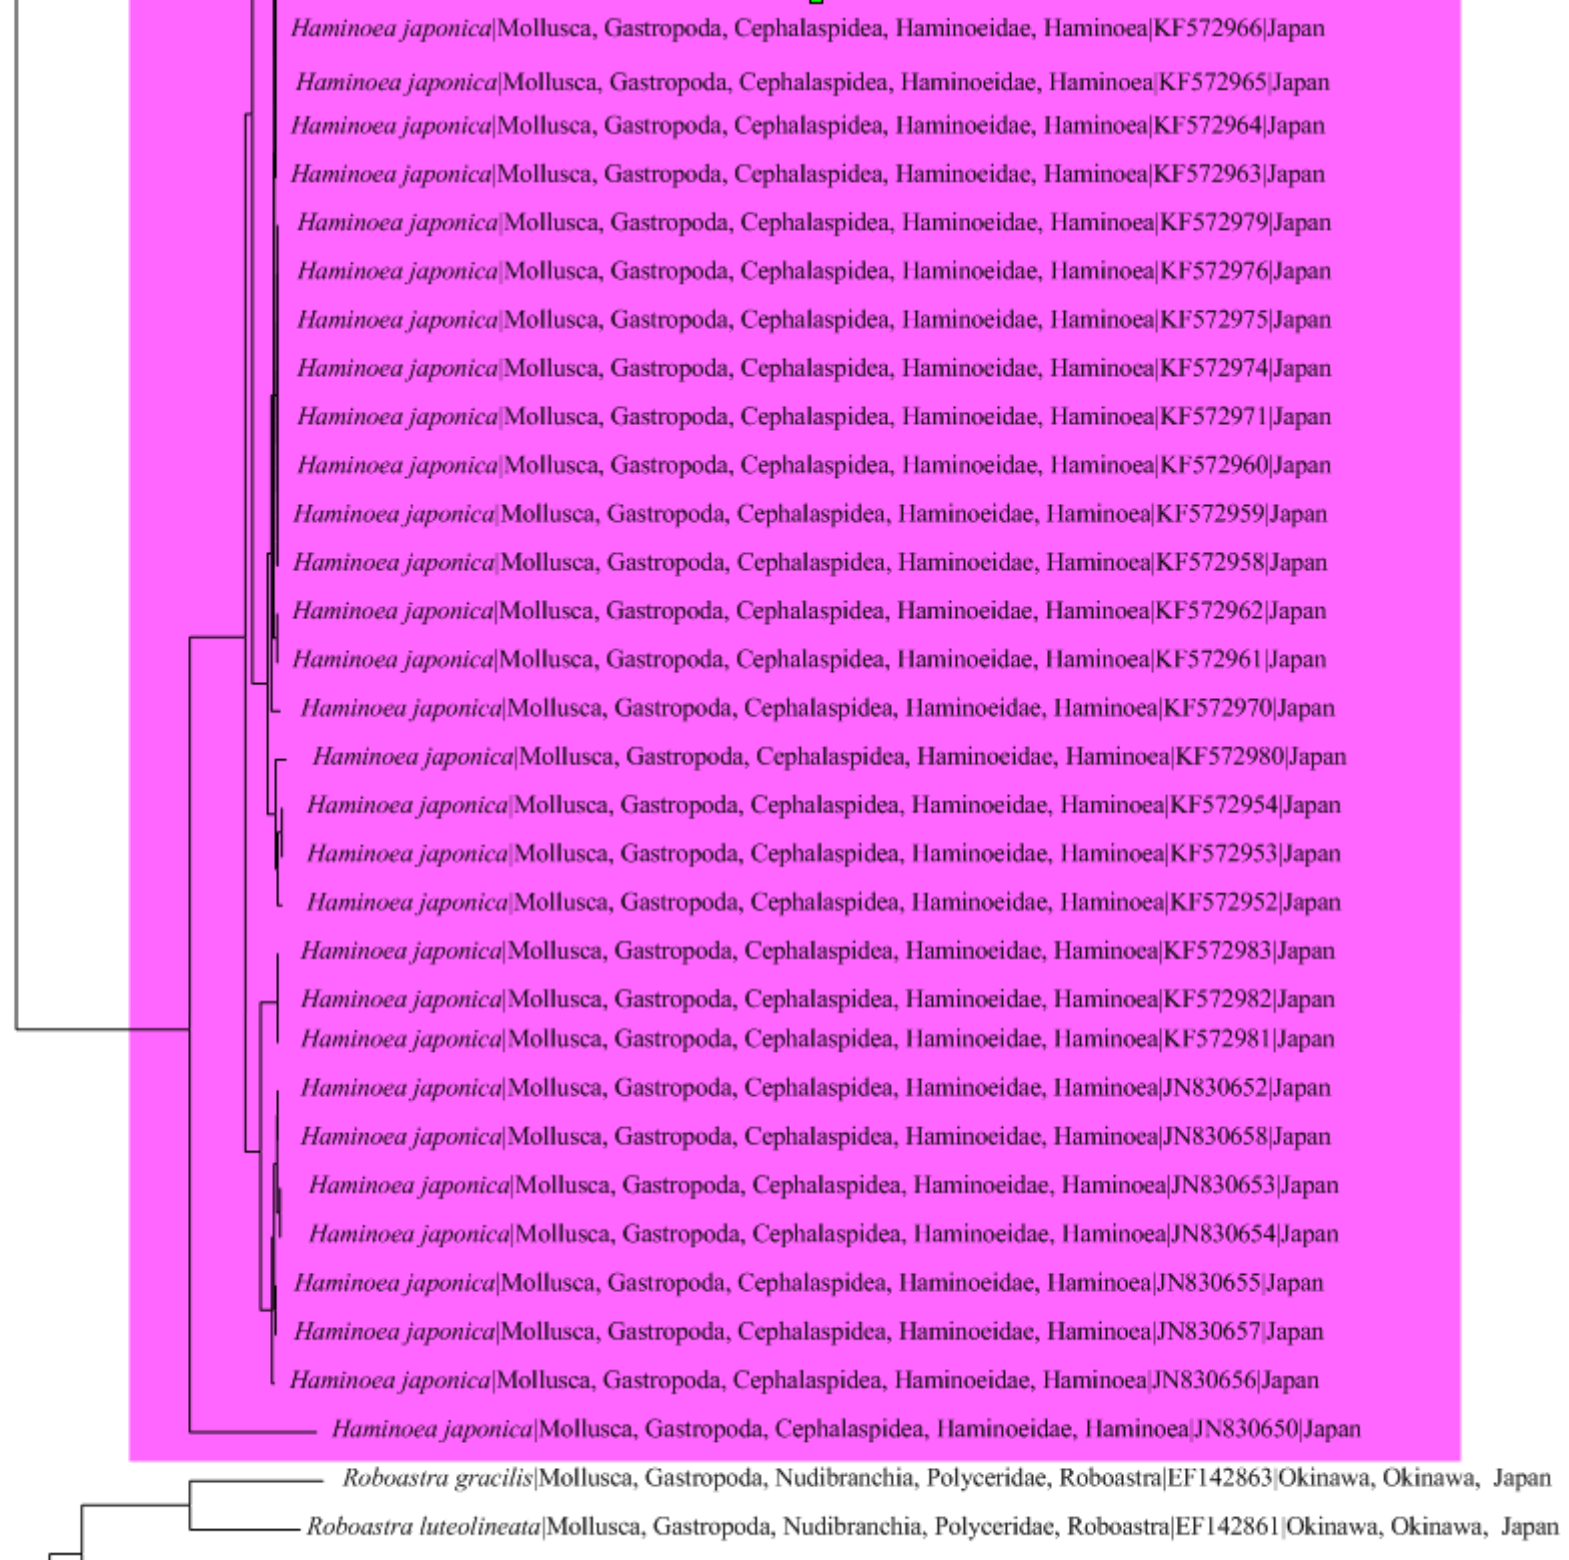

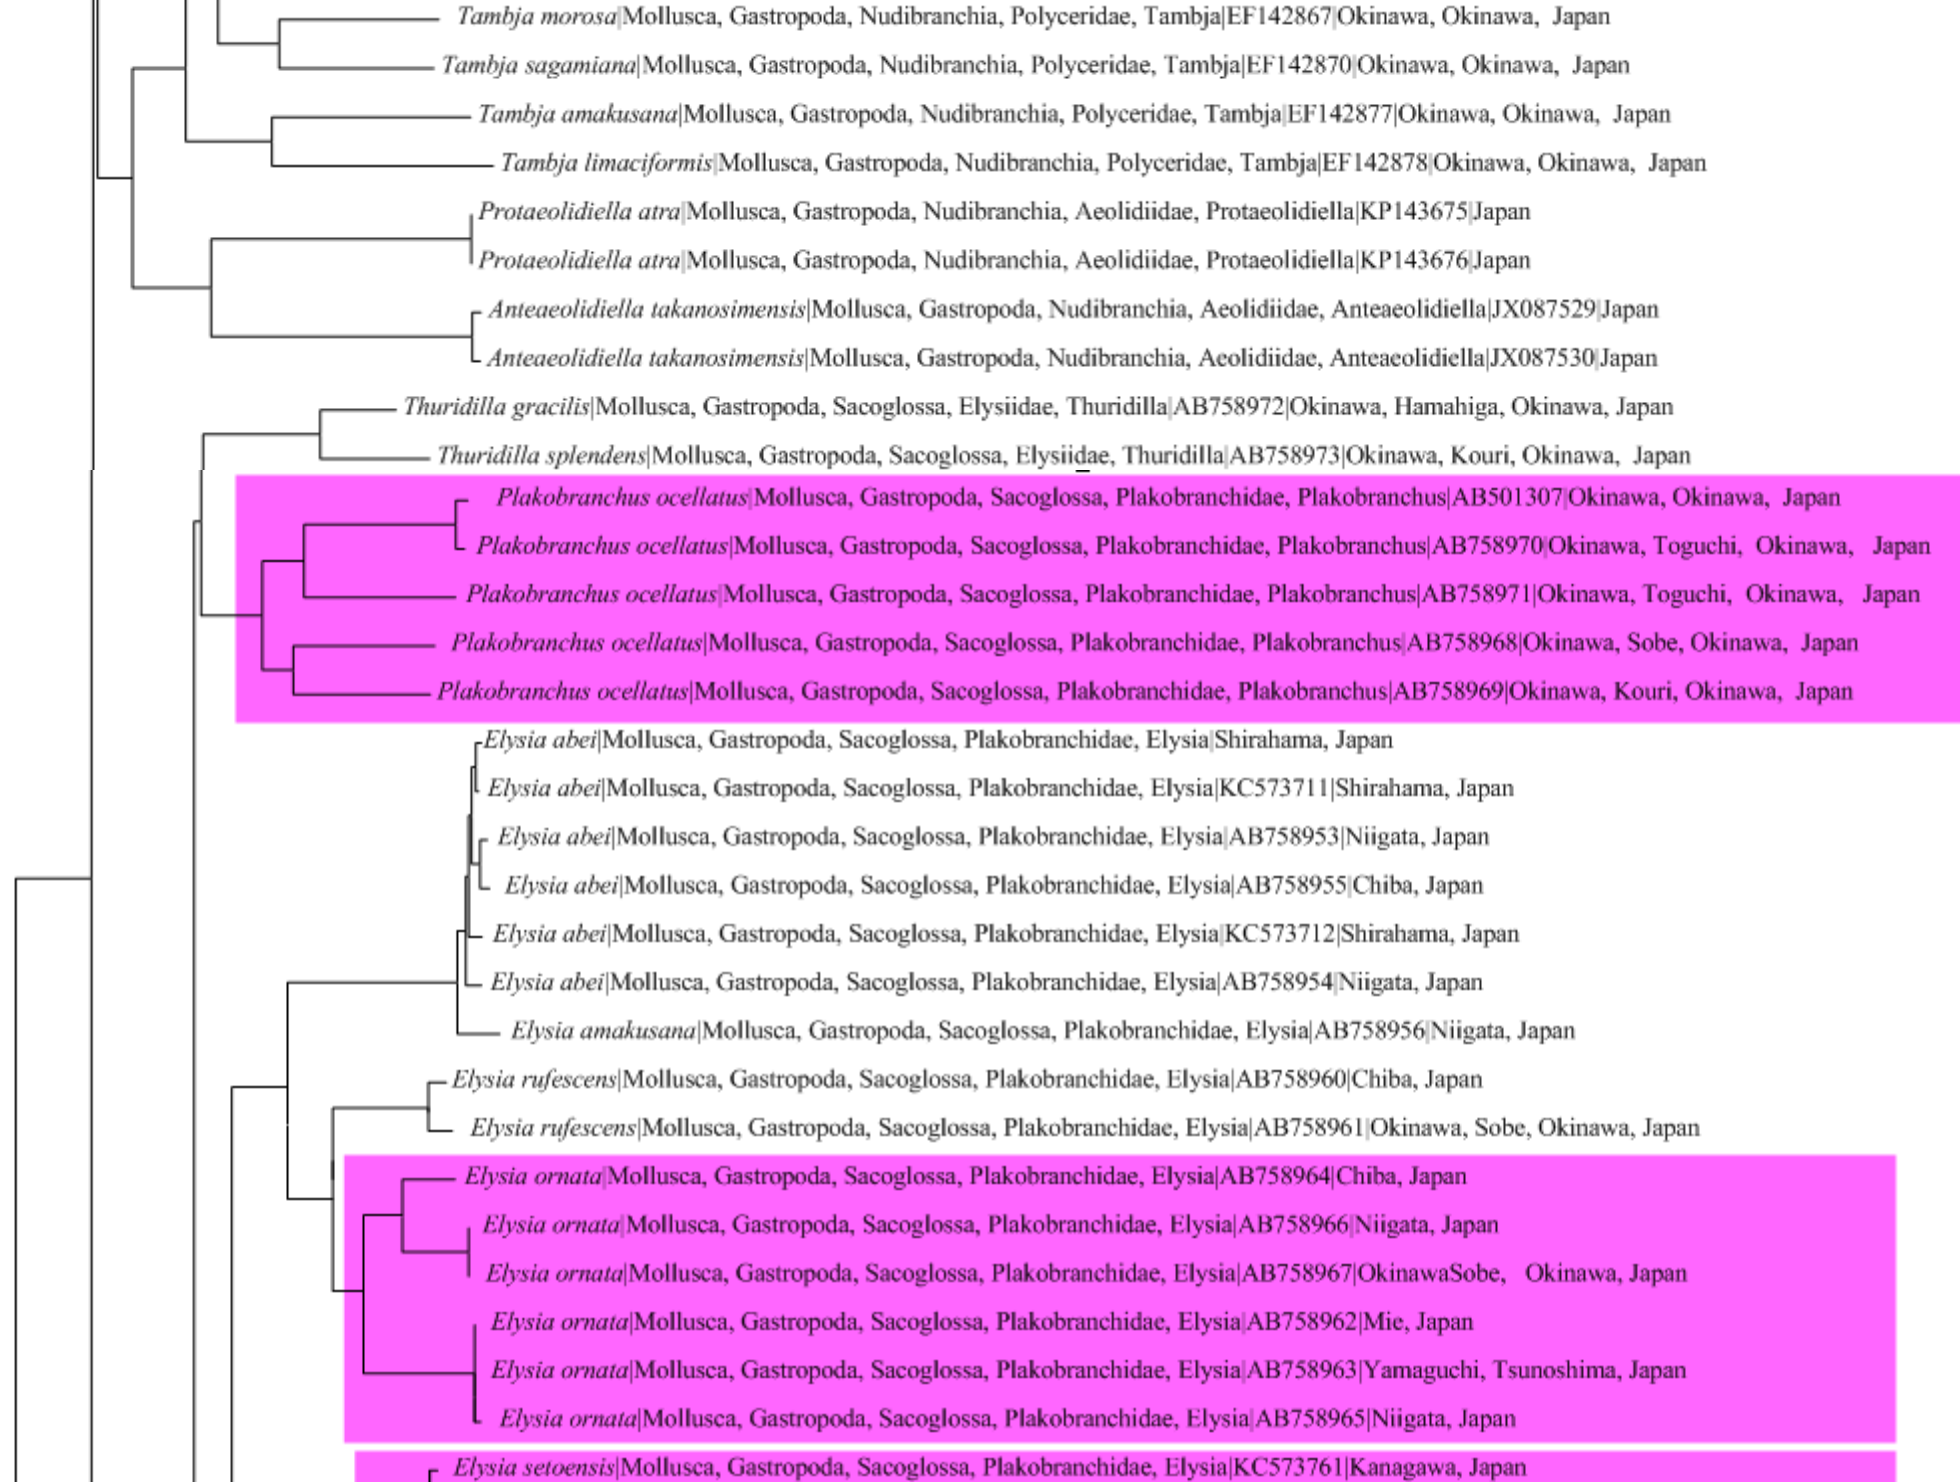

*Elysia atroviridis*[Mollusca, Gastropoda, Sacoglossa, Plakobanchidae, Elysia|AB758946|Oita, Japan  
*Elysia atroviridis*[Mollusca, Gastropoda, Sacoglossa, Plakobanchidae, Elysia|AB758909|Okayama, Japan  
*Elysia atroviridis*[Mollusca, Gastropoda, Sacoglossa, Plakobanchidae, Elysia|AB758930|Hiroshima, Mukaishima, Japan  
*Elysia atroviridis*[Mollusca, Gastropoda, Sacoglossa, Plakobanchidae, Elysia|AB758926|Hiroshima, Mukaishima, Japan  
*Elysia atroviridis*[Mollusca, Gastropoda, Sacoglossa, Plakobanchidae, Elysia|AB758921|Kanagawa, Misaki, Japan|Okayama, Japan  
*Elysia atroviridis*[Mollusca, Gastropoda, Sacoglossa, Plakobanchidae, Elysia|AB758912|Kanagawa, Misaki, Japan  
*Elysia atroviridis*[Mollusca, Gastropoda, Sacoglossa, Plakobanchidae, Elysia|AB758928|Hiroshima, Mukaishima, Japan  
*Elysia atroviridis*[Mollusca, Gastropoda, Sacoglossa, Plakobanchidae, Elysia|AB758947|Oita, Japan  
*Elysia atroviridis*[Mollusca, Gastropoda, Sacoglossa, Plakobanchidae, Elysia|AB758906|Okayama, Japan  
*Elysia atroviridis*[Mollusca, Gastropoda, Sacoglossa, Plakobanchidae, Elysia|AB758920|Okayama, Japan  
*Elysia atroviridis*[Mollusca, Gastropoda, Sacoglossa, Plakobanchidae, Elysia|AB758948|Oita, Japan  
*Elysia atroviridis*[Mollusca, Gastropoda, Sacoglossa, Plakobanchidae, Elysia|AB758905|Okayama, Japan  
*Elysia atroviridis*[Mollusca, Gastropoda, Sacoglossa, Plakobanchidae, Elysia|AB758938|Kanagawa, Misaki, Japan  
*Elysia atroviridis*[Mollusca, Gastropoda, Sacoglossa, Plakobanchidae, Elysia|AB758944|Yamaguchi, Tsunoshima, Japan,  
*Elysia atroviridis*[Mollusca, Gastropoda, Sacoglossa, Plakobanchidae, Elysia|AB758927|Hiroshima, Mukaishima, Japan  
*Elysia atroviridis*[Mollusca, Gastropoda, Sacoglossa, Plakobanchidae, Elysia|AB758922|Hiroshima, Mukaishima, Japan  
*Elysia atroviridis*[Mollusca, Gastropoda, Sacoglossa, Plakobanchidae, Elysia|AB758929|Hiroshima, Mukaishima, Japan  
*Elysia atroviridis*[Mollusca, Gastropoda, Sacoglossa, Plakobanchidae, Elysia|AB758949|Oita, Japan  
*Elysia atroviridis*[Mollusca, Gastropoda, Sacoglossa, Plakobanchidae, Elysia|AB758931|Okayama, Japan  
*Elysia atroviridis*[Mollusca, Gastropoda, Sacoglossa, Plakobanchidae, Elysia|AB758945|Yamaguchi, Tsunoshima, Japan,  
*Elysia atroviridis*[Mollusca, Gastropoda, Sacoglossa, Plakobanchidae, Elysia|AB758936|Kanagawa, Misaki, Japan  
*Elysia atroviridis*[Mollusca, Gastropoda, Sacoglossa, Plakobanchidae, Elysia|KC573760|Choshi, Japan  
*Elysia atroviridis*[Mollusca, Gastropoda, Sacoglossa, Plakobanchidae, Elysia|AB758908|Okayama, Japan  
*Elysia atroviridis*[Mollusca, Gastropoda, Sacoglossa, Plakobanchidae, Elysia|AB758933|Okayama, Japan  
*Elysia atroviridis*[Mollusca, Gastropoda, Sacoglossa, Plakobanchidae, Elysia|AB758935|Chiba, Japan  
*Elysia atroviridis*[Mollusca, Gastropoda, Sacoglossa, Plakobanchidae, Elysia|AB758943|Kanagawa, Misaki, Japan  
*Elysia atroviridis*[Mollusca, Gastropoda, Sacoglossa, Plakobanchidae, Elysia|AB758915|Okayama, Japan  
*Elysia atroviridis*[Mollusca, Gastropoda, Sacoglossa, Plakobanchidae, Elysia|AB758918|Okayama, Japan  
*Elysia atroviridis*[Mollusca, Gastropoda, Sacoglossa, Plakobanchidae, Elysia|AB758923|Hiroshima, Fukuyama, Japan  
*Elysia atroviridis*[Mollusca, Gastropoda, Sacoglossa, Plakobanchidae, Elysia|AB758932|Okayama, Japan  
*Elysia atroviridis*[Mollusca, Gastropoda, Sacoglossa, Plakobanchidae, Elysia|AB758907|Okayama, Japan  
*Elysia atroviridis*[Mollusca, Gastropoda, Sacoglossa, Plakobanchidae, Elysia|AB758937|Kanagawa, Misaki, Japan  
*Elysia atroviridis*[Mollusca, Gastropoda, Sacoglossa, Plakobanchidae, Elysia|AB758913|Kanagawa, Misaki, Japan

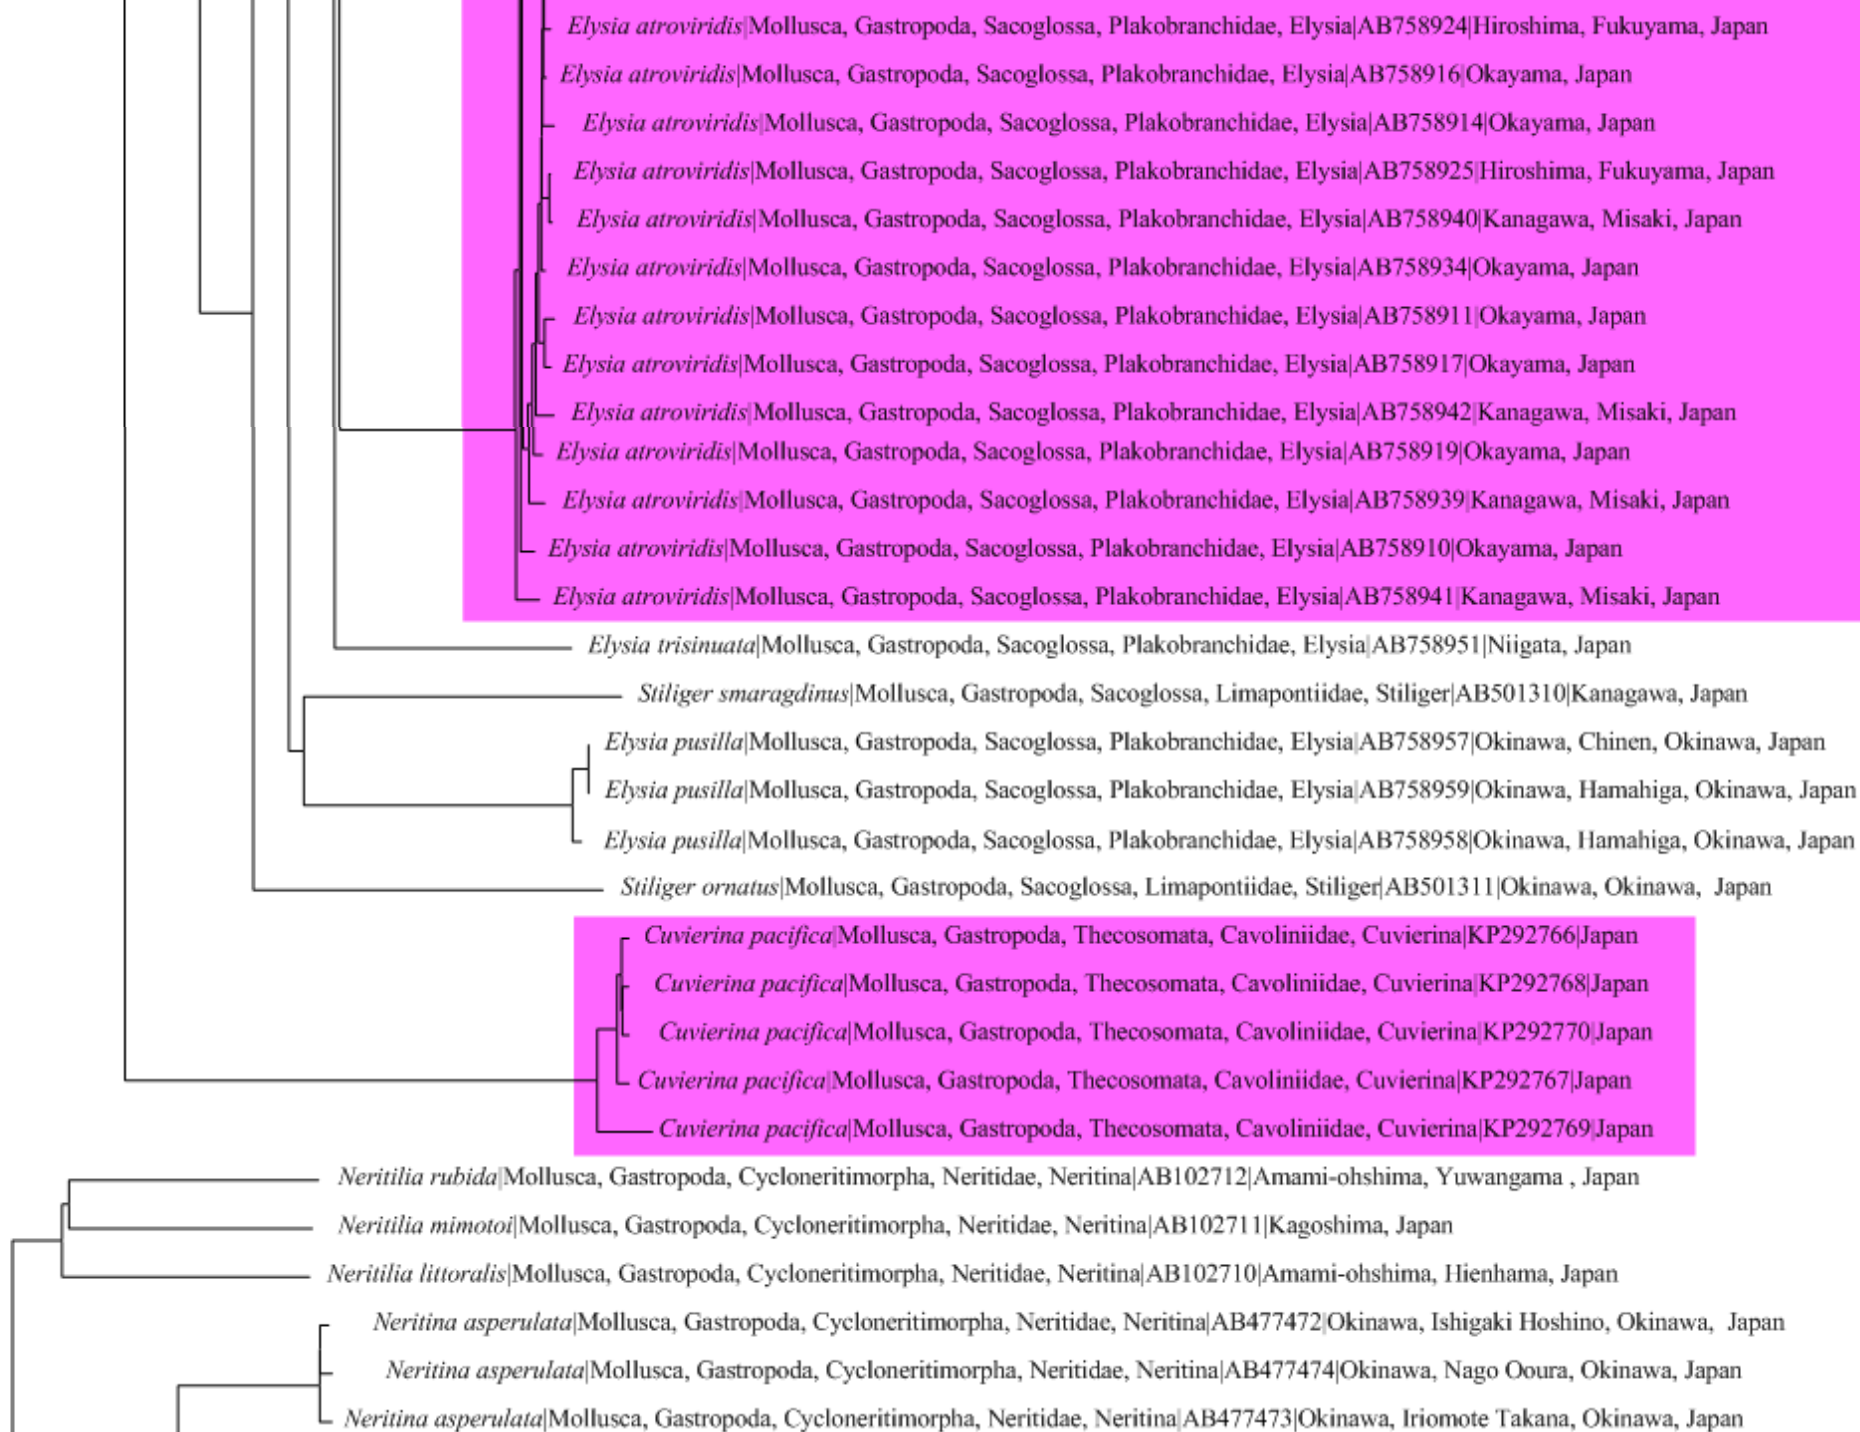

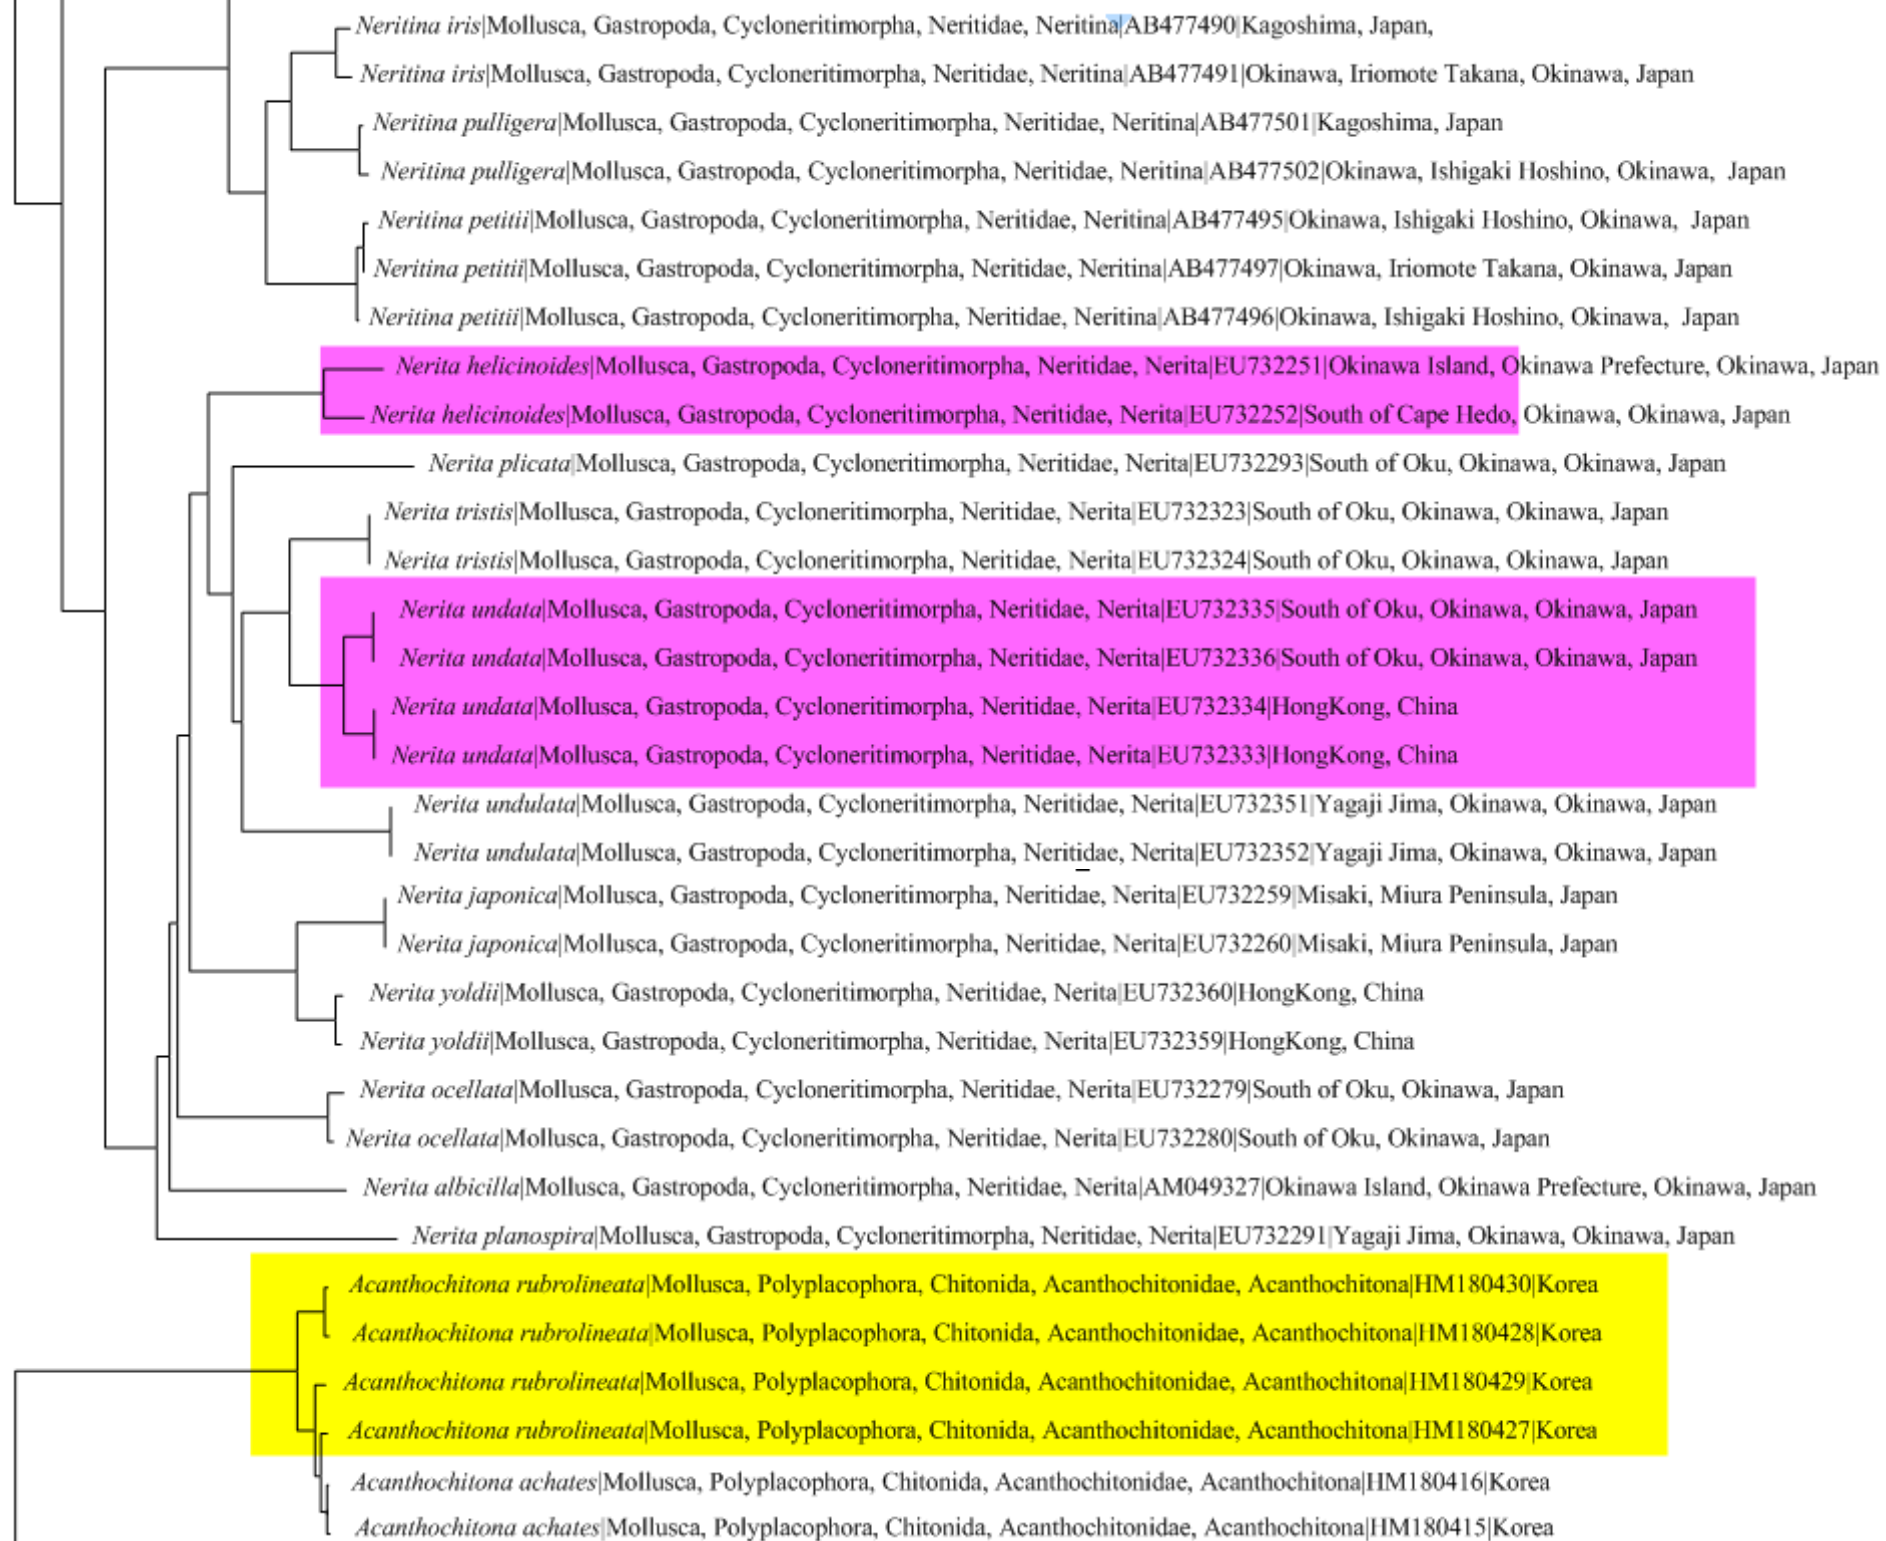

*Acanthochitona defilippi*|Mollusca, Polyplacophora, Chitonida, Acanthochitonidae, Acanthochitona|HM180422|Korea  
*Acanthochitona defilippi*|Mollusca, Polyplacophora, Chitonida, Acanthochitonidae, Acanthochitona|HM180421|Korea  
*Acanthochitona defilippi*|Mollusca, Polyplacophora, Chitonida, Acanthochitonidae, Acanthochitona|HM180417|Korea  
*Acanthochitona defilippi*|Mollusca, Polyplacophora, Chitonida, Acanthochitonidae, Acanthochitona|HM180418|Korea  
*Acanthochitona defilippi*|Mollusca, Polyplacophora, Chitonida, Acanthochitonidae, Acanthochitona|HM180420|Korea  
*Acanthochitona defilippi*|Mollusca, Polyplacophora, Chitonida, Acanthochitonidae, Acanthochitona|HM180419|Korea

*Cantharus melanostomus*|Mollusca, Gastropoda, Neogastropoda, Buccinidae, Cantharus|JN053038|Sanya, Hainan province, China

*Cantharus melanostomus*|Mollusca, Gastropoda, Neogastropoda, Buccinidae, Cantharus|HQ834062|Sanya, Hainan province, China

*Cantharus cecillei*|Mollusca, Gastropoda, Neogastropoda, Buccinidae, Cantharus|HQ834063|Fangchenggang, Guangxi province, China

*Cantharus cecillei*|Mollusca, Gastropoda, Neogastropoda, Buccinidae, Cantharus|JN053007|Fangchenggang, Guangxi province, China

*Hemifusus ternatanus*|Mollusca, Gastropoda, Neogastropoda, Melongenidae, Hemifusus|HM180609|Korea

*Hemifusus ternatanus*|Mollusca, Gastropoda, Neogastropoda, Melongenidae, Hemifusus|JN053017|Lianyungang, Jiangsu province, China

*Hemifusus ternatanus*|Mollusca, Gastropoda, Neogastropoda, Melongenidae, Hemifusus|JN053014|Lianyungang, Jiangsu province, China

*Hemifusus ternatanus*|Mollusca, Gastropoda, Neogastropoda, Melongenidae, Hemifusus|JN053015|Lianyungang, Jiangsu province, China

*Hemifusus ternatanus*|Mollusca, Gastropoda, Neogastropoda, Melongenidae, Hemifusus|JN053016|Lianyungang, Jiangsu province, China

*Hemifusus ternatanus*|Mollusca, Gastropoda, Neogastropoda, Melongenidae, Hemifusus|HQ834067|Lianyungang, Jiangsu province, China

*Hemifusus ternatanus*|Mollusca, Gastropoda, Neogastropoda, Melongenidae, Hemifusus|HM180608|Korea

*Hemifusus ternatanus*|Mollusca, Gastropoda, Neogastropoda, Melongenidae, Hemifusus|HM180607|Korea

*Hemifusus colosseus*|Mollusca, Gastropoda, Neogastropoda, Melongenidae, Hemifusus|HQ834068|Beihai, Guangxi province, China

*Hemifusus colosseus*|Mollusca, Gastropoda, Neogastropoda, Melongenidae, Hemifusus|JN053018|Beihai, Guangxi province, China

*Hemifusus tuba*|Mollusca, Gastropoda, Neogastropoda, Melongenidae, Hemifusus|JN053019|Zhanjiang, Guangdong province, China

*Hemifusus tuba*|Mollusca, Gastropoda, Neogastropoda, Melongenidae, Hemifusus|JN053023|Zhanjiang, Guangdong province, China

*Hemifusus tuba*|Mollusca, Gastropoda, Neogastropoda, Melongenidae, Hemifusus|HQ834069|Zhanjiang, Guangdong province, China

*Hemifusus tuba*|Mollusca, Gastropoda, Neogastropoda, Melongenidae, Hemifusus|JN053020|Zhanjiang, Guangdong province, China

*Hemifusus tuba*|Mollusca, Gastropoda, Neogastropoda, Melongenidae, Hemifusus|JN053021|Zhanjiang, Guangdong province, China

*Hemifusus tuba*|Mollusca, Gastropoda, Neogastropoda, Melongenidae, Hemifusus|JN053022|Zhanjiang, Guangdong province, China

*Hemifusus tuba*|Mollusca, Gastropoda, Neogastropoda, Melongenidae, Hemifusus|HQ834070|Beihai, Guangxi province, China

*Hemifusus tuba*|Mollusca, Gastropoda, Neogastropoda, Melongenidae, Hemifusus|JN053024|Zhanjiang, Guangdong province, China

*Neptunea cumingi*|Mollusca, Gastropoda, Neogastropoda, Buccinidae, Neptunea|HM180716|Korea

*Neptunea cumingi*|Mollusca, Gastropoda, Neogastropoda, Buccinidae, Neptunea|HM180715|Korea

*Neptunea cumingi*|Mollusca, Gastropoda, Neogastropoda, Buccinidae, Neptunea|JN053005|Qingdao, Shandong province, China

*Neptunea cumingi*|Mollusca, Gastropoda, Neogastropoda, Buccinidae, Neptunea|JN053006|Qingdao, Shandong province, China

*Neptunea cumingii*|Mollusca, Gastropoda, Neogastropoda, Buccinidae, Neptunea|HQ834061|Qingdao, Shandong province, China

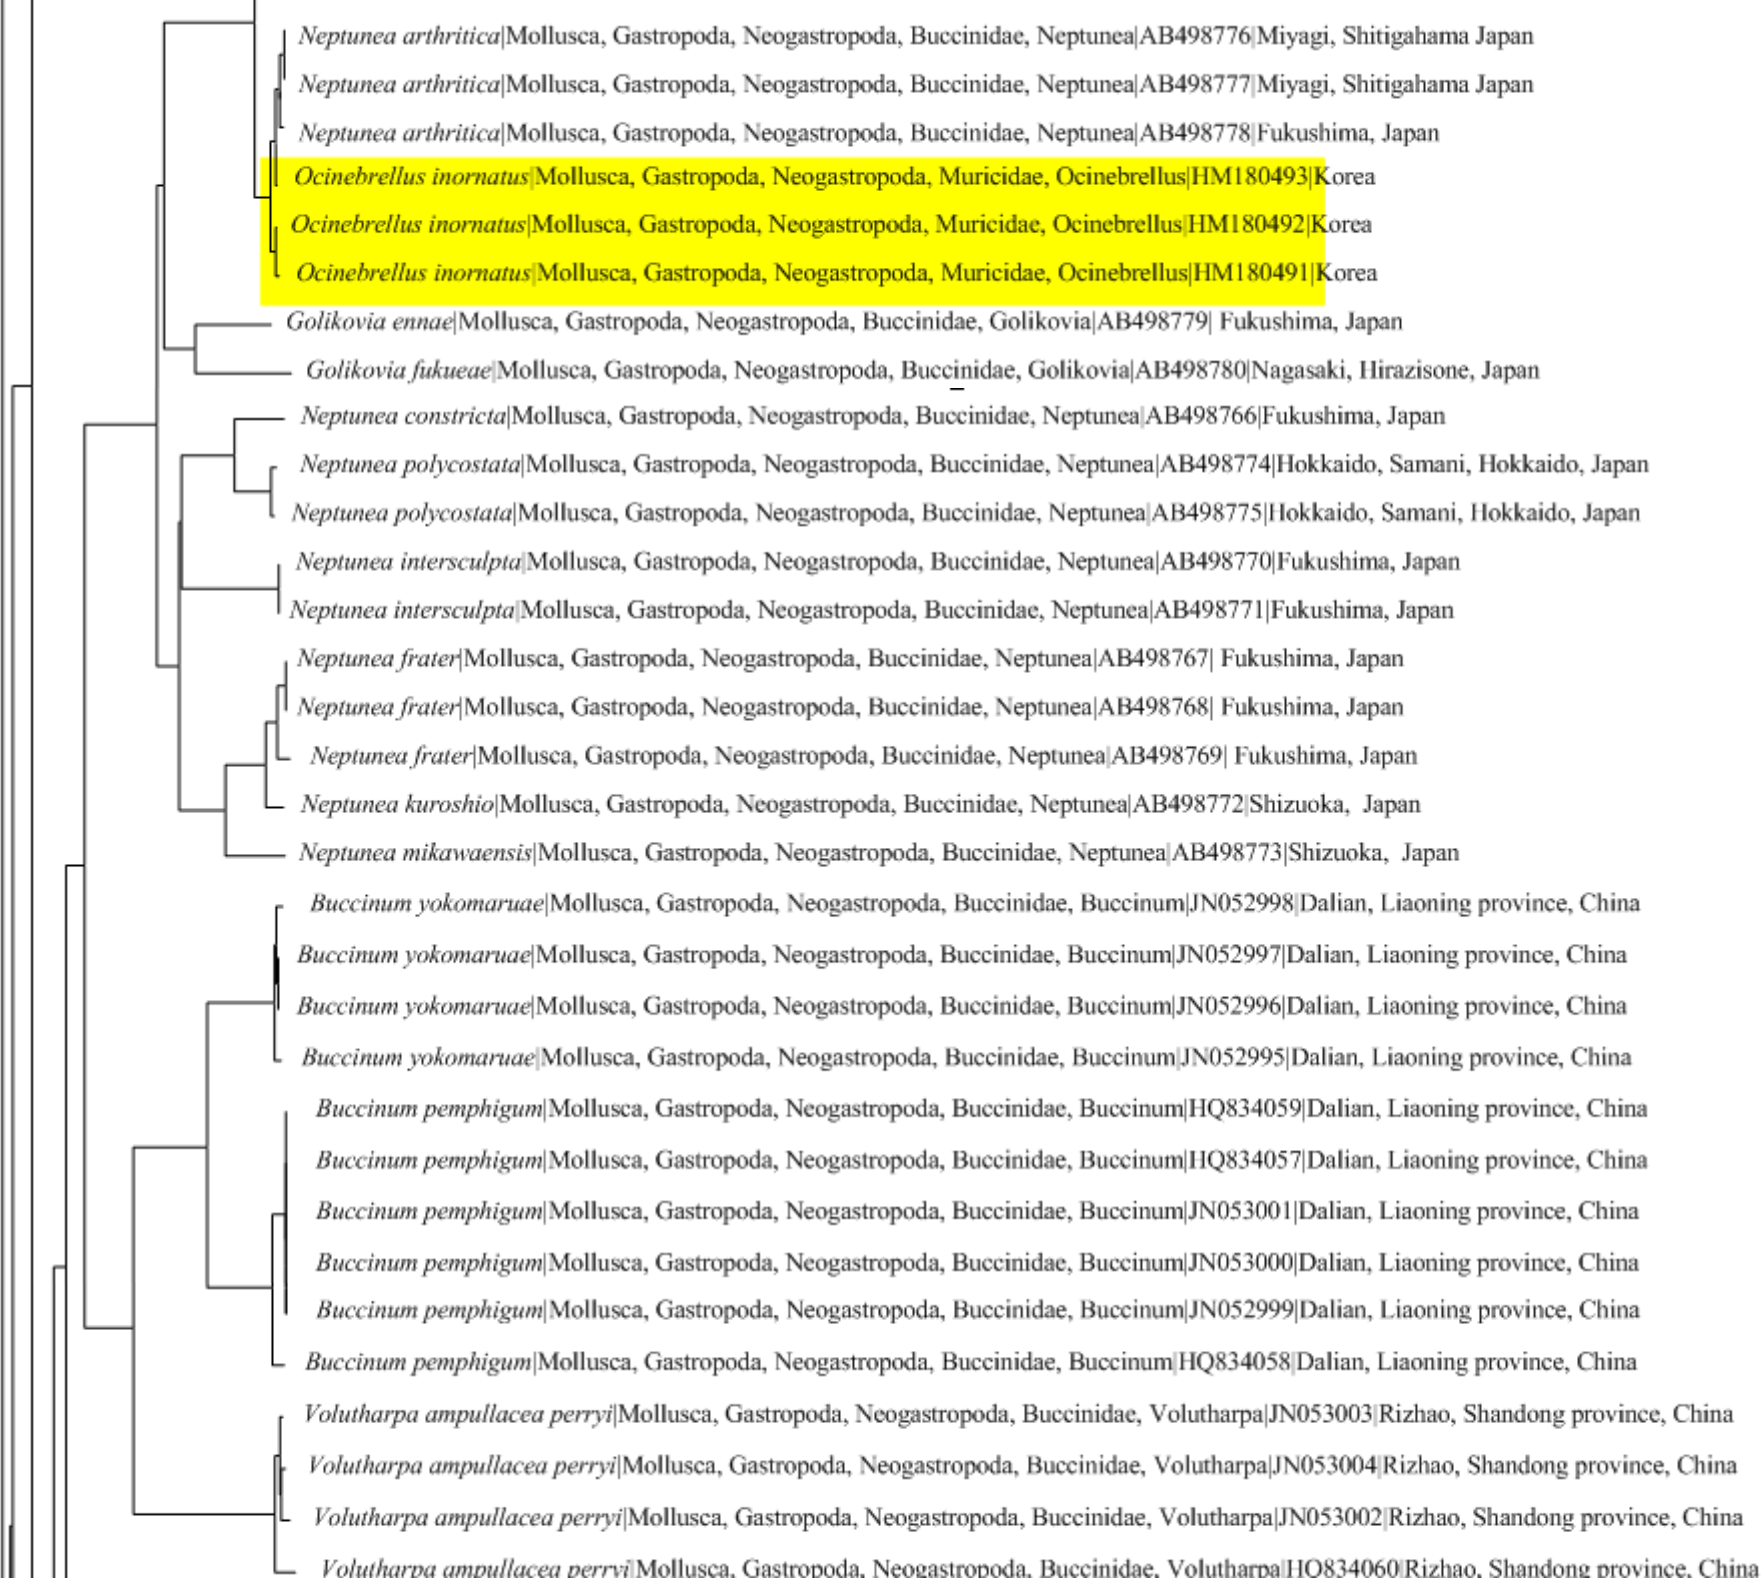

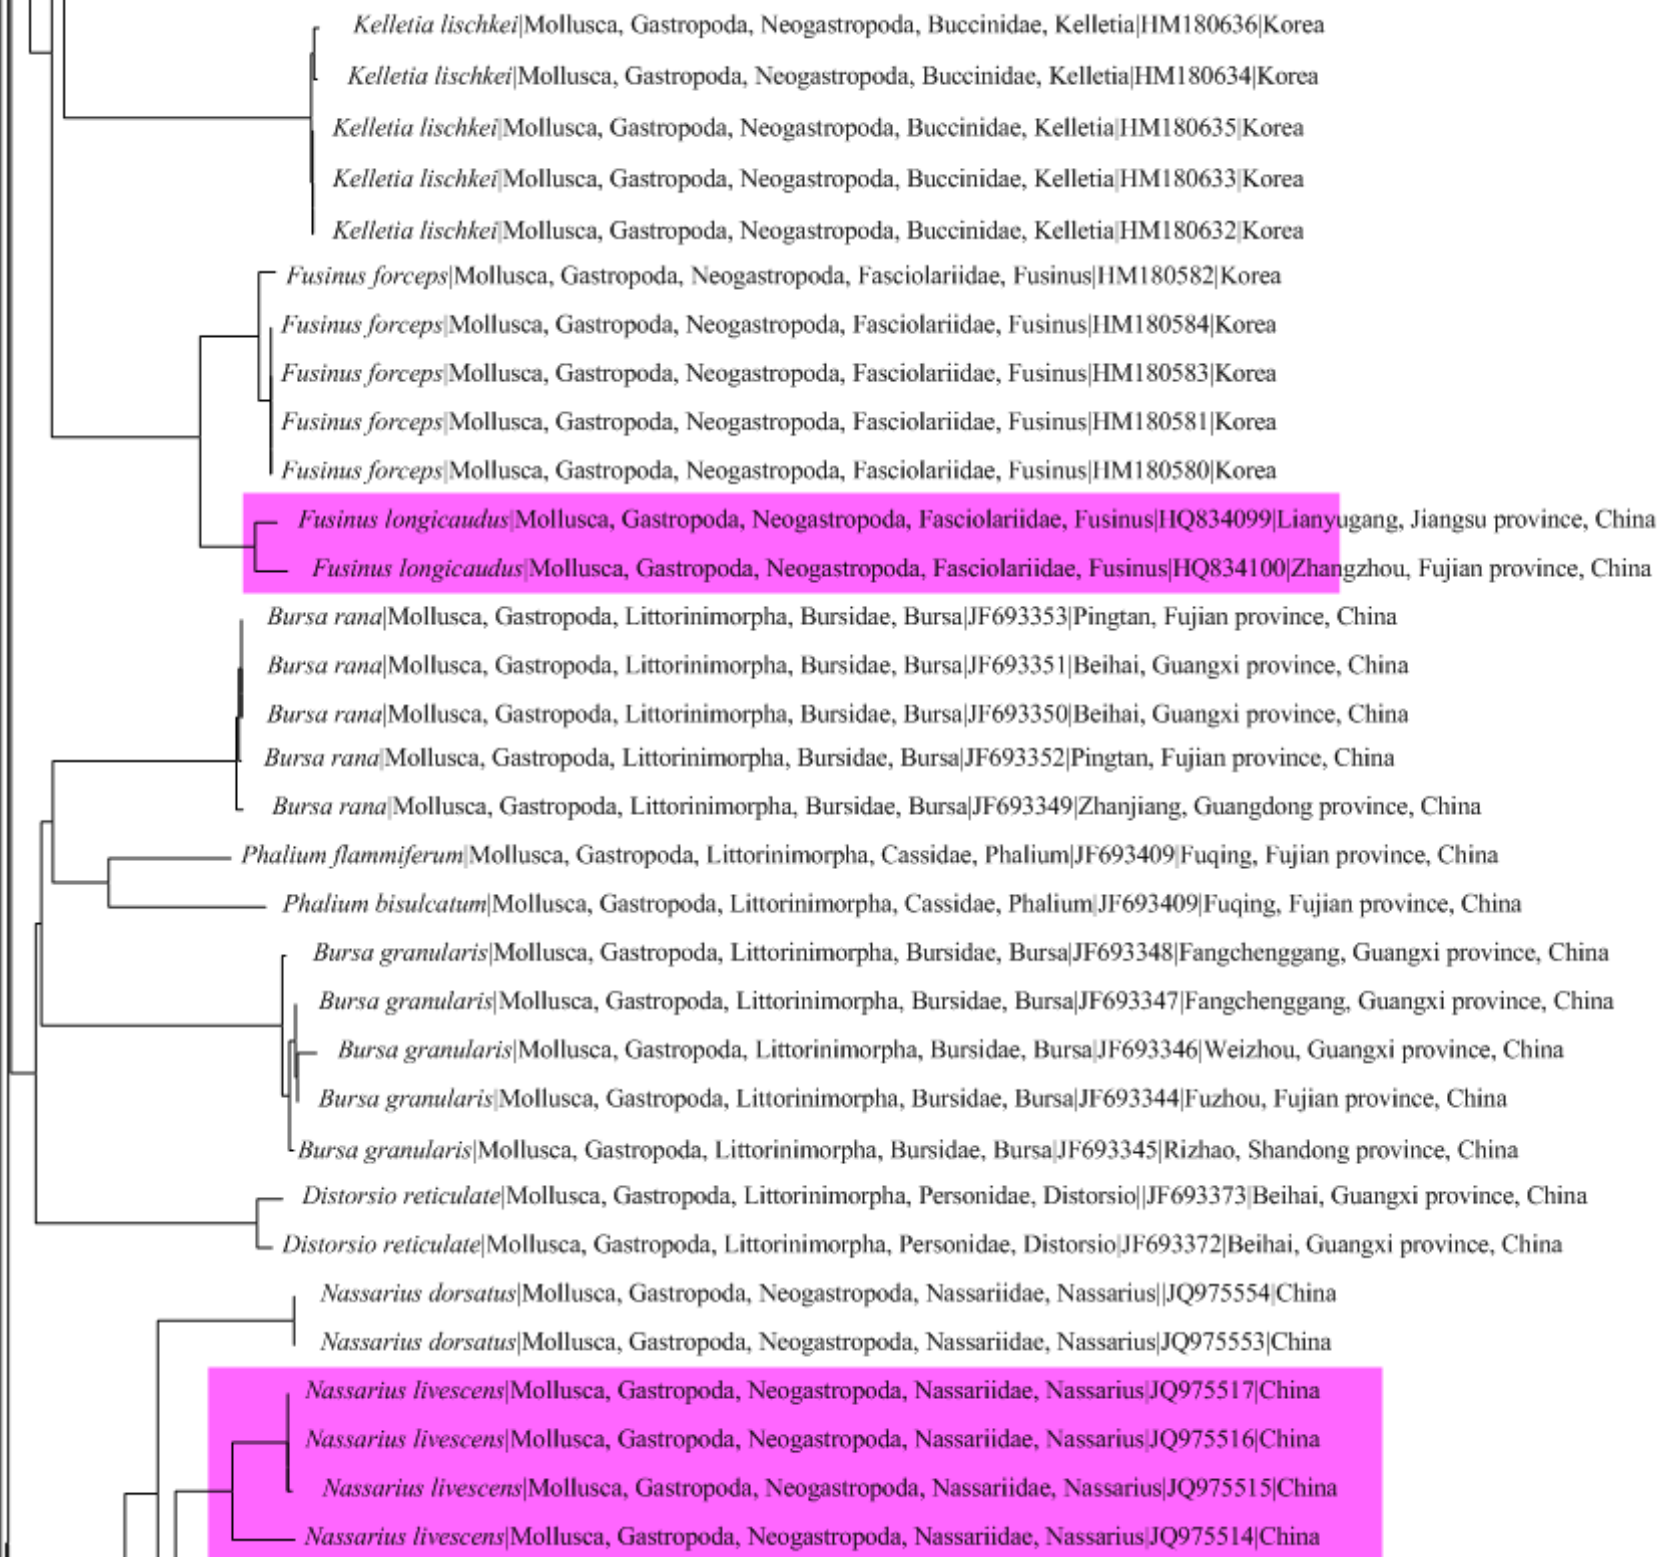



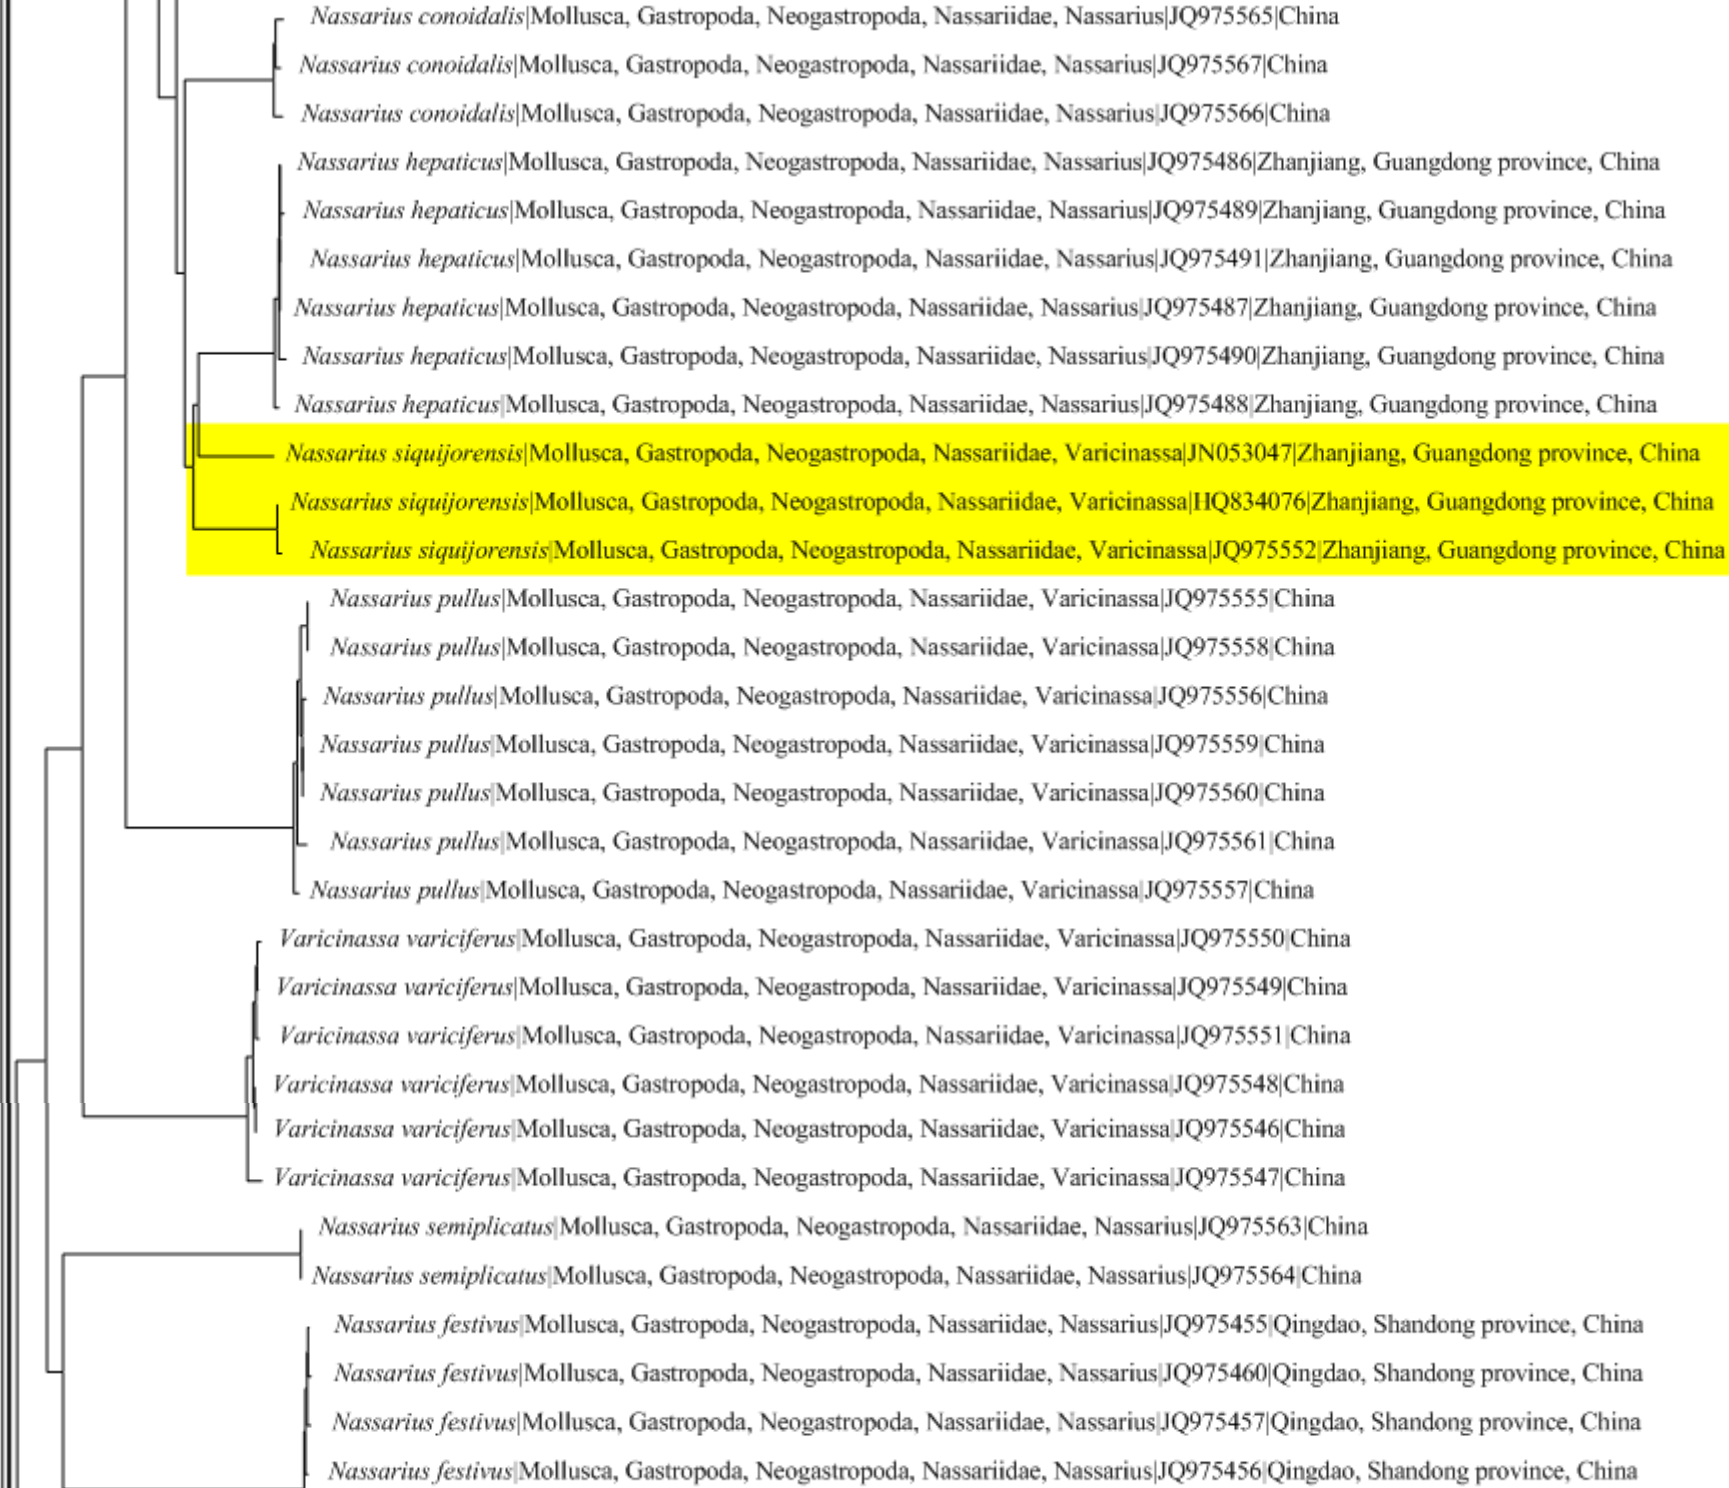

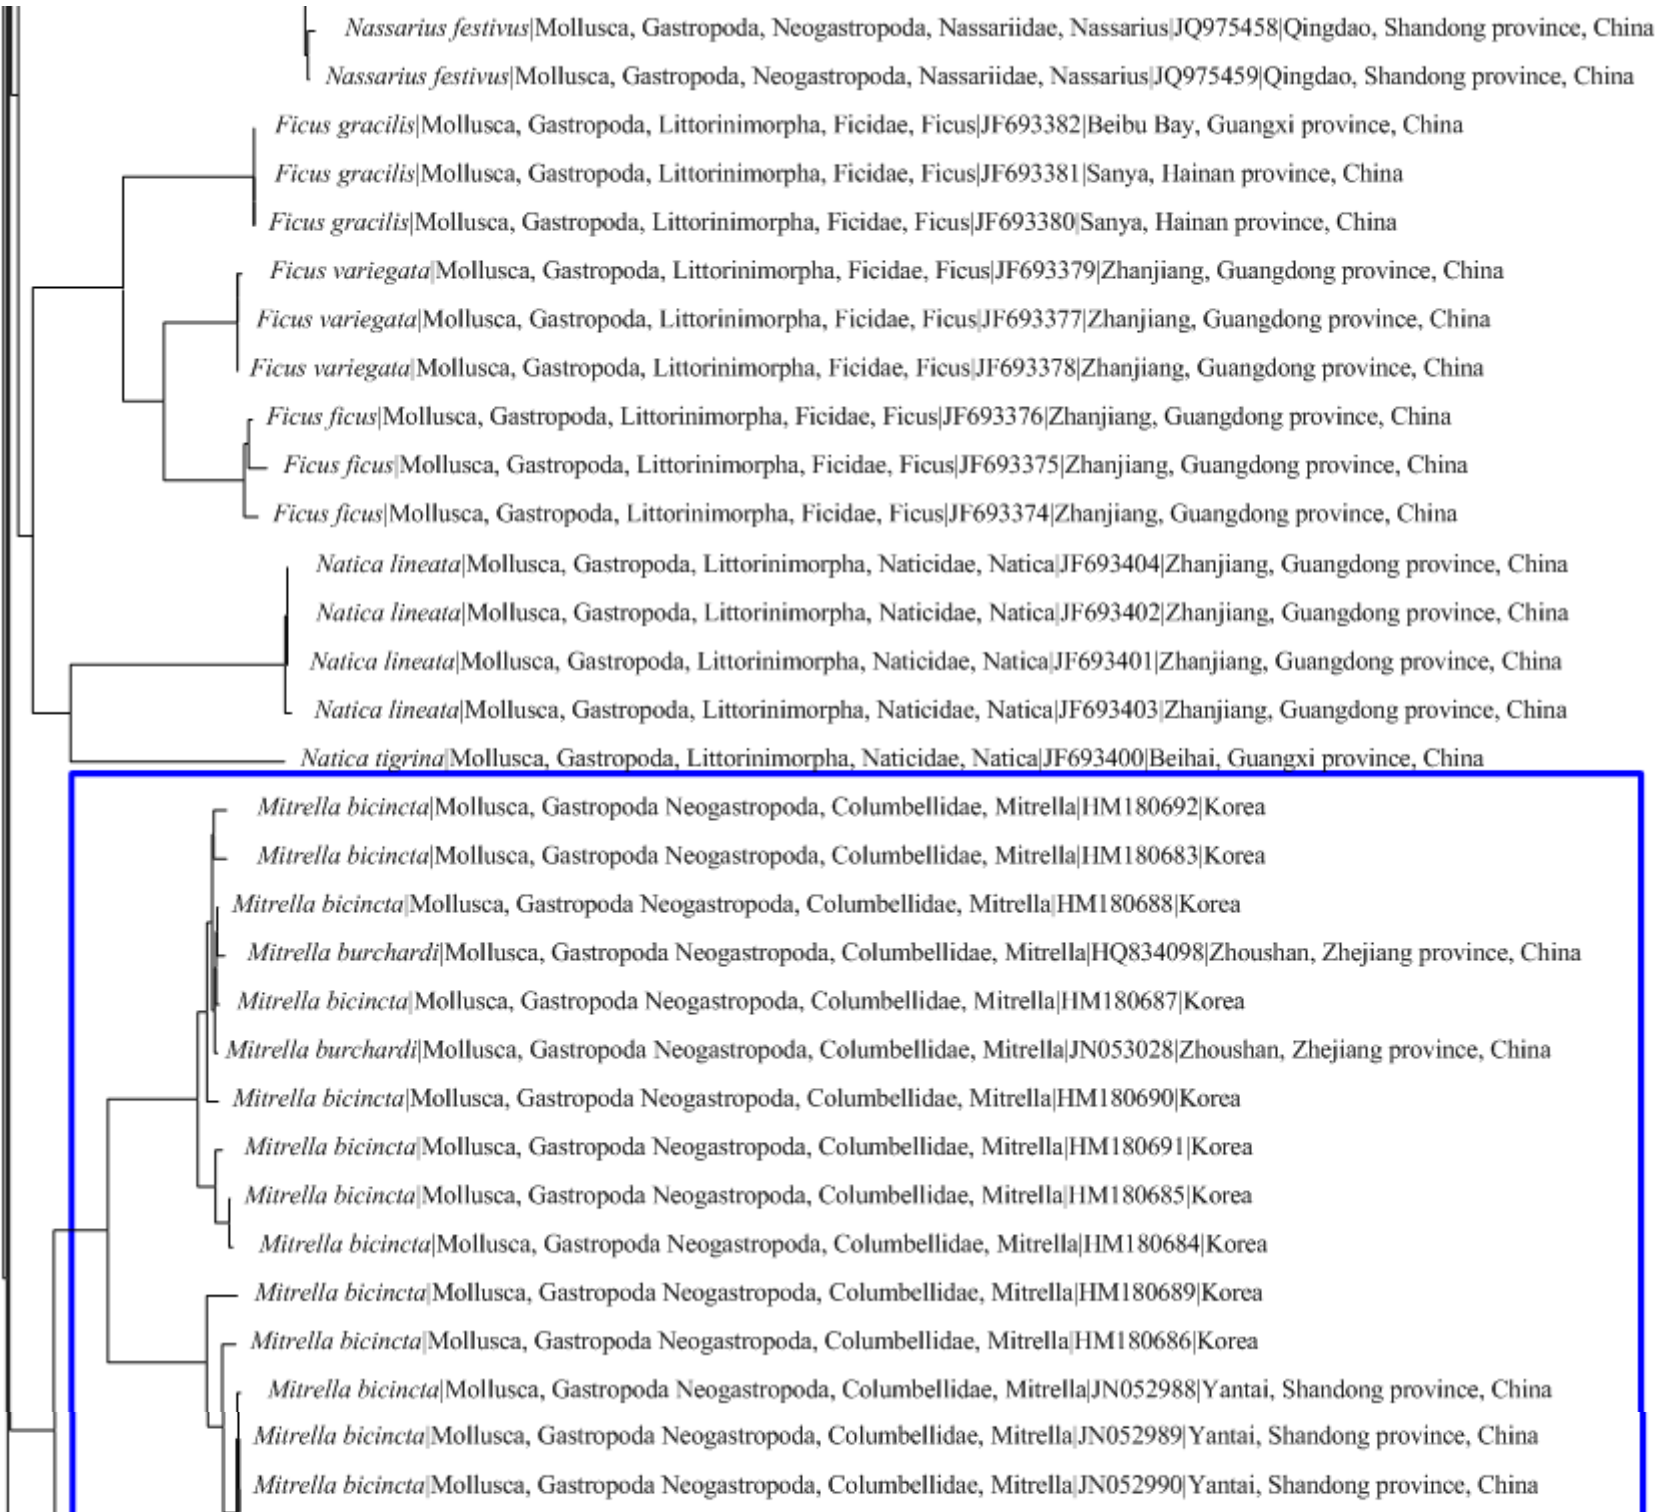

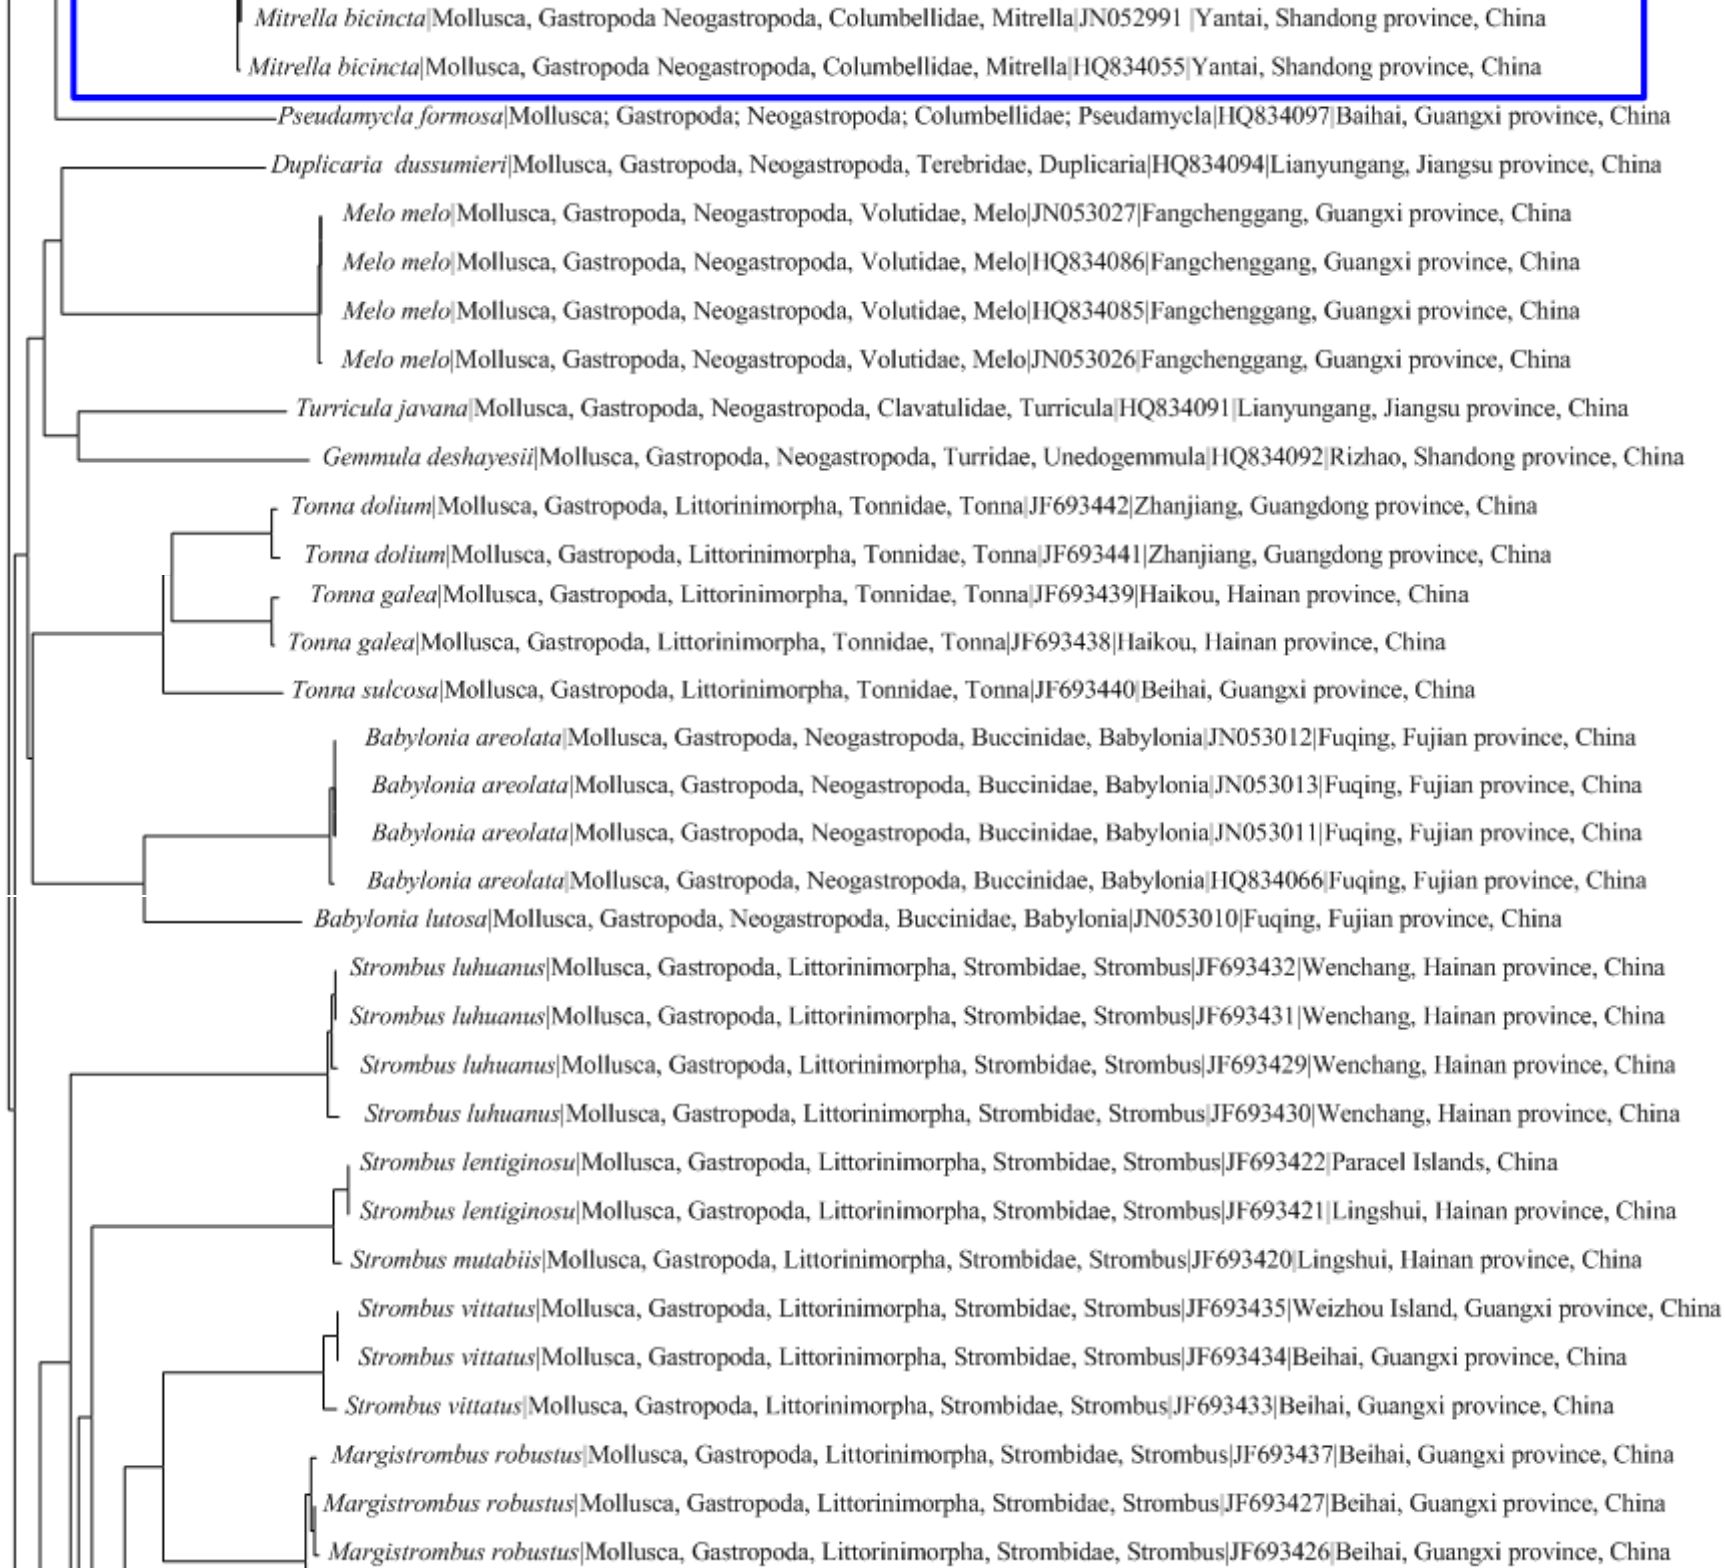

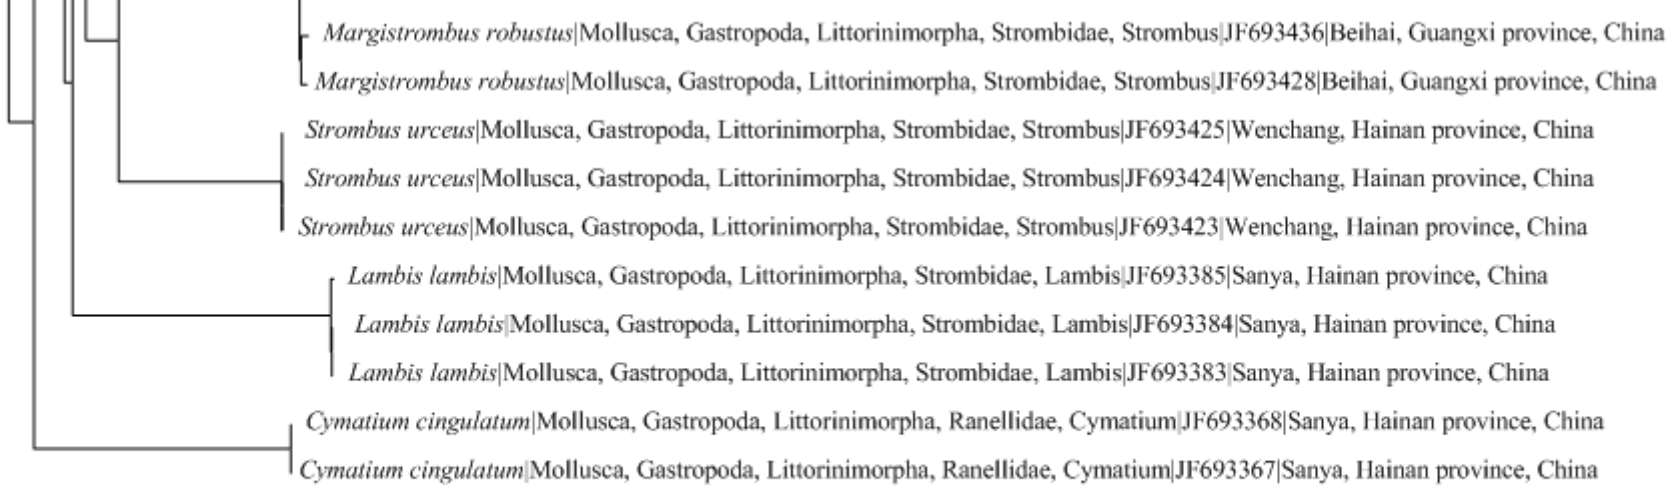

0.05
